# Supplementary material for: The Effect of Different Pollination on the Expression of Dangshan Su Pear MicroRNA
Source: Biomed Res Int. 2017 Apr 10;2017:2794040. doi: 10.1155/2017/2794040 (PMC5402243; doi:10.1155/2017/2794040)
Supplement: Supplementary file 1 — These Supplementary Materials contained the detailed data of the primer sequences used in this study, those known and novel microRNAs, differentially expressed microRNAs, the target genes of the differentially expressed microRNAs and which corresponding GO function enrichment analysis and KEGG pathway analysis in “Dangshan su” Pear of different male parent pollination. [file 2794040.f1.zip › Supplementary Material/Supplementary Material2/quantifier_miRseq.known_all_detected.stat.xls]

##Detected microRNAs in all samples
#mature id	mature sequence	precursor id	MFE(kcal/mol)	MFEI	Samples detected	precursor sequence
pyr-386	UUGGACUGAAGGGAGCUCCUU	pvu-MIR319c	-187.70	0.67	DangsuA,DangsuB	AUUUUUUCCAUGGUCACUCUCAUUACAACCUGCUAGUCCUUUUUCGUCUUUACGGUUUUCCUUUCUUUAUAACUCUGCUUGCUACUCUUGCAUCUCUUCAGCGCAGGAAUCGAUAAAAACAUGCCAGAAUUAGGGUUUCUGGUAGCCAUGCUUUUCAGUUUUAGCUCUAAGGAAGAAGGGAAAAGGAUGUACAUGUGCAGAGUUCGACUACAGCUUUAGUCACAUUGGGAAGGAAAGAGAGUGAAGGAGCUUCCCUCAGCCCAUUCAUGGAUACAAAAGAUUGGGUUGCAAAAUUAACCACUAACUCAUUCACACAAUAGUAUUCAGUUAGGGUGAUGCUCUUUUUGCUAUAAUAUGAUUGUGUGAAUGAAGUGAUGCAUACAUAUUGUGUGACCCUCU…
pyr-386	UUGGACUGAAGGGAGCUCCUU	ptc-MIR319f	-90.70	1.01	DangsuA,DangsuB	UAAUGGUGGGAGAGAGCUUCCUUCAGCCCACUCAUGGAUAGGAGAAAGGGGUUGAAUUAGCUGCCGACUCAUUCAUUCAAGCACCAGUAGAAAAAGGGGAAUGGAUAUUCUUUUGCUACUGUGAUUGUGUGAAUGAUGCGGGAGAUAAUUUUACAUCCCCUCUUUUUCUGUGCUUGGACUGAAGGGAGCUCCUUCCUUCUAU
pyr-386	UUGGACUGAAGGGAGCUCCUU	ptc-MIR319g	-77.30	0.82	DangsuA,DangsuB	UAAUCGUGGGAGAGAGCUUCUUUCAGCCCACUCGUGGAUAGGACAAAGGGGUUGAACUAGCUGCCGACUCAUUCAUUCAAGCACUAGUAGAAAAAAAGGCGAACGGUGUUUCUUUUGCUACUGUGAUUGUGUGAAUGAUGCGGGAGAUAAUUUUCCAUCCUCUCCUUUUCUGUGCUUGGACUGAAGGGAGCUCCUUCCUUCUCU
pyr-386	UUGGACUGAAGGGAGCUCCUU	mes-MIR319f	-92.30	1.07	DangsuA,DangsuB	UGGGAGCUCCUUUCAGUCCAAUACGGAGGGCUGAUCGCAGCAAGAGCUGCCAUCUCAUGCACCAUGGCAAUACUUGACAUUAAAGAAAUGUUAAAAUGUUAAGUUUGGCCAAGUGCAUGGUGUGGGAGCAACUCCUUCUGUGCUUCGCUCACCCAUUGGACUGAAGGGAGCUCCUU
pyr-386	UUGGACUGAAGGGAGCUCCUU	aly-MIR319d	-100.40	1.08	DangsuA,DangsuB	AUAGAUAGAUAUAUGAAUCGAGAUUAAAAUAGAUAGAUAUAGAAGGAGAUUCUUUCAGUCCAGUCAUGGAUAGAAAAAGAAGAGGGUAGAAAUAUCUGCCGACUCAUCCAUCCAAACACUCGUGGUAGAGAAACGAUCAAUUUUAAACCGCAGUGACUGUAUGAAUGAUGCGGGAGAUAUUUUUGAUCCUUCUUUAUCUGUGUUUGGACUGAAGGGAGCUCCUUCUUUUUCUACAAUUUUUUCAUUUUUUUCUCAUCAUCUGUUUAU
pyr-386	UUGGACUGAAGGGAGCUCCUU	aly-MIR319c	-97.10	1.06	DangsuA,DangsuB	AUAGAUAAAUAUAUGAAUCGAGAUUAAAAUAGAUAGAUAUAGAAGGAGAUUCUUUCAGUCCAGUCAUGGAUAGAAAAAGAAGAGGGUAGAAAUAUCUGCCGACUCAUCCAUCCAAACACUCGUGGUAGAGAAACGAUCAAUUUUAAACCGCAGUGACUGUAUGAAUGAUGCGGGAGAUAUUUUUGAUCCUUCUUUAUCUGUGUUUGGACUGAAGGGAGCUCCUUCUUUUUCUACAAUUUUUUCAUUUUUUUCUCAUUACCUGUUUAUAUAU
pyr-386	UUGGACUGAAGGGAGCUCCUU	mes-MIR319g	-93.90	0.93	DangsuA,DangsuB	GAAUGUGGAAAUGGUGUGAGAGAGCUUCCUUCAGCCCACUCAUGGAUGGGGUAAAAGGGGCGGAAAUAUCUGCCGACUCAUUCAUUCAAGCACUAGUAGACAGAGAUACUGGUAAUACUGUGUUUAGCUACUGUGAUUGCGUGAAUGAUGCGGGAGAUAAUUUUGCAUCCCUCUUUUCUGUGCUUGGACUGAAGGGAGCUCCUUCCUUCUCUAUUACCUACAUUU
pyr-386	UUGGACUGAAGGGAGCUCCUU	gma-MIR319q	-72.50	1.04	DangsuA,DangsuB	GAGAGUGAAGGAGUUUCCCUCAGCCCAUUCAUGGAUAUAAUGAAAGAUUGGGUUGCUGAAUUAACUGAUUCAUUCAUACAAUAGUAUUCAAUUAGGGUAAUAUUGUGUGAAUGAAGAGAGUAUAGUAUCUAUAUUGGAACCCCCUCUUUCUCUGUGCUUGGACUGAAGGGAGCUCCUUCUUUUU
pyr-386	UUGGACUGAAGGGAGCUCCUU	ath-MIR319c	-85.90	1.09	DangsuA,DangsuB	UAGAUAUAGAAGGAGAUUCUUUCAGUCCAGUCAUGGAUAGAAAAAGAAGAGGGUAGAAAUAUCUGCCGACUCAUCCAUCCAAACACUCGUGGUAGAGAAACGAUAAAUUUAAACCGCAGUGACUGUGUGAAUGAUGCGGGAGAUAUUUUUGAUCCUUCUUUAUCUGUGUUUGGACUGAAGGGAGCUCCUUCUUUUUCUA
pyr-386	UUGGACUGAAGGGAGCUCCUU	gma-MIR319l	-51.60	1.12	DangsuA,DangsuB	UGAAAGGUGCAGAAAUAGGAGUUCCCUUGCAGCCCAAAACACCCUGCAUGAACUACUUCAUGUUGUUUUGGACUGAAGGGAGCUCCUUCUUCUUCACUUUCA
pyr-386	UUGGACUGAAGGGAGCUCCUU	vun-MIR319b	-92.30	0.98	DangsuA,DangsuB	UUGGGAAGGAAAGAGAGUGAAGGAGCUUCCCUCAGCCCAUUCAUGGACACAGAAUAAGAUUGGGUUGCAAAAUUAACCACUAAUUGAUUCACACAAUAGUAUUGAGUUAGGGUGAUGCUGUUUUUGCUGUGAUAUGAUUGUGUGAAUGAAGUGGUGCAUAUAUAUUGUGACCCUCUUUCUCUGUGCUUGGACUGAAGGGAGCUCCUUCUUUCUGUUGCCUCCU
pyr-386	UUGGACUGAAGGGAGCUCCUU	gma-MIR319g	-83.80	1.07	DangsuA,DangsuB	GGGAAAGAGAGUGAAGGAGUUUCCCUCAGCCCAUUCAUGGAUAUAAUGAAAGAUUGGGUUGCUGAAUUAACUGAUUCAUUCAUACAAUAGUAUUCAAUUAGGGUAAUAUUGUGUGAAUGAAGAGAGUAUAGUAUCUAUAUUGGAACCCCCUCUUUCUCUGUGCUUGGACUGAAGGGAGCUCCUUCUUUUUCUGUUCCC
pyr-386	UUGGACUGAAGGGAGCUCCUU	cme-MIR319d	-82.00	0.96	DangsuA,DangsuB	AUGUAGGAGCUCUCUUCGGUUCAUCUCGAGACAGGUGGAAGGUCGAAACGUUGCUGCUCAUUCGUUAGUUCAAUAGCUCAUUAUCCAUCAAAUCUCCAUAAUUUUUAUAUCAAAGUUGUGUGAUGUGCUCCUGAUCUAACGAUGUAGGAGCAAUCUUUGAUCAUCGUUGUCAUGUAUUGGACUGAAGGGAGCUCCUUCACUUUUACU
pyr-386	UUGGACUGAAGGGAGCUCCUU	sly-MIR319c	-80.70	0.87	DangsuA,DangsuB	GGAAUGGUCCAAGAGAGCUUCCUUCAGCCCACUCACGGAGGAGAAAUGGGGUUGAAUUAGCUGCCGACUCAUUCAUCCAACCACUCAGUAGAAAGGAUAGGUUUUGUGCUACUGUGAUUGAGUGAAUGAUGCGGGAGAUAGUUUUCUAUCCCUCUCUUUCCUUGCUUGGACUGAAGGGAGCUCCUUUUCCCCAUU
pyr-386	UUGGACUGAAGGGAGCUCCUU	rco-MIR319d	-89.50	0.96	DangsuA,DangsuB	CCAAAGGAGCUCCUUUCAGUCCAAUAUGGAGGGCUUAGAAGCGGCAAAGAGCUGCCAUCUCAUGCAUUAAGGCAAUACUUGACAAGUUUUUCACAGUGAAAAUCUCAAGUUUGGCCUGGUGCAUGGUGUGGGAGCAACUCCUUCCCUCCUUCCCCCACCCAUUGGACUGAAGGGAGCUCCUUCUUUC
pyr-4092	CUGACAGAAGAUAGAGAGCAU	gma-MIR156r	-42.10	0.71	DangsuA,DangsuB	UUGUUAAUUGCUUUUUUCUCUUCUAGUUAUAUGGGGUUCGUGAUCAUAAUAUGAUGACAAUCCUAAUGCAUAAUAUUCUUUCGUAUUUUAUGCAGAGAGAGUGAAGGAUCAAGCACAUGCAUAAGAUAGAGCCUGCUGACAGAAGAUAGAGAGCAUAGCUGAACAU
pyr-272	UCAGCCAAGGAUGACUUGCCG	mes-MIR169e	-43.10	0.94	DangsuA,DangsuB	GAGGUAGAGAGUGUAAUUCAGCCAAGGAUGACUUGCCGGAAACACUGCGCAUCUUUGCCGGCAAGUUGUAGCUUGGCUAUGUUGUACUCUUUUCUUC
pyr-272	UCAGCCAAGGAUGACUUGCCG	mes-MIR169d	-47.00	1.07	DangsuA,DangsuB	GAGGUAGAGAGUGUAAUUCAGCCAAGGAUGACUUGCCGGAAGCACUGAUUAUACGGUCCGGCAAGUUGUUUCUUGGCUACAUUGUACUCUUUUCUUC
pyr-272	UCAGCCAAGGAUGACUUGCCG	ath-MIR169c	-124.50	0.90	DangsuA,DangsuB	UCGUCCAUUAUGAGUAUUAAUUAUGGUUAGGGAAUCUUACAGAAUGAAAAUGAAGGUGUGAAUGGAUUGUCUCAUCUAAAGCCUUGAAUGUGGGAAAAAGGCCAUUGUUGUUCAGCCAAGGAUGACUUGCCGGUAGCUUGUAUUAUGAUUACUCUAUAUUCGAUUUAUAUUAUGGAGAUGAUGGUUUAUAUAUAUUUACUUAUCUACAUAGUUUUAGUUGAUUUUUUUUCGUACGUAAUAUAAUACGAAAAAGUAUUUACUUAUUUAUAUAUGUGUGUUGGGGCAAGAAGUGUAACCAAGCUAGCCCGGCAAGUCAUCUAUGGCUAUGCAACUGUCUCUUCCUCUCAUUCUAGGCUUACGAUGACACGUAAAAAAUCCCAAAUAUCACUAAUAUGAUAU…
pyr-272	UCAGCCAAGGAUGACUUGCCG	aly-MIR169c	-101.40	0.98	DangsuA,DangsuB	GUCUCAUCUAAAGCCUUGAAUGUGGGAAAAAGGCCAUUGUUGUUCAGCCAAGGAUGACUUGCCGGUAGCUUUGUAUAUUUACUCUAUAUUCGGUUUAUAUUAUGGAGAUUAUGCUUUAUAUAUAUAUAUACAUAGUUUUAAUUGAUUUUUUUUCGUACGUACGUAAUCUAAUACGAAAAAGUAUUUACUUAUUUAUAUGUGUGUUGGUGAGAUGUGUAAACAAAGCAAGCCCGGCAAGUCAUCUCUGGCUAUGCAACUGCCUCUUCCUCUCAUUCUAGGCUUACGAUGACAC
pyr-272	UCAGCCAAGGAUGACUUGCCG	rco-MIR169b	-36.80	0.86	DangsuA,DangsuB	UAAUUCAGCCAAGGAUGACUUGCCGGCACAGCCUAUAUAUGUCUUCUACUCACAGCUGCUAGCUACCGGCAAGUUGUUCUUGGCUACAUUGUA
pyr-272	UCAGCCAAGGAUGACUUGCCG	ptc-MIR169s	-47.40	0.82	DangsuA,DangsuB	AGAGUGUGAUUCAGCCAAGGAUGACUUGCCGGCAGCAGGUAAGAGCAAAGCUCCGUUUUUGGAAGUUCAAGGAUAUCUUAACUUUUCCGGCCGGCAAGCUGUCCUUGGCUACAUUGUACU
pyr-272	UCAGCCAAGGAUGACUUGCCG	lus-MIR169j	-76.70	0.85	DangsuA,DangsuB	GAGAGCAUAGGCCUGAUAUGAAGAUGGAGAGACCGUGGUUCAGCCAAGGAUGACUUGCCGGGCGGCAUCCUGCUCCGAUCCGGUCCGAUCAUUCUCGGCUCGAUCCUCGGCAAGUUAUUCUUGGCUACAUUGCGCUCACUUGUUCUCAUUUCAGACCUCUCUAUGUUCUC
pyr-272	UCAGCCAAGGAUGACUUGCCG	ptc-MIR169h	-45.60	0.79	DangsuA,DangsuB	GAGUGUAAUUCAGCCAAGGAUGACUUGCCGGCAGCACGGGAUCUCAGAGCUUAAUAACUAGAAGAUCAAGGCUGUCAUUACUUUUCCGGCCGGCAAGUUGCCCUUGGCUACAUUGUAC
pyr-272	UCAGCCAAGGAUGACUUGCCG	cme-MIR169h	-62.30	0.77	DangsuA,DangsuB	UCAAGUGAUUCAGCCAAGGAUGACUUGCCGGCAAAACCAUUUAACUCUUUUUUUCUAAUUUCAAUUUUUUUUUUACUUCUCUAUUCUCGAGUUCAGUCGAUUAAAAUUCGAACUUCAAACAUCUAUUGAAGAUAUAUAAUAAUUUAACUAAUUGAAUUACAUUAAGAAUAGUCAACAAGUUGUACUAAAAAAAAUUAAUCGAGGAAAUGUAUGUAUAUAGUAAUGUUUUUUUGAACUUUUAUUUUGUUUACUUUUGGUCGGCAAGGCGUCUUUGGCUAUAUAACUUCC
pyr-272	UCAGCCAAGGAUGACUUGCCG	lus-MIR169f	-85.20	0.93	DangsuA,DangsuB	UGAUUUUGCGAAGUAGAACAUAGGCCUGAGAUGAAGACGGAGAGAGCGUGGUUCAGCCAAGGAUGACUUGCCGGACGGCUAGCUCCGGUUGUCAGCUCCAUCGUCGGCAAGUUGUUCUUGGCUACAUUGCGCUCACUUGUUCUCAUUUCAGACCUCUCUAUGUUCUCCCAUUUGGCAACUUCA
pyr-3955	UUGAUAAACCUCUGCAUCCAG	cln-MIR162	-41.10	0.82	DangsuA,DangsuB	UUAACUGGAGGCAGGGUUUUAUCCAUCCCUUCCUGUUACUGAUUUAAGGCUCUGCUCACAAUUAACUGCAGUUAACAGGCACGGGUUGAUAAACCUCUGCAUCCAGUUUGG
pyr-2015	UCGCUUGGUGCAGGUCGGGAC	nta-MIR168b	-65.70	0.84	DangsuA,DangsuB	UGUCUCUAAUUCGCUUGGUGCAGGUCGGGACUAAUUCGCCGGCGGCAAUCACGUCGGCGGUGAUUAUUCUACGAAGCUUAGAUGUACGAAGUUAUCAACAAUGUUCCUUUGCGGCGAAAUUUGGGUCCCGCCUUGCAUCAACUGAAUUGGAGACUGC
pyr-2015	UCGCUUGGUGCAGGUCGGGAC	nta-MIR168c	-63.90	0.82	DangsuA,DangsuB	GGUCUCUCAUUCGCUUGGUGCAGGUCGGGACCUGCCUCGCCGGCGACAAUGAUGUCAGCUGACGGUGACGGCGGCGUACCGAUAAAUAUACAUGCUGUUUGGGUCCCGCCUUGCAUCAACUGAAUCGGAGACUGC
pyr-2015	UCGCUUGGUGCAGGUCGGGAC	nta-MIR168a	-69.10	0.86	DangsuA,DangsuB	UGUCUCUAAUUCGCUUGGUGCAGGUCGGGACUAAUUCGCCGGUGGCGGCGGCGGCAAUCACAACGGCGGUGAUUGUUAUUAAAUGGAGAUUAGAUGUACGAAGUUAUCAACAUUUUUUGUUUUGCGGCGAAAUUUGUCCCGCCUUGCAUCAACUGAAUUGGAGACUGC
pyr-2015	UCGCUUGGUGCAGGUCGGGAC	sly-MIR168b	-78.40	0.88	DangsuA,DangsuB	UUGCGGUGGUUUCUCAUUCGCUUGGUGCAGGUCGGGACCUACCUCGCCGGCAACAAUGGCGGUAGCUGACGGCGACGGCAGCGUACCGGUAAAAAAGAAUCUUAUUUUUACAUGUUGUUGCGUAGUUUGGGUCCCGCCUUGCAUCAACUGAAUAGGAGACUGCGGUGA
pyr-2015	UCGCUUGGUGCAGGUCGGGAC	bra-MIR168b	-66.20	0.95	DangsuA,DangsuB	CGGGCUCGGAUUCGCUUGGUGCAGGUCGGGACUAAUUCGCUGACACAGCCACGUGGAUUUUCCUUAUUGGUUUGUGAGCAGGGAUUGGAUCCCGCCUUGCAUCAACUGAAUCGGAGCCUCGAUGGUG
pyr-2015	UCGCUUGGUGCAGGUCGGGAC	bra-MIR168c	-65.40	0.91	DangsuA,DangsuB	GAAUCACCGUCGGGCUCGGAUUCGCUUGGUGCAGGUCGGGACACAAAUCACUGGUGCUUUUGCCUUAUUGGUUUGUGAGCAGGGAUUGGCUCCCGCCUUGCAUCAACUGAAUCGGAGCCUCCAAUGGUGAAAC
pyr-2015	UCGCUUGGUGCAGGUCGGGAC	sly-MIR168a	-65.70	0.78	DangsuA,DangsuB	CUCUUAUUCGCUUGGUGCAGGUCGGGACCUCAUUCGCCGGCGCCGGGAAUAAUGCCGGACGAACGACGGCGGUGUUAAUUCUACUAAAGCUGUCACCGACGGAUAGAUGUUUGAUUAGCGGCGAAAUUUGGGUCCUGCCUUGCAUCAACUGAAUUGGAG
pyr-3829	UCAAGCUGCCAGCAUGAUCUA	cme-MIR167e	-32.10	0.92	DangsuA,DangsuB	UUAUAUCAGUUCAAGCUGCCAGCAUGAUCUAACCUUAACCUCUCCUAAUUUUUAAUUUUUAAUUUUGUAAAUAUUGAGGUUAAUGAUCAGAUCAUAUGGCAGUUUUACCUGUUAUUG
pyr-3829	UCAAGCUGCCAGCAUGAUCUA	aqc-MIR167	-30.40	1.05	DangsuA,DangsuB	UCAAGCUGCCAGCAUGAUCUAAAAAUCUCUGCAUGUGGGGAUUAUCAGAUCAUGCUGCAGUUUAACCU
pyr-494	AUUGAGUGCAGCGUUGAUGAC	ssl-MIR397	-38.80	0.97	DangsuA,DangsuB	UCAUUGAGUGCAGCGUUGAUGACAUCGGCAUUCGUCCUUUUCCUUCGUCUCCGACUGUCGUUUCAUUGACGCUGCACUCAAUA
pyr-633	UGUUAUAUUGUCAGAUUGUCA	mdm-MIR7120b	-101.10	1.87	DangsuA,DangsuB	AUGUAUGUAUAUGUAUUAAAAUGUUCUUUUGCCAGCCAAUGUGGCUUGUUAUAUUGUCAGAUUGUCAAUCUGAACCUUUAAUUACCAUUAAUUUACGUAAUUAAUGGUUCAGAUUGACAGUCUGACAAUAUAACGUGCCAAACUGUUUGGCAAUUGAGCAUUUUCAUACAUAUAUAUAUAU
pyr-633	UGUUAUAUUGUCAGAUUGUCA	mdm-MIR7120a	-101.10	1.87	DangsuA,DangsuB	AUGUAUGUAUAUGUAUUAAAAUGUUCUUUUGCCAGCCAAUGUGGCUUGUUAUAUUGUCAGAUUGUCAAUCUGAACCUUUAAUUACCAUUAAUUUACGUAAUUAAUGGUUCAGAUUGACAGUCUGACAAUAUAACGUGCCAAACUGUUUGGCAAUUGAGCAUUUUCAUACAUAUAUAUAUAU
pyr-3000	ACAGAAGAUAGAGAGCACAG	aqc-MIR156a	-42.40	1.18	DangsuA,DangsuB	UGACAGAAGAUAGAGAGCACAGAUGACGAAUUGCAUGGAGUUUGCAUCUCGAUACUUUGUGCUCUCUAUGCUUCUGUCACC
pyr-3000	ACAGAAGAUAGAGAGCACAG	aly-MIR157b	-45.40	1.11	DangsuA,DangsuB	GUGUUGACAGAAGAUAGAGAGCACAGAUGAGAAGAUACAAUUCUUCGCAGCUUCUUUGCAUCUUACUCCUUUGUGCUCUCUAAGCUUCUGUCAUCAC
pyr-3000	ACAGAAGAUAGAGAGCACAG	aly-MIR157a	-54.10	1.08	DangsuA,DangsuB	GAGGCAUUGAGAGUGUUGACAGAAGAUAGAGAGCACAGAUGAUAAGAUACAAUUCGGAGCAGUUUCUUUGCAUCUUACUCCUUUGUGCUCUCUAGCCUUCUGUCAUCACCUUUUAUUUGCUUU
pyr-3000	ACAGAAGAUAGAGAGCACAG	aqc-MIR156b	-44.00	1.19	DangsuA,DangsuB	UGACAGAAGAUAGAGAGCACAGAUGAUGAUAUGCAUGGAGAGUCUGCAUCUCACUCCUUUGUGCUCUCUAUGCUUCUGUCAUC
pyr-3000	ACAGAAGAUAGAGAGCACAG	vvi-MIR156g	-49.00	1.00	DangsuA,DangsuB	GGUGAUGUUGUUGACAGAAGAUAGAGAGCACAGAUGAUGAUGUGCAUGGAGUUUGCAUCUCACUCCUUUGUGCUCUCUAGACUUCUGUCAUCACCUCAGCCCC
pyr-3000	ACAGAAGAUAGAGAGCACAG	mes-MIR156i	-46.80	1.34	DangsuA,DangsuB	UUGACAGAAGAUAGAGAGCACAGAUGAUGAUGUGCAAUUAAUGGAACUCAGCAUCUCACUCAUUUGUGCUCUCUAUGCUUCUGUCA
pyr-3000	ACAGAAGAUAGAGAGCACAG	mes-MIR156h	-43.80	1.25	DangsuA,DangsuB	UUGACAGAAGAUAGAGAGCACAGAUGAUGAUAUGCAAUAAUGGACUCUGCAUCUCACUCCUUUGUGCUCUCUAUGCUUCUGUCAU
pyr-3000	ACAGAAGAUAGAGAGCACAG	mes-MIR156j	-44.50	1.35	DangsuA,DangsuB	UUGACAGAAGAUAGAGAGCACAGAUGAUGAUGAAAUGCAUAAAGUUUGCAUCUCACUCCUUUGUGCUCUCUACUCUUCUGUCAU
pyr-3000	ACAGAAGAUAGAGAGCACAG	bna-MIR156g	-52.10	1.04	DangsuA,DangsuB	CGUUGAUAGUGUUGACAGAAGAUAGAGAGCACAGAUGAUGAGAUGCAAUUUGGAGCAGCUUGUAUGCAUCGUACUCCUUUGUGCUCUCUAGUCUUCUGUCAUCACUCGUUACUUG
pyr-3000	ACAGAAGAUAGAGAGCACAG	nta-MIR156h	-46.50	0.95	DangsuA,DangsuB	GGAGAUGCUGUUGACAGAAGAUAGAGAGCACAGAUGAUGAUAAGAUGCUAAUUGGAAGCUUUCUGCACCUUAAUCCUUUGUGCUCUCUAGUCUUCUGUCAUCAUCCUCAGCC
pyr-3000	ACAGAAGAUAGAGAGCACAG	mdm-MIR156y	-45.20	1.16	DangsuA,DangsuB	UGCUGACAGAAGAUAGAGAGCACAGAUGAGGAAAUGCAAGAACAAGGCAGCAUCUCCAUCCUUUGUGCUCUCUAUUCUUCUGUCAACA
pyr-3000	ACAGAAGAUAGAGAGCACAG	stu-MIR156a	-41.50	1.22	DangsuA,DangsuB	UUGACAGAAGAUAGAGAGCACAGAUGAUAAAGUGCAUGGAAAUUGUCUGCACCUUACUCCUUUGUGCUCUUUAUUCUUCUGUCAUCA
pyr-3000	ACAGAAGAUAGAGAGCACAG	mdm-MIR156p	-48.20	1.15	DangsuA,DangsuB	UGAAUUUGCUGACAGAAGAUAGAGAGCACAGAUGAGGAAAUGCAAAAACAAGGCAGCAUCUCCAUCCUUUGUGCUCUCUAUUCUUCUGUCAACACCUUCA
pyr-3000	ACAGAAGAUAGAGAGCACAG	mdm-MIR156q	-45.20	1.16	DangsuA,DangsuB	UGCUGACAGAAGAUAGAGAGCACAGAUGAGGAAAUGCAAGAACAAGGCAGCAUCUCCAUCCUUUGUGCUCUCUAUUCUUCUGUCAACA
pyr-3000	ACAGAAGAUAGAGAGCACAG	mdm-MIR156r	-48.20	1.15	DangsuA,DangsuB	UGAAUUUGCUGACAGAAGAUAGAGAGCACAGAUGAGGAAAUGCAAAAACAAGGCAGCAUCUCCAUCCUUUGUGCUCUCUAUUCUUCUGUCAACACCUUCA
pyr-3000	ACAGAAGAUAGAGAGCACAG	mdm-MIR156s	-45.20	1.16	DangsuA,DangsuB	UGCUGACAGAAGAUAGAGAGCACAGAUGAGGAAAUGCAAGAACAAGGCAGCAUCUCCAUCCUUUGUGCUCUCUAUUCUUCUGUCAACA
pyr-3000	ACAGAAGAUAGAGAGCACAG	mdm-MIR156x	-48.20	1.15	DangsuA,DangsuB	UGAAUUUGCUGACAGAAGAUAGAGAGCACAGAUGAGGAAAUGCAAAAACAAGGCAGCAUCUCCAUCCUUUGUGCUCUCUAUUCUUCUGUCAACACCUUCA
pyr-3000	ACAGAAGAUAGAGAGCACAG	bgy-MIR156	-44.00	1.19	DangsuA,DangsuB	UGUUUGACAGAAGAUAGAGAGCACAGAUGAUGAUGUGCAAUUUUUGGAUUCUGCAUCUCACUCCUUUGUGCUCUCUAUGCUUCUGUCAUCA
pyr-3000	ACAGAAGAUAGAGAGCACAG	mdm-MIR156z	-48.20	1.15	DangsuA,DangsuB	UGAAUUUGCUGACAGAAGAUAGAGAGCACAGAUGAGGAAAUGCAAAAACAAGGCAGCAUCUCCAUCCUUUGUGCUCUCUAUUCUUCUGUCAACACCUUCA
pyr-3000	ACAGAAGAUAGAGAGCACAG	vvi-MIR156i	-48.10	1.00	DangsuA,DangsuB	GGUGACGUUGUUGACAGAAGAUAGAGAGCACAGAUGAUGAAAUGCAAGGAGCCAGCAUCUCACUCCUUUGUGCUCUCUAUUCUUCUGUCAUCACCUUAAGGCC
pyr-3000	ACAGAAGAUAGAGAGCACAG	gma-MIR156d	-51.57	0.92	DangsuA,DangsuB	CUACUUGGUAAUUAAGGUUGUUGACAGAAGAUAGAGAGCACAGAUGAUGAUAUGCAUAUUAUAUAAUAUAUAGCAGGGAACUCAUGAUGAAUUGUGCAUCUUACUCCUUUGUGCUCUCUAUACUUCUGUCAUCACCUUCAGCCUCCAUUUC
pyr-3000	ACAGAAGAUAGAGAGCACAG	gma-MIR156g	-54.70	1.22	DangsuA,DangsuB	UGAACAAUAUCUUGAACAGUUUGUUGACAGAAGAUAGAGAGCACAGGUGAUCAUACCCAAAAAAGCUUUUGUGUGUGAGCAGUUUUGUGCUCUCUAUCUUCUGUCAAUGUACUUCUCA
pyr-3000	ACAGAAGAUAGAGAGCACAG	tcc-MIR156e	-59.70	1.09	DangsuA,DangsuB	AGGAGGAACUGGUGAUGUUGUUGACAGAAGAUAGAGAGCACAGAUGAUGAGAUGCAUGGAGCCUGCAUUUCACUCCUUUGUGCUCUCUAUUCUUCUGUCAUCACCUUUCAUCCCCUCACUUAA
pyr-3000	ACAGAAGAUAGAGAGCACAG	cpa-MIR156f	-44.20	1.08	DangsuA,DangsuB	UUGACAGAAGAUAGAGAGCACAGAUGAUGAUAUGCAAUUCAUUAAUGGAUCAGAUCAACUCUCUGCAUCUCACUCCUUUGUGCUCUCUAUGCUUCUGUCAUCA
pyr-3000	ACAGAAGAUAGAGAGCACAG	cpa-MIR156e	-43.00	1.13	DangsuA,DangsuB	UUGACAGAAGAUAGAGAGCACAGAUGAUGAAAUGCAAAUUAGAAGGACCAAACAGUGCAUCUCACUCCUUUGUGCUCUCUAUUCUUCUGUCAUCA
pyr-3000	ACAGAAGAUAGAGAGCACAG	gma-MIR156m	-49.30	1.01	DangsuA,DangsuB	AGGGUUGUUGACAGAAGAUAGAGAGCACAGAUAGUGAUAUGCAUAAAAAUAUGGAACGGGAAAGCAAUUGCAUCUCACUCCUUUGUGCUCUCUAGGCUUCUGUCAUCCACACCUU
pyr-3000	ACAGAAGAUAGAGAGCACAG	gma-MIR156l	-45.90	0.90	DangsuA,DangsuB	GGUAAGGUUGUUGACAGAAGAUAGAGAGCACAGAUGAUGAUAUGCACAUAUACAUGGAACAGGAAUUUAAGCAAUUGCAUCUCACUCCUUUGUGCUCUCUAAGCUUCUGUCAUCCACCUCC
pyr-3000	ACAGAAGAUAGAGAGCACAG	ptc-MIR156j	-46.40	1.05	DangsuA,DangsuB	GGUGAUGUUGUUGACAGAAGAUAGAGAGCACAGAUGAUGAUAUGCAAUGGACUCUGCAUCCCACUCCUUUGUGCUCUCUAUGCUUCUGUCAUCACUUUCA
pyr-3000	ACAGAAGAUAGAGAGCACAG	gma-MIR156i	-52.44	1.03	DangsuA,DangsuB	UUAAGGUUGUUGACAGAAGAUAGAGAGCACAGAUGAUGAUAUGCAUAUUAUAUAAAAAGCAGCUAGGGAACUCAUGAAUUGUGCAUCUCACUCCUUUGUGCUCUCUAUACUUCUGUCAUCACCCUUCAGC
pyr-3000	ACAGAAGAUAGAGAGCACAG	gma-MIR156j	-41.90	1.02	DangsuA,DangsuB	GGUGAUGCUGUUGACAGAAGAUAGAGAGCACAGAUGAUGAAAUGCAAGAAAGGAAAUGGCAUCUUACUCUUUUGUGCUCUCUAGUCUUCUUGUCAUCAUCAUU
pyr-3000	ACAGAAGAUAGAGAGCACAG	mdm-MIR156ab	-82.20	0.96	DangsuA,DangsuB	AGGAGUGGGGAACUGGGAGAGAGAAAGAGCAGGGAGUGAUGAUACAUUGUUGACAGAAGAUAGAGAGCACAGAUGGAUGACUUGCAAUUGACUAUGCAUCUCACUCCUUUGUGCUCUCUAUGCUUCUGUCAUCACCUCGUUAUAUCUAGCUUCCUUGCCUCUCUCCACACCCGUGCACCU
pyr-3000	ACAGAAGAUAGAGAGCACAG	mdm-MIR156ac	-98.30	0.90	DangsuA,DangsuB	CAAUCUCUAAUCAUAUUAUAGUAUUAAAUUUAGGGUAAGGACUAGGGAACUGGGAGAGAGAAAGAGCAGGGAGUGGUGAUACGUUGUUGACAGAAGAUAGAGAGCACAGAUGGAUGACUUGCAAUGGACUAUGCAUCUCACUCCUUUGUGCUCUCUAUGCUUCUGUCAUCACCUAGCUAUAUCCAGCUUCCCUGCCCCUCCCCCACACCCCUGCACCUCCCAUAUUAAUCUAAUUCAUAAAAUGAUUAUUUGAUUG
pyr-3000	ACAGAAGAUAGAGAGCACAG	mdm-MIR156aa	-45.20	1.16	DangsuA,DangsuB	UGCUGACAGAAGAUAGAGAGCACAGAUGAGGAAAUGCAAGAACAAGGCAGCAUCUCCAUCCUUUGUGCUCUCUAUUCUUCUGUCAACA
pyr-3000	ACAGAAGAUAGAGAGCACAG	smo-MIR156b	-52.10	0.95	DangsuA,DangsuB	UGGACUGCUGCUGACAGAAGAUAGAGAGCACAGACGUUUGGCUGCAAGAGCGGAAUCCAUAUCCAGCAGCUCUGCGUUCGUGCUCUCUAUUCUUCUGUCAUCAAUCUUUCGA
pyr-3000	ACAGAAGAUAGAGAGCACAG	ppe-MIR156f	-65.10	0.99	DangsuA,DangsuB	AGCUAGUAGAGGAGGCAUAGGUGAUUUUGCUGACAGAAGAUAGAGAGCACAGAUGGUGAAAUGCAUGAACAAGGCAGCAUCUCAAUCCUUUGUGCUCUCUAUGCUUCUGUCAUCACCUUCAUCCCCUUACCUCCCCUAUUUGCU
pyr-3000	ACAGAAGAUAGAGAGCACAG	nta-MIR156g	-49.80	0.82	DangsuA,DangsuB	GUGAGAUUGUUGACAGAAGAUAGAGAGCACAGAUGAUGAUCAUGCUGCUAAAUCUGGGAUUGGAGAGGGCACUGAAUCAAUUAAACUGCAAAAAAAAAAAGCAUCUCAAUUCAUUUGUGCUCUCUAUGCUUCCGUCAUCACCUUCACCG
pyr-3000	ACAGAAGAUAGAGAGCACAG	han-MIR156c	-44.70	1.18	DangsuA,DangsuB	AUGUUGACAGAAGAUAGAGAGCACAGAGAAGCAUGAAUUGCACAUAGAUAUUGCAAUUCACUCCUUCGUGCUCUCUAUGCUUCUGUCAUUACC
pyr-3000	ACAGAAGAUAGAGAGCACAG	mtr-MIR156h	-42.40	1.06	DangsuA,DangsuB	UGCUGUUGACAGAAGAUAGAGAGCACAGAUGAUGAAAUGCAUGGAAGGCAAUGGCAUCUCAUUCCUUUGUGCUCUUUAUUCUUCUGUCAUCACC
pyr-3000	ACAGAAGAUAGAGAGCACAG	vun-MIR156b	-56.20	1.00	DangsuA,DangsuB	AGGAGGUGUUGGUGAUGCUGUUGACAGAAGAUAGAGAGCACAGAUGAUGAAAUGCAUGAAAGGAAAUUGCAUCUCGCUCCUUUGUGCUCUCUAUUCUUCUGUCAUCACCCUUUUGUACCUUCCCUC
pyr-3000	ACAGAAGAUAGAGAGCACAG	ath-MIR157b	-55.40	0.94	DangsuA,DangsuB	UGGGAGGCAUUGAUAGUGUUGACAGAAGAUAGAGAGCACAGAUGAUAAGAUACAAUUCCUCGCAGCUUCUUUGCAUCUUACUCCUUUGUGCUCUCUAGCCUUCUGUCAUCACCCGUUAUUUGCCAUCACCCA
pyr-3000	ACAGAAGAUAGAGAGCACAG	mtr-MIR156e	-81.30	1.56	DangsuA,DangsuB	GGUUGUUGACAGAAGAUAGAGAGCACAGAUGAUGAUAUGCAUUUAUAUAUAUAUAUAUAUAUAUAUAUAUAUAUAUAUAUAUAUAUAUAUAUAUAUAUGAGGAGCUGGAGCUGCAUGGAGAUGAAUUUUGUGCAUAUCACUCCUUUGUGCUCUCUAUGCUUCUGUCAUCACC
pyr-3000	ACAGAAGAUAGAGAGCACAG	ath-MIR157a	-46.00	1.07	DangsuA,DangsuB	GUGUUGACAGAAGAUAGAGAGCACAGAUGAUGAGAUACAAUUCGGAGCAUGUUCUUUGCAUCUUACUCCUUUGUGCUCUCUAGCCUUCUGUCAUCACC
pyr-3000	ACAGAAGAUAGAGAGCACAG	gra-MIR157b	-44.30	1.05	DangsuA,DangsuB	GUUGUUGACAGAAGAUAGAGAGCACAGAUGAUGGUGUUGCCUAUGUGCAUGCAUCCCACUCCUUUGUGCUCUCUAUGCUUCUGUCAUCAUC
pyr-3000	ACAGAAGAUAGAGAGCACAG	gra-MIR157a	-44.40	0.99	DangsuA,DangsuB	GUUGUUGACAGAAGAUAGAGAGCACAGAUGAUGGUGUGCAAUUAGGAGUCUUGAAGCAAUGCAUCCCACUCCUUUGUGCUCUUUAUGCUUCUGUCAUCACC
pyr-3000	ACAGAAGAUAGAGAGCACAG	lus-MIR156h	-38.40	1.20	DangsuA,DangsuB	UUGACAGAAGAUAGAGAGCACAGAUGAUGAGAUACUAAUGAAAGAAUCUCACUUUCCUUUGUGCUCCCUAUGCUUCUGUCAU
pyr-3000	ACAGAAGAUAGAGAGCACAG	lus-MIR156i	-68.10	1.05	DangsuA,DangsuB	AUAUGAAGGAAAGAGGUGGAUUUGGAUAUAUUGGUUGUUGACAGAAGAUAGAGAGCACAGAUGAUCUGGGAUGUCUCGAACCAUAUAUAUAUAUAUCUGCAUCUCCAUCCUUUGUGCUCUCUAGUCUUCUGUCAUCACCUUCAUCCAUCCUAGCUUUCUUUUGUGU
pyr-3000	ACAGAAGAUAGAGAGCACAG	ptc-MIR156i	-40.80	0.93	DangsuA,DangsuB	UGUGAUGUUGUUGACAGAAGAUAGAGAGCACAGAUGAUGUUUUGCAGUAGACUCUGGAUCUCACUCCUUUGUGCUCUCUAUGCUUCUGCCAUCACCUUC
pyr-3000	ACAGAAGAUAGAGAGCACAG	ptc-MIR156g	-49.70	1.13	DangsuA,DangsuB	GGUGAUGUUGUUGACAGAAGAUAGAGAGCACAGAUGAUGAAAUGCAUGGAGCUUAAUUGCAUCUCACUCCUUUGUGCUCUCUAGUCUUCUGUCAUCACCUUCA
pyr-3000	ACAGAAGAUAGAGAGCACAG	lus-MIR156e	-50.60	0.99	DangsuA,DangsuB	GGAAGGAUAAGGAUUGUUGUUGUUGACAGAAGAUAGAGAGCACAGAUGAUGAAAUACUGUAGUGAAAGUAUCUCACUUUCCUUUGUGCUCCCUAUGCUUCUGUCAUCACAUGCACCUUCCUUUC
pyr-3000	ACAGAAGAUAGAGAGCACAG	lus-MIR156f	-60.50	0.95	DangsuA,DangsuB	GGGUUGAGAGCUCUUUUGGGGGAUGUUGUUGACAGAAGAUAGAGAGCACAGAUGAUGGGAUACAAUUGAUAGUAUACAUAUCUCACUUCCUUUGUGCUCUCUAUGCUUCUGUCAUCAUCUUUUCGAGCGGCCUCCUCGAUCC
pyr-3000	ACAGAAGAUAGAGAGCACAG	hbr-MIR156	-58.10	1.06	DangsuA,DangsuB	GGGCACUGGUGGUGAUGUUGUUGACAGAAGAUAGAGAGCACAGAUGAUGAUAUGCAAUUAAUGGACUCUGCAUCUCACUCCUUUGUGCUCUCUAUGCUUCUGUCAUCACCUUCAGCCCU
pyr-3000	ACAGAAGAUAGAGAGCACAG	lus-MIR156b	-76.60	1.05	DangsuA,DangsuB	UUAGAGGAGAUGAAGGUUUUGGGUUGAGAGCCCUUUUGGGAUAUGUUGUUGACAGAAGAUAGAGAGCACAGAAGAUGAUGGGAUACAAUUGAUAGUAUCUCACUUCCUUUGUGCUCUCUAUGUUUCUGUCAUCACCUGUUCGGGCCUCUUCCAUCCUUCCUCUUUUUCGA
pyr-3000	ACAGAAGAUAGAGAGCACAG	lus-MIR156c	-46.80	1.09	DangsuA,DangsuB	GGUUUGUUGACAGAAGAUAGAGAGCACAGAUGAUUUUGGGAUGUCGUCAAACCCCACAUCGCCAUCAUUUGUGCUCUCUAUGUUUCUGUCAUCACUUUC
pyr-3000	ACAGAAGAUAGAGAGCACAG	cme-MIR156f	-48.60	1.16	DangsuA,DangsuB	UAUAUUGUUGCUGACAGAAGAUAGAGAGCACAGAUGGGGAGAUGCAUAAAUUCAAGGGAAAGCUUCUCUUUCAUUUGUGCUCUCUAUUCUUCUGUCAUCACCUUUCA
pyr-3000	ACAGAAGAUAGAGAGCACAG	ppe-MIR156g	-46.30	1.40	DangsuA,DangsuB	UUGACAGAAGAUAGAGAGCACAGAUGGAUGAUUUGCAAUCAAUAUGCAUCUCACUCCUUUGUGCUCUCUAUGCUUCUGUCAU
pyr-3000	ACAGAAGAUAGAGAGCACAG	cme-MIR156b	-53.50	0.94	DangsuA,DangsuB	UAUAUGUUGUUGACAGAAGAUAGAGAGCACAGAUGAUGAUAUGCAAAAAUUUCAUCAAUCAUUAUUAUUAAUAUCAUUCUUUGUUUUUUAGGGUUUAGAACUUUAGAGAGAGACAUUAUUAUCCUUAUCACUAUGCAUUUCACUCCAUUUGUGCUCUCUAUGCUUCUGUCAUCACUCUCUUC
pyr-3000	ACAGAAGAUAGAGAGCACAG	ppe-MIR156h	-48.50	0.97	DangsuA,DangsuB	AGGUUUUGUUGACAGAAGAUAGAGAGCACAGAUGAAGAAAUGCAUGGACAUCGACAUGGCAGGCAGCAUCUCUCUCCUUUGUGCUCUCUAUGCUUCUGUCAUCACACCU
pyr-3000	ACAGAAGAUAGAGAGCACAG	bcy-MIR156	-44.00	1.19	DangsuA,DangsuB	UGUUUGACAGAAGAUAGAGAGCACAGAUGAUGAUGUGCAAUUUUUGGAUUCUGCAUCUCACUCCUUUGUGCUCUCUAUGCUUCUGUCAUCA
pyr-3000	ACAGAAGAUAGAGAGCACAG	rco-MIR156h	-45.50	1.11	DangsuA,DangsuB	UGUUGUUGACAGAAGAUAGAGAGCACAGAUGAUGAUGUGCAAUGACUUUUUCUGCAUCUCACUCCUUUGUGCUCUCUAUGCUUCUGUCAUCACCUUC
pyr-1064	UGACAACGAGAGAGAGCACGG	mes-MIR535b	-52.90	1.00	DangsuA,DangsuB	GCUUUGACAUCAUUCGUUGACAACGAGAGAGAGCACGGUUGUCAGCAUUUCAUGCAAGGGACAUGACUGUUUACAAGCGUGCUGUCUAUCGUUGUCAUAAGAAGUGCUCAGAGC
pyr-166	UCUUCCCUAUUCCUCCCAUUCC	pta-MIR482c	-44.60	1.09	DangsuA,DangsuB	AGGAGUGGGAGGGUAGGAGAAGGCUCUGUGGUGAGGUCUCAGUCAUAAUCUCAUCAGUCUUCCCUAUUCCUCCCAUUCCU
pyr-166	UCUUCCCUAUUCCUCCCAUUCC	pab-MIR482b	-52.90	0.98	DangsuA,DangsuB	AUGUGGAUGGAAGUCUUGAGGAUUGGGAGGAUAGGAGAAGGCUGUUUGCUUAAUUCUCAGUUGAAACCUGAUUAGUCUUCCCUAUUCCUCCCAUUCCUAUUGCCUCCAUCACACAUCCCUU
pyr-166	UCUUCCCUAUUCCUCCCAUUCC	pde-MIR482b	-59.90	1.03	DangsuA,DangsuB	AUGUGGAUGGAAGUCUUGAGGAGUGGGAGGGUAGGAGAAGGCUCUGUGGUGAGGUUUCAGUCAUAAUCUCAUCAGUCUUCCCUAUUCCUCCCAUUCCUAUUGCCUCCCUUCACAAUGUAAC
pyr-892	AUUGGAGUGAAGGGAGCUCCA	gma-MIR159f	-88.40	1.00	DangsuA,DangsuB	ACCCAAGUUGGAGUUCCCUGCACUCCAAGUCUGAAAGGAUAUGAUGGUAAACCUCUGCUGCUAGUUCAUGGAUACCUCUGGCCUCGUAACAACAUGCGUUCGAAGUCAAGGGUUUGCAUGACCUGGGAGAUGAGUUUACCUUGACCUUUUGGUAUUGGAGUGAAGGGAGCUCCAGAGGGU
pyr-892	AUUGGAGUGAAGGGAGCUCCA	mtr-MIR159b	-78.20	0.98	DangsuA,DangsuB	AACCUAAUUUGGGGCUCUCCGCACUCCAAGUCUAAAAGGAGGUGAUAGUUUACCCUUGCUGCUUGUUCAUGGUUACCUUUGACUUUGCACAUUGGAAACUUACCAAAGUCAUGGGUUUGCAUGAAUUUGGAGAUAGGGUUGCCUUGAUCUUUUUGUAUUGGAGUGAAGGGAGCUCCAAAAUUGGAC
pyr-892	AUUGGAGUGAAGGGAGCUCCA	gma-MIR159b	-85.70	1.01	DangsuA,DangsuB	AAACCCAACUUGGAGUUCCCUGCACUCCAAGUCUGAAAGGAUAUGAUGGUAAACCUCUACUGCUAGUUCAUGGAUACCUCUGACUUCUUAACAACAUGCGUUCGAAGUCAAGGGUUUGCAUGCCCUGGGAGAUGAGUUUACCUUGAUCUUUUGGUAUUGGAGUGAAGGGAGCUCCAGAGGGUAUUC
pyr-893	AUUGGAGUGAAGGGAGCUCCG	gma-MIR156aa	-80.90	0.94	DangsuA,DangsuB	UAAACUCAAGUUGGAGCUCUCUGCACUCCAGUGUUGAAGGAGGUGAUGGUAAACCCUAGCUGCUAAUUCAUGGUUACCUUUGGCUUCCCAUAAGGAAGCAUGUGAAAGUCAUGGGUUUACAUGAAUAUGGAGACGGGGUUGCCUUGAUCUUUUGGUAUUGGAGUGAAGGGAGCUCCGAAUUAGGCCU
pyr-893	AUUGGAGUGAAGGGAGCUCCG	gma-MIR159c	-79.80	0.94	DangsuA,DangsuB	ACCCAAGUUGGAGCUCUCUACACUCCAAGUCUGAAGGAAGUGACGGUAGACCCUUGCUGCUAAUUCAUGGUUACCUUUGGAUUCAGAUAAGGAAGCAUGUGAAAGUCAUGGGUCUGCAUGAAUUUGAAGACGGGGCUACCUUGAUCUUUUAGUAUUGGAGUGAAGGGAGCUCCGAAUUAGGCCUU
pyr-891	UGAAGCUGCCAGCAUGAUCUUA	csi-MIR167b	-51.90	0.88	DangsuA,DangsuB	AUCGGGCACCACUAUCAGAUGAAGCUGCCAGCAUGAUCUUAACUUUCCUCCUUUGCUCGAGGAAUGAUACAGAUCAUGCGGCAGUUUCACCUGUUCGUUGGUUGCACGAAAUUACGAGUCCAG
pyr-891	UGAAGCUGCCAGCAUGAUCUUA	gra-MIR167c	-41.20	0.92	DangsuA,DangsuB	UGCUCCAUCAUCAGAUGAAGCUGCCAGCAUGAUCUUAAUUUCCCUCUGUUUUAUCGAGGAAAAAUCAGAUCAUGUGGCAGUUUCACCUGUUGCUGCUUGCAC
pyr-891	UGAAGCUGCCAGCAUGAUCUUA	cpa-MIR167c	-29.50	0.92	DangsuA,DangsuB	UGAAGCUGCCAGCAUGAUCUUAACCUCUCUCUUAUCAUGCAGAGUGAAGAUCAGAUCAUAUGGCAGUUUCACC
pyr-891	UGAAGCUGCCAGCAUGAUCUUA	ahy-MIR167	-49.20	0.95	DangsuA,DangsuB	GAUCAUGCACCACUACAAGUUGAAGCUGCCAGCAUGAUCUUAACUUUCCCUCUCCUAUGAUUUGUUGGGGUGAGAUCAGAUCAUGUGGCAGUUUCACCUAGUUGUUGGAAGCAUGAAU
pyr-891	UGAAGCUGCCAGCAUGAUCUUA	ptc-MIR167g	-38.90	0.97	DangsuA,DangsuB	CACUAUCAGUUGAAGCUGCCAGCAUGAUCUUAACCUCCCUCCUUUGUCGAGGAAAGAACAGAUCAUGUGGCAGUUUCACCUGAAGU
pyr-891	UGAAGCUGCCAGCAUGAUCUUA	ptc-MIR167f	-39.50	1.01	DangsuA,DangsuB	CUCUAUCAGUUGAAGCUGCCAGCAUGAUCUUAGCCUUCCUCCUUUGUUGAGGAAAGAAACAGAUCAUGUGGCAGUUUCACCUGUUGU
pyr-891	UGAAGCUGCCAGCAUGAUCUUA	mdm-MIR167j	-56.30	0.91	DangsuA,DangsuB	AGUGUGCAUAUGUUCUUAUCAUGCACUGGUAGCAGUUGAAGCUGCCAGCAUGAUCUUAUAACUCCCUACUUCGUUUAGGGAAGCUCAGAUCAUCUGGCAGUUUCACCUGUUGUUGGUAGCAUGAGACCAUCAAAACCCU
pyr-891	UGAAGCUGCCAGCAUGAUCUUA	tcc-MIR167c	-43.70	0.93	DangsuA,DangsuB	UAUGGUGCUCCACCAUCAGUUGAAGCUGCCAGCAUGAUCUUAAUUUUCCUUCUUUUUAUCAAGGAAAGAUCAGAUCAUAUGGCAGUUUCACCUGUUGCUGCUUGCACAAUCC
pyr-891	UGAAGCUGCCAGCAUGAUCUUA	lja-MIR167b	-50.40	1.01	DangsuA,DangsuB	UCAUGCACCACUACCAGUUGAAGCUGCCAGCAUGAUCUUAACUUCCCUCCAUGGUGGGGAAAGAUCAGAUCAUGUGGCAGUUUCACCUUGUUGUUGGUUGCAUGA
pyr-891	UGAAGCUGCCAGCAUGAUCUUA	mes-MIR167h	-32.30	1.04	DangsuA,DangsuB	UUGAAGCUGCCAGCAUGAUCUUAGCUUCUCUUCCUCGUUGAGAAAAGAUCAGAUCAUGUGGCAGUUUCAC
pyr-891	UGAAGCUGCCAGCAUGAUCUUA	gma-MIR167e	-46.90	0.87	DangsuA,DangsuB	UCAUGCACCACUACCAGUUGAAGCUGCCAGCAUGAUCUUAACUUCCCUCACUUGCCGUGGAAAGAUCAGAUCAUGUGGCAGUUUCACCUAGUAGUUGCUGGCCGCAUGA
pyr-891	UGAAGCUGCCAGCAUGAUCUUA	mes-MIR167g	-39.10	1.22	DangsuA,DangsuB	UGAAGCUGCCAGCAUGAUCUUAAUCUCCCUCCAUCGUUGAGGGAAGAUCAGAUCAUGUGGCAGUUUCA
pyr-891	UGAAGCUGCCAGCAUGAUCUUA	gma-MIR167f	-47.90	0.92	DangsuA,DangsuB	UCAUGCACCACUACCAGUUGAAGCUGCCAGCAUGAUCUUAACUUCCCUCACUUGCUGUGGAAAGAUCAGAUCAUGUGGCAGUUUCACCUAGUAGUUGUUGGCCGCAUGA
pyr-891	UGAAGCUGCCAGCAUGAUCUUA	ppe-MIR167d	-54.60	1.21	DangsuA,DangsuB	UCAUGCAUUUGUAGCAGUUGAAGCUGCCAGCAUGAUCUUAACCUCCCUAUUUUGGUUAGGGAAGAUCAGAUCAUGUGGCAGUUUCACCUGUUAUUGGUAGCAUGA
pyr-891	UGAAGCUGCCAGCAUGAUCUUA	cme-MIR167c	-41.60	0.92	DangsuA,DangsuB	CACUACCAGUUGAAGCUGCCAGCAUGAUCUUAACUUUUCUCUUCUACUUCUUCCUCUUCUUUCUUUGAGGAAAGAUCAGAUCAUGCGGCAGUUUCACCUGUUGUUG
pyr-1284	AGGCAGUGGCUUGGUUAAGGG	gma-MIR4995	-26.40	0.61	DangsuA,DangsuB	UAAAACUCAUAGGCAGUGGCUUGGUUAAGGGAAGCCACUGGAGCCGUAGUAAAAGCAAGUCUUCACCGGGCAAUUGUUUAUGGACCCGAA
pyr-401	UCUUCCCUAUUCCUCCCAUU	pta-MIR482c	-44.60	1.09	DangsuA,DangsuB	AGGAGUGGGAGGGUAGGAGAAGGCUCUGUGGUGAGGUCUCAGUCAUAAUCUCAUCAGUCUUCCCUAUUCCUCCCAUUCCU
pyr-401	UCUUCCCUAUUCCUCCCAUU	pab-MIR482b	-52.90	0.98	DangsuA,DangsuB	AUGUGGAUGGAAGUCUUGAGGAUUGGGAGGAUAGGAGAAGGCUGUUUGCUUAAUUCUCAGUUGAAACCUGAUUAGUCUUCCCUAUUCCUCCCAUUCCUAUUGCCUCCAUCACACAUCCCUU
pyr-401	UCUUCCCUAUUCCUCCCAUU	pde-MIR482b	-59.90	1.03	DangsuA,DangsuB	AUGUGGAUGGAAGUCUUGAGGAGUGGGAGGGUAGGAGAAGGCUCUGUGGUGAGGUUUCAGUCAUAAUCUCAUCAGUCUUCCCUAUUCCUCCCAUUCCUAUUGCCUCCCUUCACAAUGUAAC
pyr-3991	UUCCACAGGCUUUCUUGAACUG	osa-MIR396e	-72.00	0.76	DangsuA,DangsuB	GCGGGCAUGCUUUCCACAGGCUUUCUUGAACUGUGAACUCGUGGGGGUGUAUGUGCUCAUGUUGGGAUUGUGGUCGGUGGCCUCCAAUUCUCUGAAAAGAAAGCUGAAUUGUCGAGCUCCCCGUUCUGUCUUUGGUCGUCUCUACCUGUUGAUGGUUCAAGAAAGCCCAUGGAAACCAUGCCGC
pyr-3991	UUCCACAGGCUUUCUUGAACUG	zma-MIR396d	-18.80	0.43	DangsuA,DangsuB	CGGGCAUGCUUUCCACAGGCUUUCUUGAACUGUGAACUCGUGGGCGUGGUGGUGGUGGUGCUGGUGCUGGGUGU
pyr-3991	UUCCACAGGCUUUCUUGAACUG	bdi-MIR396b	-76.30	0.76	DangsuA,DangsuB	GGAGUAGUAAAAGAGAUGCGCGGGCAUGCUUUCCACAGGCUUUCUUGAACUGUGAACUCGUGGGGGUGUUCUCCUCUGAAUUGUGUCGUGGAAUUGCGGGCUUGUUCUUUAUCCGUCGAUCUCUCCGCCUGUUGAUGGUUCAAGAAAGCCCAUGGAAACCAUGCCGCCAUCUUGGUCUCGCGUCCCCGU
pyr-3991	UUCCACAGGCUUUCUUGAACUG	sbi-MIR396e	-85.90	0.84	DangsuA,DangsuB	UUUCCACAGGCUUUCUUGAACUGUGAACUCGUGGGGGUAGAAACCUUGCUGGGUUUGGUUCCCAUGUCGGAUGGAAUGCUUGGCUCCUCCCAGCGAUUCUUCCCCGGCCGUGAGUGAAUUGAAUUGCGGGGUUUCUCGCUUCGCUCGGCCGGCUCUACCUGUUGAUGGUUCAAGAAAGCCCAUGGAAAC
pyr-3991	UUCCACAGGCUUUCUUGAACUG	zma-MIR396c	-19.70	0.49	DangsuA,DangsuB	CGGGCAUGCUUUCCACAGGCUUUCUUGAACUGUGAACUCGUGGGUGGUGGUGGUAUGUCGGAUGGAAUGCUUGG
pyr-4695	UGGACUGAAGGGAGCUCCUUC	pvu-MIR319c	-187.70	0.67	DangsuA,DangsuB	AUUUUUUCCAUGGUCACUCUCAUUACAACCUGCUAGUCCUUUUUCGUCUUUACGGUUUUCCUUUCUUUAUAACUCUGCUUGCUACUCUUGCAUCUCUUCAGCGCAGGAAUCGAUAAAAACAUGCCAGAAUUAGGGUUUCUGGUAGCCAUGCUUUUCAGUUUUAGCUCUAAGGAAGAAGGGAAAAGGAUGUACAUGUGCAGAGUUCGACUACAGCUUUAGUCACAUUGGGAAGGAAAGAGAGUGAAGGAGCUUCCCUCAGCCCAUUCAUGGAUACAAAAGAUUGGGUUGCAAAAUUAACCACUAACUCAUUCACACAAUAGUAUUCAGUUAGGGUGAUGCUCUUUUUGCUAUAAUAUGAUUGUGUGAAUGAAGUGAUGCAUACAUAUUGUGUGACCCUCU…
pyr-4695	UGGACUGAAGGGAGCUCCUUC	ptc-MIR319f	-90.70	1.01	DangsuA,DangsuB	UAAUGGUGGGAGAGAGCUUCCUUCAGCCCACUCAUGGAUAGGAGAAAGGGGUUGAAUUAGCUGCCGACUCAUUCAUUCAAGCACCAGUAGAAAAAGGGGAAUGGAUAUUCUUUUGCUACUGUGAUUGUGUGAAUGAUGCGGGAGAUAAUUUUACAUCCCCUCUUUUUCUGUGCUUGGACUGAAGGGAGCUCCUUCCUUCUAU
pyr-4695	UGGACUGAAGGGAGCUCCUUC	ptc-MIR319g	-77.30	0.82	DangsuA,DangsuB	UAAUCGUGGGAGAGAGCUUCUUUCAGCCCACUCGUGGAUAGGACAAAGGGGUUGAACUAGCUGCCGACUCAUUCAUUCAAGCACUAGUAGAAAAAAAGGCGAACGGUGUUUCUUUUGCUACUGUGAUUGUGUGAAUGAUGCGGGAGAUAAUUUUCCAUCCUCUCCUUUUCUGUGCUUGGACUGAAGGGAGCUCCUUCCUUCUCU
pyr-4695	UGGACUGAAGGGAGCUCCUUC	aly-MIR319d	-100.40	1.08	DangsuA,DangsuB	AUAGAUAGAUAUAUGAAUCGAGAUUAAAAUAGAUAGAUAUAGAAGGAGAUUCUUUCAGUCCAGUCAUGGAUAGAAAAAGAAGAGGGUAGAAAUAUCUGCCGACUCAUCCAUCCAAACACUCGUGGUAGAGAAACGAUCAAUUUUAAACCGCAGUGACUGUAUGAAUGAUGCGGGAGAUAUUUUUGAUCCUUCUUUAUCUGUGUUUGGACUGAAGGGAGCUCCUUCUUUUUCUACAAUUUUUUCAUUUUUUUCUCAUCAUCUGUUUAU
pyr-4695	UGGACUGAAGGGAGCUCCUUC	aly-MIR319c	-97.10	1.06	DangsuA,DangsuB	AUAGAUAAAUAUAUGAAUCGAGAUUAAAAUAGAUAGAUAUAGAAGGAGAUUCUUUCAGUCCAGUCAUGGAUAGAAAAAGAAGAGGGUAGAAAUAUCUGCCGACUCAUCCAUCCAAACACUCGUGGUAGAGAAACGAUCAAUUUUAAACCGCAGUGACUGUAUGAAUGAUGCGGGAGAUAUUUUUGAUCCUUCUUUAUCUGUGUUUGGACUGAAGGGAGCUCCUUCUUUUUCUACAAUUUUUUCAUUUUUUUCUCAUUACCUGUUUAUAUAU
pyr-4695	UGGACUGAAGGGAGCUCCUUC	mes-MIR319g	-93.90	0.93	DangsuA,DangsuB	GAAUGUGGAAAUGGUGUGAGAGAGCUUCCUUCAGCCCACUCAUGGAUGGGGUAAAAGGGGCGGAAAUAUCUGCCGACUCAUUCAUUCAAGCACUAGUAGACAGAGAUACUGGUAAUACUGUGUUUAGCUACUGUGAUUGCGUGAAUGAUGCGGGAGAUAAUUUUGCAUCCCUCUUUUCUGUGCUUGGACUGAAGGGAGCUCCUUCCUUCUCUAUUACCUACAUUU
pyr-4695	UGGACUGAAGGGAGCUCCUUC	gma-MIR319q	-72.50	1.04	DangsuA,DangsuB	GAGAGUGAAGGAGUUUCCCUCAGCCCAUUCAUGGAUAUAAUGAAAGAUUGGGUUGCUGAAUUAACUGAUUCAUUCAUACAAUAGUAUUCAAUUAGGGUAAUAUUGUGUGAAUGAAGAGAGUAUAGUAUCUAUAUUGGAACCCCCUCUUUCUCUGUGCUUGGACUGAAGGGAGCUCCUUCUUUUU
pyr-4695	UGGACUGAAGGGAGCUCCUUC	ath-MIR319c	-85.90	1.09	DangsuA,DangsuB	UAGAUAUAGAAGGAGAUUCUUUCAGUCCAGUCAUGGAUAGAAAAAGAAGAGGGUAGAAAUAUCUGCCGACUCAUCCAUCCAAACACUCGUGGUAGAGAAACGAUAAAUUUAAACCGCAGUGACUGUGUGAAUGAUGCGGGAGAUAUUUUUGAUCCUUCUUUAUCUGUGUUUGGACUGAAGGGAGCUCCUUCUUUUUCUA
pyr-4695	UGGACUGAAGGGAGCUCCUUC	gma-MIR319l	-51.60	1.12	DangsuA,DangsuB	UGAAAGGUGCAGAAAUAGGAGUUCCCUUGCAGCCCAAAACACCCUGCAUGAACUACUUCAUGUUGUUUUGGACUGAAGGGAGCUCCUUCUUCUUCACUUUCA
pyr-4695	UGGACUGAAGGGAGCUCCUUC	gma-MIR319g	-83.80	1.07	DangsuA,DangsuB	GGGAAAGAGAGUGAAGGAGUUUCCCUCAGCCCAUUCAUGGAUAUAAUGAAAGAUUGGGUUGCUGAAUUAACUGAUUCAUUCAUACAAUAGUAUUCAAUUAGGGUAAUAUUGUGUGAAUGAAGAGAGUAUAGUAUCUAUAUUGGAACCCCCUCUUUCUCUGUGCUUGGACUGAAGGGAGCUCCUUCUUUUUCUGUUCCC
pyr-4695	UGGACUGAAGGGAGCUCCUUC	cme-MIR319d	-82.00	0.96	DangsuA,DangsuB	AUGUAGGAGCUCUCUUCGGUUCAUCUCGAGACAGGUGGAAGGUCGAAACGUUGCUGCUCAUUCGUUAGUUCAAUAGCUCAUUAUCCAUCAAAUCUCCAUAAUUUUUAUAUCAAAGUUGUGUGAUGUGCUCCUGAUCUAACGAUGUAGGAGCAAUCUUUGAUCAUCGUUGUCAUGUAUUGGACUGAAGGGAGCUCCUUCACUUUUACU
pyr-4695	UGGACUGAAGGGAGCUCCUUC	vun-MIR319b	-92.30	0.98	DangsuA,DangsuB	UUGGGAAGGAAAGAGAGUGAAGGAGCUUCCCUCAGCCCAUUCAUGGACACAGAAUAAGAUUGGGUUGCAAAAUUAACCACUAAUUGAUUCACACAAUAGUAUUGAGUUAGGGUGAUGCUGUUUUUGCUGUGAUAUGAUUGUGUGAAUGAAGUGGUGCAUAUAUAUUGUGACCCUCUUUCUCUGUGCUUGGACUGAAGGGAGCUCCUUCUUUCUGUUGCCUCCU
pyr-4695	UGGACUGAAGGGAGCUCCUUC	rco-MIR319d	-89.50	0.96	DangsuA,DangsuB	CCAAAGGAGCUCCUUUCAGUCCAAUAUGGAGGGCUUAGAAGCGGCAAAGAGCUGCCAUCUCAUGCAUUAAGGCAAUACUUGACAAGUUUUUCACAGUGAAAAUCUCAAGUUUGGCCUGGUGCAUGGUGUGGGAGCAACUCCUUCCCUCCUUCCCCCACCCAUUGGACUGAAGGGAGCUCCUUCUUUC
pyr-2502	AUUGGUUUGAAGGGAGCUCCA	zma-MIR159e	-56.00	0.63	DangsuA,DangsuB	GCAGCUCCUGCAGCAUCUGUUCGAGGCUCGCCGCGUUCUGAUGAUCCGGCAGCGCAAGUCCGGCGGCGACGGCGGCGGCCGAGGUCGGCGGCGCCGGCUGGCCGUAUUGGUUUGAAGGGAGCUCCAC
pyr-3195	UCGGACCAGGCUUCAUUCCCGU	csi-MIR166b	-67.90	0.87	DangsuA,DangsuB	CACGCGUCCGAUUGUUUGAUUUUUUUUGAGAGGUUAUGGUUGAUGGGAAUGUUGUUUGGCUCGAGGGUCAUCUAGGUUUUCAAAAUUUUCUCGGACUUUCUUUCUUGCUUUUAUUUUUCCAGGAAAAUUAUGUUAUUUGCCUAUGUGAUCUCGGACCAGGCUUCAUUCCCGUCAACCGACGGUUUCUCUCUU
pyr-3195	UCGGACCAGGCUUCAUUCCCGU	gra-MIR166c	-71.70	1.35	DangsuA,DangsuB	GAUGGGAAUGUUGUUUGGCUCGAGGUCAUAUAGGUUGAUCUUUUAUAUAUAAUUUCCAUGAAAUUUUCUUGGAUUUAUUUAAAUUUUCCGGGAAAGUUUCUGGAUAUGUGUAUAUAUAUAGCCUUAUAUGAUCUCGGACCAGGCUUCAUUCCCGU
pyr-3195	UCGGACCAGGCUUCAUUCCCGU	mes-MIR166h	-63.00	1.12	DangsuA,DangsuB	GGUUGAUGGGAAUGUUGUUUGGCUCGAGGCGAUAUAGGUUUGAUCUUUUAUCUUUGACUUCUGGGAUUAUUUUUUCUCGUGAAAAUUCAAAGAUAUAUAUAUAUAGCCCUAUGUAAUCUCGGACCAGGCUUCAUUCCCGUCAACC
pyr-3195	UCGGACCAGGCUUCAUUCCCGU	tcc-MIR166b	-71.20	1.05	DangsuA,DangsuB	AAAGGAGAAACGGUUGAUGGGAAUGUUGUUUGGCUCGAGGUCAUCUAGGUUGAUCUUUAUUUCCAUGAAAUUUUCUUGGAUUAAUUUCAUUUUUUUUUUCCGGGAAAGUUUCUGCAAUACAUAUAGCCCUAUAUGAUCUCGGACCAGGCUUCAUUCCCGUCAACCAAAACAACUUCCU
pyr-3195	UCGGACCAGGCUUCAUUCCCGU	cme-MIR166g	-44.60	0.99	DangsuA,DangsuB	UGAUGGGAAUGUUGUUUGGCUCGAGGUUCAUAUAUAUCAAACUAUAUCAAAUUUUUUGGAUAAAGAAAAAGGGUUGUUGUUGGAUUGUUAAAUAUAUAAUCUCGGACCAGGCUUCAUUCCCGUCAACCAA
pyr-3195	UCGGACCAGGCUUCAUUCCCGU	gma-MIR166j	-61.80	0.92	DangsuA,DangsuB	GGUUGAUGGGAAUGUUGUUUGGCUCGAGGUAACUAUGCAUGGUCUUAAUUUUGUUCAUCUUUGAAGCUUUAAUUUAUGGGUUUCGAUCUCUUUGAUCCCUUGAAACAAAGAAAGCUUUAAAGGUUGGAUUUUGAGGCUUUCUCGGACCAGGCUUCAUUCCCGUAAACC
pyr-3195	UCGGACCAGGCUUCAUUCCCGU	gma-MIR166h	-74.20	1.02	DangsuA,DangsuB	UGGGGAUGAUGGGAAUGUUGUUUGGCUCGAGGUAACUGCAUGGUCUUAAUUUUGUUCAUCUUUUGAAGCUUUAAUUUAUUUAUGGGUUUCAAUCUUUUUUGAUCCCUUGAAACAGAAAAAGCUUUAAAGGUUGGAUUUUGAGGCUAUCCCUUUAUGUGAUCUCGGACCAGGCUUCAUUCCCGUCAACCUU
pyr-3195	UCGGACCAGGCUUCAUUCCCGU	crt-MIR166a	-73.50	0.95	DangsuA,DangsuB	UUCCCUUCAGAAUCAAAUUCAUUGUUUGAUUUUUUUUGAGAGGUUAUGGUUGAUGGGAAUGUUGUUUGGCUCGAGGGUCAUCUAGGUUUUCAAAAUUUUCUCGGACUUUCUUUCUUGCUUUUAUUUUUCCAGGAAAAUUAUGUUAUUUGCCUAUGUGAUCUCGGACCAGGCUUCAUUCCCGUCAACCGACGGUUUCUCUCUU
pyr-4439	GGAAUCUUGAUGAUGCUGCAG	rco-MIR172	-51.37	0.89	DangsuA,DangsuB	CUGAUGGAGCAUCAUCAAGAUUCACAAACUUUAUCUAGGGCUAGUGGGUUGUUGUGGUCCCUUUUCUUUUUCUUUUUUUCUUUUUCUCUUGCUUCAAUCCAAUAGUCCCUUUGAUAUGGGAAUCUUGAUGAUGCUGCAGCGGCA
pyr-4439	GGAAUCUUGAUGAUGCUGCAG	ppe-MIR172d	-59.20	1.12	DangsuA,DangsuB	AGUCAUUGUUUGCGGAUGGAGCAUCAUCAAGAUUCACAAUUUCUUGGGGCUAGCUGCUUUGCUAUUGGCCCUUUGAUGAUAUGGGAAUCUUGAUGAUGCUGCAGCGGCAAUAAAUGGCU
pyr-4439	GGAAUCUUGAUGAUGCUGCAG	mes-MIR172f	-67.40	1.05	DangsuA,DangsuB	UUGCUGAUGGAGCAUCAUCAAGAUUCACACACUUUAUCCAGGGCUAGUGGAGUAGAAGUUUAUGGUGGCUUUUCUUGGUCGCUUUUGCUUCAAUCCAAACGGCCCUUUGAUAUGGGAAUCUUGAUGAUGCUGCAGCGGCAA
pyr-4439	GGAAUCUUGAUGAUGCUGCAG	mes-MIR172e	-77.70	0.98	DangsuA,DangsuB	AGUCACUGUUUGCCGAUGGAGCAUCAUCAAGAUUCACAAACUUUAUCUGGGGCUCGUGGGGGUGGAGAACUUGGUGAUAGUGGCUUUUGGUGUGGUCCCUUUUGCUUCAAUCCAAAUAGCCCUUUGAUAUGGGAAUCUUGAUGAUGCUGCAGCGGCAAUAAGUGGCU
pyr-4439	GGAAUCUUGAUGAUGCUGCAG	vvi-MIR172c	-54.30	0.82	DangsuA,DangsuB	GUUUGCGGAUGGAGCAUCAUCAAGAUUCACAAGUAUUGAGACUCAGUGCGUGGUGGUGAUGGUGACUUUUGUGGUCCCUUCCUACACUCCGAUGGCUCUUUGAUGUGGGAAUCUUGAUGAUGCUGCAGCGGCAAUAAA
pyr-4439	GGAAUCUUGAUGAUGCUGCAG	stu-MIR172d	-46.50	1.33	DangsuA,DangsuB	GGAGCAUCAUCAAGAUUCACAUAGCUAUAUUAGGGCUUUUAUAAUUUUUAAAAGCCCUAUGACGAUGUGUGGGAAUCUUGAUGAUGCUGCAG
pyr-4439	GGAAUCUUGAUGAUGCUGCAG	ptc-MIR172h	-55.80	0.89	DangsuA,DangsuB	CUGUUUGCCGAUGGAGCACCAUCAAGAUUCACAAACUUUAUUAGGGCUAAUAAGUGGUGAUGAUGGUGGCUUUUGGUGGUCCCUUCGUUUCAACCCAAUAGCCAUUUGAAUUGGGAAUCUUGAUGAUGCUGCAGCGGCAAUAA
pyr-4439	GGAAUCUUGAUGAUGCUGCAG	csi-MIR172c	-62.90	1.00	DangsuA,DangsuB	ACUGUUUGCAGUUGGAGCACCAUCAAGAUUCACAAACUAUUAGGGUUAGUGAGUGGAGAUAAUGGUGGCUAUUUUAUUUUUUUUGGCCCCUUGCUUCACUUCAAAUUGCUCUUUGUUUUGGAAUCUUGAUGAUGCUGCAGCAGCGAUAAGUGGCUAAAUUAUA
pyr-4439	GGAAUCUUGAUGAUGCUGCAG	ptc-MIR172g	-58.00	0.94	DangsuA,DangsuB	CUGUUUGCCUAUGGAGCAUCAUCAAGAUUCACAAGCUUUAUUAGGGCUAGUGUGUGGUGAUGAUGGUGGCUUUUGGUGGUCCCUUUUUUUCAAUCCAAUAGCCCUUUGAAUUGGGAAUCUUGAUGAUGCUGCAGCGGCAAUAA
pyr-4439	GGAAUCUUGAUGAUGCUGCAG	lus-MIR172e	-69.40	0.90	DangsuA,DangsuB	GGGUUCACAACAAUAACAGCCACUGCUUGCUAUUGGAGCAUCAUCAAGAUUCACAAACCCACAAAGGCAAAGUUAAAAUAAAAGAGCUUAUCUUUAUAAGCUUUUUUUUUUUCACUUUUGCCCAAAUCAUUCAUGGGCGGGGGUAUUGGGAAUCUUGAUGAUGCUGCAGCGGCAAUCACUGCCUACCU
pyr-4439	GGAAUCUUGAUGAUGCUGCAG	gma-MIR172c	-62.80	1.01	DangsuA,DangsuB	AAAUCAGUCACUGUUUGCCGGUGGAGCAUCAUCAAGAUUCACAAGCUUUAGGGGCAUUAAUUUGUUUGAGGUGGUUCCUUAUUGCUCCAAAACCAAUUAGCCCUUUUGCUAUGGGAAUCUUGAUGAUGCUGCAGCAGCAAUAAAUGACUAAUA
pyr-4439	GGAAUCUUGAUGAUGCUGCAG	tcc-MIR172a	-64.80	1.10	DangsuA,DangsuB	ACAGUCACUGUUUGCUGAUGGAGCAUCAUCAAGAUUCACAAAACUUUUUUUAGGGCUAAUGAUCAAUGGUGAAGAUCAUGCUUCACUAUACAAUCAGCCCUUUGAAUAUGUAUGGGAAUCUUGAUGAUGCUGCAGCGGCAAUAAAUGGCUAAAU
pyr-4439	GGAAUCUUGAUGAUGCUGCAG	cme-MIR172a	-53.70	0.81	DangsuA,DangsuB	UCCGACGGAGCAUCAUCAAGAUUCACAUGAAAUUUCAUUCGACUUCGCCGGAGAUUGAAGAAAUUUUAAAAAAUAUAAAAAGUUAAAAAAAGAAUCAGCAGUCGGCCUCGUGGGAGAUAUUGAUCUAAUUUCCAAUUGACAUGGGAAUCUUGAUGAUGCUGCAGCGGCAAUCAA
pyr-4439	GGAAUCUUGAUGAUGCUGCAG	lus-MIR172i	-52.60	0.82	DangsuA,DangsuB	AGCCACUGCUUGCUACUGGAGCAUCAUCAAGAUUCACAACCCCACCCACGGACUACCAAAAAGCUUUCAUCUUUUCAUCAUGACGUUGUGGGUAUUGGGAAUCUUGAUGAUGCUGCAGCGGCAAUCACUGCCU
pyr-4439	GGAAUCUUGAUGAUGCUGCAG	gma-MIR172e	-64.60	1.03	DangsuA,DangsuB	AAAACAGUCACUGUUUGCCGGUGGAGCAUCAUCAAGAUUCACAAGCUUUAGGGGGCAUUAAUUUGUUUGAGGUGGUCCCUUAUUGAUCCAAACCAAUUAGCCCUUUUGCUAUGGGAAUCUUGAUGAUGCUGCAGCAGCAAUAAAUGACUAAUA
pyr-4439	GGAAUCUUGAUGAUGCUGCAG	gma-MIR172d	-64.70	1.01	DangsuA,DangsuB	AAAACAGUCGCUGAUUGCAGAUGGAGCAUCAUCAAGAUUCACAAGCUUCAGGGGUUUUUUGUUUGGGGUGGUCCCUUAUUGCUCCCAAAUGAAUUAAGCCCUUUGAUAUGGGAAUCUUGAUGAUGCUGCAGCAGCAAUAAACGACUAACA
pyr-4345	UGGAGAAGCAGGGCACGUGCU	bdi-MIR164c	-79.30	0.88	DangsuA,DangsuB	AUGAUUUGAGGAGAGGGGGCGAGCAAACCUUGCUGGAGAAGCAGGGCACGUGCUUGACCGGUCGGCCGGAGCCGGGUUGCAGCAUGUGCGCUCCUUCUCCAGCAUGGCUUCUCGCCCCGUCGACCGGCGUUCGGCAGG
pyr-4345	UGGAGAAGCAGGGCACGUGCU	ata-MIR164a	-49.60	0.90	DangsuA,DangsuB	CGAACGGUGCUGGAGAAGCAGGGCACGUGCUCGAUCCAUCGACCCAAAGCGGUUGCAGCACGUGCGCUCCUUCUCCAGCAUGGCUUCUC
pyr-4345	UGGAGAAGCAGGGCACGUGCU	sbi-MIR164b	-72.10	0.99	DangsuA,DangsuB	GAGGGGCGAGCAAACCGUGCUGGAGAAGCAGGGCACGUGCUCGUCGUCGCUGCAUGCGUGGUCGUCGUCGCAGCACGUGCGCUCCUUCUCCAACAUGGCUUCUCGCCCCCA
pyr-4345	UGGAGAAGCAGGGCACGUGCU	cme-MIR164a	-20.30	0.60	DangsuA,DangsuB	AUGAAGAGCAAGAUGGAGAAGCAGGGCACGUGCUUUACUAACUCAGUUCCAAUUCAAAAAUCCCUUCUUUUCUUUUUCUUUCUCUUUUUCU
pyr-4345	UGGAGAAGCAGGGCACGUGCU	osa-MIR164d	-62.20	0.97	DangsuA,DangsuB	CAAACCGUGCUGGAGAAGCAGGGCACGUGCUCGACGGCGGGGCUGGCUGGCCGGCCGGCUUGCAGCAUGUGCGCUCCUUCUCCAGCAUGGCUUC
pyr-4345	UGGAGAAGCAGGGCACGUGCU	zma-MIR164f	-57.70	0.84	DangsuA,DangsuB	CUGGAGAAGCAGGGCACGUGCUCGCCGACAAGUCGAAGCCUUAGGGCAGCUUGGCCUGUGGCUGCACGCGUACGUGGUCGUCGCAGCACGUGCGCUCCUUCUCCAACA
pyr-4340	GUGAGCCGAACCAAUAUCACU	osa-MIR171h	-43.50	1.04	DangsuA,DangsuB	AGAAGAAGAGGACAUGGUUUGGUAUUGUUUCGGCUCAUGUCGUUCACACAGAUGUGAGCCGAACCAAUAUCACUCAUGUAUUCUUCAUUCAGAGAACUUCU
pyr-4340	GUGAGCCGAACCAAUAUCACU	zma-MIR171k	-50.60	1.05	DangsuA,DangsuB	GGGAGGAAGAAGACGACAUGGCGUGGUAUUGUUUCGGCUCAUGUCCUUCUUGACUGGAUGUGAUGUGAGCCGAACCAAUAUCACUCAUGUAUUCUUCAUUCUGA
pyr-4340	GUGAGCCGAACCAAUAUCACU	zma-MIR171h	-57.30	0.94	DangsuA,DangsuB	GGGAGGAAGGAGACGACAUGGCGUGGUAUUGUUUCGGCUCAUGUCCUUCUUCGAUCGAGUCUUGCCGUUGGAUUUGGAUGUGAUGUGAGCCGAACCAAUAUCACUCAUGUACUCUUCAUUCCCA
pyr-4340	GUGAGCCGAACCAAUAUCACU	sbi-MIR171e	-55.10	0.97	DangsuA,DangsuB	AGGAGGAAGAAGACGACAUGGCGUGGUAUUGUUUCGGCUCAUGUCCUUCUUGCUUCGAGUCUGUCGUCGGAUUUUGGAUGUGAUGUGAGCCGAACCAAUAUCACUCAUGUAUUCUUCAUUCUGA
pyr-4340	GUGAGCCGAACCAAUAUCACU	ata-MIR171a	-42.10	0.96	DangsuA,DangsuB	GACGACAUGCUGGUAUUGUUUCGGCUCAUGUCCUCGUCGAGCACAUCGUCGGAUGAGAUGUGAGCCGAACCAAUAUCACUCAUGUAUUCUU
pyr-4435	UGGAGAAGCAGGGUACGUGCA	cca-MIR164	-39.50	1.01	DangsuA,DangsuB	CUUUGUUGGAGAAGCAGGGUACGUGCAACGAUAGAAACGACGAGUUGUUGUUUAUUGCACGUGCUCUACCUCUCCAACGUAGA
pyr-4435	UGGAGAAGCAGGGUACGUGCA	osa-MIR164c	-55.70	0.90	DangsuA,DangsuB	AGGUUCUUGUUGGAGAAGCAGGGUACGUGCAAAAUGCACACCGGUUGGUCGAGCUAAUUAACAAGCUCUGACGACCAUGGUGAUCGAAUGCACGUGCUCCCCUUCUCCACCAUGGCCUU
pyr-2375	UUCCACAGCUUUCUUGAACUGU	csi-MIR396a	-54.10	0.89	DangsuA,DangsuB	CGAAGGUCCUCUUUGUGAUCUUCCACAGCUUUCUUGAACUGUCUUGAAUUUUCCGAUCGAUACCGGUGCAUGAUUAAUUCCCAACACAAUUCAAGAAAGCUGUGGAAAACUACUAAGAGGAUUUGGUCAUCAAUCUCUCUUUUGAUAGAGAUC
pyr-2375	UUCCACAGCUUUCUUGAACUGU	gma-MIR396h	-56.10	0.97	DangsuA,DangsuB	GAAUGGUCUUUUUCGUGAUCUUCCACAGCUUUCUUGAACUGUGUUGUGUGAGGUUUCUCCAAGUGAAGGUUUAAGAUCCCUUAUGCAACAUAAAUUCUUUGAGCACAAUUCAAGAUAGCUGUGGAAAAUCACUGAGAUGAUCUCGUUC
pyr-2375	UUCCACAGCUUUCUUGAACUGU	vvi-MIR396c	-46.90	0.98	DangsuA,DangsuB	UUCUGUGAUCUUCCACAGCUUUCUUGAACUGUUUUGGAAGCCUUCCACUUCCAUGCAAUGGAGGAGUUCAACCAACAGCUCAGGAAAGUUGUGGAACAUUACUGAGAG
pyr-2375	UUCCACAGCUUUCUUGAACUGU	tcc-MIR396a	-68.20	1.10	DangsuA,DangsuB	CCGAGGUUCUCUUUGUGAUUUUCCACAGCUUUCUUGAACUGUGUCGAGAAAAUCUGCAUUCCCAUGCAAUGGUAUACAUACAACAUUCGGCACCGGGAAAACACAGUUCAUGAGAGCUGUGGAAAAUUACUGAGAGGAUCUUCUUU
pyr-2375	UUCCACAGCUUUCUUGAACUGU	gma-MIR396e	-44.70	0.99	DangsuA,DangsuB	GUGAUCUUCCACAGCUUUCUUGAACUGUGUUGUGAGGCUUCUCUCCAAUGAAGGUUUAUACCCUAUGCAAAAGAAAUUCUAUGAGCACAAUUCAAGAUAGCUGUGGAAAAUCAC
pyr-3287	UUUGGGAUCAUGCUAUCCCUU	gma-MIR393d	-49.40	1.07	DangsuA,DangsuB	CUAGAGGAGGCAUCCAAAGGGAUCGCAUUGAUCCCAAAUCCAAGCUUCAAUGUUCUUCUAUCUUUCUCACUCAAAAUAUUAAUUUUAUUUGGGAUCAUGCUAUCCCUUUGGAUUUCUCCUUUA
pyr-3287	UUUGGGAUCAUGCUAUCCCUU	gma-MIR393e	-57.00	1.02	DangsuA,DangsuB	GGAGGAGGCAUCCAAAGGGAUCGCAUUGAUCCCAAAUUUCAGAUUUAUAAAUUUGUCUUUCUCUUCCCUUGUCAAUAUUUGGGAUCAUUUCUCUUCCCUUCUCAAUAUUUGGGAUCAUGCUAUCCCUUUGGAUUCCUCCUU
pyr-3287	UUUGGGAUCAUGCUAUCCCUU	gma-MIR393f	-50.10	1.14	DangsuA,DangsuB	GGAGGAGGCAUCCAAAGGGAUCGCAUUGAUCCCAAAUCCAAGCUUUAAUAUUUUUCUCUCUUCUCACUCAAUAAUAUUAAUUUAUUUGGGAUCAUGCUAUCCCUUUGGAUUUCUCCUU
pyr-3287	UUUGGGAUCAUGCUAUCCCUU	gma-MIR393g	-55.00	1.15	DangsuA,DangsuB	AGAGGAGGCAUCCAAAGGGAUCGCAUUGAUCCCAAAUCCAAGCUUCAAUGUUCUUCUCUCUUUCUCACUCAAAAUGUUAAUUUUAUUUGGGAUCAUGCUAUCCCUUUGGAUGUCUCCUU
pyr-3287	UUUGGGAUCAUGCUAUCCCUU	mtr-MIR393b	-41.60	1.01	DangsuA,DangsuB	AGGCAUCCAAAGGGAUCGCAUUGAUCCCAAAUCUAAUUAAGUCCCUAGCUACUUAAUUAACAACUUAAUUUCCUUAAUAUCUCAUAAUAUUUGGGAUCAUGCUAUCCCUUUGGAUUCAU
pyr-3287	UUUGGGAUCAUGCUAUCCCUU	gma-MIR393a	-47.90	1.02	DangsuA,DangsuB	GGAGGAGGCAUCCAAAGGGAUCGCAUUGAUCCCAAAUCCAAGCUUCAAUAUUCUUCUCUCUUUCCCACUCAAAAUAUUAAUUUUAUUUGGGAUCAUGCUAUCCCUUUGGAUUUCUCCUUU
pyr-3287	UUUGGGAUCAUGCUAUCCCUU	gma-MIR393c	-51.70	1.10	DangsuA,DangsuB	GGAGGAGGCAUCCAAAGGGAUCGCAUUGAUCCCAAAUUUCAGAUUUAUAAAUUUUUCUCUUUCCCUCCCCUUCUCAAUAUUUGGGAUCAUGCUAUCCCUUUGGAUUCCUCCUU
pyr-4231	UUGGACCAGGCUUCAUUCCCC	mes-MIR166i	-42.90	0.81	DangsuA,DangsuB	AUGGUUGUUUUUGAAGGGAAUGUUGGCUGGCUCUAGGCAUUCACAAGUGUGGGAGAAGAAAUCGAUCAGAAGCAGUGGAAGCUUUGGACCAGGCUUCAUUCCCCUCAAUAUAAUUACCAU
pyr-2578	UUCGUUGUCUGUUCGACCUUG	aly-MIR858	-236.10	0.76	DangsuA,DangsuB	AGAGUGAUUGGAUUCGAUGCUAGGCUUGACAAAGUGAGCAAUCUUAUGUGUUCUCAUCUUUGUUUCGUUGUCUGUUCGACCUUGGUCUCGAUCUCUCCUUAAAACCCUAAUACGUUAUCGUUUAUUUCAUUCAUCUAUCCUUCUUAUGAUCAUCAUACAUGGUAUCGGUUUAUGAUUGAUGGGGUAGAUAGAUGAUCGAAACUUUUGAUUUCUGAGGCUUUUUUUUUUUUUUUAAACAUUUAGUAUACCAGAUAUUACUAGUACACACAUACAUACUGACACGAUAGUCUAUUUGAUGAUUAAGUCUUUACGUUCGUAUACAUACGGAUUUCCCUUUCUUUUGCAUAAAAUCUUAGAUUAUCGUAGGCAUGCGGAUUUACAAUAAGAAAGAUGAUUGUC…
pyr-2578	UUCGUUGUCUGUUCGACCUUG	ath-MIR858a	-45.60	0.62	DangsuA,DangsuB	CUCAUCUUUGUUUCGUUGUCUGUUCGACCUUGGUCUCGAUCUCUCCUCAAAACCCUAAUACGCGCUUUAUCGUUUAUUUCAUUCAUCCAUCCUUCUUAUGAUCAUCAUAAACUAACGUACAUGGUUUAUCGGUUUGUUAUUGAUGGGGAUUGGGGUAGAUAGACGAUCGAAACUUUUGAUUUCUGAG
pyr-2578	UUCGUUGUCUGUUCGACCUUG	ath-MIR858b	-67.90	0.56	DangsuA,DangsuB	CCUACCCGAAGGGUUUUGGAGAGUAGACAAAGAGACAAACAUAGAGGUGUGAGUUUGGUUUGGUUUUGGGUUUUGGGGGGUUGGUAGUGUUUGAGGUCCAUAUGCCUCGAUCUUCCGCUUCUAUUAAUUAAUUUUCUCUAUUAGAAAUAUUAUCUAAUUAUUCCACUCCAUCGAACCAUGCACAUAUAUAAUGAUAUGUAUAAGCCCAUCAAAGUUUUUGAAUUCAGUGCAAACACUUGUCAAAGGAGCAGUCCCGAUCUGGUUCCAUCUUAUCUUCGUUGUCUGUUCGACCUUGGCUUUGGC
pyr-3385	UAGCCAAGGACGACUUGCCUA	ptc-MIR169u	-56.20	0.95	DangsuA,DangsuB	GAGGGUUGGGUAGCCAAGGACGACUUGCCUAUUUCCUCCAUGGGGUCCUGAAAAGAAUGAAAUACUGUCGUUCAGAGCUCAUUGGUAGGGUUCAUAGGCAGUCUCCUUUGGCUAUCCUAACU
pyr-2487	UCCCACAGCUUUAUUGAACUG	zma-MIR396g	-48.40	0.90	DangsuA,DangsuB	UUCCCACAGCUUUAUUGAACUGCCCUCUUGCUUGCUUGGAUCAAUUGAAACUCGAUCAGGUCCACAGCACAGCCUGCUGCAUGCAUGAUGCAGUUCAAGAAAGCUGUGGAAGAU
pyr-2487	UCCCACAGCUUUAUUGAACUG	lus-MIR396d	-50.60	0.95	DangsuA,DangsuB	UGGCUUUCUGAGGGUAUCUUCCCACAGCUUUAUUGAACUGCUGCUUCUACUGCAUCAGAGAUCUCUGGUUUAGCCAUGCAGUUCAAGAAAGCUGUGGAAGAAUACAAGCAGAGCCA
pyr-2487	UCCCACAGCUUUAUUGAACUG	cca-MIR396b	-43.50	1.04	DangsuA,DangsuB	CUAUCUUCCCACAGCUUUAUUGAACUGCAAAGGUUUAAGUACAAAAAAAAGGACAGAUCCAACAGAUCAACAUUGAACCAUGCAGUUCAAGAAAGCUGUGGAAGAACAGA
pyr-2487	UCCCACAGCUUUAUUGAACUG	zma-MIR396h	-54.80	0.88	DangsuA,DangsuB	UUCCCACAGCUUUAUUGAACUGCAUGCACCUGCUGAUGCGGGUGGAGGAGUUGAAGCUGCCGCUCCUCUGAGAGAUGCAGUUCAAGAAAGCUGUGGAAGAUCACAAAGAAGGCCAUCUGAUUAC
pyr-2481	GGAGCAUCAUCAAGAUUCACA	ath-MIR172c	-54.90	1.12	DangsuA,DangsuB	AGCUACUGUUCGCUGUUGGAGCAUCAUCAAGAUUCACAAAUCAUCAAGUAUUCGUGUAAAUAAACCCAUUUAUGAUUAGAUUUUUGAUGUAUGUAUGAGAAUCUUGAUGAUGCUGCAGCUGCAAUCAGUGGCU
pyr-2481	GGAGCAUCAUCAAGAUUCACA	mes-MIR172f	-67.40	1.05	DangsuA,DangsuB	UUGCUGAUGGAGCAUCAUCAAGAUUCACACACUUUAUCCAGGGCUAGUGGAGUAGAAGUUUAUGGUGGCUUUUCUUGGUCGCUUUUGCUUCAAUCCAAACGGCCCUUUGAUAUGGGAAUCUUGAUGAUGCUGCAGCGGCAA
pyr-2481	GGAGCAUCAUCAAGAUUCACA	mes-MIR172e	-77.70	0.98	DangsuA,DangsuB	AGUCACUGUUUGCCGAUGGAGCAUCAUCAAGAUUCACAAACUUUAUCUGGGGCUCGUGGGGGUGGAGAACUUGGUGAUAGUGGCUUUUGGUGUGGUCCCUUUUGCUUCAAUCCAAAUAGCCCUUUGAUAUGGGAAUCUUGAUGAUGCUGCAGCGGCAAUAAGUGGCU
pyr-2481	GGAGCAUCAUCAAGAUUCACA	vvi-MIR172c	-54.30	0.82	DangsuA,DangsuB	GUUUGCGGAUGGAGCAUCAUCAAGAUUCACAAGUAUUGAGACUCAGUGCGUGGUGGUGAUGGUGACUUUUGUGGUCCCUUCCUACACUCCGAUGGCUCUUUGAUGUGGGAAUCUUGAUGAUGCUGCAGCGGCAAUAAA
pyr-2481	GGAGCAUCAUCAAGAUUCACA	aly-MIR172f	-59.70	1.22	DangsuA,DangsuB	AGCUACUGUUCGCUGUUGGAGCAUCAUCAAGAUUCACAAAUCAUCAAGUAUUCGUGUAAAUGAACCCAUUUAUAAUUAUAUUGUUGAUGUAUGUAUGAGAAUCUUGAUGAUGCUGCAGCUGCAAUCAGUGGCU
pyr-2481	GGAGCAUCAUCAAGAUUCACA	tcc-MIR172a	-64.80	1.10	DangsuA,DangsuB	ACAGUCACUGUUUGCUGAUGGAGCAUCAUCAAGAUUCACAAAACUUUUUUUAGGGCUAAUGAUCAAUGGUGAAGAUCAUGCUUCACUAUACAAUCAGCCCUUUGAAUAUGUAUGGGAAUCUUGAUGAUGCUGCAGCGGCAAUAAAUGGCUAAAU
pyr-2481	GGAGCAUCAUCAAGAUUCACA	ptc-MIR172b	-54.90	0.95	DangsuA,DangsuB	UUGUUUGCGGGUGGAGCAUCAUCAAGAUUCACAUGCAAAUGCACGGCCGGUGAUGUUAAGAGUUAAAUCUUUCUUUGUUUCUGUUCAUCUGCCAAAGUUCUUUGGAAGUGAGAAUCUUGAUGAUGCUGCAUCGGCAAUAA
pyr-2481	GGAGCAUCAUCAAGAUUCACA	aly-MIR172c	-59.70	1.22	DangsuA,DangsuB	AGCUACUGUUCGCUGUUGGAGCAUCAUCAAGAUUCACAAAUCAUCAAGUAUUCGUGUAAAUGAACCCAUUUAUAAUUAUAUUGUUGAUGUAUGUAUGAGAAUCUUGAUGAUGCUGCAGCUGCAAUCAGUGGCU
pyr-2481	GGAGCAUCAUCAAGAUUCACA	ptc-MIR172g	-58.00	0.94	DangsuA,DangsuB	CUGUUUGCCUAUGGAGCAUCAUCAAGAUUCACAAGCUUUAUUAGGGCUAGUGUGUGGUGAUGAUGGUGGCUUUUGGUGGUCCCUUUUUUUCAAUCCAAUAGCCCUUUGAAUUGGGAAUCUUGAUGAUGCUGCAGCGGCAAUAA
pyr-2481	GGAGCAUCAUCAAGAUUCACA	stu-MIR172d	-46.50	1.33	DangsuA,DangsuB	GGAGCAUCAUCAAGAUUCACAUAGCUAUAUUAGGGCUUUUAUAAUUUUUAAAAGCCCUAUGACGAUGUGUGGGAAUCUUGAUGAUGCUGCAG
pyr-2481	GGAGCAUCAUCAAGAUUCACA	cme-MIR172a	-53.70	0.81	DangsuA,DangsuB	UCCGACGGAGCAUCAUCAAGAUUCACAUGAAAUUUCAUUCGACUUCGCCGGAGAUUGAAGAAAUUUUAAAAAAUAUAAAAAGUUAAAAAAAGAAUCAGCAGUCGGCCUCGUGGGAGAUAUUGAUCUAAUUUCCAAUUGACAUGGGAAUCUUGAUGAUGCUGCAGCGGCAAUCAA
pyr-2481	GGAGCAUCAUCAAGAUUCACA	mdm-MIR172n	-49.00	1.07	DangsuA,DangsuB	GGUCACUUUUUGCGGGUGGAGCAUCAUCAAGAUUCACAAUCUUACUUGGGUUCUAGUUUUAACCCCAUUUGAUGAUAUGAGAAUCUUGAUGAUGCUGCAGCAGCAAUAAAUGACU
pyr-2481	GGAGCAUCAUCAAGAUUCACA	rco-MIR172	-51.37	0.89	DangsuA,DangsuB	CUGAUGGAGCAUCAUCAAGAUUCACAAACUUUAUCUAGGGCUAGUGGGUUGUUGUGGUCCCUUUUCUUUUUCUUUUUUUCUUUUUCUCUUGCUUCAAUCCAAUAGUCCCUUUGAUAUGGGAAUCUUGAUGAUGCUGCAGCGGCA
pyr-2481	GGAGCAUCAUCAAGAUUCACA	mdm-MIR172c	-49.00	1.07	DangsuA,DangsuB	GGUCACUUUUUGCGGGUGGAGCAUCAUCAAGAUUCACAAUCUUACUUGGGUUCUAGUUUUAACCCCAUUUGAUGAUAUGAGAAUCUUGAUGAUGCUGCAGCAGCAAUAAAUGACU
pyr-2481	GGAGCAUCAUCAAGAUUCACA	lus-MIR172g	-59.50	1.14	DangsuA,DangsuB	AUUAACAGCCAUAGUUUGCUGAUGGAGCAUCAUCAAGAUUCACAGAUCUAGCUGUGGUACUAUUAUAGUUGGCUAGUAGAGAAAACUUGGGAAUCUUGAUGAUGCUGCAUCGGCAAUCAAUGGCUUAGU
pyr-2481	GGAGCAUCAUCAAGAUUCACA	lus-MIR172e	-69.40	0.90	DangsuA,DangsuB	GGGUUCACAACAAUAACAGCCACUGCUUGCUAUUGGAGCAUCAUCAAGAUUCACAAACCCACAAAGGCAAAGUUAAAAUAAAAGAGCUUAUCUUUAUAAGCUUUUUUUUUUUCACUUUUGCCCAAAUCAUUCAUGGGCGGGGGUAUUGGGAAUCUUGAUGAUGCUGCAGCGGCAAUCACUGCCUACCU
pyr-2481	GGAGCAUCAUCAAGAUUCACA	mtr-MIR172d	-52.30	1.11	DangsuA,DangsuB	AGUCAGUGUUUGCUAGUGGAGCAUCAUCAAGAUUCACAAGCUUUAUAGGGCUUCAAAUCAAUUAGCCCUUCUUCAUGUUAUGAGAAUCUUGAUGAUGCUGCAGCAGCAAUUGAUGACU
pyr-2481	GGAGCAUCAUCAAGAUUCACA	lus-MIR172i	-52.60	0.82	DangsuA,DangsuB	AGCCACUGCUUGCUACUGGAGCAUCAUCAAGAUUCACAACCCCACCCACGGACUACCAAAAAGCUUUCAUCUUUUCAUCAUGACGUUGUGGGUAUUGGGAAUCUUGAUGAUGCUGCAGCGGCAAUCACUGCCU
pyr-2481	GGAGCAUCAUCAAGAUUCACA	lja-MIR172a	-61.20	1.15	DangsuA,DangsuB	GCUGGUGGAGCAUCAUCAAGAUUCACAAGCUUUAAGGGGUGGAUUGUGUUUGGGGUGGUCCCUAAUUGCUCCAUAUCAAUUUGCUCUUUGAUUUGAGAAUCUUGAUGAUGCUGCAGUAGC
pyr-2481	GGAGCAUCAUCAAGAUUCACA	ghr-MIR172	-56.30	1.20	DangsuA,DangsuB	AGUCACUGUUUGCUGUUGGAGCAUCAUCAAGAUUCACAAUUUUAGGGUUCUUUUUUGAUUGAUUUGAUCAAUCAGCCUUUUUAUGAUUGAGAAUCCUGAUGAUGCUGCAGUGGCAAUAAGUGGCU
pyr-2481	GGAGCAUCAUCAAGAUUCACA	gma-MIR172c	-62.80	1.01	DangsuA,DangsuB	AAAUCAGUCACUGUUUGCCGGUGGAGCAUCAUCAAGAUUCACAAGCUUUAGGGGCAUUAAUUUGUUUGAGGUGGUUCCUUAUUGCUCCAAAACCAAUUAGCCCUUUUGCUAUGGGAAUCUUGAUGAUGCUGCAGCAGCAAUAAAUGACUAAUA
pyr-2481	GGAGCAUCAUCAAGAUUCACA	ppe-MIR172d	-59.20	1.12	DangsuA,DangsuB	AGUCAUUGUUUGCGGAUGGAGCAUCAUCAAGAUUCACAAUUUCUUGGGGCUAGCUGCUUUGCUAUUGGCCCUUUGAUGAUAUGGGAAUCUUGAUGAUGCUGCAGCGGCAAUAAAUGGCU
pyr-2481	GGAGCAUCAUCAAGAUUCACA	gma-MIR172e	-64.60	1.03	DangsuA,DangsuB	AAAACAGUCACUGUUUGCCGGUGGAGCAUCAUCAAGAUUCACAAGCUUUAGGGGGCAUUAAUUUGUUUGAGGUGGUCCCUUAUUGAUCCAAACCAAUUAGCCCUUUUGCUAUGGGAAUCUUGAUGAUGCUGCAGCAGCAAUAAAUGACUAAUA
pyr-2481	GGAGCAUCAUCAAGAUUCACA	gma-MIR172d	-64.70	1.01	DangsuA,DangsuB	AAAACAGUCGCUGAUUGCAGAUGGAGCAUCAUCAAGAUUCACAAGCUUCAGGGGUUUUUUGUUUGGGGUGGUCCCUUAUUGCUCCCAAAUGAAUUAAGCCCUUUGAUAUGGGAAUCUUGAUGAUGCUGCAGCAGCAAUAAACGACUAACA
pyr-661	CUGAAGUGUUUGGGGGAACUCC	vvi-MIR395g	-43.00	1.00	DangsuA,DangsuB	GUCCCCUAGAGUUCCCCUGAGCACUUCAUUGGGGAUCCUUAGUUUUCAAUUCCUACUGAAGUGUUUGGGGGAACUCCCGGUGUCAU
pyr-661	CUGAAGUGUUUGGGGGAACUCC	tcc-MIR395a	-56.70	0.91	DangsuA,DangsuB	AGAGAGUCAGCUGUCCUCUGGAGUUCCCCUGACCACUUCACUAGAGGUUUCCUGGACCCUUAAUAGGAAGAAACCUGACCUACUGAAGUGUUUGGGGGAACUCCUGUUGGCACCUGACAAUGU
pyr-661	CUGAAGUGUUUGGGGGAACUCC	vvi-MIR395l	-40.10	0.87	DangsuA,DangsuB	GCCCCCUAGAGUUCCCCUGACCACUUCACUGGGGGAUCUUCUGUAAUGACUUCCUACUGAAGUGUUUGGGGGAACUCCUGGUGUCAU
pyr-661	CUGAAGUGUUUGGGGGAACUCC	atr-MIR395	-63.70	0.90	DangsuA,DangsuB	GCAUUGGGAGACCCCUAGAGUUCCCUCAACCCCUUCAGCGAUGUGCUCUCUCCUAUACAAGAGAGAGAGAGAGUUUAUGCUGGUGUUUUGGAGAGAGAGUUUACGCUGAAGUGUUUGGGGGAACUCCUGGAGUCACUCAAUAGU
pyr-661	CUGAAGUGUUUGGGGGAACUCC	gma-MIR395b	-37.80	1.02	DangsuA,DangsuB	UCCCUAGAGUUUCCCUGAACACUUCAUUAAAGGGCUUUAUUGAAAUAUAAUCCAAAGUUAGUCUAUACUGAAGUGUUUGGGGGAACUCCUGGUGA
pyr-661	CUGAAGUGUUUGGGGGAACUCC	gma-MIR395c	-37.30	0.93	DangsuA,DangsuB	CCUAGAGUUCCCCUUAAUGCUUCAUUGAGGAUUCUGUUUAGGUCCAAUUUAACUAGUCCCUACUGAAGUGUUUGGGGGAACUCCGGG
pyr-661	CUGAAGUGUUUGGGGGAACUCC	mes-MIR395d	-57.80	1.01	DangsuA,DangsuB	GUCAGGUGUCUCCUGGAGUUCCCCUGAUCACUUCACUGGGGUGGGCUACAGUUUCCAGGAAACCCUACUGAAGUGUUUGGGGGAACUCCGGUGGCCAUUUGAC
pyr-661	CUGAAGUGUUUGGGGGAACUCC	gma-MIR395a	-46.70	0.97	DangsuA,DangsuB	UCAGGUUUUCCCUAGAGUUCCCCUGAACGCUUCAUUAAAGGGCUUUAUUAUCAUAUAGUCCCAAGUUAGUCCAUACUGAAGUGUUUGGGGGAACUCCCGGUGAUACUUGA
pyr-661	CUGAAGUGUUUGGGGGAACUCC	vvi-MIR395b	-34.40	0.75	DangsuA,DangsuB	GUCCCCUAGAGUUCCCCUUACCACUUCACUGGGGAUCUUCUCUAAUGAAUGCCUACGUACUGAAGUGUUUGGGGGAACUCCUGGUGCCAU
pyr-661	CUGAAGUGUUUGGGGGAACUCC	mes-MIR395c	-47.00	1.07	DangsuA,DangsuB	AUCAAGUGUCCCCUAGAGUUCUCCUGAUCACUUCAUUGUAGACUCAAUAAGGAGUAGUUGUUUGCACUGAAGUGUUUGGGGGAACUCCUGGUGUCAUUUGAU
pyr-661	CUGAAGUGUUUGGGGGAACUCC	vvi-MIR395a	-39.50	0.88	DangsuA,DangsuB	GUCCCCUAGAGUUCCCUUGAUCACUUCACUAGGGAGCUUCGCUAGUUUUAAUGACUUCCUACUGAAGUGUUUGGGGGAACUCCUGGUACCGA
pyr-661	CUGAAGUGUUUGGGGGAACUCC	ath-MIR395d	-41.90	1.05	DangsuA,DangsuB	AUGUCCUCUAGAGUUCUCCUGAACACUUCAUUGGAAAUUUGUUAUUCAGUAAGCUAACAGUUAAUUCCACUGAAGUGUUUGGGGGAACUCCCGAUGUCAU
pyr-661	CUGAAGUGUUUGGGGGAACUCC	ath-MIR395e	-39.10	1.09	DangsuA,DangsuB	AUGUUUUCUAGAGUUCCUCUGAGCACUUCAUUGGAGAUACAAUUUUUUAUAAAAUAGUUUUCUACUGAAGUGUUUGGGGGAACUCCCGGGCUGAU
pyr-661	CUGAAGUGUUUGGGGGAACUCC	vvi-MIR395j	-40.10	0.91	DangsuA,DangsuB	GCCCCCUAGAGUUCCCCUGACCACUUCACUGGGGAUCUUCUUUAAUGACUUCCUACUGAAGUGUUUGGGGGAACUCCUGGUGUCAU
pyr-661	CUGAAGUGUUUGGGGGAACUCC	ptc-MIR395j	-43.00	0.86	DangsuA,DangsuB	GUGUCCCCUAGAGUUCCUCUGAGCACUUCAUUGGGGAUCUUCCAUCGACCUGAGAGAGUAUUAUCAUUCCUACUGAAGUGUUUGGGGGAACUCCUGGUGUCA
pyr-661	CUGAAGUGUUUGGGGGAACUCC	vvi-MIR395h	-36.00	0.82	DangsuA,DangsuB	GUCCCCUAGAGUUCCCUUGACCACUUCACUGGGGACCUUCUCUAAUUAUAAUGACUUCCUACUGAAGUGUUUGGGGGAACUCCUGGUGCUAU
pyr-661	CUGAAGUGUUUGGGGGAACUCC	ath-MIR395a	-41.00	1.00	DangsuA,DangsuB	AUGUCUCCUAGAGUUCCUCUGAGCACUUCAUUGGGGAUACAAUUUUUCUAAAUGAUUAUCCACUGAAGUGUUUGGGGGAACUCCCGGACCCAU
pyr-661	CUGAAGUGUUUGGGGGAACUCC	sly-MIR395b	-47.00	1.02	DangsuA,DangsuB	UUAAGGUGUUCCCUAGAGUUCCCUUGACCACUUCAUGAGGGCUUACUUUGAUGUUAGAAGCGUUGCUGAAGUGUUUGGGGGAACUCCUGGGUUGACUUUAA
pyr-661	CUGAAGUGUUUGGGGGAACUCC	tcc-MIR395b	-54.70	0.94	DangsuA,DangsuB	UAUGCCAGGUGCCCACUAGAGUUCCCCUGGGCACUUCAGUUGAUUUCUUUAGAGCUCAAAACCUCUUACCUGUCUACUGAAGUGUUUGGGGGAACUCCGGUUGCCAUCUGAGACAGU
pyr-661	CUGAAGUGUUUGGGGGAACUCC	vvi-MIR395m	-40.80	0.91	DangsuA,DangsuB	GUCCCCUAGAGUUCCCUUGAACACUUCACUGGGGACCUUCUCUAGUUAUAAUGACUUCCUACUGAAGUGUUUGGGGGAACUCCUGGUGCCAU
pyr-661	CUGAAGUGUUUGGGGGAACUCC	vvi-MIR395k	-36.00	0.82	DangsuA,DangsuB	UCCCCUAGAGUUCCCUUGACCACUUCACUGGGGACCUUCUCUAAUUAUAAUGACUUCCUACUGAAGUGUUUGGGGGAACUCCUGGUGCCAUU
pyr-661	CUGAAGUGUUUGGGGGAACUCC	rco-MIR395d	-40.20	1.03	DangsuA,DangsuB	CUAGAGUUCCCUUGACCACUUCAUUGUGGAUUAUUCUUCAAGCUCAAGGAGUUGGUUUACACUGAAGUGUUUGGGGGAACUCCUGGU
pyr-661	CUGAAGUGUUUGGGGGAACUCC	rco-MIR395c	-39.60	0.99	DangsuA,DangsuB	CUAGAGUUCCCUUGAGCACUUCACUGGGAUGAAAAAAGGUCCAGUCUUCCUUCCUACUGAAGUGUUUGGGGGAACUCCUGGU
pyr-661	CUGAAGUGUUUGGGGGAACUCC	vun-MIR395	-34.10	1.03	DangsuA,DangsuB	GAGUUCCCUUGAACGCUUCAUUAAGGGUUGUAUCAUUCGUAUAAACAGAUAAUUCCAUACUGAAGUGUUUGGGGGAACUCC
pyr-661	CUGAAGUGUUUGGGGGAACUCC	vvi-MIR395i	-40.10	0.89	DangsuA,DangsuB	GCCCCCUAGAGUUCCCCUGACCACUUCACUGGGGAUCUUCUGUAAUGACUUCCUACUGAAGUGUUUGGGGGAACUCCUGGUGUCAU
pyr-661	CUGAAGUGUUUGGGGGAACUCC	vvi-MIR395e	-36.00	0.80	DangsuA,DangsuB	CUCCCCUAGAGUUCCCUUGACCACUUCACUGGGGACCUUCUCUAAUUAUAAUGACUUCCUACUGAAGUGUUUGGGGGAACUCCUGGUGCCAU
pyr-661	CUGAAGUGUUUGGGGGAACUCC	ppe-MIR395l	-55.40	1.20	DangsuA,DangsuB	UCAGGUGUCACCUAGAGUUCCUCUGACCACUUCAUUGGGAAAUAGUCUUCUUGUAACUAUACAUCCUACUGAAGUGUUUGGGGGAACUCCAGGUGGCAUUUGA
pyr-661	CUGAAGUGUUUGGGGGAACUCC	ppe-MIR395f	-61.50	1.14	DangsuA,DangsuB	CAUCAGGUGUCCCCUAGAGUUUCCUCGAACACUUCAUUAGGAUGUCUAACUCUCUUAAUUAAACUAAUUAAGGGAUAAGUUAUACUUACAGUCUCUACUGAAGUGUUUGGGGGAACUCCGGGUGUCAUUUGAUG
pyr-661	CUGAAGUGUUUGGGGGAACUCC	ppe-MIR395g	-58.50	1.24	DangsuA,DangsuB	UGUUGUCAGGUGUCACCAAGAGUUCCCUCACUCACUUCAUUGGGAAAUAAUUCUUUCUGAUCAAUUAUAUAUCCUACUGAAGUGUUUGGGGGAACUCCUGGUGGCAUUUGAUUUUACA
pyr-661	CUGAAGUGUUUGGGGGAACUCC	ppe-MIR395d	-74.00	0.88	DangsuA,DangsuB	AUCCGUGGUAAUGUACUUAUUGUAGAAGCUGUGAUGAAAAAAGAGGAAAUAUUGUCAGGUGUCACCGAGAGUUCUCUUGACCACUUCAUUGGGAAAUAAUUCAUUCUGAUCAAUUAUAUAUCCCACUGAAGUGUUUGGGGGAACUCCUGGUGGCAUUUGAUUUUACAAAGAAUAACAAAGCUCUUACAAGCUUUCCACAUAUCCACCGCCAUGGAU
pyr-661	CUGAAGUGUUUGGGGGAACUCC	ppe-MIR395e	-62.00	1.32	DangsuA,DangsuB	GUCAGGUGUCACCGAGAGUUCCCUUGAACACUUCAUUGGGAAAUAAUUAGUUCUGAUCUAUUAUGUAUCCCACUGAAGUGUUUGGGGGAACUCCUGGUGGCAUUUGAU
pyr-661	CUGAAGUGUUUGGGGGAACUCC	ppe-MIR395c	-50.80	1.21	DangsuA,DangsuB	GUCAAGUGUCACUGAGAGUUCCCUUGACCACUUCAUUGGGAAAUAAUUCUUUCUGAUCAAUUAUAUAUCUUACUGAAGUGUUUGGGGGAACUCCUAGUGGCAUUUGAU
pyr-661	CUGAAGUGUUUGGGGGAACUCC	bra-MIR395d	-49.80	1.16	DangsuA,DangsuB	GUCGGAUGUUUCCUAGAGUUCCUCUGAGCACUUCAUUGGAUAUAACAUUUUCUAUCAAAAAGAAAUGUAUUCUACUGAAGUGUUUGGGGGAACUCCUGGACUCAUUCG
pyr-661	CUGAAGUGUUUGGGGGAACUCC	bra-MIR395b	-42.70	1.15	DangsuA,DangsuB	AUGUUUCCUAGAGUUCCUCUGAGCACUUCAUUGGAGAUACCAUUUAUUUUCUAUCAAAAUGUAUUCCACUGAAGUGUUUGGGGGAACUCCUGGA
pyr-661	CUGAAGUGUUUGGGGGAACUCC	bra-MIR395c	-50.90	1.18	DangsuA,DangsuB	GUCGGAUGUUUCCUAGAGUUCCUCUGAGCACUUCAUUGGAUAUAACAUUUUUUCUAUCAAAAUUAAAUGUAUUCCACUGAAGUGUUUGGGGGAACUCCUGGACUCAUUCG
pyr-661	CUGAAGUGUUUGGGGGAACUCC	ppe-MIR395h	-44.00	0.85	DangsuA,DangsuB	GUCAGAUGACCCCUAGAGUUUCUUUGACCAUUUCAUUGGGUGAUGAACCGAUAAACGAUCUUUUUCGAUAAGUUAUUUCUCAAAUAGAAGUUCCUACUGAAGUGUUUGGGGGAACUCCUGGGAUCAUUUGAU
pyr-661	CUGAAGUGUUUGGGGGAACUCC	bra-MIR395a	-47.30	1.15	DangsuA,DangsuB	AUGUCUCCUAGAGUUCCUCUGAGCACUUCAUUGGGUAUACAAUUUCUUAUGAAGAUUACCCACUGAAGUGUUUGGGGGAACUCCUGGACCCAU
pyr-661	CUGAAGUGUUUGGGGGAACUCC	mdm-MIR395c	-59.90	1.09	DangsuA,DangsuB	GAAUCAGGUGUCCCCUAGAGUUCCCCCGAACACUUCAUUAAGAUCGAUGCAUAAGUUCUUUGUAUAUUAAAUGAUGAUUGCACCAUCUCUACUGAAGUGUUUGGGGGAACUCCGGGUGUCAUUUGAUC
pyr-661	CUGAAGUGUUUGGGGGAACUCC	mdm-MIR395a	-44.80	1.04	DangsuA,DangsuB	CCUAGAGUUCCCCCGAAUACUUCAUUAGGAUCGAUACAUAAAUUCUUUGAAGGAUUGCACCGUCUCUACUGAAGUGUUUGGGGGAACUCCGGG
pyr-661	CUGAAGUGUUUGGGGGAACUCC	mdm-MIR395g	-55.50	0.99	DangsuA,DangsuB	GAAAAGAAUAAGGUCUGCAAUGCUAUCAGGUGUUACCAAGAGUUCCCUUGACCACUUCAUUGGGAAAUAGUCUCUUUUGUAACUAUAAAUCCUACUGAAGUGUUUGGGGGAACUCCUGGUUGCAUUUGAUUUUACAAAGAACAAAAAUUAUC
pyr-661	CUGAAGUGUUUGGGGGAACUCC	mdm-MIR395f	-59.90	1.09	DangsuA,DangsuB	GAAUCAGGUGUCCCCUAGAGUUCCCCCGAACACUUCAUUAAGAUCGAUGCAUAAGUUCUUUGUAUAUUAAAUGAUGAUUGCACCAUCUCUACUGAAGUGUUUGGGGGAACUCCGGGUGUCAUUUGAUC
pyr-661	CUGAAGUGUUUGGGGGAACUCC	mdm-MIR395e	-59.90	1.09	DangsuA,DangsuB	GAAUCAGGUGUCCCCUAGAGUUCCCCCGAACACUUCAUUAAGAUCGAUGCAUAAGUUCUUUGUAUAUUAAAUGAUGAUUGCACCAUCUCUACUGAAGUGUUUGGGGGAACUCCGGGUGUCAUUUGAUC
pyr-661	CUGAAGUGUUUGGGGGAACUCC	mdm-MIR395d	-52.80	0.80	DangsuA,DangsuB	AUCAGGUGUCCCCUAGAGUUCCCUUGACCACUUCAUUGGGAGGUGAGAGAUCAAUCGUGGAUAUGGUUUUCGAACAAUUGUCCUCCACUCCUCCUAUGUAUUCCUACUGAAGUGUUUGGGGGAACUCCUGGUGUCAUAUGAU
pyr-661	CUGAAGUGUUUGGGGGAACUCC	sly-MIR395a	-59.40	0.78	DangsuA,DangsuB	AGGGCUUACUUUGAUGUUGGAAGCCUUGCUGAAGUGUUUGGGGGAACUCCCGGGUUGACUUUGAAAAUUACGCAAACAAGUAUAUAUAAAUGCAUGAGUACGUAUUAGCUAAAGAUGAUGAGUACAAUAUUGAUUCAUGUACCUUUGGAGUUCCCUUGACCACUUCAUGAGAGCUUAAUAUUUGAUUGUUUGAAGUCCU
pyr-661	CUGAAGUGUUUGGGGGAACUCC	ptc-MIR395h	-42.60	0.87	DangsuA,DangsuB	GUGUCCCCUAGAGUUCCUCUGAGCACUUCAUUGGGGAUCUUCCAUCGACCUGAAAGAGUAUUAUCAUUCCUACUGAAGUGUUUGGGGGAACUCCUGGUGUCA
pyr-661	CUGAAGUGUUUGGGGGAACUCC	mdm-MIR395i	-48.50	1.01	DangsuA,DangsuB	UCAGGUGUCACCAAGAGUUCCCUUGACCACUUCAUUGGGAAAUAGUCUCUUUUGCAACUAAAUAUCCUACUGAAGUGUUUGGGGGAACUCCCGGCGGCAUUUGA
pyr-661	CUGAAGUGUUUGGGGGAACUCC	ppe-MIR395i	-50.50	1.17	DangsuA,DangsuB	UGUUGUCAGGUGUCACCGAGAGUUCCCUUACUCACUUCAUUGGGAAAUAAUUAUUUUUGAUAAAUUAUAUAUCCUACUGAAGUGUUUGGGGGAACUCCUGGUUGCAUUUGAUUUUACA
pyr-661	CUGAAGUGUUUGGGGGAACUCC	bna-MIR395b	-42.10	1.14	DangsuA,DangsuB	UCCUAGAGUUCCUCUGAGCACUUCAUUGGAGAUACCGUUUAUUUUCUAUCAAAAUGUAUUCCACUGAAGUGUUUGGGGGAACUCCUGGA
pyr-661	CUGAAGUGUUUGGGGGAACUCC	bna-MIR395c	-43.00	1.16	DangsuA,DangsuB	UGUUUCCUAGAGUUCCUCUGAGCACUUCAUUGGAUAUAACAUUUUCUAUCAAAAAGAAAUGUAUUCUACUGAAGUGUUUGGGGGAACUCCUGGACUCA
pyr-661	CUGAAGUGUUUGGGGGAACUCC	vvi-MIR395f	-43.60	0.99	DangsuA,DangsuB	GUACCCUAGAGUUCCCCUGACCACUUCACUGGGGAUCUUCUCUAAUGACUUCCCACUGAAGUGUUUGGGGGAACUCCUGGUGUCAU
pyr-661	CUGAAGUGUUUGGGGGAACUCC	bna-MIR395a	-45.80	1.27	DangsuA,DangsuB	UCCUAGAGUUCCUCUGAGCACUUCAUUGGGUAUACAAUUUCUUAUGAAGAUUACCCACUGAAGUGUUUGGGGGAACUCCUGGA
pyr-661	CUGAAGUGUUUGGGGGAACUCC	aly-MIR395g	-50.30	1.09	DangsuA,DangsuB	GUCGGAUGUUCCCUAGAGUUCCUCUGAGCACUUCAUUGGAGAUACCAUUGUCUAUGAAAUAGUAUUCUACUGAAGUGUUUGGGGGAACUCCUGGACUCAUUCGAU
pyr-661	CUGAAGUGUUUGGGGGAACUCC	ptc-MIR395i	-42.60	0.87	DangsuA,DangsuB	GUGUCCCCUAGAGUUCCUCUGAGCACUUCAAUGGGGAUCUUCCAUCGACCUGAAAGAGUAUUAUCAUUCCUACUGAAGUGUUUGGGGGAACUCCUGGUGUCA
pyr-661	CUGAAGUGUUUGGGGGAACUCC	aly-MIR395e	-55.20	1.20	DangsuA,DangsuB	GUCGGAUGUUUCCUAGAGUUCCUCUGAGCACUUCAUUGGAGAUACCAUCUUUUAUCAAAUGGUUUUCUACUGAAGUGUUUGGGGGAACUCCCGGACUCAUUCGAU
pyr-661	CUGAAGUGUUUGGGGGAACUCC	aly-MIR395d	-54.90	1.00	DangsuA,DangsuB	ACAAAAUAUAAUUCGACUAGAUGUCCUCUAGAGUUCUCCCGAACACUUCAUUGGAAAUUUGUUAUUCGGUAAACUACCAAUUAAUUCCACUGAAGUGUUUGGGGGAACUCCGGAUGUCAUUUGGUGAUGUCAAGCCAUGU
pyr-661	CUGAAGUGUUUGGGGGAACUCC	ptc-MIR395d	-42.70	0.93	DangsuA,DangsuB	GUGUCCCCUAGAGUUCCUCUGAGCACUUCACUGGGAAUUUCCGAUCAAAUGAAAGAGUAUUAUCAUUCCUACUGAAGUGUUUGGGGGAACUCCUGGUGUCA
pyr-661	CUGAAGUGUUUGGGGGAACUCC	ptc-MIR395g	-42.60	0.87	DangsuA,DangsuB	GUGUCCCCUAGAGUUCCUCUGAGCACUUCAUUGGGGAUCUUCCAUCGACCUGAAAGAGUAUUAUCAUUCCUACUGAAGUGUUUGGGGGAACUCCUGGUGUCA
pyr-661	CUGAAGUGUUUGGGGGAACUCC	vvi-MIR395d	-40.10	0.91	DangsuA,DangsuB	GCCCCCUAGAGUUCCCCUGACCACUUCAUUGGGGAUCUUCUCUAAUGACUUCCUACUGAAGUGUUUGGGGGAACUCCUGGUGUCAU
pyr-661	CUGAAGUGUUUGGGGGAACUCC	ptc-MIR395b	-44.30	0.89	DangsuA,DangsuB	GUGUCCCCUAGAGUUCCCUUGAGCACUUCACUGGGACCCUUCAGACCGAAAGAGUAUUAUCUUUCCCACUGAAGUGUUUGGGGGAACUCCUGGUGUCA
pyr-661	CUGAAGUGUUUGGGGGAACUCC	ptc-MIR395c	-42.30	0.96	DangsuA,DangsuB	GUGUCCCCUAGAGUUCCUCUGAGCACUUCAUUGGGAAUCUUCGAUUAAAUGAAAGAGUAUUAUCAUUCCUACUGAAGUGUUUGGGGGAACUCCUGGUGUCA
pyr-661	CUGAAGUGUUUGGGGGAACUCC	nta-MIR395c	-47.60	0.97	DangsuA,DangsuB	UUCCCCUAGAGUUCUCCUGAUCACUUCAUUGGGACUUCAAAAAUGCCCUUAAAAUGGAAAGGGUAUUAAUUAUUAAUGCCUACUGAAGUGUUUGGGGGAACUCCGGGAGCCAC
pyr-661	CUGAAGUGUUUGGGGGAACUCC	vvi-MIR395c	-36.50	0.79	DangsuA,DangsuB	GUCCCCUAGAGUUCCCUUGACCACUUCACUGGGGACCUUCUCUAGUUAUAAUGACUUCCUACUGAAGUGUUUGGGGGAACUCCUGGUGCCAU
pyr-708	CAGCCAAGGAUGACUUGCCUA	pde-MIR169	-47.90	1.11	DangsuA,DangsuB	ACUAUUUAUUCAGCCAAGGAUGACUUGCCUAGAUCUUGUUACCAGUAUCGGCUAGUUAUGCUGAUAUCGAUUUCAGUCACUAGGUGAGUCGUCCUUGGCUAAA
pyr-3604	AUCAGGAGAGAUGACACCGAC	ata-MIR1432	-70.20	1.10	DangsuA,DangsuB	GGUCCUGUGAUCAGGAGAGAUGACACCGACGCCGAUCAGAUGGGUCGGCUUAACCAGGCCAUGCAUCCGUCUGUUCGGAGUUGGUGUCACCUCGCCUGAACAUAGGGCUC
pyr-2447	CUCAAGAAAGCUGUGGGAGA	mtr-MIR396a	-37.60	1.14	DangsuA,DangsuB	UGCUUUUCCACAGCUUUCUUGAACUUCUUUCGUAUCUUAAAUCUGUUUUCAAGAUUAAAAGUCCUAGAAGCUCAAGAAAGCUGUGGGAGAAUA
pyr-2447	CUCAAGAAAGCUGUGGGAGA	lus-MIR396b	-62.80	0.87	DangsuA,DangsuB	UCAGACUAGUCCUGGCCAUGCUAUUCCACAGCUUUCUUGAACUUUCCUAAUAUCUAUACUCGAUUAGCCCUUUUCCACCCUCAAUUGUGGCUUAUAUAUAUAAUAUGGAGCAUUUCCAUGGGAGAGCUCAAGAAAGCUGUGGGAGACCAUGCCACUUUCAGGACUUUUUGA
pyr-2447	CUCAAGAAAGCUGUGGGAGA	ppe-MIR396b	-49.50	1.01	DangsuA,DangsuB	GUCAUGCUUUUCCACAGCUUUCUUGAACUUCAAUUCUUUGCUGUCUAAGCUUAUCGCUUUCAAGAUUAGCUAGCGCCAUCGAAGCUCAAGAAAGCUGUGGGAGAACAUGGC
pyr-2447	CUCAAGAAAGCUGUGGGAGA	ptc-MIR396e	-58.20	1.06	DangsuA,DangsuB	GGUCAUGCUUUUCCACAGCUUUCUUGAACUUCUUUGCCUUGCUUAAUCUGUGUAUAUAUAGAUCACUACAUGUACAGCUCCUAUAUAUAUAAAUAUAUGUAUGUAUAGCGCCAUGGAAGCUCAAGAAAGCUGUGGGAGAACAUGG
pyr-2447	CUCAAGAAAGCUGUGGGAGA	gma-MIR396k	-48.07	0.84	DangsuA,DangsuB	UUCCUCUCAAGUCCUGGUCAUGCUUUUCCACAGCUUUCUUGAACUUCUUAUGCAUCUUAUAUCUCUCCACUUCCAGCAUUUUAAGCCCUAGAAGCUCAAGAAAGCUGUGGGAGAAUAUGGCAAUUCAGGCUUUUAAUUG
pyr-2447	CUCAAGAAAGCUGUGGGAGA	gma-MIR396b	-48.70	0.89	DangsuA,DangsuB	CUCAAGUCCUGGUCAUGCUUUUCCACAGCUUUCUUGAACUUCUUAUGCAUCUUAUAUCUCUCCACCUCCAGGAUUUUAAGCCCUAGAAGCUCAAGAAAGCUGUGGGAGAAUAUGGCAAUUCAGGCU
pyr-2447	CUCAAGAAAGCUGUGGGAGA	mes-MIR396e	-42.90	1.30	DangsuA,DangsuB	GUCAUGCUUUUCCACAGCUUUCUUGAACUUUCUUUUACUGCUUAGGAAGCUCAAGAAAGCUGUGGGAGAACAUGGC
pyr-2447	CUCAAGAAAGCUGUGGGAGA	ccl-MIR396	-92.30	0.75	DangsuA,DangsuB	AGAGUGGUCCUUGAAAUAGCCUCUUUGUAUGGGCUUCCUGCUUAAUUCUUCCUCUCUAACAUCGAGUGUAAAAUGAAUGGAAGAUCAUCAAGCCACAGAUAUGAGAUCUGAACAUUAUUAUUAUUAAGUCCUGGUCAUGCUUUUCCACAGCUUUCUUGAACUUCCACUGUUUGCUGAUUAAUACACGGCUCUUGCUAGCUAGGCGCCGUAUGUAGACACCGCGCGCCAUGGGAGCUCAAGAAAGCUGUGGGAGAACAUGGCACACCUUCAGGAUUUG
pyr-2447	CUCAAGAAAGCUGUGGGAGA	gma-MIR396g	-46.17	0.71	DangsuA,DangsuB	AUGCUGUGUGUGUGAGAUCUGAGCUCAAUUUUCCUCUCAAGUCCUGGUCAUGCUUUUCCACAGCUUUCUUGAACUUCUUAUGCAUCUUAUAUCUCUCCACUUCCAGCAUUUUAAGCCCUAGAAGCUCAAGAAAGCUGUGGGAGAAUAUGGC
pyr-2447	CUCAAGAAAGCUGUGGGAGA	gma-MIR396d	-42.97	0.95	DangsuA,DangsuB	GGUCAUGCUUUUCCACAGCUUUCUUGAACUUCUUAUGCAUCUUAUAUCUCUCCACUUCCAGCAUUUUAAGCCCUAGAAGCUCAAGAAAGCUGUGGGAGAAUAUGGCAA
pyr-2448	UAGCCAAGGAUGAUUUGCCUGC	mdm-MIR169b	-67.30	0.76	DangsuA,DangsuB	GGAAGAGAUGUCAAACAUGGAAGAAGGAGCCUUGUUUGGUAGCCAAGGAUGAUUUGCCUGCAGCCUCGAUCCUAAAGAGUAAAGAGGUUUAUUACACGAUAAAAAUCAGAAAAACCCUAGUUGAGUUCUCAGGCAGUCACGCCUUGGCGACGUGACAAGCUCUUCUCUCUCAUGCUAGGCUGCUCUCUUCC
pyr-2023	UCGCUUGGUGCAGGUCGGGAA	ppe-MIR168	-74.00	0.80	DangsuA,DangsuB	UUCAGUUACUGGCGGUCUCUAAUUCGCUUGGUGCAGGUCGGGAACUGCUUCGCGUUUAGGGCCUUUUUUUCGUACAAGACCUAUGAGCCAGGUGGCGCCAUGGUAUUGGUCGGUGGGUGCGAAAUGGGUCCCGCCUUGCAUCAACUGAAUCGGAGACCGCGGUGAAGAG
pyr-2023	UCGCUUGGUGCAGGUCGGGAA	ath-MIR168a	-68.50	0.93	DangsuA,DangsuB	CACCAUCGGGCUCGGAUUCGCUUGGUGCAGGUCGGGAACCAAUUCGGCUGACACAGCCUCGUGACUUUUAAACCUUUAUUGGUUUGUGAGCAGGGAUUGGAUCCCGCCUUGCAUCAACUGAAUCGGAUCCUCGAGGUG
pyr-2023	UCGCUUGGUGCAGGUCGGGAA	ath-MIR168b	-61.80	0.91	DangsuA,DangsuB	UUACCGGCGGUCUCGGAUUCGCUUGGUGCAGGUCGGGAACUGAUUGGCUGACACCGACACGUGUCUUGUCAUGGUUGGUUUGUGAGCUCCCGUCUUGUAUCAACUGAAUCGGAGUCCGAGGUGA
pyr-2023	UCGCUUGGUGCAGGUCGGGAA	aly-MIR168a	-71.40	0.87	DangsuA,DangsuB	GAGUCUCACCGUCGGGCUCGGAUUCGCUUGGUGCAGGUCGGGAACCAAUUCGGCUGACACAGCCUCGUGACUUUAAAACCUUUAUUGGUUUGUGAGCAGGGAUUGGAUCCCGCCUUGCAUCAACUGAAUCGGAUCCCCGAGGUGUAAGAAAACUC
pyr-2023	UCGCUUGGUGCAGGUCGGGAA	aly-MIR168b	-62.90	0.82	DangsuA,DangsuB	AGAGAGAAAUACGAUGAUUUAAAGUUACCGGCGGUCUCGGAUUCGCUUGGUGCAGGUCGGGAACUGAUUAGCUGACAAUUACACGUGUGUUGUCAUGGUUGGUUUGUGAGAUCCCGUCUUGUAUCAACUGAAUCGGAGUCCGAGGUGAAAAAAAUAAGGAUCUUACUUUCAGAUCU
pyr-2023	UCGCUUGGUGCAGGUCGGGAA	lus-MIR168a	-65.20	0.73	DangsuA,DangsuB	UGUCUGUGUGUGUUACUUGCGUUCUCUGAUUCGCUUGGUGCAGGUCGGGAACUGAUUGCGUUUCUCCCUGCCGGCAUCCGACUGCUGCUGUCGCCAGUGGGUUAGAAACAAAUUGGAUCCUGCCUUGCGUCAACUGAAUCGGCGACUGCAGUGAAUUUGCCGGAGA
pyr-2023	UCGCUUGGUGCAGGUCGGGAA	lus-MIR168b	-71.30	0.76	DangsuA,DangsuB	UACUUGCGCUCUCUAAUUCGCUUGGUGCAGGUCGGGAACUAAUUGCUUCUCGUCCCCUAGAUUUGCCGACGCCAUCUUCUCUGCCCCGUUCUCUUCCGCUGAGAUAUGGUGGCUGUCGUCGUCAAGGGUAGAGCGAAUUAGAUCCCGCCUUGCAUCAACUGAAUCGGAUACCGCAGUA
pyr-2023	UCGCUUGGUGCAGGUCGGGAA	rco-MIR168	-50.00	0.88	DangsuA,DangsuB	CUAAUUCGCUUGGUGCAGGUCGGGAACUGAUUGGCUUUUCUAUUUCUAAUGAUUUCCAGGCGGCGAAAAGUUAUUGGUCAAGAUUAGAUGGAAAGUGAAUUGGAUCCCGCCUUGCAUCAACUGAAUCGAAG
pyr-2023	UCGCUUGGUGCAGGUCGGGAA	crt-MIR168	-70.90	0.82	DangsuA,DangsuB	AGUUACCGGCGGUCUCUAAUUCGCUUGGUGCAGGUCGGGAACUGAUUGGCUAGUUUUUUUUUGAAAUUUUUUGACAGCGAGGUGGCGUGUUGUAAUUGGUCGUCACGUUUAAAUUAAUGAUUGAAAAAAAUGCGAAUUGGAUCCCGCCUUGCAUCAACUGAAUCGGAGACCGAGGUGAGAGAUUGGAUGGAUAUUUACCUU
pyr-2023	UCGCUUGGUGCAGGUCGGGAA	bna-MIR168a	-69.30	0.89	DangsuA,DangsuB	UUACGGCGGCCUCUGACUCGCUUGGUGCAGGUCGGGAACUGAUUGGCUGACACCGCCACGUGGCUUUCCAUGGUUGGCUUGUGAGCAGGGAUCGGAUCCCGCCUUGUAUCAAGUGAAUCCGAGUCCGACGUGA
pyr-2023	UCGCUUGGUGCAGGUCGGGAA	nta-MIR168d	-115.40	0.81	DangsuA,DangsuB	GGUCUCUAAUUCGCUUGGUGCAGGUCGGGAACUGACUCGCCGGUGACGCUGUCCGCGCCGGAAUCGGCGCCUUUCAUUGAUAUUUUGUUUAUAUGUAUCGAUAUUUAGAGAGCUCUCAUUAGGACUUAUUUGUUAGUAAAAUUUUGUUGUUGAAAUUAACUUGAUAUAUGUAUAGAUAAGUAGAGUGUUUACCCCUGGUUGGUUAAGUAAUAGAUAUGUAGAGAGUGUUUACCCACGGUUGGUUAAGUAAUGGAUAUGUAGAGAGUUCAAUUUUUUUAAUAGAUUAGUUAUGAAUGAAAGUGCGCCUCGUCGAUGGCUAAGUUUGUUCCCGCCUUGCAUCAACUGAAUUGGUGACCGC
pyr-2023	UCGCUUGGUGCAGGUCGGGAA	nta-MIR168e	-98.40	0.74	DangsuA,DangsuB	GGUCUCUAAUUCGCUUGGUGCAGGUCGGGAACUGACUCACCGGUGACGCUGUCCGCGCCGGAAUCGGUGGCGUUAGUUUCGUUGAUAUUUUGUUUGCAUUUAUCGAUAUUUAGAGAGCUCUCUUUAGGACUUAUUUGUUAGUAAUUUGUUUUGUUGAAAUUAACUUGAUGUAUGUGUAGAUAAGUAGAGAGUGUUUACCCCCGGUUGGUUAAGUAAUAGAUAUGAAGAGAGUUCAUUUUUUUUUUGUUUUUAAUAAAUUAGUUAUGUAUGAAAGUGCGCCUCGUCUAUGGCUUAAGUUUGUUCCCGCCUUGCAUCAACUGAAUCGGUGACCGC
pyr-2023	UCGCUUGGUGCAGGUCGGGAA	cme-MIR168	-69.90	0.70	DangsuA,DangsuB	GGUCUCUAAUUCGCUUGGUGCAGGUCGGGAACCGCUUCGCUCAGCCUACGGUUUACGUUUUGUCGUUGGCCGGUCCUUCUUCAUUUUCCUUUUUUGUUCUUCUCUGCUUUUGUUUUUUGCUUAAUUUCUUUGCCGCUGUGCGGUGUUAUCUUGUUGCGAAAAUGUGUGGGCGAAUUGGAUCCCGCCUUGCAUCAACUGAAUCGGAAACCG
pyr-2023	UCGCUUGGUGCAGGUCGGGAA	mtr-MIR168b	-45.30	0.91	DangsuA,DangsuB	AACCUCUGAUUCGCUUGGUGCAGGUCGGGAACCAUUACAUCCACAGUUUCCCUCGGUAAAUUGGAUCCUGCCUUGCAUCAAUCGAAUCGGAGGCUGCA
pyr-2023	UCGCUUGGUGCAGGUCGGGAA	mtr-MIR168c	-67.50	0.98	DangsuA,DangsuB	CUCACUUCGCGGUCUCUAAUUCGCUUGGUGCAGGUCGGGAACCACUACAUCCGCUGUUUUCGUAGAAACCGGCGGUGAAUUGGAUCCCGCCUUGCAUCAACUGAAUCGGAGGCCGCGGUGAAUCUA
pyr-2023	UCGCUUGGUGCAGGUCGGGAA	mes-MIR168a	-77.00	0.92	DangsuA,DangsuB	UUACCGGCGGUCUCUAAUUCGCUUGGUGCAGGUCGGGAACUGAUUAGCUUCGCUUGCAUAUGUACGUAUAUGUUUUCUCCUUAUUAUGCCAGAUGGCAAGUCUUGAUUGGUUGAGAUCGGACAGAAGCGAAUUGGAUCCCGCCUUGCAUCAACUGAAUCGGAGACCGCGGUGA
pyr-2023	UCGCUUGGUGCAGGUCGGGAA	mdm-MIR168a	-74.40	0.91	DangsuA,DangsuB	GCGGUCUCUAAUUCGCUUGGUGCAGGUCGGGAACCGCUUUGCCCUACUUUACCGUGUCUGGGCCUAUGAGCUAGGUGGCUCGAUGUGUAAUCGGCCACAGGGCAAAACAGGUCCCGCCUUGCAUCAACUGAAUCGGAGACCGC
pyr-2023	UCGCUUGGUGCAGGUCGGGAA	atr-MIR168	-82.70	0.80	DangsuA,DangsuB	UCAAGAGCUAUCCAUGGAUUGAGGGUCCAGAGAGAAACAUGCAAUACAAAAGUUUGGGCUUCUUCUUACUGCUUACUCUAGCUCGCUUGGUGCAGGUCGGGAACCCUUCGCACUUUAAUACCCUCACUAGCAGAGGGUUCCCGCCUUGCAUCAACUGAAUUGGAGACUACAGUAAAGAUUCGAUGUUUUACUAUGAUUGCACUGGAUUUUUAUCUUGCGGACAGGUCUGA
pyr-2023	UCGCUUGGUGCAGGUCGGGAA	vun-MIR168	-62.60	0.85	DangsuA,DangsuB	CACUGUGCGGUCUCUAAUUCGCUUGGUGCAGGUCGGGAACCGGUUUCUGCGCGAAAUGGUGAAGUGGUAGCCGGCGGCGAAUUGGAUCCCGCCUUGCAUCAACUGAAUCGGAGGCCGCAGUGAGG
pyr-2023	UCGCUUGGUGCAGGUCGGGAA	tcc-MIR168	-77.10	0.82	DangsuA,DangsuB	AGUUACCGGCGGUCUCUAAUUCGCUUGGUGCAGGUCGGGAACUGAUUGGCUGCUGCUCCUUAAUAGUGGAUUGGAUUGGAUUUAGGCCAGAUGGCGGGCCGUGACUGGAGGAGGCACGAAUUGGAUCCCGCCUUGCAUCAACUGAAUCGGAGACCGCGGUGAGGGGU
pyr-2023	UCGCUUGGUGCAGGUCGGGAA	cca-MIR168a	-46.20	0.82	DangsuA,DangsuB	UCUGAUUCGCUUGGUGCAGGUCGGGAACAGCUUUGCCGUCGAUUUUCACAUUUGUCUUCACGGUGUGAGAAACUCGUACGGUGGUUGUUGCUCUUGCCUUACAUCAACUGAAUCUGAA
pyr-2023	UCGCUUGGUGCAGGUCGGGAA	gma-MIR168a	-65.40	0.84	DangsuA,DangsuB	CACUGUGCGGUCUCUAAUUCGCUUGGUGCAGGUCGGGAACCGGUUUUCGCGCGGAAUGGAGGAGCGGUCGCCGGCGCCGAAUUGGAUCCCGCCUUGCAUCAACUGAAUCGGAGGCCGCGGUGAAC
pyr-2023	UCGCUUGGUGCAGGUCGGGAA	gma-MIR168b	-58.60	0.86	DangsuA,DangsuB	CGGUCUCUAAUUCGCUUGGUGCAGGUCGGGAACCGGUUUUCGCGCGGAAUGGAGGAACGGUCGCCGGCGGCGAAUUGGAUCCCGCCUUGCAUCAACUGAAUCGGAGGCCG
pyr-2023	UCGCUUGGUGCAGGUCGGGAA	ptc-MIR168b	-53.80	0.85	DangsuA,DangsuB	GGUCUCUAAUUCGCUUGGUGCAGGUCGGGAACUGAUUCGGCGAUUUGAUUGCCAGAUGGCUAAACACGAUUGGCUGUGAGGCAAAUUAUAAAAAGAAAGAGAAUUGGAUCCCGCCUUGCAUCAACUGAAUCGGAGA
pyr-2023	UCGCUUGGUGCAGGUCGGGAA	ptc-MIR168a	-58.20	0.78	DangsuA,DangsuB	GGUCUCUGAUUCGCUUGGUGCAGGUCGGGAACUGAUUCGGCGAUUUGAUUGCCAGAUGGCUCGACAUGACUGGUUGUUGUGGAAAAAGAAAAGGAAGGAAACAGGAAAAAAAACAAAGAAUAGCGAAUUGGAUCCCGCCUUGCAUCAACUGAAUCGGAGG
pyr-2023	UCGCUUGGUGCAGGUCGGGAA	vvi-MIR168	-69.70	0.83	DangsuA,DangsuB	GGUCUCUAAUUCGCUUGGUGCAGGUCGGGAACCGACUUCGCCGCUCCGGCAGCGCCGGAGGCACGCGGCGGCCUACGAUUGGUUGCUGAGCGAAUUCCGAUCCCGCCUUGCAUCAACUGAAUCGGAGACGGC
pyr-2023	UCGCUUGGUGCAGGUCGGGAA	ccl-MIR168	-68.40	0.88	DangsuA,DangsuB	GUUACCGGCGGUCUCUAAUUCGCUUGGUGCAGGUCGGGAACUGAUUGGCUAGUUUUUUUUUGAAAUUUUUUGACAGCGAGGUGGCGUGUUGUAAUUGGUCGUCACGUUUAAAUUAAUGAUUGAAAAAAAUGCGAAUUGGAUCCCGCCUUGCAUCAACUGAAUCGGAGACCGAGGUG
pyr-2023	UCGCUUGGUGCAGGUCGGGAA	bra-MIR168a	-69.30	0.89	DangsuA,DangsuB	UUACGGCGGCCUCUGACUCGCUUGGUGCAGGUCGGGAACUGAUUGGCUGACACCGCCACGUGGCUUUCCAUGGUUGGCUUGUGAGCAGGGAUCGGAUCCCGCCUUGUAUCAAGUGAAUCCGAGUCCGACGUGA
pyr-1618	UUGCAUAUCUCAGGAGCUUCA	hbr-MIR159a	-93.00	0.97	DangsuA,DangsuB	UUGAAUACUGAUUUAGGGUUAAGAAGUGGAGCUCCUUGAAGUCCAAUAGAGGUUCUUGCUGGGUAGAUUGAGCUGCUGAGCUAUGGAUCCCUCAGCCCUAUCCCAUCAUAAAGAGUAGUCCUCUUGGAUAGGCUUGUGGCUUGCAUAUCUCAGGAGCUUCAUUACCACAUAUGUUAGAUCCUUGUUUGGAUUGAAGGGAGCUCUACAUCUAAAUCUUUCAC
pyr-1618	UUGCAUAUCUCAGGAGCUUCA	mes-MIR159a	-88.50	1.09	DangsuA,DangsuB	UGGAGCUCCUUGAAGUCCAAUAGAGGAUCUUGCUGGGUAGAUUGAGCUGCUGAGCUAUGGAUCCCACAGCCCUAUCUCAUAAUAAAGACUCUAGUCUUCUUGGAUAGGCUUGUGGCUUGCAUAUCUCAGGAGCUUCAUUACCUCUUAUGUUAGAUCCUUGUUUGGAUUGAAGGGAGCUCUA
pyr-1618	UUGCAUAUCUCAGGAGCUUCA	hbr-MIR159b	-95.60	1.00	DangsuA,DangsuB	CUGAUUAGGGUUAAGAAGUGGAGCUCCUUGAAGUCCAAUAGAGGUUCUUGCGUGGGUAGAUUGAGCUGCUGAGCUAUGGAUCCCUCAGCCCUAUCCCAUCAUAAAGAGUAGUCCUCUUGGAUAGGCUUGUGGCUUGCAUAUCUCAGGAGCUUCAUUACCACAUAUGUUAGAUCCUUGUUUGGAUUGAAGGGAGCUCUACAUCUAAAUCUUUCAC
pyr-1618	UUGCAUAUCUCAGGAGCUUCA	cme-MIR159a	-78.10	0.85	DangsuA,DangsuB	GAGGCAGAGCUCCUUGAAGUCCAAUAGAGGUUUAUGCCAGGUUGAUUGAGCUGCUAAGCUAUGGAUCCCACAGCCCCUAUUGCUAUAUCCAUCAUGUUGUUGUAUAAUAUCUUUAAAGCUGAUAGGCCUGUGGCUUGCAUAUCUCAGGAGCUUCAUCACCUGUUUCUGUUAGAUCCUUGUUUGGAUUGAAGGGAGCUCUACAUCUUCUCU
pyr-1618	UUGCAUAUCUCAGGAGCUUCA	rco-MIR159	-86.20	1.09	DangsuA,DangsuB	GAGUGGAGCUCCUUGAAGUCCAAUAGAGGAUCUUGAUGGGUAGAUUGAGCUGCUGAGCUAUGGAUCCCACAGCCCUAUAAGCAGAGAUUAUAAUUUUGGAUAGGCUUGUGGCUUGCAUAUCUCAGGAGCUUCAUUACCUUGUAUUAGAUCCUUGUUUGGAUUGAAGGGAGCUCUACAUCU
pyr-1612	UUCCCAAUUCCGCCCAUUCCU	vun-MIR482	-47.90	1.17	DangsuA,DangsuB	UCAGAAAUUGUGGGAAUGGGCUGAUUGGGAAGCAAUGAAAUCAUCUCAAGUGAUUGUGCGUAAUUUUCUUCCCAAUUCCGCCCAUUCCUAUGAUUUCUGA
pyr-1612	UUCCCAAUUCCGCCCAUUCCU	pvu-MIR482	-58.70	0.98	DangsuA,DangsuB	GGGAUCCGGAGAUUGGAGCAAUCAGAAUUUGUGGGAAUGGGCUGAUUGGGAAGCAAUGUGUGCUGGUGCAAUGCAUUUAAUUUCUUCCCAAUUCCGCCCAUUCCUAUGAUCUCUGAUGAUUCUUUCCUUUCCU
pyr-1612	UUCCCAAUUCCGCCCAUUCCU	gma-MIR482c	-40.90	1.17	DangsuA,DangsuB	AGAAUUUGUGGGAAUGGGCUGAUUGGGAAGUAAUGAGAUUGAGCAAUACAUUUAAUUUCUUCCCAAUUCCGCCCAUUCCUAUGAUUUCUG
pyr-1612	UUCCCAAUUCCGCCCAUUCCU	gma-MIR482a	-48.70	1.19	DangsuA,DangsuB	UCAGAAUUUGUGGGAAUGGGCUGAUUGGGAAGCAAUGUGUGCUGGUGCAAUGCAUUUAAUUUCUUCCCAAUUCCGCCCAUUCCUAUGAUUUCUGA
pyr-1613	UGAGCCAAGGAUGACUUGCCU	cme-MIR169k	-43.30	1.01	DangsuA,DangsuB	GAGAGUAAGUAUGAGCCAAGGAUGACUUGCCUGCCCUAAUUUUCUUCAAAGAUAAGCAAUUAAUUCAUCUUCUUUUCAAAUUUGUUUGGGAAGUCAUCCUUGGCUCAUUUUUCCUCU
pyr-1124	UAGCCAAGGAUGAUUUGCCUG	osa-MIR169r	-52.90	0.75	DangsuA,DangsuB	AGGCCAUCUUCGAUAGCCAAGGAUGAUUUGCCUGUAGCCCCAUUGUCAUCAGCUCUCUCCGUCGAGAGCGACAACCGGGCUCUACUGGCAAGUCUCCUCGGCUACCCGAGUACCUCUUAUGCUAUCCCA
pyr-1124	UAGCCAAGGAUGAUUUGCCUG	sbi-MIR169o	-62.50	1.08	DangsuA,DangsuB	AUAGCCAAGGAUGAUUUGCCUGUAGCAACCUCUGAGUGCUCCUGCUGCCAUGGCAGUCAGGAGCGCCAAGUGGGUGCUUCUCCGGGCAAAUCAUCUGGGCUAG
pyr-1124	UAGCCAAGGAUGAUUUGCCUG	bdi-MIR169k	-88.70	0.94	DangsuA,DangsuB	UCUUUGCAUGGAAGUAGGAGGCCAUCUUUGAUAGCCAAGGAUGAUUUGCCUGUAAAACCGAUUGUCGUCGCCUCUCGGUGCCGUUCCAGGCACUCGAAGGGAGGGCGGCAGCAACAGGUUCUAUGGGCAAGUCAGCCUGGCUACCCGAGUACCUCUUACCCAUAUUCCAUGCCA
pyr-1124	UAGCCAAGGAUGAUUUGCCUG	ata-MIR169j	-58.10	0.82	DangsuA,DangsuB	CCAUCUUCGAUAGCCAAGGAUGAUUUGCCUGUGAAACUCCCUUGGCAGCCGAGCUCUCUGCCACAGAGAGCGGCGUCCGGCGGUUCCAUGGGCAAGUCACCCUGGCUACCCGAGUACCU
pyr-1124	UAGCCAAGGAUGAUUUGCCUG	mdm-MIR169b	-67.30	0.76	DangsuA,DangsuB	GGAAGAGAUGUCAAACAUGGAAGAAGGAGCCUUGUUUGGUAGCCAAGGAUGAUUUGCCUGCAGCCUCGAUCCUAAAGAGUAAAGAGGUUUAUUACACGAUAAAAAUCAGAAAAACCCUAGUUGAGUUCUCAGGCAGUCACGCCUUGGCGACGUGACAAGCUCUUCUCUCUCAUGCUAGGCUGCUCUCUUCC
pyr-1124	UAGCCAAGGAUGAUUUGCCUG	tae-MIR169	-80.60	0.92	DangsuA,DangsuB	UGGGGGUAAGAGGCCAUCUUCGAUAGCCAAGGAUGAUUUGCCUGUGAAACUCCCUUGGCAGCCGAGCUCUCUGCCACAGAGAGCGGCGUCCGGCGGUUCCAUGGGCAAGUCACCCUGGGCUACCCGAAGUACCUCUUACCACACCCCAU
pyr-1124	UAGCCAAGGAUGAUUUGCCUG	ata-MIR169b	-57.80	0.98	DangsuA,DangsuB	ACAUCUUCGAUAGCCAAGGAUGAUUUGCCUGUGAACCUCCCCCGGGAGCCCAGCUCUCGGGAACCUGGUUCCAUGGGCAAGUCAUCCUGGCUACCCAAGUACC
pyr-1124	UAGCCAAGGAUGAUUUGCCUG	ata-MIR169a	-56.70	0.80	DangsuA,DangsuB	CCAUCUUCGAUAGCCAAGGAUGAUUUGCCUGUGAAACUCCCUUGGCAGCCGAGCUCUCUGCCACAGAGAGCGGUGUCCGGCGGUUCCAUGGGCAAGUCACCCUGGCUACCCGAGCACCU
pyr-1432	UGCCUGGCUCCCUGUAUGCCA	osa-MIR160b	-66.40	0.89	DangsuA,DangsuB	AAGGUUUGGUUUUGAUCGGCUUGAGAGCGUGCCUGGCUCCCUGUAUGCCACUCAUGUAGCCCAAUCCAUGGUGUGUUUGGAUGCUGUGGGUGGCGUGCAAGGAGCCAAGCAUGCGUGCCAUGAUCUCUCUUUCUGCCUU
pyr-1432	UGCCUGGCUCCCUGUAUGCCA	osa-MIR160c	-57.80	1.09	DangsuA,DangsuB	GGAAUGUGCCUGGCUCCCUGUAUGCCACUCAUCUAGAGCAACAAACUUCUGCGAGAGGUUGCCUAUGAUGGAUGGCGUGCACGGAGCCAAGCAUAUUCC
pyr-1432	UGCCUGGCUCCCUGUAUGCCA	osa-MIR160a	-48.80	0.94	DangsuA,DangsuB	GUGUGCCUGGCUCCCUGUAUGCCACACAUGUAGACCAACCCAUGGUGUCUGGUUGCCUACUGGGUGGCGUGCAAGGAGCCAAGCAUGC
pyr-1432	UGCCUGGCUCCCUGUAUGCCA	osa-MIR160d	-70.60	0.87	DangsuA,DangsuB	GGGGAUAUGCCUGGCUCCCUGUAUGCCACUCGCGUAGCUGCCAAACUCAGUUGAAACAACUGCCUUCUCCCGGCGAGAUUCAGGCAUUGUGUUCGUACGUUUGGCUCUACUGCGGAUGGCGUGCGAGGAGCCAAGCAUGACC
pyr-1432	UGCCUGGCUCCCUGUAUGCCA	ath-MIR160a	-46.40	1.01	DangsuA,DangsuB	GUAUGCCUGGCUCCCUGUAUGCCAUAUGCUGAGCCCAUCGAGUAUCGAUGACCUCCGUGGAUGGCGUAUGAGGAGCCAUGCAUAU
pyr-1432	UGCCUGGCUCCCUGUAUGCCA	ath-MIR160b	-41.70	1.02	DangsuA,DangsuB	GUCGUGCCUGGCUCCCUGUAUGCCACAAGAAAACAUCGAUUUAGUUUCAAAAUCGAUCACUAGUGGCGUACAGAGUAGUCAAGCAUGAC
pyr-1432	UGCCUGGCUCCCUGUAUGCCA	ath-MIR160c	-51.30	1.12	DangsuA,DangsuB	GUUAUGCCUGGCUCCCUGUAUGCCACGAGUGGAUACCGAUUUUGGUUUUAAAAUCGGCUGCCGGUGGCGUACAAGGAGUCAAGCAUGAC
pyr-1432	UGCCUGGCUCCCUGUAUGCCA	ptc-MIR160d	-52.40	0.95	DangsuA,DangsuB	AAAUGGGUUAUGCCUGGCUCCCUGUAUGCCACAGCAAAGACCAAUCUCUUCUGUCUUAGAUUGGCUGCUGCCGGUGGCGUGCGAGGAGCCAAGCAUACUCUCU
pyr-1432	UGCCUGGCUCCCUGUAUGCCA	ptc-MIR160b	-49.10	0.94	DangsuA,DangsuB	AUAUUAUAUGUGCCUGGCUCCCUGUAUGCCAUUUGCAGAGCCCAACGGAUCCUCGAUGGCCUCCGUGGAUGGCGUAUGAGGAGCCAUGCAUAUUCGCA
pyr-1432	UGCCUGGCUCCCUGUAUGCCA	pab-MIR160a	-53.80	1.08	DangsuA,DangsuB	AAAGGUUGAUGUGUGCCUGGCUCCCUGUAUGCCACAUACAAGGCCCAGUCAUAUGUUGAUUGGCUUCAUAGGUGGCUUACAAGGAGCCAAGCAUACGUUUUCUUAC
pyr-1432	UGCCUGGCUCCCUGUAUGCCA	pab-MIR160b	-56.10	0.89	DangsuA,DangsuB	GUUGGGGGCACCGCUUAUCUGCCUGGCUCCCUGUAUGCCAUCUGCGUUGCUUAUCAAGAGCGGGAUAUGCCUCACAGUUGGCAUAGAGAGAGCCAAGCAGAACUGCUGUUUCUAGC
pyr-1432	UGCCUGGCUCCCUGUAUGCCA	ptc-MIR160a	-55.80	1.07	DangsuA,DangsuB	ACAUGGGUUAUGCCUGGCUCCCUGUAUGCCACAAGCAAAGACCAAUCUUUUGUUUUAGAUUGGCUGUUGCCGGUGGCGUGCGAGGAGCCAAGCAUACUCUCU
pyr-1432	UGCCUGGCUCCCUGUAUGCCA	far-MIR160	-47.90	0.63	DangsuA,DangsuB	UUGUUGCUGAUGGGGACAUGACCUUCGCAUGCCUGUCUCAGCUCGUCGUGCAUGCCUGGCUCCCUGUAUGCCACACAUGUCCUAGUGGUUUGCUGGUUGGCUGGUGUGUUGAGGGUUCAGAACAAUCCAUUAGUCAGUUGGAAUUUGU
pyr-1432	UGCCUGGCUCCCUGUAUGCCA	mtr-MIR160b	-47.60	1.16	DangsuA,DangsuB	GUAUGUGCCUGGCUCCCUGUAUGCCAUAUAUGAAGCUCAUUGAAAAAUCAAUGACCUUUGUGGAUGGCGUAUGAGGAGCCAAGCAUAUUCC
pyr-1432	UGCCUGGCUCCCUGUAUGCCA	mtr-MIR160a	-58.50	1.24	DangsuA,DangsuB	AGAUAUAUAUACUAAUUGCGUGCCUGGCUCCCUGUAUGCCAUUUGUAGAGUUCAUCAAGAUGUUGAUGACUUUAAUGAAUGGCGUGCGAGGAGCCAUGCAUGUUGUGUAUAUUUUCUAU
pyr-1432	UGCCUGGCUCCCUGUAUGCCA	mtr-MIR160d	-50.30	1.12	DangsuA,DangsuB	UAGUGUGCCUGGCUCCCUGUAUGCCAUUUGUAGAGUCCAUCACGACAGUGAUGAACUUAGUGAAUGGCGUACUCGGAGUCAUGCAUGCUGU
pyr-1432	UGCCUGGCUCCCUGUAUGCCA	mtr-MIR160e	-47.60	1.16	DangsuA,DangsuB	GUAUGUGCCUGGCUCCCUGUAUGCCAUAUAUGAAGCUCAUUGAAAAAUCAAUGACCUUUGUGGAUGGCGUAUGAGGAGCCAAGCAUAUUCC
pyr-1432	UGCCUGGCUCCCUGUAUGCCA	vun-MIR160	-50.20	0.93	DangsuA,DangsuB	UGUUAACAUGCUUGGCGUGCCUGGCUCCCUGUAUGCCAUUUGCAGAGCCCAUCAGAACAGUGAUGGCUUUAACUAAUGGCGUGCGAGGAGUCAUGCAUGUUGUUAGUUAUUAGUUAA
pyr-1432	UGCCUGGCUCCCUGUAUGCCA	tae-MIR160	-61.90	0.74	DangsuA,DangsuB	AGAGGUGAAAACAAUGGGAUAUGCCUGGCUCCCUGUAUGCCACUCGCGUAGCUGCCAACUCCCCAAACCUUGCGUUGGCUCUACCGCGGAUGGCGUGCGAGGAGCCAAGCAUGACCGUCUCUCUCUCUCUCUCUCUCUCUCUCUCUCU
pyr-1432	UGCCUGGCUCCCUGUAUGCCA	aqc-MIR160b	-46.80	1.14	DangsuA,DangsuB	UGCCUGGCUCCCUGUAUGCCAUUUGCUUAGUCCAUUUAGUAUUAGAUGGCCUUUGUGGAUGGCGUGCGAGGAGCCAUGCAUA
pyr-1432	UGCCUGGCUCCCUGUAUGCCA	bdi-MIR160b	-67.00	0.83	DangsuA,DangsuB	UCGAUCCGAAUUAAUCGAUCAUCGGCUGCGUGCCUGGCUCCCUGUAUGCCACACAUGUAGCCCGAUCCGUGCCGAGGUUGGAUGCUGUGGGUGGCGUGCAAGGAGCCAAGCAUGCAUACAUACAAGCUCCAUGAUCGAUCCAUCCA
pyr-1432	UGCCUGGCUCCCUGUAUGCCA	bdi-MIR160c	-59.10	0.82	DangsuA,DangsuB	UAAAUUGAUGAUCUGAUCAAGACUGUGCUGUGCCUGGCUCCCUGUAUGCCACACAUGUAGCCCAGCCCAUGAAUGUGGUUUGCCUGCUGUGGGUGGCGUGCAAGGAGCCAAGCAUGCAUUACGCAUUAUGAUCAAUUAAUCUCUGGUU
pyr-1432	UGCCUGGCUCCCUGUAUGCCA	bdi-MIR160a	-77.90	0.76	DangsuA,DangsuB	UGCGGAAGGAGGUGAAAAAAAAAAUGGGAUAUGCCUGGCUCCCUGUAUGCCACUCGCGUAGCUGCCAACAACUCAGUUUGAGCUCCCCCGGCCCAAACGCAAACGUUGGCUCUACCGCGGAUGGCGUGCGAGGAGCCAAGCAUGACCGUCUCUCCCCCUCCCUCCCUCUCUCCCU
pyr-1432	UGCCUGGCUCCCUGUAUGCCA	aly-MIR160a	-67.50	1.05	DangsuA,DangsuB	CGCCUAUACAUGUAUAUAGAUGUAUAUGUAUUAUAUAUGUAUGCCUGGCUCCCUGUAUGCCAUAUGCUGAGCUCAUCGAGUAUCGAUGACCUCCGUGGAUGGCGUAUGAGGAGCCAUGCAUAUCCUCAUACAUAUAUAUACAUAAUUAUGUGAUGGUG
pyr-1432	UGCCUGGCUCCCUGUAUGCCA	aly-MIR160c	-56.60	1.01	DangsuA,DangsuB	CAUAUAAUAGUUUGUCGUCGUUAUGCCUGGCUCCCUGUAUGCCACGAGUGGAUACCGAUUUUGUUAUAAAAUCGGCUGCCGGUGGCGUACAAGGAGCCAAGCAUGACCAUAAGCAUAUG
pyr-1432	UGCCUGGCUCCCUGUAUGCCA	aly-MIR160b	-48.90	1.02	DangsuA,DangsuB	UAUAUAUAGAUUUAAGGUCGUGCCUGGCUCCCUGUAUGCCACAAGAAAACAUCGAUUUAGUUACAAAAUCGAUCACUAGUGGCGUACAGAGUAGUCAAGCAUGACCAAAGCUUUCUUGAUAUAUA
pyr-1432	UGCCUGGCUCCCUGUAUGCCA	ttu-MIR160	-50.80	0.98	DangsuA,DangsuB	AUAUGAUGUGCCUGGCUCCCUGUAUGCCACUCAUCCAGAGCAACACCUUUUGCAAUAAGGUUGCCUGCGAUGGAUGGCGUGCACGGAUCCAAGCAUAUCG
pyr-1432	UGCCUGGCUCCCUGUAUGCCA	csi-MIR160	-59.10	1.06	DangsuA,DangsuB	AUUAUACCUAUGUCUAUAUAUUUAUAAUUAUGUGCCUGGCUCCCUGUAUGCCAUUUGCAGAGUCAAUCGAAACAUCGAUGGCCUCCGUGGAUGGCGUAUGAGGAGCCAUGCAUAUUCCAUGUAUAAUAUAUACCCAUAGAUAU
pyr-1432	UGCCUGGCUCCCUGUAUGCCA	tcc-MIR160b	-59.00	0.97	DangsuA,DangsuB	UGUUAAAUGCACAUUUUGUAUGCCUGGCUCCCUGUAUGCCAUUUGCAAAGCCCAUCAAGAGUCCGGUGGCCUUCGUGGAUGGCAUGCGAGGAGCCAUGCAUGCAUUCUGCUGUCUUAACG
pyr-1432	UGCCUGGCUCCCUGUAUGCCA	ata-MIR160a	-59.70	0.88	DangsuA,DangsuB	CAAUGGGAUAUGCCUGGCUCCCUGUAUGCCACUCGCGUAGCUGCCAACUCUCCAAACCCAGCGUUGGCUCUACCGCGGAUGGCGUGCGAGGAGCCAAGCAUGACCGUCUCUCU
pyr-1432	UGCCUGGCUCCCUGUAUGCCA	ata-MIR160c	-55.10	0.89	DangsuA,DangsuB	CGUGCUUGUGUGCCUGGCUCCCUGUAUGCCACUCAUGUAGCCCAACCCGCGGCGUGAUUGGAUGCUGUGGGUGGCGUGCAAGGAGCCAAGCAUGCGUACAUACA
pyr-1432	UGCCUGGCUCCCUGUAUGCCA	ata-MIR160b	-51.50	0.92	DangsuA,DangsuB	UGAUAUGAUGUGCCUGGCUCCCUGUAUGCCACUCAUCCAGAGCAACACCUUUUGCAAUAAGGUUGCCUGCGAUGGAUGGCGUGCACGGAUCCAAGCAUAUCGAACCC
pyr-1432	UGCCUGGCUCCCUGUAUGCCA	ptc-MIR160c	-49.60	0.97	DangsuA,DangsuB	AUAUUAUAUGUGCCUGGCUCCCUGUAUGCCAUUUGCAGAGCCCACCGGUUCUUCGAUGGCCUCCGUGGAUGGCGUAUGAGGAGCCAUGCAUAUUCACA
pyr-1432	UGCCUGGCUCCCUGUAUGCCA	nta-MIR160b	-48.30	0.88	DangsuA,DangsuB	GAUCUGCAUAUGCCUGGCUCCCUGUAUGCCAUUUGCAGAGCUCAUCGGAAUACCGUUGGGUCCCCGUGAAUGGCGUAUGAGGAGCCAAGCAUAUCCCCGAUAU
pyr-1432	UGCCUGGCUCCCUGUAUGCCA	nta-MIR160c	-54.40	0.95	DangsuA,DangsuB	AACUUGGAUGUGCCUGGCUCCCUGUAUGCCACACACUUUCACCAAUCCGCGAGUUCUUUGAUUGGCUGAUCAGUGGGUGGCGUGCGAGGAGCCAAGCAUACCACAUUAUA
pyr-1432	UGCCUGGCUCCCUGUAUGCCA	nta-MIR160a	-48.90	0.92	DangsuA,DangsuB	AAUAUGCAUAUGCCUGGCUCCCUGUAUGCCAUUUGCAGAGCUCAUCGGAAUACCGUUGGGUCCCCGUGAAUGGCGUAUGAGGAGCCAAGCAUAUCCCGGAUAU
pyr-1432	UGCCUGGCUCCCUGUAUGCCA	cpa-MIR160f	-45.00	0.92	DangsuA,DangsuB	UGCCUGGCUCCCUGUAUGCCAUUUGCAGAGCCCACCGAGCAUCGCUGGCCUCCGUGGAUGGCGUAUGAGGAGCCAUGCAUA
pyr-1432	UGCCUGGCUCCCUGUAUGCCA	cpa-MIR160e	-50.40	0.97	DangsuA,DangsuB	UGCCUGGCUCCCUGUAUGCCACAAGCACAACCCGAUCUUUCCGAUGAUUGGCCGGUGCCGGUGGCGUGCGAGGAGCCAAGCAUG
pyr-1432	UGCCUGGCUCCCUGUAUGCCA	cpa-MIR160c	-45.00	0.92	DangsuA,DangsuB	UGCCUGGCUCCCUGUAUGCCAUUUGCAGAGCCCACCGAGCAUCGCUGGCCUCCGUGGAUGGCGUAUGAGGAGCCAUGCAUA
pyr-1432	UGCCUGGCUCCCUGUAUGCCA	cpa-MIR160b	-50.40	0.97	DangsuA,DangsuB	UGCCUGGCUCCCUGUAUGCCACAAGCACAACCCGAUCUUUCCGAUGAUUGGCCGGUGCCGGUGGCGUGCGAGGAGCCAAGCAUG
pyr-1432	UGCCUGGCUCCCUGUAUGCCA	cpa-MIR160a	-50.40	0.99	DangsuA,DangsuB	UGCCUGGCUCCCUGUAUGCCAUCUGCAAAGCGCCCAUCAGGAGUGGUGGCCUUGGUGGAUGGCGUGCGAGGAGCCAUGCAUG
pyr-1432	UGCCUGGCUCCCUGUAUGCCA	bdi-MIR160d	-69.90	0.90	DangsuA,DangsuB	AGAGACGAAGGUGAAGCUUAUGUUGGGAUGUGCCUGGCUCCCUGUAUGCCACUCAUCUAUAGCAACAUUCCUUCCUGAUGAGGUUGCCUAGGAUGGAUGGCGUGCACGGAGCCAAGCAUAUCCCCCUUGAUCCCAACCGUCUCUUCUCAU
pyr-1432	UGCCUGGCUCCCUGUAUGCCA	vvi-MIR160c	-57.60	0.94	DangsuA,DangsuB	AAAUGGGUUGUGCCUGGCUCCCUGUAUGCCACACGUAGAGACCACUCCCUUUCCCGGAUUGGCUAUUUGCGGGUGGCGUGCGAGGAGCCAAGCAUACCCACCAUUC
pyr-1432	UGCCUGGCUCCCUGUAUGCCA	vvi-MIR160d	-49.50	0.88	DangsuA,DangsuB	CAUACUUACAUGCCUGGCUCCCUGUAUGCCAUUUGCAAAGUCCACCCGAGGAUUGGUAGCCUUCGCGGAUGGCGUGCGAGGAGCCAUGCAUGCAUCUUGCUU
pyr-1432	UGCCUGGCUCCCUGUAUGCCA	vvi-MIR160e	-48.70	0.87	DangsuA,DangsuB	UAAGCAUAUAUGCCUGGCUCCCUGUAUGCCAUUUGCAGAGCCCACCGGCACAUCGAUGGCCUUCGUGGAUGGCGUAUGAGGAGCCAUGCAUAUGCCCCAUCU
pyr-1432	UGCCUGGCUCCCUGUAUGCCA	zma-MIR160b	-62.30	0.88	DangsuA,DangsuB	CGAUCGGCUCGUGUCGUGUGUGCCUGGCUCCCUGUAUGCCACACAUGUAGCCAACCCGUGGCGUGAUUGGAUGCUGUGGGUGGCGUGCAAGGAGCCAAGCAUGCAUAACAGGCCAUGAUCA
pyr-1432	UGCCUGGCUCCCUGUAUGCCA	sly-MIR160a	-60.50	1.03	DangsuA,DangsuB	CAAGUCGUGUACACGUAUAUGCCUGGCUCCCUGUAUGCCAUUUGCAAAGCUCACCGUAAUAUAUCGAUGGGCCUUGUUGAAUGGCGUAUGAGGAGCCAAGCAUAUUCCGAUAUCGUGUAUAUGAUGUUG
pyr-1432	UGCCUGGCUCCCUGUAUGCCA	zma-MIR160c	-49.80	0.94	DangsuA,DangsuB	AGGAUGUGCCUGGCUCCCUGUAUGCCACUCAUCUAGAGCAACGACAGCUUGGUAGGGUUGCCUAUAAGAUGGAUGGCGUGCAUGGUGCCAAGCAUAUCUC
pyr-1432	UGCCUGGCUCCCUGUAUGCCA	ghr-MIR160	-48.30	0.93	DangsuA,DangsuB	CAUCCAUGUAUGUAUGUGCCUGGCUCCCUGUAUGCCAUUUGCAGAGCCCAUUGAACUUCGAUAGCCUCCGUGAAUGGCGUAUGAGGAGCCAUGCAUGUAUUCUAUGUAUU
pyr-1432	UGCCUGGCUCCCUGUAUGCCA	zma-MIR160e	-59.80	0.92	DangsuA,DangsuB	AGGGAAUAUGCCUGGCUCCCUGUAUGCCACUCGCACGGCUACCACACCCCGGUGGCCGCUGCGGCUGGCGUGCGAGGUGCCAAGCAUGGCCCCC
pyr-1432	UGCCUGGCUCCCUGUAUGCCA	zma-MIR160d	-68.90	0.81	DangsuA,DangsuB	GGCCAGGGGCGGGAUCGAUAUGCCUGGCUCCCUGUAUGCCACUCGCAUGGCUGCCAACUCAUCAUGCAUACACUGCUAGCUAGUCGUUGGCUCCACUGCGGAUGGCGUGCGUGGAGCCAAGCAUGACCGAUCAUCUCCUCCU
pyr-1432	UGCCUGGCUCCCUGUAUGCCA	zma-MIR160g	-43.10	0.88	DangsuA,DangsuB	AUGCCUGGCUCCCUGUAUGCCACACAUGUAGCCCAACCCGUGAUGUGAUUGGAUGCUGUGGGUGGCGUGCAAGGAGCCAAGCAUGU
pyr-1432	UGCCUGGCUCCCUGUAUGCCA	rco-MIR160a	-54.10	1.10	DangsuA,DangsuB	UUGUGUGCCUGGCUCCCUGUAUGCCAUUUGUGAAGUUCAUCAGAAGCUUGGUGGUCUCCGCAGAUGGCAUGCAAGGAGCCAUGCAUGCUGCU
pyr-1432	UGCCUGGCUCCCUGUAUGCCA	rco-MIR160b	-46.90	0.88	DangsuA,DangsuB	GGUUAUGCCUGGCUCCCUGUAUGCCACAAGCUAGAGUUCAUUCCCUUCCAUGGAUUGGCUAUUGCCGGUGGCGUGCGAGGAGCCAAGCAUACUCUC
pyr-1432	UGCCUGGCUCCCUGUAUGCCA	stu-MIR160b	-42.20	0.98	DangsuA,DangsuB	UGCCUGGCUCCCUGUAUGCCACACACUUUCACCAAUUCUUUGAUUGACUGAUCAGUGGGUGGCGUGCGAGGAGCCAAGCAUA
pyr-1432	UGCCUGGCUCCCUGUAUGCCA	stu-MIR160a	-43.20	1.03	DangsuA,DangsuB	UGCCUGGCUCCCUGUAUGCCAUUUGCAAAGCUCACCGUAAUAUAUCGAUGGGCCUUGUUGAAUGGCGUAUGAGGAGCCAAGCAUA
pyr-1432	UGCCUGGCUCCCUGUAUGCCA	bna-MIR160d	-44.50	1.06	DangsuA,DangsuB	GUCAUGCCUGGCUCCCUGUAUGCCACAAGUAAAUACCGAUCUCAUUAUGAAAUCGGACACUAGUGGCGUACAGAGUAGUCAAGCAUGAC
pyr-1432	UGCCUGGCUCCCUGUAUGCCA	bra-MIR160a	-55.10	1.02	DangsuA,DangsuB	UAUGUGUAGUUGUAUAAGAUGUGUAUGCCUGGCUCCCUGUAUGCCAUCCUCUAAGCUCAUCGACCAUUGAUGACCUCCGUGAAUGGCGUAUGAGGAGCCAUGCAUAUUUUCAUAUACAUUUACAUAC
pyr-1432	UGCCUGGCUCCCUGUAUGCCA	bna-MIR160a	-51.40	0.99	DangsuA,DangsuB	GUAGUUGUAUAAGAUGUGUAUGCCUGGCUCCCUGUAUGCCAUCCUCUAAGCUCAUCGACCAUUGAUGACCUCCGUGAAUGGCGUAUGAGGAGCCAUGCAUAUUUUCAUAUACAUUUACA
pyr-1432	UGCCUGGCUCCCUGUAUGCCA	bna-MIR160b	-46.70	1.17	DangsuA,DangsuB	UCAUGCCUGGCUCCCUGUAUGCCACAAGUAGAUAUUGAUUUUGGUUGAAAAAAUCAGCUGCCAGUGGCGUACAAGGAGUCAAGCAUGA
pyr-1432	UGCCUGGCUCCCUGUAUGCCA	bna-MIR160c	-48.30	0.86	DangsuA,DangsuB	GUGUGUGCUCUUAUGGUCGUGCCUGGCUCCCUGUAUGCCACAAGUAUAUACCGAUCUCGUUACGAAAUCUGUGGCUAGUGGCGUACAGAGUAGUCAAGCAUGACCAAAGCUUUUC
pyr-1432	UGCCUGGCUCCCUGUAUGCCA	cca-MIR160b	-47.80	1.00	DangsuA,DangsuB	AGCAUAUGCCUGGCUCCCUGUAUGCCAUUUGCAAAGCGUAUCGACAUAUCGAUGGUCUAUGUGGAUGGCGUAUGCGGAGCCAAGCAUGUUCCG
pyr-1432	UGCCUGGCUCCCUGUAUGCCA	sbi-MIR160a	-44.60	0.89	DangsuA,DangsuB	UGCCUGGCUCCCUGUAUGCCACACAUGUAGCCCAACCCAUAUGCUAAGGUUGCCUGCUGUGGGUGGCGUGCAAGGGGCCAAGCA
pyr-1432	UGCCUGGCUCCCUGUAUGCCA	sbi-MIR160c	-37.30	0.85	DangsuA,DangsuB	UGCCUGGCUCCCUGUAUGCCACUCAUCUAGAUCAACAACUACCUAUGGUUGCCUAUGAUGGUUGGCGUGCACGGUGCCAAGCA
pyr-1432	UGCCUGGCUCCCUGUAUGCCA	sbi-MIR160b	-42.40	0.85	DangsuA,DangsuB	UGCCUGGCUCCCUGUAUGCCACACAUGUAGCCCAACCCGUGGCGUGAUUGGAUGCUGUGGGUGGCGUGCAAGGAGCCAAGCA
pyr-1432	UGCCUGGCUCCCUGUAUGCCA	sbi-MIR160e	-53.00	0.85	DangsuA,DangsuB	UGCCUGGCUCCCUGUAUGCCACUCGCACGGCUACCACCCCAAGAUCAUCGAUCGAUCUCGGUGGCCGCUGCGGCUGGCGUGCGAGGUGCCAAGCA
pyr-1432	UGCCUGGCUCCCUGUAUGCCA	sbi-MIR160d	-48.60	0.87	DangsuA,DangsuB	UGCCUGGCUCCCUGUAUGCCACUCGCUUAGCUGCCAACAACUCAUACUACGUUGUUAACGACGUUGGCUCUACUGCGGAUGGCGUGCGAGGAGCCAAGCA
pyr-1432	UGCCUGGCUCCCUGUAUGCCA	mdm-MIR160a	-47.60	1.19	DangsuA,DangsuB	UAUGCCUGGCUCCCUGUAUGCCACAAGCAGAAGUUCAAUUUCUUGAUUGGCUAUUGUGGGUGGCGUACAAGGAGCCAAGCAUA
pyr-1432	UGCCUGGCUCCCUGUAUGCCA	gma-MIR160d	-42.60	0.97	DangsuA,DangsuB	UGCCUGGCUCCCUGUAUGCCAUUUGUAGACCCCAUUACAAAGGUGAUGGCCUUAGCAAAUGGCGUAUGAGGAGUCAUGCAUGCUGUGUUUU
pyr-1432	UGCCUGGCUCCCUGUAUGCCA	gma-MIR160e	-50.00	0.98	DangsuA,DangsuB	UACUUGGCGUGCCUGGCUCCCUGUAUGCCAUUUGCAGAGCCCAUCAGGACAGUGAUGGCCUUAACGAAUGGCGUGCGAGGAGCCAUGCAU
pyr-1432	UGCCUGGCUCCCUGUAUGCCA	gma-MIR160f	-51.10	1.09	DangsuA,DangsuB	UACAUUGUGUGCCUGGCUCCCUGUAUGCCAUUUGUAGACCCCAUCACAAUGGUGAUGGCCUUAUCAAAUGGCGUAUGAGGAGUCAUGCAUGCUGUGU
pyr-1432	UGCCUGGCUCCCUGUAUGCCA	gma-MIR160a	-50.00	0.96	DangsuA,DangsuB	CAUGCAUACAUAUGUGUAUGUGCCUGGCUCCCUGUAUGCCAUUUGUAGAGCUCAUCGAAGCAUCAAUGACCUUUGUGGAUGGCGUAUGAGGAGCCAAGCAUAUUUCAUAUACAUACAUG
pyr-1432	UGCCUGGCUCCCUGUAUGCCA	gma-MIR160b	-48.40	1.21	DangsuA,DangsuB	AUGUGUAUGUGCCUGGCUCCCUGUAUGCCAUUUGCAUAGUUCAUUGAGCAUCAAUGAUCUUUGUGAAUGGCGUAUGAGGAGCCAAGCAUA
pyr-1432	UGCCUGGCUCCCUGUAUGCCA	gma-MIR160c	-48.60	0.95	DangsuA,DangsuB	UGCCUGGCUCCCUGUAUGCCAUUUGCAGAGCCCAUCAGGACAGUGAUGGCCUUAACGAAUGGCGUGCGAGGAGCCAUGCAUGUUGUGCGUU
pyr-1432	UGCCUGGCUCCCUGUAUGCCA	ppt-MIR160e	-54.10	0.75	DangsuA,DangsuB	CUGCAGAAAUCAAUGGGGGAAACUGGCACUGCCUGGCUCCCUGUAUGCCACUUGCGAAUUUUGGCAAAACUUGUGGCAGGGUACGUAGCUGCCAUACAGGGAGUCAGACAGACCUUGCAUCUUCCCGGAUUCUCAUGA
pyr-1432	UGCCUGGCUCCCUGUAUGCCA	ppt-MIR160f	-67.50	0.83	DangsuA,DangsuB	GUUCAUGGUUGAACGGUGGGGAGUUGGACUGCCUGGCUCCCUGUAUGCCACCUGCGGGGCUUGUCAAAAUGAUUGCCAGGCUGCAUAGCUGGCAUCCAGGGAGCCAGACAGACCUUUCUCUUGCCUCAUCCGGGUCCC
pyr-1432	UGCCUGGCUCCCUGUAUGCCA	ppt-MIR160a	-56.50	0.94	DangsuA,DangsuB	GGAGUGGAACUGCCUGGCUCCCUGUAUGCCACCUGCGGGGCUUGCCAAAGUGAUUGUCGAGCUGCAUAGCUGGCAUCCAGGGAGCCAGACAGACCUCCU
pyr-1432	UGCCUGGCUCCCUGUAUGCCA	atr-MIR160	-74.30	0.84	DangsuA,DangsuB	UGUGAUGGUUUUUUGGAGAGACAAGGUGGAAAAGGUAAAUGGGGUUAUGCCUGGCUCCCUGUAUGCCACUCUUUAGAGUCCAAUCUGAGGGCUGAUCGGCUCAUGAGGGUGGCGUGCGAGGAGCCAAGCAUACUUUCUCUCUCUAGCAAUCGAUCUUUCUCUCUCUAGUAAUCUCUCUAUCUCA
pyr-1432	UGCCUGGCUCCCUGUAUGCCA	ppe-MIR160a	-77.40	0.97	DangsuA,DangsuB	UUGGACGUGAGGCUUGAAGUGAAAGGUGAAUUGGGUUAUGCCUGGCUCCCUGUAUGCCACAAGCGGAAGCUCAAUCUGGUUCUAGAUUGGCUACUGCGGGUGGCGUACGAGGAGCCAAGCAUACCCUCUAUCUUUAUCUCUCUCUCUCUCUCUUGUUCAA
pyr-1432	UGCCUGGCUCCCUGUAUGCCA	ppe-MIR160b	-65.60	0.96	DangsuA,DangsuB	UGAACAUACGCAUAGAUAUACAAAGUAUAUAUGUGCCUGGCUCCCUGUAUGCCAUUUGCAGAGUCCCACCGAACAUCGAUGGCCUCCGUGGAUGGCGUAUGAGGAGCCAUGCAUAUAAACCCAUGUGUUUCCUGUGUGUGUUUCA
pyr-1432	UGCCUGGCUCCCUGUAUGCCA	cme-MIR160a	-55.40	1.11	DangsuA,DangsuB	GUGUGUAUGUGCCUGGCUCCCUGUAUGCCAUUUGUAGAGCUCAUCAGAAUCCGAUGGGCCUCCGCAGAUGGCGUAUGAGGAGCCAUGCAUAUAUCUUAA
pyr-1432	UGCCUGGCUCCCUGUAUGCCA	cme-MIR160b	-44.80	0.81	DangsuA,DangsuB	CUUUCAAUAUGCCUGGCUCCCUGUAUGCCAUUUGUAGAGCGCUCACCGUCAUUCCCGAUGGCCUCCGCGCAUGGCGUAUGAGGAGCCAAGCAUAUCCAUAUC
pyr-1432	UGCCUGGCUCCCUGUAUGCCA	cme-MIR160c	-47.60	1.03	DangsuA,DangsuB	UCAUCGUAAUGCCUGGCUCCCUGUAUGCCAUUUGCAAAGCCCAUCAUCUAAAAAUAGGUGGCCUUCUCGAAUGGCAUGCAAGGAGCCAUGCAUGUAUAAAUU
pyr-1432	UGCCUGGCUCCCUGUAUGCCA	smo-MIR160b	-55.00	0.89	DangsuA,DangsuB	ACAAACAAUCCCUGCCUGGCUCCCUGUAUGCCACCUGAGAAGCCCACCGAAGUGUUUCGGCAGGAUUCCUAGCUGGCGUGCGGGGAGCCAUGCAGAGCUUCUCUCUUU
pyr-1432	UGCCUGGCUCCCUGUAUGCCA	smo-MIR160a	-57.90	1.02	DangsuA,DangsuB	AAAAUCACUCUGCCUGGCUCCCUGUAUGCCAUCUGGGGGGGAUUUAUCAGCUGACGAUGAUAAGCUCCAUAGCUGGCUUACGGGGAGCCACGCAGAGUUUCUCGCU
pyr-1432	UGCCUGGCUCCCUGUAUGCCA	mdm-MIR160d	-45.40	1.03	DangsuA,DangsuB	UUAUGCCUGGCUCCCUGUAUGCCACAAGCAGAAGUUCAAUCUGUUUCUCGAUUGGCUAUUGCGGGUGGCGUAUGAGGAGUCAAGCAUAG
pyr-1432	UGCCUGGCUCCCUGUAUGCCA	lus-MIR160a	-88.80	1.12	DangsuA,DangsuB	AAUGGAACUGAAUGGAGUUGAUUACGGUUUGCCGUGCCUGGCUCCCUGUAUGCCAUCUGCAAGACCUCAUUAACAGAGUUUUGGUGGGGCUUGCUGGAUGGCGUACGAGGAGCCAUGCAUGCUUUUUUAAUUCUCAACCCACCAUCAACUCCAUCAGUUCCAUU
pyr-1432	UGCCUGGCUCCCUGUAUGCCA	lus-MIR160b	-64.20	0.87	DangsuA,DangsuB	GGUGGUGAGUUAGUGUGUAAUGUGUGUGCGUGCCUGGCUCCCUGUAUGCCAUUUGCAAGAGCUCAUCAACACAGUUUUGAUGGGGCUUGGUGGAUGGCGUACUGAGUAGCCAUGCAUGCCUAACUAUCAUUGCUCCAAAUCUAACUUCUCCAUU
pyr-1432	UGCCUGGCUCCCUGUAUGCCA	lus-MIR160e	-62.40	0.85	DangsuA,DangsuB	GGAUGGAUGAUGAACUGUGCAUGUGCCUGGCUCCCUGUAUGCCAUUCGCAGAGCUCCAACGGAUUCAUCCAUGGCCUCCGUGGAUGGCGUAUGAGGAGCCAUGCAUAUAUCUACCUACCUUUUCAUCUCAUCAUCCCUUUCC
pyr-1432	UGCCUGGCUCCCUGUAUGCCA	lus-MIR160d	-100.00	0.83	DangsuA,DangsuB	GCUAGCUAAGGUGGCGGUGGUGGGUGGUGGUGGUGGUGUUGAGUUGAGUGUGUAAUGGCUGUGUGUGCGUGCCUGGCUCCCUGUAUGCCAUUUGCAAGAGCUCAUCAACACAGUUUUGAUGGGGCUUGGUGGAUGGCGUACUGAGUAGCCAUGCAUGCUUAUAACUACCAUUAACUCCUCCAUUCAUUUAUCCCCAACCAACCAUUCCCUUCCUUCCUACUGGCACCAAUGCUGC
pyr-1432	UGCCUGGCUCCCUGUAUGCCA	lus-MIR160f	-66.00	0.90	DangsuA,DangsuB	AUGGAGAUGAUGGUGAAGUGUGCAUGUGCCUGGCUCCCUGUAUGCCAUUCGCAGAGCUCCACCGGAUUCAUCCAUGGCCUCCGUGGAUGGCGUAUGAGGAGCCAUGCAUAUAUCUAUACCUGUUUCAUCUCAUCCCUUUCCAU
pyr-1432	UGCCUGGCUCCCUGUAUGCCA	lus-MIR160i	-44.10	0.86	DangsuA,DangsuB	UAAAUGUGACGGGUUAUGCCUGGCUCCCUGUAUGCCACCGACAACCCUUCCAGUCUUUUUGUUUGAUUGAUAGUUGUCGUUGGCGUACACGGAAUCAAGCAUACCUAUUUCUUUUA
pyr-1432	UGCCUGGCUCCCUGUAUGCCA	lus-MIR160h	-65.30	0.97	DangsuA,DangsuB	GGUAGAGGGUGAAUUUGAGAAUAUGCCUGGCUCCCUGUAUGCCACAGGCAAACUCCCAAUCCCAAAUUGUUGGUUUUCUAUCAGAUUGGUUGUUGCUGGUGGCGUACAUGGAGUCAAGCAUGUAGUAUAUGCGCCCUCUUUC
pyr-1432	UGCCUGGCUCCCUGUAUGCCA	lus-MIR160j	-44.90	0.82	DangsuA,DangsuB	GAAUUGGGAUCUAAGAUUAUAGGAUAUGCCUGGCUCCCUGUAUGCCAUCGAAAACCCUUCCAAUUACUUACUGGAUUGGUAGUUGUUGUUGGCGUACACGGAAUCAAGCAUACCUCUUUCUUUUAAACCAUUUUC
pyr-1432	UGCCUGGCUCCCUGUAUGCCA	mes-MIR160h	-48.00	0.98	DangsuA,DangsuB	AUGUGCCUGGCUCCCUGUAUGCCAUUUGCAGAGCCCACCGGAGAAUCGAUGGCCUCCGUGGAUGGCGUAUGAGGAGCCAUGCAUAU
pyr-1432	UGCCUGGCUCCCUGUAUGCCA	mdm-MIR160e	-47.90	1.02	DangsuA,DangsuB	UAUGUGCCUGGCUCCCUGUAUGCCAUUUGCAGAGUUCCACCGAACAUCGAUGGCCUCCGUGGAUGGCGUAUGAGGAGCCAUGCAUAUA
pyr-1432	UGCCUGGCUCCCUGUAUGCCA	mes-MIR160a	-45.30	0.89	DangsuA,DangsuB	AUGCCUGGCUCCCUGUAUGCCACAAGCUAGAGUUCAAUCCCAUCAGUGGACUGGCUGUCGCCGGUGGCGUGCGAGGAGCCAAGCAU
pyr-1432	UGCCUGGCUCCCUGUAUGCCA	mes-MIR160b	-52.80	1.04	DangsuA,DangsuB	GUGCCUGGCUCCCUGUAUGCCACCUGCAAAGCUCAUCAAAAAGUUGGUGGCGGCCUCCGCAGGUGGCAUGCGAGGAGCCAUGCAU
pyr-1432	UGCCUGGCUCCCUGUAUGCCA	mdm-MIR160b	-45.40	1.03	DangsuA,DangsuB	UUAUGCCUGGCUCCCUGUAUGCCACAAGCAGAAGUUCAAUCUGUUUCUCGAUUGGCUAUUGCGGGUGGCGUAUGAGGAGUCAAGCAUAG
pyr-1432	UGCCUGGCUCCCUGUAUGCCA	mes-MIR160d	-48.00	1.00	DangsuA,DangsuB	AUAUGCCUGGCUCCCUGUAUGCCAUUUGCAGAGCCCACCGGAGAAUCGAUGGCCUCCGUGGAUGGCGUAUGAGGAGCCAUGCAUAU
pyr-1432	UGCCUGGCUCCCUGUAUGCCA	mdm-MIR160c	-51.70	1.08	DangsuA,DangsuB	UAUGUGCCUGGCUCCCUGUAUGCCAUUUGCAGAGUCCCACCGAACAGCGAUGGCCUCUGUGGAUGGCGUAUGAGGAGCCAAGCAUAUA
pyr-1432	UGCCUGGCUCCCUGUAUGCCA	mes-MIR160g	-52.80	1.04	DangsuA,DangsuB	GUGUGCCUGGCUCCCUGUAUGCCAUCUGCAAAGCUCAUCAGAAAGUCGGUGGCCUCCGCAGAUGGCAUGCGAGGAGCCAUGCAUGC
pyr-3138	UCACAAGUUCAUCCAAGCACCA	vvi-MIR3623	-50.60	1.05	DangsuA,DangsuB	AAGAAUUUUGAUGAUCUUCACAAGUUCAUCCAAGCACCAUCUAAAGCUCAAACAGGCCUACGGUUUUCUUCAAAACUAGGCUUAUUCAUGAUGGUGCUUGGACGAAUUUGCUAAGAACAUUAAGUUCUU
pyr-1054	UGACAACGAGAGAGAGCACGU	mes-MIR535a	-49.50	1.01	DangsuA,DangsuB	GCUUUGACAUUAUUGGUUGACAACGAGAGAGAGCACGUUUGUCAGCAUUUUGUGUUAGGGUCAUGACUGUUUACAAGCGUGCUCCCUAUCGUUGUCAUAAAUGUGCUCAAAGC
pyr-4758	UGAUUGAGCCGUGCCAAUAU	bol-MIR171a	-42.80	1.04	DangsuA,DangsuB	ACAAUGCGAGAUAUUGGUGCGGUUCAAUCAGAAAUCCACACUCUUUUGUUGUAGAGAUCGGUUUGUUUGAUUGAGCCGUGCCAAUAUCACGAGUGU
pyr-4758	UGAUUGAGCCGUGCCAAUAU	sbi-MIR171b	-76.00	0.93	DangsuA,DangsuB	AUGGCCGCCGCGCGCGACGGGGUAUUGGCGCGGUUCAAUUCGAGAGCUCGAGCCCUAGACUAGACGCCAGGGAGAGAGGGGGCUCUGCUCUCUGAUUGAGCCGUGCCAAUAUCACGUCCCGCUUGAAUGGCU
pyr-4758	UGAUUGAGCCGUGCCAAUAU	sbi-MIR171a	-74.80	0.94	DangsuA,DangsuB	UUGGUUGGCUGAGAGAGUGCGAUGUUGGCAUGGUUCAAUCAAAUCAUCGCCCGGCAAGGUGACUUAAAUUUUGCGCUUUCGAUCGAUCGAGGUGCAGGGAGGUGUUUCCAGGCACCGUGUUUGAUUGAGCCGUGCCAAUAUCACAACCUUCUCUAGCCUAU
pyr-4758	UGAUUGAGCCGUGCCAAUAU	sbi-MIR171d	-61.10	0.86	DangsuA,DangsuB	AUAAUGGAAUAGUAGCUAUGAUGUUGGCUCGGCUCACUCAGACCACCUCUCCGAUCCUCAGCUCGUGUCCAUUGCGACAUCGAUCAUGUAUAUAUGUCGCUGGUCGUGGUUUCUGAUUGAGCCGUGCCAAUAUCUCAGUACUCUUCCAUAUAU
pyr-4758	UGAUUGAGCCGUGCCAAUAU	lus-MIR171c	-44.90	0.90	DangsuA,DangsuB	UGAAAGGUGAUCACUGAGUUAUUGGCCCGGUUCACUCAGAUGGAAGAUGCCGUUUAAUUUUCUUAAUUAUUCAGCCUAGCUCAUUUUGAUUGAGCCGUGCCAAUAUCUCAAUGCUCCUUUCA
pyr-4758	UGAUUGAGCCGUGCCAAUAU	lus-MIR171b	-47.10	0.76	DangsuA,DangsuB	CUUGUUGUAUGUAUAAUGAAAGGCGCCACUGCGGUAUUGGCCCGGUUCACUCAGACACAGCUCGCUAGCGCAUAUUUAUAUAUGUUUGAUUGAGCCGUGCCAAUAUCUCAAUGCACCUUUCACUCGAUCGCAAG
pyr-4758	UGAUUGAGCCGUGCCAAUAU	sbi-MIR171i	-41.40	1.04	DangsuA,DangsuB	GUGUUGGCUCGGCUCACUCAGAAGCUGAAAUAGUAGUGAUGAAUCUAAAUGGUAGCUAUGGCGUUUCUGAUUGAGCCGUGCCAAUAUCUU
pyr-4758	UGAUUGAGCCGUGCCAAUAU	lus-MIR171e	-49.40	0.91	DangsuA,DangsuB	UUUUCUUCUUGUACAUAAUGAAAGGCGUCACUGCGGUAUUGGCCCGGUUCACUCAGACACAGUACAUGUUAUUAUUUGUUUGAUUGAGCCGUGCCAAUAUCUCAAUGCACCUUUCAUCCCCGAAAGAAAA
pyr-4758	UGAUUGAGCCGUGCCAAUAU	ppe-MIR171f	-39.30	0.98	DangsuA,DangsuB	AUAGUUACUGCGAUGUUGGCCCGGUUCACUCAGAGAAGAUGAAUUCCCUUCUGAAUUUGAUUGAGCCGUGCCAAUAUCUCAGUGCUCU
pyr-4758	UGAUUGAGCCGUGCCAAUAU	ppe-MIR171g	-46.70	1.20	DangsuA,DangsuB	AAAAAUGUGGGAUGUUGGAAUGGCUCAAUCAAAUCAAAUCUCCCAAGUAUUGGGUCCUUUGAUUUGAUUGAGCCGUGCCAAUAUCACAGUUGCCU
pyr-4758	UGAUUGAGCCGUGCCAAUAU	rco-MIR171c	-50.50	1.26	DangsuA,DangsuB	UCUGAUGUUGGCAUGGUUCAAUCAAAUCGAAGCACUCAGCUGCCUGCUGAGUUCUUUAAUCUGAUUGAGCCGUGCCAAUAUCGCCAU
pyr-4758	UGAUUGAGCCGUGCCAAUAU	rco-MIR171b	-52.00	1.41	DangsuA,DangsuB	GUACGAGAUAUUGGUGCGGUUCAAUCAGAGAUCAUUGCUCUAUAUAUAGAGCUUUUGUUGUUUGAUUGAGCCGUGCCAAUAUCACGUGCAU
pyr-4758	UGAUUGAGCCGUGCCAAUAU	rco-MIR171a	-41.30	1.01	DangsuA,DangsuB	AAACGGGAUAUUGGUCCGGUUCAAUAAGAAAACAGUGCUCAAAAUGUUAUGGGCCCUGCUUUUUGAUUGAGCCGUGCCAAUAUCACGUGCAC
pyr-4758	UGAUUGAGCCGUGCCAAUAU	rco-MIR171f	-40.10	0.84	DangsuA,DangsuB	UGUGAUAUUGGCCUGGUUCACUCAGACAUGAAACCUAUCCCUUCUCCUGCUUAUUGCCUGAAUAGGGUGUUGUUGCUAUAUGUUUUGAUUGAGCCGUGCCAAUAUCUCAGU
pyr-4758	UGAUUGAGCCGUGCCAAUAU	rco-MIR171e	-45.40	1.19	DangsuA,DangsuB	GGGGAUGUUGGAAUGGCUCAAUCAAAUCAAAUCUCCCAAAGUUUUGGGUCCUUUAAUCUGAUUGAGCCGUGCCAAUAUCCCCCA
pyr-4758	UGAUUGAGCCGUGCCAAUAU	rco-MIR171d	-41.40	0.83	DangsuA,DangsuB	UGUGAUGUUGGCCCGGUUCACUCAGACAAAAACGAUGUGUUUUCUCAAGCAUUUGUUUUUCGAAACGCUUGAUAUGUUAACACAAGCAUAAUGGCCUUUGAUUGAGCCGUGCCAAUAUCUUAGU
pyr-4758	UGAUUGAGCCGUGCCAAUAU	vvi-MIR171d	-37.90	1.00	DangsuA,DangsuB	UAGAUACACGAGAUAUUGAUACGGUUCAAUUAGAAAGCUGUGUUCUAAGUUAAGAACUCUGUUGUUUGAUUGAGCCGUGCCAAUAUCACGUCCUACUUCU
pyr-4758	UGAUUGAGCCGUGCCAAUAU	aly-MIR171c	-50.40	1.23	DangsuA,DangsuB	GGACAUCGAAUACGAGAUAUUGGUGCGGUUCAAUCAGAAAACUGUACUCUUUUGUUUUAAAGAUCGGUUUGUUUGAUUGAGCCGUGCCAAUAUCACGUGUUUAAAUAGUUU
pyr-4758	UGAUUGAGCCGUGCCAAUAU	vvi-MIR171c	-46.50	1.06	DangsuA,DangsuB	UGGUAUUACGGGAUAUUGGUGCGGUUCAAUAAGAAAGCAGUGCUCGCAAUCUUUUUGAGUUCUGGUUUUUGAUUGAGCCGUGCCAAUAUCACGUGUCAUUGCU
pyr-4758	UGAUUGAGCCGUGCCAAUAU	vvi-MIR171a	-48.60	1.10	DangsuA,DangsuB	UGGUGGGAAGCGUGAUGUUGGGACGGCUCAAUCAAACCAAAGAUCUCAAUGGUUGAGUCCUUUAAUCUGAUUGAGCCGUGCCAAUAUCAUGUUCAAUAC
pyr-4758	UGAUUGAGCCGUGCCAAUAU	vvi-MIR171j	-37.90	1.00	DangsuA,DangsuB	UAGAUACACGAGAUAUUGAUACGGUUCAAUUAGAAAGCUGUGUUCUAAGUUAAGAACUCUGUUGUUUGAUUGAGCCGUGCCAAUAUCACGUCCUACUUCU
pyr-4758	UGAUUGAGCCGUGCCAAUAU	vvi-MIR171i	-43.90	0.98	DangsuA,DangsuB	GAAGAAGGUGGGGAUGUUGGAAUGGCUCAAUCAAAUCAAAUCUCCCAAGGGUUUUGGGUCCUUUAAUCUGAUUGAGCCGUGCCAAUAUCAUCAUGUUCACUUC
pyr-4758	UGAUUGAGCCGUGCCAAUAU	ata-MIR171d	-59.90	0.95	DangsuA,DangsuB	GUCACUAUGAUGUUGGCUCGACUCACUCAGACCACGCCGGCCGGCCGGCCGGAGCCAUCCGCGGCGGUGGUUCUGAUUGAGCCGUGCCAAUAUCUUAGUGAUCU
pyr-4758	UGAUUGAGCCGUGCCAAUAU	ata-MIR171b	-62.10	1.09	DangsuA,DangsuB	GGAGAGUCCGAUGUUGGCAUGGCUCAAUCAAAUCGAGUGGGCGGCGAUCGAGGCGUGAAGAUAUGAUUGUUUAACUCGAUCUGAUUGAGCCGUGCCAAUAUCGCAAGCUCCU
pyr-4758	UGAUUGAGCCGUGCCAAUAU	tcc-MIR171e	-49.00	0.73	DangsuA,DangsuB	UUGGUUGCAAUAGUCACUACGAUGUUGGCUCGGUUCACUCAGACAAAAUCAACCCUACGCUUCUCAAGCACACACACACAAAAAAAAGAGCUUUAGAUUUUGCGUAUCUUCCAUGUGUUUUGAUUGAGCCGUGCCAAUAUCCUAGUGCCUUUUCAAUUCAC
pyr-4758	UGAUUGAGCCGUGCCAAUAU	tcc-MIR171d	-51.70	0.99	DangsuA,DangsuB	ACACAGGAGUUUGCCAUCGAGAUAUUGGUGCGGUUCAAUCGGAGAGCAUCACUCUAAAGGGUAGAGUUCUGUUAUUUGAUUGAGCCGUGCCAAUAUCACGUACAACUGCUCAUGAUU
pyr-4758	UGAUUGAGCCGUGCCAAUAU	tcc-MIR171g	-50.60	1.01	DangsuA,DangsuB	GAUUUCUUAGUUGAAAAUUUGAUGUUGGCACGGUUCAAUCGGAUCAAAUCUCUCAGUGGCUGAGUCCUUUAGUCUGAUUGAGCCGUGCCAAUAUCACAUUCAGUCACUGCAUCGG
pyr-4758	UGAUUGAGCCGUGCCAAUAU	tcc-MIR171f	-43.00	0.98	DangsuA,DangsuB	GCACAAAGAGAAAACGGGGAUGUUGGAAUGGCUCAAUCAAAUCAAAUCUCCCAAGCUUUUUAUGGGUGUUUUAAUUUGAUUGAGCCGUGCCAAUAUCACGUUAAUUACUUAUCUUCA
pyr-4758	UGAUUGAGCCGUGCCAAUAU	crt-MIR171	-76.80	0.88	DangsuA,DangsuB	AAUAUGACAGGAAUAUGCAGGAUGCUGGAAUCUUGUUUCCUAUCUUUUGGGGGUUAAAAUGAAGAUUGUGGUGACCAUUUUGGAGGAUGGAUGGGUACAACGGGAUAUUGGUGCGGUUCAAUAAGAAAACGGUGCUCAAUACUUUUUGAGCUCCGCUUUUUGAUUGAGCCGUGCCAAUAUCACGUGCCACUCGCUCUCUAA
pyr-4758	UGAUUGAGCCGUGCCAAUAU	htu-MIR171b	-48.20	0.95	DangsuA,DangsuB	UGAGAGGGAGCUGUUGAACGAGAUGUUGGUUCGGUUCAAUAAGAACUCAACGUUCAAAUGGUGCAUUGAACGUUGCUUUUUGAUUGAGCCGUGCCAAUAUCACGUGCAUGUUGCU
pyr-4758	UGAUUGAGCCGUGCCAAUAU	htu-MIR171c	-48.20	0.95	DangsuA,DangsuB	UGAGAGGGAGCUGUUGAACGAGAUGUUGGUUCGGUUCAAUAAGAACUCAACGUUCAAAUGGUGCAUUGAACGUUGCUUUUUGAUUGAGCCGUGCCAAUAUCACGUGCAUGUUGCU
pyr-4758	UGAUUGAGCCGUGCCAAUAU	htu-MIR171a	-48.20	0.95	DangsuA,DangsuB	UGAGAGGGAGCUGUUGAACGAGAUGUUGGUUCGGUUCAAUAAGAACUCAACGUUCAAAUGGUGCAUUGAACGUUGCUUUUUGAUUGAGCCGUGCCAAUAUCACGUGCAUGUUGCU
pyr-4758	UGAUUGAGCCGUGCCAAUAU	sbi-MIR171k	-48.20	1.00	DangsuA,DangsuB	CGGGAUAUUGGCGCGGUUCAAUCAGAAAGCUUGCGCUCCAAAGCCCAGGGGCUCCACUCUUUGAUUGAGCCGUGCCAAUAUCACGUC
pyr-4758	UGAUUGAGCCGUGCCAAUAU	ptc-MIR171i	-42.67	0.81	DangsuA,DangsuB	GAGUGACUAUGAUAUUGGCCUGGUUCACUCAGAUCACGACUUCAGAGCAAAGUGUCUUUCUUCUUCUUCUUUUUCUUCUUCUUCUUGUUUUAUGUUCGUUUGAUUUGAUUGAGCCGUGCCAAUAUCUCAGUACUC
pyr-4758	UGAUUGAGCCGUGCCAAUAU	mtr-MIR171d	-51.70	1.20	DangsuA,DangsuB	AAUGAGAUAUUGGCCUGGUUCACUCAGACCAAGUGAUAAACCACUAAGAUACAGUAUUGUACUUGUGUGGUUUUGGGUUUGAUUGAGCCGUGCCAAUAUCUCACU
pyr-4758	UGAUUGAGCCGUGCCAAUAU	mtr-MIR171f	-47.70	1.29	DangsuA,DangsuB	GAUGAGAUAUUGGUGCGGUUCAAUCAGAAGGCAGUGCUUUUAUAAUUCAAAAAGCUCUGUGUUAUUUGAUUGAGCCGUGCCAAUAUCACGUGUUA
pyr-4758	UGAUUGAGCCGUGCCAAUAU	bdi-MIR171d	-62.50	0.76	DangsuA,DangsuB	GCUGAGGCAAGGGAAUGAUGAAAUGGCCACUAUGAUGUUGGCUCGACUCACUCAGACGACACCGGCCGGAGCGAUGCGUGCGUGCUAGCUCGACGGCGUGUUUCUGAUUGAGCCGUGCCAAUAUCUUAGUGCUCUUUCAUGCAUAGAAGCUAUCUU
pyr-4758	UGAUUGAGCCGUGCCAAUAU	bdi-MIR171e	-47.10	1.21	DangsuA,DangsuB	GAAGGAGCGAUAUUGGUGAGGUUCAAUCCGAUGCUAGAUUUUACAUCAGUGUUAAGAUCUGUAUCUGAUUGAGCCGUGCCAAUAUCUCUCUUCUU
pyr-4758	UGAUUGAGCCGUGCCAAUAU	bdi-MIR171b	-73.80	0.86	DangsuA,DangsuB	CCAAGGAUUACUAUACUGGCUGGGAGAGUGCGAUGUUGGCACGGUUCAAUCAAAUCGGGUGGUCUCUGCAUGCACUGGCUUGCGAGCAAGCUGCGAUGAUGUUUCGCUCCAUCUGAUUGAGCCGUGCCAAUAUCGCAAGCUUCUUUGCCUAGCAACCUGUACCG
pyr-4758	UGAUUGAGCCGUGCCAAUAU	bdi-MIR171c	-45.10	0.96	DangsuA,DangsuB	CGCGGUAUUGGUGCGGUUCAAUCAGAAAGCUGGCGCUCCGGACGCAAAAGGGGUUCCUCUCUUUGAUUGAGCCGUGCCAAUAUCAC
pyr-4758	UGAUUGAGCCGUGCCAAUAU	mdm-MIR171g	-37.30	1.43	DangsuA,DangsuB	GAUGUUGGUAUGGUUCAAUCAAAUAAAAUCUCUCAAAAUUUGGGUCCUUUAAUUUGAUUGAGCCGUGCCAAUAUC
pyr-4758	UGAUUGAGCCGUGCCAAUAU	mdm-MIR171f	-44.50	0.97	DangsuA,DangsuB	CAGUUUGAACGGGAUAUUGGUCCGGUUCAAUAAGAAAACAGUGCUCUAAAAGUGCUUGAGCUCUGCUUUUUGAUUGAGCCGUGCCAAUAUCACGUGCCACUG
pyr-4758	UGAUUGAGCCGUGCCAAUAU	ppe-MIR171c	-46.40	1.22	DangsuA,DangsuB	UGAUGAUGUUGAUGUUGGCGUGGCUCAAUCAAAUCAAACUUCUCAACUGUUUAUUGGGUCCUUUAAUUUGAUUGAGCCGUGCCAAUAUCAUUAUCAGUC
pyr-4758	UGAUUGAGCCGUGCCAAUAU	ppe-MIR171a	-57.00	1.12	DangsuA,DangsuB	AAUGGAUCGGUUUAACGGGAUAUUGGUCCGGUUCAAUAAGAAAGCAGUGCUCUAAGUGCUUGAGCUCUGCUUUUUGAUUGAGCCGUGCCAAUAUCACGUGCCACUGUUCCUUUAU
pyr-4758	UGAUUGAGCCGUGCCAAUAU	mdm-MIR171o	-38.90	1.34	DangsuA,DangsuB	UGGGAUGUUGGUAUGGUUCAAUCAAAUAAAAUCUCUCAAAAUUUGGGUCCUUUAAUUUGAUUGAGCCGUGCCAAUAUCACA
pyr-4758	UGAUUGAGCCGUGCCAAUAU	mdm-MIR171n	-38.90	1.34	DangsuA,DangsuB	UGGGAUGUUGGUAUGGUUCAAUCAAAUAAAAUCUCUCAAAAUUUGGGUCCUUUAAUUUGAUUGAGCCGUGCCAAUAUCACA
pyr-4758	UGAUUGAGCCGUGCCAAUAU	mdm-MIR171m	-40.80	1.27	DangsuA,DangsuB	UGGGAUGUUGGAAUGGCUCAAUCAAAUAAAAUCUCCCAAAGGAUUGGGUCUUUUAAUUUGAUUGAGCCGUGCCAAUAUCACA
pyr-4758	UGAUUGAGCCGUGCCAAUAU	mdm-MIR171h	-39.20	1.35	DangsuA,DangsuB	GAUGUUGGAAUGGCUCAAUCAAAUAAAAUCUCCCAAAGGAUUGGGUCUUUUAAUUUGAUUGAGCCGUGCCAAUAUC
pyr-4758	UGAUUGAGCCGUGCCAAUAU	mes-MIR171j	-49.60	0.84	DangsuA,DangsuB	GUGAAAUAGCGAUUGUGAUAUUGGCCUGGUUCACUCAGACGUGGAAAACCUACCCUUUUCUCGGCUUUAUUUUGCUUGGACGAUGUUGUCUUGCUCUGAUUGAGCCGUGCCAAUAUCUCAGUGCUCUUUCAU
pyr-4758	UGAUUGAGCCGUGCCAAUAU	stu-MIR171e	-34.20	1.27	DangsuA,DangsuB	UGUUGGUGUGGUUCAAUUAGAUAACAAUCUCCACAUAAGAUUAUAGAGUUUGUUAUUUGAUUGAGCCGUGCCAAUAUC
pyr-4758	UGAUUGAGCCGUGCCAAUAU	zma-MIR171b	-47.00	0.96	DangsuA,DangsuB	CGGGAUAUUGGCGCGGUUCAAUCAGAAAGCUUGCGCUCCAGGCCCGAGGGGCUCCACUCUUUGAUUGAGCCGUGCCAAUAUCACG
pyr-4758	UGAUUGAGCCGUGCCAAUAU	sly-MIR171a	-45.40	1.06	DangsuA,DangsuB	UGAAACAGUAACUUUGAUAUUGGCCUGGUUCACUCAGACAACAAAAUGUAAACUAUAUUUGAAUGGUUGAGUUUUCGUUUUUCGUUUGAUUGAGCCGUGCCAAUAUCUCAGUUUCUCUUUCA
pyr-4758	UGAUUGAGCCGUGCCAAUAU	zma-MIR171f	-70.50	0.88	DangsuA,DangsuB	UUGGUUGUUGGCUGAGAGAGUGCGAUGUUGGCAUGGCUCAAUCAACUCGCCGGCCGCGGGUGGCUUAUAGCUUAAUUCUGCGCAUUCGAUCGAGGUGCGGGCGCAGUGUUUAAUUGAUUGAGCCGUGCCAAUAUCACAACCUUCUCUAGCCUAUA
pyr-4758	UGAUUGAGCCGUGCCAAUAU	zma-MIR171e	-59.50	0.96	DangsuA,DangsuB	AGAAAUGGAAUAGUAGCUAUGAUGUUGGCUCGGCUCACUCAGACGACGUACGCGCGCGAGAUCAUGUGCUAUGCCGCUGCUGUUUCUGAUUGAGCCGUGCCAAUAUCUUAGUACUCUUCCAUGCAU
pyr-4758	UGAUUGAGCCGUGCCAAUAU	zma-MIR171d	-51.80	0.89	DangsuA,DangsuB	AGAAAUGGAAGUGUAACUAUGGUGUUGGCUCGGCUCACUCAGAAGUUGAAGCCGAAUCCAAAUGGUAGCUGCCGGCGUUUCUGAUUGAGCCGUGCCAAUAUCUCAGUACUCUUUCAUGCUG
pyr-4758	UGAUUGAGCCGUGCCAAUAU	ssl-MIR171a	-44.30	1.14	DangsuA,DangsuB	CGAGAUAUUGGUGCGGUUCAAUUUGAAAGCCGUGCUCAAUAGGCUUAGAGCUCGGUUAUUUGAUUGAGCCGUGCCAAUAUCACG
pyr-4758	UGAUUGAGCCGUGCCAAUAU	zma-MIR171j	-68.10	0.84	DangsuA,DangsuB	AAUGGCCGCGAGCUAGACGGGGUAUUGACGCGGUUCAAUUCGAGAGCUCGAGCCCUAGCAGAGGCCAGGGGGGGUGGGGCUCUGCUCUCUGAUUGAGCCGUGCCAAUAUCACGUCCCACUCGCCCUCGC
pyr-4758	UGAUUGAGCCGUGCCAAUAU	zma-MIR171i	-52.90	0.96	DangsuA,DangsuB	CUGGUUGGCUGAGAGAGUGCGAUGUUGGCACGGUUCAAUCAAAUCGCCGGCCGGGUUGACUUGUUGAUUGAGCCGUGCCAAUAUCACAACCUUCUCUAGCCUAG
pyr-4758	UGAUUGAGCCGUGCCAAUAU	cme-MIR171b	-46.60	1.19	DangsuA,DangsuB	UUAACGGGAUAUUGGUGCGGUUCAAUAAAAAGGUAAUACUCAAAAUAAGCGUUGGGUUUUGCUUUUUGAUUGAGCCGUGCCAAUAUCACGUGUCAACGA
pyr-4758	UGAUUGAGCCGUGCCAAUAU	cme-MIR171c	-40.70	1.20	DangsuA,DangsuB	GUCUGAUGUUGGAACGGUUCAAUCAAAUCAAAUCUCCUAUGAAUUGGGUCUUUUAAUUUGAUUGAGCCGUGCCAAUAUCGACGAUUGA
pyr-4758	UGAUUGAGCCGUGCCAAUAU	cme-MIR171f	-32.70	1.02	DangsuA,DangsuB	CUCUGAUAUUGGCCCGGUUCACUCAAAUACAUAACAUAUUCAUCAUUUACGUUAUAUUUGAUUGAGCCGUGCCAAUAUCUCAGUAUACU
pyr-4758	UGAUUGAGCCGUGCCAAUAU	hpa-MIR171a	-48.10	0.94	DangsuA,DangsuB	UGAGGGGGAGCUGUUGAACGAGAUGUUGGUUCGGUUCAAUAAGAACUCAACGUUCAAAUAGUGCAUUGAACGUUGCUUUUUGAUUGAGCCGUGCCAAUAUCACGUGCAUGUUGCU
pyr-4758	UGAUUGAGCCGUGCCAAUAU	nta-MIR171a	-46.40	1.19	DangsuA,DangsuB	AUACACGAGAUAUUGGUGCGGUUCAAUGAGAAAGCAGUACUCGACAAAUUUUGACUCUACUUUUUGAUUGAGCCGUGCCAAUAUCACGUGUAGCA
pyr-4758	UGAUUGAGCCGUGCCAAUAU	nta-MIR171c	-45.10	1.02	DangsuA,DangsuB	ACAGUAACUCAGGUAUUGGCCUGGUUCACUCAGACAACAAGAUGAAACUAUUUGAAUAUUGAAUGGUGGAGUUUUGGUUUGAUUGAGCCGUGCCAAUAUCUCAGUUUCUC
pyr-4758	UGAUUGAGCCGUGCCAAUAU	tae-MIR171a	-55.20	0.75	DangsuA,DangsuB	UGGAAUGGUCACUAUGAUGUUGGCUCGACUCACUCAGACCACGCCUGCCGGCCGGCCGUAGCCAUGCAUCUGCAUGCGGUGGUGGCUCUGAUUGAGCCGUGCCAAUAUCUCAGUGCUCUUUCAUGCAUGC
pyr-4758	UGAUUGAGCCGUGCCAAUAU	pde-MIR171	-53.80	1.25	DangsuA,DangsuB	GAAAGAAUGUGAUGUUGGCUAGGCUCAAUCGGAUUGUAACGCCCACGGAAUUUGGUCUUGUGAUCUGAUUGAGCCGUGCCAAUAUCACAUUCUAAC
pyr-4758	UGAUUGAGCCGUGCCAAUAU	ptc-MIR171e	-38.70	1.02	DangsuA,DangsuB	GUGGAAAUUUGAUGUUGGCAGAGCUCAAUCAAAUCAAAGCACUCAAUGGUUGGGUUCUUUCAUCUGAUUGAGCCGUGCCAAUAUCGCAUUAAAU
pyr-4758	UGAUUGAGCCGUGCCAAUAU	ptc-MIR171f	-59.20	1.04	DangsuA,DangsuB	GUGUCAUUGCGAUGUUGGCCCGGUUCACUCAGAGAAAAGACACCAUUUUUUUUCAAGAAGAUCAUCAAAGCUUGAAAGAAUAAUGGUGGUCGGUCGUCUCUGAUUGAGCCGUGCCAAUAUCUUAGUGCUC
pyr-4758	UGAUUGAGCCGUGCCAAUAU	ptc-MIR171g	-43.10	1.03	DangsuA,DangsuB	GAAAGUGGGGGAUGUUGGGAUGGCUCAAUCAUGUCAAAUCUCCCAAAUUAUGAUGUUGGGUCUUUUAAUCUGAUUGAGCCGUGCCAAUAUCACACUUCUU
pyr-4758	UGAUUGAGCCGUGCCAAUAU	mes-MIR171b	-54.30	1.47	DangsuA,DangsuB	AAUACGAGAUAUUGGUGCGGUUCAAUCUGAUAGCAGUGCUCUAUGCAUAGAGCUUUGUUGUUUGAUUGAGCCGUGCCAAUAUCACGUAUU
pyr-4758	UGAUUGAGCCGUGCCAAUAU	mes-MIR171c	-53.00	1.43	DangsuA,DangsuB	ACGAGAUAUUGGUGCGGUUCAAUCAGAGAGCAGUGCUCUAUGAAUAGAGCUUUGUUGUUUGAUUGAGCCGUGCCAAUAUCACGU
pyr-4758	UGAUUGAGCCGUGCCAAUAU	ptc-MIR171b	-53.20	1.40	DangsuA,DangsuB	UUAUAUAUAACGAGAUAUUGGUGCGGUUCAAUCAGAUAGUAAUGCUCCAUAAGCAUAGAGCUCUAUUGUUUGAUUGAGCCGUGCCAAUAUCACGUAUAUGUUG
pyr-4758	UGAUUGAGCCGUGCCAAUAU	osa-MIR171b	-54.60	1.01	DangsuA,DangsuB	GCGACGACGGGAUAUUGGGGCGGUUCAAUCAGAAAGCUUGUGCUCCGGAAGCGAGGAGCUCUACUCUUUUGAUUGAGCCGUGCCAAUAUCACGUCGCAUC
pyr-4758	UGAUUGAGCCGUGCCAAUAU	osa-MIR171c	-51.60	0.96	DangsuA,DangsuB	GUGGGAACGGGAUAUUGGUGCGGUUCAAUCAGAAAGCUUGUGCUCCGAAGGCGAGGGGCUCCACUCUUUGAUUGAGCCGUGCCAAUAUCACGUCGCCUU
pyr-4758	UGAUUGAGCCGUGCCAAUAU	ptc-MIR171h	-44.70	1.04	DangsuA,DangsuB	GAAAGUGGGGGAUGUUGGGAUGGCUCAAUCAUAUCAAAUCUCCCAAACUAUGAUGUUGGGUCGUUUAAUCUGAUUGAGCCGUGCCAAUAUCACACUAACU
pyr-4758	UGAUUGAGCCGUGCCAAUAU	osa-MIR171e	-57.60	0.96	DangsuA,DangsuB	UGGUAGCUAUGAUGUUGGCUCGGCUCACUCAGACGGCAUUGGCGUGAUGCAAAGCAUGCAUGCGUGCUUGCUAGCUCACUUGUGUUUCUGAUUGAGCCGUGCCAAUAUCUUAGUGCUCU
pyr-4758	UGAUUGAGCCGUGCCAAUAU	mes-MIR171h	-45.50	1.03	DangsuA,DangsuB	UUGAAAGUGCCAUUGUGAUGUUGGCUCGGUUCACUCAGACAAAUUACUAUGUUUUACUACAAGCAUGUUAUGGUCUUUGAUUGAGCCGUGCCAAUAUCUUAGUGCUCUUUCAA
pyr-4758	UGAUUGAGCCGUGCCAAUAU	mes-MIR171i	-57.50	1.01	DangsuA,DangsuB	UGAAAUAGCGAUUGUGAUAUUGGCCUGGUUCACUCAGACAUGGAAAACCUACCCUUAAUUUCUUGCUUCUUUUGCUUGAGUGAAGGGUGGUGUUGUCUUGUUUUGAUUGAGCCGUGCCAAUAUCUCAGUUCUCUUUCA
pyr-4758	UGAUUGAGCCGUGCCAAUAU	ath-MIR171c	-51.80	1.10	DangsuA,DangsuB	UGAGCGCACUAUCGGACAUCAAAUACGAGAUAUUGGUGCGGUUCAAUCAGAAAACCGUACUCUUUUGUUUUAAAGAUCGGUUUAUUUGAUUGAGCCGUGCCAAUAUCACGCGUUUA
pyr-4758	UGAUUGAGCCGUGCCAAUAU	stu-MIR171a	-32.70	0.96	DangsuA,DangsuB	UAUUGGCCUGGUUCACUCAGACAACAAAAUGAAACUAUAUUUAAAUGGUGGAGUUUCUGUUUUCCGUUUGAUUGAGCCGUGCCAAUAUC
pyr-4758	UGAUUGAGCCGUGCCAAUAU	mes-MIR171g	-45.80	1.17	DangsuA,DangsuB	AGAGGUGAUGUUGGGAUGGCUCAAUCAAAUCAAAUCUCCCAAGGUUUGGGUCCUUUAAUCUGAUUGAGCCGUGCCAAUAUCCCUCU
pyr-4758	UGAUUGAGCCGUGCCAAUAU	cpa-MIR171a	-36.50	1.26	DangsuA,DangsuB	UGUUGGAAUGGCUCAAUCAAAUCAAAUCUCCAAAGUCUUUGAUUUUGGGUCUUUUAAUUUGAUUGAGCCGUGCCAAUAUC
pyr-4758	UGAUUGAGCCGUGCCAAUAU	cpa-MIR171c	-38.40	1.10	DangsuA,DangsuB	UGUUGGCAUGGUUCAAUCAAAUUAAAGCUCUCAUUAAUGGCUGGAGAUAUUCAUGUUGAGUUCUUUUAGUCUGAUUGAGCCGUGCCAAUAUC
pyr-4758	UGAUUGAGCCGUGCCAAUAU	cpa-MIR171b	-41.60	1.26	DangsuA,DangsuB	UAUUGGUGCGGUUCAAUCGGAGAGCAUUACUCUAAAGUGUAGAGACGUGUUGUUUGAUUGAGCCGUGCCAAUAUC
pyr-4758	UGAUUGAGCCGUGCCAAUAU	cpa-MIR171d	-31.60	0.99	DangsuA,DangsuB	UAUUGGUCCGGUUCAAUAAGAAAACAGUGCUCUGAUCGUGUUGAGUUCUGCUUUUUGAUUGAGCCGUGCCAAUAUC
pyr-4758	UGAUUGAGCCGUGCCAAUAU	bna-MIR171d	-42.80	1.04	DangsuA,DangsuB	ACAAUGCGAGAUAUUGGUGCGGUUCAAUCAGAAAUCCACACUCUUUUGUUGUAGAGAUCGGUUUGUUUGAUUGAGCCGUGCCAAUAUCACGAGUGU
pyr-4758	UGAUUGAGCCGUGCCAAUAU	bna-MIR171e	-41.20	1.08	DangsuA,DangsuB	CAAUACGAGAUAUUGGUGUGGUUCAAUCAGAAAACCACACUCUUUUGUUGUAGAGAUCGGUUUGUUUGAUUGAGCCGUGCCAAUAUCACGAG
pyr-4758	UGAUUGAGCCGUGCCAAUAU	bra-MIR171a	-39.70	1.10	DangsuA,DangsuB	CGAGAUAUUGGUGUGGUUCAAUCAGAAAACCACACUCUUUUGUUGUAGAGAUCGGUUUGUUUGAUUGAGCCGUGCCAAUAUCACG
pyr-4758	UGAUUGAGCCGUGCCAAUAU	lja-MIR171a	-50.60	1.12	DangsuA,DangsuB	AUGAAGUAGCUAUUGCGAUAUUGGCUUGGUUCACUCAGACAAAACACAUACACACAGAAAAUGUGGAUUAUAUAUAUGUUUUGGUUUUGAUUGAGCCGUGCCAAUAUCUCACUGCUACUUCAU
pyr-4758	UGAUUGAGCCGUGCCAAUAU	hvu-MIR171	-91.90	0.92	DangsuA,DangsuB	GCGGGUUGAUGGCCAGGAACUCCGACAAGAGGAGGAUGCUGAAACGGUCACUAUGAUGUUGGCUCGACUCACUCAGACCACGCCGGAGGGAGCCAUCUGCGGCGGCGGUUCUGAUUGAGCCGUGCCAAUAUCUUAGUGCUCUUUCAUGCUCGUCCCUUGUCGCCAUCACCCAC
pyr-4758	UGAUUGAGCCGUGCCAAUAU	gma-MIR171q	-47.90	1.11	DangsuA,DangsuB	UGAGAACUUGAGAUAUUGGUGCGGUUCAAUCAGAAGGCAGUGUUUUAUGAUCCAAAAACUCUGUGUUAUUUGAUUGAGCCGUGCCAAUAUCACAUGUAAUUCAUCUCGG
pyr-4758	UGAUUGAGCCGUGCCAAUAU	ptc-MIR171a	-48.50	1.18	DangsuA,DangsuB	UCAGAGAAAACGGGAUAUUGGUACGGUUCAAUCAGAAAGUAAUGCUCCCAAAAGUAUAGAGUACUAUUGUUUGAUUGAGCCGUGCCAAUAUCACGUACACUCAU
pyr-4758	UGAUUGAGCCGUGCCAAUAU	gma-MIR171u	-38.40	0.98	DangsuA,DangsuB	UGUGGGGAUGUUGGAACAGUUCAAUCAAAUCAAAUUUCCUAAUGAUUGGGUGAUGGUUGGAUUCUUUGAUAUGAUUGAGCCGUGCCAAUAUCAAUUCCUACU
pyr-4758	UGAUUGAGCCGUGCCAAUAU	gma-MIR171c	-46.50	1.19	DangsuA,DangsuB	UUAAGAACUUGAGAUAUUGGUGCGGUUCAAUCAGAAGGCAGUGUUUUAUGAUCCAAAAGCUCUGUGUUAUUUGAUUGAGCCGUGCCAAUAUCACAUGUUAUUGA
pyr-4758	UGAUUGAGCCGUGCCAAUAU	gma-MIR171f	-43.40	1.21	DangsuA,DangsuB	GAGAUAUUGGUACGGUUCAAUCAGAAGGCAGUGCUUUAUGAUUUCAAAGCUCUCUUAUUUGAUUGAGCCGUGCCAAUAUCACAUGCAAAC
pyr-4758	UGAUUGAGCCGUGCCAAUAU	gma-MIR171g	-36.70	1.36	DangsuA,DangsuB	UGAUGUUGGCUUGGCUCAAUCAAAUUAAAAUUUUUAAAGAUUUUGUUAACUUUUUUGAUCUGAUUGAGCCGUGCCAAUAUCAUAUUCAUC
pyr-4758	UGAUUGAGCCGUGCCAAUAU	gma-MIR171e	-39.80	0.97	DangsuA,DangsuB	ACAUGGGGAUGUUGGACGGUUCAAUCAAAUCAAAUCUCCUAAUGGCUGGGUCCUUUGGUAUGAUUGAGCCGUGCCAAUAUCAAAUCCUGC
pyr-4758	UGAUUGAGCCGUGCCAAUAU	gma-MIR171j	-60.70	1.01	DangsuA,DangsuB	AUGAAGUAGUUAUUGUGAUAUUGGCCUGGUUCACUCAGACAUGUAUACCACGGCACGGUUGUGUCCUUGCUAGAAAGAUUUAAAACAAAAUACAUGUUGUGAUUGUGGUUUUGGGUUUGAUUGAGCCGUGCCAAUAUCUCAGUGCUAUUUCAU
pyr-4758	UGAUUGAGCCGUGCCAAUAU	far-MIR171	-62.40	0.92	DangsuA,DangsuB	GAGUGCGAUGUUGGCAUGGUUCAAUCAACAAUCGAGUGGUCUCUGCAUAGCUUCCUUGCUAGCGUGGUGGCAUGCUGCUUUGCUUGAUCUGAUUGAGCCGUGCCAAUAUCGCAAGCUUCCUGCCUAGCCC
pyr-4758	UGAUUGAGCCGUGCCAAUAU	gma-MIR171o	-48.20	1.24	DangsuA,DangsuB	UAAGGGCUUGAGAUAUUGGUACGGUUCAAUCAGAAGACAGUGCUUUAUGAUUCUAAAGCUCUCUUAUUUGAUUGAGCCGUGCCAAUAUCACAUGCAAACUUU
pyr-4758	UGAUUGAGCCGUGCCAAUAU	aqc-MIR171d	-38.90	0.97	DangsuA,DangsuB	GAUGUUGGUCGGGUUCAAUCAGAAACAAGCAUUUGUAAAAGAAUGCUAUAGAUUUCUACAGAGCCAUAUUACUGGUGUACUUUUGAUUGAGCCGUGCCAAUAUCUU
pyr-4758	UGAUUGAGCCGUGCCAAUAU	aqc-MIR171b	-35.80	1.08	DangsuA,DangsuB	GGUGUUGGAAUGGCUCAAUCAAAUGAAAGCUCUCAAAGAUUGGGUCCUUUAAUCUGAUUGAGCCGUGCCAAUAUCAC
pyr-4758	UGAUUGAGCCGUGCCAAUAU	aqc-MIR171a	-45.10	1.19	DangsuA,DangsuB	GAUGUUGGCUCGGUUCAUUCAGACUUAUAUAUAUACCACCAAUGUUUACAGAGAUGUAAAUAAAAGUGGUGCAGUUGUUUGAUUGAGCCGUGCCAAUAUCUU
pyr-4758	UGAUUGAGCCGUGCCAAUAU	osa-MIR171d	-57.10	0.87	DangsuA,DangsuB	UUGUAGCUAUGAUGUUGGCCCGGCUCACUCAGAUGGAUCAUCGGUGCAGAAGAGUGCAUGAAUCUGAUGCAGUCUCAGUGUAGUAUGCUCCAUGCUGGAACUUCUGAUUGAGCCGUGCCAAUAUCUCAGCACCAU
pyr-4758	UGAUUGAGCCGUGCCAAUAU	mes-MIR171k	-42.00	1.11	DangsuA,DangsuB	AAGAGAGAUGUUGGAAUGGCUCAAUCAAAUCAAAUCUCUCAAGGGUUCUUGGGUCCUUUAAUCUGAUUGAGCCGUGCCAAUAUCCCUCUU
pyr-4758	UGAUUGAGCCGUGCCAAUAU	osa-MIR171f	-60.50	1.01	DangsuA,DangsuB	GGGAGAGUGCGAUGUUGGCAUGGUUCAAUCAAACCGGGCAAACUUAUGCACUAGCUAAGCAAGAUGCAGGGAUAUGCAGUAUGGUUUUGUUUGGUCUGAUUGAGCCGUGCCAAUAUCACAAGCUUGC
pyr-4758	UGAUUGAGCCGUGCCAAUAU	tcc-MIR171h	-49.30	0.93	DangsuA,DangsuB	CUACAUGAAAUAGUAACUGUGAUAUUGGCCUGGUUCACUCAGACAUUCAAUGACAGCACUUUCUGAAGAGUAAAGCAUUUUGCUGGUUUUGGUCUGAUUGAGCCGUGCCAAUAUCUUAGAACUCUUUCAUAUCUC
pyr-861	CUCAGGAGAGAUGACACCGAC	sbi-MIR1432	-98.50	0.91	DangsuA,DangsuB	GAUAGGACAUAGGAGGCGAGAGGGACGACGAGCCGUUGGUUUGUGGGUGUGCGUCCUAUGCUCAGGAGAGAUGACACCGACGUCGGACGGACCGGUCGAUCCGCGCCGUGUCUGUCCGUCCGAAGUGGGUGUCAUCUCGCCUGAAGCAUAGGACUUACCAGCCCAGUACAUCUCCCUGUUUUCA
pyr-861	CUCAGGAGAGAUGACACCGAC	zma-MIR1432	-56.00	1.00	DangsuA,DangsuB	GCUCAGGAGAGAUGACACCGACGCCAGACGGACCGGUCCAUCCGCGCCGUGUCUGUCCGUCUGAAGUGGGUGUCAUCUCGCCUGAAGCA
pyr-3964	UUCCACAGCUUUCUUGAACUG	bdi-MIR396c	-74.50	0.99	DangsuA,DangsuB	CGGUAGCAAAUCGCAUGGCCCUCUCUGUGAUCUUCCACAGCUUUCUUGAACUGCUCGGAUCUGCCUAAUUAGAUCACGGCUUGGGUUUGCACGAGAGGGCAGUUCAAUAAAGCUGUGGGAAAUUUCAGAGAGAGGCCAAUUGAUCGGCACAUA
pyr-3964	UUCCACAGCUUUCUUGAACUG	bdi-MIR396d	-56.30	0.85	DangsuA,DangsuB	UAUUGGAUGCAUGCAUGGCCCUCUUUGCUAUCUUCCACAGCUUUCUUGAACUGCAUCUGCAAUGGAUGCUACUUAGCUUAUGCUUAACUGCAAGAGUGCUGUUCAAUAAAGCUGUGGGAAAUUGCAGAGAGAGACCAAUUGGGCAGCUUAAU
pyr-3964	UUCCACAGCUUUCUUGAACUG	tcc-MIR396a	-68.20	1.10	DangsuA,DangsuB	CCGAGGUUCUCUUUGUGAUUUUCCACAGCUUUCUUGAACUGUGUCGAGAAAAUCUGCAUUCCCAUGCAAUGGUAUACAUACAACAUUCGGCACCGGGAAAACACAGUUCAUGAGAGCUGUGGAAAAUUACUGAGAGGAUCUUCUUU
pyr-3964	UUCCACAGCUUUCUUGAACUG	amg-MIR396	-62.30	0.97	DangsuA,DangsuB	CUAUGGCUCUCUCUGUAUUCUUCCACAGCUUUCUUGAACUGCAUCGAUCGAAGAAAGAGCAAGCUUUGUUCUCUCUUACAUGCAUGCCAAAUCGUCUUCUUGCGGUUCAAUAAAGCUGUGGGAAGAUACAGAUAGGGUCAACCAC
pyr-3964	UUCCACAGCUUUCUUGAACUG	ata-MIR396e	-50.70	1.03	DangsuA,DangsuB	CUUUGCUGUCUUCCACAGCUUUCUUGAACUGCAUCUGCAAUUGGUGGAUGCUAGCUUCUGCUCGCAAGAUCUGCAGUUCAAUAAAGCUGUGGGAAAUUGCAGAGAG
pyr-3964	UUCCACAGCUUUCUUGAACUG	lja-MIR396	-45.00	1.02	DangsuA,DangsuB	GUCCUCUUUGUAUUCUUCCACAGCUUUCUUGAACUGCAUUCAAUUGCAUGCAUGCCAUGACACUCUUAUUUUGCGGUUCAAUAAAGCUGUGGGAAGAUAUAGAUAGGG
pyr-3964	UUCCACAGCUUUCUUGAACUG	cpa-MIR396	-39.00	1.22	DangsuA,DangsuB	UUCCACAGCUUUCUUGAACUGCAUGAUCUGUAUUAGGAGAAAAUUCUGUAUAUCGAUUGCGGUUCAAUAAAGCUGUGGGAAG
pyr-3964	UUCCACAGCUUUCUUGAACUG	osa-MIR396a	-60.20	0.90	DangsuA,DangsuB	CUUUGUGAUCUUCCACAGCUUUCUUGAACUGCACGCAUGAUGAAUAAUCCCUUUGGUUAAUUGUGAUCUGGUCUCUGAGAGAUCGUAGUUAGACUCGAUCGGUUGCAUUGGCAUCAGAGAGAGCAGUUCAAUAAAGCUGUGGGAAAUUGCAGAG
pyr-3964	UUCCACAGCUUUCUUGAACUG	bcy-MIR396a	-58.90	1.02	DangsuA,DangsuB	CCCUCUUUGUAUUCUUCCACAGCUUUCUUGAACUGCAUCUCUUAGUUUUGUUUUUGCAUGCCACGGUUUCUGGCUGGACGACAUGUGGAUUUGCGGUUCAAUAAAGCUGUGGGAAGAUACAGACAGGG
pyr-3964	UUCCACAGCUUUCUUGAACUG	osa-MIR396b	-52.20	1.04	DangsuA,DangsuB	CUUUGUGGUCUUCCACAGCUUUCUUGAACUGCAUCUUUGAGAGAGAUUAGCAUCCCUAUGUGUGGAUUUUGCUUGCACGAGUGUGCAGUUCAAUAAAGCUGUGGGAAAUUACAGAG
pyr-3964	UUCCACAGCUUUCUUGAACUG	cme-MIR396b	-54.10	0.87	DangsuA,DangsuB	UUUGUAUUCUUCCACAGCUUUCUUGAACUGCAUCCCUUCCUGAACUCAAUUCGCUCUUAAUUUCCCCUUUCUCGAUCUCUCGAUCGAUCUCAAAGCGUUUUUUGUUCAUCGAUUUUGUUGCGGUUCAAUAAAGCUGUGGGAAGAUACAGUC
pyr-3964	UUCCACAGCUUUCUUGAACUG	sly-MIR396a	-57.80	1.34	DangsuA,DangsuB	UGAUUCUUUGUGUACUUUUCCACAGCUUUCUUGAACUGCAUACAUAUAACAAAAAAAUCUGAUUUUUUUUUGAUUUUUUUUUACUUUUAUAAAGAAAAAAUUUAGAUGGAAAGAAUUAAAUUGUUGCGGUUCAAUAAAGCUGUGGGAAGAUACAUAUAGGAUCA
pyr-3964	UUCCACAGCUUUCUUGAACUG	ptc-MIR396a	-45.40	0.99	DangsuA,DangsuB	CUUGGUAUUCUUCCACAGCUUUCUUGAACUGCACCUAUUUGAAUAUUGUUGUUGAUGUUGCCGUGCAUGUACAUAUGACAUUGUAUUUUUGUUGCGGUUCAAUAAAGCUGUGGGAAGAUACAA
pyr-3964	UUCCACAGCUUUCUUGAACUG	ptc-MIR396b	-49.30	1.01	DangsuA,DangsuB	CUUUGUAUUCUUCCACAGCUUUCUUGAACUGCACCUAUUAGAUUAAUGUUGAUGUUGUUGUGCGAUAUGCCAUGACCAUAUGACAUUGUAUUCAUUUUUGCUGCGGUUCAAUAAAGCUGUGGGAAGAUACAA
pyr-3964	UUCCACAGCUUUCUUGAACUG	sbi-MIR396b	-62.70	1.03	DangsuA,DangsuB	AGAUGGCCUUCUUUGUGAUCUUCCACAGCUUUCUUGAACUGCAUCUCUAAGAGGAGCAGCUUGAACUCUCUACCUGCAUGAGCAGGUGCAGUUCAAUAAAGCUGUGGGAAACUGCAGAGAGAGGCCAA
pyr-3964	UUCCACAGCUUUCUUGAACUG	mtr-MIR396b	-34.40	0.88	DangsuA,DangsuB	UAUUCUUCCACAGCUUUCUUGAACUGCAUCCAAAUUGAGUUCCUUUGCAUUGCCAUGGCCAUUGUUUUGCGGUUCAAUAAAGCUGUGGGAAGAUA
pyr-3964	UUCCACAGCUUUCUUGAACUG	mes-MIR396a	-67.00	0.94	DangsuA,DangsuB	UGGCCCUCUUCGUAUUCUUCCACAGCUUUCUUGAACUGCAUCUCUACAACGAAGCUUGUGGUUAUUGCAUGCCACGGCUCGCCAAUUAAGCGGCUUCUUGUUUUCUUGUUUUGUUGCGGUUCAAUAAAGCUGUGGGAAGAUACUGACAGGGUCA
pyr-3964	UUCCACAGCUUUCUUGAACUG	ghr-MIR396b	-46.50	0.89	DangsuA,DangsuB	CUUCGUAUUCUUCCACAGCUUUCUUGAACUGCAAUUUCAUGUAAUCAGAUCAUUCAUUCAUUCAUUGUCGUUGAUGGUGUUGCAUACAUACGAGUACGUUGUUGCGGUUCAAUAAAGCUGUGGGAAGAUACAAAC
pyr-3964	UUCCACAGCUUUCUUGAACUG	ghr-MIR396a	-47.20	0.89	DangsuA,DangsuB	CUUCGUAUUCUUCCACAGCUUUCUUGAACUGCAAUUUCAUGUAAUCAGAUCAUUCAUUCAUUCGUUGUCGUUGAUGGUGCUGCAUAUAUACGAGUACGUUGUUGCGGUUCAAUAAAGCUGUGGGAAGAUACAAACA
pyr-3964	UUCCACAGCUUUCUUGAACUG	bgy-MIR396a	-58.80	1.01	DangsuA,DangsuB	CCCUCUUUGUAUUCUUCCACAGCUUUCUUGAACUGCAUCUCUUAGAUUUGUUUUUGCAUGCCACGGUUUCUGGCUGGACGACUUGUGGAUUUGCGGUUCAAUAAAGCUGUGGGAAGAUACAGACAGGG
pyr-3964	UUCCACAGCUUUCUUGAACUG	zma-MIR396b	-69.20	0.97	DangsuA,DangsuB	AGAUGGCCUUCUUUGUGAUCUUCCACAGCUUUCUUGAACUGCAUCUCUCAGAGGAGCGGCAGCUUCAACUCCUCCACCCGCAUCAGCAGGUGCAUGCAGUUCAAUAAAGCUGUGGGAAACUGCAGAGAGAGGCCAG
pyr-3964	UUCCACAGCUUUCUUGAACUG	aqc-MIR396a	-44.00	0.94	DangsuA,DangsuB	UUCCACAGCUUUCUUGAACUGCAUGGUAAUCUAAUCUAAUACAGAUAAAAUUAAGCUUGUUCUUCAAGUACAUGGUGCCAUGGUGGUAUAUCGCCUUUGCGGUUCAAUAAAGCUGUGGGAAA
pyr-3964	UUCCACAGCUUUCUUGAACUG	zma-MIR396a	-68.30	0.86	DangsuA,DangsuB	ACAUGGCCCUCCUUGCCGUCUUCCACAGCUUUCUUGAACUGCAUGCCGCCGGCUGGUGGAUGCUGCGCGCUUGAAUUCCGGUCGAUCCCAAGAGGCGCAGUUCAAUAAAGCUGUGGGAAACUGCAGAGAGAGGCCAC
pyr-3964	UUCCACAGCUUUCUUGAACUG	aly-MIR396a	-57.40	0.91	DangsuA,DangsuB	UCUACGUGACCCUCUCUGUAUUCUUCCACAGCUUUCUUGAACUGCAAAACUUCUUCAGAUUUGUUUUUUUUAUAUAUAUGUCUUACGCAUAAAAUAGUGUUUUUGUUCACAUCUCUGCUCGAUUGAUUUGCGGUUCAAUAAAGCUGUGGGAAGAUACGGACAGAGUCAAAGA
pyr-3964	UUCCACAGCUUUCUUGAACUG	lus-MIR396c	-56.50	1.26	DangsuA,DangsuB	GCCUCUGCUUUUAUCCUUCCACAGCUUUCUUGAACUGCAUAUAUAUAUAUAUGCGAAUUAGGGUUUUUGUAUUAUAAUUGUGUGCGGUUCAAUAAAGCUGUGGGAAGAUACAAUCAGGGC
pyr-3964	UUCCACAGCUUUCUUGAACUG	lus-MIR396a	-54.30	1.02	DangsuA,DangsuB	UGGCUCUGCUUGUGUUCUUCCACAGCUUUCUUGAACUGCAUGGCAAAACCAGAGAUCUCUGAUGCAGCAGCAGUUCAAUAAAGCUGUGGGAAGAUACCCGCAGAAAGCCA
pyr-3964	UUCCACAGCUUUCUUGAACUG	ath-MIR396a	-47.90	0.94	DangsuA,DangsuB	CUCUGUAUUCUUCCACAGCUUUCUUGAACUGCAAAACUUCUUCAGAUUUUUUUUUUUUUCUUUUGAUAUCUCUUACGCAUAAAAUAGUGAUUUUCUUCAUAUCUCUGCUCGAUUGAUUUGCGGUUCAAUAAAGCUGUGGGAAGAUACAGAC
pyr-3964	UUCCACAGCUUUCUUGAACUG	sbi-MIR396a	-51.30	0.83	DangsuA,DangsuB	ACAUGGCCCUCCUUGCCGUCUUCCACAGCUUUCUUGAACUGCAUGCUGGUAGUGCUGUGUGCAUCCGUUCCAAUAUUCCAAGAGGCAGUUCAAUAAAGCUGUGGGAAAUUGCAGAGAGAGACCAG
pyr-3964	UUCCACAGCUUUCUUGAACUG	gma-MIR396i	-64.00	1.02	DangsuA,DangsuB	UGGCCCUCUUUGUAUUCUUCCACAGCUUUCUUGAACUGCAUCCAUAGAGUUCCUUUGCAUGCAUGCCAAGGCACUCUUGCUCCCACACCUUGUUUUGCGGUUCAAUAAAGCUGUGGGAAGAUACAGAUAGGGUCA
pyr-3964	UUCCACAGCUUUCUUGAACUG	gma-MIR396h	-56.10	0.97	DangsuA,DangsuB	GAAUGGUCUUUUUCGUGAUCUUCCACAGCUUUCUUGAACUGUGUUGUGUGAGGUUUCUCCAAGUGAAGGUUUAAGAUCCCUUAUGCAACAUAAAUUCUUUGAGCACAAUUCAAGAUAGCUGUGGAAAAUCACUGAGAUGAUCUCGUUC
pyr-3964	UUCCACAGCUUUCUUGAACUG	nta-MIR396a	-49.00	1.17	DangsuA,DangsuB	CUUUGUAUUUUUCCACAGCUUUCUUGAACUGCAUAUAUUUGAAAACUCACACCAUAUAUAACCAAUUAUUAUUAUUGGAGGUGAAAAUAAAAUAAAAAAUUGUUGCGGUUCAAUAAGGCUGUGGGAAGAUACAGAUAGU
pyr-3964	UUCCACAGCUUUCUUGAACUG	tcc-MIR396b	-63.20	0.90	DangsuA,DangsuB	ACAUGGCCCUCUUUGUAUUCUUCCACAGCUUUCUUGAACUGCUACUUCUUAGAUCGUUCCUUCUUGUUGGCGGUGAUGUUGCAUGUGGGCUGCAUACGGGUAUGUUGUUGCAGUUCAAUAAAGCUGUGGGAAGAUACGGACAGGGUCAAAG
pyr-3964	UUCCACAGCUUUCUUGAACUG	ssp-MIR396	-48.00	1.02	DangsuA,DangsuB	UUCCACAGCUUUCUUGAACUGCAUCUCUAAGAGGAGCAGCUCGAAGCCUCGAACUCUACCUGCAUGAGCAGGUGCAGUUCAAUAAAGCUGUGGGA
pyr-3964	UUCCACAGCUUUCUUGAACUG	gma-MIR396a	-59.30	0.97	DangsuA,DangsuB	UCAUGGCUCUCUUUGUAUUCUUCCACAGCUUUCUUGAACUGCAUCCAAAGAGUUCCUUUGCAUGCAUGCCAUGGCACUCUUACUCCCAAAUCUUGUUUUGCGGUUCAAUAAAGCUGUGGGAAGAUACAGAUAGGGUCAAC
pyr-3964	UUCCACAGCUUUCUUGAACUG	ssl-MIR396	-48.50	1.03	DangsuA,DangsuB	UUCCACAGCUUUCUUGAACUGCGCGGAACUGUACGUCGCCGCACCGGAGGCGAUGAUGCAAUCUUAUGCGGUUCAAUAAAGCUGUGGGA
pyr-3964	UUCCACAGCUUUCUUGAACUG	vvi-MIR396c	-46.90	0.98	DangsuA,DangsuB	UUCUGUGAUCUUCCACAGCUUUCUUGAACUGUUUUGGAAGCCUUCCACUUCCAUGCAAUGGAGGAGUUCAACCAACAGCUCAGGAAAGUUGUGGAACAUUACUGAGAG
pyr-3964	UUCCACAGCUUUCUUGAACUG	mes-MIR396b	-51.00	0.98	DangsuA,DangsuB	GAUCCUCUUUGUAUUCUUCCACAGCUUUCUUGAACUGCAUCUACUAUGAACUUGAUGAUUGUUGCAUGGCGGAUUCUUGUUUUUGUUUUGUUGCGGUUCAAUAAAGCUGUGGGAAGAUACUGAUAGGGUC
pyr-3964	UUCCACAGCUUUCUUGAACUG	gma-MIR396e	-44.70	0.99	DangsuA,DangsuB	GUGAUCUUCCACAGCUUUCUUGAACUGUGUUGUGAGGCUUCUCUCCAAUGAAGGUUUAUACCCUAUGCAAAAGAAAUUCUAUGAGCACAAUUCAAGAUAGCUGUGGAAAAUCAC
pyr-3964	UUCCACAGCUUUCUUGAACUG	sof-MIR396	-67.60	1.02	DangsuA,DangsuB	AGAUGGCCUUCUUUGUGAUCUUCCACAGCUUUCUUGAACUGCAUCUCUAAGAGGAGCAGCUCGAAGCCUCGAACUCUACCUGCAUGAGCAGGUGCAGUUCAAUAAAGCUGUGGGAAACUGCAGAGAGAGGCCAA
pyr-3964	UUCCACAGCUUUCUUGAACUG	csi-MIR396a	-54.10	0.89	DangsuA,DangsuB	CGAAGGUCCUCUUUGUGAUCUUCCACAGCUUUCUUGAACUGUCUUGAAUUUUCCGAUCGAUACCGGUGCAUGAUUAAUUCCCAACACAAUUCAAGAAAGCUGUGGAAAACUACUAAGAGGAUUUGGUCAUCAAUCUCUCUUUUGAUAGAGAUC
pyr-3964	UUCCACAGCUUUCUUGAACUG	csi-MIR396b	-61.90	1.19	DangsuA,DangsuB	UAUGAUCCUCUUUGUAUUUUUCCACAGCUUUCUUGAACUGCAUCAUCUUUGCAUGAGGCCACAGACUUGGCAUCGCAUUUGUUGCGGUUCAAUAAAGCUGUGGGAAGAUACAAACAGGUUCAAUAAAAUUUCAA
pyr-3964	UUCCACAGCUUUCUUGAACUG	dpr-MIR396	-48.60	1.03	DangsuA,DangsuB	ACUCUUCUUAUUUUUCCACAGCUUUCUUGAACUGCAGAUCAUCGUAUCGGAGUAAACUGGAGAUGACGCGGUUCAGUGAAGCUGUGGGAGAUAAUGAGAGGGUC
pyr-3964	UUCCACAGCUUUCUUGAACUG	hbr-MIR396b	-64.40	0.91	DangsuA,DangsuB	AUGACCCUCUUCGUAUUCUUCCACAGCUUUCUUGAACUGCAUCUCUACUACGAACUGGUGGUUGUUGCAUGCCACGGCUGGCCAAUUAAGCGGCUUCUUGCUUCUUGUUUUGUUGCGGUUCAAUAAAGCUGUGGGAAGAUACUAACAGGGUCAA
pyr-3964	UUCCACAGCUUUCUUGAACUG	mdm-MIR396b	-62.90	0.89	DangsuA,DangsuB	GAAGAUGAUGAUCCUCUUUGUAUUCUUCCACAGCUUUCUUGAACUGCAUCCAUCUAUGGCGAGAUCGACCGAUCUUUGGAGUGAGUCGACUCAGUAUCUCUAUUCCCCUUAACUUGGUUUGCGGUUCAAUAAAGCUGUGGGAAGAUACAGAUAGGCUCAAUAAAAUUC
pyr-3964	UUCCACAGCUUUCUUGAACUG	aau-MIR396	-61.70	0.95	DangsuA,DangsuB	AGCUAUGGCUCUCUCUGUAUUCUUCCACAGCUUUCUUGAACUGCAUCGAUCGAAGAAAGAGCAAGCUUUGUUCUCUCUUACAUGCAUGCCAAAUCGUCUUCUCGCGGUUCAAUAAAGCUGUGGGAAGAUACAGAUAGGGUCAACCA
pyr-3964	UUCCACAGCUUUCUUGAACUG	vvi-MIR396d	-46.70	0.99	DangsuA,DangsuB	CUUUGUAUUCUUCCACAGCUUUCUUGAACUGCAUUUUUCAGACUACUGGUGUGUUUUUGUAUGCACUCAAAGUCAUUGUAACAGUUGCGGUUCAAUAAAGCUGUGGGAAGAUACCAACAG
pyr-3965	UUCCACAGCUUUCUUGAACUA	pab-MIR396a	-49.40	0.97	DangsuA,DangsuB	AAUCCCGCCAUGCUCUUCCACAGCUUUCUUGAACUAAGAGUCGAUCGGAUCCGGUCAGUUCAGAGCUCAAGAAAGCUGUGGGAAAACAUGGGCGGAUUCG
pyr-3965	UUCCACAGCUUUCUUGAACUA	vvi-MIR396a	-50.10	1.04	DangsuA,DangsuB	UCCUGUCAUGCUUUUCCACAGCUUUCUUGAACUACUUUUCCAUCUACCUGUUUGAUGAUCUUCUUCAUAAGGAGUGUGAAAUAGAAGCUCAAGAAAGCUGUGGGAGGACAUGGCAA
pyr-2514	UGGAGAAGCAGGGCACGUGAA	hci-MIR164a	-33.90	0.46	DangsuA,DangsuB	GUUGAGGAAAUUAUUGAUCAUGUUUUUUUGAGUUGUCUGGAAUUCGACCGAAUUGGAGAAGCAGGGCACGUGAAUCGAAUUGGAUAGGUUUGGAAUGAUCUUGGGUGACUCCAAUGGUGGCAGAGAAGUAGCAACCCCACCCGAAUCCGUCCUCGUUAGC
pyr-4407	CUUGGAGUGAAGGGAGCUCUC	vvi-MIR159a	-93.60	1.01	DangsuA,DangsuB	GGGUUUAUGGGAGCUCCUUUACGCUCCAGUUCUGAAAGGAGAUGAUGGUAUCCACAGCUGCUGGUUCAUGAGUACCUAUGGCUGCACAAUAUAUAUAGCAAUGUUGUGUGCAAACUAUGGGUGUGCAUGACCUCGGAGAAGUGGUUGCCUUGAUCUUUCUGGCCUUGGAGUGAAGGGAGCUCUCAUAACCCUUC
pyr-4407	CUUGGAGUGAAGGGAGCUCUC	vvi-MIR159b	-74.70	0.96	DangsuA,DangsuB	GGGCUUGUGGGAGCUUCUUUACACUCCAGAACUGAAAGGAGAUACUACUGCUGGUUCAUGAAAACCUAUGGCUGCAUUCUCUAUACUGAAAUUUUGUAUACAAACUAUGGGUUUGCAUGAACUUGGAGAAGUGUUUGCUUUUAUCUUUUCUGGCCUUGGAGUGAAGGGAGCUCUCAUAACCGAUC
pyr-4400	CGGACCAGGCUUCAUUCCCC	ppt-MIR166g	-53.40	0.68	DangsuA,DangsuB	GUGCGGAGGUGUUUAGGUGAAACUCUGCUGCGAGGAAUGCCCCCUGGCCCGAAGGCAUGUACUUCUCCCUCUUCGAAUGGUGUGAGCAUCAAGCUUCGGACCAGGCUUCAUUCCCCUCAGCGCAGUUACAUUUCGAUAUUCACGUC
pyr-4400	CGGACCAGGCUUCAUUCCCC	ppt-MIR166f	-53.70	0.81	DangsuA,DangsuB	AUGACCAGCAUACCAGUGGUGCUGUGCUGGGAGGAAUGCUGCAUGGUCUGAUGCUUUUGCUGCGACACAAGCCUCGGACCAGGCUUCAUUCCCCUCAGCUCAGUCUCAUAUUGACGGUUCAAG
pyr-4400	CGGACCAGGCUUCAUUCCCC	ppt-MIR166e	-46.00	0.63	DangsuA,DangsuB	AAUGUGCUUUUGGAGUUGUGAACCUUGCUGUGAGGAAUGCCGCAUGGACCGAAGCUAUGUGCUCCAUCUUAACGUGGUGGUAUUGAUACUACGUUUCGGACCAGGCUUCAUUCCCCUCAGCGCAGUUUCAUCAUGGUGAUGGACGG
pyr-4400	CGGACCAGGCUUCAUUCCCC	ppt-MIR166d	-53.20	0.93	DangsuA,DangsuB	CAUAUUAGUCAUAUGCGGCUUGUCCUUGGGGAAUGAUGAUUGGACCGAAGUUUUUUAGCGUUGGUUUGCCCAAUUAAAGCUUCGGACCAGGCUUCAUUCCCCUCGUAGAAGUUGCAUGAUGAUGCAAU
pyr-4400	CGGACCAGGCUUCAUUCCCC	ppt-MIR166c	-59.80	0.91	DangsuA,DangsuB	ACUUGGUGCAACAUGGGACUUUAUCGUGGGGAAUGCCGUCUGGACCGGAGCUGUGUGUCCACUCUGCAUCAAAGCUUCGGACCAGGCUUCAUUCCCCUCGAGGGAGUUUCAUAGCAGUGCUAU
pyr-4400	CGGACCAGGCUUCAUUCCCC	ppt-MIR166b	-46.00	0.81	DangsuA,DangsuB	CUUUGUUGUGAGGAAUGCCGCAUGGACCGAAGCCAUGCGCUCCACAUCUAGACGGUGAUUUGGACGCUAUGCUUCGGACCAGGCUUCAUUCCCCUCAGCACAG
pyr-4400	CGGACCAGGCUUCAUUCCCC	ppt-MIR166a	-43.90	0.78	DangsuA,DangsuB	UCUGCUGUGAGGAAUGCCCCCUGGCCCGAAGCCAUGUGCCUUUUCAUGUCCACGUGGGGUAAACAUUAAAGCUUCGGACCAGGCUUCAUUCCCCUCAGCACA
pyr-4400	CGGACCAGGCUUCAUUCCCC	ppt-MIR166l	-50.00	0.78	DangsuA,DangsuB	AAUUUGUGAAGCUGAAUGAAACGUUUUCGUGGGGAAUGACGUGUGGCCCGUAGCCAUGUAUCUUGGCAUGCCAGAAUUAUGCUCCGGACCAGGCUUCAUUCCCCUCGGCAACGUUGCAUGAUGGUAAUUAUGU
pyr-4400	CGGACCAGGCUUCAUUCCCC	ppt-MIR166k	-48.80	0.72	DangsuA,DangsuB	GAAGAUGCUGGAUGUGCCUUUGCCGUGAGGAAUGACGUAUGGCCCGAAGCUAUCUCUUGGAUGGCCUUGAUGAAGCUCCGGACCAGGCUUCAUUCCCCUCGGCGGAGUUGCAAAUGUGGACAC
pyr-4400	CGGACCAGGCUUCAUUCCCC	ppt-MIR166j	-50.60	0.76	DangsuA,DangsuB	GAAGAUGUUAUAUAUAUGUGACAUUGCCGUGAGGAAUGACGUGUGGCCCGAAGCCAUAUCUUGGGUUGCCUUGAUGAAGCUCCGGACCAGGCUUCAUUCCCCUCGGCAGAGUUGCAACAAGUGGGAAAGGG
pyr-4400	CGGACCAGGCUUCAUUCCCC	ppt-MIR166i	-44.70	0.73	DangsuA,DangsuB	CUUGGAGAUUGGAUGGGACUUUGUCGUGGGGAUUGACGCAUGGCACGAAGCUAACAUCCUGAGAUCAGUUGCUUCGGACCAGGCUUCAUUCCCCUUGCCUAAGUUGCAUCAUGUAGUGCU
pyr-4400	CGGACCAGGCUUCAUUCCCC	ppt-MIR166h	-43.50	0.73	DangsuA,DangsuB	AGUUCGACAAGACUAUGAGACUUUGUCAUGAGGAAUGACGAGUGGCCCAGAUUCGUUUCUGGUCUAGAAAUUGAAUUUCGGACCAGGCUUCAUUCCCCUUGGCACGGUUCCAUGGAGGUACUGUCA
pyr-4400	CGGACCAGGCUUCAUUCCCC	ctr-MIR166	-116.20	0.81	DangsuA,DangsuB	GGUUUGUCUGAAGGAUCUAGGGUUAAUUGGGAAGCUUUUUCUUUUGAGGGGAAUGUUGUCUGGCUCGAGGCCACUAACUAGAUCUUUGAUUUAAUCUCAGUUGAUCAUAUAUUUGUUUCAUUUUUCUUCCAUAAAAUUUAAUUAUAUUGAGAUACCCAUCAUUGAUCUUAAGAUAAUUAAGUUAGUGACGUCGGACCAGGCUUCAUUCCCCCCAAUAAUUGCUUCUAUCUGCUAUGAUAUCAUCUUCAUUUCUUGGAGGUGCUGUGAUCAGUUCUCAAACUUUAGUUGAUUUUUUCACAAUUUUUCUUUUUGUUUAAUUUAUUGAUCUUGUGUUGUGUAUAUUUGUAUGGUCAACGGAGAGAUCUUGGUCAUUGGCCAUGAGCAGAUUGGUGUAAUGAU…
pyr-4400	CGGACCAGGCUUCAUUCCCC	sbi-MIR166b	-49.50	1.03	DangsuA,DangsuB	GGGGAAUGAUGUCCGGUCCGAAGACGCUGUGCGGCGAAAGCGGCGGCGGCUUCGGACCAGGCUUCAUUCCCC
pyr-4400	CGGACCAGGCUUCAUUCCCC	sly-MIR166b	-73.10	0.89	DangsuA,DangsuB	UCCCAUAGAUCAUAUGGAGGAAGUUCUCUCAGUUGAGGGGAAUGUUGUCUGGCUCGAGGUCACCAAUUAGAUCCAUAAUCCCUAUAUAUACCAUGCUUUUCAAAAAAAAGAUUUAUAAUAUGAAAAGGGGUUAUGAAUCAUGUGUUAGUGUUGUCGGACCAGGCUUCAUUCCCCCCAAUUGUUACUCCUCUAGCUAGGGGA
pyr-4400	CGGACCAGGCUUCAUUCCCC	smo-MIR166a	-62.80	0.82	DangsuA,DangsuB	AGCAAGUCCUGGAUGUGGGGAUUGUUGCCUGGCUCGAGGGAGGCAUUCCUUUGAUCUUUUCUCUCCUGGGAAGUACUCCAGAAGAACUGUGCCAGAAAUGUGCGCUCUCGGACCAGGCUUCAUUCCCCUCAUCUGAGAUUGCACC
pyr-4400	CGGACCAGGCUUCAUUCCCC	smo-MIR166b	-55.40	0.80	DangsuA,DangsuB	UUCCUCAGUGAGAACCAGGAUGUGGGGAGUGUAGCCUAGCUCGAGAGAUUGAUUUGAUACUAAGGCUACGCACACAAGGUUGUGAUCACAGCUUUGUCUCGGACCAGGCUUCAUUCCCCUCAGUGUGGUGCUCACU
pyr-4400	CGGACCAGGCUUCAUUCCCC	smo-MIR166c	-60.90	0.87	DangsuA,DangsuB	UAUGUUGCGGGGAGUGCUGCCUGGCUCGAGACAGCAUCGCCGAGAUCUGAUCAAAUCGCAAAGUUGAGAAACAAGCAUCACAGUUUGAUCUGGAGAUCGUGUUGUGUCGGACCAGGCUUCAUUCCCCUCAGCUACAAA
pyr-4400	CGGACCAGGCUUCAUUCCCC	hpa-MIR166a	-54.60	0.98	DangsuA,DangsuB	UUUGUGGGGAAUGUUGUCUGGCUCGAGACCACAAGAAAGCUUCAAUCUUUAUGAUCUUUAUGUUACAUAAUCACAUAAUUGAUCAAUCUUUGUUGAUCAAUGAUUAAAGAUUCUAAUCUUGUGUUGUCGGACCAGGCUUCAUUCCCCUCAUG
pyr-4400	CGGACCAGGCUUCAUUCCCC	pta-MIR166b	-63.10	0.84	DangsuA,DangsuB	GGCAGAGUUGGGGUGAGGGGACUGCAGCCUGGCACGAGACCUGAAAACUUUUCUGACAAGCAGCCGGGCGGGCAGAGUCACGCAUGGUGUCGGACCAGGCUUCAUUCCCCUCACAACACUCUUCC
pyr-4400	CGGACCAGGCUUCAUUCCCC	vvi-MIR166h	-41.20	0.82	DangsuA,DangsuB	AACAGUUGAGGGGAACGCUGUCUGGUUCGAGACCACUCGCUUCAAGUACAGACAUAAUCUGAAUGAUCUCGGACCAGGCUUCAUUCCCCCCAACUCAACA
pyr-4400	CGGACCAGGCUUCAUUCCCC	ath-MIR166g	-47.20	0.89	DangsuA,DangsuB	GCGAUUUAGGGUUUAGAGGAAUGUUGUUUGGCUCGAGGUCAUGGAGAGUAAUUCGUUAACCCAACUCAAAACUCUAAAUGAUUCUCGGACCAGGCUUCAUUCCCCUCAACCUAUUUUAUCGC
pyr-4400	CGGACCAGGCUUCAUUCCCC	vvi-MIR166f	-48.50	1.05	DangsuA,DangsuB	UGUAGUUGUGGGGAAUGUUGGCUGGCUCGAGGCUUUCUUGAGUGAUUUUAUGUAUACCUCAAAAAGCUUCGGACCAGGCUUCAUUCCCCUCAACACACUU
pyr-4400	CGGACCAGGCUUCAUUCCCC	vvi-MIR166g	-58.00	1.23	DangsuA,DangsuB	AACAGUUGAGGGGAAUGUUGUCUGGUUCGAGAUCCUUCGUAUGAAGCUCAAGCAGCGUUUGAAUGAUUUCGGACCAGGCUUCAUUCCCCUCAACCCAAAA
pyr-4400	CGGACCAGGCUUCAUUCCCC	vvi-MIR166d	-48.88	0.65	DangsuA,DangsuB	CUGCUUUGAGGGGAUUGUUGUCUGGCUCGAGGCCACCAACCAUCUUUGAUUGAUUCAAAUACUUUGAUCAGCUUCAACCCAUCUUCUCCUUCAAUUCAAUUCCACCCUCUGAUUAUGUGUUAGUGCCCUCGGACCAGGCUUCAUUCCCCUCAAUCACUGC
pyr-4400	CGGACCAGGCUUCAUUCCCC	vvi-MIR166e	-69.90	0.92	DangsuA,DangsuB	GUGUUUUGAGGGGAAUGUUGUCUGGCUCGAGGACACCAACUAGAUCUAUGAUCUGCGUGUAAUUGUGAAUGGGUGAUCGUCUCUCAGUUUUGAAGGAGAGAUUUUGAGUGAUCUUUGAUCAUGGGUUGGUGUCGUCGGACCAGGCUUCAUUCCCCCCAAUUUAUUG
pyr-4400	CGGACCAGGCUUCAUUCCCC	vvi-MIR166c	-50.50	0.78	DangsuA,DangsuB	CUAUUUUGAGGGGAAUGUUGUCUGGCUCGAGGACACUUACCUUAACUUUGAUCCGUUUCUCUAGAUCCAUAUCACCUAUAUAUAUGUAUUAUUGUAUUUUUAUUUGUACUGAGCAUGUGUUGGUGUCGUCGGACCAGGCUUCAUUCCCCCCAAUUAUCGC
pyr-4400	CGGACCAGGCUUCAUUCCCC	ath-MIR166e	-49.10	0.93	DangsuA,DangsuB	UUGAGGGGAAUGUUGUCUGGCACGAGGCCCUUAACUUAGAUCUAUAUUUGAUUAUAUAUAUAUGUCUCUUCUUUAUUCAUUAGUCUAUACAUGAAUGAUCAUUUUACGGUUAAUGACGUCGGACCAGGCUUCAUUCCCCUCAA
pyr-4400	CGGACCAGGCUUCAUUCCCC	stu-MIR166d	-33.80	0.99	DangsuA,DangsuB	AGAAUGUCGUCUGGUUCGAGAUCUUUCAUAAGAAGGUAACAUGCAAUGAGAUGAUUUCGGACCAGGCUUCAUUCCCC
pyr-4400	CGGACCAGGCUUCAUUCCCC	ath-MIR166c	-44.00	0.75	DangsuA,DangsuB	GCGAUUUAGUGUUGAGAGGAUUGUUGUCUGGCUCGAGGUCAUGAAGAAGAGAAUCACUCGAAUUAAUUUGGAAGAACAAAUUAAGAAAACCCUAGAUGAUUCUCGGACCAGGCUUCAUUCCCCCUAACCUACUUAUCGC
pyr-4400	CGGACCAGGCUUCAUUCCCC	ath-MIR166f	-41.00	0.89	DangsuA,DangsuB	AAGUUCAGGUGAAUGAUGCCUGGCUCGAGACCAUUCAAUCUCAUGAUCUCAUGAUUAUAACGAUGAUGAUGAUGAUGUCGGACCAGGCUUCAUUCCCCUCAACUU
pyr-4400	CGGACCAGGCUUCAUUCCCC	csi-MIR166a	-64.60	0.91	DangsuA,DangsuB	GAAGCUUUUUCUUUUGAGGGGAAUGUUGUCUGGCUCGAGGCCACUAACUAGAUCUUUGAUUUAAUCUCAGUUGAUCAUAUAUUUGUUUCAUUUUUCUUCCAUAAAAUUUAAUUAUAUUGAGAUACCCAUCAUUGAUCUUAAGAUAAUUAAGUUAGUGACGUCGGACCAGGCUUCAUUCCCCCCAAUAAUUGCUUCUAUCUGC
pyr-4400	CGGACCAGGCUUCAUUCCCC	ath-MIR166d	-37.50	0.75	DangsuA,DangsuB	GGUUGAGAGGAAUAUUGUCUGGCUCGAGGUCAUGAAGAAGAUCGGUAGAUUGAUUCAUUUUAAAGAGUGAAAUCCCUAAAUGAUUCUCGGACCAGGCUUCAUUCCCCCCAACC
pyr-4400	CGGACCAGGCUUCAUUCCCC	csi-MIR166c	-57.00	0.98	DangsuA,DangsuB	UUCCUCCUCGAUCAUACAUGAACGGUUGAGGGGAAUGUUGUCUGGUUCGAGAUCACUCGUGGACGAAUUAAUUAAUAACUUAUUGUCUUUUGAAUGAUUUCGGACCAGGCUUCAUUCCCCCCAACUCAGUUUAAUUGC
pyr-4400	CGGACCAGGCUUCAUUCCCC	ath-MIR166b	-51.10	0.98	DangsuA,DangsuB	UUGAGGGGACUGUUGUCUGGCUCGAGGACUCUUAUUCUAAUACAAUCUCAUUUGAAUACAUUCAGAUCUGAUGAUUGAUUAGGGUUUUAGUGUCGUCGGACCAGGCUUCAUUCCCCCCAA
pyr-4400	CGGACCAGGCUUCAUUCCCC	csi-MIR166e	-61.50	0.82	DangsuA,DangsuB	GGGGAGCUUUUUGUUUUGAGGGGAAUGUUGUCUGGCUCGAGGACACUACUUGUUGAUCCAUUAAUUUUACGUAUUCUCUCAUAGAUCUAGCAUCUGAAUGGUGGAUAACAAUAUACGGAUUCAGCUUAUUUGGCGUCGUCGGACCAGGCUUCAUUCCCCCCAAUAUAUUGCUUCUAU
pyr-4400	CGGACCAGGCUUCAUUCCCC	ath-MIR166a	-67.60	0.84	DangsuA,DangsuB	AGGGGCUUUCUCUUUUGAGGGGACUGUUGUCUGGCUCGAGGACUCUGGCUCGCUCUAUUCAUGUUGGAUCUCUUUCGAUCUAACAAUCGAAUUGAACCUUCAGAUUUCAGAUUUGAUUAGGGUUUUAGCGUCUUCGGACCAGGCUUCAUUCCCCCCAAUUGUUGCUCCCU
pyr-4400	CGGACCAGGCUUCAUUCCCC	mdm-MIR166g	-73.10	1.06	DangsuA,DangsuB	UUGAGGGGAAUGUUGUCUGGCUCGAGGACACUUUCCUUGAUCUAUAAUCUCUAGAUCAACCGUUAUAUACCUAUACAUAUAUCUAUAUAUGUGUUUGUAUAUGUUGUGUGUAUCAUCUGCAUACAUAGAUGAUCAGGUUAAGUAGUGUCGUCGGACCAGGCUUCAUUCCCCCCAA
pyr-4400	CGGACCAGGCUUCAUUCCCC	mdm-MIR166f	-47.30	1.03	DangsuA,DangsuB	GUGUUGAGGGGAAUGCUGUCUGGUUCGAGACCAUUCCUUUGAAGCAAAGAACAUGAACAUCGAAUGAUUUCGGACCAGGCUUCAUUCCCCCUAACAC
pyr-4400	CGGACCAGGCUUCAUUCCCC	atr-MIR166b	-68.70	0.94	DangsuA,DangsuB	AUGGGGGGAAAACCUUUGUGUGGAAUGAGGUUUGAUCCAAGAUCUCUUUCCAUAUGUGGAUCAUGUGAACUUGCACCUUUGCAUGUUGGCAAACCCUCUUCUAUGAAUAGAUCUCGGACCAGGCUUCAUUCCCCACACUGGUUUUCCACAAUAAAUUGAAACCCCAU
pyr-4400	CGGACCAGGCUUCAUUCCCC	mdm-MIR166d	-64.60	0.86	DangsuA,DangsuB	GGUUAUUGAGGGGAAUGUUGUUUGGCUCGAGGCCCCUAGCUAGAUCUAUGAUCUCCAUCUCAAUUGGCGACAAUUUUAACCACCAACCUUAAAAAAUUUACAGUACCAGUUGAGAAAGAUCAUCGAUUCUACGUUUAACGACCUCGGACCAGGCUUCAUUCCCCCCAAUUACU
pyr-4400	CGGACCAGGCUUCAUUCCCC	mdm-MIR166c	-51.90	1.27	DangsuA,DangsuB	AGUUGUGGGGAAUGUUGUCUGGUUCGAGAUCUUUCAAUAAAACUUGAAGAUCGUUAUCAUCUGAAUGAUCUCGGACCAGGCUUCAUUCCCCUCAACU
pyr-4400	CGGACCAGGCUUCAUUCCCC	mdm-MIR166a	-64.70	0.91	DangsuA,DangsuB	UUGAGGGGAAUGUUGUCUGGCUCGAGGACUCUUUUCAUAUUGAUCUAUAAUCCCCUAGAUCAACAACCUUCAUAUAUAUCUAUAUGUGUAUGUAUAUGUUGCGUGUAUCAACUGCAUACACAGAGAUGAUCAGGUGAAUUAGUGUCGUCGGACCAGGCUUCAUUCCCCCCAA
pyr-4400	CGGACCAGGCUUCAUUCCCC	cpa-MIR166b	-41.50	1.06	DangsuA,DangsuB	GGAAUGUCGUCUGGUUCGAGAUCAUUCAUGUGAAGGUUCGAGAUCGUUUCUUGGAUGAUUUCGGACCAGGCUUCAUUCCCC
pyr-4400	CGGACCAGGCUUCAUUCCCC	mdm-MIR166i	-52.20	1.24	DangsuA,DangsuB	AGUUGAGGGAAAUGUUGUCUGGUUCGAGAUCUUUCAGUGAAGCUUGGAUAUUGUCAUCAUCUGAAUGAUUUCGGACCAGGCUUCAUUCCCCUCAACU
pyr-4400	CGGACCAGGCUUCAUUCCCC	osa-MIR166d	-54.10	0.89	DangsuA,DangsuB	GAAGCUUUUUCACUUUGAGGGGAAUGUUGUCUGGCUCGAGGUGCAUGGAGAAACCUCUGAUCGAUCAGGUUUGAUCUGUAGAGACUGAUCUCGGACCAGGCUUCAUUCCCCUCAAGUAAAGCUCC
pyr-4400	CGGACCAGGCUUCAUUCCCC	ptc-MIR166i	-40.30	0.86	DangsuA,DangsuB	UGUCUUUUGAGGGGAAUGUUGUUUGGUUCAAGGCCUGGCCACCCCAUGUCUUGGAAUUUAAAAUAUCAUGUCCUCGGACCAGGCUUCAUUCCCCUCAAUUACU
pyr-4400	CGGACCAGGCUUCAUUCCCC	osa-MIR166f	-60.10	1.00	DangsuA,DangsuB	CGAUCAUCUUGUUGAGAGGAAUGUCGUCUGGCCUGAGAUCGUACCACAGUGGUGGGUACACGUGGACGGUCUCGGACCAGGCUUCAUUCCCCUCAACAACUCGUCGG
pyr-4400	CGGACCAGGCUUCAUUCCCC	ptc-MIR166k	-46.50	0.82	DangsuA,DangsuB	UCUUUUUUGAGGGGAAUGUUGUCUGGCUCGAGGACUUUUUGUUCAUCAAUCUAAUCGAACUUUCUACCUGUAGAUCUAGUAUCUUAUUUAAGAUUGAUCACGUAUUAGGGUUGUCGGACCAGGCUUCAUUCCCCCCAAUCAUU
pyr-4400	CGGACCAGGCUUCAUUCCCC	ptc-MIR166l	-38.40	0.89	DangsuA,DangsuB	UAACUUUUGUGGUGAAUGUUGUCUGGUUCAAGGCAUGGCCACCACAUCUCUUGGUGAAUAUAUGUCCUCGGACCAGGCUUCAUUCCCCUCAAUUAAU
pyr-4400	CGGACCAGGCUUCAUUCCCC	osa-MIR166a	-66.90	0.98	DangsuA,DangsuB	UGAAGCUAUUUGCUUCUGAGUGGAAUGUUGUCUGGUUCAAGGUCUCAUGCACCUUGCGGUUUUGAGGAUGAUUUGUGCAAGGUUUUUCAUUCCUCUCAUCCGUGGGAUCUCGGACCAGGCUUCAUUCCCCUCAGAGAUAGCUUCA
pyr-4400	CGGACCAGGCUUCAUUCCCC	osa-MIR166b	-87.10	0.98	DangsuA,DangsuB	GGGAGCCUUUUCAUUUUGAGGGGAAUGUUGUCUGGCUCGGGGCUACUUUUAAUUUCUCUCUCUUUUGAUAUCUUCUUUUCUCGAUCUCCUAGCUUGAUCUUUUGAUCUCUCAAAUCGAUCUUAAGAAAAAGAUCAGUCAAAGAGAUGAGAGUAGAUGUCUGUAGAUCUCGGACCAGGCUUCAUUCCCCCCAAACAGAAGGGCUCCC
pyr-4400	CGGACCAGGCUUCAUUCCCC	osa-MIR166c	-72.70	1.01	DangsuA,DangsuB	GGCAGUUGAGGGGAAUGUUGUCUGGUCCGAGACCUAACACCGGGCGGAAUGGCGGAUUCAGCUGCAGCUAAGCAAGCUAGGUGGGGGGUUUCGGACCAGGCUUCAUUCCCCCCAACUCAACUGUU
pyr-4400	CGGACCAGGCUUCAUUCCCC	ptc-MIR166a	-55.00	0.98	DangsuA,DangsuB	UUUCUUUUGAGGGGAAUGUUGUCUGGCUCGAGGUCACUAAUGGGAUCUAUGAUUUUAUCUCAAUUGAUUGAUUUUCUUUUAAAUUCUAGUAAAUUGAAUUGAGAGAUAUCAUGAUCAACUUAUAUUUAAUGAUGUCGGACCAGGCUUCAUUCCCCCCAAUUGUU
pyr-4400	CGGACCAGGCUUCAUUCCCC	ptc-MIR166b	-45.40	1.03	DangsuA,DangsuB	UAACUGUUGAGGGGAUUGCUGUCUGGUUCGAUGUCAUUCAUGUGAAGCUUUAACAUUAAUGUAGUAUUGAGUGAUUUCGGACCAGGCUUCAUUCCCCCCAACUAUA
pyr-4400	CGGACCAGGCUUCAUUCCCC	ptc-MIR166c	-56.10	1.00	DangsuA,DangsuB	CUUUUUUUGAGGGGAAUGUUGUCUGGCUCGAGGACUCUUUCUUGAUCAGUCUGAUCAAGUGUUCUAUCUUUAGAUCUAAUAUCUUAGAUCAUGUGUUAGGGUCGUCGGACCAGGCUUCAUUCCCCCCAAUUAUU
pyr-4400	CGGACCAGGCUUCAUUCCCC	ptc-MIR166d	-52.30	1.05	DangsuA,DangsuB	CGUGAGUUGAGGGGAAUGUUGGCUGGCUCGAAGCUUAAGCAAAGAGUUUUCUCUCAAGAAACAACUGUUAAGGCUUCGGACCAGGCUUCAUUCCCCUCAACCAAU
pyr-4400	CGGACCAGGCUUCAUUCCCC	ptc-MIR166e	-46.90	1.04	DangsuA,DangsuB	UAACUGUUGAGGGGAUUGUCGUCUGGUUCGAUGUCAUUCAUGAGAAGCUCAAACAUAAACGUAAUAUUGAAUGAUUUCGGACCAGGCUUCAUUCCCCCCAACAAUG
pyr-4400	CGGACCAGGCUUCAUUCCCC	osa-MIR166j	-52.50	0.89	DangsuA,DangsuB	UGAUCCAUGGCUGUUGAGAGGAAUGACGUCCGGUCUGAAGAUCGCCGUCCCCAGGCGGUGGCUUCGGACCAGGCUUCAUUCCCCAUGACUCAUGGAACCC
pyr-4400	CGGACCAGGCUUCAUUCCCC	ptc-MIR166g	-54.20	1.02	DangsuA,DangsuB	ACACAGUUGAGGGGAAUGCUGUCUGGUUCGAGACCAUUCACCUGAAGCGCACGCAUUCAUCUUUUGAGUGAUCUCGGACCAGGCUUCAUUCCCCCCAACUCAA
pyr-4400	CGGACCAGGCUUCAUUCCCC	pta-MIR166a	-55.60	1.07	DangsuA,DangsuB	UUGAUUGAGGGGAAUGUUGUCUGGCUCGACUUCAUCCGGAUUUGGGCUCCAAUGUUCGGAUGCCGUCGGACCAGGCUUCAUUCCCCCCAAUCGG
pyr-4400	CGGACCAGGCUUCAUUCCCC	atr-MIR166d	-46.30	0.78	DangsuA,DangsuB	UGUUGUGGGGAAUGUUGGCUGGCUCGAGGCCAUCCGAUUUAGGAAAGCCGCUUCGGUUGGCAUAGUCCCGGGUGACAUCGGACCAGGCUUCAUUCCCCUCAAACA
pyr-4400	CGGACCAGGCUUCAUUCCCC	cpa-MIR166e	-34.40	0.78	DangsuA,DangsuB	GGAAUGUUGGCUGGCUCGAGGCUUUGACAAAACAGGGUUCUUCUGCAACAAGAACUUCAAAAAGGCUUCGGACCAGGCUUCAUUCCCC
pyr-4400	CGGACCAGGCUUCAUUCCCC	atr-MIR166a	-53.00	1.10	DangsuA,DangsuB	CUUGGGGUUGAGGGGAAUGUUGUCUGGUUCGAAACCAUUUUGCGAUUAUAUCCAUCUAUCGAAAGGAUUUCGGACCAGGCUUCAUUCCCCCCAACCUUCAAG
pyr-4400	CGGACCAGGCUUCAUUCCCC	ssp-MIR166	-64.60	1.01	DangsuA,DangsuB	AGCUAUUUGCUUCUGAGUGGAAUGUUGUCUGGUUCAAGGUCUCGCUUGCGAUUUAAGGAUGAUUCGUGCAUGGCAUGUGUAGUUUUUAUUCCUUGAAUCUGUGGGAUCUCGGACCAGGCUUCAUUCCCCUCAGCAAUAGC
pyr-4400	CGGACCAGGCUUCAUUCCCC	mdm-MIR166e	-52.20	1.24	DangsuA,DangsuB	AGUUGAGGGAAAUGUUGUCUGGUUCGAGAUCUUUCAGUGAAGCUUGGAUAUUGUCAUCAUCUGAAUGAUUUCGGACCAGGCUUCAUUCCCCUCAACU
pyr-4400	CGGACCAGGCUUCAUUCCCC	sly-MIR166a	-51.50	1.17	DangsuA,DangsuB	GUUGAGGAGAAUGUCGUCUGGUUCGAGAUCUUUCAUAAGAAAGGUAAAUGAAUGACAAGUUUUCAUAUAUGUAUCGUGAAUGAUUUCGGACCAGGCUUCAUUCCCCUCAAC
pyr-4400	CGGACCAGGCUUCAUUCCCC	atr-MIR166c	-62.20	0.93	DangsuA,DangsuB	UCAGAUGAUGAUGAUAUAUGCAUAUGAGUUGUGGGGAAUGUUGUCUGGCUCGAGGUACAUCUGGGGUUAUCUUGAGUCACAUUCCAGAUGAUCUCGGACCAGGCUUCAUUCCCCUCAACCAAGCCGAGCUCAUCCUUCUUAUGA
pyr-4400	CGGACCAGGCUUCAUUCCCC	hpe-MIR166a	-59.20	0.92	DangsuA,DangsuB	GGUAGAUCUUUCUUUUGUGGGGAAUGUUGUCUGGCUCGAGACCACAAGAAAGCUUCAAUCUUUAUAAUCUUUAUGUUACAUAAUCACAUAAUUGAUCAAUCUUUGUUGAUCAAUGAUUAAAGAUUAGAAUCUUGUGUUGUCGGACCAGGCUUCAUUCCCCUCAUGUGUUCUUCCUU
pyr-4400	CGGACCAGGCUUCAUUCCCC	cpa-MIR166a	-43.30	0.79	DangsuA,DangsuB	GGAAUGUUGUCUGGCUCGAGGACAUUUAAUUCUAUGCAUCCAUCCAUCCAUCCAUUUACAUCUCCAGAUCUGGACUACUUGGAUUAAUUUUGAGUUAGUGUCGUCGGACCAGGCUUCAUUCCCC
pyr-4400	CGGACCAGGCUUCAUUCCCC	stu-MIR166a	-39.90	0.97	DangsuA,DangsuB	GGAAUGUUGUCUGGCUCGAGGAAUCAAAUUCUUUAUUACUCAUAGAUCUGUAUAUUGUUUAUAGAUCUAUAAUGUUUUUGACGUCGUCGGACCAGGCUUCAUUCCCC
pyr-4400	CGGACCAGGCUUCAUUCCCC	stu-MIR166c	-26.70	0.65	DangsuA,DangsuB	GGAAUGUUGUUUGGCUCGAGGCCACCAACUUCAUCUAAUGUAAGCAACUCUUGUUAGUGUCGUCGGACCAGGCUUCAUUCCCC
pyr-4400	CGGACCAGGCUUCAUUCCCC	bna-MIR166b	-42.30	0.90	DangsuA,DangsuB	AAGUUCAGGUGGAUGAUGCUUGGCUCGAGACCAUUCAAUAUGAUCAUUGUGAUGAUGAUGAUGAUGAUGAUAAUGAUAAUGAUAAUGAUGUCGGACCAGGCUUCAUUCCCCUCAACUU
pyr-4400	CGGACCAGGCUUCAUUCCCC	bna-MIR166c	-42.00	0.81	DangsuA,DangsuB	GAGCCAAAAGUUCAGGUGGAUGAUGCUUGGCUCGAGACCAUUAAAUAUGAUCAUUGUGAUGUUGAUGAUGAUGAUGAUAAUGAUAAUGAUAGUCGGACCAGGCUUCAUUCCCCUCAACUUACACGUUU
pyr-4400	CGGACCAGGCUUCAUUCCCC	bna-MIR166a	-52.00	0.91	DangsuA,DangsuB	UUGAGGGAAUGUUGUUUGGCUCGAAGACUCUAGCUUAUCAUGUUAGAUCUUCUUCGAUUUAAUCGAAUCAAACCUCCAUGUUUGAGAUCUGAUUUAGGAUUUUAGGGUCGUCGGACCAGGCUUCAUUCCCCCCAA
pyr-4400	CGGACCAGGCUUCAUUCCCC	cpa-MIR166c	-39.90	0.87	DangsuA,DangsuB	GGAAUGCUGUCUGGUUCGAGACCAUUCAUUAAUUCAAACUAAGCUUAAUUUGAAGAUUGAGUUCAUUGUCCAUCUCCUCUUAAUUAGUGAUCUCGGACCAGGCUUCAUUCCCC
pyr-4400	CGGACCAGGCUUCAUUCCCC	bna-MIR166d	-44.30	0.69	DangsuA,DangsuB	GUGGUGCGGUUUAGGGCUGAGAGGACUGUUGUCUGGCUCGAGGUCAUGAAGAAUGAAACCUAAACCUAAAUGAUUCUCGGACCAGGCUUCAUUCCCCCCAGCCGUUUUAUCGCCAUAUAUAUGCCCAC
pyr-4400	CGGACCAGGCUUCAUUCCCC	bna-MIR166e	-55.10	1.02	DangsuA,DangsuB	UUCUUUUGAGGGGAAUGUUGUCUGGCACGAGGCCCUUAACACAGAUCUACGAUCGGUUAUAUAUAUAAUAUAUGAACGAUCAAUUUAGUGGUUGAUGACGUCGGACCAGGCUUCAUUCCCCUCAAUUACA
pyr-4400	CGGACCAGGCUUCAUUCCCC	mtr-MIR166e	-51.30	1.09	DangsuA,DangsuB	UUUGAGGGGAAUGUUGGCUGGCUCGAGGCUUUUCAGUUUCACAAAGGAAGUUCAGUCUUAAUUGUAUGAACUAUAAGGCUUCGGACCAGGCUUCAUUCCCCUCAAA
pyr-4400	CGGACCAGGCUUCAUUCCCC	mtr-MIR166g	-44.60	0.91	DangsuA,DangsuB	UUUGAGGGGAAUGUUGUCUGGCUCGAGGACGCUUUCUUCUCGAUCUAAUGCAAAUUUGUGGUCAUGGAUUGUAAAGUAUUCUCGGACCAGGCUUCAUUCCCCCCAAU
pyr-4400	CGGACCAGGCUUCAUUCCCC	mtr-MIR166a	-48.10	0.83	DangsuA,DangsuB	CAGACAUACGAAGGAGUUCAGGGGAAUGGUGUCUGAUUCGAGACCAUUCGUCACAAGUAAACAGUAGCCUUGAGAAUGAUCUCGGACCAGGCUUCAUUCCCCCUAGCUCAUAGUAUCAUGC
pyr-4400	CGGACCAGGCUUCAUUCCCC	ssl-MIR166b	-49.20	1.03	DangsuA,DangsuB	GGGGAAUGCUGUUUGGUUCGAGAUCAUCCGAGCUUCGGUGUCAUCUACGGACAUUCCAUCGUAUGGUCUCGGACCAGGCUUCAUUCCCC
pyr-4400	CGGACCAGGCUUCAUUCCCC	gma-MIR166s	-51.80	0.88	DangsuA,DangsuB	AAUGAGGGUGUGGGGAAUGUCGCCUUGGCUCGAGAGAUCUAUAUGAUAUGAUGUGUCCAUGCAUUCACUAAUCAUCAGUUUGUGAGUGUUUUCUCGGACCAGGCUUCAUUCCCCUCACUCCCUC
pyr-4400	CGGACCAGGCUUCAUUCCCC	gma-MIR166p	-47.70	0.94	DangsuA,DangsuB	AAAAGUUGAGGGGAAUGUCAUCUGGUUCGAGAUCAUUCAUUUAUUCAAUUAGUCUCAAACACGAAAAUGCGGACCCAGUUCUUUUGUGUGAUUUCGGACCAGGCUUCAUUCCCCUGAGCUAU
pyr-4400	CGGACCAGGCUUCAUUCCCC	gma-MIR166q	-51.90	0.93	DangsuA,DangsuB	UGUUAGGUUGAGAGGAAUGUUGUCUGGCUCGAGGUCAUGAAGAUAUACAUAUGAAAGUGUUAACUUUUCAGUUAAUUUCUAGGAUAAAUUAAUGGAAAUUAAUUUAUACCCUAAAUGAUUCUCGGACCAGGCUUCAUUCCCCCCAGCCAACA
pyr-4400	CGGACCAGGCUUCAUUCCCC	gma-MIR166t	-59.70	1.01	DangsuA,DangsuB	AGGGUGUGGGGAAUGUCGCCUUGGCUCGAGAGAGAUAUAUGCAUGAUGUGUCCAUGCAUUCACCAAUGAAUCAAAUGAUAUUAUAUCAGUUUGAAUUGUGAAUGUUUUCUCGGACCAGGCUUCAUUCCCCUCACUC
pyr-4400	CGGACCAGGCUUCAUUCCCC	gma-MIR166u	-44.60	0.70	DangsuA,DangsuB	GAGGUUGAGAGGAAUGUUGUCUGGCUCGAGGUCAUGGAGGAGGAGGAGAGUACUGAGAUGAGUGAAAGUUUCCAAUGGAAAUUUACCCUCUUAACACAAAAAAAAAUUGAUUCUCGGACCAGGCUUCAUUCCCCACACCCA
pyr-4400	CGGACCAGGCUUCAUUCCCC	tcc-MIR166a	-53.00	1.18	DangsuA,DangsuB	UAUAACAUCAACUGUUGAGGGGAAUGUUGUCUGGUUCGAAGUCAUUCAUAUGAAUCUUAAAUGUCUUCUGAAUGAUUUCGGACCAGGCUUCAUUCCCCCCAACUUGUUUUAAUAGCUA
pyr-4400	CGGACCAGGCUUCAUUCCCC	bdi-MIR166a	-69.70	1.03	DangsuA,DangsuB	UUUUCAUGGUUGUCGAGGGGAAUGACGCCGGGUCUGAAAGAAAGAAGGGGGCACGCCGGGAAUGACAGCGGUUCCCUAGCUCUUUCGGACCAGGCUUCAUUCCCCAUGACUCGACCAUGG
pyr-4400	CGGACCAGGCUUCAUUCCCC	bdi-MIR166b	-110.80	0.92	DangsuA,DangsuB	GCUAGAGAGGGAGCCUUUUUCGUUUUGAGGGGAAUGUUGUCUGGCUCGGGGUUCUCUUUAUUUCUAUGCCUCUCUCUAUCCCCCCCUCCUCAAUCUCUCUAGCUUUGAUUGGAUCGAGAGAAGAUCGAUCGAUCGAUCCAAGAAGAGUUCUGAGAAGGGGGAUGAAGAGAGUAGACGUAUGUGUGUAGAUCUCGGACCAGGCUUCAUUCCCCCCAAAUACAAGGGCUCCCAUGAUCUCUGCCUC
pyr-4400	CGGACCAGGCUUCAUUCCCC	bdi-MIR166c	-67.20	0.86	DangsuA,DangsuB	UGAAGAUGUGAAGCUAUUUUGCUUCUGGGUGGAAUGUUGUCUGGUUCAAGGUCUUGCCAUGUGAUUUGAGGAUGAACGGUUUGUGCAUGCAUAACUUUCAUUUCUCUUGUUUGCGGGAUCUCGGACCAGGCUUCAUUCCCCUCAGAGAUAGCUUCAAACUCGAGAUCUAGCC
pyr-4400	CGGACCAGGCUUCAUUCCCC	bdi-MIR166d	-69.10	0.77	DangsuA,DangsuB	UCGCUGGUGCAUGUAUGGCGCAGUUGAGGGGAAUGUUGUCUGGUUGGAGACCUAGCUAGCAGCUAGCACGGAUCAUCCAUAGAUCGAUUCGACGCUGCAUAUGCGCGCGGUUUCGGACCAGGCUUCAUUCCCCCCAACUCUCAACUCGAUCGAUCUUCUUCGCUC
pyr-4400	CGGACCAGGCUUCAUUCCCC	bdi-MIR166e	-72.30	0.96	DangsuA,DangsuB	GGGAUAGCAAAGGGGGAGCUUUUUUACUUUGAGGGGAAUGUUGUCUGGCUCGAGGUGCUGAGAUCGAGAGAACUUGAAAUUCGAUCUCUAGAUUGAUCUCGGACCAGGCUUCAUUCCCCUCAAGUAAAGCUCCCGUGUGGCCUGCGAUUCU
pyr-4400	CGGACCAGGCUUCAUUCCCC	gma-MIR166b	-60.60	0.79	DangsuA,DangsuB	GCUUGCAAAGGUGAGGUUGAGAGGAAUGUUGUCUGGCUCGAGGUCAUGGAGGAGGAGGAGGAGUAGAGUACUGAGAUCAGUGAAAGUUUCCAAUGGAAAUUUACCCUCUUACACAAAAAAAUGAUUCUCGGACCAGGCUUCAUUCCCCCCACCCAACUUUUGCUUUU
pyr-4400	CGGACCAGGCUUCAUUCCCC	gma-MIR166c	-52.80	0.88	DangsuA,DangsuB	GCUUUGUGUUUUGAGGGGAAUGUUGUCUGGCUCGAGGACCCUUCUUCUUCUUGAUCUUGUGUAGACUGCUAUACCUGUGGUCAAGGAAUGCUUAGUGUUUUCGGACCAGGCUUCAUUCCCCCCAAUUAUA
pyr-4400	CGGACCAGGCUUCAUUCCCC	gma-MIR166a	-59.90	0.91	DangsuA,DangsuB	ACGGAAGCUUUGUCUUUUGAGGGGAAUGUUGUCUGGCUCGAGGACCCUUCUUCAUCUUGAUCUUGUGUAGACUACUAUGCUUGUGGUCAAGGAAUACAUAGUGUUGUCGGACCAGGCUUCAUUCCCCCCAAUUAUAUGCUUCCAAA
pyr-4400	CGGACCAGGCUUCAUUCCCC	gma-MIR166f	-54.40	1.03	DangsuA,DangsuB	AUGAAGGAGUUGAGGGGAAUGGUGUCUGGUUCGAGACCAUUCUUCUGAAGCAAAGAUCAUCAUCACCCUUGAGAAUGAUCUCGGACCAGGCUUCAUUCCCCCUAGCUCAA
pyr-4400	CGGACCAGGCUUCAUUCCCC	gma-MIR166g	-57.70	1.15	DangsuA,DangsuB	AAAAGUUGAGGGGAAUGUCGUUUGGUUCGAGAUCAUUCAUGCAAGUAGUCUCAGACAUAACUCUUCUGAGUGAUUUCGGACCAGGCUUCAUUCCCCUCAGCUACCAAGCA
pyr-4400	CGGACCAGGCUUCAUUCCCC	gma-MIR166d	-54.00	1.02	DangsuA,DangsuB	AGGAGUUGAGGGGAAUGGUGUCUGGUUCGAGACCAUUCUUCUGAAGCAAAGAUCAUCAUCAUCACCCUUGAGAAUGAUCUCGGACCAGGCUUCAUUCCCCCUAGCUCAAA
pyr-4400	CGGACCAGGCUUCAUUCCCC	gma-MIR166e	-47.60	0.90	DangsuA,DangsuB	AGGUGUUGAGGGGAAUGUUGGCUGGCUCGAGGCUUUUCAAAGAGGAGGUUCUCACUGGCAAGAACUAUAAGGCUUCGGACCAGGCUUCAUUCCCCUCAAAAAUUGUGUUU
pyr-4400	CGGACCAGGCUUCAUUCCCC	ptc-MIR166h	-41.80	0.89	DangsuA,DangsuB	ACACAGUUGAGGGGAAUGCUGUCUGAUUCGAGACCAUUCACUUUAAGCACACAUUCAUCUUUCGAAUGAUCUCGGACCAGGCUUCAUUCCCCCCAACUCAA
pyr-4400	CGGACCAGGCUUCAUUCCCC	gma-MIR166i	-58.10	1.19	DangsuA,DangsuB	GUUGAGGGGAAUGUCGUCUGGUUCGAGACCAUUCAUGCAAGUAGUCUCAGACAUGACUCUUCUGAGUGAUUUCGGACCAGGCUUCAUUCCCCUCAGC
pyr-4400	CGGACCAGGCUUCAUUCCCC	gma-MIR166n	-46.60	0.70	DangsuA,DangsuB	AGGUUGAGAGGAAUGUUGUCUGGCUCGAGGUCAUGGAGGAAGAGGAGAGUACUGAGAUCAGUGAAAGUUUCCAAUGGAAAUUUACCCUCUUAACACACACACAGAAAAAAUGAUUCUCGGACCAGGCUUCAUUCCCCCCACCC
pyr-4400	CGGACCAGGCUUCAUUCCCC	gma-MIR166o	-51.70	0.94	DangsuA,DangsuB	AUGUUGAGAGGAAUGUUGUCUGGCUCGAGGUCAUGAUAUGGAGAUAUAUAUGAAAGUGUUUCAGUUAAAUUCCAGGGUAUAUAAAUUAAUGGAAAUUAAUUUAUACCCUAAAUGAUUCUCGGACCAGGCUUCAUUCCCCCCAGCC
pyr-4400	CGGACCAGGCUUCAUUCCCC	gma-MIR166m	-43.50	0.60	DangsuA,DangsuB	UUUCGUUGCAAAGGUGAGGUUGAGAGGAAUGUUGUCUGGCUCGAGGUCAUGGAGGAGGAGGAGAGUAUUGAGAUGAGUGAAAGUUUCCAAUGGAAAUUUACCCUCUUAACACAAAAAAAAAAAUUGAUUCGCGGACCAGGCUUCAUUCCCCACACCCAACUUUUUUUUUUAUUCCU
pyr-4400	CGGACCAGGCUUCAUUCCCC	aly-MIR166g	-48.50	0.90	DangsuA,DangsuB	GGAAGCGAUUUAGGGUUUAGAGGAAUGUUGUUUGGCUCGAGGUCAUGGAGAGUAAUUCGUUACCAAAACACAAAACUCUAAAUGAUUCUCGGACCAGGCUUCAUUCCCCUCAACCUAUUUUAUCGCAUUUU
pyr-4400	CGGACCAGGCUUCAUUCCCC	aly-MIR166f	-43.80	0.95	DangsuA,DangsuB	AAGUUCAGGUGAAUGAUGCCUGGCUCGAGACCAUUCCAUCUCAUGAUCAUGAUGAUGAUAUAAUGAUGAUGAUGAUGUCGGACCAGGCUUCAUUCCCCUCAACUU
pyr-4400	CGGACCAGGCUUCAUUCCCC	aly-MIR166e	-56.60	0.75	DangsuA,DangsuB	GAGUCCAUGUUCUUCAGUGAAGCUUUUUCUUUUGAGGGGAAUGUUGUCUGGCACGAGGCCCUUAACUUAGAUCUAUAUUUGAUUUUAUGUCUCUUCUUUAUUUAUUAGUCUAUAUAUACAUGAAUGAUCGAUUUUAACGGUUAAUGACGUCGGACCAGGCUUCAUUCCCCUCAAUUAUAUCGCUUCUUCGAUCUUGGCUU
pyr-4400	CGGACCAGGCUUCAUUCCCC	aly-MIR166d	-40.20	0.82	DangsuA,DangsuB	GGUUGAGAGGAAUGUUGUCUGGCUCGAGGUCAUGAAGAAGAUCAUUAGAUUGAUUCAUCUUAAAGAAUGAAAACCCUAAAUGAUUCUCGGACCAGGCUUCAUUCCCCCCAACC
pyr-4400	CGGACCAGGCUUCAUUCCCC	aly-MIR166c	-45.80	0.85	DangsuA,DangsuB	GGUUGAGAGGAAUGUUGUCUGGCUCGAGGUCAUGAAGGAGAGGAUAUCACUCCAAUUAAUUUGGAAGAACGAAUUAAGAAACCCUAAAUGAUUCUCGGACCAGGCUUCAUUCCCCCUAACC
pyr-4400	CGGACCAGGCUUCAUUCCCC	aly-MIR166b	-58.70	0.95	DangsuA,DangsuB	AGAGGGAUUUUUCUUUUGAGGGGACUGUUGUCUGGCUCGAGGUCUCUUAUUCUAAUACAAUCUCAUUUCAAUAGUCUCAGAUCUGAUGAUUGAUUAGGGUUUUAGCAUCUCGGACCAGGCUUCAUUCCCCCCAAUUAUUACUCCCUCU
pyr-4400	CGGACCAGGCUUCAUUCCCC	aly-MIR166a	-64.00	0.81	DangsuA,DangsuB	GGGGUUUUCUCUUUUGAGGGGAAUGUUGUCUGGCUCGAGGACUCUGGCUCGCUCUAUUCAUGUUGGAUCUUUUUCGAUCUAAUAAUCGAAUUGAACCUCCAGAUUUCAGAUCUGACUAGGGUUUUAGCGUCGUCGGACCAGGCUUCAUUCCCCCCAAUUGUUGCUCC
pyr-4400	CGGACCAGGCUUCAUUCCCC	pvu-MIR166a	-174.50	0.66	DangsuA,DangsuB	AUCAGUUUCUACUUUCUAAUCAUCAACUUCUUCAAACACAUCAUAUGAAUAUAGCUACCUAGGUGCUGUUUUCUUUUCCAACUUCCUCAUAUCUUGUUCAUUCCUUGCAAAGGUGAGGUUGAGAGGAAUGUUGUCUGGCUCGAGGUCAUGGAGGAGGAGAGUUCUCAGAUAAACUCUUUCACCCAAAGUUUCCAAUGGAAAUUUACCCUCUAACACCAAAAUGAUUCUCGGACCAGGCUUCAUUCCCCCCACCCAACUUUUGCUAUUUUCUUUCUCGUAAUCUUCAUAUUUUGCAUGCCCCCAUGCUUGUUUUUGCAGGAUCAGAAUUUUCAACUCACUACCCAUCUUCUUUUGUUUUACCUGUAAAUAUCUUUAUAAAGGCCGGUGAAAAUUAUAGGG…
pyr-4400	CGGACCAGGCUUCAUUCCCC	ptc-MIR166j	-46.50	0.82	DangsuA,DangsuB	UCUUUUUUGAGGGGAAUGUUGUCUGGCUCGAGGACUUUUUGUUCAUCAAUCUAAUCGAACUUUCUACCUGUAGAUCUAGUAUCUUAUUUAAGAUUGAUCACGUAUUAGGGUUGUCGGACCAGGCUUCAUUCCCCCCAAUCAUU
pyr-4400	CGGACCAGGCUUCAUUCCCC	aly-MIR166h	-43.80	0.95	DangsuA,DangsuB	AAGUUCAGGUGAAUGAUGCCUGGCUCGAGACCAUUCCAUCUCAUGAUCAUGAUGAUGAUAUAAUGAUGAUGAUGAUGUCGGACCAGGCUUCAUUCCCCUCAACUU
pyr-4400	CGGACCAGGCUUCAUUCCCC	ata-MIR166e	-65.60	0.92	DangsuA,DangsuB	GCAGUUGAGGGGAAUGUUGUCUGGUUGGAGACCUGGCUCGCACGACGGAUCGAUCGGCGGCGGGCGUGCGCGCGCGGUUUCGGACCAGGCUUCAUUCCCCCCAACUCAAC
pyr-4400	CGGACCAGGCUUCAUUCCCC	ata-MIR166d	-76.10	0.81	DangsuA,DangsuB	CGUUUUGAGGGGAAUGUUGUCUGGCUCGGGGCUCUCUUUCUUUCUCUCUCUCUAUCCUCCUCCCCUCGACCCCUCCUUGAUCAGAUCGAGAGAAAGGUCGAAGAUCCGAUGAGGGGGGAGAAGAGAGUAGACGUGCGUAGAUCUCGGACCAGGCUUCAUUCCCCCCAAAGACAA
pyr-4400	CGGACCAGGCUUCAUUCCCC	ata-MIR166b	-61.30	0.99	DangsuA,DangsuB	CAUGGUUGUCGAGGGGAAUGACGCCGGGUCCGAAAGAGAGACGCGCGCAUGGCGUGCGUGUGGCGCGUUUCGGACCAGGCUUCAUUCCCCAUGACUCCAU
pyr-4400	CGGACCAGGCUUCAUUCCCC	ata-MIR166a	-50.40	0.85	DangsuA,DangsuB	GCUUCUGGGUGGAAUGUUGUCUGGUUCAAGGUCUCGCUCUGGUUUGAGGAUGGAAACCUUUCAUUUCUCUCAGCUUCCUGCGAUCUCGGACCAGGCUUCAUUCCCCUCAGAGAUAG
pyr-4400	CGGACCAGGCUUCAUUCCCC	zma-MIR166a	-72.72	0.60	DangsuA,DangsuB	UGAGGGGAAUGUUGUCUGGCUCGGGGCCGCCGCCGCCGCUCCUUCCUUCUCUAGUCUCUCUUCUCUCCUAGCAGCUACUCUUCGCUUCCUACUCCUAUCUCGAUCCCUCUCUUCUUCUUCUUCUUCUUCUUCCUCUUCCCCCCUCUCUUGGAUCGAGACCGAGCGGACGGAGACGAGUGGUGUAGAUCUCGGACCAGGCUUCAUUCCCCCCAA
pyr-4400	CGGACCAGGCUUCAUUCCCC	ptc-MIR166m	-46.80	0.87	DangsuA,DangsuB	UGAGGAUGUGGGGGAAUGUCGUCUGACUCGAGACAACAGGUAAACUGAAGGAAUGGCCGGAGUUUAAGAGUUCUCUCGGACCAGGCUUCAUUCCCCUCAUCCACA
pyr-4400	CGGACCAGGCUUCAUUCCCC	cme-MIR166b	-42.50	1.01	DangsuA,DangsuB	UUGAGGGGAAUGUUGUCUGGCUCGAGGACACUUUUAUUCGAUCUUUUGAUUUUUGUGUUUAUAUUUAGUGUCGUCGGACCAGGCUUCAUUCCCCCCAAUUAAU
pyr-4400	CGGACCAGGCUUCAUUCCCC	cme-MIR166c	-56.70	0.96	DangsuA,DangsuB	UUGAGGGGAAUGUUGUCUGGCUCGAGGUCACUUUUUUCUCUAAAAUUAAUUCCAUCUUUCGUUUUAAUUUCAAACAAAUUACUACGAUCGACGAAUUGAUUCAUUCGAAACGAAGUGUCGUCGGACCAGGCUUCAUUCCCCCCACAAAUU
pyr-4400	CGGACCAGGCUUCAUUCCCC	cme-MIR166a	-46.50	0.93	DangsuA,DangsuB	UUGAGGGGAAUGCUGUCUGGUUCGAGACCGUUUAUCUGAUAUCUGUCAUGUUUCCAUGGUGAGAACGAUCUCGGACCAGGCUUCAUUCCCCCCAACUCGAA
pyr-4400	CGGACCAGGCUUCAUUCCCC	cme-MIR166f	-44.20	0.92	DangsuA,DangsuB	UUGAGGGGAAUGUUGUCUGGCUCGAGGACACUUGUUCUUUUUCAUCCACUUCUUGAAUUCAUUAGUGUCGUCGGACCAGGCUUCAUUCCCCCCAAUUGCC
pyr-4400	CGGACCAGGCUUCAUUCCCC	cme-MIR166d	-50.30	1.12	DangsuA,DangsuB	UUGAGGGGAAUGUUGUCUGGUGCGAGAUCUUUCAUUUCUUUUGAAUUUUUGAUAAACCCUUCAAAUUACAACUCUUACUUUUGAAUGAUUUCGGACCAGGCUUCAUUCCCCUCAACAAAAC
pyr-4400	CGGACCAGGCUUCAUUCCCC	cme-MIR166h	-58.20	1.04	DangsuA,DangsuB	UUGUGAGGAAUGUUGGCUGGCUCGAGGCUUUUCAAAACAAAGAUGUUCUUUUUUCUUUUUUUUUUCCUUUUUUUCAACUUGGAAAAAGAAGAGAAAAGAAAAGAAGAGAGAACUUUUAGGCUUCGGACCAGGCUUCAUUCCCCUCAACUCAAA
pyr-4400	CGGACCAGGCUUCAUUCCCC	ppe-MIR166e	-63.90	0.97	DangsuA,DangsuB	GUUUUUGAGGGGAAUGUUGUCUGGCUCGAGGCCCCUAACUAGAUCCAUGAUCUUCAUCUCAAUUGAUGUCAAUUUUAAUCAACAAUAUAGACUCAGUUGAGACAGAUCAUUUGGUUCUACAUUUAGUGACGUCGGACCAGGCUUCAUUCCCCCCAAUUAU
pyr-4400	CGGACCAGGCUUCAUUCCCC	ppe-MIR166b	-54.80	1.17	DangsuA,DangsuB	AGUUGAGGGGAAUGUCGUCUGGUUCGAGAUCCUUCACAACCGUGGAGCUUAAGCAUAGUCUGAAUGAUUUCGGACCAGGCUUCAUUCCCCUCAACU
pyr-4400	CGGACCAGGCUUCAUUCCCC	ppe-MIR166c	-70.60	0.84	DangsuA,DangsuB	GGAAGCAUGUCCUUUUGAGGGGAAUGUUGUCUGGCACGAGGCCACCAAUCUUGGUUCCUUCCAAAUUUCAAUCCAUACCGAUCUUUGAUCAGAAUUUACGUUCUACGUACAGACGCUCAGGGACUGUGUAUGUUAGUGUCCUCGGACCAGGCUUCAUUCCCCUCAAUUCACUGCUUUC
pyr-4400	CGGACCAGGCUUCAUUCCCC	ppe-MIR166a	-47.90	1.02	DangsuA,DangsuB	GUUGAGGGGAAUGCUGUCUGGUUCGAGACCAUUCCUUUGAAGCAAGAAACAUGAUCAUCCGAAUGAUCUCGGACCAGGCUUCAUUCCCCCCAAC
pyr-4400	CGGACCAGGCUUCAUUCCCC	nta-MIR166d	-72.40	0.93	DangsuA,DangsuB	UGUUUUGAGGGGAAUGUUGUCUGGCUCGAGGUCACUAACUUGAUCCAAUUUGAACUCUCUUUCCCUUUUUGAGAUGUCAUCUCCAUUAAUUAGCAAAUAGAUCAAUAGUUCUUGAUUGACAUUCUCUAUUAAGAGGGAUCAUGGAUCAUGGUUUAGUGUCGUCGGACCAGGCUUCAUUCCCCCCAAAUCUUG
pyr-4400	CGGACCAGGCUUCAUUCCCC	nta-MIR166e	-68.50	0.99	DangsuA,DangsuB	UCAGUUGAGGGGAAUGUUGUCUGGCUCGAGGUCACCAACUAGAUCCAUAAGCUCCACUUUAUGCUUAUUUGAACAUAAAGAUUAGUUUUGUAAUAUAAAGAUUCGUUGAUUAUAUGAAAAGGGGUUAUGGAUCAUGAGUUAGUGUUGUCGGACCAGGCUUCAUUCCCCCCAAUUGUUA
pyr-4400	CGGACCAGGCUUCAUUCCCC	nta-MIR166f	-54.50	0.85	DangsuA,DangsuB	AGCUUUGAGGGGAAUGUUGUCUGGCUCGAAGCCACUAUCUCCUCUUGAUUUAACCUAGUUCAAGAAGUAGUAUGAGUAUUUUUGUCAAAGUUGUAUGAACAAACAAUAAUGAGAGAUAGUGUCGUCGGACCAGGCUUCAUUCCCCCCAAUUUGGA
pyr-4400	CGGACCAGGCUUCAUUCCCC	nta-MIR166g	-38.00	0.83	DangsuA,DangsuB	UUUGUUAAGGAGAAUGUUGUCUGGUUCGUGACCAAUCUGUAAACAGUAAUUAGCUAACUGUCAACAUUCAUCACUUGAAUGAUCUCGGACCAGGCUUCAUUCCCCUCAACUCAA
pyr-4400	CGGACCAGGCUUCAUUCCCC	nta-MIR166a	-65.70	0.90	DangsuA,DangsuB	UGUUUUGAGGGGAAUGUUGUCUGGCUCGAGGUCACUAACUUGAUCCAAUUAUUUGAACUCUCUUUCCCUUUUUGAGAUGUCAUCUCCAUUAAUUAACAAAUAGAUCAAUAGUUCUUGAUUGGCAUUAGGGAUCAUGGAUCAUGGUUUAGUGUCGUCGGACCAGGCUUCAUUCCCCCCAAAAUUU
pyr-4400	CGGACCAGGCUUCAUUCCCC	nta-MIR166b	-44.40	0.75	DangsuA,DangsuB	AGCUUUGAGGGGAAUGUUGUCUGGCUCGAAGCCAUUAUCUCCUCUUGAUUUAACCUACUUCUUCUUAACUUCAAAAAUAGCAGAACAAACAAUCAUGAGAUAGUGUCGUCGGACCAGGCUUCAUUCCCCCCAAUUUGGA
pyr-4400	CGGACCAGGCUUCAUUCCCC	bdi-MIR166i	-65.90	0.82	DangsuA,DangsuB	UCUUGUUGAGGGGCAUGUCGUGUGGCCCGAGACCGGUUCAUGGCCGUCGAUCGGUCGGCUAAUGUCGCCGGCGGCGCGCGUCAGUGGAUGGUCUCGGACCAGGCUUCAUUCCCCCCAACGGC
pyr-4400	CGGACCAGGCUUCAUUCCCC	mes-MIR166f	-55.00	1.00	DangsuA,DangsuB	UUGAGGGGAAUGUUGUCUGGCUCGAGGCCACUAACUAGAUCUAUGAUUUUAUCUCUGAAAUCAUUAAUUUAAUUCAUUUUCGUUGUUGAGAUAUGAUUUAUCAUGAGUUAGUGACGUCGGACCAGGCUUCAUUCCCCCCAA
pyr-4400	CGGACCAGGCUUCAUUCCCC	mes-MIR166g	-57.40	1.08	DangsuA,DangsuB	UUGAGGGGAAUGUUGUCUGGCUCGAGGCCACUAACUAGAUCUGUAAUUUUUAUCUCUGAAUUUGUAUUGAGAUAUGAUUGAUGAUCAUGAGUUAGUGACGUCGGACCAGGCUUCAUUCCCCCCAA
pyr-4400	CGGACCAGGCUUCAUUCCCC	mes-MIR166d	-42.20	0.83	DangsuA,DangsuB	UUGAGGGGAAUGUUGUCUGGCUCGAGGACUCUCUUUUGAUGCUUUUACAUACAGAUCUAAGCAUAUUGAUCAACUGCUAGUGUCGUCGGACCAGGCUUCAUUCCCCCCAA
pyr-4400	CGGACCAGGCUUCAUUCCCC	mes-MIR166e	-49.60	1.08	DangsuA,DangsuB	AGUUGAGGGGAAUGCUGUCUGGUUCGAGACCAUUCACUUGGAACAUAUUCAAACAGCUACUGAAUGAUCUCGGACCAGGCUUCAUUCCCCCCAACU
pyr-4400	CGGACCAGGCUUCAUUCCCC	mes-MIR166b	-49.40	1.05	DangsuA,DangsuB	AGUUGAGGGGAAUGCUGUCUGGUUCGAGACCAUUCACUUGGAACUUUACUCAAACAGCUUCUGAAUGAUCUCGGACCAGGCUUCAUUCCCCCCAACU
pyr-4400	CGGACCAGGCUUCAUUCCCC	mes-MIR166c	-41.70	1.19	DangsuA,DangsuB	UUGAGGGGAAUGUUGUCUGGUUCAAGGUCAUAUGAUGCUUUAUAGUUUCUCCUCGGACCAGGCUUCAUUCCCCUCAA
pyr-4400	CGGACCAGGCUUCAUUCCCC	mes-MIR166a	-45.80	1.04	DangsuA,DangsuB	GUUGAGGGGAAUGUUGUCUGGCUCGAUGUCAUUCAUGUGAAGCUCAACGUUAACUGAUGAAUGAUUUCGGACCAGGCUUCAUUCCCCCCAAC
pyr-4400	CGGACCAGGCUUCAUUCCCC	ptc-MIR166f	-52.50	1.07	DangsuA,DangsuB	GGUGUGUUGAGGGGAAUGUUGGCUGGCUCGAAGCUUAAGCAAAGAGUUUCCUAACAUGAAACAACUGUUAAGGCUUCGGACCAGGCUUCAUUCCCCUCAAACAUA
pyr-4400	CGGACCAGGCUUCAUUCCCC	ghr-MIR166b	-62.80	0.94	DangsuA,DangsuB	UGAGGGGAAUGUUGUCUGGACCGGGGACACUUGUGUUUCUAAUCCGUUUUCCCUGCAAUAUUGUUCUGAUUAACGUGGGGAUCUUUAUAUUGCUUAUUUUUGUAAUGGAUUAAGGUUGUACUAGUGUCGUCGGACCAGGCUUCAUUCCCCCCAA
pyr-4400	CGGACCAGGCUUCAUUCCCC	ppe-MIR166d	-69.30	1.05	DangsuA,DangsuB	GAAGCUUUAGCUUUUGAGGGGAAUGUUGUCUGGCUCGAGGACACUUUUCCUUGAUCUGUAUUUCUUAUAGAUCAACCUGUAUAUUUAUAUCUAGGUAUACAUAUAUAUGGCUUUUGGUGAAUUAGUGUCGUCGGACCAGGCUUCAUUCCCCCCAAUUUAUGGCUUC
pyr-4400	CGGACCAGGCUUCAUUCCCC	hbr-MIR166b	-48.90	1.00	DangsuA,DangsuB	UUCUAUUAACAGUUGAGGGGAAUGUUGUCUGGUUCGAUGUCAUUCAUCUGAAGCUCAAAUUAACCUUAACUGAAUGAUUUCGGACCAGGCUUCAUUCCCCCCAACAGGGUUUGAUUUGAU
pyr-4400	CGGACCAGGCUUCAUUCCCC	tcc-MIR166d	-55.10	1.02	DangsuA,DangsuB	GAAGUCUUGAACAGUUGAGGGGAAUGCUGUCUGGUUCGAGACCGUUCAUUUGAAGCUCUAGACUUCAUCAGAAUGAUCUCGGACCAGGCUUCAUUCCCCCCAACUUAUGGAAUAUAUAC
pyr-4400	CGGACCAGGCUUCAUUCCCC	lus-MIR166c	-51.70	0.96	DangsuA,DangsuB	GAAGCUUGUGUCUUUUGUGGGGAAUGUCGUCUGGUCCAAGGCUAGGUAGCUAGCUAGAAUAGUAGUUGUAUUGUCCUCGGACCAGGCUUCAUUCCCCUCAAUUACUCUUGCUUC
pyr-4400	CGGACCAGGCUUCAUUCCCC	lus-MIR166a	-57.10	0.85	DangsuA,DangsuB	GAAAGAAAGAAGCUUGUGUUUUUUGUGGGGAAUAUUGUCUGGUCCAAGGCUAGCUAGCUAGCUAGCUAGUGGUAGUGGUGAUCUGCUCAGUUACUCCUCGGACCAGGCUUCAUUCCCCUCAACUACUCUUGCUCUUGCUUC
pyr-4400	CGGACCAGGCUUCAUUCCCC	lus-MIR166g	-42.40	0.88	DangsuA,DangsuB	CUUUUGAGGGGAAUGUUGUCUGGCUCGAGGCCACUCUUGCUCGGAUUUAUGAUUCGAUUAGUGACGUCGGACCAGGCUUCAUUCCCCCCAAUUG
pyr-4400	CGGACCAGGCUUCAUUCCCC	lus-MIR166d	-51.80	0.94	DangsuA,DangsuB	GUAGGAUGUUAGAGUUGAGGGGAAUGCUGUCUGGUUCGAGACCAUUCAUUCAUUCAUCUUUCCAGAUAUGAACGACCUCGGACCAGGCUUCAUUCCCCCCAACUUCCAACAUUUCAC
pyr-4400	CGGACCAGGCUUCAUUCCCC	lus-MIR166k	-28.40	0.84	DangsuA,DangsuB	AGGGGAAUUUCGACUGGUUCGAUGUGAUCCAAUUAUUUAACCUUCUACCAUCGGACCAGGCUUCAUUCCCCC
pyr-4400	CGGACCAGGCUUCAUUCCCC	lus-MIR166j	-45.40	0.89	DangsuA,DangsuB	AGGGGAAUGUUGUCUGGCCCGAAGCCUCUAUUGACAAUGGCCGAAGAUCAAAUUCGGGAGAUGGGUUUAGCGACUUCGGACCAGGCUUCAUUCCCC
pyr-4400	CGGACCAGGCUUCAUUCCCC	lus-MIR166i	-43.10	0.76	DangsuA,DangsuB	UUGAGGGGAAUGUUGUCUGGCUCGAGGCCACUAUAGUAUUCAGAUCUCUUCUCUUCUUCUUGGCCGGGUUCUUUUAUCCGAUUAGUGACGUCGGACCAGGCUUCAUUCCCCCCAA
pyr-4400	CGGACCAGGCUUCAUUCCCC	lus-MIR166h	-74.40	0.87	DangsuA,DangsuB	GAAUCGUAAAGAAGGCUGGGAGCUUUUUAAUAUCUUUUGAGGGGAAUGUUGUCUGGCUCGAAGCCGCUAUUAACAAUGGCCGAUGAGAAAUUCGGCAGAUAGGUUUAGCGACUUCGGACCAGGCUUCAUUCCCCCCAAUUGCUUUGCUCCAGUUCCCUCUAAUUAUUCCCGAUCUGGACGAUUC
pyr-4400	CGGACCAGGCUUCAUUCCCC	rco-MIR166c	-39.20	1.01	DangsuA,DangsuB	UGAGGUGAAUGUUGUCUGGUUCGAUGUCAUUCAUUUUGUGAAGCUGAAACAUUAACUGAAUGAUUUCGGACCAGGCUUCAUUCCCCCCAAC
pyr-4400	CGGACCAGGCUUCAUUCCCC	rco-MIR166b	-57.80	1.18	DangsuA,DangsuB	UGAGGGGAAUGUUGUCUGGCUCGAGGUCACUAAUUAGAUCUAUGAUUUUAUUUUUGCUUUUAAGAUAGAUCGUUGAUCGUAUUGUUAGUGACGUCGGACCAGGCUUCAUUCCCCCCAAU
pyr-4400	CGGACCAGGCUUCAUUCCCC	rco-MIR166a	-57.50	0.97	DangsuA,DangsuB	UAAGGGGAAUGUUGUCUGGUUCAAGGCCUACCUAUUGAUCUGUUUCAGUUUCAUUCAAUAUACUGAAAAAUCUGUAUAUGGGAAACUAUCCUGUGGUCGAUUUGAUCAUUUCUUAGGAUCUCCUCGGACCAGGCUUCAUUCCCCUUAAU
pyr-4400	CGGACCAGGCUUCAUUCCCC	rco-MIR166e	-53.10	0.86	DangsuA,DangsuB	UGAGGGGAAUGUUGUCUGGCUCGAGGACUCUCUUUUGAUCCCUUUCAAUUUUCUCCAUAGAUCCAAUACGGAUAUUGGGAGUGGGUAGAUCAUUUGACAGUGUCGUCGGACCAGGCUUCAUUCCCCCCAAU
pyr-4400	CGGACCAGGCUUCAUUCCCC	rco-MIR166d	-50.90	1.02	DangsuA,DangsuB	UGAGGGGAAUGCUGUCUGGUUCGAGACCAUUCGCUUGAUGCCACCCAUCACAGCUUCUGAAUGAUCUCGGACCAGGCUUCAUUCCCCCCAAC
pyr-4400	CGGACCAGGCUUCAUUCCCC	nta-MIR166c	-50.30	1.12	DangsuA,DangsuB	UCUGUUGAGGGGAAUGCUGUCUGGUUCGAAACCAUUCACCAAAGUAUGAUCAAGAGUUUGAUUAUUUGAAUGAUUUCGGACCAGGCUUCAUUCCCCCCAACUCUA
pyr-4400	CGGACCAGGCUUCAUUCCCC	dpr-MIR166b	-46.80	0.82	DangsuA,DangsuB	UUGAGGGGACUGUUGUCUGGCCUGAGGCCACCAACAAGAUCUAUAUGUCAAAUCUUGAUCUAAUCUUUGUAAUCUAGUUACAGUUAGAUCAUGUGUUAGUGACGUCGGACCAGGCUUCAUUCCCCCCAA
pyr-4400	CGGACCAGGCUUCAUUCCCC	sbi-MIR166j	-49.20	0.88	DangsuA,DangsuB	UGUGGAAUGUUGUCUGGUUCUAGGCCUCUCUCUACAUGCAAGCAUGGAUGUAGUAGCAGCCUACUGCAAUUGCUUGCUGGGACCUCGGACCAGGCUUCAUUCCCCUCA
pyr-4400	CGGACCAGGCUUCAUUCCCC	sbi-MIR166i	-48.30	0.81	DangsuA,DangsuB	GGAAUGUCGUCUGGCGCGAGACCGGCCGGACAGUCGGCCGGCGGCGUCCUCUGGAUCGGACGGUCUCGGACCAGGCUUCAUUCCCC
pyr-4400	CGGACCAGGCUUCAUUCCCC	sbi-MIR166h	-80.08	0.70	DangsuA,DangsuB	AGGGGAAUGUUGUCUGGCUCGGGGGCGCCGCCGCUCCGCUCCGCUCCUUCCUUCUCUGGUCUCUCUCUCUCCCCUAGUCUUCGCGCGCUUCCUCAAUCUCCAUCGUCUCUUCCUCCUUCUCUUGGAGACCAGCAGGAGGACGGAGGCGGGUGGUGUAGAUCUCGGACCAGGCUUCAUUCCCCCCA
pyr-4400	CGGACCAGGCUUCAUUCCCC	sbi-MIR166c	-55.90	1.05	DangsuA,DangsuB	GGGGAAUGUUGUCUGGUCGGAGACCUAACACCGCGAAUCAUCCAUGGAGCAGCAUGCAUGGUGGUGGAUGGUUUCGGACCAGGCUUCAUUCCCC
pyr-4400	CGGACCAGGCUUCAUUCCCC	nta-MIR166h	-53.00	1.00	DangsuA,DangsuB	UCUAUUGUGGGGAAUGUUGUUUGGCUCGAGGAUUCUUCAAUCUUGAUCAAAUUCUUUCUAUUUUUUAUAGAUCUGCAUAUUAAUAUAGAUCUAUAAUAUUGAAUCAUGAUUUUGGUGUCGUCGGACCAGGCUUCAUUCCCCUCAAAGAUUGC
pyr-4400	CGGACCAGGCUUCAUUCCCC	sbi-MIR166a	-48.10	1.05	DangsuA,DangsuB	GUGGAAUGUUGUCUGGUUCAAGGUCUCGCUUGUGAUUUAAGGAUGAUUUGUGCAUGCGUAAUUUUUAUUCCUUGAAUCUAUGAGAUCUCGGACCAGGCUUCAUUCCCC
pyr-4400	CGGACCAGGCUUCAUUCCCC	aqc-MIR166e	-61.10	0.93	DangsuA,DangsuB	UUGAGAGGAAUGUUGUCUGGUUCGAGGCCACUAACUUAACAACUCUUAAUUGAAACUCAAUCUAUAACCGGUUAGCAAGUGAAAGCGCUUGCGCUCGCUGGUGUUUGUUUGUUUGUGUCGUCGGACCAGGCUUCAUUCCCCUCAAUU
pyr-4400	CGGACCAGGCUUCAUUCCCC	aqc-MIR166b	-44.90	1.10	DangsuA,DangsuB	UUGUGGGGAGUGUUGUCUGGUUCGAGACCAUUCAUUUGAUACAUAUUUAGCUGUCAACUGUAUGAUUUCGGACCAGGCUUCAUUCCCCCCAAUU
pyr-4400	CGGACCAGGCUUCAUUCCCC	sbi-MIR166d	-47.50	1.03	DangsuA,DangsuB	GGGGAAUGUUGUCUGGCUCGAGGUGCAGGAACAUGCAGAUCUCAUCGGUCUAGAUUGUUGUUGAUCUCGGACCAGGCUUCAUUCCCC
pyr-4400	CGGACCAGGCUUCAUUCCCC	zma-MIR166i	-55.20	1.02	DangsuA,DangsuB	GGGGAAUGUCGUCUGGCGCGAGACCGUACCAGACGACGUGCUCUCUCGGUCGUCGGACGGUCUCGGACCAGGCUUCAUUCCCC
pyr-4400	CGGACCAGGCUUCAUUCCCC	zma-MIR166h	-48.60	0.90	DangsuA,DangsuB	GGGGAAUGACGUCCGGUCCGAACGAGCCACGGCUGCUGCUGCGCCGCCGCGGGCUUCGGACCAGGCUUCAUUCCCC
pyr-4400	CGGACCAGGCUUCAUUCCCC	zma-MIR166c	-45.30	0.91	DangsuA,DangsuB	GGGGAAUGUUGUCUGGCUCGAGGUGCAGAAACACGCAGAUCUCAUCGAGGUCGUCUUGGUUGUUGUUGAUCUCGGACCAGGCUUCAUUCCCC
pyr-4400	CGGACCAGGCUUCAUUCCCC	hvu-MIR166b	-62.40	1.02	DangsuA,DangsuB	GGGGAAUGUUGUCUGGUCCGAGACCUAACACCGGGCGGAAUGGCGGAUUCAGCUGCAGCUAAGCAAGCUAGGUGGGGGGUUUCGGACCAGGCUUCAUUCCCC
pyr-4400	CGGACCAGGCUUCAUUCCCC	zma-MIR166f	-48.40	0.91	DangsuA,DangsuB	GGGGAAUGACGUCCGGUCCGAACAAGCCACGGCUGCUGCUGCGCUACCGCCGCGGCUUCGGACCAGGCUUCAUUCCCC
pyr-4400	CGGACCAGGCUUCAUUCCCC	zma-MIR166e	-41.20	0.90	DangsuA,DangsuB	GGGGAAUGUUGUCUGGCUCGAGGUGCAGAAACAUACAGAUCUCAUCGGUCUAGGUUCUUGUCGAUCUCGGACCAGGCUUCAUUCCCC
pyr-4400	CGGACCAGGCUUCAUUCCCC	zma-MIR166d	-40.40	0.84	DangsuA,DangsuB	GUGGAAUGUUGUCUGGUUCAAGGUCUUUUGCUUUGUGAUCCAUCUGUGUAGAGCUUCUAAGUAUUCCUUGGAUCUGCAAGAUCUCGGACCAGGCUUCAUUCCCC
pyr-444	ACUCUCCCUCAAGGGCUUCCG	mes-MIR477i	-62.40	1.11	DangsuA,DangsuB	AAGGCAUUUUGAUUGUUCACUCUCCCUCAAGGGCUUCCGGCAGUGCCAGACAUAUGCGUGAAUGGCGAGCUGGAGGUCCUCGGGGAGAGUGGACAAUAUUACUGUCU
pyr-912	UCCACAGGCUUUCUUGAACUG	osa-MIR396e	-72.00	0.76	DangsuA,DangsuB	GCGGGCAUGCUUUCCACAGGCUUUCUUGAACUGUGAACUCGUGGGGGUGUAUGUGCUCAUGUUGGGAUUGUGGUCGGUGGCCUCCAAUUCUCUGAAAAGAAAGCUGAAUUGUCGAGCUCCCCGUUCUGUCUUUGGUCGUCUCUACCUGUUGAUGGUUCAAGAAAGCCCAUGGAAACCAUGCCGC
pyr-912	UCCACAGGCUUUCUUGAACUG	bdi-MIR396b	-76.30	0.76	DangsuA,DangsuB	GGAGUAGUAAAAGAGAUGCGCGGGCAUGCUUUCCACAGGCUUUCUUGAACUGUGAACUCGUGGGGGUGUUCUCCUCUGAAUUGUGUCGUGGAAUUGCGGGCUUGUUCUUUAUCCGUCGAUCUCUCCGCCUGUUGAUGGUUCAAGAAAGCCCAUGGAAACCAUGCCGCCAUCUUGGUCUCGCGUCCCCGU
pyr-912	UCCACAGGCUUUCUUGAACUG	sbi-MIR396e	-85.90	0.84	DangsuA,DangsuB	UUUCCACAGGCUUUCUUGAACUGUGAACUCGUGGGGGUAGAAACCUUGCUGGGUUUGGUUCCCAUGUCGGAUGGAAUGCUUGGCUCCUCCCAGCGAUUCUUCCCCGGCCGUGAGUGAAUUGAAUUGCGGGGUUUCUCGCUUCGCUCGGCCGGCUCUACCUGUUGAUGGUUCAAGAAAGCCCAUGGAAAC
pyr-912	UCCACAGGCUUUCUUGAACUG	zma-MIR396d	-18.80	0.43	DangsuA,DangsuB	CGGGCAUGCUUUCCACAGGCUUUCUUGAACUGUGAACUCGUGGGCGUGGUGGUGGUGGUGCUGGUGCUGGGUGU
pyr-912	UCCACAGGCUUUCUUGAACUG	zma-MIR396c	-19.70	0.49	DangsuA,DangsuB	CGGGCAUGCUUUCCACAGGCUUUCUUGAACUGUGAACUCGUGGGUGGUGGUGGUAUGUCGGAUGGAAUGCUUGG
pyr-4538	GGAAUGUUGUCUGGCUCGGGG	bdi-MIR166b	-110.80	0.92	DangsuA,DangsuB	GCUAGAGAGGGAGCCUUUUUCGUUUUGAGGGGAAUGUUGUCUGGCUCGGGGUUCUCUUUAUUUCUAUGCCUCUCUCUAUCCCCCCCUCCUCAAUCUCUCUAGCUUUGAUUGGAUCGAGAGAAGAUCGAUCGAUCGAUCCAAGAAGAGUUCUGAGAAGGGGGAUGAAGAGAGUAGACGUAUGUGUGUAGAUCUCGGACCAGGCUUCAUUCCCCCCAAAUACAAGGGCUCCCAUGAUCUCUGCCUC
pyr-4538	GGAAUGUUGUCUGGCUCGGGG	ata-MIR166d	-76.10	0.81	DangsuA,DangsuB	CGUUUUGAGGGGAAUGUUGUCUGGCUCGGGGCUCUCUUUCUUUCUCUCUCUCUAUCCUCCUCCCCUCGACCCCUCCUUGAUCAGAUCGAGAGAAAGGUCGAAGAUCCGAUGAGGGGGGAGAAGAGAGUAGACGUGCGUAGAUCUCGGACCAGGCUUCAUUCCCCCCAAAGACAA
pyr-4538	GGAAUGUUGUCUGGCUCGGGG	sbi-MIR166h	-80.08	0.70	DangsuA,DangsuB	AGGGGAAUGUUGUCUGGCUCGGGGGCGCCGCCGCUCCGCUCCGCUCCUUCCUUCUCUGGUCUCUCUCUCUCCCCUAGUCUUCGCGCGCUUCCUCAAUCUCCAUCGUCUCUUCCUCCUUCUCUUGGAGACCAGCAGGAGGACGGAGGCGGGUGGUGUAGAUCUCGGACCAGGCUUCAUUCCCCCCA
pyr-4538	GGAAUGUUGUCUGGCUCGGGG	zma-MIR166a	-72.72	0.60	DangsuA,DangsuB	UGAGGGGAAUGUUGUCUGGCUCGGGGCCGCCGCCGCCGCUCCUUCCUUCUCUAGUCUCUCUUCUCUCCUAGCAGCUACUCUUCGCUUCCUACUCCUAUCUCGAUCCCUCUCUUCUUCUUCUUCUUCUUCUUCCUCUUCCCCCCUCUCUUGGAUCGAGACCGAGCGGACGGAGACGAGUGGUGUAGAUCUCGGACCAGGCUUCAUUCCCCCCAA
pyr-4538	GGAAUGUUGUCUGGCUCGGGG	osa-MIR166b	-87.10	0.98	DangsuA,DangsuB	GGGAGCCUUUUCAUUUUGAGGGGAAUGUUGUCUGGCUCGGGGCUACUUUUAAUUUCUCUCUCUUUUGAUAUCUUCUUUUCUCGAUCUCCUAGCUUGAUCUUUUGAUCUCUCAAAUCGAUCUUAAGAAAAAGAUCAGUCAAAGAGAUGAGAGUAGAUGUCUGUAGAUCUCGGACCAGGCUUCAUUCCCCCCAAACAGAAGGGCUCCC
pyr-4530	UUUGGACUGAAGGGAGCUCUA	aqc-MIR159	-18.30	0.59	DangsuA,DangsuB	GGAGUCUUUCCAGCCCAAAACAGCUUCUUGAUCUUCUUGAAAACUUCUGUUUGGACUGAAGGGAGCUCUAA
pyr-3812	GGAAUGUCGUCUGGUUCGAG	gma-MIR166i	-58.10	1.19	DangsuA,DangsuB	GUUGAGGGGAAUGUCGUCUGGUUCGAGACCAUUCAUGCAAGUAGUCUCAGACAUGACUCUUCUGAGUGAUUUCGGACCAGGCUUCAUUCCCCUCAGC
pyr-3812	GGAAUGUCGUCUGGUUCGAG	ppe-MIR166b	-54.80	1.17	DangsuA,DangsuB	AGUUGAGGGGAAUGUCGUCUGGUUCGAGAUCCUUCACAACCGUGGAGCUUAAGCAUAGUCUGAAUGAUUUCGGACCAGGCUUCAUUCCCCUCAACU
pyr-3812	GGAAUGUCGUCUGGUUCGAG	cpa-MIR166b	-41.50	1.06	DangsuA,DangsuB	GGAAUGUCGUCUGGUUCGAGAUCAUUCAUGUGAAGGUUCGAGAUCGUUUCUUGGAUGAUUUCGGACCAGGCUUCAUUCCCC
pyr-2568	AGAAUCUUGAUGAUGCUGC	ath-MIR172d	-48.70	1.11	DangsuA,DangsuB	AGUCAUUGUUUGCUAUUGCAACAUCUUCAAGAUUCAGAAAUCAGAUUCUCUUAUGGGUUUUCUUUUGAGCCUUUAUUUUUUGGUUUGAGAAUCUUGAUGAUGCUGCAGCGGCAAUUAAAUGGCU
pyr-2568	AGAAUCUUGAUGAUGCUGC	ath-MIR172c	-54.90	1.12	DangsuA,DangsuB	AGCUACUGUUCGCUGUUGGAGCAUCAUCAAGAUUCACAAAUCAUCAAGUAUUCGUGUAAAUAAACCCAUUUAUGAUUAGAUUUUUGAUGUAUGUAUGAGAAUCUUGAUGAUGCUGCAGCUGCAAUCAGUGGCU
pyr-2568	AGAAUCUUGAUGAUGCUGC	ath-MIR172b	-35.10	1.03	DangsuA,DangsuB	AGGCGCAGCACCAUUAAGAUUCACAUGGAAAUUGAUAAAUACCCUAAAUUAGGGUUUUGAUAUGUAUAUGAGAAUCUUGAUGAUGCUGCAUCAAC
pyr-2568	AGAAUCUUGAUGAUGCUGC	ath-MIR172a	-41.00	0.91	DangsuA,DangsuB	UGCUGUGGCAUCAUCAAGAUUCACAUCUGUUGAUGGACGGUGGUGAUUCACUCUCCACAAAGUUCUCUAUGAAAAUGAGAAUCUUGAUGAUGCUGCAUCGGC
pyr-2568	AGAAUCUUGAUGAUGCUGC	mes-MIR172d	-56.10	1.06	DangsuA,DangsuB	GCUGGUGCAGCAUCAUCAAGAUUCACAUGCAAAUGCAUUUCUUUGUCUUUCUCUCUCUCUUUCUCUCUGUCUAUCUAUUUUUUCUUGGUUUUGAAGGAUGAGAGUGAGAAUCUUGAUGAUGCUGCAUCGGC
pyr-2568	AGAAUCUUGAUGAUGCUGC	mes-MIR172b	-54.80	0.98	DangsuA,DangsuB	GCUGGUGCAGCAUCACCAAGAUUCACAUUUGCAAAUGCAGAGAAUGAGCUAGCUAGCUUCACUUUCUGCCCGACUCCUUCAUGUAUUGAGAGUGAGAAUCUUGAUGAUGCUGCAUCGGC
pyr-2568	AGAAUCUUGAUGAUGCUGC	mes-MIR172a	-63.10	0.77	DangsuA,DangsuB	CCAUUGAUCAGUCAGUAUUGGCGGAUGCGUCACCAUCAAGAUUCACAAAACUAUGAAGGCUUCAUCGGGACGGUGAGUGUACGGCCGGCGGCGGUGGCUCUUCUUACUUAAAAGGUUUCCUUUUUCGUAUGAGAAUCUUGAUGAUGCUGCAUCGGCAAAUAUCUGACUACAAUAUGG
pyr-2568	AGAAUCUUGAUGAUGCUGC	vun-MIR172	-60.40	1.01	DangsuA,DangsuB	UUCACAGUCGUUGUUUGCGGAUGUAGCAUCAUCAAGAUUCACAUGCAAACGAAGGUGGAUGGGACUGUGAUGCAAUCUAACCGCUCGUCUUUUUGAUGUGAGAAUCUUGAUGAUGCUGCAUCAGCCAUAAACGACUUUAA
pyr-2568	AGAAUCUUGAUGAUGCUGC	sly-MIR172a	-38.30	1.06	DangsuA,DangsuB	AUGUGGCAUAAUCAAGAUUCACGUGAAAAGUUGCAAAUUGGUUAUAUAAUUGAUGAAAUUAAUGGCUGGCUAUUUGAAACUCACGAGAAUCUUGAUGAUGCUGCAU
pyr-2568	AGAAUCUUGAUGAUGCUGC	sly-MIR172b	-47.60	1.29	DangsuA,DangsuB	AUGUAGCAUCAUCAAGAUUCAUACAUGAAAAUUAAGAGGCAAGGUUAAAUAUGUAGCUUUAAUUUGAAAUGAAAAAUAUAAUAUAUCAUGACCAUGUCUAUUUAUUUCAAAGUGAGAAUCUUGAUGAUGCUGCAU
pyr-2568	AGAAUCUUGAUGAUGCUGC	stu-MIR172e	-39.30	1.23	DangsuA,DangsuB	GCAACAUCAUCAAGAUUCACAUAAAAUAGAAAUAAUGUGGAGUAGAAAAAAAAAUAAAGUUGCUUCUAAAUUAUGUCUCCAUAUUAUUAUUUUUUUGAAAAUGAGAAUCUUGAUGAUGCUGCAU
pyr-2568	AGAAUCUUGAUGAUGCUGC	stu-MIR172a	-34.30	1.14	DangsuA,DangsuB	GUAGCAUAAUCAAGAUUCACAUGAAAAGUUGCAAAUUUGUUAUAUAAUUGAUGAAAUUAAUGGCUAGCUAUUUGAAAUUCAUGAGAAUCUUGAUGAUGCUGCAU
pyr-2568	AGAAUCUUGAUGAUGCUGC	stu-MIR172b	-30.10	0.97	DangsuA,DangsuB	GCAGCACCAUCAAGAUUCACAUAGAAAAUAUGGACUAUGAAAUGAAAUAUGCCCAAUUUUUGAAUACAUGAGAAUCUUGAUGAUGCUGCAU
pyr-2568	AGAAUCUUGAUGAUGCUGC	stu-MIR172c	-48.50	1.21	DangsuA,DangsuB	AGCAUCUUCAAGAUUCACAUAGAUUUAUAUAAUAUAUAGAGUUCCACGAUGGGGUGAAAGUGAUUAAUUAAUAUUAAUUAAUUAAUUUGCUCCUAUAUAUUGGCUCUAUUAAUUAUUUUUGAUGUGAGAAUCUUGAUGAUGCUGC
pyr-2568	AGAAUCUUGAUGAUGCUGC	ssl-MIR172	-46.60	1.19	DangsuA,DangsuB	GUGUAGCAUCAUCAAGAUUCACAUGCAAAAAAGCAUGCCAUAUAUAUGAGCUGAGCCCAGCUUUGGAUGGUGAGAAUCUUGAUGAUGCUGCAU
pyr-2568	AGAAUCUUGAUGAUGCUGC	cca-MIR172	-35.30	1.04	DangsuA,DangsuB	GGCGUGGCAUCAUCAAGAUUCACGUACAAAAUGCAAAAGCUUUUUGAGGAUGAGAAUCUUGAUGAUGCUGCAUCGGCAA
pyr-2568	AGAAUCUUGAUGAUGCUGC	lja-MIR172a	-61.20	1.15	DangsuA,DangsuB	GCUGGUGGAGCAUCAUCAAGAUUCACAAGCUUUAAGGGGUGGAUUGUGUUUGGGGUGGUCCCUAAUUGCUCCAUAUCAAUUUGCUCUUUGAUUUGAGAAUCUUGAUGAUGCUGCAGUAGC
pyr-2568	AGAAUCUUGAUGAUGCUGC	lja-MIR172c	-47.30	1.18	DangsuA,DangsuB	AGUCGUUGUCUGCAGGUGCAGCACCAUCAAGAUUCACACACAAAUUAUAAGUGUUUUGGUGUUGAGAAUCUUGAUGAUGCUGCAUCAGCAAUAAACGAUU
pyr-2568	AGAAUCUUGAUGAUGCUGC	lja-MIR172b	-56.80	1.11	DangsuA,DangsuB	GGUCGUUAUUUGCAGAUGUAGCAUCAUCAAGAUUCACAUGCAAAUGCAAAUGCAAUCUAAGGCCAAGCCAUAGAUCUUUUGAAGUGAGAAUCUUGAUGAUGCUGCAUCAGCCAUGAACGGCU
pyr-2568	AGAAUCUUGAUGAUGCUGC	ppe-MIR172b	-58.20	1.02	DangsuA,DangsuB	AGUCAUUGUUUGCGGGUGCAGCAUCACCAAGAUUCACAACUGAUCAAGGGCACAGUGACAUCAUGAUGUUAUGAUUUUAUUAUGACUAUGUGUCUCCUAAGUUUGAGAAUCUUGAUGAUGCUGCAUCAGCAAUAGACGACU
pyr-2568	AGAAUCUUGAUGAUGCUGC	ppe-MIR172a	-46.70	0.90	DangsuA,DangsuB	AGUCGUUGUUUGCGGGCGUAGCAUCAUCAAGAUUCACGCACAUGCAAUUAACUUGAAAGUUUCUCUCUUUGCCAAAGUUUCUUUCAAAGUGAGAAUCUUGAUGAUGCUGCAUCGGCAAUAAACCACU
pyr-2568	AGAAUCUUGAUGAUGCUGC	aqc-MIR172a	-42.40	0.72	DangsuA,DangsuB	GUUGGCUCUUUGGAGACGCAGCAUCAUCUAGUUCGCACAUGAUGAUGAUAGGCAGUGAUUAAGUCACUCACUUACGCAUGAUAGAAGUUGUGAUAUGAGAAUCUUGAUGAUGCUGCAUCAGCAGUUAGGCGACUA
pyr-2568	AGAAUCUUGAUGAUGCUGC	aly-MIR172f	-59.70	1.22	DangsuA,DangsuB	AGCUACUGUUCGCUGUUGGAGCAUCAUCAAGAUUCACAAAUCAUCAAGUAUUCGUGUAAAUGAACCCAUUUAUAAUUAUAUUGUUGAUGUAUGUAUGAGAAUCUUGAUGAUGCUGCAGCUGCAAUCAGUGGCU
pyr-2568	AGAAUCUUGAUGAUGCUGC	aly-MIR172d	-55.60	0.99	DangsuA,DangsuB	GAUUCAGAAUUUGAAGUUAGUGGCAGUCAUUGUUUGCUAUUGCAACAUCUUCAAGAUUCAGAAAUCAGAUUCUUUUAUGGGUUUUCUUUUGAGCCUAUAUUAUUUGGUUUGAGAAUCUUGAUGAUGCUGCAGCGGCAAUUAAAUGGCUUAUUUAUCUAGGGUU
pyr-2568	AGAAUCUUGAUGAUGCUGC	aly-MIR172b	-51.60	0.96	DangsuA,DangsuB	UAGCUCAUCUGUCGUUGUUUGUAGGUGCAGCACCAUCAAGAUUCACAUGAAAAUUGAUAAAUCUCCUAAAUUAGGGUUUUGAUAUGUAUAUGAGAAUCUUGAUGAUGCUGCAUCAACAAUCGACGGCUACAAAAUACCUAAAGCUG
pyr-2568	AGAAUCUUGAUGAUGCUGC	aly-MIR172c	-59.70	1.22	DangsuA,DangsuB	AGCUACUGUUCGCUGUUGGAGCAUCAUCAAGAUUCACAAAUCAUCAAGUAUUCGUGUAAAUGAACCCAUUUAUAAUUAUAUUGUUGAUGUAUGUAUGAGAAUCUUGAUGAUGCUGCAGCUGCAAUCAGUGGCU
pyr-2568	AGAAUCUUGAUGAUGCUGC	aly-MIR172a	-56.60	0.80	DangsuA,DangsuB	GGAGCCACGGUCGCUGUUUGCUGCUGUGGCAUCAUCAAGAUUCACAUCUGUUGAUGGACGGUGGUGAUUCGCUCUCCCCAAAGUUCUCUAUGAAAAUGAGAAUCUUGAUGAUGCUGCAUCGGCAAUCAACGGCUAUUCUUUUUCUCUCC
pyr-2568	AGAAUCUUGAUGAUGCUGC	mdm-MIR172f	-63.00	1.15	DangsuA,DangsuB	AGUCAUUGUUUGCGGGUGCAGCAUCAUCAAGAUUCACAAGUGAGUAGUGUGACAUGAUUUAAUCGAUUUAGUCAUGUCGAUUGAACUCGAGGAGUUGAGAAUCUUGAUGAUGCUGCAUCAGCAAUAGCUGACU
pyr-2568	AGAAUCUUGAUGAUGCUGC	mdm-MIR172g	-53.10	1.23	DangsuA,DangsuB	GUCGUUGUUUGCGGGUGUGGCAUCAUCAAGAUUCACACAUGCAAUUAACUGAUAAAGUUGUUUGAAAGUGAGAAUCUUGAUGAUGCUGCAUCGGCAAUAAACCAC
pyr-2568	AGAAUCUUGAUGAUGCUGC	nta-MIR172g	-43.80	0.93	DangsuA,DangsuB	ACUUGCAGCUGCAGCAUUAUCAAGAUUCACAUAGAAAUCAUGUGGGGCAGAAAACAUAGGUUCUAAAAAUCUAACCCCAAGUUCUUUGAACAUGAGAAUCUUGAUGAUGCUGCAUCAGCAAAUA
pyr-2568	AGAAUCUUGAUGAUGCUGC	mdm-MIR172e	-57.50	0.99	DangsuA,DangsuB	AGUCAUUGUUUGCGGGUGCCGCAUCACCAAGAUUCUUAAGUGAGUAGUGUGACAUGAUUUAAUUGAUUUAGUUAUGCCGAUCGGCUCACGGAGUUGAGAAUCUUGAUGAUGCUGCAUCAGCGAUGGAUGACU
pyr-2568	AGAAUCUUGAUGAUGCUGC	bol-MIR172a	-43.40	1.01	DangsuA,DangsuB	CGUUUUUUGUAGGCGCAGCACCAUCAAGAUUCACAUGGAAAUUGAAAAAUCUCCUAAUUUUUAAUUAGGGUUUUGAUAUGUAUAUGAGAAUCUUGAUGAUGCUGCAUCAACAACCGACG
pyr-2568	AGAAUCUUGAUGAUGCUGC	bol-MIR172b	-47.10	1.31	DangsuA,DangsuB	UGUAGGUGCAGCACCAUUAAGAUUCACAUGGAAAUUGAGAAAACCCUAAUUUAUAUUAAUUAGGGUUCUGAUAUGUAUAUGAGAAUCUUGAUGAUGCUGCAUCAACA
pyr-2568	AGAAUCUUGAUGAUGCUGC	mdm-MIR172b	-49.80	1.06	DangsuA,DangsuB	AGUCACUUUUUGCGGGUGGAGCAUCUUCAAGAUUCACAAUCUUAUUUGGGCUCCAAUUUUAGCCCCAUUUGAUGAUAUGAGAAUCUUGAUGAUGCUGCAGCGGCAAUAAAUGACU
pyr-2568	AGAAUCUUGAUGAUGCUGC	aau-MIR172	-59.00	0.88	DangsuA,DangsuB	GCAGAUGUAGCAUCAUCAAGAUUCACAUGCAAAUGCAACAAGUGGAAGUGAGAUUAUUUUUGAAUGAUAGAUGCAACCUUCUAAUCAAAAUCUCUCUCUCUCUCUCUCUCUCUGUGGCCACUUGGUUUCUUUCGGAACUGAGAAUCUUGAUGAUGCUGCAUCAGC
pyr-2568	AGAAUCUUGAUGAUGCUGC	csi-MIR172a	-62.00	0.90	DangsuA,DangsuB	GUCACCUUAAAACAGUCGUUGCUCGCUGUAGCAGCGUCCUCAAGAUUCACAUCCAGUCUAAAGGCAAAAGCAGCAAUUUUUCUUCAUUUUUGCUUGCCUUGGUUUUUGUCAGUGAGAAUCUUGAUGAUGCUGCAACGGCGAUUAAUGACUAGCUACCAACAA
pyr-2568	AGAAUCUUGAUGAUGCUGC	egu-MIR172c	-84.50	0.94	DangsuA,DangsuB	GUGCAGCAUCAUCAAGAUUCACAUCCUUCGCCCAUCUCUGCUUGUGCCCCCCAGGAGAAGGGUAUUUCAGGAUUUCUUAUAGAUUUUCUUAUGGGAGGAGUUUCUGCUGCUGUCUCGAAAACAGCAGCUGCUCCAAUUGAGCGGGUGAAGCUCUUAAUUCAGAACCAGGAUGAGAAUCUUGAUGAUGCUGCAU
pyr-2568	AGAAUCUUGAUGAUGCUGC	egu-MIR172b	-53.50	0.79	DangsuA,DangsuB	GUGCAGCAUCAUCAAGAUUCACAUCCUUUUCAGCUUCUGAUACCAAUAAACCCUUACAUGAUAACAAAGAUGUGCCUUCAGUGCUAGGCUUCUCAUUUUGGUUAUUACUAUUAUCGUAAUUGUCCCUGCAACCCUUGCUAUCCAACAGAUGAGAAUCUUGAUGAUGCUGCAU
pyr-2568	AGAAUCUUGAUGAUGCUGC	egu-MIR172a	-74.10	0.85	DangsuA,DangsuB	UGUGCAGCAUCAUCAAGAUUCACAUCUGUUAAUCACUGCCAAAUUCUGUUUAGUUAUUGAUCCUGAGCCUUCAACAUCUGCGUUGUCUCAGGAGGUGAAUGAAGGAAUGCAGGUGCGACAACAAGGCGUACGGUCUGGGAGAUAUGCCAAAGAAGUCUACAGGGACAAAGGAUGAGAAUCUUGAUGAUGCUGCAU
pyr-2568	AGAAUCUUGAUGAUGCUGC	osa-MIR172d	-55.30	0.91	DangsuA,DangsuB	AAACAGUCGGUGCUUGCAGGUGCAGCACCAUCAAGAUUCACAUCGAGUUCAUCCCUAAACGAGAUCGAGGUUGGCUGACUAUAUGUGAUGAGAAUCUUGAUGAUGCUGCAUCAGCAAACGCUCGACUACU
pyr-2568	AGAAUCUUGAUGAUGCUGC	vvi-MIR172d	-50.30	1.05	DangsuA,DangsuB	GUUAGCUGAUGCAGCAUCAUCAAGAUUCACACCCAAUGGAAGGGCAGUGAUGCAAUCUCUGCCAAAGAUUUUGAGAUGAGAAUCUUGAUGAUGCUGCAUUCGCAGUGAA
pyr-2568	AGAAUCUUGAUGAUGCUGC	osa-MIR172a	-48.90	0.98	DangsuA,DangsuB	GUGUUUGCGGGCGUGGCAUCAUCAAGAUUCACAUCCAUGCAUAUAUCACAAGACGCACAUAUACAUCCGAUUUGGCUGAGAAUCUUGAUGAUGCUGCAUCCGCAGACAA
pyr-2568	AGAAUCUUGAUGAUGCUGC	ptc-MIR172a	-53.80	1.08	DangsuA,DangsuB	UUGUUUGCAGGUGCAGCAUCAUCAAGAUUCACAUUCAAAUAGAUGUACCGAAGCUAUACAGCUAUGUAGCUAGCUAGCAAUGUAUAAUCAUUGUAGGUGAGAAUCUUGAUGAUGCUGCAUCAGCCAUAA
pyr-2568	AGAAUCUUGAUGAUGCUGC	ptc-MIR172c	-54.30	1.04	DangsuA,DangsuB	UUGUUUGCAGGUGCAGCAUCAUCAAGAUUCACAUUCAAACAGAUGUACGGCAGCUAGCUAGCUAGAUAGAUAGACAGCAAUGUAUUUCUUUGAAGGUGAGAAUCUUGAUGAUGCUGCAUCAGCCAUAA
pyr-2568	AGAAUCUUGAUGAUGCUGC	ptc-MIR172b	-54.90	0.95	DangsuA,DangsuB	UUGUUUGCGGGUGGAGCAUCAUCAAGAUUCACAUGCAAAUGCACGGCCGGUGAUGUUAAGAGUUAAAUCUUUCUUUGUUUCUGUUCAUCUGCCAAAGUUCUUUGGAAGUGAGAAUCUUGAUGAUGCUGCAUCGGCAAUAA
pyr-2568	AGAAUCUUGAUGAUGCUGC	ptc-MIR172f	-54.90	0.96	DangsuA,DangsuB	UUGUUUGCGGGUGCUGCAUCACCAAGAUUCACAUGCAAAUGCAUGGCCGAUGAUAUAUGUUAGAAAUUUUUUUUAUAUAAAAAAGAUAUCUUUCUUUCUUUCUGAUCAUCUGCCAAAGUUCUUUGGAAGUGAGAAUCUUGAUGAUGCUGCAUCGGCAAUAA
pyr-2568	AGAAUCUUGAUGAUGCUGC	dpr-MIR172a	-48.20	1.27	DangsuA,DangsuB	AGUCGUUUAUUAUCUGGUGUGGUAUCAUCAAGAUUCACAUGAAACCUAGUUGUUUCAAUGGUGAUGAUGAGAAUCUUGAUGAUGCUGCAUCGGAAAAAAAUGACU
pyr-2568	AGAAUCUUGAUGAUGCUGC	dpr-MIR172b	-37.50	1.10	DangsuA,DangsuB	UCUGGCGUGGCAUCAUCAAGAUUCACAUGAAGCUAAUUCUGAAGAUGAUCAUGAGAAUCUUGAUGAUGCUGCAUCGGC
pyr-2568	AGAAUCUUGAUGAUGCUGC	sbi-MIR172c	-49.30	0.95	DangsuA,DangsuB	GUGCAGCACCAUCAAGAUUCACAUGGUCCAACUCAUGCAUCUUCAGUGAUGCUCAUGUGAUGGCUCGCAGUUGCUAUAUAUGCAUAUGUGAUGAGAUGAGAAUCUUGAUGAUGCUGCAU
pyr-2568	AGAAUCUUGAUGAUGCUGC	sbi-MIR172a	-47.40	1.18	DangsuA,DangsuB	GUGCAGCAUCAUCAAGAUUCACAUCCAGCUCAUCCUCGGUGAUAUGCUAUAUACAUAAAUAUAUGCGUAUGUGAUGAGAUGAGAAUCUUGAUGAUGCUGCAU
pyr-2568	AGAAUCUUGAUGAUGCUGC	sbi-MIR172d	-36.00	0.97	DangsuA,DangsuB	UGGCAUCAUCAAGAUUCACAACCCAUGGAUCCAAAUAAACCACUGAUUUGGAUCGAGGAGAUGCAUGAGAAUCUUGAUGAUGCUGCAU
pyr-2568	AGAAUCUUGAUGAUGCUGC	zma-MIR172b	-53.50	1.03	DangsuA,DangsuB	GUGCAGCACCAUCAAGAUUCACAUCGUCCAACUCAUGCAUCAUGCAUAUAUGCAUCUUCAAUGAUGCGUGCCUCGCAUGUGUGUGUAUAUAUAUAUGAUGAGAUGAGAAUCUUGAUGAUGCUGCAU
pyr-2568	AGAAUCUUGAUGAUGCUGC	zma-MIR172c	-52.90	0.93	DangsuA,DangsuB	GUGCAGCACCACCAAGAUUCACAUCCAACUCUCACGCAUCUUCAGUGAUGCAUGCAUGCUCUGUGAUGUCUCGCAGCAGCUAUAUGCAUAUGUGAUGAGAUGAGAAUCUUGAUGAUGCUGCAU
pyr-2568	AGAAUCUUGAUGAUGCUGC	zma-MIR172d	-34.00	0.97	DangsuA,DangsuB	GUGCAGCACCAUCAAGAUUCACAUCCCCAGCUCGAUCUGUGCAUGAUGAGAUGAGAAUCUUGAUGAUGCUGCAU
pyr-2568	AGAAUCUUGAUGAUGCUGC	bna-MIR172a	-40.20	1.09	DangsuA,DangsuB	UUUUGUAGGCGCAGCACCAUCAAGAUUCACAUGGAAAUUGAAAAAUCUCCUAAUUUUUAAUUAGGGUUUUGAUAUGUAUAUGAGAAUCUUGAUGAUGCUGCAUCAACAAC
pyr-2568	AGAAUCUUGAUGAUGCUGC	bna-MIR172d	-49.10	1.12	DangsuA,DangsuB	UUUUUGCUAUUGCAUCAUCAUCAAGAUUCAGAAAUCAUAUUCCUUGAUGGGUUCUCCUUCGAGCCUGUCUUUUUUGGUUUGAGAAUCUUGAUGAUGCUGCAGCGGCGAUUAAA
pyr-2568	AGAAUCUUGAUGAUGCUGC	lus-MIR172b	-53.20	1.13	DangsuA,DangsuB	AGUCAUUGGUCGCAGGUGCAGCAUUAUCAAGAUUCACAUGCAUUAUAUACAUAGAAUUAAAUUAAAUUAACUUUAAACCUACUACUAUGCUAUGGUAGUGAGAAUCUUGAUGAUGCUGCAUCAGCGGUAUAUGACU
pyr-2568	AGAAUCUUGAUGAUGCUGC	lus-MIR172c	-69.50	1.09	DangsuA,DangsuB	AGUCAAUAUCGGCAGAUGCGGCAUCUUCAAGAUUCACAAACUUAUCCAAGCCCUCCCAUGACCGAACCGAAUCGGUCGUCGGUUGGGUUAGGUUUUAUUGAGAAUCUUGAUGAUGCUGCAUCGGCAGAUAUAUUGGCU
pyr-2568	AGAAUCUUGAUGAUGCUGC	lus-MIR172a	-46.70	1.14	DangsuA,DangsuB	AGUCGUUGUUUGCUGGCGUAGCAUCAUCAAGAUUCACAUUCCGAACUGGGAUCAUGAGAAUCUUGAUGAUGCUGCAUUGGCCAUAUACGACU
pyr-2568	AGAAUCUUGAUGAUGCUGC	lus-MIR172f	-54.30	1.02	DangsuA,DangsuB	GCGUGAGUCGUUGUUUGCUGGCGUGGCAUCAUCAAGAUUCACAUGCAAAGCUUCAUUUUGAGAAAUGGACUGUUGAGAAUCUUGAUGAUGCUGCAUCGGCAAUCGAGGACUACAUAC
pyr-2568	AGAAUCUUGAUGAUGCUGC	lus-MIR172d	-60.90	0.83	DangsuA,DangsuB	GCGAGCGUGAGUCGUUGUUUGCUGGCGUGGCAUCAUCAAGAUUCACAUGUAAAGCUAGUAGCUAAUACUACCCCGGCCAGUAGUAGGACAUGGACUGAUGAGAAUCUUGAUGAUGCUGCAUCGGCAGUCGACGACUGCAUACGAAAAGU
pyr-2568	AGAAUCUUGAUGAUGCUGC	mtr-MIR172d	-52.30	1.11	DangsuA,DangsuB	AGUCAGUGUUUGCUAGUGGAGCAUCAUCAAGAUUCACAAGCUUUAUAGGGCUUCAAAUCAAUUAGCCCUUCUUCAUGUUAUGAGAAUCUUGAUGAUGCUGCAGCAGCAAUUGAUGACU
pyr-2568	AGAAUCUUGAUGAUGCUGC	lus-MIR172h	-94.70	0.99	DangsuA,DangsuB	AUGGAAACCAACAGUCAUUGGUCGCAGGUGCAGCAUCAUCAAGAUUCACAUGCAUUAUAUACAGAGAGUUAAAUCGAAUUUAAACCUACUGACUACCACAAAAGCAAGGCAUAGUUACAUAACAUCUGGAAAAGAGGCUGUGUCUUGUGUUUUGUCUUUGAGUAGGUUUGAAUCGUGAUUCUAUUACGGUGGCUAGUGAGAAUCUUGAUGAUGCUGCAUCAGCGGUAUAUGACUUAAUUAGCUUCAU
pyr-2568	AGAAUCUUGAUGAUGCUGC	mtr-MIR172c	-54.90	1.10	DangsuA,DangsuB	UAUUUGCAGAUGUAGCAUCAUCAAGAUUCACAUAUGAAAGUGCAAAUGGUUUUGUUGGAUUUUGAUCUGAUCGAUGCAAAUCUAAGUUCUCCAUAGGUCUUUUGAACUGAGAAUCUUGAUGAUGCUGCAUCAGCCAUAA
pyr-2568	AGAAUCUUGAUGAUGCUGC	mtr-MIR172b	-44.90	1.15	DangsuA,DangsuB	UGUUUGCAGAUGUAGCAUCAUCAAGAUUCAUAUGUGAAUGAUGCAGAGUGGAACUGCUAAUAUUUCAAUUGAUCUUUUGAAAUAAGAAUCUUGAUGAUGCUGCAUCAGCCAUAU
pyr-2568	AGAAUCUUGAUGAUGCUGC	ata-MIR172b	-48.50	0.92	DangsuA,DangsuB	UCUUGCAGGUGCAGCACCACCAAGAUUCACAUCGGAUCCGUCGUAAAAUCAAAUUUAUGCGACGCGCCAGGUGAUGAGAAUCUUGAUGAUGCUGCAUCAGCAGGCAC
pyr-2568	AGAAUCUUGAUGAUGCUGC	ata-MIR172a	-65.80	0.93	DangsuA,DangsuB	GUUUGCGGGCGCGGCACCAUCAAGAUUCACAUCCAUCCCAUCCAGGCAUCCUUCGGUUCGUUUCCAAAACGAAACGAUCGACAACGCGUUGGAUACAAUAUAGAUGUGCAUGAGAAUCUUGAUGAUGCUGCGUCCGCACACAA
pyr-2568	AGAAUCUUGAUGAUGCUGC	gma-MIR172j	-44.40	0.97	DangsuA,DangsuB	GCAGGUGCAGCAGCAUCAAGAUUCACACACAGAUUCCACCUCCUUGGGGGAGUGUUUAGGUGCUGAGAAUCUUGAUGAUGCUGCAUCAGC
pyr-2568	AGAAUCUUGAUGAUGCUGC	gma-MIR172h	-43.50	0.93	DangsuA,DangsuB	GCAGGUGCAGCAGCAUCAAGAUUCACACACAGAUUUACCUCCUUGGGGGCGUGUGUUUCGGUGCUGAGAAUCUUGAUGAUGCUGCAUCAGC
pyr-2568	AGAAUCUUGAUGAUGCUGC	bra-MIR172c	-58.20	1.00	DangsuA,DangsuB	UUCAGACUUUGAAGCAGUUGCAGUCAUUUUUUGCUAUUGCAUCAUCAUCAAGAUUCAGAAAUCAUAUUCCUUGAUGGGUUCUCCUUCGAGCCUGUCUUUUUUGGUUUGAGAAUCUUGAUGAUGCUGCAGCGGCGAUUAAAUGGCUUUUUUAU
pyr-2568	AGAAUCUUGAUGAUGCUGC	bra-MIR172b	-47.10	1.31	DangsuA,DangsuB	UGUAGGUGCAGCACCAUUAAGAUUCACAUGGAAAUUGAGAAAACCCUAAUUUAUAUUAAUUAGGGUUCUGAUAUGUAUAUGAGAAUCUUGAUGAUGCUGCAUCAACA
pyr-2568	AGAAUCUUGAUGAUGCUGC	bra-MIR172a	-43.40	1.01	DangsuA,DangsuB	CGUUUUUUGUAGGCGCAGCACCAUCAAGAUUCACAUGGAAAUUGAAAAAUCUCCUAAUUUUUAAUUAGGGUUUUGAUAUGUAUAUGAGAAUCUUGAUGAUGCUGCAUCAACAACCGACG
pyr-2568	AGAAUCUUGAUGAUGCUGC	bdi-MIR172a	-64.20	0.83	DangsuA,DangsuB	AGGCGGCACGCACAGUCGGCGCUUGCAGGUGCAGCACCACCAAGAUUCACAUCGGGUUCUCCAGUCGUAAUUAAUUAACGAGGAGUACAACCAUGAUGAGAAUCUUGAUGAUGCUGCAUCGGCAACCGCUCGACUACUCAUCAUAUCGUCAAU
pyr-2568	AGAAUCUUGAUGAUGCUGC	gma-MIR172b	-65.50	0.98	DangsuA,DangsuB	UUGACAGUCGUUGUUUGCGGAUGUAGCAUCAUCAAGAUUCACAUGCAAAUGAAGGUGGGUGGGACUAUGAUGCAAUCCAAGUGCUCUGCCAAUCCAUCGGUCUUUUUGAUGUGAGAAUCUUGAUGAUGCUGCAUCAGCCAUAAACGGCUUUAA
pyr-2568	AGAAUCUUGAUGAUGCUGC	gma-MIR172a	-65.00	0.88	DangsuA,DangsuB	UUAACAGUCGUUAUUUGCGGAUGUAGCAUCAUCAAGAUUCACAUGCAAGCGCAGGUGGUGGGUGGGACUUGAUGCAAUCUAAGUGCUGUGCCAGCCAAGCCAUAGGUCUUUUGGAACUGAGAAUCUUGAUGAUGCUGCAUCAGCCAUAAACGACUUCAC
pyr-2568	AGAAUCUUGAUGAUGCUGC	gma-MIR172g	-45.60	1.01	DangsuA,DangsuB	GCAGGUGCAGCACCAUCAAGAUUCACAUGCAAUUUACACCCUAUAAGAGAUUUUUGACAAAAUUUCUUUCCUAGGAGAGUUUUGACUUGAGAAUCUUGAUGAUGCUGCAUCAGC
pyr-2568	AGAAUCUUGAUGAUGCUGC	gma-MIR172f	-60.20	0.94	DangsuA,DangsuB	GCGGAUGUAGCAUCAUCAAGAUUCACAUGCAAACGCAGGUGGUGGGUGGGACUGUGAUGCAAUCUAAGUGCUACUGUGCCAACCAAAGCCAUAGGUCUUUUGGAAGUGAGAAUCUUGAUGAUGCUGCAUCAGC
pyr-2568	AGAAUCUUGAUGAUGCUGC	tcc-MIR172b	-64.80	0.97	DangsuA,DangsuB	AUCAGUCGUUUUUUGCUGCUGCAGCAUUAUCAAGAUUCAUAUGCAAAUAUAGUACGGCAGCCGUGGUCCCGGUACCGCGAUUGUUUUUUUUCAGAUGCCAUAGCUUUUAUUUGAGCAUGAGAAUCUUGAUGAUGCUGCAUCGGCCAUAAAUGACUUCACA
pyr-2568	AGAAUCUUGAUGAUGCUGC	tcc-MIR172e	-65.50	0.83	DangsuA,DangsuB	UUGACAGUCGUUGUUUGCGGGUGUAGCAUCAUCAAGAUUCACAUGCAAAUGCACGGUGGUGGUGAUGGAUAAUACAAACUCUCUUCUUUUUUUCUCCCCUUCCCCUUUCUUUUCCCUUCUCCUUUAUGCCAAAGUUGUUUGGAAAGUGAGAAUCUUGAUGAUGCUGCAUCGGCAAUAAACGACUAUACA
pyr-2568	AGAAUCUUGAUGAUGCUGC	cme-MIR172c	-36.30	0.96	DangsuA,DangsuB	GCGGGUGUAGCAUCUUCAAGAUUCACAACAUAUGCAAAUAUUAUCGAAAUAAAAAUAAUAUGAUGCUCAAAAAUCUCAACUUGAGAAUCUUGAUGAUGCUGCAUCAGCAAUCAA
pyr-2568	AGAAUCUUGAUGAUGCUGC	cme-MIR172b	-48.10	1.15	DangsuA,DangsuB	GCUGGUGUAGCAUUAUCAAGAUUCACAUUCAAAUGUGUUGGGGCUACAUUAUUCCUGCACAUUUCUUUGCAACUGAGAAUCUUGAUGAUGCUGCAUCGGCAAUUAA
pyr-2568	AGAAUCUUGAUGAUGCUGC	cme-MIR172e	-34.80	0.97	DangsuA,DangsuB	GCUAUUGCUGCAUCUUCAAGAUUCACAAGUUUUUUUUUUCUUGUUUGCCCUAAACCCCCUUGAGAAUCUUGAUGAUGCUGCAGUGGCAAUUA
pyr-2568	AGAAUCUUGAUGAUGCUGC	mdm-MIR172n	-49.00	1.07	DangsuA,DangsuB	GGUCACUUUUUGCGGGUGGAGCAUCAUCAAGAUUCACAAUCUUACUUGGGUUCUAGUUUUAACCCCAUUUGAUGAUAUGAGAAUCUUGAUGAUGCUGCAGCAGCAAUAAAUGACU
pyr-2568	AGAAUCUUGAUGAUGCUGC	mdm-MIR172o	-49.80	1.06	DangsuA,DangsuB	AGUCACUUUUUGCGGGUGGAGCAUCUUCAAGAUUCACAAUCUUAUUUGGGCUCCAAUUUUAGCCCCAUUUGAUGAUAUGAGAAUCUUGAUGAUGCUGCAGCGGCAAUAAAUGACU
pyr-2568	AGAAUCUUGAUGAUGCUGC	nta-MIR172i	-47.70	1.16	DangsuA,DangsuB	GUUUGCAGAUGUAGCAUCAUCAAGAUUCACAUAUUAUAAAGGCAUGAUGAUUAACGACCAUGGCCUUUUUGGAGGUGAGAAUCUUGAUGAUGCUGCAUUAGCAAUAAAC
pyr-2568	AGAAUCUUGAUGAUGCUGC	nta-MIR172h	-50.20	1.14	DangsuA,DangsuB	GUUUGCGGGUGUAGCAUCAUCAAGAUUCACAUGAAAAGGCAAGGUGAAAUGAAAUUAAUUAAGAGCCAUGGCUUUUUGAAGGUGAGAAUCUUGAUGAUGCUGCAUCAGCAAUAA
pyr-2568	AGAAUCUUGAUGAUGCUGC	mdm-MIR172h	-53.10	1.23	DangsuA,DangsuB	GUCGUUGUUUGCGGGUGUGGCAUCAUCAAGAUUCACACAUGCAAUUAACUGAUAAAGUUGUUUGAAAGUGAGAAUCUUGAUGAUGCUGCAUCGGCAAUAAACCAC
pyr-2568	AGAAUCUUGAUGAUGCUGC	nta-MIR172e	-126.30	0.93	DangsuA,DangsuB	GUUUGCAGAUGUAGCAUCAUCAAGAUUCACAUAAAAAACGCAUGGUGAUGAGCUGAUGAAAUGACAUUAAUGGCCAAGGCAGCUUUCUGAAGGUGAGAAUCUUGAUGAUGCUGCAUCAGCAAUAAACGACUACCUGAUUUAUCAUUAUGCCAUUGGAACGAUACACAGAUAAUUAGCAUAAUUCAUGUGCAAGAAUGCCACGGGUACAUGGUAUGGUUCAAUUGAUACAGUCGUUGUUUGCGGGUGUAGCAUCAUCAAGAUUCACAUGAAAAGGCAAGGUGAAAUGAAAUUAAUUAAGAGCCAUGGCUUUUUGAAGGUGAGAAUCUUGAUGAUGCUGCAUCAGCAAUAA
pyr-2568	AGAAUCUUGAUGAUGCUGC	nta-MIR172d	-47.60	0.95	DangsuA,DangsuB	GUUUGCAGAUGUAGCAUCAUCAAGAUUCACAUAAAAAACGCAUGGUGAUGAGCUGAUGAAAUGACAUUAAUGGCCAAGGCAGCUUUCUGAAGGUGAGAAUCUUGAUGAUGCUGCAUCAGCAAUAAA
pyr-2568	AGAAUCUUGAUGAUGCUGC	mdm-MIR172d	-63.00	1.15	DangsuA,DangsuB	AGUCAUUGUUUGCGGGUGCAGCAUCAUCAAGAUUCACAAGUGAGUAGUGUGACAUGAUUUAAUCGAUUUAGUCAUGUCGAUUGAACUCGAGGAGUUGAGAAUCUUGAUGAUGCUGCAUCAGCAAUAGCUGACU
pyr-2568	AGAAUCUUGAUGAUGCUGC	nta-MIR172f	-67.60	0.89	DangsuA,DangsuB	UCUGAAGGUGAGAAUCUUGAUGAUGCUGCAUCAGCAAUAAACGACUACCUGAUUUAUCAUUAUGCCAUUGGAACGAUACACAGAUAAUUAGCAUAAUUCAUGUGCAAGAAUGCCACGGGUACAUGGUAUGGUUCAAUUGAUACAGUCGUUGUUUGCGGGUGUAGCAUCAUCAAGAUUCACAUGAAAAGGC
pyr-2568	AGAAUCUUGAUGAUGCUGC	nta-MIR172a	-51.80	1.10	DangsuA,DangsuB	UUUUGCAGAUGCAGCAUCUUCAAGAUUCACAUAUAGUAUAUUUUAUGGAGUUCAAUUGUGGGAGAAAAAAAUUAAAUUUUCUUGCUCCCUAUGGCUCCUUAAUUUAAUAUGAGAAUCUUGAUGAUGCUGCAGCAGCAAUGAA
pyr-2568	AGAAUCUUGAUGAUGCUGC	mdm-MIR172c	-49.00	1.07	DangsuA,DangsuB	GGUCACUUUUUGCGGGUGGAGCAUCAUCAAGAUUCACAAUCUUACUUGGGUUCUAGUUUUAACCCCAUUUGAUGAUAUGAGAAUCUUGAUGAUGCUGCAGCAGCAAUAAAUGACU
pyr-2568	AGAAUCUUGAUGAUGCUGC	nta-MIR172c	-51.70	1.10	DangsuA,DangsuB	GUUUGCGGAUGUAGCAUCAUCAAGAUUCACAUGCAAAACGCAUGGUGAUGAAAUGAUAUUAAUGGCCAUGGCAGCUUUUUGAAGGUGAGAAUCUUGAUGAUGCUGCAUCAGCAAUAA
pyr-2568	AGAAUCUUGAUGAUGCUGC	gra-MIR172b	-59.70	1.33	DangsuA,DangsuB	GUUUGCUGCUGCAGCAUUAUCAAGAUUCACAAGAGGCGUUUUAGGGUCUUUUUUGAUUGAUUGAUCAAUCAAUAAGCCCUUUUAUGAUUGAGAAUCUUGAUGAUGCUGCAGUGGCAAUA
pyr-3772	AAGCCAAGGAUGAAUUGCCGG	cme-MIR169g	-44.20	0.92	DangsuA,DangsuB	AGGACUACUAAGCCAAGGAUGAAUUGCCGGCAAUGCAUCAAUAUAUAUUUGAUCUUAGUUUAUGAUAUAAUAAUGUAUAGACAACUUCUUCUUCUUUGUAGCCGGCAAUUCCAUUCUUGGCUAAGUGUGGCUU
pyr-3772	AAGCCAAGGAUGAAUUGCCGG	vvi-MIR169v	-42.70	0.93	DangsuA,DangsuB	AGGGAGGAACAAAGCCAAGGAUGAAUUGCCGGCGAUGAAAGUAGGCAGCUUUGUCCAUGGAUCGGCAAUUUAUUUCUUGGCUAUGUUGGGCUCUCU
pyr-2709	UGAGCCGAACCAAUAUCACCC	vvi-MIR171g	-21.00	0.49	DangsuA,DangsuB	GCCAGCCUCUCCAUGUUGGUUCCAUCGGUGGGGGACACCAACUCCUUGAGCCGAACCAAUAUCACCCGAGCCAAAU
pyr-2709	UGAGCCGAACCAAUAUCACCC	bdi-MIR171f	-44.50	1.01	DangsuA,DangsuB	ACGACAUGGCAUGGUAUUGUUUCGGCUCAUGUCCUUCUCGAGCUGAUGGUCGGAUGAGAUGUGAGCCGAACCAAUAUCACCCAUGUAUUCU
pyr-2496	UGGAGGCAGCGGUUCAUCGAUC	ptc-MIR162a	-44.20	0.87	DangsuA,DangsuB	UGGGAAGACACUGGAGGCAGCGGUUCAUCGAUCUCUUCCUGGCCAAUUUUUUGUUUAGCACGAAAAACAUGAACCGAUCGAUAAACCUCUGCAUCCAGCGCUUCCUU
pyr-2496	UGGAGGCAGCGGUUCAUCGAUC	ptc-MIR162b	-42.20	0.88	DangsuA,DangsuB	UGAGAAGACACUGGAGGCAGCGGUUCAUCGAUCUUUUCCUGAAGAUUUUUUUGUUUUACACGAACAACACGAACCGAUCGAUAAACCUCUGCAUCCAGUGCUUCCCU
pyr-2496	UGGAGGCAGCGGUUCAUCGAUC	aly-MIR162b	-58.90	0.88	DangsuA,DangsuB	UUUUUUUAGUUCUCUCCUCAUUUUUAUGUUUGGAUUUAGAGUGAAGUCGCUGGAGGCAGCGGUUCAUCGAUCAAUUCCUGUGAAUAUUUUUGUUUUCAAAAGCAUGAAUCGAUCGAUAAACCUCUGCAUCCAGCGCUUACUCUUCCUCAUCUGUUUAAUAAUCUAUUUGAGAAUGCUCAAAAGA
pyr-2496	UGGAGGCAGCGGUUCAUCGAUC	aly-MIR162a	-69.00	0.82	DangsuA,DangsuB	GAUUCGGGAAAUUUUAUGUUUCUUUGCCAUUUUUUUUGGAGUUUAGUUGGAAAAAGAGUGAGAGUCGCUGGAGGCAGCGGUUCAUCGAUCUCUUCCUGGGAACGAAUAUAUAAAUAUUGAAAAAGCAUGAAUAGAUCGAUAAACCUCUGCAUCCAGCGUUUGCCUCUUUAUCUUUGUUAUUGGCUUCAAUUUUUUUGGUUUUUGAAAAAAGUGAGGGAAAACAGAGUC
pyr-2496	UGGAGGCAGCGGUUCAUCGAUC	aau-MIR162	-40.90	0.71	DangsuA,DangsuB	GGGGGUGUAAGUCACUGGAGGCAGCGGUUCAUCGAUCUCUUCCUGAAUUUUGUUGUGUGAAAAGCGCAAAGCAUGAAUCGGUCGAUAAACCUCUGCAUCCAGCGCUCACUUUGCC
pyr-2496	UGGAGGCAGCGGUUCAUCGAUC	rco-MIR162	-36.20	0.82	DangsuA,DangsuB	UCACUGGAGGCAGCGGUUCAUCGAUCUCUUCCUGGAAGAUUUUGUUGUGAAACAAAAAUAAAACGCAUGAAUCGAUCGAUAAACCUCUGCAUCCAGCGCUU
pyr-2496	UGGAGGCAGCGGUUCAUCGAUC	csi-MIR162	-62.90	0.90	DangsuA,DangsuB	AAACUGUUUACACUGAUCUGUGCUGCUGAUAAAUCUUAAUUUUUUUUUUUGAAUUUUUAUUUAACAGAAAAUAGAGAGAGUGAAGUCACUGGAGGCAGCGGUUCAUCGAUCACUUUGUGCAAAUUUUGUUGUGAAAAAUAACACAAAAUACAUGAAUCGAUCGAUAAACCUCUGCAUCCAGCGCUCACUCCAACUCUAUUC
pyr-2496	UGGAGGCAGCGGUUCAUCGAUC	ppe-MIR162	-46.30	0.73	DangsuA,DangsuB	GGAAUAAUUCUUUUGGUGGGGUGGAGUCACUGGAGGCAGCGGUUCAUCGAUCUCUUCCUGAGAUUUGUUGUGAAAAUACAAAACAUGAAUCGGUCGAUAAACCUCUGCAUCCAGCGCUCACUCUCUCAUUCUUGUGUUUUUCU
pyr-2496	UGGAGGCAGCGGUUCAUCGAUC	cpa-MIR162a	-43.20	0.83	DangsuA,DangsuB	AGGGUAAAGUCACUGGAGGCAGCGGUUCAUCGAUCUCUUCCUGGGAAUUUGGUGUGAAAAAUCACAGAACAUGAAUCGAUCGAUAAACCUCUGCAUCCAGCGUUACCCC
pyr-2496	UGGAGGCAGCGGUUCAUCGAUC	ghr-MIR162a	-46.00	0.77	DangsuA,DangsuB	UUUUUAGCGUUGGGGUAAAGACACUGGAGGCAGCGGUUCAUCGAUCUCUUCCUGAGAAUUUUGUUGUGAGAAUAACACAAAUACAUGAAUCGAUCGAUAAACCUCUGCAUCCAGCGCCUUAACUCUCCAUGAAGUUUUAUGUUAGUUA
pyr-2496	UGGAGGCAGCGGUUCAUCGAUC	nta-MIR162a	-38.10	0.76	DangsuA,DangsuB	UUAAGAACACUGGAGGCAGCGGUUCAUCGAUCUGUUCCCUGAAAGGCGAUAAACAAAAUAUAGCAACAGGAAUCGGUCGAUAAACCUCUGCAUCCAGCGCUUAACCC
pyr-2496	UGGAGGCAGCGGUUCAUCGAUC	nta-MIR162b	-44.50	0.86	DangsuA,DangsuB	UUGAGGACACUGGAGGCAGCGGUUCAUCGAUCUGUUCCCUGAACGCAACAGCGCUGGGAAUCGGUCGAUAAACCUCUGCAUCCAGCGCUUAAACC
pyr-2496	UGGAGGCAGCGGUUCAUCGAUC	gma-MIR162b	-43.10	0.81	DangsuA,DangsuB	UGAGGUGAAGUCACUGGAGGCAGCGGUUCAUCGAUCUCUUCCUGAAUUUGGUUGUGGAAGAACACAAAGCAAGAAUCGGUCGAUAAACCUCUGCAUCCAGCGCUCACUUU
pyr-2496	UGGAGGCAGCGGUUCAUCGAUC	gma-MIR162c	-47.70	0.81	DangsuA,DangsuB	GAGAUGAGGUGAAGUCACUGGAGGCAGCGGUUCAUCGAUCUCUUCCUGAAUUUGGUUGUGGAAGAACACAAAGCAAGAAUCGGUCGAUAAACCUCUGCAUCCAGCGCUCACUUUGCCUC
pyr-2496	UGGAGGCAGCGGUUCAUCGAUC	mdm-MIR162b	-42.80	0.97	DangsuA,DangsuB	GCACUGGAGGCAGCGGUUCAUCGAUCUGUUUAUGAGAUUUUGUUGUGAGUAAACACAGUUCAUGAAUCGGUCGAUAAACCUCUGCAUCCAGCGC
pyr-2496	UGGAGGCAGCGGUUCAUCGAUC	tcc-MIR162	-40.80	0.74	DangsuA,DangsuB	AGGAAAAAGGGUUAAAGACACUGGAGGCAGCGGUUCAUCGAUCUCUUCCUGGGAAUUUUGUUGUGAGAAUAACACAAAUACAUGAUUCGAUCGAUAAACCUCUGCAUCCAGAGCCUUACCUCUCUCUUUAA
pyr-2496	UGGAGGCAGCGGUUCAUCGAUC	vun-MIR162	-48.90	0.81	DangsuA,DangsuB	AGAUGAGGUGAAGUCACUGGAGGCAGCGGUUCAUCGAUCUCUUCCUGAAUUUGGCUGUGGAAGAACACAAAGCAAGAAUCGGUCGAUAAACCUCUGCAUCCAGCGCUCACUUUGCCUCUCU
pyr-2496	UGGAGGCAGCGGUUCAUCGAUC	ath-MIR162b	-47.60	0.97	DangsuA,DangsuB	GAGUGAAGUCGCUGGAGGCAGCGGUUCAUCGAUCAAUUCCUGUGAAUAUUUAUUUUUGUUUACAAAAGCAAGAAUCGAUCGAUAAACCUCUGCAUCCAGCGCUGCUUGCUC
pyr-2496	UGGAGGCAGCGGUUCAUCGAUC	ath-MIR162a	-54.20	0.93	DangsuA,DangsuB	UAGUUGGAAGAAGAGUGAGAGUCGCUGGAGGCAGCGGUUCAUCGAUCUCUUCCUGUGAACACAUUAAAAAUGUAAAAGCAUGAAUAGAUCGAUAAACCUCUGCAUCCAGCGUUUGCCUCUUGUAUCUUUCUUAUUGACUU
pyr-2496	UGGAGGCAGCGGUUCAUCGAUC	lus-MIR162b	-63.50	0.77	DangsuA,DangsuB	GUGUCUGAAGGGUUGUGAAGAGGGAGGGAACACACGGAGUUUGGAGGCAGCGGUUCAUCGAUCUCUUCAUGGUUUAUGUGGGUUCAUCCGAUCACAAAAACACGUGAAUCGAUCGAUAAACCUCUGCAUCCAGCAACCCCCCUAGUUUCUCCCUUCCUACCUUCUCAU
pyr-2496	UGGAGGCAGCGGUUCAUCGAUC	lus-MIR162a	-64.50	0.73	DangsuA,DangsuB	GAAGGGUUGUGAUGAUUGAUGAGAGAGGGAACACACGGAGUUUGGAGGCAGCGGUUCAUCGAUCUCUUCAUGGUUUCUGUGGGUUCCUCACACAAAAACACGUGAAUCGAUCGAUAAACCUCUGCAUCCAGCAACCCCCUAGUUCCUCCCUCCCUCCCCAUGAAUCUGUAGCUUC
pyr-2496	UGGAGGCAGCGGUUCAUCGAUC	bra-MIR162	-50.90	0.93	DangsuA,DangsuB	UGAAAGUUGAAGUCGCUGGAGGCAGCGGUUCAUCGAUCAAUUCCUGUGAAAAAUGAUGUUGGAAACAAUUUACAUGGGAAGCAUGAAUCGAUCGAUAAACCUCUGCAUCCAGUGCUUCUCCUUCCU
pyr-2496	UGGAGGCAGCGGUUCAUCGAUC	mes-MIR162	-34.20	0.81	DangsuA,DangsuB	CUGGAGGCAGCGGUUCAUCGAUCUCUUCCUGGAGGAUUUUGUUGUGGAAUUAACACAAACACAUGAAUCGAUCGAUAAACCUCUGCAUCCAG
pyr-2496	UGGAGGCAGCGGUUCAUCGAUC	mdm-MIR162a	-42.20	0.98	DangsuA,DangsuB	GCACUGGAGGCAGCGGUUCAUCGAUCUGUUUAUGAGAUUUGUUGUGAAAAAACACAGAACAUGAAUCGGUCGAUAAACCUCUGCAUCCAGCGC
pyr-2492	UUGACAGAAGAUAGAGAGC	aly-MIR157c	-78.20	0.68	DangsuA,DangsuB	CAUACUUUAUGAUGUUGCAUAUAUCACACAUACGUUUGAGAGUGAUGCUGGUUGUUGACAGAAGAUAGAGAGCACUAAGGAUGACAUGCAAGCACAUACAUAUAUCAUCACACCCCAUGUGGAUGAUAAAAUAUGUAUAACAAAUUCAAGAAAGAGAGAGAGAGAGAGAUCAGAUGUAGAGGGAGAGGGAGAGAAAGAGACUGCAUCUCUACUCUUUUGUGCUCUCUAUACUUCUGUCACCACCUUUAUUUCUUCUUCUCUCUCACCUACAUAUACGCACAGUCACAUCUAUG
pyr-2492	UUGACAGAAGAUAGAGAGC	aly-MIR157b	-45.40	1.11	DangsuA,DangsuB	GUGUUGACAGAAGAUAGAGAGCACAGAUGAGAAGAUACAAUUCUUCGCAGCUUCUUUGCAUCUUACUCCUUUGUGCUCUCUAAGCUUCUGUCAUCAC
pyr-2492	UUGACAGAAGAUAGAGAGC	aly-MIR157a	-54.10	1.08	DangsuA,DangsuB	GAGGCAUUGAGAGUGUUGACAGAAGAUAGAGAGCACAGAUGAUAAGAUACAAUUCGGAGCAGUUUCUUUGCAUCUUACUCCUUUGUGCUCUCUAGCCUUCUGUCAUCACCUUUUAUUUGCUUU
pyr-2492	UUGACAGAAGAUAGAGAGC	vvi-MIR156i	-48.10	1.00	DangsuA,DangsuB	GGUGACGUUGUUGACAGAAGAUAGAGAGCACAGAUGAUGAAAUGCAAGGAGCCAGCAUCUCACUCCUUUGUGCUCUCUAUUCUUCUGUCAUCACCUUAAGGCC
pyr-2492	UUGACAGAAGAUAGAGAGC	bna-MIR156c	-53.40	0.91	DangsuA,DangsuB	GGGAGUGAUGCAGGUUGUUGACAGAAGAUAGAGAGCACUAAGGAUGACAUGCAAGUACAAGGAUAUAAGGAAAUUCAAGAAAGAGAGGAAAAAAGAGCCUGCAUCUUUACUCUUUUGUGCUCUCUAUACUUCUGUCAAUACCAUUAUUUAUUCCU
pyr-2492	UUGACAGAAGAUAGAGAGC	bna-MIR156b	-72.60	0.89	DangsuA,DangsuB	UAGGUUUGAGAGUGAUGCUGGUUGUUGACAGAAGAUAGAGAGCACUAAGGAUGACAUGCAAGUACAUAUGUAUGUAUCAUCACACCGCCUGUGGAUGAUUACAAAAAUAAAACCAAUUCAAAAGAGAGAGAGAGAGAGCCUGCAUGUCUACUCUUUCGUGCUCUCUAUACUUCUGUCACCACCAUUAUUUCUUCUUCUUUCUUACCUA
pyr-2492	UUGACAGAAGAUAGAGAGC	mes-MIR156i	-46.80	1.34	DangsuA,DangsuB	UUGACAGAAGAUAGAGAGCACAGAUGAUGAUGUGCAAUUAAUGGAACUCAGCAUCUCACUCAUUUGUGCUCUCUAUGCUUCUGUCA
pyr-2492	UUGACAGAAGAUAGAGAGC	mes-MIR156h	-43.80	1.25	DangsuA,DangsuB	UUGACAGAAGAUAGAGAGCACAGAUGAUGAUAUGCAAUAAUGGACUCUGCAUCUCACUCCUUUGUGCUCUCUAUGCUUCUGUCAU
pyr-2492	UUGACAGAAGAUAGAGAGC	mes-MIR156j	-44.50	1.35	DangsuA,DangsuB	UUGACAGAAGAUAGAGAGCACAGAUGAUGAUGAAAUGCAUAAAGUUUGCAUCUCACUCCUUUGUGCUCUCUACUCUUCUGUCAU
pyr-2492	UUGACAGAAGAUAGAGAGC	bna-MIR156g	-52.10	1.04	DangsuA,DangsuB	CGUUGAUAGUGUUGACAGAAGAUAGAGAGCACAGAUGAUGAGAUGCAAUUUGGAGCAGCUUGUAUGCAUCGUACUCCUUUGUGCUCUCUAGUCUUCUGUCAUCACUCGUUACUUG
pyr-2492	UUGACAGAAGAUAGAGAGC	bra-MIR157a	-66.80	1.08	DangsuA,DangsuB	GUGAUGCUGGUUGUUGACAGAAGAUAGAGAGCACUAAGGAUGACAUGCAAGUACAUAUGUAUGUAUCAUCACACCGCCUGUGGAUGAUUACAAAAAUAGCCUGCAUGUCUACUCUUUCGUGCUCUCUAUACUUCUGUCACCACCAUUAU
pyr-2492	UUGACAGAAGAUAGAGAGC	sly-MIR156c	-40.30	1.26	DangsuA,DangsuB	UUGACAGAAGAUAGAGAGCACGAAUAACGAGGUGCUAAUUGGAACAUGCACCUUAAUUCUUUGUGCUCUCAUUCUUUUGUCAU
pyr-2492	UUGACAGAAGAUAGAGAGC	stu-MIR156b	-43.50	1.36	DangsuA,DangsuB	UUGACAGAAGAUAGAGAGCACAAAUGAUUAAGUGCAUGAAAAUUGUAUGCACCUUACUCCUUUGUGCUCUUUAUUCUUCUGUCACCA
pyr-2492	UUGACAGAAGAUAGAGAGC	stu-MIR156c	-36.90	1.19	DangsuA,DangsuB	UUGACAGAAGAUAGAGAGCACGAAUAAUGGAAGCUGCAUGCACCUUAAUUCUUUGUGCUCUCUAUUCUUCUGUCAUCA
pyr-2492	UUGACAGAAGAUAGAGAGC	stu-MIR156a	-41.50	1.22	DangsuA,DangsuB	UUGACAGAAGAUAGAGAGCACAGAUGAUAAAGUGCAUGGAAAUUGUCUGCACCUUACUCCUUUGUGCUCUUUAUUCUUCUGUCAUCA
pyr-2492	UUGACAGAAGAUAGAGAGC	stu-MIR156d	-42.40	1.25	DangsuA,DangsuB	UUGACAGAAGAUAGAGAGCACUAAUGAUGAUAUGCUAAUUUCAUUCAGCAAAAGCAUCUCACUUCAUUUGUGCUCUCUAUGCUUCUGUCAUCA
pyr-2492	UUGACAGAAGAUAGAGAGC	ahy-MIR156b	-57.30	1.15	DangsuA,DangsuB	GGAGGCACUAUUGGUAGAGUUGUUGACAGAAGAUAGAGAGCACAAAAGAUGAUAUGCAUAUAGAUAUAUAUAGUCUGCAUUUUAUUCCUUUGUGCUCUCUAAGCUUCUGUCAUCACUCUUCAGCCUCUAUUUCUA
pyr-2492	UUGACAGAAGAUAGAGAGC	bgy-MIR156	-44.00	1.19	DangsuA,DangsuB	UGUUUGACAGAAGAUAGAGAGCACAGAUGAUGAUGUGCAAUUUUUGGAUUCUGCAUCUCACUCCUUUGUGCUCUCUAUGCUUCUGUCAUCA
pyr-2492	UUGACAGAAGAUAGAGAGC	nta-MIR156j	-43.60	0.95	DangsuA,DangsuB	UGACAAUUGUUGACAGAAGAUAGAGAGCACUAAUGAUGAUAUGCUAAGUAAAUGUAGGGGCAAAAGCAUCUCAAUUCAUUUGUGCUCUCUAUGCUUCUGUCAUCACCUUCGGCCA
pyr-2492	UUGACAGAAGAUAGAGAGC	vvi-MIR156f	-44.40	0.94	DangsuA,DangsuB	UUAUGUUCUGUUGACAGAAGAUAGAGAGCACAACUGAACAUACCCAAGAGGGCUUGUGUUUGAGCAGUCUUGUCCUCUCUCUUCUCCUGUCAACAGAACUUGCUG
pyr-2492	UUGACAGAAGAUAGAGAGC	mtr-MIR156f	-48.70	1.28	DangsuA,DangsuB	GUUUGUUGACAGAAGAUAGAGAGCACAUCUGAACAAACACAAAAGACAUUGUGUUUGAACAGUUGUGUGCUCUCUGCUCUUCUGCCAACAUACU
pyr-2492	UUGACAGAAGAUAGAGAGC	gma-MIR156e	-52.30	0.89	DangsuA,DangsuB	AGGAGGUGUUGGUGAUGCUGUUGACAGAAGAUAGAGAGCACUGAUGAUGAAAUGCAUGAAAGGGAAUGGCAUCUCACUCCUUUGUGCUCUCUAGUCUUCUGUCAUCAUCCUUCUCCCUCCCCUC
pyr-2492	UUGACAGAAGAUAGAGAGC	gma-MIR156d	-51.57	0.92	DangsuA,DangsuB	CUACUUGGUAAUUAAGGUUGUUGACAGAAGAUAGAGAGCACAGAUGAUGAUAUGCAUAUUAUAUAAUAUAUAGCAGGGAACUCAUGAUGAAUUGUGCAUCUUACUCCUUUGUGCUCUCUAUACUUCUGUCAUCACCUUCAGCCUCCAUUUC
pyr-2492	UUGACAGAAGAUAGAGAGC	gma-MIR156g	-54.70	1.22	DangsuA,DangsuB	UGAACAAUAUCUUGAACAGUUUGUUGACAGAAGAUAGAGAGCACAGGUGAUCAUACCCAAAAAAGCUUUUGUGUGUGAGCAGUUUUGUGCUCUCUAUCUUCUGUCAAUGUACUUCUCA
pyr-2492	UUGACAGAAGAUAGAGAGC	atr-MIR156c	-63.50	0.79	DangsuA,DangsuB	GAUGAGCAGGGGAGAUGAGCUUGAAAGUAGAGUUGGUUGUUGACAGAAGAUAGAGAGCACAAAACCAACACAAGCAAUAGGCUUUCAUGCUUCUGGAGGAUAUGUGCUCUCUAUACUUCUGCCACCAUGCCCUUAGAAGCACUCUAUUUCUAUUCCCUCUCUUCCCUUCCCUCUC
pyr-2492	UUGACAGAAGAUAGAGAGC	gma-MIR156c	-45.20	0.54	DangsuA,DangsuB	ACUUGACCACUAGGCUUAUCUCUUUCCGUUUCUGAGCAUGCAUACUCAUUCACAGCAUCAAAAUGCACAGAUCCUGAUGGAGAUUGCACAGGGCAGGUGAUGCUAGAUUGCACCAUACUCAACUCUGGACUUUGUGAUUGAAGUGUUGACAGAAGAUAGAGAGCACAACCUGAGUCAAAGGAUCC
pyr-2492	UUGACAGAAGAUAGAGAGC	cpa-MIR156e	-43.00	1.13	DangsuA,DangsuB	UUGACAGAAGAUAGAGAGCACAGAUGAUGAAAUGCAAAUUAGAAGGACCAAACAGUGCAUCUCACUCCUUUGUGCUCUCUAUUCUUCUGUCAUCA
pyr-2492	UUGACAGAAGAUAGAGAGC	gma-MIR156m	-49.30	1.01	DangsuA,DangsuB	AGGGUUGUUGACAGAAGAUAGAGAGCACAGAUAGUGAUAUGCAUAAAAAUAUGGAACGGGAAAGCAAUUGCAUCUCACUCCUUUGUGCUCUCUAGGCUUCUGUCAUCCACACCUU
pyr-2492	UUGACAGAAGAUAGAGAGC	cpa-MIR156f	-44.20	1.08	DangsuA,DangsuB	UUGACAGAAGAUAGAGAGCACAGAUGAUGAUAUGCAAUUCAUUAAUGGAUCAGAUCAACUCUCUGCAUCUCACUCCUUUGUGCUCUCUAUGCUUCUGUCAUCA
pyr-2492	UUGACAGAAGAUAGAGAGC	rco-MIR156f	-43.30	1.31	DangsuA,DangsuB	UUUUGUUGACAGAAGAUAGAGAGCACAACUUAACAUACCCAACGACAGAUUUGUGUAUGUGAAGUUUUGUGCUCUUUUUUCUUCUGUCAACUUAUAU
pyr-2492	UUGACAGAAGAUAGAGAGC	ptc-MIR156j	-46.40	1.05	DangsuA,DangsuB	GGUGAUGUUGUUGACAGAAGAUAGAGAGCACAGAUGAUGAUAUGCAAUGGACUCUGCAUCCCACUCCUUUGUGCUCUCUAUGCUUCUGUCAUCACUUUCA
pyr-2492	UUGACAGAAGAUAGAGAGC	gma-MIR156i	-52.44	1.03	DangsuA,DangsuB	UUAAGGUUGUUGACAGAAGAUAGAGAGCACAGAUGAUGAUAUGCAUAUUAUAUAAAAAGCAGCUAGGGAACUCAUGAAUUGUGCAUCUCACUCCUUUGUGCUCUCUAUACUUCUGUCAUCACCCUUCAGC
pyr-2492	UUGACAGAAGAUAGAGAGC	gma-MIR156j	-41.90	1.02	DangsuA,DangsuB	GGUGAUGCUGUUGACAGAAGAUAGAGAGCACAGAUGAUGAAAUGCAAGAAAGGAAAUGGCAUCUUACUCUUUUGUGCUCUCUAGUCUUCUUGUCAUCAUCAUU
pyr-2492	UUGACAGAAGAUAGAGAGC	mdm-MIR156ab	-82.20	0.96	DangsuA,DangsuB	AGGAGUGGGGAACUGGGAGAGAGAAAGAGCAGGGAGUGAUGAUACAUUGUUGACAGAAGAUAGAGAGCACAGAUGGAUGACUUGCAAUUGACUAUGCAUCUCACUCCUUUGUGCUCUCUAUGCUUCUGUCAUCACCUCGUUAUAUCUAGCUUCCUUGCCUCUCUCCACACCCGUGCACCU
pyr-2492	UUGACAGAAGAUAGAGAGC	mdm-MIR156ac	-98.30	0.90	DangsuA,DangsuB	CAAUCUCUAAUCAUAUUAUAGUAUUAAAUUUAGGGUAAGGACUAGGGAACUGGGAGAGAGAAAGAGCAGGGAGUGGUGAUACGUUGUUGACAGAAGAUAGAGAGCACAGAUGGAUGACUUGCAAUGGACUAUGCAUCUCACUCCUUUGUGCUCUCUAUGCUUCUGUCAUCACCUAGCUAUAUCCAGCUUCCCUGCCCCUCCCCCACACCCCUGCACCUCCCAUAUUAAUCUAAUUCAUAAAAUGAUUAUUUGAUUG
pyr-2492	UUGACAGAAGAUAGAGAGC	nta-MIR156i	-46.80	1.09	DangsuA,DangsuB	UGAUAAUUGUUGACAGAAGAUAGAGAGCACUGAUGAUGAUAUGCUAAUUAAAUUUGUGCAGCAAAAGCAUCUCAAUUCAUUUGUGCUCUCUAUGCUUCUGUCAUCACCUUCAGCCA
pyr-2492	UUGACAGAAGAUAGAGAGC	nta-MIR156h	-46.50	0.95	DangsuA,DangsuB	GGAGAUGCUGUUGACAGAAGAUAGAGAGCACAGAUGAUGAUAAGAUGCUAAUUGGAAGCUUUCUGCACCUUAAUCCUUUGUGCUCUCUAGUCUUCUGUCAUCAUCCUCAGCC
pyr-2492	UUGACAGAAGAUAGAGAGC	atr-MIR156a	-80.40	1.01	DangsuA,DangsuB	AGGGUUUAUAUGUGAGGGAGUAAGUAAUAGAGAGAGGGGGUCUGGUGUUGUUGACAGAAGAUAGAGAGCACAUAAAGUAACGUGCAGUGGGCGUUUGCAUUUUAUUUUGUAUGUGCUCUCUAGCCUUCUGUCAUCACCUGCUCACCAUUCCCACCCAUCUUACUUCUCCAACAUAUUUCUAAUCCU
pyr-2492	UUGACAGAAGAUAGAGAGC	nta-MIR156g	-49.80	0.82	DangsuA,DangsuB	GUGAGAUUGUUGACAGAAGAUAGAGAGCACAGAUGAUGAUCAUGCUGCUAAAUCUGGGAUUGGAGAGGGCACUGAAUCAAUUAAACUGCAAAAAAAAAAAGCAUCUCAAUUCAUUUGUGCUCUCUAUGCUUCCGUCAUCACCUUCACCG
pyr-2492	UUGACAGAAGAUAGAGAGC	vvi-MIR156g	-49.00	1.00	DangsuA,DangsuB	GGUGAUGUUGUUGACAGAAGAUAGAGAGCACAGAUGAUGAUGUGCAUGGAGUUUGCAUCUCACUCCUUUGUGCUCUCUAGACUUCUGUCAUCACCUCAGCCCC
pyr-2492	UUGACAGAAGAUAGAGAGC	ath-MIR157b	-55.40	0.94	DangsuA,DangsuB	UGGGAGGCAUUGAUAGUGUUGACAGAAGAUAGAGAGCACAGAUGAUAAGAUACAAUUCCUCGCAGCUUCUUUGCAUCUUACUCCUUUGUGCUCUCUAGCCUUCUGUCAUCACCCGUUAUUUGCCAUCACCCA
pyr-2492	UUGACAGAAGAUAGAGAGC	han-MIR156c	-44.70	1.18	DangsuA,DangsuB	AUGUUGACAGAAGAUAGAGAGCACAGAGAAGCAUGAAUUGCACAUAGAUAUUGCAAUUCACUCCUUCGUGCUCUCUAUGCUUCUGUCAUUACC
pyr-2492	UUGACAGAAGAUAGAGAGC	mtr-MIR156h	-42.40	1.06	DangsuA,DangsuB	UGCUGUUGACAGAAGAUAGAGAGCACAGAUGAUGAAAUGCAUGGAAGGCAAUGGCAUCUCAUUCCUUUGUGCUCUUUAUUCUUCUGUCAUCACC
pyr-2492	UUGACAGAAGAUAGAGAGC	gma-MIR156l	-45.90	0.90	DangsuA,DangsuB	GGUAAGGUUGUUGACAGAAGAUAGAGAGCACAGAUGAUGAUAUGCACAUAUACAUGGAACAGGAAUUUAAGCAAUUGCAUCUCACUCCUUUGUGCUCUCUAAGCUUCUGUCAUCCACCUCC
pyr-2492	UUGACAGAAGAUAGAGAGC	vun-MIR156b	-56.20	1.00	DangsuA,DangsuB	AGGAGGUGUUGGUGAUGCUGUUGACAGAAGAUAGAGAGCACAGAUGAUGAAAUGCAUGAAAGGAAAUUGCAUCUCGCUCCUUUGUGCUCUCUAUUCUUCUGUCAUCACCCUUUUGUACCUUCCCUC
pyr-2492	UUGACAGAAGAUAGAGAGC	cca-MIR156c	-47.70	1.19	DangsuA,DangsuB	GGAUGUUGACAGAAGAUAGAGAGCACUGAGAGGACAUGAAGUGCAUAUAUAUAAUGCACCUCGCUUCUUUGUGCUCUUUAUACUUCUGUCAUUACCCU
pyr-2492	UUGACAGAAGAUAGAGAGC	ath-MIR157c	-75.30	0.91	DangsuA,DangsuB	AGGUUUGAGAGUGAUGUUGGUUGUUGACAGAAGAUAGAGAGCACUAAGGAUGACAUGCAAGUACAUACAUAUAUAUCAUCACACCGCAUGUGGAUGAUAAAAUAUGUAUAACAAAUUCAAAGAAAGAGAGGGAGAGAAAGAGAGAGAACCUGCAUCUCUACUCUUUUGUGCUCUCUAUACUUCUGUCACCACCUUUAUCUCUUCUUCUCUCUAACCU
pyr-2492	UUGACAGAAGAUAGAGAGC	mtr-MIR156e	-81.30	1.56	DangsuA,DangsuB	GGUUGUUGACAGAAGAUAGAGAGCACAGAUGAUGAUAUGCAUUUAUAUAUAUAUAUAUAUAUAUAUAUAUAUAUAUAUAUAUAUAUAUAUAUAUAUAUGAGGAGCUGGAGCUGCAUGGAGAUGAAUUUUGUGCAUAUCACUCCUUUGUGCUCUCUAUGCUUCUGUCAUCACC
pyr-2492	UUGACAGAAGAUAGAGAGC	ath-MIR157a	-46.00	1.07	DangsuA,DangsuB	GUGUUGACAGAAGAUAGAGAGCACAGAUGAUGAGAUACAAUUCGGAGCAUGUUCUUUGCAUCUUACUCCUUUGUGCUCUCUAGCCUUCUGUCAUCACC
pyr-2492	UUGACAGAAGAUAGAGAGC	gra-MIR157b	-44.30	1.05	DangsuA,DangsuB	GUUGUUGACAGAAGAUAGAGAGCACAGAUGAUGGUGUUGCCUAUGUGCAUGCAUCCCACUCCUUUGUGCUCUCUAUGCUUCUGUCAUCAUC
pyr-2492	UUGACAGAAGAUAGAGAGC	gra-MIR157a	-44.40	0.99	DangsuA,DangsuB	GUUGUUGACAGAAGAUAGAGAGCACAGAUGAUGGUGUGCAAUUAGGAGUCUUGAAGCAAUGCAUCCCACUCCUUUGUGCUCUUUAUGCUUCUGUCAUCACC
pyr-2492	UUGACAGAAGAUAGAGAGC	rco-MIR156g	-43.90	1.00	DangsuA,DangsuB	UGUUGUUGACAGAAGAUAGAGAGCACUGACGAUGAAAUGCAUGAUGGGACUCUGCAUCUCACUCCUUUGUGCUCUCUAGUCUUCUGUCAUCAUCACC
pyr-2492	UUGACAGAAGAUAGAGAGC	lus-MIR156h	-38.40	1.20	DangsuA,DangsuB	UUGACAGAAGAUAGAGAGCACAGAUGAUGAGAUACUAAUGAAAGAAUCUCACUUUCCUUUGUGCUCCCUAUGCUUCUGUCAU
pyr-2492	UUGACAGAAGAUAGAGAGC	lus-MIR156i	-68.10	1.05	DangsuA,DangsuB	AUAUGAAGGAAAGAGGUGGAUUUGGAUAUAUUGGUUGUUGACAGAAGAUAGAGAGCACAGAUGAUCUGGGAUGUCUCGAACCAUAUAUAUAUAUAUCUGCAUCUCCAUCCUUUGUGCUCUCUAGUCUUCUGUCAUCACCUUCAUCCAUCCUAGCUUUCUUUUGUGU
pyr-2492	UUGACAGAAGAUAGAGAGC	ptc-MIR156i	-40.80	0.93	DangsuA,DangsuB	UGUGAUGUUGUUGACAGAAGAUAGAGAGCACAGAUGAUGUUUUGCAGUAGACUCUGGAUCUCACUCCUUUGUGCUCUCUAUGCUUCUGCCAUCACCUUC
pyr-2492	UUGACAGAAGAUAGAGAGC	ptc-MIR156h	-45.90	1.00	DangsuA,DangsuB	GGUGAUGCUGUUGACAGAAGAUAGAGAGCACUGACGAUGAAAUGCAUGGAGCUUAAUUGCAUCUCACUCCUUUGUGCUCUCUAGUCUUCUGUCAUCACCUUCA
pyr-2492	UUGACAGAAGAUAGAGAGC	ptc-MIR156g	-49.70	1.13	DangsuA,DangsuB	GGUGAUGUUGUUGACAGAAGAUAGAGAGCACAGAUGAUGAAAUGCAUGGAGCUUAAUUGCAUCUCACUCCUUUGUGCUCUCUAGUCUUCUGUCAUCACCUUCA
pyr-2492	UUGACAGAAGAUAGAGAGC	lus-MIR156e	-50.60	0.99	DangsuA,DangsuB	GGAAGGAUAAGGAUUGUUGUUGUUGACAGAAGAUAGAGAGCACAGAUGAUGAAAUACUGUAGUGAAAGUAUCUCACUUUCCUUUGUGCUCCCUAUGCUUCUGUCAUCACAUGCACCUUCCUUUC
pyr-2492	UUGACAGAAGAUAGAGAGC	lus-MIR156f	-60.50	0.95	DangsuA,DangsuB	GGGUUGAGAGCUCUUUUGGGGGAUGUUGUUGACAGAAGAUAGAGAGCACAGAUGAUGGGAUACAAUUGAUAGUAUACAUAUCUCACUUCCUUUGUGCUCUCUAUGCUUCUGUCAUCAUCUUUUCGAGCGGCCUCCUCGAUCC
pyr-2492	UUGACAGAAGAUAGAGAGC	hbr-MIR156	-58.10	1.06	DangsuA,DangsuB	GGGCACUGGUGGUGAUGUUGUUGACAGAAGAUAGAGAGCACAGAUGAUGAUAUGCAAUUAAUGGACUCUGCAUCUCACUCCUUUGUGCUCUCUAUGCUUCUGUCAUCACCUUCAGCCCU
pyr-2492	UUGACAGAAGAUAGAGAGC	lus-MIR156b	-76.60	1.05	DangsuA,DangsuB	UUAGAGGAGAUGAAGGUUUUGGGUUGAGAGCCCUUUUGGGAUAUGUUGUUGACAGAAGAUAGAGAGCACAGAAGAUGAUGGGAUACAAUUGAUAGUAUCUCACUUCCUUUGUGCUCUCUAUGUUUCUGUCAUCACCUGUUCGGGCCUCUUCCAUCCUUCCUCUUUUUCGA
pyr-2492	UUGACAGAAGAUAGAGAGC	lus-MIR156c	-46.80	1.09	DangsuA,DangsuB	GGUUUGUUGACAGAAGAUAGAGAGCACAGAUGAUUUUGGGAUGUCGUCAAACCCCACAUCGCCAUCAUUUGUGCUCUCUAUGUUUCUGUCAUCACUUUC
pyr-2492	UUGACAGAAGAUAGAGAGC	tcc-MIR156f	-52.60	0.97	DangsuA,DangsuB	UACGGAUGAGGACGCUUUUGUUGACAGAAGAUAGAGAGCACAACUGAACAUACCCAGAAAAGGCCUGUGUAUGAGCAGCCUUGUGCUCUCUUUUCUUCUGUCAAUGGAAUUUUCUGUCAGAGUU
pyr-2492	UUGACAGAAGAUAGAGAGC	tcc-MIR156e	-59.70	1.09	DangsuA,DangsuB	AGGAGGAACUGGUGAUGUUGUUGACAGAAGAUAGAGAGCACAGAUGAUGAGAUGCAUGGAGCCUGCAUUUCACUCCUUUGUGCUCUCUAUUCUUCUGUCAUCACCUUUCAUCCCCUCACUUAA
pyr-2492	UUGACAGAAGAUAGAGAGC	bol-MIR157a	-42.70	1.04	DangsuA,DangsuB	GGUUGUUGACAGAAGAUAGAGAGCACUAAGGAUGACAUGCAAGUACAAGGAUAUAAGGAAAUUCGCAUCUUUACUCUUUUGUGCUCUCUAUACUUCUGUCAAUACC
pyr-2492	UUGACAGAAGAUAGAGAGC	ppe-MIR156g	-46.30	1.40	DangsuA,DangsuB	UUGACAGAAGAUAGAGAGCACAGAUGGAUGAUUUGCAAUCAAUAUGCAUCUCACUCCUUUGUGCUCUCUAUGCUUCUGUCAU
pyr-2492	UUGACAGAAGAUAGAGAGC	cme-MIR156b	-53.50	0.94	DangsuA,DangsuB	UAUAUGUUGUUGACAGAAGAUAGAGAGCACAGAUGAUGAUAUGCAAAAAUUUCAUCAAUCAUUAUUAUUAAUAUCAUUCUUUGUUUUUUAGGGUUUAGAACUUUAGAGAGAGACAUUAUUAUCCUUAUCACUAUGCAUUUCACUCCAUUUGUGCUCUCUAUGCUUCUGUCAUCACUCUCUUC
pyr-2492	UUGACAGAAGAUAGAGAGC	ppe-MIR156i	-46.30	0.99	DangsuA,DangsuB	AUGUUGUGGUUGACAGAAGAUAGAGAGCACAAAUGAACAUAUACACCCAGUCACCCAGACCCAGGAAAAUGAUUGUGUAUGAUCAGUUUUGUGCUCUCUUUUCUUCUGCCAACAUAUUAUAU
pyr-2492	UUGACAGAAGAUAGAGAGC	ppe-MIR156h	-48.50	0.97	DangsuA,DangsuB	AGGUUUUGUUGACAGAAGAUAGAGAGCACAGAUGAAGAAAUGCAUGGACAUCGACAUGGCAGGCAGCAUCUCUCUCCUUUGUGCUCUCUAUGCUUCUGUCAUCACACCU
pyr-2492	UUGACAGAAGAUAGAGAGC	sly-MIR156a	-43.20	1.20	DangsuA,DangsuB	UUGACAGAAGAUAGAGAGCACUAAUGAUGAUAUGCUAAUUUCAUUCAAUUUGGGCAGCAAAAGCAUCUCAAUUCAUUUGUGCUCUCUAUGCUUCUGUCAU
pyr-2492	UUGACAGAAGAUAGAGAGC	sly-MIR156b	-38.80	1.18	DangsuA,DangsuB	UUGACAGAAGAUAGAGAGCACGAAUAAUGAGGUGCUAAUUGGAAGCUGCACCUUAAUUCCUUGUGAUCUCUAUACUUCUGUCAU
pyr-2492	UUGACAGAAGAUAGAGAGC	bcy-MIR156	-44.00	1.19	DangsuA,DangsuB	UGUUUGACAGAAGAUAGAGAGCACAGAUGAUGAUGUGCAAUUUUUGGAUUCUGCAUCUCACUCCUUUGUGCUCUCUAUGCUUCUGUCAUCA
pyr-2492	UUGACAGAAGAUAGAGAGC	rco-MIR156h	-45.50	1.11	DangsuA,DangsuB	UGUUGUUGACAGAAGAUAGAGAGCACAGAUGAUGAUGUGCAAUGACUUUUUCUGCAUCUCACUCCUUUGUGCUCUCUAUGCUUCUGUCAUCACCUUC
pyr-4319	UAGCCAGGGAUGACUUGCCUA	tcc-MIR169g	-58.10	0.89	DangsuA,DangsuB	GAUAAAGAGUCUUUGUUUGGUAGCCAGGGAUGACUUGCCUACGGCUUUUCAGGUGGUUAAUAUUGAUGCUAUGAUUAUGAAUGUAAAACCCCUGGCUCUGGUCUGCAGGCAGUCACCUUGGCUAUGCUAACAGGCUCUUUUCUC
pyr-2639	UGAAGUGUUUGGGGGAACUC	vvi-MIR395i	-40.10	0.89	DangsuA,DangsuB	GCCCCCUAGAGUUCCCCUGACCACUUCACUGGGGAUCUUCUGUAAUGACUUCCUACUGAAGUGUUUGGGGGAACUCCUGGUGUCAU
pyr-2639	UGAAGUGUUUGGGGGAACUC	rco-MIR395e	-38.70	1.14	DangsuA,DangsuB	CUAGAGUUCCCUUGAACACUUCACUGGGACGAAAAUCCAUUCUUCCAACUGAAGUGUUUGGGGGAACUCUUGGU
pyr-2639	UGAAGUGUUUGGGGGAACUC	rco-MIR395d	-40.20	1.03	DangsuA,DangsuB	CUAGAGUUCCCUUGACCACUUCAUUGUGGAUUAUUCUUCAAGCUCAAGGAGUUGGUUUACACUGAAGUGUUUGGGGGAACUCCUGGU
pyr-2639	UGAAGUGUUUGGGGGAACUC	rco-MIR395c	-39.60	0.99	DangsuA,DangsuB	CUAGAGUUCCCUUGAGCACUUCACUGGGAUGAAAAAAGGUCCAGUCUUCCUUCCUACUGAAGUGUUUGGGGGAACUCCUGGU
pyr-2639	UGAAGUGUUUGGGGGAACUC	rco-MIR395b	-46.10	1.02	DangsuA,DangsuB	CUGGAGUUCCCCUGGCCGCUUCAUUGGGGCUAUUAUAUACCCUUAAUUAUACAUGUGUUAUUCCUGCCCUACUGAAGUGUUUGGGGGAACUCUAGGU
pyr-2639	UGAAGUGUUUGGGGGAACUC	rco-MIR395a	-38.70	1.14	DangsuA,DangsuB	CUAGAGUUCCCUUGAACACUUCACUGGGACGAAAAUCCAUUCUUCCAACUGAAGUGUUUGGGGGAACUCUUGGU
pyr-2639	UGAAGUGUUUGGGGGAACUC	mdm-MIR395c	-59.90	1.09	DangsuA,DangsuB	GAAUCAGGUGUCCCCUAGAGUUCCCCCGAACACUUCAUUAAGAUCGAUGCAUAAGUUCUUUGUAUAUUAAAUGAUGAUUGCACCAUCUCUACUGAAGUGUUUGGGGGAACUCCGGGUGUCAUUUGAUC
pyr-2639	UGAAGUGUUUGGGGGAACUC	mdm-MIR395a	-44.80	1.04	DangsuA,DangsuB	CCUAGAGUUCCCCCGAAUACUUCAUUAGGAUCGAUACAUAAAUUCUUUGAAGGAUUGCACCGUCUCUACUGAAGUGUUUGGGGGAACUCCGGG
pyr-2639	UGAAGUGUUUGGGGGAACUC	mdm-MIR395g	-55.50	0.99	DangsuA,DangsuB	GAAAAGAAUAAGGUCUGCAAUGCUAUCAGGUGUUACCAAGAGUUCCCUUGACCACUUCAUUGGGAAAUAGUCUCUUUUGUAACUAUAAAUCCUACUGAAGUGUUUGGGGGAACUCCUGGUUGCAUUUGAUUUUACAAAGAACAAAAAUUAUC
pyr-2639	UGAAGUGUUUGGGGGAACUC	mdm-MIR395f	-59.90	1.09	DangsuA,DangsuB	GAAUCAGGUGUCCCCUAGAGUUCCCCCGAACACUUCAUUAAGAUCGAUGCAUAAGUUCUUUGUAUAUUAAAUGAUGAUUGCACCAUCUCUACUGAAGUGUUUGGGGGAACUCCGGGUGUCAUUUGAUC
pyr-2639	UGAAGUGUUUGGGGGAACUC	mdm-MIR395e	-59.90	1.09	DangsuA,DangsuB	GAAUCAGGUGUCCCCUAGAGUUCCCCCGAACACUUCAUUAAGAUCGAUGCAUAAGUUCUUUGUAUAUUAAAUGAUGAUUGCACCAUCUCUACUGAAGUGUUUGGGGGAACUCCGGGUGUCAUUUGAUC
pyr-2639	UGAAGUGUUUGGGGGAACUC	mdm-MIR395d	-52.80	0.80	DangsuA,DangsuB	AUCAGGUGUCCCCUAGAGUUCCCUUGACCACUUCAUUGGGAGGUGAGAGAUCAAUCGUGGAUAUGGUUUUCGAACAAUUGUCCUCCACUCCUCCUAUGUAUUCCUACUGAAGUGUUUGGGGGAACUCCUGGUGUCAUAUGAU
pyr-2639	UGAAGUGUUUGGGGGAACUC	mdm-MIR395i	-48.50	1.01	DangsuA,DangsuB	UCAGGUGUCACCAAGAGUUCCCUUGACCACUUCAUUGGGAAAUAGUCUCUUUUGCAACUAAAUAUCCUACUGAAGUGUUUGGGGGAACUCCCGGCGGCAUUUGA
pyr-2639	UGAAGUGUUUGGGGGAACUC	bna-MIR395b	-42.10	1.14	DangsuA,DangsuB	UCCUAGAGUUCCUCUGAGCACUUCAUUGGAGAUACCGUUUAUUUUCUAUCAAAAUGUAUUCCACUGAAGUGUUUGGGGGAACUCCUGGA
pyr-2639	UGAAGUGUUUGGGGGAACUC	bna-MIR395c	-43.00	1.16	DangsuA,DangsuB	UGUUUCCUAGAGUUCCUCUGAGCACUUCAUUGGAUAUAACAUUUUCUAUCAAAAAGAAAUGUAUUCUACUGAAGUGUUUGGGGGAACUCCUGGACUCA
pyr-2639	UGAAGUGUUUGGGGGAACUC	bna-MIR395a	-45.80	1.27	DangsuA,DangsuB	UCCUAGAGUUCCUCUGAGCACUUCAUUGGGUAUACAAUUUCUUAUGAAGAUUACCCACUGAAGUGUUUGGGGGAACUCCUGGA
pyr-2639	UGAAGUGUUUGGGGGAACUC	ptc-MIR395h	-42.60	0.87	DangsuA,DangsuB	GUGUCCCCUAGAGUUCCUCUGAGCACUUCAUUGGGGAUCUUCCAUCGACCUGAAAGAGUAUUAUCAUUCCUACUGAAGUGUUUGGGGGAACUCCUGGUGUCA
pyr-2639	UGAAGUGUUUGGGGGAACUC	ptc-MIR395i	-42.60	0.87	DangsuA,DangsuB	GUGUCCCCUAGAGUUCCUCUGAGCACUUCAAUGGGGAUCUUCCAUCGACCUGAAAGAGUAUUAUCAUUCCUACUGAAGUGUUUGGGGGAACUCCUGGUGUCA
pyr-2639	UGAAGUGUUUGGGGGAACUC	ptc-MIR395j	-43.00	0.86	DangsuA,DangsuB	GUGUCCCCUAGAGUUCCUCUGAGCACUUCAUUGGGGAUCUUCCAUCGACCUGAGAGAGUAUUAUCAUUCCUACUGAAGUGUUUGGGGGAACUCCUGGUGUCA
pyr-2639	UGAAGUGUUUGGGGGAACUC	ptc-MIR395k	-63.00	0.82	DangsuA,DangsuB	GAAACGCAAAGAACGUUAGCUGUCCCCCGGAGUUUCCCUGACCACUUCACUGGGGCUAUAAUUCUACUCUUCGUGUUCAAGGGUAGUGGCAACCCUUCCUCACUGAAGUGUUUGGGGGAACUCUGGGUGGCAUUUGACACUGUUUAGCAGUC
pyr-2639	UGAAGUGUUUGGGGGAACUC	ptc-MIR395d	-42.70	0.93	DangsuA,DangsuB	GUGUCCCCUAGAGUUCCUCUGAGCACUUCACUGGGAAUUUCCGAUCAAAUGAAAGAGUAUUAUCAUUCCUACUGAAGUGUUUGGGGGAACUCCUGGUGUCA
pyr-2639	UGAAGUGUUUGGGGGAACUC	ptc-MIR395e	-58.00	0.97	DangsuA,DangsuB	CUGUCCCCCGGAGUUUCCCUGACCACUUCACUGGGGCUAUAAUUCUACUCUUCGUGUUUAAGGGUAGAGGCAACCCUUCCUCACUGAAGUGUUUGGGGGAACUCUGGGUGGCA
pyr-2639	UGAAGUGUUUGGGGGAACUC	ptc-MIR395f	-58.30	0.97	DangsuA,DangsuB	CUGUCCCCCGGAGUUUCCCUGACCACUUCACUGGGGCUAUAAUUCUACUCUUCGUGUUUAAGGGUAGAGGCAACCCUUCCUCACUGAAGUGUUUGGGGGAACUCUGGGAGGCA
pyr-2639	UGAAGUGUUUGGGGGAACUC	ptc-MIR395g	-42.60	0.87	DangsuA,DangsuB	GUGUCCCCUAGAGUUCCUCUGAGCACUUCAUUGGGGAUCUUCCAUCGACCUGAAAGAGUAUUAUCAUUCCUACUGAAGUGUUUGGGGGAACUCCUGGUGUCA
pyr-2639	UGAAGUGUUUGGGGGAACUC	ptc-MIR395b	-44.30	0.89	DangsuA,DangsuB	GUGUCCCCUAGAGUUCCCUUGAGCACUUCACUGGGACCCUUCAGACCGAAAGAGUAUUAUCUUUCCCACUGAAGUGUUUGGGGGAACUCCUGGUGUCA
pyr-2639	UGAAGUGUUUGGGGGAACUC	ptc-MIR395c	-42.30	0.96	DangsuA,DangsuB	GUGUCCCCUAGAGUUCCUCUGAGCACUUCAUUGGGAAUCUUCGAUUAAAUGAAAGAGUAUUAUCAUUCCUACUGAAGUGUUUGGGGGAACUCCUGGUGUCA
pyr-2639	UGAAGUGUUUGGGGGAACUC	tcc-MIR395a	-56.70	0.91	DangsuA,DangsuB	AGAGAGUCAGCUGUCCUCUGGAGUUCCCCUGACCACUUCACUAGAGGUUUCCUGGACCCUUAAUAGGAAGAAACCUGACCUACUGAAGUGUUUGGGGGAACUCCUGUUGGCACCUGACAAUGU
pyr-2639	UGAAGUGUUUGGGGGAACUC	nta-MIR395a	-42.10	0.94	DangsuA,DangsuB	UUCCCCUUGAGUUCUCCUGAUCACUUCAUUGGGACUUGAAAAAUGCCCUUUAAAUUGAAAUGGUAUUAAUUAUUAAUGCCUACUGAAGUGUUUGGGGGAACUCUAGGAGCCAC
pyr-2639	UGAAGUGUUUGGGGGAACUC	mes-MIR395d	-57.80	1.01	DangsuA,DangsuB	GUCAGGUGUCUCCUGGAGUUCCCCUGAUCACUUCACUGGGGUGGGCUACAGUUUCCAGGAAACCCUACUGAAGUGUUUGGGGGAACUCCGGUGGCCAUUUGAC
pyr-2639	UGAAGUGUUUGGGGGAACUC	nta-MIR395c	-47.60	0.97	DangsuA,DangsuB	UUCCCCUAGAGUUCUCCUGAUCACUUCAUUGGGACUUCAAAAAUGCCCUUAAAAUGGAAAGGGUAUUAAUUAUUAAUGCCUACUGAAGUGUUUGGGGGAACUCCGGGAGCCAC
pyr-2639	UGAAGUGUUUGGGGGAACUC	mes-MIR395b	-32.30	0.98	DangsuA,DangsuB	GAGUUCCCUUGACCACUUCAUUGGGGCUAUAUACUCUACUACUCCCACUGAAGUGUUUGGGGGAACUC
pyr-2639	UGAAGUGUUUGGGGGAACUC	mes-MIR395c	-47.00	1.07	DangsuA,DangsuB	AUCAAGUGUCCCCUAGAGUUCUCCUGAUCACUUCAUUGUAGACUCAAUAAGGAGUAGUUGUUUGCACUGAAGUGUUUGGGGGAACUCCUGGUGUCAUUUGAU
pyr-2639	UGAAGUGUUUGGGGGAACUC	mes-MIR395a	-39.90	1.17	DangsuA,DangsuB	GAGUUCCCCUGAGCACUUCAUUGGGAGCCCUUAAUAUACUUUUGUCUUCCAACUGAAGUGUUUGGGGGAACUC
pyr-2639	UGAAGUGUUUGGGGGAACUC	vvi-MIR395e	-36.00	0.80	DangsuA,DangsuB	CUCCCCUAGAGUUCCCUUGACCACUUCACUGGGGACCUUCUCUAAUUAUAAUGACUUCCUACUGAAGUGUUUGGGGGAACUCCUGGUGCCAU
pyr-2639	UGAAGUGUUUGGGGGAACUC	cme-MIR395b	-40.60	1.16	DangsuA,DangsuB	CCUAGAGUUUCCCUGAACAACUUCAUCUAGGCGAGAAUUUUAAUAAUGCUUUCUUAGAUUGAAGUGUUUGGGGGAACUCUUGGUGUCAA
pyr-2639	UGAAGUGUUUGGGGGAACUC	cme-MIR395c	-31.90	0.97	DangsuA,DangsuB	CUUAGAGUUUCCCUGAACAACUUCACCUAGACAAGAAUUUUUAUAAUGCUUUCUUAGAUUGAAGUGUUUGGGGGAACUCUUGGUGUCAA
pyr-2639	UGAAGUGUUUGGGGGAACUC	cme-MIR395a	-45.00	1.18	DangsuA,DangsuB	ACUAGAGUUCCCUUGAGCACUUCAUUGGAAAAUUGGAAAAUUUGAAAAUUUCAAAUUUUUGUCCAAACCUACUGAAGUGUUUGGGGGAACUCUCGGUGACA
pyr-2639	UGAAGUGUUUGGGGGAACUC	cme-MIR395d	-43.90	1.16	DangsuA,DangsuB	CCUAGAGUUCCCUUCCAAGCACUUCAGCUGAAAAUGUCAAGAAAUUAUUGAUGUUUCUUUACUGAAGUGUUUGGGGGAACUCUCGGCGUAA
pyr-2639	UGAAGUGUUUGGGGGAACUC	cme-MIR395e	-43.30	1.03	DangsuA,DangsuB	UCUUGAGUUCCCUUCCAAGCACUUCAGAAGAAACAACAACCAUUUCUAGUCACAAAAUUUUGUGAUGUGUACUUUACAACUGAAGUGUUUGGGGGAACUCUAGAAGAUAC
pyr-2639	UGAAGUGUUUGGGGGAACUC	csi-MIR395	-49.00	1.00	DangsuA,DangsuB	AUGUCUCCGGGAGUUCCUCCGAUCACUUCAUUGGGGCUAUAUGAUCAUUUAGACAAAAUUUGUCACCCCACUGAAGUGUUUGGGGGAACUCUGGGUGCCAC
pyr-2639	UGAAGUGUUUGGGGGAACUC	mtr-MIR395g	-34.70	1.29	DangsuA,DangsuB	GAGUUCCUCUGAACGCUUCAUAUAAGAGGUUAUCCAUCUUCAUUGAAGUGUUUGGGGGAACUC
pyr-2639	UGAAGUGUUUGGGGGAACUC	cme-MIR395f	-39.50	0.92	DangsuA,DangsuB	UCUUGAGUUCCCUUCCAAACACUUCAGAAGAAACAACAACCAUAGCUAAUAUCACAAAUUAAAACUUUAUGAGAUGCAACUUUCAGCUGAAGUGUUUGGGGGAACUCUGGAAGAUA
pyr-2639	UGAAGUGUUUGGGGGAACUC	cpa-MIR395e	-39.20	1.31	DangsuA,DangsuB	GUUCCCCUGAGCACUUCACCGGAGAUAUAUAUAUAUAUAUAUAUCAAUCUCGCUGAAGUGUUUGGGGGAACUC
pyr-2639	UGAAGUGUUUGGGGGAACUC	cpa-MIR395d	-25.90	0.78	DangsuA,DangsuB	GUUUCCCUGACCACUUCAAUGCAUGCGGGCUCAUUUUAGGCCUAAUACUGAAGUGUUUGGGGGAACUC
pyr-2639	UGAAGUGUUUGGGGGAACUC	cpa-MIR395a	-33.40	1.34	DangsuA,DangsuB	GUUCCCUUAAACACUUCACUGGAUGUUAUCAUUCCACUGAAGUGUUUGGGGGAACUC
pyr-2639	UGAAGUGUUUGGGGGAACUC	cpa-MIR395c	-29.70	0.96	DangsuA,DangsuB	GUUUCCCUGACCACUUCAUUGCAUGAGGGCUGAAUUUAGUCCUAAUACUGAAGUGUUUGGGGGAACUC
pyr-2639	UGAAGUGUUUGGGGGAACUC	cpa-MIR395b	-28.70	1.25	DangsuA,DangsuB	GUUCCCUUAAACACUUCACUGAAUUUCAUUAUUCCACUGAAGUGUUUGGGGGAACUC
pyr-2639	UGAAGUGUUUGGGGGAACUC	ppe-MIR395f	-61.50	1.14	DangsuA,DangsuB	CAUCAGGUGUCCCCUAGAGUUUCCUCGAACACUUCAUUAGGAUGUCUAACUCUCUUAAUUAAACUAAUUAAGGGAUAAGUUAUACUUACAGUCUCUACUGAAGUGUUUGGGGGAACUCCGGGUGUCAUUUGAUG
pyr-2639	UGAAGUGUUUGGGGGAACUC	ppe-MIR395g	-58.50	1.24	DangsuA,DangsuB	UGUUGUCAGGUGUCACCAAGAGUUCCCUCACUCACUUCAUUGGGAAAUAAUUCUUUCUGAUCAAUUAUAUAUCCUACUGAAGUGUUUGGGGGAACUCCUGGUGGCAUUUGAUUUUACA
pyr-2639	UGAAGUGUUUGGGGGAACUC	ppe-MIR395d	-74.00	0.88	DangsuA,DangsuB	AUCCGUGGUAAUGUACUUAUUGUAGAAGCUGUGAUGAAAAAAGAGGAAAUAUUGUCAGGUGUCACCGAGAGUUCUCUUGACCACUUCAUUGGGAAAUAAUUCAUUCUGAUCAAUUAUAUAUCCCACUGAAGUGUUUGGGGGAACUCCUGGUGGCAUUUGAUUUUACAAAGAAUAACAAAGCUCUUACAAGCUUUCCACAUAUCCACCGCCAUGGAU
pyr-2639	UGAAGUGUUUGGGGGAACUC	ppe-MIR395e	-62.00	1.32	DangsuA,DangsuB	GUCAGGUGUCACCGAGAGUUCCCUUGAACACUUCAUUGGGAAAUAAUUAGUUCUGAUCUAUUAUGUAUCCCACUGAAGUGUUUGGGGGAACUCCUGGUGGCAUUUGAU
pyr-2639	UGAAGUGUUUGGGGGAACUC	ppe-MIR395c	-50.80	1.21	DangsuA,DangsuB	GUCAAGUGUCACUGAGAGUUCCCUUGACCACUUCAUUGGGAAAUAAUUCUUUCUGAUCAAUUAUAUAUCUUACUGAAGUGUUUGGGGGAACUCCUAGUGGCAUUUGAU
pyr-2639	UGAAGUGUUUGGGGGAACUC	ppe-MIR395n	-58.30	1.33	DangsuA,DangsuB	UCAGGUGUCACCUAGAGUUCUCUUGACCACUUCAUUGGGAAAUAGUCUUCUUUCGACUAUACAUUCUACUGAAGUGUUUGGGGGAACUCUAGGUGGCAUUUGA
pyr-2639	UGAAGUGUUUGGGGGAACUC	bra-MIR395d	-49.80	1.16	DangsuA,DangsuB	GUCGGAUGUUUCCUAGAGUUCCUCUGAGCACUUCAUUGGAUAUAACAUUUUCUAUCAAAAAGAAAUGUAUUCUACUGAAGUGUUUGGGGGAACUCCUGGACUCAUUCG
pyr-2639	UGAAGUGUUUGGGGGAACUC	ppe-MIR395m	-57.80	0.86	DangsuA,DangsuB	GUCAGUUGUCCCCUAGAGUUUCCCUGACCACUUCACUGGGAUCAAGCUUUCCAAAACCCUUCAACUGAGGGUGAAAUUCCAUGCAUGCCAUCCCACUGAAGUGUUUGGGGGAACUCUGGUUGCCACCUGAC
pyr-2639	UGAAGUGUUUGGGGGAACUC	bra-MIR395b	-42.70	1.15	DangsuA,DangsuB	AUGUUUCCUAGAGUUCCUCUGAGCACUUCAUUGGAGAUACCAUUUAUUUUCUAUCAAAAUGUAUUCCACUGAAGUGUUUGGGGGAACUCCUGGA
pyr-2639	UGAAGUGUUUGGGGGAACUC	bra-MIR395c	-50.90	1.18	DangsuA,DangsuB	GUCGGAUGUUUCCUAGAGUUCCUCUGAGCACUUCAUUGGAUAUAACAUUUUUUCUAUCAAAAUUAAAUGUAUUCCACUGAAGUGUUUGGGGGAACUCCUGGACUCAUUCG
pyr-2639	UGAAGUGUUUGGGGGAACUC	ppe-MIR395h	-44.00	0.85	DangsuA,DangsuB	GUCAGAUGACCCCUAGAGUUUCUUUGACCAUUUCAUUGGGUGAUGAACCGAUAAACGAUCUUUUUCGAUAAGUUAUUUCUCAAAUAGAAGUUCCUACUGAAGUGUUUGGGGGAACUCCUGGGAUCAUUUGAU
pyr-2639	UGAAGUGUUUGGGGGAACUC	bra-MIR395a	-47.30	1.15	DangsuA,DangsuB	AUGUCUCCUAGAGUUCCUCUGAGCACUUCAUUGGGUAUACAAUUUCUUAUGAAGAUUACCCACUGAAGUGUUUGGGGGAACUCCUGGACCCAU
pyr-2639	UGAAGUGUUUGGGGGAACUC	sly-MIR395a	-59.40	0.78	DangsuA,DangsuB	AGGGCUUACUUUGAUGUUGGAAGCCUUGCUGAAGUGUUUGGGGGAACUCCCGGGUUGACUUUGAAAAUUACGCAAACAAGUAUAUAUAAAUGCAUGAGUACGUAUUAGCUAAAGAUGAUGAGUACAAUAUUGAUUCAUGUACCUUUGGAGUUCCCUUGACCACUUCAUGAGAGCUUAAUAUUUGAUUGUUUGAAGUCCU
pyr-2639	UGAAGUGUUUGGGGGAACUC	aly-MIR395g	-50.30	1.09	DangsuA,DangsuB	GUCGGAUGUUCCCUAGAGUUCCUCUGAGCACUUCAUUGGAGAUACCAUUGUCUAUGAAAUAGUAUUCUACUGAAGUGUUUGGGGGAACUCCUGGACUCAUUCGAU
pyr-2639	UGAAGUGUUUGGGGGAACUC	sly-MIR395b	-47.00	1.02	DangsuA,DangsuB	UUAAGGUGUUCCCUAGAGUUCCCUUGACCACUUCAUGAGGGCUUACUUUGAUGUUAGAAGCGUUGCUGAAGUGUUUGGGGGAACUCCUGGGUUGACUUUAA
pyr-2639	UGAAGUGUUUGGGGGAACUC	vvi-MIR395f	-43.60	0.99	DangsuA,DangsuB	GUACCCUAGAGUUCCCCUGACCACUUCACUGGGGAUCUUCUCUAAUGACUUCCCACUGAAGUGUUUGGGGGAACUCCUGGUGUCAU
pyr-2639	UGAAGUGUUUGGGGGAACUC	aly-MIR395e	-55.20	1.20	DangsuA,DangsuB	GUCGGAUGUUUCCUAGAGUUCCUCUGAGCACUUCAUUGGAGAUACCAUCUUUUAUCAAAUGGUUUUCUACUGAAGUGUUUGGGGGAACUCCCGGACUCAUUCGAU
pyr-2639	UGAAGUGUUUGGGGGAACUC	vvi-MIR395g	-43.00	1.00	DangsuA,DangsuB	GUCCCCUAGAGUUCCCCUGAGCACUUCAUUGGGGAUCCUUAGUUUUCAAUUCCUACUGAAGUGUUUGGGGGAACUCCCGGUGUCAU
pyr-2639	UGAAGUGUUUGGGGGAACUC	nta-MIR395b	-40.60	0.90	DangsuA,DangsuB	UUCCCCUUGAGUUCUCCUGAUCACUUCAUUGGGACUUGAAAAAUGCCCUUAAAUUGAAAUGGUAUUAAUUAUUAAUGCCUACUGAAGUGUUUGGGGGAACUCUAGGAGCCAC
pyr-2639	UGAAGUGUUUGGGGGAACUC	vun-MIR395	-34.10	1.03	DangsuA,DangsuB	GAGUUCCCUUGAACGCUUCAUUAAGGGUUGUAUCAUUCGUAUAAACAGAUAAUUCCAUACUGAAGUGUUUGGGGGAACUCC
pyr-2639	UGAAGUGUUUGGGGGAACUC	stu-MIR395i	-27.50	0.89	DangsuA,DangsuB	GUUCCCUUGACCACUUCAUGAUGGUUUAAUAACUUCAUUUUUUGUGCCCUCCUGAAGUGUUUGGGGGAACUC
pyr-2639	UGAAGUGUUUGGGGGAACUC	stu-MIR395h	-27.50	0.89	DangsuA,DangsuB	GUUCCCUUGACCACUUCAUGAUGGUUUAAUAACUUCAUUUUUUGUGCCCUCCUGAAGUGUUUGGGGGAACUC
pyr-2639	UGAAGUGUUUGGGGGAACUC	stu-MIR395j	-30.00	1.11	DangsuA,DangsuB	GUUCCCUUGACCACUUCAUUAGGAAUUAAUUACUUCAUUUUUAAUGUCCUACUGAAGUGUUUGGGGGAACUC
pyr-2639	UGAAGUGUUUGGGGGAACUC	stu-MIR395e	-28.60	0.87	DangsuA,DangsuB	GUUCUCUUGACCGCUUCAUUAGGGUUUACUUCGUUGUUUGAUGCCCUGCUGAAGUGUUUGGGGGAACUC
pyr-2639	UGAAGUGUUUGGGGGAACUC	stu-MIR395d	-30.00	1.11	DangsuA,DangsuB	GUUCCCUUGACCACUUCAUUAGGAAUUAAUUACUUCAUUUUUAAUGUCCUACUGAAGUGUUUGGGGGAACUC
pyr-2639	UGAAGUGUUUGGGGGAACUC	stu-MIR395g	-26.80	0.81	DangsuA,DangsuB	GUUCCCUUGACCACUUCAUCAUGAGGGGUUGAUAUCUUCUUUUUUGAUGUCUUGCUGAAGUGUUUGGGGGAACUC
pyr-2639	UGAAGUGUUUGGGGGAACUC	stu-MIR395f	-34.50	1.01	DangsuA,DangsuB	GUUCCCUUGACCACUUCAUGAGGGCUUACUUCGUUGUUUGAAGCCCUACUGAAGUGUUUGGGGGAACUC
pyr-2639	UGAAGUGUUUGGGGGAACUC	stu-MIR395a	-28.80	0.90	DangsuA,DangsuB	GUUCCCUUGACCACUUCAUGAGGGAUUAAUUUCUUCAUUUUUGUUGCCCUGCUGAAGUGUUUGGGGGAACUC
pyr-2639	UGAAGUGUUUGGGGGAACUC	stu-MIR395c	-31.40	0.98	DangsuA,DangsuB	GUUCCCUUGACCACUUCAUGAGGGCUUAAUUACUUCAUUUUUGAUGUCCUGCUGAAGUGUUUGGGGGAACUC
pyr-2639	UGAAGUGUUUGGGGGAACUC	stu-MIR395b	-28.80	0.90	DangsuA,DangsuB	GUUCCCUUGACCACUUCAUGAGGGAUUAAUUUCUUCAUUUUUGUUGCCCUGCUGAAGUGUUUGGGGGAACUC
pyr-2639	UGAAGUGUUUGGGGGAACUC	vvi-MIR395l	-40.10	0.87	DangsuA,DangsuB	GCCCCCUAGAGUUCCCCUGACCACUUCACUGGGGGAUCUUCUGUAAUGACUUCCUACUGAAGUGUUUGGGGGAACUCCUGGUGUCAU
pyr-2639	UGAAGUGUUUGGGGGAACUC	atr-MIR395	-63.70	0.90	DangsuA,DangsuB	GCAUUGGGAGACCCCUAGAGUUCCCUCAACCCCUUCAGCGAUGUGCUCUCUCCUAUACAAGAGAGAGAGAGAGUUUAUGCUGGUGUUUUGGAGAGAGAGUUUACGCUGAAGUGUUUGGGGGAACUCCUGGAGUCACUCAAUAGU
pyr-2639	UGAAGUGUUUGGGGGAACUC	gma-MIR395b	-37.80	1.02	DangsuA,DangsuB	UCCCUAGAGUUUCCCUGAACACUUCAUUAAAGGGCUUUAUUGAAAUAUAAUCCAAAGUUAGUCUAUACUGAAGUGUUUGGGGGAACUCCUGGUGA
pyr-2639	UGAAGUGUUUGGGGGAACUC	gma-MIR395c	-37.30	0.93	DangsuA,DangsuB	CCUAGAGUUCCCCUUAAUGCUUCAUUGAGGAUUCUGUUUAGGUCCAAUUUAACUAGUCCCUACUGAAGUGUUUGGGGGAACUCCGGG
pyr-2639	UGAAGUGUUUGGGGGAACUC	vvi-MIR395d	-40.10	0.91	DangsuA,DangsuB	GCCCCCUAGAGUUCCCCUGACCACUUCAUUGGGGAUCUUCUCUAAUGACUUCCUACUGAAGUGUUUGGGGGAACUCCUGGUGUCAU
pyr-2639	UGAAGUGUUUGGGGGAACUC	gma-MIR395a	-46.70	0.97	DangsuA,DangsuB	UCAGGUUUUCCCUAGAGUUCCCCUGAACGCUUCAUUAAAGGGCUUUAUUAUCAUAUAGUCCCAAGUUAGUCCAUACUGAAGUGUUUGGGGGAACUCCCGGUGAUACUUGA
pyr-2639	UGAAGUGUUUGGGGGAACUC	vvi-MIR395b	-34.40	0.75	DangsuA,DangsuB	GUCCCCUAGAGUUCCCCUUACCACUUCACUGGGGAUCUUCUCUAAUGAAUGCCUACGUACUGAAGUGUUUGGGGGAACUCCUGGUGCCAU
pyr-2639	UGAAGUGUUUGGGGGAACUC	vvi-MIR395c	-36.50	0.79	DangsuA,DangsuB	GUCCCCUAGAGUUCCCUUGACCACUUCACUGGGGACCUUCUCUAGUUAUAAUGACUUCCUACUGAAGUGUUUGGGGGAACUCCUGGUGCCAU
pyr-2639	UGAAGUGUUUGGGGGAACUC	vvi-MIR395a	-39.50	0.88	DangsuA,DangsuB	GUCCCCUAGAGUUCCCUUGAUCACUUCACUAGGGAGCUUCGCUAGUUUUAAUGACUUCCUACUGAAGUGUUUGGGGGAACUCCUGGUACCGA
pyr-2639	UGAAGUGUUUGGGGGAACUC	ath-MIR395d	-41.90	1.05	DangsuA,DangsuB	AUGUCCUCUAGAGUUCUCCUGAACACUUCAUUGGAAAUUUGUUAUUCAGUAAGCUAACAGUUAAUUCCACUGAAGUGUUUGGGGGAACUCCCGAUGUCAU
pyr-2639	UGAAGUGUUUGGGGGAACUC	ath-MIR395e	-39.10	1.09	DangsuA,DangsuB	AUGUUUUCUAGAGUUCCUCUGAGCACUUCAUUGGAGAUACAAUUUUUUAUAAAAUAGUUUUCUACUGAAGUGUUUGGGGGAACUCCCGGGCUGAU
pyr-2639	UGAAGUGUUUGGGGGAACUC	vvi-MIR395j	-40.10	0.91	DangsuA,DangsuB	GCCCCCUAGAGUUCCCCUGACCACUUCACUGGGGAUCUUCUUUAAUGACUUCCUACUGAAGUGUUUGGGGGAACUCCUGGUGUCAU
pyr-2639	UGAAGUGUUUGGGGGAACUC	vvi-MIR395k	-36.00	0.82	DangsuA,DangsuB	UCCCCUAGAGUUCCCUUGACCACUUCACUGGGGACCUUCUCUAAUUAUAAUGACUUCCUACUGAAGUGUUUGGGGGAACUCCUGGUGCCAUU
pyr-2639	UGAAGUGUUUGGGGGAACUC	ath-MIR395a	-41.00	1.00	DangsuA,DangsuB	AUGUCUCCUAGAGUUCCUCUGAGCACUUCAUUGGGGAUACAAUUUUUCUAAAUGAUUAUCCACUGAAGUGUUUGGGGGAACUCCCGGACCCAU
pyr-2639	UGAAGUGUUUGGGGGAACUC	tcc-MIR395b	-54.70	0.94	DangsuA,DangsuB	UAUGCCAGGUGCCCACUAGAGUUCCCCUGGGCACUUCAGUUGAUUUCUUUAGAGCUCAAAACCUCUUACCUGUCUACUGAAGUGUUUGGGGGAACUCCGGUUGCCAUCUGAGACAGU
pyr-2639	UGAAGUGUUUGGGGGAACUC	vvi-MIR395m	-40.80	0.91	DangsuA,DangsuB	GUCCCCUAGAGUUCCCUUGAACACUUCACUGGGGACCUUCUCUAGUUAUAAUGACUUCCUACUGAAGUGUUUGGGGGAACUCCUGGUGCCAU
pyr-2639	UGAAGUGUUUGGGGGAACUC	ppe-MIR395k	-52.80	1.32	DangsuA,DangsuB	CCUGGAGUUCCCUUGAACACUUCAUUGGGAAAAUUAUAAGGGUAGUUCAUAUGUACCCUAAUUUAUCCUACUGAAGUGUUUGGGGGAACUCUGGG
pyr-2639	UGAAGUGUUUGGGGGAACUC	vvi-MIR395h	-36.00	0.82	DangsuA,DangsuB	GUCCCCUAGAGUUCCCUUGACCACUUCACUGGGGACCUUCUCUAAUUAUAAUGACUUCCUACUGAAGUGUUUGGGGGAACUCCUGGUGCUAU
pyr-2639	UGAAGUGUUUGGGGGAACUC	ppe-MIR395l	-55.40	1.20	DangsuA,DangsuB	UCAGGUGUCACCUAGAGUUCCUCUGACCACUUCAUUGGGAAAUAGUCUUCUUGUAACUAUACAUCCUACUGAAGUGUUUGGGGGAACUCCAGGUGGCAUUUGA
pyr-2639	UGAAGUGUUUGGGGGAACUC	ppe-MIR395j	-58.40	1.22	DangsuA,DangsuB	GUCAGUUGUUCCUGGAGUUCCCUUGAACACUUCAUUGGGGAAAUUAUAAGGGUAGUUCAUAUGUACCUUAAUUUAUCCUACUGAAGUGUUUGGGGGAACUCUGGGUAUCAUCUGAC
pyr-2639	UGAAGUGUUUGGGGGAACUC	ppe-MIR395i	-50.50	1.17	DangsuA,DangsuB	UGUUGUCAGGUGUCACCGAGAGUUCCCUUACUCACUUCAUUGGGAAAUAAUUAUUUUUGAUAAAUUAUAUAUCCUACUGAAGUGUUUGGGGGAACUCCUGGUUGCAUUUGAUUUUACA
pyr-2639	UGAAGUGUUUGGGGGAACUC	tae-MIR395b	-57.10	1.02	DangsuA,DangsuB	CUGAAGUGUUUGGGGGAACUCUUGGUGUCACCAAGCAUUUAGUAGACAUUGGCCACAUAUCAUAAGAGAGAUGCAUCAAUGGGCUGAAUGUUUGGUCUUACCAUGGGUUCCUUGCAAGCACUUC
pyr-2639	UGAAGUGUUUGGGGGAACUC	lus-MIR395d	-94.90	0.92	DangsuA,DangsuB	GGCCGAAGUCAGAUGUCGACUGGAGUUCCCUUGACCACUUCAUUGAGAAGCUAAUGCUAAGUGCUUUCACUGAAGUGUUUGGGGGAACUCUAGGGGUCAUUUGACAAAAAAUUUACGAGGGCUUUAGUCAGAUGUUAACUGGAGUUCCCUUGACCACUUCAUUGGAAAGUUGAUGCUACAAGCUCUCAUUGAAAUGUUUGGGGAAACUCUACAAGCCAUUUGACAAAAAAAUGUUGGCC
pyr-2639	UGAAGUGUUUGGGGGAACUC	lus-MIR395c	-50.90	1.02	DangsuA,DangsuB	GUCAGAUGUCUACUGGAGUUCCCUUGACCACUUCAUUGGGGACUCGUCAUCUUUCGGUCCUACUGAAGUGUUUGGGGGAACUCUAGCAGCCCAUUUGAC
pyr-2639	UGAAGUGUUUGGGGGAACUC	lus-MIR395b	-54.30	1.06	DangsuA,DangsuB	ACCAGGUCUCCCCUGGAGUUCCCCUGAACGCUUCACUGAGAGGCUCUGUCAUUCUUACUGAAGUGUUUGGGGGAACUCUGGCUGUGGCUUGGU
pyr-2639	UGAAGUGUUUGGGGGAACUC	lus-MIR395a	-52.60	1.03	DangsuA,DangsuB	AUCAGUUGUCUCCUUGAGUUCUCCUCAUCACUUCAUUGGGUUAACUUGUUGAUUUAUGUAUGAUGAUCAUAAGCAAGCAUCCUACUGAAGUGUUUGGGGGAACUCUGGGCGGCAUCUGAU
pyr-2639	UGAAGUGUUUGGGGGAACUC	aly-MIR395d	-54.90	1.00	DangsuA,DangsuB	ACAAAAUAUAAUUCGACUAGAUGUCCUCUAGAGUUCUCCCGAACACUUCAUUGGAAAUUUGUUAUUCGGUAAACUACCAAUUAAUUCCACUGAAGUGUUUGGGGGAACUCCGGAUGUCAUUUGGUGAUGUCAAGCCAUGU
pyr-2639	UGAAGUGUUUGGGGGAACUC	ata-MIR395a	-44.10	1.08	DangsuA,DangsuB	CUCGUCGGGAGUUCCCUUCAAGCACUUCAGGAAGCAUCUUUUGUAGGGCAUUUCUGAAGUGUUUGGGGGAACUCUUGUUGUCAC
pyr-2639	UGAAGUGUUUGGGGGAACUC	ata-MIR395f	-41.70	0.99	DangsuA,DangsuB	CUCGUCGGGAGUUCCCUUCAAGCACUUCAGGAAGCAUCUCUUUCAAGGCAUUUCUGAAGUGUUUGGGGGAACUCUUGUUGUCGC
pyr-2145	GGGAAUCUUGAUGAUGCUGCA	ath-MIR172e	-52.50	0.89	DangsuA,DangsuB	GUAGUCGCAGAUGCAGCACCAUUAAGAUUCACAAGAGAUGUGGUUCCCUUUGCUUUCGCCUCUCGAUCCGCAGAAAAGGGUUCCUUAUCGAGUGGGAAUCUUGAUGAUGCUGCAUCAGCAAAUAC
pyr-2145	GGGAAUCUUGAUGAUGCUGCA	atr-MIR172	-110.50	0.84	DangsuA,DangsuB	GUUGUUUGUUUGAUGCAUGGGGUAGAAGAGAGAGAAAAGAAGAAAAAAGAGGAGGAGGAGGAGGAUAUCAGUCAGUGUUUGCUGGUGUAGCAUCAUCAAGAUUCACAUCUUGUAAGAGAUCCCUUUGAAUCGGUGGGAUCACACUUCACUACAUAAGAUCACGAUUUAGAGAGGGAAAGCUGACCAUAAGAUGGGAAUCUUGAUGAUGCUGCAUCGGCAAUAAGUGACUUUGUGUUUCACCGUUCGUUGCCACCCUCAUUUGCACUCUCCUCGGCAAAGGUGAGAGAAACAGAGGAC
pyr-2145	GGGAAUCUUGAUGAUGCUGCA	mes-MIR172f	-67.40	1.05	DangsuA,DangsuB	UUGCUGAUGGAGCAUCAUCAAGAUUCACACACUUUAUCCAGGGCUAGUGGAGUAGAAGUUUAUGGUGGCUUUUCUUGGUCGCUUUUGCUUCAAUCCAAACGGCCCUUUGAUAUGGGAAUCUUGAUGAUGCUGCAGCGGCAA
pyr-2145	GGGAAUCUUGAUGAUGCUGCA	mes-MIR172e	-77.70	0.98	DangsuA,DangsuB	AGUCACUGUUUGCCGAUGGAGCAUCAUCAAGAUUCACAAACUUUAUCUGGGGCUCGUGGGGGUGGAGAACUUGGUGAUAGUGGCUUUUGGUGUGGUCCCUUUUGCUUCAAUCCAAAUAGCCCUUUGAUAUGGGAAUCUUGAUGAUGCUGCAGCGGCAAUAAGUGGCU
pyr-2145	GGGAAUCUUGAUGAUGCUGCA	vvi-MIR172c	-54.30	0.82	DangsuA,DangsuB	GUUUGCGGAUGGAGCAUCAUCAAGAUUCACAAGUAUUGAGACUCAGUGCGUGGUGGUGAUGGUGACUUUUGUGGUCCCUUCCUACACUCCGAUGGCUCUUUGAUGUGGGAAUCUUGAUGAUGCUGCAGCGGCAAUAAA
pyr-2145	GGGAAUCUUGAUGAUGCUGCA	aqc-MIR172b	-43.90	1.05	DangsuA,DangsuB	GUGCAGCAUCAUUAAGAUUCACAAACCCUAAGAGCCUUAUGAUGGGUUUUGAUAUUGAUCACUCUUAUAGGACUUUAUAGAGAUGGGAAUCUUGAUGAUGCUGCAUCG
pyr-2145	GGGAAUCUUGAUGAUGCUGCA	osa-MIR172b	-94.50	0.94	DangsuA,DangsuB	GUGAUUUCUGACGUGGCAUCAUCAAGAUUCACACAUUACAUUGCAUGCAUGCAUAUGUCUAUGCAUCUUUGAGCUUGUUGUUCUGAUCUCAACAACCUAGCUAGCUAAUAUUUCUCUCCUGGCCCUGACCUGCAUGAUGCAUGGUUGCACGCAUGGAGAGAGAAGAGAGAGAUCGAAGCUAAUUAAACGCAUGUGUAUAUAUGUGUGGGAAUCUUGAUGAUGCUGCAUCGGAAAUUAA
pyr-2145	GGGAAUCUUGAUGAUGCUGCA	ptc-MIR172h	-55.80	0.89	DangsuA,DangsuB	CUGUUUGCCGAUGGAGCACCAUCAAGAUUCACAAACUUUAUUAGGGCUAAUAAGUGGUGAUGAUGGUGGCUUUUGGUGGUCCCUUCGUUUCAACCCAAUAGCCAUUUGAAUUGGGAAUCUUGAUGAUGCUGCAGCGGCAAUAA
pyr-2145	GGGAAUCUUGAUGAUGCUGCA	tcc-MIR172a	-64.80	1.10	DangsuA,DangsuB	ACAGUCACUGUUUGCUGAUGGAGCAUCAUCAAGAUUCACAAAACUUUUUUUAGGGCUAAUGAUCAAUGGUGAAGAUCAUGCUUCACUAUACAAUCAGCCCUUUGAAUAUGUAUGGGAAUCUUGAUGAUGCUGCAGCGGCAAUAAAUGGCUAAAU
pyr-2145	GGGAAUCUUGAUGAUGCUGCA	aly-MIR172e	-55.70	0.90	DangsuA,DangsuB	GCCAGUAGUCGCAGAUGCAGCACCAUUAAGAUUCACAAGAGAUGUGGUUCCCUUUGUUUUUGCCUCUCGAUCCGAAGAAAAGGGUUCCUUUCGAGUGGGAAUCUUGAUGAUGCUGCAUCAGCAAAUACAUGGC
pyr-2145	GGGAAUCUUGAUGAUGCUGCA	ptc-MIR172e	-56.50	0.93	DangsuA,DangsuB	AUAUUGGCCGAUGCGGCAGCAUCAAGAUUCACAAACUUUAAGGCUUGAGUUGGGGUGGUACACGGUCCCCUCCUUUACUCGAAAGGUUCCUUAAUUUCUGAUGGGAAUCUUGAUGAUGCUGCAUCGGCAAAUA
pyr-2145	GGGAAUCUUGAUGAUGCUGCA	ptc-MIR172d	-97.30	1.09	DangsuA,DangsuB	GCAUUGGCGGAUGCGGCAUCAUCAAGAUUCACAAGCUUUAAGGCUUGAGUGAGAGGGGUGGCAUACGGUCACCUCCUUUAGCAAGCUUUAAGGCUUGAGUGAGAGGGGUGGCAUACGGUCACCUCCUUUAGUCCAAAGGGUCCUUUUUUAUGGGAAUCUUGAUGAUGCUGCAUCGGCAAAUA
pyr-2145	GGGAAUCUUGAUGAUGCUGCA	ptc-MIR172g	-58.00	0.94	DangsuA,DangsuB	CUGUUUGCCUAUGGAGCAUCAUCAAGAUUCACAAGCUUUAUUAGGGCUAGUGUGUGGUGAUGAUGGUGGCUUUUGGUGGUCCCUUUUUUUCAAUCCAAUAGCCCUUUGAAUUGGGAAUCUUGAUGAUGCUGCAGCGGCAAUAA
pyr-2145	GGGAAUCUUGAUGAUGCUGCA	zma-MIR172e	-69.80	0.91	DangsuA,DangsuB	CAGCCAGCCGGUGAUUUCUGGAGUGGCAUCAUCAAGAUUCACACACUGCAUGCCAACAUAAUGCGCGUGUUCAUGCAUCCAUCGCCGCCGCUGCAUCAUGCAUCAUAUAUAAUAUAUAUAUAUGUGUAUGUGUGGGAAUCUUGAUGAUGCUGCAUUGGAUAUCAAGGGCUAUAU
pyr-2145	GGGAAUCUUGAUGAUGCUGCA	ppe-MIR172d	-59.20	1.12	DangsuA,DangsuB	AGUCAUUGUUUGCGGAUGGAGCAUCAUCAAGAUUCACAAUUUCUUGGGGCUAGCUGCUUUGCUAUUGGCCCUUUGAUGAUAUGGGAAUCUUGAUGAUGCUGCAGCGGCAAUAAAUGGCU
pyr-2145	GGGAAUCUUGAUGAUGCUGCA	sbi-MIR172b	-58.10	0.81	DangsuA,DangsuB	GCGUGGCAUCAUCAAGAUUCACACACUGCUUGCAAAUGCAUACAUGCAUCUCUGCCGCCUUCUUUGCCUGCCAUUAAUAGCAGUUUUACUACAUGUUUUAGCUGCUGCUGCAUCAUAUAUGCCUCUGUGAAUAUAUAUGUGUAUGUGUGGGAAUCUUGAUGAUGCUGCAU
pyr-2145	GGGAAUCUUGAUGAUGCUGCA	nta-MIR172j	-66.10	0.92	DangsuA,DangsuB	GUUUGAGGAUGCAUCAUCAUCAAGAUUCACAAACUUGAAAGGAGAAAGGAUCUACAUACGGGUUAGGUCGAACCCAGUAUAUUUGCUCAAAAUAGUGUAUUUAUCUUAAGAAAUUUAUUAAAUAUGUACAUAUAUUAAAUUUUGAAAUCAUUUAUUACAUUUGAGGUCGUUGUUCUAAAAUCCAAGAUUCUCCUAAAUUUCAUAUGGGAAUCUUGAUGAUGCUGCAUCAUCAAACAU
pyr-2145	GGGAAUCUUGAUGAUGCUGCA	stu-MIR172d	-46.50	1.33	DangsuA,DangsuB	GGAGCAUCAUCAAGAUUCACAUAGCUAUAUUAGGGCUUUUAUAAUUUUUAAAAGCCCUAUGACGAUGUGUGGGAAUCUUGAUGAUGCUGCAG
pyr-2145	GGGAAUCUUGAUGAUGCUGCA	rco-MIR172	-51.37	0.89	DangsuA,DangsuB	CUGAUGGAGCAUCAUCAAGAUUCACAAACUUUAUCUAGGGCUAGUGGGUUGUUGUGGUCCCUUUUCUUUUUCUUUUUUUCUUUUUCUCUUGCUUCAAUCCAAUAGUCCCUUUGAUAUGGGAAUCUUGAUGAUGCUGCAGCGGCA
pyr-2145	GGGAAUCUUGAUGAUGCUGCA	cme-MIR172a	-53.70	0.81	DangsuA,DangsuB	UCCGACGGAGCAUCAUCAAGAUUCACAUGAAAUUUCAUUCGACUUCGCCGGAGAUUGAAGAAAUUUUAAAAAAUAUAAAAAGUUAAAAAAAGAAUCAGCAGUCGGCCUCGUGGGAGAUAUUGAUCUAAUUUCCAAUUGACAUGGGAAUCUUGAUGAUGCUGCAGCGGCAAUCAA
pyr-2145	GGGAAUCUUGAUGAUGCUGCA	tcc-MIR172c	-72.90	1.04	DangsuA,DangsuB	CAAUCUGUCAGUGUUUGCAGAUGCGGCAUCAUCAAGAUUCACAAACUUUAGUAAGGGCUUCUUUUGGAGGCCGGGGAGUGGUAACCAAUCACCUCCUUUACUCGAAAGUUACCUUUCAAAUGGGAAUCUUGAUGAUGCUGCAUCAGCAAACAUAUUGGCUAUU
pyr-2145	GGGAAUCUUGAUGAUGCUGCA	cme-MIR172d	-45.20	0.98	DangsuA,DangsuB	GUUGGUGCAGCACCAUCAAGAUUCACAAAGGCUUUAAUUAUUAUUUACGUUUAAAUUCUCUUUCCUUAAUUUUAUUCAAAUUUAAAAAAGAAAAGAAAGAAAAAAGAAAAAAGCCUUUUCCUUUGGGAAUCUUGAUGAUGCUGCAUCGUCAAAUAC
pyr-2145	GGGAAUCUUGAUGAUGCUGCA	mdm-MIR172j	-71.30	0.91	DangsuA,DangsuB	AGUCAGUAUUCGCGGGUGCAGCAUCAUCAAGAUUCACAUACAGGCAAGGGGGCUACCUUUAUCGAUCGAGUAAAUUGUUACCGCACCAAUAAGAAUAUUUCCUUCAACUUCCUUUUGUACUUGAAAGGUAGUUCCUUCGAAGUGGGAAUCUUGAUGAUGCUGCAUCAGCUGGUACAUGACU
pyr-2145	GGGAAUCUUGAUGAUGCUGCA	mdm-MIR172k	-71.30	0.91	DangsuA,DangsuB	AGUCAGUAUUCGCGGGUGCAGCAUCAUCAAGAUUCACAUACAGGCAAGGGGGCUACCUUUAUCGAUCGAGUAAAUUGUUACCGCACCAAUAAGAAUAUUUCCUUCAACUUCCUUUUGUACUUGAAAGGUAGUUCCUUCGAAGUGGGAAUCUUGAUGAUGCUGCAUCAGCUGGUACAUGACU
pyr-2145	GGGAAUCUUGAUGAUGCUGCA	mdm-MIR172i	-71.30	0.91	DangsuA,DangsuB	AGUCAGUAUUCGCGGGUGCAGCAUCAUCAAGAUUCACAUACAGGCAAGGGGGCUACCUUUAUCGAUCGAGUAAAUUGUUACCGCACCAAUAAGAAUAUUUCCUUCAACUUCCUUUUGUACUUGAAAGGUAGUUCCUUCGAAGUGGGAAUCUUGAUGAUGCUGCAUCAGCUGGUACAUGACU
pyr-2145	GGGAAUCUUGAUGAUGCUGCA	bna-MIR172c	-67.50	1.07	DangsuA,DangsuB	CAGCCGGUAGUUGCAGAUGCAGCAUCAUCAAGAUUCACAAGUGAAGUGGUUUCCUUGGUUUUCGCCUCUCCAUCCGAAAACAAAGGGUUCUUCUCGAAUGGGAAUCUUGAUGAUGCUGCAUCAGCAUAUACAUGGCUA
pyr-2145	GGGAAUCUUGAUGAUGCUGCA	bna-MIR172b	-53.40	1.37	DangsuA,DangsuB	UAGUUGCAGAUGCAGCAUCAUUAAGAUUCACAAGAGAUGUGGUUUUCUUGUUUUCUCGCCUCUUGGGAAUCUUGAUGAUGCUGCAUCAGCAACUA
pyr-2145	GGGAAUCUUGAUGAUGCUGCA	lus-MIR172g	-59.50	1.14	DangsuA,DangsuB	AUUAACAGCCAUAGUUUGCUGAUGGAGCAUCAUCAAGAUUCACAGAUCUAGCUGUGGUACUAUUAUAGUUGGCUAGUAGAGAAAACUUGGGAAUCUUGAUGAUGCUGCAUCGGCAAUCAAUGGCUUAGU
pyr-2145	GGGAAUCUUGAUGAUGCUGCA	lus-MIR172e	-69.40	0.90	DangsuA,DangsuB	GGGUUCACAACAAUAACAGCCACUGCUUGCUAUUGGAGCAUCAUCAAGAUUCACAAACCCACAAAGGCAAAGUUAAAAUAAAAGAGCUUAUCUUUAUAAGCUUUUUUUUUUUCACUUUUGCCCAAAUCAUUCAUGGGCGGGGGUAUUGGGAAUCUUGAUGAUGCUGCAGCGGCAAUCACUGCCUACCU
pyr-2145	GGGAAUCUUGAUGAUGCUGCA	lus-MIR172i	-52.60	0.82	DangsuA,DangsuB	AGCCACUGCUUGCUACUGGAGCAUCAUCAAGAUUCACAACCCCACCCACGGACUACCAAAAAGCUUUCAUCUUUUCAUCAUGACGUUGUGGGUAUUGGGAAUCUUGAUGAUGCUGCAGCGGCAAUCACUGCCU
pyr-2145	GGGAAUCUUGAUGAUGCUGCA	gma-MIR172d	-64.70	1.01	DangsuA,DangsuB	AAAACAGUCGCUGAUUGCAGAUGGAGCAUCAUCAAGAUUCACAAGCUUCAGGGGUUUUUUGUUUGGGGUGGUCCCUUAUUGCUCCCAAAUGAAUUAAGCCCUUUGAUAUGGGAAUCUUGAUGAUGCUGCAGCAGCAAUAAACGACUAACA
pyr-2145	GGGAAUCUUGAUGAUGCUGCA	ata-MIR172c	-100.00	1.09	DangsuA,DangsuB	GAUUUCUGGUGUGGCAUCAUCAAGAUUCACACAAUGUAUGGCAUGCAUGCGAUGCUCUCAUCCUUCCCCAUCCAUGCAUGCAUGUGAACUGUAGUUCCGUUCAUGCAUGGAGAUGGAUGGAUUGAUGAGCUUGCUUGCUCGCUAGCCAGCGUACUAUGUGUGGGAAUCUUGAUGAUGCUGCAUCGGUGAUCAA
pyr-2145	GGGAAUCUUGAUGAUGCUGCA	gma-MIR172i	-58.70	0.89	DangsuA,DangsuB	GCAGGUGCAGCAGCAUCAAGAUUCACACCGCCUAAUUUGCUAGGACUUCAGGACUGCACACGCUUAAUUAUACAUACAUAUAUACAUAUAUGUUAGCUCUUUGUGGAGUGCGGAAUAAAGUUCUAUUUUAGAUGUGGGAAUCUUGAUGAUGCUGCAUCAGC
pyr-2145	GGGAAUCUUGAUGAUGCUGCA	bra-MIR172d	-53.40	1.37	DangsuA,DangsuB	UAGUUGCAGAUGCAGCAUCAUUAAGAUUCACAAGAGAUGUGGUUUUCUUGUUUUCUCGCCUCUUGGGAAUCUUGAUGAUGCUGCAUCAGCAACUA
pyr-2145	GGGAAUCUUGAUGAUGCUGCA	gma-MIR172l	-60.80	0.82	DangsuA,DangsuB	CAGUCUGCAGGUGCAGCGGCAUCAAGAUUCACACUGCCUAAUCAGCUAGGACUUCAUGACUGUACACGCUUAUACAUACAUAUAUAUACAUGUACGUUGGCUCUUUGUGGACGAGUGUGGAAUGAAUAAAGUUCUAUUUUAGAUGUGGGAAUCUUGAUGAUGCUGCAUCAGCAAAUAC
pyr-2145	GGGAAUCUUGAUGAUGCUGCA	gma-MIR172c	-62.80	1.01	DangsuA,DangsuB	AAAUCAGUCACUGUUUGCCGGUGGAGCAUCAUCAAGAUUCACAAGCUUUAGGGGCAUUAAUUUGUUUGAGGUGGUUCCUUAUUGCUCCAAAACCAAUUAGCCCUUUUGCUAUGGGAAUCUUGAUGAUGCUGCAGCAGCAAUAAAUGACUAAUA
pyr-2145	GGGAAUCUUGAUGAUGCUGCA	bdi-MIR172b	-106.40	0.90	DangsuA,DangsuB	GUUCGCGGCGACCAGUCGGUGAUUUCUGCUGUGGCAUCAUCAAGAUUCACACAAAUGCAUGCUAGCUUCGUCUAUGCCAUCCUUUCUCAUCUUUCGAUCUCGAUCUCGGCCCUAAUUAAGUAAUUAUACCCAAUUGUGGAUCGGCCGGAUUGGAGAUCGAUGGAUGCGUGGAGAGGAGCUAGAUUAGCUAUAGCUUAUGUGUGGGAAUCUUGAUGAUGCUGCAUCGGACAUCAGUGACUAAAACAAGUAUGGCA
pyr-2145	GGGAAUCUUGAUGAUGCUGCA	ppe-MIR172c	-69.30	1.02	DangsuA,DangsuB	GGUGCGGCAUCAUCAAGAUUCACAUACUUUAGUGAGGGGUCUACCUUUAUCGAUCGAGUUAAUUGGUACUACUAACACCACCAAUUGAUUUUUGUACUCGAACUUCCUUUAGUACUCGAAAGGUAGUUCCUUUGAACUUUGAAGUGGGAAUCUUGAUGAUGCUGCAUC
pyr-2145	GGGAAUCUUGAUGAUGCUGCA	gma-MIR172e	-64.60	1.03	DangsuA,DangsuB	AAAACAGUCACUGUUUGCCGGUGGAGCAUCAUCAAGAUUCACAAGCUUUAGGGGGCAUUAAUUUGUUUGAGGUGGUCCCUUAUUGAUCCAAACCAAUUAGCCCUUUUGCUAUGGGAAUCUUGAUGAUGCUGCAGCAGCAAUAAAUGACUAAUA
pyr-2145	GGGAAUCUUGAUGAUGCUGCA	gra-MIR172a	-69.10	1.03	DangsuA,DangsuB	GUUUGCAGAUGCGGCAUUAUCAAGAUUCACAAACUUAGUACAGGGUUUCAUUGGAGAGCCAAAGGGUGUGGUUUAGUGGUACCCCUCCACAAAAUCACCUCCUUUUACUUCAAAGUUUUCCUUUCAAAUAUGGGAAUCUUGAUGAUGCUGCAUCAGCAAACA
pyr-299	UGCCUGGCUCCCUGUAUGCC	osa-MIR160b	-66.40	0.89	DangsuA,DangsuB	AAGGUUUGGUUUUGAUCGGCUUGAGAGCGUGCCUGGCUCCCUGUAUGCCACUCAUGUAGCCCAAUCCAUGGUGUGUUUGGAUGCUGUGGGUGGCGUGCAAGGAGCCAAGCAUGCGUGCCAUGAUCUCUCUUUCUGCCUU
pyr-299	UGCCUGGCUCCCUGUAUGCC	osa-MIR160c	-57.80	1.09	DangsuA,DangsuB	GGAAUGUGCCUGGCUCCCUGUAUGCCACUCAUCUAGAGCAACAAACUUCUGCGAGAGGUUGCCUAUGAUGGAUGGCGUGCACGGAGCCAAGCAUAUUCC
pyr-299	UGCCUGGCUCCCUGUAUGCC	osa-MIR160a	-48.80	0.94	DangsuA,DangsuB	GUGUGCCUGGCUCCCUGUAUGCCACACAUGUAGACCAACCCAUGGUGUCUGGUUGCCUACUGGGUGGCGUGCAAGGAGCCAAGCAUGC
pyr-299	UGCCUGGCUCCCUGUAUGCC	osa-MIR160d	-70.60	0.87	DangsuA,DangsuB	GGGGAUAUGCCUGGCUCCCUGUAUGCCACUCGCGUAGCUGCCAAACUCAGUUGAAACAACUGCCUUCUCCCGGCGAGAUUCAGGCAUUGUGUUCGUACGUUUGGCUCUACUGCGGAUGGCGUGCGAGGAGCCAAGCAUGACC
pyr-299	UGCCUGGCUCCCUGUAUGCC	osa-MIR160e	-58.90	0.84	DangsuA,DangsuB	GUAGGGGAUAUGCCUGGCUCCCUGUAUGCCGCUCGCAUGGCUGCCAACCCAAUGAACUCGAUCUCGUUGUUGGCCGCUGCGUACGGCGUGCGAGGUGCCAAGCAUGGCCCUCUU
pyr-299	UGCCUGGCUCCCUGUAUGCC	ath-MIR160a	-46.40	1.01	DangsuA,DangsuB	GUAUGCCUGGCUCCCUGUAUGCCAUAUGCUGAGCCCAUCGAGUAUCGAUGACCUCCGUGGAUGGCGUAUGAGGAGCCAUGCAUAU
pyr-299	UGCCUGGCUCCCUGUAUGCC	ath-MIR160b	-41.70	1.02	DangsuA,DangsuB	GUCGUGCCUGGCUCCCUGUAUGCCACAAGAAAACAUCGAUUUAGUUUCAAAAUCGAUCACUAGUGGCGUACAGAGUAGUCAAGCAUGAC
pyr-299	UGCCUGGCUCCCUGUAUGCC	ath-MIR160c	-51.30	1.12	DangsuA,DangsuB	GUUAUGCCUGGCUCCCUGUAUGCCACGAGUGGAUACCGAUUUUGGUUUUAAAAUCGGCUGCCGGUGGCGUACAAGGAGUCAAGCAUGAC
pyr-299	UGCCUGGCUCCCUGUAUGCC	ptc-MIR160d	-52.40	0.95	DangsuA,DangsuB	AAAUGGGUUAUGCCUGGCUCCCUGUAUGCCACAGCAAAGACCAAUCUCUUCUGUCUUAGAUUGGCUGCUGCCGGUGGCGUGCGAGGAGCCAAGCAUACUCUCU
pyr-299	UGCCUGGCUCCCUGUAUGCC	ptc-MIR160b	-49.10	0.94	DangsuA,DangsuB	AUAUUAUAUGUGCCUGGCUCCCUGUAUGCCAUUUGCAGAGCCCAACGGAUCCUCGAUGGCCUCCGUGGAUGGCGUAUGAGGAGCCAUGCAUAUUCGCA
pyr-299	UGCCUGGCUCCCUGUAUGCC	pab-MIR160a	-53.80	1.08	DangsuA,DangsuB	AAAGGUUGAUGUGUGCCUGGCUCCCUGUAUGCCACAUACAAGGCCCAGUCAUAUGUUGAUUGGCUUCAUAGGUGGCUUACAAGGAGCCAAGCAUACGUUUUCUUAC
pyr-299	UGCCUGGCUCCCUGUAUGCC	pab-MIR160b	-56.10	0.89	DangsuA,DangsuB	GUUGGGGGCACCGCUUAUCUGCCUGGCUCCCUGUAUGCCAUCUGCGUUGCUUAUCAAGAGCGGGAUAUGCCUCACAGUUGGCAUAGAGAGAGCCAAGCAGAACUGCUGUUUCUAGC
pyr-299	UGCCUGGCUCCCUGUAUGCC	ptc-MIR160a	-55.80	1.07	DangsuA,DangsuB	ACAUGGGUUAUGCCUGGCUCCCUGUAUGCCACAAGCAAAGACCAAUCUUUUGUUUUAGAUUGGCUGUUGCCGGUGGCGUGCGAGGAGCCAAGCAUACUCUCU
pyr-299	UGCCUGGCUCCCUGUAUGCC	far-MIR160	-47.90	0.63	DangsuA,DangsuB	UUGUUGCUGAUGGGGACAUGACCUUCGCAUGCCUGUCUCAGCUCGUCGUGCAUGCCUGGCUCCCUGUAUGCCACACAUGUCCUAGUGGUUUGCUGGUUGGCUGGUGUGUUGAGGGUUCAGAACAAUCCAUUAGUCAGUUGGAAUUUGU
pyr-299	UGCCUGGCUCCCUGUAUGCC	mtr-MIR160b	-47.60	1.16	DangsuA,DangsuB	GUAUGUGCCUGGCUCCCUGUAUGCCAUAUAUGAAGCUCAUUGAAAAAUCAAUGACCUUUGUGGAUGGCGUAUGAGGAGCCAAGCAUAUUCC
pyr-299	UGCCUGGCUCCCUGUAUGCC	mtr-MIR160a	-58.50	1.24	DangsuA,DangsuB	AGAUAUAUAUACUAAUUGCGUGCCUGGCUCCCUGUAUGCCAUUUGUAGAGUUCAUCAAGAUGUUGAUGACUUUAAUGAAUGGCGUGCGAGGAGCCAUGCAUGUUGUGUAUAUUUUCUAU
pyr-299	UGCCUGGCUCCCUGUAUGCC	mtr-MIR160d	-50.30	1.12	DangsuA,DangsuB	UAGUGUGCCUGGCUCCCUGUAUGCCAUUUGUAGAGUCCAUCACGACAGUGAUGAACUUAGUGAAUGGCGUACUCGGAGUCAUGCAUGCUGU
pyr-299	UGCCUGGCUCCCUGUAUGCC	mtr-MIR160e	-47.60	1.16	DangsuA,DangsuB	GUAUGUGCCUGGCUCCCUGUAUGCCAUAUAUGAAGCUCAUUGAAAAAUCAAUGACCUUUGUGGAUGGCGUAUGAGGAGCCAAGCAUAUUCC
pyr-299	UGCCUGGCUCCCUGUAUGCC	vun-MIR160	-50.20	0.93	DangsuA,DangsuB	UGUUAACAUGCUUGGCGUGCCUGGCUCCCUGUAUGCCAUUUGCAGAGCCCAUCAGAACAGUGAUGGCUUUAACUAAUGGCGUGCGAGGAGUCAUGCAUGUUGUUAGUUAUUAGUUAA
pyr-299	UGCCUGGCUCCCUGUAUGCC	tae-MIR160	-61.90	0.74	DangsuA,DangsuB	AGAGGUGAAAACAAUGGGAUAUGCCUGGCUCCCUGUAUGCCACUCGCGUAGCUGCCAACUCCCCAAACCUUGCGUUGGCUCUACCGCGGAUGGCGUGCGAGGAGCCAAGCAUGACCGUCUCUCUCUCUCUCUCUCUCUCUCUCUCUCU
pyr-299	UGCCUGGCUCCCUGUAUGCC	bdi-MIR160f	-60.60	0.66	DangsuA,DangsuB	CGGGGGCUGCGGGGUGGCGGAUGUCAGUGUGCGGCCGUAGGCUGGACCGCGGGUGUUUGCUGUUGCGGAGAUCCACCGAGGACGGAGACGGACCGAAGUGCGCAUGCCUGGCUCCCUGUAUGCCGCCCGCG
pyr-299	UGCCUGGCUCCCUGUAUGCC	aqc-MIR160b	-46.80	1.14	DangsuA,DangsuB	UGCCUGGCUCCCUGUAUGCCAUUUGCUUAGUCCAUUUAGUAUUAGAUGGCCUUUGUGGAUGGCGUGCGAGGAGCCAUGCAUA
pyr-299	UGCCUGGCUCCCUGUAUGCC	bdi-MIR160b	-67.00	0.83	DangsuA,DangsuB	UCGAUCCGAAUUAAUCGAUCAUCGGCUGCGUGCCUGGCUCCCUGUAUGCCACACAUGUAGCCCGAUCCGUGCCGAGGUUGGAUGCUGUGGGUGGCGUGCAAGGAGCCAAGCAUGCAUACAUACAAGCUCCAUGAUCGAUCCAUCCA
pyr-299	UGCCUGGCUCCCUGUAUGCC	bdi-MIR160c	-59.10	0.82	DangsuA,DangsuB	UAAAUUGAUGAUCUGAUCAAGACUGUGCUGUGCCUGGCUCCCUGUAUGCCACACAUGUAGCCCAGCCCAUGAAUGUGGUUUGCCUGCUGUGGGUGGCGUGCAAGGAGCCAAGCAUGCAUUACGCAUUAUGAUCAAUUAAUCUCUGGUU
pyr-299	UGCCUGGCUCCCUGUAUGCC	bdi-MIR160a	-77.90	0.76	DangsuA,DangsuB	UGCGGAAGGAGGUGAAAAAAAAAAUGGGAUAUGCCUGGCUCCCUGUAUGCCACUCGCGUAGCUGCCAACAACUCAGUUUGAGCUCCCCCGGCCCAAACGCAAACGUUGGCUCUACCGCGGAUGGCGUGCGAGGAGCCAAGCAUGACCGUCUCUCCCCCUCCCUCCCUCUCUCCCU
pyr-299	UGCCUGGCUCCCUGUAUGCC	aly-MIR160a	-67.50	1.05	DangsuA,DangsuB	CGCCUAUACAUGUAUAUAGAUGUAUAUGUAUUAUAUAUGUAUGCCUGGCUCCCUGUAUGCCAUAUGCUGAGCUCAUCGAGUAUCGAUGACCUCCGUGGAUGGCGUAUGAGGAGCCAUGCAUAUCCUCAUACAUAUAUAUACAUAAUUAUGUGAUGGUG
pyr-299	UGCCUGGCUCCCUGUAUGCC	aly-MIR160c	-56.60	1.01	DangsuA,DangsuB	CAUAUAAUAGUUUGUCGUCGUUAUGCCUGGCUCCCUGUAUGCCACGAGUGGAUACCGAUUUUGUUAUAAAAUCGGCUGCCGGUGGCGUACAAGGAGCCAAGCAUGACCAUAAGCAUAUG
pyr-299	UGCCUGGCUCCCUGUAUGCC	aly-MIR160b	-48.90	1.02	DangsuA,DangsuB	UAUAUAUAGAUUUAAGGUCGUGCCUGGCUCCCUGUAUGCCACAAGAAAACAUCGAUUUAGUUACAAAAUCGAUCACUAGUGGCGUACAGAGUAGUCAAGCAUGACCAAAGCUUUCUUGAUAUAUA
pyr-299	UGCCUGGCUCCCUGUAUGCC	ttu-MIR160	-50.80	0.98	DangsuA,DangsuB	AUAUGAUGUGCCUGGCUCCCUGUAUGCCACUCAUCCAGAGCAACACCUUUUGCAAUAAGGUUGCCUGCGAUGGAUGGCGUGCACGGAUCCAAGCAUAUCG
pyr-299	UGCCUGGCUCCCUGUAUGCC	csi-MIR160	-59.10	1.06	DangsuA,DangsuB	AUUAUACCUAUGUCUAUAUAUUUAUAAUUAUGUGCCUGGCUCCCUGUAUGCCAUUUGCAGAGUCAAUCGAAACAUCGAUGGCCUCCGUGGAUGGCGUAUGAGGAGCCAUGCAUAUUCCAUGUAUAAUAUAUACCCAUAGAUAU
pyr-299	UGCCUGGCUCCCUGUAUGCC	tcc-MIR160b	-59.00	0.97	DangsuA,DangsuB	UGUUAAAUGCACAUUUUGUAUGCCUGGCUCCCUGUAUGCCAUUUGCAAAGCCCAUCAAGAGUCCGGUGGCCUUCGUGGAUGGCAUGCGAGGAGCCAUGCAUGCAUUCUGCUGUCUUAACG
pyr-299	UGCCUGGCUCCCUGUAUGCC	ata-MIR160a	-59.70	0.88	DangsuA,DangsuB	CAAUGGGAUAUGCCUGGCUCCCUGUAUGCCACUCGCGUAGCUGCCAACUCUCCAAACCCAGCGUUGGCUCUACCGCGGAUGGCGUGCGAGGAGCCAAGCAUGACCGUCUCUCU
pyr-299	UGCCUGGCUCCCUGUAUGCC	ata-MIR160c	-55.10	0.89	DangsuA,DangsuB	CGUGCUUGUGUGCCUGGCUCCCUGUAUGCCACUCAUGUAGCCCAACCCGCGGCGUGAUUGGAUGCUGUGGGUGGCGUGCAAGGAGCCAAGCAUGCGUACAUACA
pyr-299	UGCCUGGCUCCCUGUAUGCC	ata-MIR160b	-51.50	0.92	DangsuA,DangsuB	UGAUAUGAUGUGCCUGGCUCCCUGUAUGCCACUCAUCCAGAGCAACACCUUUUGCAAUAAGGUUGCCUGCGAUGGAUGGCGUGCACGGAUCCAAGCAUAUCGAACCC
pyr-299	UGCCUGGCUCCCUGUAUGCC	ptc-MIR160c	-49.60	0.97	DangsuA,DangsuB	AUAUUAUAUGUGCCUGGCUCCCUGUAUGCCAUUUGCAGAGCCCACCGGUUCUUCGAUGGCCUCCGUGGAUGGCGUAUGAGGAGCCAUGCAUAUUCACA
pyr-299	UGCCUGGCUCCCUGUAUGCC	nta-MIR160b	-48.30	0.88	DangsuA,DangsuB	GAUCUGCAUAUGCCUGGCUCCCUGUAUGCCAUUUGCAGAGCUCAUCGGAAUACCGUUGGGUCCCCGUGAAUGGCGUAUGAGGAGCCAAGCAUAUCCCCGAUAU
pyr-299	UGCCUGGCUCCCUGUAUGCC	nta-MIR160c	-54.40	0.95	DangsuA,DangsuB	AACUUGGAUGUGCCUGGCUCCCUGUAUGCCACACACUUUCACCAAUCCGCGAGUUCUUUGAUUGGCUGAUCAGUGGGUGGCGUGCGAGGAGCCAAGCAUACCACAUUAUA
pyr-299	UGCCUGGCUCCCUGUAUGCC	nta-MIR160a	-48.90	0.92	DangsuA,DangsuB	AAUAUGCAUAUGCCUGGCUCCCUGUAUGCCAUUUGCAGAGCUCAUCGGAAUACCGUUGGGUCCCCGUGAAUGGCGUAUGAGGAGCCAAGCAUAUCCCGGAUAU
pyr-299	UGCCUGGCUCCCUGUAUGCC	cpa-MIR160f	-45.00	0.92	DangsuA,DangsuB	UGCCUGGCUCCCUGUAUGCCAUUUGCAGAGCCCACCGAGCAUCGCUGGCCUCCGUGGAUGGCGUAUGAGGAGCCAUGCAUA
pyr-299	UGCCUGGCUCCCUGUAUGCC	cpa-MIR160e	-50.40	0.97	DangsuA,DangsuB	UGCCUGGCUCCCUGUAUGCCACAAGCACAACCCGAUCUUUCCGAUGAUUGGCCGGUGCCGGUGGCGUGCGAGGAGCCAAGCAUG
pyr-299	UGCCUGGCUCCCUGUAUGCC	cpa-MIR160c	-45.00	0.92	DangsuA,DangsuB	UGCCUGGCUCCCUGUAUGCCAUUUGCAGAGCCCACCGAGCAUCGCUGGCCUCCGUGGAUGGCGUAUGAGGAGCCAUGCAUA
pyr-299	UGCCUGGCUCCCUGUAUGCC	cpa-MIR160b	-50.40	0.97	DangsuA,DangsuB	UGCCUGGCUCCCUGUAUGCCACAAGCACAACCCGAUCUUUCCGAUGAUUGGCCGGUGCCGGUGGCGUGCGAGGAGCCAAGCAUG
pyr-299	UGCCUGGCUCCCUGUAUGCC	cpa-MIR160a	-50.40	0.99	DangsuA,DangsuB	UGCCUGGCUCCCUGUAUGCCAUCUGCAAAGCGCCCAUCAGGAGUGGUGGCCUUGGUGGAUGGCGUGCGAGGAGCCAUGCAUG
pyr-299	UGCCUGGCUCCCUGUAUGCC	bdi-MIR160d	-69.90	0.90	DangsuA,DangsuB	AGAGACGAAGGUGAAGCUUAUGUUGGGAUGUGCCUGGCUCCCUGUAUGCCACUCAUCUAUAGCAACAUUCCUUCCUGAUGAGGUUGCCUAGGAUGGAUGGCGUGCACGGAGCCAAGCAUAUCCCCCUUGAUCCCAACCGUCUCUUCUCAU
pyr-299	UGCCUGGCUCCCUGUAUGCC	vvi-MIR160c	-57.60	0.94	DangsuA,DangsuB	AAAUGGGUUGUGCCUGGCUCCCUGUAUGCCACACGUAGAGACCACUCCCUUUCCCGGAUUGGCUAUUUGCGGGUGGCGUGCGAGGAGCCAAGCAUACCCACCAUUC
pyr-299	UGCCUGGCUCCCUGUAUGCC	vvi-MIR160d	-49.50	0.88	DangsuA,DangsuB	CAUACUUACAUGCCUGGCUCCCUGUAUGCCAUUUGCAAAGUCCACCCGAGGAUUGGUAGCCUUCGCGGAUGGCGUGCGAGGAGCCAUGCAUGCAUCUUGCUU
pyr-299	UGCCUGGCUCCCUGUAUGCC	vvi-MIR160e	-48.70	0.87	DangsuA,DangsuB	UAAGCAUAUAUGCCUGGCUCCCUGUAUGCCAUUUGCAGAGCCCACCGGCACAUCGAUGGCCUUCGUGGAUGGCGUAUGAGGAGCCAUGCAUAUGCCCCAUCU
pyr-299	UGCCUGGCUCCCUGUAUGCC	zma-MIR160b	-62.30	0.88	DangsuA,DangsuB	CGAUCGGCUCGUGUCGUGUGUGCCUGGCUCCCUGUAUGCCACACAUGUAGCCAACCCGUGGCGUGAUUGGAUGCUGUGGGUGGCGUGCAAGGAGCCAAGCAUGCAUAACAGGCCAUGAUCA
pyr-299	UGCCUGGCUCCCUGUAUGCC	sly-MIR160a	-60.50	1.03	DangsuA,DangsuB	CAAGUCGUGUACACGUAUAUGCCUGGCUCCCUGUAUGCCAUUUGCAAAGCUCACCGUAAUAUAUCGAUGGGCCUUGUUGAAUGGCGUAUGAGGAGCCAAGCAUAUUCCGAUAUCGUGUAUAUGAUGUUG
pyr-299	UGCCUGGCUCCCUGUAUGCC	zma-MIR160c	-49.80	0.94	DangsuA,DangsuB	AGGAUGUGCCUGGCUCCCUGUAUGCCACUCAUCUAGAGCAACGACAGCUUGGUAGGGUUGCCUAUAAGAUGGAUGGCGUGCAUGGUGCCAAGCAUAUCUC
pyr-299	UGCCUGGCUCCCUGUAUGCC	ghr-MIR160	-48.30	0.93	DangsuA,DangsuB	CAUCCAUGUAUGUAUGUGCCUGGCUCCCUGUAUGCCAUUUGCAGAGCCCAUUGAACUUCGAUAGCCUCCGUGAAUGGCGUAUGAGGAGCCAUGCAUGUAUUCUAUGUAUU
pyr-299	UGCCUGGCUCCCUGUAUGCC	zma-MIR160e	-59.80	0.92	DangsuA,DangsuB	AGGGAAUAUGCCUGGCUCCCUGUAUGCCACUCGCACGGCUACCACACCCCGGUGGCCGCUGCGGCUGGCGUGCGAGGUGCCAAGCAUGGCCCCC
pyr-299	UGCCUGGCUCCCUGUAUGCC	zma-MIR160d	-68.90	0.81	DangsuA,DangsuB	GGCCAGGGGCGGGAUCGAUAUGCCUGGCUCCCUGUAUGCCACUCGCAUGGCUGCCAACUCAUCAUGCAUACACUGCUAGCUAGUCGUUGGCUCCACUGCGGAUGGCGUGCGUGGAGCCAAGCAUGACCGAUCAUCUCCUCCU
pyr-299	UGCCUGGCUCCCUGUAUGCC	zma-MIR160g	-43.10	0.88	DangsuA,DangsuB	AUGCCUGGCUCCCUGUAUGCCACACAUGUAGCCCAACCCGUGAUGUGAUUGGAUGCUGUGGGUGGCGUGCAAGGAGCCAAGCAUGU
pyr-299	UGCCUGGCUCCCUGUAUGCC	zma-MIR160f	-61.10	0.94	DangsuA,DangsuB	GAGGUGAAAGAUAGGGAAUAUGCCUGGCUCCCUGUAUGCCGCUCGCAUGGCUACCACCGCCUGUGGUCGUUGCGGCUGGCGUGCGAGGUGCCAGGCAUGUUUUAAUAAUUAUCUCC
pyr-299	UGCCUGGCUCCCUGUAUGCC	rco-MIR160a	-54.10	1.10	DangsuA,DangsuB	UUGUGUGCCUGGCUCCCUGUAUGCCAUUUGUGAAGUUCAUCAGAAGCUUGGUGGUCUCCGCAGAUGGCAUGCAAGGAGCCAUGCAUGCUGCU
pyr-299	UGCCUGGCUCCCUGUAUGCC	rco-MIR160b	-46.90	0.88	DangsuA,DangsuB	GGUUAUGCCUGGCUCCCUGUAUGCCACAAGCUAGAGUUCAUUCCCUUCCAUGGAUUGGCUAUUGCCGGUGGCGUGCGAGGAGCCAAGCAUACUCUC
pyr-299	UGCCUGGCUCCCUGUAUGCC	stu-MIR160b	-42.20	0.98	DangsuA,DangsuB	UGCCUGGCUCCCUGUAUGCCACACACUUUCACCAAUUCUUUGAUUGACUGAUCAGUGGGUGGCGUGCGAGGAGCCAAGCAUA
pyr-299	UGCCUGGCUCCCUGUAUGCC	stu-MIR160a	-43.20	1.03	DangsuA,DangsuB	UGCCUGGCUCCCUGUAUGCCAUUUGCAAAGCUCACCGUAAUAUAUCGAUGGGCCUUGUUGAAUGGCGUAUGAGGAGCCAAGCAUA
pyr-299	UGCCUGGCUCCCUGUAUGCC	htu-MIR160a	-36.70	0.71	DangsuA,DangsuB	GCAUGCCUGGCUCCCUGUAUGCCUCCUGCAGGAAAACAACUGCUGGGGGUAUGAGGGUUGACUGAAAAGGACGGUGGAAGGGCAAAACCGUCU
pyr-299	UGCCUGGCUCCCUGUAUGCC	bna-MIR160d	-44.50	1.06	DangsuA,DangsuB	GUCAUGCCUGGCUCCCUGUAUGCCACAAGUAAAUACCGAUCUCAUUAUGAAAUCGGACACUAGUGGCGUACAGAGUAGUCAAGCAUGAC
pyr-299	UGCCUGGCUCCCUGUAUGCC	bra-MIR160a	-55.10	1.02	DangsuA,DangsuB	UAUGUGUAGUUGUAUAAGAUGUGUAUGCCUGGCUCCCUGUAUGCCAUCCUCUAAGCUCAUCGACCAUUGAUGACCUCCGUGAAUGGCGUAUGAGGAGCCAUGCAUAUUUUCAUAUACAUUUACAUAC
pyr-299	UGCCUGGCUCCCUGUAUGCC	bna-MIR160a	-51.40	0.99	DangsuA,DangsuB	GUAGUUGUAUAAGAUGUGUAUGCCUGGCUCCCUGUAUGCCAUCCUCUAAGCUCAUCGACCAUUGAUGACCUCCGUGAAUGGCGUAUGAGGAGCCAUGCAUAUUUUCAUAUACAUUUACA
pyr-299	UGCCUGGCUCCCUGUAUGCC	bna-MIR160b	-46.70	1.17	DangsuA,DangsuB	UCAUGCCUGGCUCCCUGUAUGCCACAAGUAGAUAUUGAUUUUGGUUGAAAAAAUCAGCUGCCAGUGGCGUACAAGGAGUCAAGCAUGA
pyr-299	UGCCUGGCUCCCUGUAUGCC	bna-MIR160c	-48.30	0.86	DangsuA,DangsuB	GUGUGUGCUCUUAUGGUCGUGCCUGGCUCCCUGUAUGCCACAAGUAUAUACCGAUCUCGUUACGAAAUCUGUGGCUAGUGGCGUACAGAGUAGUCAAGCAUGACCAAAGCUUUUC
pyr-299	UGCCUGGCUCCCUGUAUGCC	cca-MIR160b	-47.80	1.00	DangsuA,DangsuB	AGCAUAUGCCUGGCUCCCUGUAUGCCAUUUGCAAAGCGUAUCGACAUAUCGAUGGUCUAUGUGGAUGGCGUAUGCGGAGCCAAGCAUGUUCCG
pyr-299	UGCCUGGCUCCCUGUAUGCC	sbi-MIR160a	-44.60	0.89	DangsuA,DangsuB	UGCCUGGCUCCCUGUAUGCCACACAUGUAGCCCAACCCAUAUGCUAAGGUUGCCUGCUGUGGGUGGCGUGCAAGGGGCCAAGCA
pyr-299	UGCCUGGCUCCCUGUAUGCC	sbi-MIR160c	-37.30	0.85	DangsuA,DangsuB	UGCCUGGCUCCCUGUAUGCCACUCAUCUAGAUCAACAACUACCUAUGGUUGCCUAUGAUGGUUGGCGUGCACGGUGCCAAGCA
pyr-299	UGCCUGGCUCCCUGUAUGCC	sbi-MIR160b	-42.40	0.85	DangsuA,DangsuB	UGCCUGGCUCCCUGUAUGCCACACAUGUAGCCCAACCCGUGGCGUGAUUGGAUGCUGUGGGUGGCGUGCAAGGAGCCAAGCA
pyr-299	UGCCUGGCUCCCUGUAUGCC	sbi-MIR160e	-53.00	0.85	DangsuA,DangsuB	UGCCUGGCUCCCUGUAUGCCACUCGCACGGCUACCACCCCAAGAUCAUCGAUCGAUCUCGGUGGCCGCUGCGGCUGGCGUGCGAGGUGCCAAGCA
pyr-299	UGCCUGGCUCCCUGUAUGCC	sbi-MIR160d	-48.60	0.87	DangsuA,DangsuB	UGCCUGGCUCCCUGUAUGCCACUCGCUUAGCUGCCAACAACUCAUACUACGUUGUUAACGACGUUGGCUCUACUGCGGAUGGCGUGCGAGGAGCCAAGCA
pyr-299	UGCCUGGCUCCCUGUAUGCC	mdm-MIR160a	-47.60	1.19	DangsuA,DangsuB	UAUGCCUGGCUCCCUGUAUGCCACAAGCAGAAGUUCAAUUUCUUGAUUGGCUAUUGUGGGUGGCGUACAAGGAGCCAAGCAUA
pyr-299	UGCCUGGCUCCCUGUAUGCC	gma-MIR160d	-42.60	0.97	DangsuA,DangsuB	UGCCUGGCUCCCUGUAUGCCAUUUGUAGACCCCAUUACAAAGGUGAUGGCCUUAGCAAAUGGCGUAUGAGGAGUCAUGCAUGCUGUGUUUU
pyr-299	UGCCUGGCUCCCUGUAUGCC	gma-MIR160e	-50.00	0.98	DangsuA,DangsuB	UACUUGGCGUGCCUGGCUCCCUGUAUGCCAUUUGCAGAGCCCAUCAGGACAGUGAUGGCCUUAACGAAUGGCGUGCGAGGAGCCAUGCAU
pyr-299	UGCCUGGCUCCCUGUAUGCC	gma-MIR160f	-51.10	1.09	DangsuA,DangsuB	UACAUUGUGUGCCUGGCUCCCUGUAUGCCAUUUGUAGACCCCAUCACAAUGGUGAUGGCCUUAUCAAAUGGCGUAUGAGGAGUCAUGCAUGCUGUGU
pyr-299	UGCCUGGCUCCCUGUAUGCC	gma-MIR160a	-50.00	0.96	DangsuA,DangsuB	CAUGCAUACAUAUGUGUAUGUGCCUGGCUCCCUGUAUGCCAUUUGUAGAGCUCAUCGAAGCAUCAAUGACCUUUGUGGAUGGCGUAUGAGGAGCCAAGCAUAUUUCAUAUACAUACAUG
pyr-299	UGCCUGGCUCCCUGUAUGCC	gma-MIR160b	-48.40	1.21	DangsuA,DangsuB	AUGUGUAUGUGCCUGGCUCCCUGUAUGCCAUUUGCAUAGUUCAUUGAGCAUCAAUGAUCUUUGUGAAUGGCGUAUGAGGAGCCAAGCAUA
pyr-299	UGCCUGGCUCCCUGUAUGCC	gma-MIR160c	-48.60	0.95	DangsuA,DangsuB	UGCCUGGCUCCCUGUAUGCCAUUUGCAGAGCCCAUCAGGACAGUGAUGGCCUUAACGAAUGGCGUGCGAGGAGCCAUGCAUGUUGUGCGUU
pyr-299	UGCCUGGCUCCCUGUAUGCC	ppt-MIR160e	-54.10	0.75	DangsuA,DangsuB	CUGCAGAAAUCAAUGGGGGAAACUGGCACUGCCUGGCUCCCUGUAUGCCACUUGCGAAUUUUGGCAAAACUUGUGGCAGGGUACGUAGCUGCCAUACAGGGAGUCAGACAGACCUUGCAUCUUCCCGGAUUCUCAUGA
pyr-299	UGCCUGGCUCCCUGUAUGCC	ppt-MIR160f	-67.50	0.83	DangsuA,DangsuB	GUUCAUGGUUGAACGGUGGGGAGUUGGACUGCCUGGCUCCCUGUAUGCCACCUGCGGGGCUUGUCAAAAUGAUUGCCAGGCUGCAUAGCUGGCAUCCAGGGAGCCAGACAGACCUUUCUCUUGCCUCAUCCGGGUCCC
pyr-299	UGCCUGGCUCCCUGUAUGCC	ppt-MIR160a	-56.50	0.94	DangsuA,DangsuB	GGAGUGGAACUGCCUGGCUCCCUGUAUGCCACCUGCGGGGCUUGCCAAAGUGAUUGUCGAGCUGCAUAGCUGGCAUCCAGGGAGCCAGACAGACCUCCU
pyr-299	UGCCUGGCUCCCUGUAUGCC	atr-MIR160	-74.30	0.84	DangsuA,DangsuB	UGUGAUGGUUUUUUGGAGAGACAAGGUGGAAAAGGUAAAUGGGGUUAUGCCUGGCUCCCUGUAUGCCACUCUUUAGAGUCCAAUCUGAGGGCUGAUCGGCUCAUGAGGGUGGCGUGCGAGGAGCCAAGCAUACUUUCUCUCUCUAGCAAUCGAUCUUUCUCUCUCUAGUAAUCUCUCUAUCUCA
pyr-299	UGCCUGGCUCCCUGUAUGCC	ppe-MIR160a	-77.40	0.97	DangsuA,DangsuB	UUGGACGUGAGGCUUGAAGUGAAAGGUGAAUUGGGUUAUGCCUGGCUCCCUGUAUGCCACAAGCGGAAGCUCAAUCUGGUUCUAGAUUGGCUACUGCGGGUGGCGUACGAGGAGCCAAGCAUACCCUCUAUCUUUAUCUCUCUCUCUCUCUCUUGUUCAA
pyr-299	UGCCUGGCUCCCUGUAUGCC	ppe-MIR160b	-65.60	0.96	DangsuA,DangsuB	UGAACAUACGCAUAGAUAUACAAAGUAUAUAUGUGCCUGGCUCCCUGUAUGCCAUUUGCAGAGUCCCACCGAACAUCGAUGGCCUCCGUGGAUGGCGUAUGAGGAGCCAUGCAUAUAAACCCAUGUGUUUCCUGUGUGUGUUUCA
pyr-299	UGCCUGGCUCCCUGUAUGCC	cme-MIR160a	-55.40	1.11	DangsuA,DangsuB	GUGUGUAUGUGCCUGGCUCCCUGUAUGCCAUUUGUAGAGCUCAUCAGAAUCCGAUGGGCCUCCGCAGAUGGCGUAUGAGGAGCCAUGCAUAUAUCUUAA
pyr-299	UGCCUGGCUCCCUGUAUGCC	cme-MIR160b	-44.80	0.81	DangsuA,DangsuB	CUUUCAAUAUGCCUGGCUCCCUGUAUGCCAUUUGUAGAGCGCUCACCGUCAUUCCCGAUGGCCUCCGCGCAUGGCGUAUGAGGAGCCAAGCAUAUCCAUAUC
pyr-299	UGCCUGGCUCCCUGUAUGCC	cme-MIR160c	-47.60	1.03	DangsuA,DangsuB	UCAUCGUAAUGCCUGGCUCCCUGUAUGCCAUUUGCAAAGCCCAUCAUCUAAAAAUAGGUGGCCUUCUCGAAUGGCAUGCAAGGAGCCAUGCAUGUAUAAAUU
pyr-299	UGCCUGGCUCCCUGUAUGCC	smo-MIR160b	-55.00	0.89	DangsuA,DangsuB	ACAAACAAUCCCUGCCUGGCUCCCUGUAUGCCACCUGAGAAGCCCACCGAAGUGUUUCGGCAGGAUUCCUAGCUGGCGUGCGGGGAGCCAUGCAGAGCUUCUCUCUUU
pyr-299	UGCCUGGCUCCCUGUAUGCC	smo-MIR160a	-57.90	1.02	DangsuA,DangsuB	AAAAUCACUCUGCCUGGCUCCCUGUAUGCCAUCUGGGGGGGAUUUAUCAGCUGACGAUGAUAAGCUCCAUAGCUGGCUUACGGGGAGCCACGCAGAGUUUCUCGCU
pyr-299	UGCCUGGCUCCCUGUAUGCC	mdm-MIR160b	-45.40	1.03	DangsuA,DangsuB	UUAUGCCUGGCUCCCUGUAUGCCACAAGCAGAAGUUCAAUCUGUUUCUCGAUUGGCUAUUGCGGGUGGCGUAUGAGGAGUCAAGCAUAG
pyr-299	UGCCUGGCUCCCUGUAUGCC	mdm-MIR160d	-45.40	1.03	DangsuA,DangsuB	UUAUGCCUGGCUCCCUGUAUGCCACAAGCAGAAGUUCAAUCUGUUUCUCGAUUGGCUAUUGCGGGUGGCGUAUGAGGAGUCAAGCAUAG
pyr-299	UGCCUGGCUCCCUGUAUGCC	lus-MIR160a	-88.80	1.12	DangsuA,DangsuB	AAUGGAACUGAAUGGAGUUGAUUACGGUUUGCCGUGCCUGGCUCCCUGUAUGCCAUCUGCAAGACCUCAUUAACAGAGUUUUGGUGGGGCUUGCUGGAUGGCGUACGAGGAGCCAUGCAUGCUUUUUUAAUUCUCAACCCACCAUCAACUCCAUCAGUUCCAUU
pyr-299	UGCCUGGCUCCCUGUAUGCC	lus-MIR160b	-64.20	0.87	DangsuA,DangsuB	GGUGGUGAGUUAGUGUGUAAUGUGUGUGCGUGCCUGGCUCCCUGUAUGCCAUUUGCAAGAGCUCAUCAACACAGUUUUGAUGGGGCUUGGUGGAUGGCGUACUGAGUAGCCAUGCAUGCCUAACUAUCAUUGCUCCAAAUCUAACUUCUCCAUU
pyr-299	UGCCUGGCUCCCUGUAUGCC	lus-MIR160e	-62.40	0.85	DangsuA,DangsuB	GGAUGGAUGAUGAACUGUGCAUGUGCCUGGCUCCCUGUAUGCCAUUCGCAGAGCUCCAACGGAUUCAUCCAUGGCCUCCGUGGAUGGCGUAUGAGGAGCCAUGCAUAUAUCUACCUACCUUUUCAUCUCAUCAUCCCUUUCC
pyr-299	UGCCUGGCUCCCUGUAUGCC	lus-MIR160d	-100.00	0.83	DangsuA,DangsuB	GCUAGCUAAGGUGGCGGUGGUGGGUGGUGGUGGUGGUGUUGAGUUGAGUGUGUAAUGGCUGUGUGUGCGUGCCUGGCUCCCUGUAUGCCAUUUGCAAGAGCUCAUCAACACAGUUUUGAUGGGGCUUGGUGGAUGGCGUACUGAGUAGCCAUGCAUGCUUAUAACUACCAUUAACUCCUCCAUUCAUUUAUCCCCAACCAACCAUUCCCUUCCUUCCUACUGGCACCAAUGCUGC
pyr-299	UGCCUGGCUCCCUGUAUGCC	lus-MIR160f	-66.00	0.90	DangsuA,DangsuB	AUGGAGAUGAUGGUGAAGUGUGCAUGUGCCUGGCUCCCUGUAUGCCAUUCGCAGAGCUCCACCGGAUUCAUCCAUGGCCUCCGUGGAUGGCGUAUGAGGAGCCAUGCAUAUAUCUAUACCUGUUUCAUCUCAUCCCUUUCCAU
pyr-299	UGCCUGGCUCCCUGUAUGCC	lus-MIR160i	-44.10	0.86	DangsuA,DangsuB	UAAAUGUGACGGGUUAUGCCUGGCUCCCUGUAUGCCACCGACAACCCUUCCAGUCUUUUUGUUUGAUUGAUAGUUGUCGUUGGCGUACACGGAAUCAAGCAUACCUAUUUCUUUUA
pyr-299	UGCCUGGCUCCCUGUAUGCC	lus-MIR160h	-65.30	0.97	DangsuA,DangsuB	GGUAGAGGGUGAAUUUGAGAAUAUGCCUGGCUCCCUGUAUGCCACAGGCAAACUCCCAAUCCCAAAUUGUUGGUUUUCUAUCAGAUUGGUUGUUGCUGGUGGCGUACAUGGAGUCAAGCAUGUAGUAUAUGCGCCCUCUUUC
pyr-299	UGCCUGGCUCCCUGUAUGCC	lus-MIR160j	-44.90	0.82	DangsuA,DangsuB	GAAUUGGGAUCUAAGAUUAUAGGAUAUGCCUGGCUCCCUGUAUGCCAUCGAAAACCCUUCCAAUUACUUACUGGAUUGGUAGUUGUUGUUGGCGUACACGGAAUCAAGCAUACCUCUUUCUUUUAAACCAUUUUC
pyr-299	UGCCUGGCUCCCUGUAUGCC	mes-MIR160h	-48.00	0.98	DangsuA,DangsuB	AUGUGCCUGGCUCCCUGUAUGCCAUUUGCAGAGCCCACCGGAGAAUCGAUGGCCUCCGUGGAUGGCGUAUGAGGAGCCAUGCAUAU
pyr-299	UGCCUGGCUCCCUGUAUGCC	mdm-MIR160e	-47.90	1.02	DangsuA,DangsuB	UAUGUGCCUGGCUCCCUGUAUGCCAUUUGCAGAGUUCCACCGAACAUCGAUGGCCUCCGUGGAUGGCGUAUGAGGAGCCAUGCAUAUA
pyr-299	UGCCUGGCUCCCUGUAUGCC	mes-MIR160a	-45.30	0.89	DangsuA,DangsuB	AUGCCUGGCUCCCUGUAUGCCACAAGCUAGAGUUCAAUCCCAUCAGUGGACUGGCUGUCGCCGGUGGCGUGCGAGGAGCCAAGCAU
pyr-299	UGCCUGGCUCCCUGUAUGCC	mes-MIR160b	-52.80	1.04	DangsuA,DangsuB	GUGCCUGGCUCCCUGUAUGCCACCUGCAAAGCUCAUCAAAAAGUUGGUGGCGGCCUCCGCAGGUGGCAUGCGAGGAGCCAUGCAU
pyr-299	UGCCUGGCUCCCUGUAUGCC	mes-MIR160c	-52.10	0.91	DangsuA,DangsuB	GGCUAUGCCUGGCUCCCUGUAUGCCGCAAGCUAGAGUUCAAUCCCCACUGUGGAUUGGCUGUUGCCGGUGGCGUGCGAGGAGCCAAGCAUACCC
pyr-299	UGCCUGGCUCCCUGUAUGCC	mes-MIR160d	-48.00	1.00	DangsuA,DangsuB	AUAUGCCUGGCUCCCUGUAUGCCAUUUGCAGAGCCCACCGGAGAAUCGAUGGCCUCCGUGGAUGGCGUAUGAGGAGCCAUGCAUAU
pyr-299	UGCCUGGCUCCCUGUAUGCC	mdm-MIR160c	-51.70	1.08	DangsuA,DangsuB	UAUGUGCCUGGCUCCCUGUAUGCCAUUUGCAGAGUCCCACCGAACAGCGAUGGCCUCUGUGGAUGGCGUAUGAGGAGCCAAGCAUAUA
pyr-299	UGCCUGGCUCCCUGUAUGCC	mes-MIR160g	-52.80	1.04	DangsuA,DangsuB	GUGUGCCUGGCUCCCUGUAUGCCAUCUGCAAAGCUCAUCAGAAAGUCGGUGGCCUCCGCAGAUGGCAUGCGAGGAGCCAUGCAUGC
pyr-1816	UUGUGUUCUCAGGUCACCCCU	tcc-MIR398b	-75.00	0.82	DangsuA,DangsuB	CAGCCAGAUGGUUUACCACGAAGGGGUGCCACCUAAGAACCCAGGCGGUUUGGCCUGAGCUAGGCCUUUGCCAAGCUGCUAUGAAAAGGAAGGCUGAAUGCUAAUGCAGCCAGCAGCAACCGGUUGUGUUCUCAGGUCACCCCUUCGCGGUACUUCUAUCUUCGC
pyr-1816	UUGUGUUCUCAGGUCACCCCU	vvi-MIR398a	-56.40	0.97	DangsuA,DangsuB	ACACCCCAAGGGAGUGGCACCUGAGAACACCGGUUGUGUUGGCUGCGCCAAGCUCUGCUAGCUAAUGCAUUUUGUGUUCUCAGGUCACCCCUUUGGGGCACCA
pyr-1816	UUGUGUUCUCAGGUCACCCCU	ghr-MIR398	-55.00	1.04	DangsuA,DangsuB	GCCAAGAUGGUUUACCCCAGAGGGGUGCCACCUAAGAACACAGGUCAUCCCUUAACCAAAUAGCUUGUGUUCUCAGGUCACCCCUUUGGGGUACAUAUAUCUUCGC
pyr-1816	UUGUGUUCUCAGGUCACCCCU	bdi-MIR398b	-73.20	0.92	DangsuA,DangsuB	GGAUGGGAUGCAAUUGAGGGAAGCUGAACCCACAGGAGUGUCACUGAGAACACAGGUGCAGAUGCCAAUGCAUGGUGAGUUUUCAUUUUUGCAUCGCAAUUGUGUUCUCAGGUCACCCCUUUGGGUUGCUUCCCUUGAUUCCAUGGCCAGGUUAUGUGUCAUG
pyr-1816	UUGUGUUCUCAGGUCACCCCU	ahy-MIR398	-69.50	1.26	DangsuA,DangsuB	UAUCUCAGAGGAGUGAACCUGAGAACACAAAGUAAAUUGUUUCGGAGUUUGGAAUGCCAUAAUCACAUGCAUAAUGCAUUUAUGCUUAUGCUUGUAUAUGGUACAUAUUUUCGAAUUUUAAUUUACCUUGUGUUCUCAGGUCACCCCUUUGAG
pyr-1816	UUGUGUUCUCAGGUCACCCCU	gma-MIR398b	-55.50	0.97	DangsuA,DangsuB	AGUCCAAAUGGUUUAUCUCAGAGGAGUGGAUCUGAGAACACAAGGCUGGUUUGCACUGCUAUAUUAUGAUCGAUUGGUAUAAGGUGAAUUUACUUUGUGUUCUCAGGUCACCCCUUUGAGCCAACCUGUUGACAU
pyr-1816	UUGUGUUCUCAGGUCACCCCU	csi-MIR398	-82.90	0.82	DangsuA,DangsuB	CAACAGAUGUGAAACCCCAGAGGAGUGAUCCUGAGAACAGAGGGUGGCGUUGGCUUAAAUUUGAUUUGCAUUGCUGCUGCCUGCUCCUGCCAUACAUUAAAUCAAAAAGAUUGUAUGUGGCCAACGCACCUUGUGUUCUCAGGUCACCCCUUUGGGAAUUCAAUUGUCAAUCAGCACGUGUCAUCAAGUUACUCAAUUGCUCUAACAUUCGCUGCUUCUGAUUCA
pyr-1816	UUGUGUUCUCAGGUCACCCCU	gma-MIR398a	-50.00	0.98	DangsuA,DangsuB	CUCGGAGGAGUGAAUCUGAGAACACAAGGCUGGUUUGCACUGCUAUAUCAUCUAUUGGUAUAAGGUGAAUUUACUUUGUGUUCUCAGGUCACCCCUUUGAGCCAACCUGUUGACAU
pyr-1816	UUGUGUUCUCAGGUCACCCCU	bol-MIR398a	-34.00	0.87	DangsuA,DangsuB	UCUCAAAGGAGUGUCAUGAGAACACGGAUCCUCUUGUUUCUUUAAGAUUUCCACUGAAACCAUUGAGUAUUGUGUUCUCAGGUCACCCCUUUGAA
pyr-1816	UUGUGUUCUCAGGUCACCCCU	cme-MIR398b	-47.60	0.90	DangsuA,DangsuB	CCCAAAGGAGUGAACCCGAGAACACAAGAUUGCAUUUGAGAUUUGCCCAAUUGAUUGAUUUUUGUUUGUUGGGAGGAUUAAUUCAACAUAUUGCUCUUUGUGUUCUCAGGUCACCCCUUUGGAGACAC
pyr-1816	UUGUGUUCUCAGGUCACCCCU	ath-MIR398a	-38.80	0.95	DangsuA,DangsuB	UGAAAUUUCAAAGGAGUGGCAUGUGAACACAUAUCCUAUGGUUUCUUCAAAUUUCCAUUGAAACCAUUGAGUUUUGUGUUCUCAGGUCACCCCUUUGAAUCUCCC
pyr-1816	UUGUGUUCUCAGGUCACCCCU	aly-MIR398a	-59.50	0.90	DangsuA,DangsuB	UAAUCAGUGGAAGUAAAGUAUGAAGAAAAAGAGAAGAACAACAGGAGGUGAAAUCUCAAAGGAGUGUCAUGAGAACACAGAUCCUAUGGUUUCUUUACAUUUUCAUUGAAACCAUUGAGUUUGUGUUCUCAGGUCACCCCUUUGAAUCUCCCCUGUUCCUUUAUUUUACCUUACCAAAAUUA
pyr-1816	UUGUGUUCUCAGGUCACCCCU	mtr-MIR398a	-48.80	1.36	DangsuA,DangsuB	UCUCAGAGGAGUGACACUGAGAACACAAGAUUGAUUAAUCAUAUAAUGUAUUUGGUUGUUACUAGUUGAUUUUGUGUUCUCAGGUCACCCCUUUGAGU
pyr-1816	UUGUGUUCUCAGGUCACCCCU	aqc-MIR398a	-42.80	0.97	DangsuA,DangsuB	CCUGGAGGAGUGGCACUAAGAACACAGGUGGUUGUGCGAUUUCGAAUAUCAUUGCAUUUUGCAUUUGUGUUCUCAGGUCACCCCUUUGGGGA
pyr-1816	UUGUGUUCUCAGGUCACCCCU	gra-MIR398	-55.40	0.92	DangsuA,DangsuB	GCCAAGAUGGUUUACCCCAGAGGGGUGCCACCUAAGAACACAGGUCAUCCCUUAACCAAAUAGCUUGUGUUCUCAGGUCACCCCUUUGGGGUACAUAUAUCUUCGCCAUUCCCUUUUGUUUGC
pyr-1609	UUUGGAUUGAAGGGAGCUCUG	bdi-MIR159b	-86.40	0.87	DangsuA,DangsuB	UGGUUUUGAGGUGGAGCUCCUAUCAUUCCAAUGAAAGGUCUGUCAGAAGGGUGAUACAGCUGCUUGUUCAUGGUUCCCACUUAUCCUAUCUCCAUUAGAAAGGAGGAGGUAGGCUUGUGGUUUGCAUGACCGAGGAGCCGCAUCCACCCCUUGCCGACCGCUGUUUGGAUUGAAGGGAGCUCUGCAUCUUGAUCUUUC
pyr-1609	UUUGGAUUGAAGGGAGCUCUG	zma-MIR159f	-92.40	0.78	DangsuA,DangsuB	GGAGCUCCUCUCAUUCCAAUGAAGGGUCCUUCCGAAGGGUGGUUCCGCUGCUCGUUCAUGGUUCCCACUAUCCUAUCUCAUCCAUGUUUGCGUGUCUUCGAGAGGAAGCGGAAGAGAUUCCUGUGGUCGCCUUUUGAGAUAGGCUUGUGGUUUGCAUGACCGAGGAGCUGCACCGACCCCGUGCUGGCCGCUCUUUGGAUUGAAGGGAGCUCUGC
pyr-1609	UUUGGAUUGAAGGGAGCUCUG	osa-MIR159b	-81.90	0.96	DangsuA,DangsuB	GGUUAUGAAGUGGAGCUCCUUUCGUUCCAAUGAAAGGUUUAUCUGAAGGGUGAUACAGCUGCUUGUUCAUGGUUCCCACUAUUCUAUCUCAUAGGAAAAGAGAUAGGCUUGUGGUUUGCAUGACCAAGGAGCCGAAUCAACUCCUUGCUGACCACUCUUUGGAUUGAAGGGAGCUCUGCAUCUUGAUC
pyr-1609	UUUGGAUUGAAGGGAGCUCUG	osa-MIR159a	-115.50	0.90	DangsuA,DangsuB	GUUGUGGACGUUGAGCUCCUUUCGGUCCAAAAAGGGGUGUUGCUGUGGGUCGAUUGAGCUGCUGGGUCAUGGAUCCCGUUAGCCUACUCCAUGUUCAUCAUUCAGCUCGAGAUCUGAAAGAAACUACUCCAAUUUAUACUAAUAGUAUGUGUGUAGAUAGGAAAAUGAUGGAGUACUCGUUGUUGGGAUAGGCUUAUGGCUUGCAUGCCCCAGGAGCUGCAUCAACCCUACAUGGACCCUCUUUGGAUUGAAGGGAGCUCUGCAUCUUUUGU
pyr-1609	UUUGGAUUGAAGGGAGCUCUG	ssp-MIR159a	-109.90	0.82	DangsuA,DangsuB	GAUGCUUGGAUUUGAAGCGGAGCUCCUAUCAUUCCAAUGAAGGGCCGUUCUGAAGGGUUGUUCCGCUGCUCGUUCAUGGUUCCCACUAUCCUAUCUCAUCAUGUAUGUGUGUAUGUAUUUUCGAGAGGGAGGAGAGGAGCUAGACUCUCAUGGUGGUCGUCUUUGAGAUAGGCUUGUGGUUUGCAUGACCGAGGAGCUGCACCGUCCCCUUGCUGGCCGCUCUUUGGAUUGAAGGGAGCUCUGCAUCCUGAUCCAUCCAUC
pyr-1609	UUUGGAUUGAAGGGAGCUCUG	zma-MIR159b	-104.10	0.89	DangsuA,DangsuB	UAGACGGUCUGGUCUUAAGGCGGUGCUCCCUUCAAACCAAUAAACGGUCGAUCUGAUGGGUGGUACAGCUGCUCGUUCAUGGUUCCCACUGUCCCAUCUCAUCAGAGAGAGAGAGAGAUGCUUGAGAUGGGCUUGUGGUUUGCAUGACCGAGGAGCUGCACGUCCCCUUCGUUGACCGCUGUUUGGAUUGAAGGGAGCUCUGCAUCUUGGUCCCAAGACUU
pyr-1609	UUUGGAUUGAAGGGAGCUCUG	zma-MIR159k	-87.50	0.83	DangsuA,DangsuB	GGUGCUCCCUUCAAACCAAUAAACGGUCGAUCUGAUGGGUGGUACAACUGCUCGUUCAUGGUUCCCACUGUCCCAUCUCAUCAGAGAGAGAGAAGAUCGUGAGAGAGCGAGAGAUGCUUGAGAUGGGCUUGUGGUUUGCAUGACCGAGGAGCUGCAUCGUCCCCUUCGUUGACCGCUGUUUGGAUUGAAGGGAGCUCUGC
pyr-1609	UUUGGAUUGAAGGGAGCUCUG	zma-MIR159j	-107.30	0.81	DangsuA,DangsuB	AGUUUGAUUCACUAGACCUGAUCCCCUAGACUAGACGGUCUGGUCUUAAGGCGGUGCUCCCUUCAAACCAAUAAACGGUCGAUCUGAUGGGUGGUACAGCUGCUCGUUCAUGGUUCCCACUGUCCCAUCUCAUCAGAGAGAGAGAAGAUCGUGAGAGAGCGAGAGAUGCUUGAGAUGGGCUUGUGGUUUGCAUGACCGAGGAGCUGCCUCGUCCCCUUCGUUGACCGCUGUUUGGAUUGAAGGGAGCUCUGC
pyr-1609	UUUGGAUUGAAGGGAGCUCUG	hvu-MIR159b	-31.30	0.55	DangsuA,DangsuB	CUGACCGCUGUUUGGAUUGAAGGGAGCUCUGCAUCUUGAUCUAUUACUAAUUAGUUUCCUCUUCCUUCUGCUGCAUGCAAGCCUGGAAAUCAUUUGUGGGGCCCUCUUAGAUCUAGCCAUGG
pyr-1609	UUUGGAUUGAAGGGAGCUCUG	hvu-MIR159a	-85.80	0.92	DangsuA,DangsuB	GGUGGAGCUCCUAUCAUUCCAAUGAAGGGUCUACCGGAAGGGUUUGUGCAGCUGCUUGUUCAUGGUUCCCACUAUCCUAUCUCCAUUAGAACACGAGGAGAUAGGCUUGUGGUUUGCAUGAUCGAGGAGCCGCUUCGAUCCCUCGCUGACCGCUGUUUGGAUUGAAGGGAGCUCUGCA
pyr-1609	UUUGGAUUGAAGGGAGCUCUG	sbi-MIR159a	-96.00	0.82	DangsuA,DangsuB	AGCGAAGCUCCUAUCAUUCCAAUGAAGGGCCCUUUUCAUGGGUGGUUCCGCUGCUCGUUCAUGGUUCCCACUAUCCUAUCUCAUCAUGUAUGUGUGUAUGUACUCUAGAGGGCCCGAGAAGAGAUUCAUGUGGUCGUCAGUCUUUGAGAUAGGCUUGUGGUUUGCAUGACCGAGGAGCUGCACCGUCCCCUUGCUGGCCGCUCUUUGGAUUGAAGGGAGCUCUGCA
pyr-1609	UUUGGAUUGAAGGGAGCUCUG	far-MIR159	-97.80	0.89	DangsuA,DangsuB	GUUUGGUUUUGAGGUGGAGCUCCUAUCAUUCCAAUGAAAGGUCUUGCUAGGAGGGGUGGUACAGCUGCUCGUUCAUGGUUCCCACUAUCCUACCUCCGUUUGAAACCAGGGAGAUAGGCCUGUGGCUAGCAUGACCGAGGAGCCGCAUCGUCCCCUCGCUGGCCGCUCUUUGGAUUGAAGGGAGCUCUGCAUCUUGGCCU
pyr-1609	UUUGGAUUGAAGGGAGCUCUG	tae-MIR159a	-82.80	0.87	DangsuA,DangsuB	GUGGAGCUCCUAUCAUUCCAAUGAAGGGUCUACCGGAAGGGUUUGUGCAGCUGCUCGUUCAUGGUUCCCACUAUCCUAUCUCCAUAGAAAACGAGGAGAGAGGCCUGUGGUUUGCAUGACCGAGGAGCCGCUUCGAUCCCUCGCUGACCGCUGUUUGGAUUGAAGGGAGCUCUGCAU
pyr-1609	UUUGGAUUGAAGGGAGCUCUG	sof-MIR159a	-110.90	0.81	DangsuA,DangsuB	CCUGAUGCUUGGAUUUGAAGCGGAGCUCCUAUCAUUCCAAUGAAGGGCCGUUCUGAAGGGUUGUUCCGCUGCUCGUUCAUGGUUCCCACUAUCCUAUCUCAUCAUGUAUGUGUGUAUGUAUUUUCGAGAGGGAGGAGAGGAGCUAGACUCUCAUGGUGGUCGUCUUUGAGAUAGGCUUGUGGUUUGCAUGACCGAGGAGCUGCACCGUCCCCUUGCUGGCCGCUCUUUGGAUUGAAGGGAGCUCUGCAUCCUGAUCCAUCCAUCC
pyr-1609	UUUGGAUUGAAGGGAGCUCUG	zma-MIR159a	-107.30	0.82	DangsuA,DangsuB	UCGAUGCUUUGGGUUUGAAGCGGAGCUCCUAUCAUUCCAAUGAAGGGUCGUUCCGAAGGGCUGGUUCCGCUGCUCGUUCAUGGUUCCCACUAUCCUAUCUCAUCAUGUGUAUAUAUGUAAUCCAUGGGGGAGGGUUUCUCUCGUCUUUGAGAUAGGCUUGUGGUUUGCAUGACCGAGGAGCUGCACCGCCCCCUUGCUGGCCGCUCUUUGGAUUGAAGGGAGCUCUGCAUCCUGAUCCACCCCUCC
pyr-1609	UUUGGAUUGAAGGGAGCUCUG	sof-MIR159b	-111.60	0.80	DangsuA,DangsuB	CCUGAUGCUUGGAUUUGAAGCGGAGCUCCUAUCAUUCCAAUGAAGGGCCGUUCUGAAGGGUGGUUCCGCUGCUCGUUCAUGGUUCCCACUAUCCUAUCUCAUCAUGUAUGUGUGUAUGUAUUUUCGGAGAGGGAGGAGAGGAGCUAGACUCUCACGGUGGUCGUCUUUGAGAUAGGCUUGUGGUUUGCAUGACCGAGGAGCUGCACCGUCCCCUUGCUGGCCGCUCUUUGGAUUGAAGGGAGCUCUGCAUCCUGAACCAUCCAUCC
pyr-1609	UUUGGAUUGAAGGGAGCUCUG	sof-MIR159d	-105.70	0.77	DangsuA,DangsuB	CCUGAUGCUUGGAUUUGAAGCGGAGCUCCUAUCAUUCCAAUGAAGGGCCGUUCUGAAGGGUUGUUCCGCUGCUCGUUCAUGGUUCCCACUAUCCUAUCUCAUCAUGUAUGUGUGUAUGUAUUUUCGAGAGGGAGGAGAGGAGCUAGACUCUCAUGGGGGUCGUCUAUGAGAUACGCUUGUGGUUUGCAUGACCGAUGAGCUGCACCGUCCCCUUGCUGGCCGCUCUUUGGAUUGAAGGGAGCUCUGCAUCCUGAUCCAUCCAUCC
pyr-1609	UUUGGAUUGAAGGGAGCUCUG	tae-MIR159b	-111.30	0.92	DangsuA,DangsuB	GAGCUCCUUUCGGUCCAAAAAGGGGUGUUGCUGUGGGUCGAUUGAGCUGCUGGGUCAUGGAUCCCGUUAGCCUACUCCAUGUUCAUCAUUCAGCUCGAGAUCUGAAAGAAACUACUCCAAUUUAUACUAAUAGUAUGUGUGUAGAUAGGAAAAUGAUGGAGUACUCGUUGUUGGGAUAGGCUUAUGGCUUGCAUGCCCCAGGAGCUGCAUCAACCCUACAUGGACCCUCUUUGGAUUGAAGGGAGCUCUGCAUCU
pyr-1600	UUUGGAUUGAAGGGAGCUCUU	ath-MIR159b	-85.30	1.08	DangsuA,DangsuB	GGAAGAGCUCCUUGAAGUUCAAUGGAGGGUUUAGCAGGGUGAAGUAAAGCUGCUAAGCUAUGGAUCCCAUAAGCCUUAUCAAAUUCAAUAUAAUUGAUGAUAAGGUUUUUUUUAUGGAUGCCAUAUCUCAGGAGCUUUCACUUACCCCUUUAAUGGCUUCACUCUUCUUUGGAUUGAAGGGAGCUCUUCAUCUCUC
pyr-1600	UUUGGAUUGAAGGGAGCUCUU	aly-MIR159b	-85.60	1.04	DangsuA,DangsuB	GGAAGAAGAAGAGGAAGAGCUCCUUGAAGUUCAAUGGAGGGUUUAGCAGGGUAAAGUAAAGCUGCUAAGCUAUGGAUCCCAUAAACCUUAUCAAAUUCAAAAUAAGGAUUUUUUAUGGAUUCCAUAUCUCAGGAGCUUUCACUUACCCCUUUAAUGGCUUCACUCUUCUUUGGAUUGAAGGGAGCUCUUCAUCUCUACCUCC
pyr-1600	UUUGGAUUGAAGGGAGCUCUU	lus-MIR159c	-101.00	1.01	DangsuA,DangsuB	GAGAGAUAAAAAGAGGGAGAGCUCCUUUGGGUCCAAACAGAGGGUGUGGAUAGGGUGAAACGGAAGCUGCUGAGCUAUGGAUUCCACAGCCACCCCCGUAUCUUAAAUAAUUGGGGUGGUUGUGGCUCGUUUUGCAUAUCUCAGGAGCCUCCGUUCCCUGUUUUCUUUUCUUCCCUCCUUUGGAUUGAAGGGAGCUCUUCAUUUCUU
pyr-1427	UGCCUGGCUCCCUGUAUGCCG	bdi-MIR160f	-60.60	0.66	DangsuA,DangsuB	CGGGGGCUGCGGGGUGGCGGAUGUCAGUGUGCGGCCGUAGGCUGGACCGCGGGUGUUUGCUGUUGCGGAGAUCCACCGAGGACGGAGACGGACCGAAGUGCGCAUGCCUGGCUCCCUGUAUGCCGCCCGCG
pyr-1427	UGCCUGGCUCCCUGUAUGCCG	zma-MIR160f	-61.10	0.94	DangsuA,DangsuB	GAGGUGAAAGAUAGGGAAUAUGCCUGGCUCCCUGUAUGCCGCUCGCAUGGCUACCACCGCCUGUGGUCGUUGCGGCUGGCGUGCGAGGUGCCAGGCAUGUUUUAAUAAUUAUCUCC
pyr-1427	UGCCUGGCUCCCUGUAUGCCG	mes-MIR160c	-52.10	0.91	DangsuA,DangsuB	GGCUAUGCCUGGCUCCCUGUAUGCCGCAAGCUAGAGUUCAAUCCCCACUGUGGAUUGGCUGUUGCCGGUGGCGUGCGAGGAGCCAAGCAUACCC
pyr-1427	UGCCUGGCUCCCUGUAUGCCG	osa-MIR160e	-58.90	0.84	DangsuA,DangsuB	GUAGGGGAUAUGCCUGGCUCCCUGUAUGCCGCUCGCAUGGCUGCCAACCCAAUGAACUCGAUCUCGUUGUUGGCCGCUGCGUACGGCGUGCGAGGUGCCAAGCAUGGCCCUCUU
pyr-4527	AUCAUGCGAUCUCUUCGGAAU	stu-MIR393	-38.20	1.12	DangsuA,DangsuB	UCCAAAGGGAUCGCAUUGAUCCUGUGUCCCAAAUUAAUUAACUGGGGUCUAUGGGAUCAUGCGAUCUCUUCGGAAU
pyr-1043	CUUGGACUGAAGGGAGCUCC	ptc-MIR319a	-77.00	0.97	DangsuA,DangsuB	UAAUAGCUAAGAGAGCUUUCUUCAGUCCACUCAUGGGUGGUAGUAGGAUUUAAUUAGCUGCCGACUCAUUCAUCCAAAUACUGAGUUAAAGGACAAGGAGAUUACCCAGUAAAUGAGUGAAUGAUGCGGGAGACAAAUUGAAUCCUAAGCUUCCUGUACUUGGACUGAAGGGAGCUCCCUUUCCUUUU
pyr-1043	CUUGGACUGAAGGGAGCUCC	lus-MIR319a	-74.00	1.04	DangsuA,DangsuB	AGAGAGCUUUCUUCAGUCCACUCAUGGGUGGCAAUAAGGAUUUAAUUAGCUGCCGACUCAUUCAUCCAAAUACUGUGUGUAGUAUAUUUAAUCAGCAUGGUAAAUGAGUGAAUGAUGCGGGAGACAAAUUGAAUCUUAAGCUUCCUGUACUUGGACUGAAGGGAGCUCCCU
pyr-1043	CUUGGACUGAAGGGAGCUCC	pvu-MIR319c	-187.70	0.67	DangsuA,DangsuB	AUUUUUUCCAUGGUCACUCUCAUUACAACCUGCUAGUCCUUUUUCGUCUUUACGGUUUUCCUUUCUUUAUAACUCUGCUUGCUACUCUUGCAUCUCUUCAGCGCAGGAAUCGAUAAAAACAUGCCAGAAUUAGGGUUUCUGGUAGCCAUGCUUUUCAGUUUUAGCUCUAAGGAAGAAGGGAAAAGGAUGUACAUGUGCAGAGUUCGACUACAGCUUUAGUCACAUUGGGAAGGAAAGAGAGUGAAGGAGCUUCCCUCAGCCCAUUCAUGGAUACAAAAGAUUGGGUUGCAAAAUUAACCACUAACUCAUUCACACAAUAGUAUUCAGUUAGGGUGAUGCUCUUUUUGCUAUAAUAUGAUUGUGUGAAUGAAGUGAUGCAUACAUAUUGUGUGACCCUCU…
pyr-1043	CUUGGACUGAAGGGAGCUCC	ppt-MIR319b	-84.20	1.00	DangsuA,DangsuB	GAGCUCUUUUCAGUCCAGUAGCAGCUAAUGUCGAAGGUUGUACCGCUGCCGACUCAAACUUCCGGCUUCCAUAUCACGACGCGUGAUAUGGAAUCCGAAGGUCUGAUCCGGGAGCUGAUCGAUCUCCAGGUUAGCAUCUCUUGGACUGAAGGGAGCUCCU
pyr-1043	CUUGGACUGAAGGGAGCUCC	rco-MIR319c	-78.10	0.95	DangsuA,DangsuB	UUAAGAGAGCUCUCUUCAGUCCACUCAUGGGCGGGCGAAGGUUUUGAAUUAUCUGCCGACUCAUUCAUUCAAACACACUAGAAAAGGGAGCAUUAAAGAUAGCUGCUAUUGUGAAUGUGUGAAUGAUGCGGGAGAUAAAUUUCAUACUUCUCUUCUCUGUGCUUGGACUGAAGGGAGCUCCCUUUAGC
pyr-1043	CUUGGACUGAAGGGAGCUCC	vun-MIR319b	-92.30	0.98	DangsuA,DangsuB	UUGGGAAGGAAAGAGAGUGAAGGAGCUUCCCUCAGCCCAUUCAUGGACACAGAAUAAGAUUGGGUUGCAAAAUUAACCACUAAUUGAUUCACACAAUAGUAUUGAGUUAGGGUGAUGCUGUUUUUGCUGUGAUAUGAUUGUGUGAAUGAAGUGGUGCAUAUAUAUUGUGACCCUCUUUCUCUGUGCUUGGACUGAAGGGAGCUCCUUCUUUCUGUUGCCUCCU
pyr-1043	CUUGGACUGAAGGGAGCUCC	nta-MIR319a	-87.10	1.02	DangsuA,DangsuB	AGUUAUGAAGAGAGCUUUCUUCGGUCCACACAUAGGAGGUGAUAAGGUUCAAUUUGCUGCCGACUCAUUCAUCCAAAUGCUGAGGUUAGAUAGUCGAAAGCACCUCAGUAGCUGAAUGAAUGAAGCGGGAGUACAAGUUGAGUCUUAAGUUUCCUGUGCUUGGACUGAAGGGAGCUCCCUCUUACAAUC
pyr-1043	CUUGGACUGAAGGGAGCUCC	sly-MIR319a	-76.20	0.94	DangsuA,DangsuB	GAGCUUCUUUAGUCCACACAUGGGGAACGAUAGGGUUCAAUUUGCUGCCGACUCAUUCAUCCAAAUGUUGAGGUCUUGAUAAUCGAGUGCCACCUCAGCAACUGAGUGAAUGAAGCGGGAGUACAAGUUGAGUCUUGAGCUUCCUGUACUUGGACUGAAGGGAGCUCC
pyr-1043	CUUGGACUGAAGGGAGCUCC	mdm-MIR319b	-84.30	1.00	DangsuA,DangsuB	GCAGUGGUGAAGAGAGCUUUCUUCAGUCCACUCAUGGGUGGCGGUAGGAUUUAAUUAGCUGCCGAGUCAUUCAUCCAAAUACUGGGUUAUUAGUAGGAUGACAUCCAGUAAAUGUGUGAAUGAAGCGGGAGACAAAUUGGAUCUUAAGCUUCCUGUACUUGGACUGAAGGGAGCUCCCUUAAUUAAUUACUUC
pyr-1043	CUUGGACUGAAGGGAGCUCC	mdm-MIR319a	-83.90	0.96	DangsuA,DangsuB	GCAGUGGUGAAGAGAGCUUUCUUUAGUCCAUUCAUGGGUGGCGACAGGAUUUAAUUAGCUGCCGAGUCAUUCAUCCAAAUACUGGGUUAUUAGCUCAGGACGACACCCAGUAAAUGUGUGAAUGAAGCGGGAGACAAAUUGGAUCUUGAGCUUCCUGUACUUGGACUGAAGGGAGCUCCCUUAAUUAAUUACUUC
pyr-1043	CUUGGACUGAAGGGAGCUCC	aau-MIR319	-83.00	1.02	DangsuA,DangsuB	AACAGUUUAAGAGAGCUUCCUUCAGUCCACUCAUGGAAGGGUAAGGGGUUUGAAUUAGCUGCUGACUCAUUCAUUCAAACACAAUAGAACACAGGUUUCUUCAAUACAGGCUAUUGUGAAUGUGUGAAUGAUGCAGGAGGUAAAUUUCAUCCUUUUCUUGUCUUUGCUUGGACUGAAGGGAGCUCCCUUUCACUGUU
pyr-1043	CUUGGACUGAAGGGAGCUCC	bdi-MIR319a	-127.90	0.97	DangsuA,DangsuB	UUAUAGCAGAAGGAGGAGGAGGUAUUCAUUUGAGGGAGCUUUCUUCUGUCCACCCAUGGGAGGUAGCGGGGAUUGAACGAGCUGCCGACUCAUUCACUCGAACACACAGUGGAUAACUGGAUAUGCAGACUAAUCCAAGGCAUAAUAUCUACUAGUGUGGAAUAAUAUCUACUGUGUGAAUGAGCGAAUGAAGCGGGAGAUUGUUCUCUCUUUCCUCCUCCAUGCUUGGACUGAAGGGAGCUCCCUCACCUCUCAUCACUUUCUCCCUCUUCUCCUUGAU
pyr-1043	CUUGGACUGAAGGGAGCUCC	ppt-MIR319e	-87.30	0.93	DangsuA,DangsuB	CUAGCCGUGGGAGCUCCUUCCGGUUCAAUAGUGGCUGAUGUGAGGUUGCACUGCUGCCGAUUCAAACUUCCGGCUUCCCUUUCUUAACACGACAGGGAAUCCGAAUGUCUGAUGCGGGAGCUGUGCGGUCUUCAACUUUAGCGCCUCUUGGACUGAAGGGAGCUCCCAAGUCUU
pyr-1043	CUUGGACUGAAGGGAGCUCC	ppt-MIR319d	-93.50	0.99	DangsuA,DangsuB	CAGCGUGGAGCUUUCUUCGGUCCAAUAGUGGCUGAGUCGAAGGUUGUGCUGCUGCCGACUCAAACUUCCGGCUUCCCUAUCCAACCCCUGGUAUGGAAUCCGAAUGUCUGAUACGGGAGCUGUUCAAUCUCCGGCUUAGCAUCUCUUGGACUGAAGGGAGCUCCCCGCUG
pyr-1043	CUUGGACUGAAGGGAGCUCC	ppt-MIR319c	-99.10	1.00	DangsuA,DangsuB	UAACCUCACUGGCUGUGGGAGCUUCCUUCGGUUCAAUAGUGGCUGAUAUGAGGUUGCACUGCUGCCGACUCAAACUUCCGGCUUCCCUCUCUUAGAAUGGCAGGGAAUCCGAAUGUCUGAUGCGGGAGCUGAGCGGUCUUCAACUCAGCUUCUCUUGGACUGAAGGGAGCUCCCAUGUCUUUGUGGUUA
pyr-1043	CUUGGACUGAAGGGAGCUCC	aly-MIR319b	-91.30	1.03	DangsuA,DangsuB	AAAUGUUAAUAUGGUUAUAGAUGUUGAGUUGGUGAAGGAAGAGAGCUUUCUUCGGUCCACUCAUGGAGUAAUAUGUGAGAUUUAAUUGACUCUCGACUCAUUCAUCCAAAUACCAAAUGAAAGAACAUGUUCUCAUAUGGUAAAUGAAUGAAUGAUGCGAGAGACAAAUUGAGUCUUCACUUCUCUAUGCUUGGACUGAAGGGAGCUCCCUAUUUUUAUUUUUUCUCGGUCGUACACAUUUCAUUU
pyr-1043	CUUGGACUGAAGGGAGCUCC	ppt-MIR319a	-98.70	0.92	DangsuA,DangsuB	GUGGAGCUCCGUUUCGGUCCAAUAGUGGCUGCGACGGAAGGUGGUCCCGCUGCCGAAUCACACGUCCGGGUUGCUUAUCGGGGCAGGGCCCCGAUACGGUAUCCGAACGUUUGUCCCGGGAACUGGUCGACCUUCCGCCCGGCGUCUCUUGGACUGAAGGGAGCUCCAC
pyr-1043	CUUGGACUGAAGGGAGCUCC	gma-MIR319q	-72.50	1.04	DangsuA,DangsuB	GAGAGUGAAGGAGUUUCCCUCAGCCCAUUCAUGGAUAUAAUGAAAGAUUGGGUUGCUGAAUUAACUGAUUCAUUCAUACAAUAGUAUUCAAUUAGGGUAAUAUUGUGUGAAUGAAGAGAGUAUAGUAUCUAUAUUGGAACCCCCUCUUUCUCUGUGCUUGGACUGAAGGGAGCUCCUUCUUUUU
pyr-1043	CUUGGACUGAAGGGAGCUCC	vvi-MIR319b	-100.20	1.04	DangsuA,DangsuB	UGUGGAAGAAGGAGCUCUCUUUAGUCCAGUCCGAGACAGCUUCAAGGCUGAUACGUGGCUGCUGACUCGUUGCUUCAAGAACUCAUCACAUAGGCCUGGAAAAGAUGGAUGGUUUUUUGAUCCAACGAUGCAGGAGCUGCGUUCAGUUAUGGCUGUCACGUCUUGGACUGAAGGGAGCUCCCUUGUAUUCCACA
pyr-1043	CUUGGACUGAAGGGAGCUCC	vun-MIR319a	-80.50	0.98	DangsuA,DangsuB	CUUAACAAAUGUAGGUAAGUGAGCUUUCUUCAGUCCACUCAUAGGUGGCAGUAAGAUUCAAUUAGCUGCCGACUCAUUCAUCCAAAUGCUGAGUAGUGAUACUCUUAAAGAUACUCAUCAAAUGAGUGAAUGAUGCGGGAGACAAAUUGAUUCUUAAGUUUCCUGUACUUGGACUGAAGGGAGCUCCCUUUUCCUUUCUAUGUAAGA
pyr-1043	CUUGGACUGAAGGGAGCUCC	gma-MIR319m	-83.50	1.03	DangsuA,DangsuB	AUAGUUUAAGAGAGCUUCCUUCAGUCCACUCAUGGAUGGAUAGAGGGUUUGAAUUAGCUGCUGACUCAUUCAUUCAAACACAAUAGAACGGGUGUCAUGGUAUGCUAUUGUGAAUGCCUGAAUGAUGCAGGAGGUAAAGUUCAUCCUUUUCUUGUCUGUGCUUGGACUGAAGGGAGCUCCCUUUUACUGU
pyr-1043	CUUGGACUGAAGGGAGCUCC	gma-MIR319j	-75.00	1.09	DangsuA,DangsuB	AGGUAAGAGAGCUCUCUUCAGCCCACUCAUAGGUGAUAAUAGGAUUUAAUUAGCUGCCGACUCAUUCAUACACAUGCUGAGUGAAUUAAUGAAUAAUACUCAGUAAAUGAGUGAAUGAUACGGGAGACAAAUUGAAUCUUAUGUUUUCUGUACUUGGACUGAAGGGAGCUCCCUUUUCU
pyr-1043	CUUGGACUGAAGGGAGCUCC	gma-MIR319k	-83.90	1.12	DangsuA,DangsuB	AGUUUAAGAGAGCUUCCUUCAGUCCACUCAUGGAUGGGUAGAGGGUUUGAAUUAGCUGCUGACUCAUUCAUUCAAACACAAUAGAAUUAGUAUCAUGGUAUGCUAUUGUGAAUGUGUGAAUGAUGCAGGAGGUAAAGUUCAUCCUUUUCUUGUCUUUGCUUGGACUGAAGGGAGCUCCCUUUUACU
pyr-1043	CUUGGACUGAAGGGAGCUCC	gma-MIR319h	-86.90	1.10	DangsuA,DangsuB	AGUUGAAGAGAGCUUCCUUCAGUCCACUCAUGGAUGGGAAAGGGGUUUGAAUUAGCUGCUGACUCAUUCAUUCAAACACAAUAGAUUCGGCUUCAUGAUAUGUUAUUGUGAAUGUGUGAAUGAUGCGGGAGGUAAAUUUCUUCCUUUUCUUGUCCUUGCUUGGACUGAAGGGAGCUCCCUCUAACU
pyr-1043	CUUGGACUGAAGGGAGCUCC	vvi-MIR319c	-83.20	1.01	DangsuA,DangsuB	UUACAUUGAAGAGAGCUUUCUUCAGUCCACUCAUGGGUGGCAGUAGGAUUGAAUUAGCUGCCGACUCAUUCAUCCAAAUACUGUGUUAAGGACUACCCAGUAAAUGAUUGAAUGAUGCGGGAGACAAAUUGGAUCUUAAGCUCCCUGUGCUUGGACUGAAGGGAGCUCCCUUCACUGCAAUC
pyr-1043	CUUGGACUGAAGGGAGCUCC	gma-MIR319g	-83.80	1.07	DangsuA,DangsuB	GGGAAAGAGAGUGAAGGAGUUUCCCUCAGCCCAUUCAUGGAUAUAAUGAAAGAUUGGGUUGCUGAAUUAACUGAUUCAUUCAUACAAUAGUAUUCAAUUAGGGUAAUAUUGUGUGAAUGAAGAGAGUAUAGUAUCUAUAUUGGAACCCCCUCUUUCUCUGUGCUUGGACUGAAGGGAGCUCCUUCUUUUUCUGUUCCC
pyr-1043	CUUGGACUGAAGGGAGCUCC	gma-MIR319e	-90.70	1.11	DangsuA,DangsuB	AUAGUUGAAGAGAGCUUCCUUCAGUCCACUCAUGGAUGGGUAAGGGGUUAGAAUUAGCUGCUGACUCAUUCAUUCAAACACAAUAGAUCUGGCAUCAUGAUAUGCUAUUGUGAAUGUGUGAAUGAUGCGGGAGGUAAAUUUCUUCCUUUUCCUGUCUGUGCUUGGACUGAAGGGAGCUCCCUCUAACUGU
pyr-1043	CUUGGACUGAAGGGAGCUCC	gma-MIR319b	-81.10	0.95	DangsuA,DangsuB	UAAGUCCUAAGCGACGGUAAGAGAGCUUUCUUCAGUCCACUUAUGGGUGACAAUAAGAUUUCAAUUAGCUGCCGACUCAUUCAUCCAAAUGCUGAGUGAAAGCGAAGAAAGAUACUCAGCAAAUGAGUGAAUGAUGCGGGAGACAAAUUGAUUCUUAAGUUUCCUGUACUUGGACUGAAGGGAGCUCCCUUUUUCUUUUGAAUCUUCU
pyr-1043	CUUGGACUGAAGGGAGCUCC	gma-MIR319a	-92.70	1.07	DangsuA,DangsuB	CGUUGAAGACCCUAAGGUAAGAGAGCUUUCUUCAGUCCACUCAUGGGUGACAGUAAGAUUCAAUUAGCUGCCGACUCAUUCAUCCAAAUGUUGAGUGUAAGCGAAUAAAUAUACUCAGCAGAUGAGUGAAUGAUGCGGGAGACAAAUUGAAUCUUAAGUUUCCUGUACUUGGACUGAAGGGAGCUCCCUUUUCCUUUUGUCUCUUAC
pyr-1043	CUUGGACUGAAGGGAGCUCC	aqc-MIR319	-75.90	1.04	DangsuA,DangsuB	AGAGAGCUCUCUUCAGUCCACUCAUAGGUAGUAGUCAGAUUCAAUUUGCUGCCGACUCAUUCAUCCAUGUACCCAAGUUAGUAAGAUGGUCAUAUAUUACUUGGUAAAUGAAUGAAUGAUCCGGGAGAUUAAUUGGAUCUUAUGCUUCUUGUACUUGGACUGAAGGGAGCUCCCUAC
pyr-1043	CUUGGACUGAAGGGAGCUCC	mes-MIR319h	-79.30	0.96	DangsuA,DangsuB	GAGAGAGCUUCCUUCAGCCCACUCAUGGAUGGGGUUAAAGGGGCUGAACUAUCUGCCGACUCAUUCAUUUGAGCACUAGUAGACAAAGAGUUACUAUUUUAGCUACUGUGGUUGUGUGAAUGAUGCGGGAGAUAAUUUUGCAUCCCUCUUUUUCUGUGCUUGGACUGAAGGGAGCUCCUC
pyr-1043	CUUGGACUGAAGGGAGCUCC	ptc-MIR319c	-81.80	0.95	DangsuA,DangsuB	AAUGGUUUAAGAGAGCUUUCUUCAGUCCACUCAUGGACGGGCGAAGGGUUUGGAUUAGCUGCCGACUCAUUCAUUCAAACACAGUAGAAAUUAAGGGAGCAGUAUGGCUGCUAUUGUGAAUGUGUGAAUGAUGCGGGAGAUAAAUUUCAUCCUUUUCUUCUCUGUGCUUGGACUGAAGGGAGCUCCCUUUAAUCGU
pyr-1043	CUUGGACUGAAGGGAGCUCC	ptc-MIR319d	-83.60	0.93	DangsuA,DangsuB	AAUGGUUUAACAGAGCUUCCUUCAGUCCACUCAUGGACGGGCGAAGGGUUUGGAUUAGCUGCCGACUCAUUCAUUCAAACACAGUAGACAAGGAGUGGCAGCGGCUGCUAUUGUGAAUGUGUGAAUGACGCGGGAGAUUAAUUUCAUCCUUUUCUUCUCUGUGCUUGGACUGAAGGGAGCUCCCUUUAAUUGU
pyr-1043	CUUGGACUGAAGGGAGCUCC	ptc-MIR319f	-90.70	1.01	DangsuA,DangsuB	UAAUGGUGGGAGAGAGCUUCCUUCAGCCCACUCAUGGAUAGGAGAAAGGGGUUGAAUUAGCUGCCGACUCAUUCAUUCAAGCACCAGUAGAAAAAGGGGAAUGGAUAUUCUUUUGCUACUGUGAUUGUGUGAAUGAUGCGGGAGAUAAUUUUACAUCCCCUCUUUUUCUGUGCUUGGACUGAAGGGAGCUCCUUCCUUCUAU
pyr-1043	CUUGGACUGAAGGGAGCUCC	ptc-MIR319g	-77.30	0.82	DangsuA,DangsuB	UAAUCGUGGGAGAGAGCUUCUUUCAGCCCACUCGUGGAUAGGACAAAGGGGUUGAACUAGCUGCCGACUCAUUCAUUCAAGCACUAGUAGAAAAAAAGGCGAACGGUGUUUCUUUUGCUACUGUGAUUGUGUGAAUGAUGCGGGAGAUAAUUUUCCAUCCUCUCCUUUUCUGUGCUUGGACUGAAGGGAGCUCCUUCCUUCUCU
pyr-1043	CUUGGACUGAAGGGAGCUCC	mes-MIR319b	-77.80	1.00	DangsuA,DangsuB	AGAGAGCUUUCUUCAGUCCACUCAUGGGUGGCAAUAAGAUUUAAUUAGCUGCCGACUCAUUCAUCCAAAUACUGAGUUAAAGGGCUAGCUGAGGAGGUUACCCAGUAAAUGAGUGAAUGAAGCGGGAGACAAAUUGAAUCUUAAGCUUCCUGUACUUGGACUGAAGGGAGCUCCCU
pyr-1043	CUUGGACUGAAGGGAGCUCC	mes-MIR319c	-94.80	1.02	DangsuA,DangsuB	GCAAUAUGUUAACGUUAAUCAGGACAUAGUAAUGAGAAAUGGUUUAAGAGAGCUUCCUUCAGUCCACUCAUGGACGGGUGAAGGGUUUGAAUUAUAUGCCGACUCAUUCAUUCAAACACAAUAGGAAAUGGUAACAGUGAUUGCUAUUGUGAAUGUGUGAAUGAUGCGGGAGAUAAAUUUCAUCCUUCUCUUCUCUGUGCUUGGACUGAAGGGAGCUCCCUUUAACUGUUUCUU
pyr-1043	CUUGGACUGAAGGGAGCUCC	vvi-MIR319f	-88.30	1.05	DangsuA,DangsuB	AGUGGUUUAAGAGAGCUUCCUUCAGUCCACUCAUGGAUGGGUUAGGGGUUUGGAUUAGCUGCCGACUCAUUCAUUCAAACACAGUAGAAUGGAAAUGGAGUUUACUACUGUGAAUGUGUGAAUGAUGCGGGAGGUAAAUUUCAUCCUUUUCUUGUCUGUGCUUGGACUGAAGGGAGCUCCCUUCUACUGUUUU
pyr-1043	CUUGGACUGAAGGGAGCUCC	mes-MIR319g	-93.90	0.93	DangsuA,DangsuB	GAAUGUGGAAAUGGUGUGAGAGAGCUUCCUUCAGCCCACUCAUGGAUGGGGUAAAAGGGGCGGAAAUAUCUGCCGACUCAUUCAUUCAAGCACUAGUAGACAGAGAUACUGGUAAUACUGUGUUUAGCUACUGUGAUUGCGUGAAUGAUGCGGGAGAUAAUUUUGCAUCCCUCUUUUCUGUGCUUGGACUGAAGGGAGCUCCUUCCUUCUCUAUUACCUACAUUU
pyr-1043	CUUGGACUGAAGGGAGCUCC	mes-MIR319d	-94.30	0.95	DangsuA,DangsuB	UUUUGCCUUGUGCAAGUUCCAUGUGAUGUAUUAUGAGAAACGGUUUAAGAGAGCUUCCUUCAGUCCACUCAUGGACGGGUGAAGGGUUUGAAUUAUAUGCCGACUCAUUCAUUCAAACGCAAUAGAAAAAGGGUAGAGGUUGCUAUUGUGAAUGUAUGAAUGAUGCGGGAGAUAAAAUUUCAUCCUUCUCUUCUCUGUGCUUGGACUGAAGGGAGCUCCCUUUAAUUGUUUCCUUCAUGAUG
pyr-1043	CUUGGACUGAAGGGAGCUCC	mes-MIR319e	-89.40	1.06	DangsuA,DangsuB	AAGGAGCUCUCUUCUGUCCAGUCCAAGGCAGUUGAAGCCUGAAACUUAGCUGCUGAGUCGUUGGUUCAAGAGCUCAUCAUAUGGUAAGCAGUGAAUGAGAUGUGUUUUUGAUCCAACGAAGCAGGAGCUAUGUUCUGUCAUGGCUGUCGUGUCUUGGACUGAAGGGAGCUCCCU
pyr-1043	CUUGGACUGAAGGGAGCUCC	ath-MIR319b	-79.30	1.18	DangsuA,DangsuB	AGAGAGCUUUCUUCGGUCCACUCAUGGAGUAAUAUGUGAGAUUUAAUUGACUCUCGACUCAUUCAUCCAAAUACCAAAUGAAAGAAUUUGUUCUCAUAUGGUAAAUGAAUGAAUGAUGCGAGAGACAAAUUGAGUCUUCACUUCUCUAUGCUUGGACUGAAGGGAGCUCCCU
pyr-1043	CUUGGACUGAAGGGAGCUCC	nta-MIR319b	-91.00	1.10	DangsuA,DangsuB	CGGUUUAAGAGAGCUUCCUUCAGUCCACUCAUAGGUGGAUGAAGGGGAUUUGGAUAGCUGCCGACUCAUUCAUUCAAACACAGUAGAAAAUCAUAUAUGUAUUUCUAUACGCUACUGUGAAUGUGUGAAUGAUGCGGGAGGUAAAUUCAUCCCUUUUUAUCUGUGCUUGGACUGAAGGGAGCUCCCUUUUGCCUUU
pyr-1043	CUUGGACUGAAGGGAGCUCC	amg-MIR319	-82.60	1.10	DangsuA,DangsuB	AAGGAGCUUCCUUCAGUCCACUCAUGGAUAGGGUAAAGGGUUUGAAUUAGCUGCUGACUCAUUCAUUCAAACACAAUAGAACACAGGUUUCUUCAAUACAGGCUAUUGUGAAUGUGUGAAUGAUGCAGGAGGUAAAUUUCAUCCUUUUCUUGUCUUUGCUUGGACUGAAGGGAGCUCCCUUU
pyr-1043	CUUGGACUGAAGGGAGCUCC	mtr-MIR319d	-88.00	1.14	DangsuA,DangsuB	AGAAAAAUAGUUCAAGAGAGCUCUCUUCAGUCCACUCAUGGAUAGGAAAAGGUUUUGAAUUAGCUGCUGACUCAUUCAUUCAAACACAAUAAGAAGAAGCAUGAUGAAUAUGCUAUAUUGUGAAUGUGUGAAUGAUGCGGGAGCUAAAUUUCAUCUUUCUCUUGUCUUUGCUUGGACUGAAGGGAGCUCCCUUUUGCUGUUUAUAUA
pyr-1043	CUUGGACUGAAGGGAGCUCC	rco-MIR319b	-84.90	0.96	DangsuA,DangsuB	AAGAAGGAGCUCUCUUCAGUCCAGUCCAAGGCGGUUGAGGGCUGGGACUUAGCUGCUGACUCGUUGGUUCAAGAGCUCAUCAUCAUCAAUGUGUAAGAGAUGUCUUUUUGAUCCAACGAAGCUGGAGCUGUGUUCAGUUAUGGCUGUCAUGUCUUGGACUGAAGGGAGCUCCCUCCAAU
pyr-1043	CUUGGACUGAAGGGAGCUCC	rco-MIR319a	-77.60	0.86	DangsuA,DangsuB	UUAAGAGAGCUUUCUUCAGUCCACUCAUGGGUGGCGGUAGGAUUUAAUUAGCUGCCGACUCAUUCAUCCAAAUACUGAGUUAAAAAGUUCAGAAAACAAAAGGGGCGGGUGCUGUAGAAAAGAAGGUUUACCCAGUAAAUGAGUGAAUGAUGCGGGAGACAAAUUGAAUCUUAAGCUUCCUGUACUUGGACUGAAGGGAGCUCCCUUUACU
pyr-1043	CUUGGACUGAAGGGAGCUCC	mtr-MIR319a	-86.90	1.13	DangsuA,DangsuB	AUUAUUAGAAAUAGAUGAAGAGAGCUUCCUUCAGUCCACUCAUGGAAGGGUAAGGGGUUUGAAUUACCUGCUGACUCAUUGAUUCAAACACAAUAGACAAUUAUGGGGUUAUGCUAUUGUGAAUGUGUGAAUGAUGCAGGAGGUGAAUUUCUUCCUUUUCUUCUUUGCUUGGACUGAAGGGAGCUCCCUUUUUCUAUUUAUAAAUUA
pyr-1043	CUUGGACUGAAGGGAGCUCC	mtr-MIR319b	-69.30	1.07	DangsuA,DangsuB	UAAGAGAGCUUUCUUUAGUCCACUCAUGGGUGACAAUAAGAUUUCAAUUAGCUGCUGACUCAUUCAUCCAAAUGUUGAGUAAAAUAUAUAGAAACAUAUACUCAUCAAAUGAGUGAAUGAUGCGGGAGACAAAUUGAAUCUUAAGUUUCCUAUACUUGGACUGAAGGGAGCUCCCUUUUC
pyr-1043	CUUGGACUGAAGGGAGCUCC	smo-MIR319	-98.60	0.86	DangsuA,DangsuB	UUGUUCGCGGGAGCUUCCUUUAGUUCAACUCAGGUGGAGCUGGAGAUGGUCCUGCUGCCGACUCAUGCAUCCGCGUACCUUGGAAAGUUACAAUGCCAGUUUCAGAAAGAGAGCUUCUUUUGUCCAGUGGUAGACGCUUGCAUGAUGCGGGAGCUGGUUCUCUCUCGAGCUUUGAUCGACCUGCCUUGGACUGAAGGGAGCUCCCUUGUUCCCAC
pyr-1043	CUUGGACUGAAGGGAGCUCC	stu-MIR319a	-85.20	0.99	DangsuA,DangsuB	AGAGCUUUCUUCGGUCCACACAUGGGGGGCGAUAGGGUUCAAUUUGCUGCCGACUCAUUCAUCCAAAUGUUGAGGUCUUGAUAGUCGAAUGCCACCUCAGCAACUGAGUGAAUGAAGCGGGAGUACAAGUUGAGUCUUGAGCUUCCUGUACUUGGACUGAAGGGAGCUCCCU
pyr-1043	CUUGGACUGAAGGGAGCUCC	sly-MIR319b	-117.80	1.09	DangsuA,DangsuB	GUCCCCUUUUUUAAGAUUCUAAUUUUGUGAUUUAGAUGUAAUGUGGAAGAUGGUAUAAGAGAGCUUCCUUUAGUCCACUCAUAGGUAGACGAAGGAUUUGAAUUAUCUCCCGACUCAUUCAUUCAAACGCAAUAGGAAGUAUGUAAUCUUAUACUAUUGUGAAUGUGUGAAUGAUGCGGGAGAUAAAUUCUCUCCUUUUUAUCUGUGCUUGGACUGAAGGGAGCUCCCUUUUACCUUCUUUCUUCGGUUUCUUUUAGUCGAAUUGGUUUCUUAUGAAUUAGUUGUUUGGGGC
pyr-1043	CUUGGACUGAAGGGAGCUCC	sly-MIR319c	-80.70	0.87	DangsuA,DangsuB	GGAAUGGUCCAAGAGAGCUUCCUUCAGCCCACUCACGGAGGAGAAAUGGGGUUGAAUUAGCUGCCGACUCAUUCAUCCAACCACUCAGUAGAAAGGAUAGGUUUUGUGCUACUGUGAUUGAGUGAAUGAUGCGGGAGAUAGUUUUCUAUCCCUCUCUUUCCUUGCUUGGACUGAAGGGAGCUCCUUUUCCCCAUU
pyr-1043	CUUGGACUGAAGGGAGCUCC	tae-MIR319	-101.50	0.95	DangsuA,DangsuB	AGUUUGAGGGAGCUCACUUCAGUCCACUCAUGGGAGGUAGCGGGGAUUGAACGAGCUGCCGACUCAUUCACUCGAGCACACAGUAGAUAUGAGACUAGUCCAGGGCAUACCAGUAUGUUACAAUAUGUACUGUGCGAAUGAGCGAAUGCAGCGGGAGAUUGUUCUCUCUUUCCUCCUCCAUGCUUGGACUGAAGGGAGCUCCCUCAUCUCU
pyr-1043	CUUGGACUGAAGGGAGCUCC	hbr-MIR319	-92.00	0.99	DangsuA,DangsuB	GUUGGAGUAAUGACUGAUGAGCAGUUAAGAGAGCUUUCUUCAGUCCAGUCACGGUGGGCAAUGGGAUUUAAUUAGCUGCCGACUCAUUCAUCCAAAUACUGAGUUAAAGGCUAGCUGAGAAAGUUACCCAGUAAAUGAGUGAAUGAUGCGGGAGACAAAUUGAAUCUUAUGCUUCCUGUACUUGGACUGAAGGGAGCUCCCUUUACUGUUAUUUAAUCCAA
pyr-1043	CUUGGACUGAAGGGAGCUCC	ctr-MIR319	-81.60	1.00	DangsuA,DangsuB	UUAAGCUGGGAGCUUUCUUCGGUCCACUUAUGGGUGGCAAUAGGAUUUAAUUAGCUGCUGACUCAUUCAUCCAAAUACUUAGUAAAGGGUCGAAAUGGAUACCCAGUAAAUGAGUGAAUGAUGCGGGAGACAAAUUGAAUCUUAAGCUUCCUGUGCUUGGACUGAAGGGAGCUCCCAUUGCUCGCU
pyr-1043	CUUGGACUGAAGGGAGCUCC	atr-MIR319a	-87.60	1.08	DangsuA,DangsuB	GAGGGAGCUCUCUUUAGUCCACCUAUGGUUGGUGUCUAGGGGUCGAAUUAUCUGCCGACUCAUUCAUUCAAAUAAUUGGUAGAAAGGCCGUGAUUUUUCUCUCUACUCUUUAAAUUUGUGAAUGAUGCGGGAGAUAAAUUUCACCCUUGCCUCACCAUUCUUGGACUGAAGGGAGCUCCCUC
pyr-1043	CUUGGACUGAAGGGAGCUCC	atr-MIR319c	-86.50	0.98	DangsuA,DangsuB	GAAGGAGCUCUCUUCAGUCCAGUCUAGGAUGGCAGUUCGAUCGAAUGCUGCUGCCGGGUCCUUCUCUUAUAAUGCCUUUGAUUUUUGUUUGAAAAGGAAACGAAGGCUUUGUGAUAGAAGUACGCGGGAGCUGAAUCUGGUUGACCCCUUCUUGCCUUGGACUGAAGGGAGCUCCCUC
pyr-1043	CUUGGACUGAAGGGAGCUCC	cme-MIR319b	-83.10	0.91	DangsuA,DangsuB	ACAAGGGAGCUCUCUUCAGUCCAGUCCAAGUCAGUUUUCUCGGUUGUUACUUAGCUGCUGACUCGUUGGCUCAAUAACUGAUCAACUGAUAUAUAAGCUUGAACAAUGAUGUGUUUUUGAACCAACGAUGCAGGAGCCAAGUUCAGCCAUGGCUGUCACGUCUUGGACUGAAGGGAGCUCCCUCACCUUCCAC
pyr-1043	CUUGGACUGAAGGGAGCUCC	cme-MIR319c	-85.60	0.92	DangsuA,DangsuB	GAGAGAGAGCUUCCUUCAGUCCACUCAUAGAGGGAUUCAAAGGGGUUGCUGAAGUAACUGCCGACUCAUUCACUCAAACACUCAGUAGAACUCAAAAAGAAAUUAUCCAAGAAAAAGAAAAGAAAAUUUGGUUCAAAGUAUAUUCUUUUCCUCUAUUGUGAUUGUGUGAAUGAAGCGGGAGAUAUUUUGCACUCUCUCUUAUUCUUUGCUUGGACUGAAGGGAGCUCCUCCUUUUUACUU
pyr-1043	CUUGGACUGAAGGGAGCUCC	cme-MIR319a	-77.80	1.02	DangsuA,DangsuB	UUAAGAGAGCUUUCUUCAGUCCACUCAUGGGUGGCGGUAGGGUUUAAUUAGCUGCCGACUCAUUCAUUCAAAUAUUGAGUCCAAAAAUUUCAAAUCUCAAAUGGAUUCACUAAACGAUUGAAUGAUGCGGGAGACAAAUUGAAUCUUAAGCUUCCUGUACUUGGACUGAAGGGAGCUCCCUUUUCUUUC
pyr-22	UUGACAGAAGAUAGAGAGCAC	aly-MIR157c	-78.20	0.68	DangsuA,DangsuB	CAUACUUUAUGAUGUUGCAUAUAUCACACAUACGUUUGAGAGUGAUGCUGGUUGUUGACAGAAGAUAGAGAGCACUAAGGAUGACAUGCAAGCACAUACAUAUAUCAUCACACCCCAUGUGGAUGAUAAAAUAUGUAUAACAAAUUCAAGAAAGAGAGAGAGAGAGAGAUCAGAUGUAGAGGGAGAGGGAGAGAAAGAGACUGCAUCUCUACUCUUUUGUGCUCUCUAUACUUCUGUCACCACCUUUAUUUCUUCUUCUCUCUCACCUACAUAUACGCACAGUCACAUCUAUG
pyr-22	UUGACAGAAGAUAGAGAGCAC	aly-MIR157b	-45.40	1.11	DangsuA,DangsuB	GUGUUGACAGAAGAUAGAGAGCACAGAUGAGAAGAUACAAUUCUUCGCAGCUUCUUUGCAUCUUACUCCUUUGUGCUCUCUAAGCUUCUGUCAUCAC
pyr-22	UUGACAGAAGAUAGAGAGCAC	aly-MIR157a	-54.10	1.08	DangsuA,DangsuB	GAGGCAUUGAGAGUGUUGACAGAAGAUAGAGAGCACAGAUGAUAAGAUACAAUUCGGAGCAGUUUCUUUGCAUCUUACUCCUUUGUGCUCUCUAGCCUUCUGUCAUCACCUUUUAUUUGCUUU
pyr-22	UUGACAGAAGAUAGAGAGCAC	vvi-MIR156i	-48.10	1.00	DangsuA,DangsuB	GGUGACGUUGUUGACAGAAGAUAGAGAGCACAGAUGAUGAAAUGCAAGGAGCCAGCAUCUCACUCCUUUGUGCUCUCUAUUCUUCUGUCAUCACCUUAAGGCC
pyr-22	UUGACAGAAGAUAGAGAGCAC	bna-MIR156c	-53.40	0.91	DangsuA,DangsuB	GGGAGUGAUGCAGGUUGUUGACAGAAGAUAGAGAGCACUAAGGAUGACAUGCAAGUACAAGGAUAUAAGGAAAUUCAAGAAAGAGAGGAAAAAAGAGCCUGCAUCUUUACUCUUUUGUGCUCUCUAUACUUCUGUCAAUACCAUUAUUUAUUCCU
pyr-22	UUGACAGAAGAUAGAGAGCAC	bna-MIR156b	-72.60	0.89	DangsuA,DangsuB	UAGGUUUGAGAGUGAUGCUGGUUGUUGACAGAAGAUAGAGAGCACUAAGGAUGACAUGCAAGUACAUAUGUAUGUAUCAUCACACCGCCUGUGGAUGAUUACAAAAAUAAAACCAAUUCAAAAGAGAGAGAGAGAGAGCCUGCAUGUCUACUCUUUCGUGCUCUCUAUACUUCUGUCACCACCAUUAUUUCUUCUUCUUUCUUACCUA
pyr-22	UUGACAGAAGAUAGAGAGCAC	mes-MIR156i	-46.80	1.34	DangsuA,DangsuB	UUGACAGAAGAUAGAGAGCACAGAUGAUGAUGUGCAAUUAAUGGAACUCAGCAUCUCACUCAUUUGUGCUCUCUAUGCUUCUGUCA
pyr-22	UUGACAGAAGAUAGAGAGCAC	mes-MIR156h	-43.80	1.25	DangsuA,DangsuB	UUGACAGAAGAUAGAGAGCACAGAUGAUGAUAUGCAAUAAUGGACUCUGCAUCUCACUCCUUUGUGCUCUCUAUGCUUCUGUCAU
pyr-22	UUGACAGAAGAUAGAGAGCAC	mes-MIR156j	-44.50	1.35	DangsuA,DangsuB	UUGACAGAAGAUAGAGAGCACAGAUGAUGAUGAAAUGCAUAAAGUUUGCAUCUCACUCCUUUGUGCUCUCUACUCUUCUGUCAU
pyr-22	UUGACAGAAGAUAGAGAGCAC	bna-MIR156g	-52.10	1.04	DangsuA,DangsuB	CGUUGAUAGUGUUGACAGAAGAUAGAGAGCACAGAUGAUGAGAUGCAAUUUGGAGCAGCUUGUAUGCAUCGUACUCCUUUGUGCUCUCUAGUCUUCUGUCAUCACUCGUUACUUG
pyr-22	UUGACAGAAGAUAGAGAGCAC	bra-MIR157a	-66.80	1.08	DangsuA,DangsuB	GUGAUGCUGGUUGUUGACAGAAGAUAGAGAGCACUAAGGAUGACAUGCAAGUACAUAUGUAUGUAUCAUCACACCGCCUGUGGAUGAUUACAAAAAUAGCCUGCAUGUCUACUCUUUCGUGCUCUCUAUACUUCUGUCACCACCAUUAU
pyr-22	UUGACAGAAGAUAGAGAGCAC	sly-MIR156c	-40.30	1.26	DangsuA,DangsuB	UUGACAGAAGAUAGAGAGCACGAAUAACGAGGUGCUAAUUGGAACAUGCACCUUAAUUCUUUGUGCUCUCAUUCUUUUGUCAU
pyr-22	UUGACAGAAGAUAGAGAGCAC	stu-MIR156b	-43.50	1.36	DangsuA,DangsuB	UUGACAGAAGAUAGAGAGCACAAAUGAUUAAGUGCAUGAAAAUUGUAUGCACCUUACUCCUUUGUGCUCUUUAUUCUUCUGUCACCA
pyr-22	UUGACAGAAGAUAGAGAGCAC	stu-MIR156c	-36.90	1.19	DangsuA,DangsuB	UUGACAGAAGAUAGAGAGCACGAAUAAUGGAAGCUGCAUGCACCUUAAUUCUUUGUGCUCUCUAUUCUUCUGUCAUCA
pyr-22	UUGACAGAAGAUAGAGAGCAC	stu-MIR156a	-41.50	1.22	DangsuA,DangsuB	UUGACAGAAGAUAGAGAGCACAGAUGAUAAAGUGCAUGGAAAUUGUCUGCACCUUACUCCUUUGUGCUCUUUAUUCUUCUGUCAUCA
pyr-22	UUGACAGAAGAUAGAGAGCAC	stu-MIR156d	-42.40	1.25	DangsuA,DangsuB	UUGACAGAAGAUAGAGAGCACUAAUGAUGAUAUGCUAAUUUCAUUCAGCAAAAGCAUCUCACUUCAUUUGUGCUCUCUAUGCUUCUGUCAUCA
pyr-22	UUGACAGAAGAUAGAGAGCAC	ahy-MIR156b	-57.30	1.15	DangsuA,DangsuB	GGAGGCACUAUUGGUAGAGUUGUUGACAGAAGAUAGAGAGCACAAAAGAUGAUAUGCAUAUAGAUAUAUAUAGUCUGCAUUUUAUUCCUUUGUGCUCUCUAAGCUUCUGUCAUCACUCUUCAGCCUCUAUUUCUA
pyr-22	UUGACAGAAGAUAGAGAGCAC	bgy-MIR156	-44.00	1.19	DangsuA,DangsuB	UGUUUGACAGAAGAUAGAGAGCACAGAUGAUGAUGUGCAAUUUUUGGAUUCUGCAUCUCACUCCUUUGUGCUCUCUAUGCUUCUGUCAUCA
pyr-22	UUGACAGAAGAUAGAGAGCAC	nta-MIR156j	-43.60	0.95	DangsuA,DangsuB	UGACAAUUGUUGACAGAAGAUAGAGAGCACUAAUGAUGAUAUGCUAAGUAAAUGUAGGGGCAAAAGCAUCUCAAUUCAUUUGUGCUCUCUAUGCUUCUGUCAUCACCUUCGGCCA
pyr-22	UUGACAGAAGAUAGAGAGCAC	vvi-MIR156f	-44.40	0.94	DangsuA,DangsuB	UUAUGUUCUGUUGACAGAAGAUAGAGAGCACAACUGAACAUACCCAAGAGGGCUUGUGUUUGAGCAGUCUUGUCCUCUCUCUUCUCCUGUCAACAGAACUUGCUG
pyr-22	UUGACAGAAGAUAGAGAGCAC	mtr-MIR156f	-48.70	1.28	DangsuA,DangsuB	GUUUGUUGACAGAAGAUAGAGAGCACAUCUGAACAAACACAAAAGACAUUGUGUUUGAACAGUUGUGUGCUCUCUGCUCUUCUGCCAACAUACU
pyr-22	UUGACAGAAGAUAGAGAGCAC	gma-MIR156e	-52.30	0.89	DangsuA,DangsuB	AGGAGGUGUUGGUGAUGCUGUUGACAGAAGAUAGAGAGCACUGAUGAUGAAAUGCAUGAAAGGGAAUGGCAUCUCACUCCUUUGUGCUCUCUAGUCUUCUGUCAUCAUCCUUCUCCCUCCCCUC
pyr-22	UUGACAGAAGAUAGAGAGCAC	gma-MIR156d	-51.57	0.92	DangsuA,DangsuB	CUACUUGGUAAUUAAGGUUGUUGACAGAAGAUAGAGAGCACAGAUGAUGAUAUGCAUAUUAUAUAAUAUAUAGCAGGGAACUCAUGAUGAAUUGUGCAUCUUACUCCUUUGUGCUCUCUAUACUUCUGUCAUCACCUUCAGCCUCCAUUUC
pyr-22	UUGACAGAAGAUAGAGAGCAC	gma-MIR156g	-54.70	1.22	DangsuA,DangsuB	UGAACAAUAUCUUGAACAGUUUGUUGACAGAAGAUAGAGAGCACAGGUGAUCAUACCCAAAAAAGCUUUUGUGUGUGAGCAGUUUUGUGCUCUCUAUCUUCUGUCAAUGUACUUCUCA
pyr-22	UUGACAGAAGAUAGAGAGCAC	atr-MIR156c	-63.50	0.79	DangsuA,DangsuB	GAUGAGCAGGGGAGAUGAGCUUGAAAGUAGAGUUGGUUGUUGACAGAAGAUAGAGAGCACAAAACCAACACAAGCAAUAGGCUUUCAUGCUUCUGGAGGAUAUGUGCUCUCUAUACUUCUGCCACCAUGCCCUUAGAAGCACUCUAUUUCUAUUCCCUCUCUUCCCUUCCCUCUC
pyr-22	UUGACAGAAGAUAGAGAGCAC	gma-MIR156c	-45.20	0.54	DangsuA,DangsuB	ACUUGACCACUAGGCUUAUCUCUUUCCGUUUCUGAGCAUGCAUACUCAUUCACAGCAUCAAAAUGCACAGAUCCUGAUGGAGAUUGCACAGGGCAGGUGAUGCUAGAUUGCACCAUACUCAACUCUGGACUUUGUGAUUGAAGUGUUGACAGAAGAUAGAGAGCACAACCUGAGUCAAAGGAUCC
pyr-22	UUGACAGAAGAUAGAGAGCAC	cpa-MIR156e	-43.00	1.13	DangsuA,DangsuB	UUGACAGAAGAUAGAGAGCACAGAUGAUGAAAUGCAAAUUAGAAGGACCAAACAGUGCAUCUCACUCCUUUGUGCUCUCUAUUCUUCUGUCAUCA
pyr-22	UUGACAGAAGAUAGAGAGCAC	gma-MIR156m	-49.30	1.01	DangsuA,DangsuB	AGGGUUGUUGACAGAAGAUAGAGAGCACAGAUAGUGAUAUGCAUAAAAAUAUGGAACGGGAAAGCAAUUGCAUCUCACUCCUUUGUGCUCUCUAGGCUUCUGUCAUCCACACCUU
pyr-22	UUGACAGAAGAUAGAGAGCAC	cpa-MIR156f	-44.20	1.08	DangsuA,DangsuB	UUGACAGAAGAUAGAGAGCACAGAUGAUGAUAUGCAAUUCAUUAAUGGAUCAGAUCAACUCUCUGCAUCUCACUCCUUUGUGCUCUCUAUGCUUCUGUCAUCA
pyr-22	UUGACAGAAGAUAGAGAGCAC	rco-MIR156f	-43.30	1.31	DangsuA,DangsuB	UUUUGUUGACAGAAGAUAGAGAGCACAACUUAACAUACCCAACGACAGAUUUGUGUAUGUGAAGUUUUGUGCUCUUUUUUCUUCUGUCAACUUAUAU
pyr-22	UUGACAGAAGAUAGAGAGCAC	ptc-MIR156j	-46.40	1.05	DangsuA,DangsuB	GGUGAUGUUGUUGACAGAAGAUAGAGAGCACAGAUGAUGAUAUGCAAUGGACUCUGCAUCCCACUCCUUUGUGCUCUCUAUGCUUCUGUCAUCACUUUCA
pyr-22	UUGACAGAAGAUAGAGAGCAC	gma-MIR156i	-52.44	1.03	DangsuA,DangsuB	UUAAGGUUGUUGACAGAAGAUAGAGAGCACAGAUGAUGAUAUGCAUAUUAUAUAAAAAGCAGCUAGGGAACUCAUGAAUUGUGCAUCUCACUCCUUUGUGCUCUCUAUACUUCUGUCAUCACCCUUCAGC
pyr-22	UUGACAGAAGAUAGAGAGCAC	gma-MIR156j	-41.90	1.02	DangsuA,DangsuB	GGUGAUGCUGUUGACAGAAGAUAGAGAGCACAGAUGAUGAAAUGCAAGAAAGGAAAUGGCAUCUUACUCUUUUGUGCUCUCUAGUCUUCUUGUCAUCAUCAUU
pyr-22	UUGACAGAAGAUAGAGAGCAC	mdm-MIR156ab	-82.20	0.96	DangsuA,DangsuB	AGGAGUGGGGAACUGGGAGAGAGAAAGAGCAGGGAGUGAUGAUACAUUGUUGACAGAAGAUAGAGAGCACAGAUGGAUGACUUGCAAUUGACUAUGCAUCUCACUCCUUUGUGCUCUCUAUGCUUCUGUCAUCACCUCGUUAUAUCUAGCUUCCUUGCCUCUCUCCACACCCGUGCACCU
pyr-22	UUGACAGAAGAUAGAGAGCAC	mdm-MIR156ac	-98.30	0.90	DangsuA,DangsuB	CAAUCUCUAAUCAUAUUAUAGUAUUAAAUUUAGGGUAAGGACUAGGGAACUGGGAGAGAGAAAGAGCAGGGAGUGGUGAUACGUUGUUGACAGAAGAUAGAGAGCACAGAUGGAUGACUUGCAAUGGACUAUGCAUCUCACUCCUUUGUGCUCUCUAUGCUUCUGUCAUCACCUAGCUAUAUCCAGCUUCCCUGCCCCUCCCCCACACCCCUGCACCUCCCAUAUUAAUCUAAUUCAUAAAAUGAUUAUUUGAUUG
pyr-22	UUGACAGAAGAUAGAGAGCAC	nta-MIR156i	-46.80	1.09	DangsuA,DangsuB	UGAUAAUUGUUGACAGAAGAUAGAGAGCACUGAUGAUGAUAUGCUAAUUAAAUUUGUGCAGCAAAAGCAUCUCAAUUCAUUUGUGCUCUCUAUGCUUCUGUCAUCACCUUCAGCCA
pyr-22	UUGACAGAAGAUAGAGAGCAC	nta-MIR156h	-46.50	0.95	DangsuA,DangsuB	GGAGAUGCUGUUGACAGAAGAUAGAGAGCACAGAUGAUGAUAAGAUGCUAAUUGGAAGCUUUCUGCACCUUAAUCCUUUGUGCUCUCUAGUCUUCUGUCAUCAUCCUCAGCC
pyr-22	UUGACAGAAGAUAGAGAGCAC	atr-MIR156a	-80.40	1.01	DangsuA,DangsuB	AGGGUUUAUAUGUGAGGGAGUAAGUAAUAGAGAGAGGGGGUCUGGUGUUGUUGACAGAAGAUAGAGAGCACAUAAAGUAACGUGCAGUGGGCGUUUGCAUUUUAUUUUGUAUGUGCUCUCUAGCCUUCUGUCAUCACCUGCUCACCAUUCCCACCCAUCUUACUUCUCCAACAUAUUUCUAAUCCU
pyr-22	UUGACAGAAGAUAGAGAGCAC	nta-MIR156g	-49.80	0.82	DangsuA,DangsuB	GUGAGAUUGUUGACAGAAGAUAGAGAGCACAGAUGAUGAUCAUGCUGCUAAAUCUGGGAUUGGAGAGGGCACUGAAUCAAUUAAACUGCAAAAAAAAAAAGCAUCUCAAUUCAUUUGUGCUCUCUAUGCUUCCGUCAUCACCUUCACCG
pyr-22	UUGACAGAAGAUAGAGAGCAC	vvi-MIR156g	-49.00	1.00	DangsuA,DangsuB	GGUGAUGUUGUUGACAGAAGAUAGAGAGCACAGAUGAUGAUGUGCAUGGAGUUUGCAUCUCACUCCUUUGUGCUCUCUAGACUUCUGUCAUCACCUCAGCCCC
pyr-22	UUGACAGAAGAUAGAGAGCAC	ath-MIR157b	-55.40	0.94	DangsuA,DangsuB	UGGGAGGCAUUGAUAGUGUUGACAGAAGAUAGAGAGCACAGAUGAUAAGAUACAAUUCCUCGCAGCUUCUUUGCAUCUUACUCCUUUGUGCUCUCUAGCCUUCUGUCAUCACCCGUUAUUUGCCAUCACCCA
pyr-22	UUGACAGAAGAUAGAGAGCAC	han-MIR156c	-44.70	1.18	DangsuA,DangsuB	AUGUUGACAGAAGAUAGAGAGCACAGAGAAGCAUGAAUUGCACAUAGAUAUUGCAAUUCACUCCUUCGUGCUCUCUAUGCUUCUGUCAUUACC
pyr-22	UUGACAGAAGAUAGAGAGCAC	mtr-MIR156h	-42.40	1.06	DangsuA,DangsuB	UGCUGUUGACAGAAGAUAGAGAGCACAGAUGAUGAAAUGCAUGGAAGGCAAUGGCAUCUCAUUCCUUUGUGCUCUUUAUUCUUCUGUCAUCACC
pyr-22	UUGACAGAAGAUAGAGAGCAC	gma-MIR156l	-45.90	0.90	DangsuA,DangsuB	GGUAAGGUUGUUGACAGAAGAUAGAGAGCACAGAUGAUGAUAUGCACAUAUACAUGGAACAGGAAUUUAAGCAAUUGCAUCUCACUCCUUUGUGCUCUCUAAGCUUCUGUCAUCCACCUCC
pyr-22	UUGACAGAAGAUAGAGAGCAC	vun-MIR156b	-56.20	1.00	DangsuA,DangsuB	AGGAGGUGUUGGUGAUGCUGUUGACAGAAGAUAGAGAGCACAGAUGAUGAAAUGCAUGAAAGGAAAUUGCAUCUCGCUCCUUUGUGCUCUCUAUUCUUCUGUCAUCACCCUUUUGUACCUUCCCUC
pyr-22	UUGACAGAAGAUAGAGAGCAC	cca-MIR156c	-47.70	1.19	DangsuA,DangsuB	GGAUGUUGACAGAAGAUAGAGAGCACUGAGAGGACAUGAAGUGCAUAUAUAUAAUGCACCUCGCUUCUUUGUGCUCUUUAUACUUCUGUCAUUACCCU
pyr-22	UUGACAGAAGAUAGAGAGCAC	ath-MIR157c	-75.30	0.91	DangsuA,DangsuB	AGGUUUGAGAGUGAUGUUGGUUGUUGACAGAAGAUAGAGAGCACUAAGGAUGACAUGCAAGUACAUACAUAUAUAUCAUCACACCGCAUGUGGAUGAUAAAAUAUGUAUAACAAAUUCAAAGAAAGAGAGGGAGAGAAAGAGAGAGAACCUGCAUCUCUACUCUUUUGUGCUCUCUAUACUUCUGUCACCACCUUUAUCUCUUCUUCUCUCUAACCU
pyr-22	UUGACAGAAGAUAGAGAGCAC	mtr-MIR156e	-81.30	1.56	DangsuA,DangsuB	GGUUGUUGACAGAAGAUAGAGAGCACAGAUGAUGAUAUGCAUUUAUAUAUAUAUAUAUAUAUAUAUAUAUAUAUAUAUAUAUAUAUAUAUAUAUAUAUGAGGAGCUGGAGCUGCAUGGAGAUGAAUUUUGUGCAUAUCACUCCUUUGUGCUCUCUAUGCUUCUGUCAUCACC
pyr-22	UUGACAGAAGAUAGAGAGCAC	ath-MIR157a	-46.00	1.07	DangsuA,DangsuB	GUGUUGACAGAAGAUAGAGAGCACAGAUGAUGAGAUACAAUUCGGAGCAUGUUCUUUGCAUCUUACUCCUUUGUGCUCUCUAGCCUUCUGUCAUCACC
pyr-22	UUGACAGAAGAUAGAGAGCAC	gra-MIR157b	-44.30	1.05	DangsuA,DangsuB	GUUGUUGACAGAAGAUAGAGAGCACAGAUGAUGGUGUUGCCUAUGUGCAUGCAUCCCACUCCUUUGUGCUCUCUAUGCUUCUGUCAUCAUC
pyr-22	UUGACAGAAGAUAGAGAGCAC	gra-MIR157a	-44.40	0.99	DangsuA,DangsuB	GUUGUUGACAGAAGAUAGAGAGCACAGAUGAUGGUGUGCAAUUAGGAGUCUUGAAGCAAUGCAUCCCACUCCUUUGUGCUCUUUAUGCUUCUGUCAUCACC
pyr-22	UUGACAGAAGAUAGAGAGCAC	rco-MIR156g	-43.90	1.00	DangsuA,DangsuB	UGUUGUUGACAGAAGAUAGAGAGCACUGACGAUGAAAUGCAUGAUGGGACUCUGCAUCUCACUCCUUUGUGCUCUCUAGUCUUCUGUCAUCAUCACC
pyr-22	UUGACAGAAGAUAGAGAGCAC	lus-MIR156h	-38.40	1.20	DangsuA,DangsuB	UUGACAGAAGAUAGAGAGCACAGAUGAUGAGAUACUAAUGAAAGAAUCUCACUUUCCUUUGUGCUCCCUAUGCUUCUGUCAU
pyr-22	UUGACAGAAGAUAGAGAGCAC	lus-MIR156i	-68.10	1.05	DangsuA,DangsuB	AUAUGAAGGAAAGAGGUGGAUUUGGAUAUAUUGGUUGUUGACAGAAGAUAGAGAGCACAGAUGAUCUGGGAUGUCUCGAACCAUAUAUAUAUAUAUCUGCAUCUCCAUCCUUUGUGCUCUCUAGUCUUCUGUCAUCACCUUCAUCCAUCCUAGCUUUCUUUUGUGU
pyr-22	UUGACAGAAGAUAGAGAGCAC	ptc-MIR156i	-40.80	0.93	DangsuA,DangsuB	UGUGAUGUUGUUGACAGAAGAUAGAGAGCACAGAUGAUGUUUUGCAGUAGACUCUGGAUCUCACUCCUUUGUGCUCUCUAUGCUUCUGCCAUCACCUUC
pyr-22	UUGACAGAAGAUAGAGAGCAC	ptc-MIR156h	-45.90	1.00	DangsuA,DangsuB	GGUGAUGCUGUUGACAGAAGAUAGAGAGCACUGACGAUGAAAUGCAUGGAGCUUAAUUGCAUCUCACUCCUUUGUGCUCUCUAGUCUUCUGUCAUCACCUUCA
pyr-22	UUGACAGAAGAUAGAGAGCAC	ptc-MIR156g	-49.70	1.13	DangsuA,DangsuB	GGUGAUGUUGUUGACAGAAGAUAGAGAGCACAGAUGAUGAAAUGCAUGGAGCUUAAUUGCAUCUCACUCCUUUGUGCUCUCUAGUCUUCUGUCAUCACCUUCA
pyr-22	UUGACAGAAGAUAGAGAGCAC	lus-MIR156e	-50.60	0.99	DangsuA,DangsuB	GGAAGGAUAAGGAUUGUUGUUGUUGACAGAAGAUAGAGAGCACAGAUGAUGAAAUACUGUAGUGAAAGUAUCUCACUUUCCUUUGUGCUCCCUAUGCUUCUGUCAUCACAUGCACCUUCCUUUC
pyr-22	UUGACAGAAGAUAGAGAGCAC	lus-MIR156f	-60.50	0.95	DangsuA,DangsuB	GGGUUGAGAGCUCUUUUGGGGGAUGUUGUUGACAGAAGAUAGAGAGCACAGAUGAUGGGAUACAAUUGAUAGUAUACAUAUCUCACUUCCUUUGUGCUCUCUAUGCUUCUGUCAUCAUCUUUUCGAGCGGCCUCCUCGAUCC
pyr-22	UUGACAGAAGAUAGAGAGCAC	hbr-MIR156	-58.10	1.06	DangsuA,DangsuB	GGGCACUGGUGGUGAUGUUGUUGACAGAAGAUAGAGAGCACAGAUGAUGAUAUGCAAUUAAUGGACUCUGCAUCUCACUCCUUUGUGCUCUCUAUGCUUCUGUCAUCACCUUCAGCCCU
pyr-22	UUGACAGAAGAUAGAGAGCAC	lus-MIR156b	-76.60	1.05	DangsuA,DangsuB	UUAGAGGAGAUGAAGGUUUUGGGUUGAGAGCCCUUUUGGGAUAUGUUGUUGACAGAAGAUAGAGAGCACAGAAGAUGAUGGGAUACAAUUGAUAGUAUCUCACUUCCUUUGUGCUCUCUAUGUUUCUGUCAUCACCUGUUCGGGCCUCUUCCAUCCUUCCUCUUUUUCGA
pyr-22	UUGACAGAAGAUAGAGAGCAC	lus-MIR156c	-46.80	1.09	DangsuA,DangsuB	GGUUUGUUGACAGAAGAUAGAGAGCACAGAUGAUUUUGGGAUGUCGUCAAACCCCACAUCGCCAUCAUUUGUGCUCUCUAUGUUUCUGUCAUCACUUUC
pyr-22	UUGACAGAAGAUAGAGAGCAC	tcc-MIR156f	-52.60	0.97	DangsuA,DangsuB	UACGGAUGAGGACGCUUUUGUUGACAGAAGAUAGAGAGCACAACUGAACAUACCCAGAAAAGGCCUGUGUAUGAGCAGCCUUGUGCUCUCUUUUCUUCUGUCAAUGGAAUUUUCUGUCAGAGUU
pyr-22	UUGACAGAAGAUAGAGAGCAC	tcc-MIR156e	-59.70	1.09	DangsuA,DangsuB	AGGAGGAACUGGUGAUGUUGUUGACAGAAGAUAGAGAGCACAGAUGAUGAGAUGCAUGGAGCCUGCAUUUCACUCCUUUGUGCUCUCUAUUCUUCUGUCAUCACCUUUCAUCCCCUCACUUAA
pyr-22	UUGACAGAAGAUAGAGAGCAC	bol-MIR157a	-42.70	1.04	DangsuA,DangsuB	GGUUGUUGACAGAAGAUAGAGAGCACUAAGGAUGACAUGCAAGUACAAGGAUAUAAGGAAAUUCGCAUCUUUACUCUUUUGUGCUCUCUAUACUUCUGUCAAUACC
pyr-22	UUGACAGAAGAUAGAGAGCAC	ppe-MIR156g	-46.30	1.40	DangsuA,DangsuB	UUGACAGAAGAUAGAGAGCACAGAUGGAUGAUUUGCAAUCAAUAUGCAUCUCACUCCUUUGUGCUCUCUAUGCUUCUGUCAU
pyr-22	UUGACAGAAGAUAGAGAGCAC	cme-MIR156b	-53.50	0.94	DangsuA,DangsuB	UAUAUGUUGUUGACAGAAGAUAGAGAGCACAGAUGAUGAUAUGCAAAAAUUUCAUCAAUCAUUAUUAUUAAUAUCAUUCUUUGUUUUUUAGGGUUUAGAACUUUAGAGAGAGACAUUAUUAUCCUUAUCACUAUGCAUUUCACUCCAUUUGUGCUCUCUAUGCUUCUGUCAUCACUCUCUUC
pyr-22	UUGACAGAAGAUAGAGAGCAC	ppe-MIR156i	-46.30	0.99	DangsuA,DangsuB	AUGUUGUGGUUGACAGAAGAUAGAGAGCACAAAUGAACAUAUACACCCAGUCACCCAGACCCAGGAAAAUGAUUGUGUAUGAUCAGUUUUGUGCUCUCUUUUCUUCUGCCAACAUAUUAUAU
pyr-22	UUGACAGAAGAUAGAGAGCAC	ppe-MIR156h	-48.50	0.97	DangsuA,DangsuB	AGGUUUUGUUGACAGAAGAUAGAGAGCACAGAUGAAGAAAUGCAUGGACAUCGACAUGGCAGGCAGCAUCUCUCUCCUUUGUGCUCUCUAUGCUUCUGUCAUCACACCU
pyr-22	UUGACAGAAGAUAGAGAGCAC	sly-MIR156a	-43.20	1.20	DangsuA,DangsuB	UUGACAGAAGAUAGAGAGCACUAAUGAUGAUAUGCUAAUUUCAUUCAAUUUGGGCAGCAAAAGCAUCUCAAUUCAUUUGUGCUCUCUAUGCUUCUGUCAU
pyr-22	UUGACAGAAGAUAGAGAGCAC	sly-MIR156b	-38.80	1.18	DangsuA,DangsuB	UUGACAGAAGAUAGAGAGCACGAAUAAUGAGGUGCUAAUUGGAAGCUGCACCUUAAUUCCUUGUGAUCUCUAUACUUCUGUCAU
pyr-22	UUGACAGAAGAUAGAGAGCAC	bcy-MIR156	-44.00	1.19	DangsuA,DangsuB	UGUUUGACAGAAGAUAGAGAGCACAGAUGAUGAUGUGCAAUUUUUGGAUUCUGCAUCUCACUCCUUUGUGCUCUCUAUGCUUCUGUCAUCA
pyr-22	UUGACAGAAGAUAGAGAGCAC	rco-MIR156h	-45.50	1.11	DangsuA,DangsuB	UGUUGUUGACAGAAGAUAGAGAGCACAGAUGAUGAUGUGCAAUGACUUUUUCUGCAUCUCACUCCUUUGUGCUCUCUAUGCUUCUGUCAUCACCUUC
pyr-23	GGACAGUCUCAGGUAGACA	gma-MIR5368	-68.90	0.76	DangsuA,DangsuB	ACUGUUUCCUGGGAUUGGCUUUGGGCUUUCCUGCACAGCUUAGGUGGAGGGCAAAGAAGACUUCCUUCUGAGGGGGCCAGAGCCAUCAGAGAGAUACCACUCUGGACGAGCUAGAAUUCUAACCUUGUGCCAGGACCUAUGGGCCGAGGGACAGUCUCAGGUAGACAGU
pyr-878	UGUGUUCCCAGGUCGCCCCUG	atr-MIR398	-69.50	0.81	DangsuA,DangsuB	AGCCCAAAUUCGAAGAAGCAUCAGAAUGGGGAAGUCUCAACAGGAGCGAUAUGAGAACACACAAUCAUAUGCAUAAAUAUUGUGUAUGUGUGUGUGCACGUGUGCAUGUGCAUGUGCGUGCUUGUGUGUUCCCAGGUCGCCCCUGCCGAGCCUGCCCAUAUCUAUAAAUAAUUCUUCUUGCUGCU
pyr-875	UAGCCAAGGACGACUUGCCUG	ptc-MIR169q	-53.30	0.90	DangsuA,DangsuB	UCUUGUUAGUUAGCCAAGGACGACUUGCCUGUUCCUAGCAAUUUGGGAUUUGCCCUGGACUAAGAGGCAGGACCCUCAUUCCGGGUUUCAGGCAGUCUCCUUGGCUAGGUUGACA
pyr-871	CAGCCAAGGAUGACUUGCCGG	aqc-MIR169c	-47.90	1.14	DangsuA,DangsuB	AAUGCAGCCAAGGAUGACUUGCCGGAACGUUGUUAACCAUGCAUAUGAAUAAUGUGAUGAUUAAUUAUGUGAUGAACAUAUUUCUGGCAAGUUGUCCUUCGGCUACAUUUU
pyr-871	CAGCCAAGGAUGACUUGCCGG	mes-MIR169b	-41.10	0.81	DangsuA,DangsuB	CAGCCAAGGAUGACUUGCCGGCUAGCUCUUGUAGCAUGCUUAUACUUUGCCAUUAACUAAGGAUGAUGUGUCUGGCCAGUAGAUGAUCGGCAAGUCAUCUCUGGCUA
pyr-871	CAGCCAAGGAUGACUUGCCGG	bdi-MIR169c	-78.60	0.96	DangsuA,DangsuB	UUGCCAUACGCUAAGAGGCAGAGAAGGGGAUGCAGCCAAGGAUGACUUGCCGGCUCCUGGUGUUGGGGGAAUUGCAGCUUUGUUGAGCCUUGAGUUAGCCGGCAGGUUGUCCUUGGCUACACCUAGUUCUCUUCUUCUGGUGUUUGGCCCU
pyr-871	CAGCCAAGGAUGACUUGCCGG	tcc-MIR169k	-67.80	1.01	DangsuA,DangsuB	AAGAGGUAGACAGUGUGGUGCAGCCAAGGAUGACUUGCCGGCUAAUCCCUAGGAGGCAUGCAUUUGCCUUGUUUCUCUGCUUUAGAUUAUUCCGGCUAGUUGUCCUUGGCUACGGUGCGCUGUCUUCUUCUC
pyr-871	CAGCCAAGGAUGACUUGCCGG	nta-MIR169q	-128.10	1.01	DangsuA,DangsuB	GAGUGGAUUGCAGCCAAGGAUGACUUGCCGGGAUGUUGUAGUCAAUGCAACGACUUAUCGGUAGGUCGUCCUUGGCUACAUUUUACUCUCUUCUGCUCAUGUAAGGCUCUAUAAGAUAUAUAUAUAAUUCGAGGUGAAGUCAGUAAUUGUUUCACAAAUUACAUCCUUUUUUAAUUGCUCAUAAUUUGUCUAGAGAGUCAUUGCAUGAAAAAGUAGCGAGUGAAUUGCAGCCAAGGAGACUUGUCAAGAUGUUGCAGCCAAUGCAACGACUUAUCGGCAGGUCGUCCUUGGCUACAUUUCACUCUCU
pyr-871	CAGCCAAGGAUGACUUGCCGG	osa-MIR169c	-56.00	0.88	DangsuA,DangsuB	GAACGGGAUGCAGCCAAGGAUGACUUGCCGGCUCCUGGUAUUGGGGGAAUCUCAGCUUUGCUGAAGCGCCUUGGAGUUAGCCGGCAAGUCUGUCCUUGGCUACACCUAGCUC
pyr-871	CAGCCAAGGAUGACUUGCCGG	mes-MIR169e	-43.10	0.94	DangsuA,DangsuB	GAGGUAGAGAGUGUAAUUCAGCCAAGGAUGACUUGCCGGAAACACUGCGCAUCUUUGCCGGCAAGUUGUAGCUUGGCUAUGUUGUACUCUUUUCUUC
pyr-871	CAGCCAAGGAUGACUUGCCGG	bdi-MIR169f	-85.20	0.90	DangsuA,DangsuB	GGGCCAUGCAGGACGAGGCACAGAGCAGGAUGCAGCCAAGGAUGACUUGCCGGCCGGCUGGCCGGCAAUGUCGCCGCCGGCGUGACAUGAUGCUUGCCCGGCAAGUUUGUCCUUGGCUACACCUUGCUCUCUGCCCAUCAUGUGUUGCCCU
pyr-871	CAGCCAAGGAUGACUUGCCGG	vvi-MIR169k	-57.90	0.88	DangsuA,DangsuB	GAGAGUGGAGUGCAGCCAAGGAUGACUUGCCGGAAUUCACAUAUAGAGUGGAAUGAGGCAAGAGGCCGGCCUCUUCCCAUGGUGUCCCUGGCAGGUUGUCCUUGGCUACCUUUCGUUCUCUU
pyr-871	CAGCCAAGGAUGACUUGCCGG	gma-MIR169v	-95.80	0.75	DangsuA,DangsuB	CAUGUAAUGCAGCCAAGGAUGACUUGCCGGCAAGCUUCUUUUGGCAUUGUGAAUCAAGUUUUAAACCGUGGUUGCAGUUUCAUUGUGAUAAAUUGCGGAUAAAUGCGGCCAAUGUGCAGCAUUUUGGUCACAGUAACACCAAAAAUCUUGAUGCUGUGGUUGAAAUCAGGACAUGUGGACCGGUUUUUAAAACCUUGAUUGUGAAGACCUAAUCACAUUAGUUAUGCUCAAAUGCACAUUAUGCUGCCUUAGAAGUCAAGUGUAACUAGUUGCCCGGCAAGUCGUCUCUGGCUACAUAAAGG
pyr-871	CAGCCAAGGAUGACUUGCCGG	osa-MIR169b	-62.00	1.02	DangsuA,DangsuB	GAACGGAAUGCAGCCAAGGAUGACUUGCCGGUACGUGUAUGCAUGUUUCAAGGUACUAUAUGUGCCCCCAACUGUUUUAGAUCCAUGCUGACAUUUUCCGGCAAGUUGUCCUUGGCUACGUCUUGUUC
pyr-871	CAGCCAAGGAUGACUUGCCGG	mes-MIR169a	-38.10	0.87	DangsuA,DangsuB	AUGCAGCCAAGGAUGACUUGCCGGCGUUUGCUUAGUGACCUAUCUAGAUUUGGCAUAUACCUCAAGCCGGCAAGCUGUUCUUGGCUACAU
pyr-871	CAGCCAAGGAUGACUUGCCGG	vvi-MIR169s	-38.30	0.75	DangsuA,DangsuB	GAAAGUGGAUUGCAGCCAAGGAUGACUUGCCGGCACUUGGCAUUAGGCACCAUCGAUCAUCUUCCCGGCAAGUUGUUCCUGGCUACAUUCUGCUCUCUU
pyr-871	CAGCCAAGGAUGACUUGCCGG	gma-MIR169m	-44.10	0.96	DangsuA,DangsuB	GAAAGUAGAGUGCAGCCAAGGAUGACUUGCCGGAGCAAUAAGCAAUAAUAUCUAUCUAUUUUAUCUUUCUUUUCUUCUUAUUCUUUCACGCCGGCAAGUUGUUCUUGGCUACAUUUUGUUUUC
pyr-871	CAGCCAAGGAUGACUUGCCGG	vvi-MIR169w	-54.80	0.84	DangsuA,DangsuB	GGUUAUGUGGUGCAGCCAAGGAUGACUUGCCGGCAACUCCCUUUAUUGUACUCAUGCAUGCUCAUACUUAUACUGUUGUGGGCAUCAUUUAAGUGGCAAAAAUGGUGGUCGGCGAGUCAUUCUUAGCUACAUUUCUGCCUCAU
pyr-871	CAGCCAAGGAUGACUUGCCGG	sly-MIR169a	-69.60	1.09	DangsuA,DangsuB	GGUCUAUAAGGUUUGCAUGAAGUUGAAGAGAGUCAAGUUGCAGCCAAGGAUGACUUGCCGGACCAAAAGUUGUGACCAUUUUCUAGUUCCGGCAAGUUGUUUUUGGCUAUAAGUUUGCUCUCUUCUUCUCAUGUUAUCCUCGUUAGACC
pyr-871	CAGCCAAGGAUGACUUGCCGG	gma-MIR169g	-41.50	0.88	DangsuA,DangsuB	AAGUAGAGUGCAGCCAAGGAUGACUUGCCGGAGCAAUAAGAAUAAACAAUAAAAUGUAUCUAUUUAUAACAUUCUUCUUCUUCUUCUUCUUCUUUCACGCCGGCAAGUUGUUCUUGGCUACAUUUUGUUU
pyr-871	CAGCCAAGGAUGACUUGCCGG	gma-MIR169f	-87.80	1.33	DangsuA,DangsuB	GAACUUGCACGAAGAGGCAGAGAGUGUAGUGCAGCCAAGGAUGACUUGCCGGCAUUAGCCAAGUGAAUGAGCAUCAUAUAUAUAUAUAUAUAUAUAUAUAUAUAUAUGACUCAUGUUCUUGUCGGCAAGUUGGCCUUGGCUAUAUUGGACUCUCUUCUUUUCAUGUAAGU
pyr-871	CAGCCAAGGAUGACUUGCCGG	vvi-MIR169c	-57.50	1.20	DangsuA,DangsuB	GGGAGUAGAAUGCAGCCAAGGAUGACUUGCCGGAGAUGGGGCAUUCCUCGUUAAUCCGGCAAGUUGUCCUUGGCUACAUUGGGCUCUCUU
pyr-871	CAGCCAAGGAUGACUUGCCGG	mdm-MIR169a	-72.90	1.00	DangsuA,DangsuB	AAGUCUCAGAGUGUUUGCAUCAAGCAGAAGAGAUCGGAAUGCAGCCAAGGAUGACUUGCCGGCUUUUACAGUAUCUUGCUCUAAUCAGCAGAGUCUUGCCGGCAAGUUGCUCUUGGCUACAUUUAGCUCUCUUCCUCUAAUGUCAGCCUCUGAGAUUU
pyr-871	CAGCCAAGGAUGACUUGCCGG	vvi-MIR169a	-60.60	1.19	DangsuA,DangsuB	GAGAGUGGAAUGCAGCCAAGGAUGACUUGCCGGAAUUUAUAUAUAGUGAGAAGAGAAGAGGCUAUAUGCUUUCACAUAUAUAGUGAACCCUGGCAAGUUGUCCUUGGCUACAUUUGAUUCUCUU
pyr-871	CAGCCAAGGAUGACUUGCCGG	gma-MIR169a	-55.40	0.97	DangsuA,DangsuB	AAGAGGAAGAGAGAGUGAUGCAGCCAAGGAUGACUUGCCGGCGUUAUUAUUUGCUCAUGUUCAUGCUCACCGGUUUCCUUGCCGGCAAGUUGUGUUUGGCUAUGUUUUGCUCUCUUCUUCU
pyr-871	CAGCCAAGGAUGACUUGCCGG	nta-MIR169r	-132.80	1.01	DangsuA,DangsuB	GAGUGGAUUGCAGCCAAGGAUGACUUGCCGGGAUGUUGUAGUCAAUGCAACGACUUAUCGGUAGGUCGUCCUUGGCUACAUUUUACUCUCUUCUGCUCAUGUAAGGCUCUAUAAGAUAUAUAUAUAAUUCGAGGUGAAGUCAGUAAUUGUUUCACAAAUUACAUCCAGUUGAAUUGCUCAUAAUUUGUCUAGAGAGUCAUUGCAUGAAGAGGUAGCGAGUGAAUUGCAGCCAAGGAGACUUGUCAAGAUGUUGCAGCCAAUGCAACGACUUAUCGGCAGGUCGUCCUUGGCUACAUUUCACUCUCU
pyr-871	CAGCCAAGGAUGACUUGCCGG	tcc-MIR169b	-54.90	0.89	DangsuA,DangsuB	GGAAAUGAGGCUAUGUGCUGCAGCCAAGGAUGACUUGCCGGAAAAGCUAUAUUUUACAUUAUAUUACCCUGUUCCCUGAUAUUAACUAUAUGCUUCUGUAUCAAUUUUAACUAUAAAUUAAUAAAAUUUAUAAUAAAUGUUAUAAGAGUUUAUCGGCAAGUCGUCUCUGGCUAUAUCACUGUUUCAUUUUCUC
pyr-871	CAGCCAAGGAUGACUUGCCGG	ptc-MIR169e	-47.80	0.66	DangsuA,DangsuB	UAUCGUGGCGCAGCCAAGGAUGACUUGCCGGCAAGCUCCUCACACGUAUUUUGUUUCGAGUUUCAUUGAUGGCAUUGCUAGAUAGAUAUAUAUGAUUUCGUAAUUCAAACUUUUGGGCCAUUGUCUGGUUGAAAUGAUCGGCAAGCUGUCCUUGGCUAUGUCUCUA
pyr-871	CAGCCAAGGAUGACUUGCCGG	nta-MIR169s	-94.10	1.01	DangsuA,DangsuB	CAACUUAUCGGCAGGUCGUCCUUGGCUACAUUUCACUCUCUUCUGCUCAUGUAAGGCUUUGUAAGACGCAUAUAUAGUUCGAGGUGAAGUCAGUGAUUGCGUUUCACAAAUCACAUCCAGUUGAAUUGCUCAUAAUUUGUCUAGAGAGUCAUUGCAUGAAGAGGUAGGGAGUGGAUUGCAGCCAAGGAUGACUUGCCGGGAUGUUGUAG
pyr-871	CAGCCAAGGAUGACUUGCCGG	ptc-MIR169g	-50.70	0.96	DangsuA,DangsuB	GAGUAGAAUGCAGCCAAGGAUGACUUGCCGGCAUUUCCUCCUAGGUAGCUAGCAAGCCUUCUAUUUGGCAUGCCUGUCCGGCAGGUUGUCCUUGGCUAAAUUUUGU
pyr-871	CAGCCAAGGAUGACUUGCCGG	ptc-MIR169f	-76.10	0.86	DangsuA,DangsuB	UUAUGUGGUGCAGCCAAGGAUGACUUGCCGGAAUAAGCUAUGAUCAAUAGCUAUAGCUAUGGUAUUUUUCAUCCUAGGUUUGGCUAUAUAUAUAUAUAUAUAUAGCCAGUUAAUUGCUAUAAAUCUCAGCACAUUUAUGUUUUAUAUGUCUGCACACAGACACACACAUCAUUGAAUGUUGAUGUUCCACCUCCUAUGAUCAGUAGUCAAUCGGCAAGUCAUCUCUGGCUACUCAACUC
pyr-871	CAGCCAAGGAUGACUUGCCGG	aly-MIR169b	-80.60	1.14	DangsuA,DangsuB	GUGCCCAACGGAGUAGAAUUGCAUGAAGUGGAGUAGAGUAUAAUGCAGCCAAGGAUGACUUGCCGGAACGUUGUUAAUCAUACGUAUAAAUUAUGUGAUGAACAUAUUUCUGGCAAGUUGUCCUUCGGCUACAUUUUGCUCUCUUCUUCUCAUGCAAACUCUCUUUGGGAUAU
pyr-871	CAGCCAAGGAUGACUUGCCGG	aly-MIR169c	-101.40	0.98	DangsuA,DangsuB	GUCUCAUCUAAAGCCUUGAAUGUGGGAAAAAGGCCAUUGUUGUUCAGCCAAGGAUGACUUGCCGGUAGCUUUGUAUAUUUACUCUAUAUUCGGUUUAUAUUAUGGAGAUUAUGCUUUAUAUAUAUAUAUACAUAGUUUUAAUUGAUUUUUUUUCGUACGUACGUAAUCUAAUACGAAAAAGUAUUUACUUAUUUAUAUGUGUGUUGGUGAGAUGUGUAAACAAAGCAAGCCCGGCAAGUCAUCUCUGGCUAUGCAACUGCCUCUUCCUCUCAUUCUAGGCUUACGAUGACAC
pyr-871	CAGCCAAGGAUGACUUGCCGG	mes-MIR169d	-47.00	1.07	DangsuA,DangsuB	GAGGUAGAGAGUGUAAUUCAGCCAAGGAUGACUUGCCGGAAGCACUGAUUAUACGGUCCGGCAAGUUGUUUCUUGGCUACAUUGUACUCUUUUCUUC
pyr-871	CAGCCAAGGAUGACUUGCCGG	tcc-MIR169l	-59.90	1.20	DangsuA,DangsuB	GAGAGGUAGAGAAUUUAGUGCAGCCAAGGAUGACUUGCCGGCGUAGACAAUACUCAAAUACUAAUUAUUAUUGUAUUUUUCCGGCAAGUCUGUCCUUGGCUACAUUGGUUUCUCUUCUUCUC
pyr-871	CAGCCAAGGAUGACUUGCCGG	ptc-MIR169p	-84.30	1.02	DangsuA,DangsuB	GGUGUAGGAGUUUUGCAUGAAGAGGUAGAGAGUAGAAUGCAGCCAAGGAUGACUUGCCGGCAUUUCCUCCCAGCUAGCUAGCAAGCCUUCUAUUUGGCAUGCCUGGCCGGCAGGAUGUCCUUGGCUAUAUUUUGUUCUCUUCUUCUCAUGUGAGACUCCAGGCC
pyr-871	CAGCCAAGGAUGACUUGCCGG	ptc-MIR169s	-47.40	0.82	DangsuA,DangsuB	AGAGUGUGAUUCAGCCAAGGAUGACUUGCCGGCAGCAGGUAAGAGCAAAGCUCCGUUUUUGGAAGUUCAAGGAUAUCUUAACUUUUCCGGCCGGCAAGCUGUCCUUGGCUACAUUGUACU
pyr-871	CAGCCAAGGAUGACUUGCCGG	zma-MIR169r	-55.90	0.87	DangsuA,DangsuB	GCAGCCAAGGAUGACUUGCCGGGUAUUUUGAGCAUGCAUGUUACAGGGGAGCAUAUGCAAUCUGUUUGGAAUUUUGAGCCCAUACCGUGCGGUGCCUGUCUUCCGGCAAGUUGUCCUUGGCUACAU
pyr-871	CAGCCAAGGAUGACUUGCCGG	vvi-MIR169j	-61.80	0.97	DangsuA,DangsuB	GAGAGUGGAGUGCAGCCAAGGAUGACUUGCCGGAAUUCACAUAUAGAGUGGAAUGAGGCAAUAGACCGGCCUCUUCUCAUGGUGUCCCUGGCAGGUUGUCCUUGGCUACCUUUCGCUCUCUU
pyr-871	CAGCCAAGGAUGACUUGCCGG	ata-MIR169d	-55.90	1.02	DangsuA,DangsuB	GAACGGGAUGCAGCCAAGGAUGACUUGCCGGCUCCUGGUGUUGGGAGUUCACUGAGCUUUAGAGUUAGCCGGCAAGUUGUCCUUGGCUACACCUAGUUCUC
pyr-871	CAGCCAAGGAUGACUUGCCGG	ath-MIR169c	-124.50	0.90	DangsuA,DangsuB	UCGUCCAUUAUGAGUAUUAAUUAUGGUUAGGGAAUCUUACAGAAUGAAAAUGAAGGUGUGAAUGGAUUGUCUCAUCUAAAGCCUUGAAUGUGGGAAAAAGGCCAUUGUUGUUCAGCCAAGGAUGACUUGCCGGUAGCUUGUAUUAUGAUUACUCUAUAUUCGAUUUAUAUUAUGGAGAUGAUGGUUUAUAUAUAUUUACUUAUCUACAUAGUUUUAGUUGAUUUUUUUUCGUACGUAAUAUAAUACGAAAAAGUAUUUACUUAUUUAUAUAUGUGUGUUGGGGCAAGAAGUGUAACCAAGCUAGCCCGGCAAGUCAUCUAUGGCUAUGCAACUGUCUCUUCCUCUCAUUCUAGGCUUACGAUGACACGUAAAAAAUCCCAAAUAUCACUAAUAUGAUAU…
pyr-871	CAGCCAAGGAUGACUUGCCGG	ath-MIR169b	-82.70	1.12	DangsuA,DangsuB	CCCAACGGAGUAGAAUUGCAUGAAGUGGAGUAGAGUAUAAUGCAGCCAAGGAUGACUUGCCGGAACGUUGUUAACCAUGCAUAUGAAUAAUGUGAUGAUUAAUUAUGUGAUGAACAUAUUUCUGGCAAGUUGUCCUUCGGCUACAUUUUGCUCUCUUCUUCUCAUGCAAACUUUCCUUGGG
pyr-871	CAGCCAAGGAUGACUUGCCGG	vun-MIR169	-53.20	0.97	DangsuA,DangsuB	AACAGAGAGUGAUGCAGCCAAGGAUGACUUGCCGGCGUUAUGCUGCAUGAUGCUUUUUACGGCGACUUUGCCGGCAAGUGGUUCUUGGCUACGUUUGGCUCUUUUCUUCU
pyr-871	CAGCCAAGGAUGACUUGCCGG	lus-MIR169j	-76.70	0.85	DangsuA,DangsuB	GAGAGCAUAGGCCUGAUAUGAAGAUGGAGAGACCGUGGUUCAGCCAAGGAUGACUUGCCGGGCGGCAUCCUGCUCCGAUCCGGUCCGAUCAUUCUCGGCUCGAUCCUCGGCAAGUUAUUCUUGGCUACAUUGCGCUCACUUGUUCUCAUUUCAGACCUCUCUAUGUUCUC
pyr-871	CAGCCAAGGAUGACUUGCCGG	lus-MIR169h	-79.30	0.82	DangsuA,DangsuB	CAUCGUAGAUGCUUGCAUGUGUGAAUAAGGGAUGUCCAAAAGCAGCCAAGGAUGACUUGCCGGCUGGCCGCCUCAGCCUGCUGCAUUUCUCGUUAUGUUUUUUCUUUCACCAUUUCAUUUUUUUCCUACUAAAGCUGUAAAGCCGGCCGGCAAGUCGUCUCGGGCUACUCUACUCCCUUCUUCUCUCAUGCUACAUUUUACGAUG
pyr-871	CAGCCAAGGAUGACUUGCCGG	cme-MIR169h	-62.30	0.77	DangsuA,DangsuB	UCAAGUGAUUCAGCCAAGGAUGACUUGCCGGCAAAACCAUUUAACUCUUUUUUUCUAAUUUCAAUUUUUUUUUUACUUCUCUAUUCUCGAGUUCAGUCGAUUAAAAUUCGAACUUCAAACAUCUAUUGAAGAUAUAUAAUAAUUUAACUAAUUGAAUUACAUUAAGAAUAGUCAACAAGUUGUACUAAAAAAAAUUAAUCGAGGAAAUGUAUGUAUAUAGUAAUGUUUUUUUGAACUUUUAUUUUGUUUACUUUUGGUCGGCAAGGCGUCUUUGGCUAUAUAACUUCC
pyr-871	CAGCCAAGGAUGACUUGCCGG	lus-MIR169f	-85.20	0.93	DangsuA,DangsuB	UGAUUUUGCGAAGUAGAACAUAGGCCUGAGAUGAAGACGGAGAGAGCGUGGUUCAGCCAAGGAUGACUUGCCGGACGGCUAGCUCCGGUUGUCAGCUCCAUCGUCGGCAAGUUGUUCUUGGCUACAUUGCGCUCACUUGUUCUCAUUUCAGACCUCUCUAUGUUCUCCCAUUUGGCAACUUCA
pyr-871	CAGCCAAGGAUGACUUGCCGG	cme-MIR169f	-57.20	0.94	DangsuA,DangsuB	GAGUUGAAUGCAGCCAAGGAUGACUUGCCGGCGAUUUAUAUCGCCGGCCAGCGUCAAUGUGGGGCGGCGCGGCGGCAAGUCGUCCUUGGCUACCUUGAGUUC
pyr-871	CAGCCAAGGAUGACUUGCCGG	ptc-MIR169d	-60.20	0.94	DangsuA,DangsuB	GAGUCGAAUGCAGCCAAGGAUGACUUGCCGGCAUUUCCUCCUAAGUAGCGAGCCCGGCAAGGCUUCUAUUUGGCACGCCCGGCCGGCGGGUUGUCCUUGGCUAUAUUUGGU
pyr-871	CAGCCAAGGAUGACUUGCCGG	bna-MIR169n	-73.00	1.14	DangsuA,DangsuB	AGAAUUGCAUGAAGUGGAGUAGAGUAUAAUGCAGCCAAGGAUGACUUGCCGGAGGGUCGUUCAUCAUGCAUAAUAAUAUUGGUGAUGAACAUAAUUCUGGCAAGUUGCCCUUCGGCUACAUUUUGCUCUCUUCUACUCAUGCAAACUCUC
pyr-871	CAGCCAAGGAUGACUUGCCGG	mtr-MIR169g	-80.60	0.91	DangsuA,DangsuB	AUAUGCAGCCAAGGAUGACUUGCCGGCGAGCCUCUUUCGAUACUUUUAUGACAUAAUUAAUCAUGUGGAUAGCCAAGGUACUAAACUCACUUUGCACUAAAACAAAUAUUUUUGCUUUAGUGCAAACUUAGUUUAGGCGCUUCGCAACGGCUAGUCAAAUGUCCUAGUUCCAAUGUGAUUGGUUGUCCGGCAAGUCGUCUCUGGCUACGUA
pyr-871	CAGCCAAGGAUGACUUGCCGG	sbi-MIR169b	-52.50	1.01	DangsuA,DangsuB	CAGCCAAGGAUGACUUGCCGGAUAUGUGCAUGCAUAUGUUACAAGGCAGCAUAUGCACCCUGUUACAAGCCUGCCUGUUCUCCGGCAAGUUGUCCUUGGCUA
pyr-871	CAGCCAAGGAUGACUUGCCGG	mtr-MIR169b	-30.30	0.92	DangsuA,DangsuB	GAGUGCAGCCAAGGAUGACUUGCCGGUAAUAUAUCUAAUUCCUUGGUUUCUUCCGGCAAGUUGUUCUUGACUACAUU
pyr-871	CAGCCAAGGAUGACUUGCCGG	mtr-MIR169l	-69.10	1.08	DangsuA,DangsuB	GCAGAGAGUGUAGUACAGCCAAGGAUGACUUGCCGGCCGGCGUUAGUGAAGGCAAAGGCAAAUGAUCAUUCAUGUUCAUGCAUGCAUAUUCUCCGGCCGGCAAGUUUUUCCUUGGCUAUAUUGGACUUUCUUC
pyr-871	CAGCCAAGGAUGACUUGCCGG	rco-MIR169b	-36.80	0.86	DangsuA,DangsuB	UAAUUCAGCCAAGGAUGACUUGCCGGCACAGCCUAUAUAUGUCUUCUACUCACAGCUGCUAGCUACCGGCAAGUUGUUCUUGGCUACAUUGUA
pyr-871	CAGCCAAGGAUGACUUGCCGG	sbi-MIR169k	-46.70	0.99	DangsuA,DangsuB	CAGCCAAGGAUGACUUGCCGGCUCCUCAAAUUUGAAGCGUCGUCUAAGCUGCUGAGGCUUAAUAAAAACUUAGUCGGCAAGUCUGUCCUUGGCUACA
pyr-871	CAGCCAAGGAUGACUUGCCGG	rco-MIR169a	-38.50	1.37	DangsuA,DangsuB	GAAUACAGCCAAGGAUGACUUGCCGGCAUCAAUUUAUAUAUAUAUAUAUAUAUAUAUAUAUUUAUCGGCAAGCUGUUCUUGGCUAUAUUCAU
pyr-871	CAGCCAAGGAUGACUUGCCGG	ppe-MIR169c	-86.20	1.11	DangsuA,DangsuB	UCAUCUAAAGUCUUGCAUGUGGAAAUGAGGCGUGUGGUGCAGCCAAGGAUGACUUGCCGGCAAUACUUAGCUUGUCAUUCUCCAAUGCAUGCAUGUUGUUGUGAGAAUGAGCUGAUCGGCAAGUCGUCUCUGGCUACAUUAUUGCCUCCUUUUCUCAUGCUAGAUUUAUGAUGA
pyr-871	CAGCCAAGGAUGACUUGCCGG	ppe-MIR169b	-79.30	1.10	DangsuA,DangsuB	AGUCUCAGAGUGUUUACAUGAAGCACUAGAGAUUGGAUUGCAGCCAAGGAUGACUUGCCGGCAUUUACAGUACUCUUGCUUUAUGCAGCUGAGGUUUGCCGGCAAGUUGUCUUUGGCUACAUUUUGCUCUCUUCUUCUCAUGUCAGCCUCUGAGACU
pyr-871	CAGCCAAGGAUGACUUGCCGG	ppe-MIR169a	-78.20	1.10	DangsuA,DangsuB	AGUCUCAGAGUGUUUACAUGAAGCACAAGAGAUUGGAUUGCAGCCAAGGAUGACUUGCCGGCAUUUACAGUACUCUUGCUUUAUGCAGUUGAGGUUUGCCGGCAAGUUGUCUUUGGCUACAUUUUGCUCUCUUCUUCUCAUGUCAGCCUCUGAGACU
pyr-871	CAGCCAAGGAUGACUUGCCGG	zma-MIR169c	-69.10	0.95	DangsuA,DangsuB	AUGAGGUAGAGAACGGGAUGCAGCCAAGGAUGACUUGCCGGCUCCUGGAACCUGGAGGCGUCUCAGCUUGCUGUGCUGUGGCUUAGAACUUAGUCGGCAAGUCUGUCCUUGGCUACACCUAGUUCUCUUCCUCU
pyr-871	CAGCCAAGGAUGACUUGCCGG	ptc-MIR169h	-45.60	0.79	DangsuA,DangsuB	GAGUGUAAUUCAGCCAAGGAUGACUUGCCGGCAGCACGGGAUCUCAGAGCUUAAUAACUAGAAGAUCAAGGCUGUCAUUACUUUUCCGGCCGGCAAGUUGCCCUUGGCUACAUUGUAC
pyr-871	CAGCCAAGGAUGACUUGCCGG	mes-MIR169c	-45.80	1.07	DangsuA,DangsuB	CAGCCAAGGAUGACUUGCCGGCUAGCUCUAGUAUACUAGUAUGCUUAUAUUUUUCCAUUUAACUGGCAACUAGAUGGUCGGCAAGUCAUCUCUGGCU
pyr-872	CAGCCAAGGAUGACUUGCCGA	bdi-MIR169a	-88.30	0.91	DangsuA,DangsuB	GGAAGGGUAGGAUACGUUUUUGCUUGCCCGUGGCCGCGCUAACAUUAGGCUUGGGGACUAUGGUGCAGCCAAGGAUGACUUGCCGAUCGAAACGAUGCACAAUAUGCAUCGAUCGGCGAGUUGUUCUUGGCUACAUCUUAGCUCCUGCCCCUCAUGUUAGGCCGGCAUGCGGUGGUAUGUA
pyr-872	CAGCCAAGGAUGACUUGCCGA	mes-MIR169g	-41.00	1.00	DangsuA,DangsuB	UAUGCAGCCAAGGAUGACUUGCCGACCAGUGGCCUAUUCAAGAAGAAGCAAAAGACCAAGUUGGCAAGUUGUCCUUGGCUACAUG
pyr-872	CAGCCAAGGAUGACUUGCCGA	nta-MIR169p	-58.60	1.30	DangsuA,DangsuB	GAGUGGAUUGCAGCCAAGGAUGACUUGCCGAGAUGUUGUAGCCAAUGCAACGACUUAUCGGCAGGUCGUCCUUGGCUACAUUUCACUCUUU
pyr-872	CAGCCAAGGAUGACUUGCCGA	nta-MIR169e	-142.10	1.10	DangsuA,DangsuB	GAGUAGAUUGCAGCCAAGGAUGACUUGCCGAGAUGUUGUAGCUAAUGCAACGACUUAUCGGCAGGUCGUCCUUGGCUACAUUUUACUCUCUUCUGCUCAUGUAAGUCUCUGAAAUGCAUAUAUAUAAUUCAGAGGUAAAGUUAUCACACAUCACAUCCAGUUGAAUUGCUCACAAUUUGUCUAGAGAGUCAUUGCAUGAAGAGGUAGGGAGUGGAUUGCAGCCAAGGAUGACUUGCCGAGAUGUUGUAGCCAAUGCAAUGACUUAUCGGCAGGUCGUCCUUGGCUACAUUUUACUCU
pyr-872	CAGCCAAGGAUGACUUGCCGA	nta-MIR169d	-58.20	1.35	DangsuA,DangsuB	GAGUAGAUUGCAGCCAAGGAUGACUUGCCGAGAUGUUGUAGCUAAUGCAACGACUUAUCGGCAGGUCGUCCUUGGCUACAUUUUACUCUCU
pyr-872	CAGCCAAGGAUGACUUGCCGA	nta-MIR169g	-142.10	1.10	DangsuA,DangsuB	GAGUAGAUUGCAGCCAAGGAUGACUUGCCGAGAUGUUGUAGCUAAUGCAACGACUUAUCGGCAGGUCGUCCUUGGCUACAUUUUACUCUCUUCUGCUCAUGUAAGUCUCUGAAAUGCAUAUAUAUAAUUCAGAGGUAAAGUUAUCACACAUCACAUCCAGUUGAAUUGCUCACAAUUUGUCUAGAGAGUCAUUGCAUGAAGAGGUAGGGAGUGGAUUGCAGCCAAGGAUGACUUGCCGAGAUGUUGUAGCCAAUGCAAUGACUUAUCGGCAGGUCGUCCUUGGCUACAUUUUACUCU
pyr-872	CAGCCAAGGAUGACUUGCCGA	nta-MIR169f	-91.50	1.04	DangsuA,DangsuB	AACGACUUAUCGGCAGGUCGUCCUUGGCUACAUUUCACUCUUUUCUGCUCAUGUAAGGCUCUGUAAGACGCAUAUAUAGUUCGAGGUGAAGUCAGUAAUUGCGUUUCACAAAUCAUAUCCAGUUGAAUUGAUCUUAAUUUGUCCAAAGAGUCAUUGCAUGAAGAGGUAGAGAGUGGAUUGCAGCCAAGGAUGACUUGCCGAGAUGUUGUA
pyr-872	CAGCCAAGGAUGACUUGCCGA	nta-MIR169a	-137.20	1.03	DangsuA,DangsuB	GAGUGGAUUGCAGCCAAGGAUGACUUGCCGAGAUGUUGUAGCCAAUGCAAUGACUUAUCGGCAGGUCGUCCUUGGCUACAUUUUACUCUCUUCUGCUCAUGUAAGGCUCUGAAAGACAUAUAUAAUUCGAGGUGAAGUCAGUGAUUGAGUUUCACAAAUCACAUCCAAUUGAAUUGCUCAUGAUUUGUCUAGAGAGUCAUUGCAAGAAAAGGUAGGGAGUGGAUUGCAGCCAAGAAUGACUUGCCGAGAUGUUGUAGCCAAUGCAAUGACUUAUUGGCAGGUCGUCCUUGGCUACAUUUUACUCUCU
pyr-872	CAGCCAAGGAUGACUUGCCGA	nta-MIR169c	-137.20	1.03	DangsuA,DangsuB	GAGUGGAUUGCAGCCAAGGAUGACUUGCCGAGAUGUUGUAGCCAAUGCAAUGACUUAUCGGCAGGUCGUCCUUGGCUACAUUUUACUCUCUUCUGCUCAUGUAAGGCUCUGAAAGACAUAUAUAAUUCGAGGUGAAGUCAGUGAUUGAGUUUCACAAAUCACAUCCAAUUGAAUUGCUCAUGAUUUGUCUAGAGAGUCAUUGCAAGAAAAGGUAGGGAGUGGAUUGCAGCCAAGAAUGACUUGCCGAGAUGUUGUAGCCAAUGCAAUGACUUAUUGGCAGGUCGUCCUUGGCUACAUUUUACUCUC
pyr-872	CAGCCAAGGAUGACUUGCCGA	nta-MIR169b	-142.10	1.09	DangsuA,DangsuB	GAGUAGAUUGCAGCCAAGGAUGACUUGCCGAGAUGUUGUAGCUAAUGCAACGACUUAUCGGCAGGUCGUCCUUGGCUACAUUUUACUCUCUUCUGCUCAUGUAAGUCUCUGAAAUGCAUAUAUAUAAUUCAGAGGUAAAGUUAUCACACAUCACAUCCAGUUGAAUUGCUCACAAUUUGUCUAGAGAGUCAUUGCAUGAAGAGGUAGGGAGUGGAUUGCAGCCAAGGAUGACUUGCCGAGAUGUUGUAGCCAAUGCAAUGACUUAUCGGCAGGUCGUCCUUGGCUACAUUUUACUCUCU
pyr-872	CAGCCAAGGAUGACUUGCCGA	nta-MIR169m	-143.70	1.06	DangsuA,DangsuB	GAGUGGAUUGCAGCCAAGGAUGACUUGCCGAGAUGUUGUAGCCAAUGCAACGACUUAUCGGCAGGUCGUCCUUGGCUACAUUUCACUCUUUUCUGCUCAUGUAAGGCUCUGUAAGACGCAUAUAUAGUUCGAGGUGAAGUCAGUAAUUGCGUUUCACAAAUCAUAUCCAGUUGAAUUGAUCUUAAUUUGUCCAAAGAGUCAUUGCAUGAAGAGGUAGAGAGUGGAUUGCAGCCAAGGAUGACUUGCCGAGAUGUUGUAGCUAAUGCAACGACUUAUCUGCAGGUCGUCCUUGGCUACAUUUAGCUCU
pyr-872	CAGCCAAGGAUGACUUGCCGA	nta-MIR169l	-58.20	1.39	DangsuA,DangsuB	GAGUAGAUUGCAGCCAAGGAUGACUUGCCGAGAUGUUGUAGCUAAUGCAACGACUUAUCGGCAGGUCGUCCUUGGCUACAUUUUACUCU
pyr-872	CAGCCAAGGAUGACUUGCCGA	nta-MIR169o	-91.50	1.04	DangsuA,DangsuB	AACGACUUAUCGGCAGGUCGUCCUUGGCUACAUUUCACUCUUUUCUGCUCAUGUAAGGCUCUGUAAGACGCAUAUAUAGUUCGAGGUGAAGUCAGUAAUUGCGUUUCACAAAUCAUAUCCAGUUGAAUUGAUCUUAAUUUGUCCAAAGAGUCAUUGCAUGAAGAGGUAGAGAGUGGAUUGCAGCCAAGGAUGACUUGCCGAGAUGUUGUA
pyr-872	CAGCCAAGGAUGACUUGCCGA	sly-MIR169c	-80.50	1.32	DangsuA,DangsuB	GUCUAGAGAGUUAUUGUAUGAAGAGGUAGGGAGUGGAGUGCAGCCAAGGAUGACUUGCCGAGAUGUUGUAGCCUAAUGCAAUGACAUAUCGGCAGGUCAUCUUUGGCUACAUUUUAUUCUCUCCUAUUCAUGUAAAACUUUAUAGAC
pyr-872	CAGCCAAGGAUGACUUGCCGA	nta-MIR169i	-137.20	1.03	DangsuA,DangsuB	GAGUGGAUUGCAGCCAAGGAUGACUUGCCGAGAUGUUGUAGCCAAUGCAAUGACUUAUCGGCAGGUCGUCCUUGGCUACAUUUUACUCUCUUCUGCUCAUGUAAGGCUCUGAAAGACAUAUAUAAUUCGAGGUGAAGUCAGUGAUUGAGUUUCACAAAUCACAUCCAAUUGAAUUGCUCAUGAUUUGUCUAGAGAGUCAUUGCAAGAAAAGGUAGGGAGUGGAUUGCAGCCAAGAAUGACUUGCCGAGAUGUUGUAGCCAAUGCAAUGACUUAUUGGCAGGUCGUCCUUGGCUACAUUUUACUCUC
pyr-872	CAGCCAAGGAUGACUUGCCGA	nta-MIR169h	-48.50	1.13	DangsuA,DangsuB	GAGUGGAUUGCAGCCAAGGAUGACUUGCCGAGAUGUUGUAGCUAAUGCAACGACUUAUCUGCAGGUCGUCCUUGGCUACAUUUAGCUCUUU
pyr-872	CAGCCAAGGAUGACUUGCCGA	nta-MIR169k	-137.20	1.03	DangsuA,DangsuB	GAGUGGAUUGCAGCCAAGGAUGACUUGCCGAGAUGUUGUAGCCAAUGCAAUGACUUAUCGGCAGGUCGUCCUUGGCUACAUUUUACUCUCUUCUGCUCAUGUAAGGCUCUGAAAGACAUAUAUAAUUCGAGGUGAAGUCAGUGAUUGAGUUUCACAAAUCACAUCCAAUUGAAUUGCUCAUGAUUUGUCUAGAGAGUCAUUGCAAGAAAAGGUAGGGAGUGGAUUGCAGCCAAGAAUGACUUGCCGAGAUGUUGUAGCCAAUGCAAUGACUUAUUGGCAGGUCGUCCUUGGCUACAUUUUACUCUCU
pyr-872	CAGCCAAGGAUGACUUGCCGA	nta-MIR169j	-53.50	1.27	DangsuA,DangsuB	AGUAGAUUUGCAGCCAAGGAUGACUUGCCGAGAUGUUGUAGCUAAUGCAACGACUUAUCGGCAGGUCGUCCUUGGCUACAUUUUACUUCUC
pyr-872	CAGCCAAGGAUGACUUGCCGA	ptc-MIR169a	-53.90	0.90	DangsuA,DangsuB	AAGUGGUAUGCAGCCAAGGAUGACUUGCCGACUUAACUGAUCUGUAUAAAUUAAUGCAUGUGUAGUCAAAAUUACUACUACUAUAUAUUAAUCUGAUCUGUGACCACAAAUUAACUAACUACUAGCUAGUAAUUAGUUGGCAAGUUGUCCAUGGCUACAUGCUGC
pyr-872	CAGCCAAGGAUGACUUGCCGA	tcc-MIR169a	-57.10	0.84	DangsuA,DangsuB	UAGGCACAGAAAGUGAAGUGCAGCCAAGGAUGACUUGCCGAUUCUCCCUCUUGCAUCCAUUCAGUUUUGCCAACACCAGCAACUCAUAUGUAGAGACGAAUUUAAAUCGGCAGGUUGUCCUUGGCUACAUGUUUCUUUCUGCUCCAC
pyr-872	CAGCCAAGGAUGACUUGCCGA	ptc-MIR169c	-43.70	0.99	DangsuA,DangsuB	AAGUUUGAUGCAGCCAAGGAUGACUUGCCGACGACUCAAUUUUUGCUUCCAUAUGGUAGAAGAGAUGAAUAGGUUGGCAGGUUUUCCUUGGCUACAUUUUCC
pyr-872	CAGCCAAGGAUGACUUGCCGA	ptc-MIR169b	-44.90	0.96	DangsuA,DangsuB	AAGAUUGAUGCAGCCAAGGAUGACUUGCCGACGACUCGUUUUUGCUUCCAUCAAUAUACGCAUAAUUAAGAAGAGAUGAAUCCGUUGGCAGGUUGUUCUUGGCUACAUUUUUC
pyr-872	CAGCCAAGGAUGACUUGCCGA	tcc-MIR169e	-52.90	0.90	DangsuA,DangsuB	UAGGCACAGAAAGUGAAGUGCAGCCAAGGAUGACUUGCCGAUUCUUUCUCUUAUAUCCAUUCAGUUUUACCAACACUAGCAACUCAUAUGUAAAGACGAAUUUAAAUCGGCAAGUUGUCCUUGGCUACAUGUUUCUUUUUGCUCCAC
pyr-872	CAGCCAAGGAUGACUUGCCGA	aly-MIR169a	-88.40	1.00	DangsuA,DangsuB	AACGCGUAUGUGACGAAAGUAGUGUGCAGCCAAGGAUGACUUGCCGAUUUAAAUGAUCUUUCUUUAUACUCUAUUAAGACAUUUUAAGUUUCAAAUUUCUUUGGUUCUUCAAGGAUUAAGGAAGAAAGUAGGCUAUAUAUGUAGAUAUAUAUAUUAUGCUGUAUUAAAUAUAUGUACAAGAUAAGACCAAAAAAGAAAAAGUAACAAUCAUGAUCGGCAAGUUGUCCUUGGCUACACGUUACUUUGUGUCGCGCAUAGGUGUU
pyr-872	CAGCCAAGGAUGACUUGCCGA	gma-MIR169b	-68.40	1.10	DangsuA,DangsuB	UAUGAUGCUGCAGCCAAGGAUGACUUGCCGAUAAAUUCUUUCUCUAAUUUGACUUUCAAUUCAUGUUUGUCAAUUGAUAGUGCAUUAGUUCUAAUAUAUGCAUUUGAUUAUAUAGAACACUAUUGUGAAAGUGUCUUUAGGGAUAGGGUAAAUUCGGCAAGUCAUCUUUGGCUACAUGUCUAU
pyr-872	CAGCCAAGGAUGACUUGCCGA	ata-MIR169f	-41.50	0.83	DangsuA,DangsuB	GAGUGGAAUGCAGCCAAGGAUGACUUGCCGACAGCACACAACAAGGUGGUAGUAAUCUUGCCGGCAAGUCCGUCCUUGGCUACACCUUGCUCU
pyr-872	CAGCCAAGGAUGACUUGCCGA	ata-MIR169g	-47.10	1.07	DangsuA,DangsuB	GACUAUGGUGCAGCCAAGGAUGACUUGCCGAUCGAACAAUGAUACAUCAUCAUAUCAUAUACAUUGAUCCAUCGGCGAGUUGUUCUUGGCUACAUCUUAGCU
pyr-872	CAGCCAAGGAUGACUUGCCGA	ata-MIR169e	-41.50	0.83	DangsuA,DangsuB	GAGUGGAAUGCAGCCAAGGAUGACUUGCCGACAGCACACAACAAGGUGGUAGUAAUCUUGCCGGCAAGUCCGUCCUUGGCUACACCUUGCUCU
pyr-872	CAGCCAAGGAUGACUUGCCGA	vvi-MIR169g	-51.00	0.85	DangsuA,DangsuB	GAAAGUAUGGUGCAGCCAAGGAUGACUUGCCGACUCUCUACUUAGCCAUCUGCCUUUCUCCAAGGAGGCUUGCAGUACUGAUGAAGCCGGCAAGUUGUCUUUGGCUACAUGCUUCUUUCUG
pyr-872	CAGCCAAGGAUGACUUGCCGA	ath-MIR169a	-74.80	1.07	DangsuA,DangsuB	GUGACGAAAGUAGUGUGCAGCCAAGGAUGACUUGCCGAUUUAAAUGAUCUUUCUUUAUACUCUAUUAAGACAAUUUAGUUUCAAACUUUUUUUUUUUUUUUUUUUUGAAGGAUUCAGGAAGAAAUUAGGAUAUAUUAUUCCGUAUAAAAUACAAGAUAUAUAAAACCAAAAAGAAAAAGUAACAUGAUCGGCAAGUUGUCCUUGGCUACACGUUACUUUGUGUCGC
pyr-872	CAGCCAAGGAUGACUUGCCGA	lus-MIR169l	-57.90	0.93	DangsuA,DangsuB	GUGGGUAUGCAGCCAAGGAUGACUUGCCGACUACUGCCUCUCUUCCAUGGUUCUUUUAGAUCAAAUGAGCUUUGAUCAUCAUUGGUUGAUUUGAUUGUGUUGGUGGUGGUUGGCAAGUUGUCUGUGGCUAUAUUCCUGU
pyr-872	CAGCCAAGGAUGACUUGCCGA	tcc-MIR169c	-59.50	0.96	DangsuA,DangsuB	UAGGCCUAGAAAGGAUGGUGCAGCCAAGGAUGACUUGCCGACUACUCCCUCCAGCCUUUGCUGUACUGUUUUUUAUAUUGAAAAAAUGGAUAUAGAUGAAGUGGGCAAGUCGUCUUUGGCUACAUUUUUCUUUCUCCUCCUC
pyr-872	CAGCCAAGGAUGACUUGCCGA	osa-MIR169a	-98.60	1.01	DangsuA,DangsuB	CGCCGGCGGCCUGACAUUGGGAUCGGAGGCCAUGGUGCAGCCAAGGAUGACUUGCCGAUCGAUCGAUCUAUCUAUGAAGCUAAGCUAGCUGGCCAUGGAUCCAUCCAUCAAUUGGCAAGUUGUUCUUGGCUACAUCUUGGCCCCUGCUCCUCAUGUAAGGCCGGCCUGUGGCG
pyr-872	CAGCCAAGGAUGACUUGCCGA	lus-MIR169g	-64.50	0.83	DangsuA,DangsuB	GCCGUCAAUGUAAAAGGGAGAAAUGUAAUGUGCAGCCAAGGAUGACUUGCCGAUCGACCCGCGAACCCAAUUUGCUCCGGGCUUAUCGAUCGAUUGAUAUUGAUGGAUCGGCAAGUUGGUCCUUGGCUACAUCUUCUUUUUUCCCUUCAUCUCAUCCUUGGC
pyr-872	CAGCCAAGGAUGACUUGCCGA	vvi-MIR169f	-47.00	0.72	DangsuA,DangsuB	GAUAUUAUGGUGCAGCCAAGGAUGACUUGCCGAAAAUAAUUUGCUCGAUCGUUAAUGUGCUUCUCCAGUUUCUAUUGCAAUUUAUGCAUAGGGCAAUAUAUAUAUCCUUUAUAGCUUGUUAAUUCAGAUAUUGACUGAGGAAUCAAUAAUGGGCAAGUUGUGUUUGGCUACAUGUUUAUCUCAU
pyr-872	CAGCCAAGGAUGACUUGCCGA	mtr-MIR169a	-60.40	1.06	DangsuA,DangsuB	AAGAGGCAGAGAGAGUAAUGCAGCCAAGGAUGACUUGCCGACAACAUUGGCGAAUGUUCAUGUGAUUUCUGCCUCAUUGUGCCGGCAAGUUGUCCUUGGCUAUGUUAGUCUCUCAUCUUCU
pyr-872	CAGCCAAGGAUGACUUGCCGA	sbi-MIR169a	-45.90	1.07	DangsuA,DangsuB	CAGCCAAGGAUGACUUGCCGAUCGAUCGAUGCAAACUCCUCUGAUGUCUGAUCUCAUCAGAUUAUCGUUGUCGGCAAGUUGUUCUUGGCUA
pyr-872	CAGCCAAGGAUGACUUGCCGA	bna-MIR169b	-68.40	1.07	DangsuA,DangsuB	GUGACCAAAGUAGUGUGCAGCCAAGGAUGACUUGCCGAUUUGAAAUAUAUUUUUAAUACUUUACUAAGACAUCUUUUCAGUUUCAAAUUUGUCUUGGAGAGGCUAGGAAGAAAUUACAAUUUAUUUCGUAGUUUAAAGAAAAAAUAUGAUCGGCAAGUUUUCCUUGGCUACAUGUUUCUUUGUGUCGC
pyr-872	CAGCCAAGGAUGACUUGCCGA	bna-MIR169a	-57.20	1.19	DangsuA,DangsuB	UGUGACCAAAGUAGUGUGCAGCCAAGGAUGACUUGCCGAUUUAAAAUAUCUGAUAAGUAUUUUAUUUCGUAUUUUAAAGAAAAAAAUCAUGAUCGGCAAGUUGUCCUUGGCUAUACGUUUCUUUGUGUCGCG
pyr-872	CAGCCAAGGAUGACUUGCCGA	zma-MIR169b	-79.30	0.93	DangsuA,DangsuB	UAGGCUCGGGGACUACGGUGCAGCCAAGGAUGACUUGCCGAUCUAUCGUCGAUCAACGAGCGACGCCUCUGAUGUCUGAUCUCGACAUCUAUCGUCGUCAGACCAUCAUCAUCUAUCGGCAAGUUGUUCUUGGCUACACCGUGGCUCCUGCUCCUG
pyr-872	CAGCCAAGGAUGACUUGCCGA	zma-MIR169a	-70.20	0.94	DangsuA,DangsuB	UAGGCUCGGGGACUAUGGUGCAGCCAAGGAUGACUUGCCGAUCGAUGUGACGCCUCUUGAUCUCGUCGUCGUCAGAUCGUCGCCGAUCAUCGGCAAGUUGUUCUUGGCUACACCGUGGCUCCUGCUCCUG
pyr-3558	AGAAUCUUGAUGAUGCUGCAG	mdm-MIR172n	-49.00	1.07	DangsuA,DangsuB	GGUCACUUUUUGCGGGUGGAGCAUCAUCAAGAUUCACAAUCUUACUUGGGUUCUAGUUUUAACCCCAUUUGAUGAUAUGAGAAUCUUGAUGAUGCUGCAGCAGCAAUAAAUGACU
pyr-3558	AGAAUCUUGAUGAUGCUGCAG	mdm-MIR172o	-49.80	1.06	DangsuA,DangsuB	AGUCACUUUUUGCGGGUGGAGCAUCUUCAAGAUUCACAAUCUUAUUUGGGCUCCAAUUUUAGCCCCAUUUGAUGAUAUGAGAAUCUUGAUGAUGCUGCAGCGGCAAUAAAUGACU
pyr-3558	AGAAUCUUGAUGAUGCUGCAG	ath-MIR172d	-48.70	1.11	DangsuA,DangsuB	AGUCAUUGUUUGCUAUUGCAACAUCUUCAAGAUUCAGAAAUCAGAUUCUCUUAUGGGUUUUCUUUUGAGCCUUUAUUUUUUGGUUUGAGAAUCUUGAUGAUGCUGCAGCGGCAAUUAAAUGGCU
pyr-3558	AGAAUCUUGAUGAUGCUGCAG	ath-MIR172c	-54.90	1.12	DangsuA,DangsuB	AGCUACUGUUCGCUGUUGGAGCAUCAUCAAGAUUCACAAAUCAUCAAGUAUUCGUGUAAAUAAACCCAUUUAUGAUUAGAUUUUUGAUGUAUGUAUGAGAAUCUUGAUGAUGCUGCAGCUGCAAUCAGUGGCU
pyr-3558	AGAAUCUUGAUGAUGCUGCAG	lja-MIR172a	-61.20	1.15	DangsuA,DangsuB	GCUGGUGGAGCAUCAUCAAGAUUCACAAGCUUUAAGGGGUGGAUUGUGUUUGGGGUGGUCCCUAAUUGCUCCAUAUCAAUUUGCUCUUUGAUUUGAGAAUCUUGAUGAUGCUGCAGUAGC
pyr-3558	AGAAUCUUGAUGAUGCUGCAG	nta-MIR172a	-51.80	1.10	DangsuA,DangsuB	UUUUGCAGAUGCAGCAUCUUCAAGAUUCACAUAUAGUAUAUUUUAUGGAGUUCAAUUGUGGGAGAAAAAAAUUAAAUUUUCUUGCUCCCUAUGGCUCCUUAAUUUAAUAUGAGAAUCUUGAUGAUGCUGCAGCAGCAAUGAA
pyr-3558	AGAAUCUUGAUGAUGCUGCAG	mdm-MIR172b	-49.80	1.06	DangsuA,DangsuB	AGUCACUUUUUGCGGGUGGAGCAUCUUCAAGAUUCACAAUCUUAUUUGGGCUCCAAUUUUAGCCCCAUUUGAUGAUAUGAGAAUCUUGAUGAUGCUGCAGCGGCAAUAAAUGACU
pyr-3558	AGAAUCUUGAUGAUGCUGCAG	mdm-MIR172c	-49.00	1.07	DangsuA,DangsuB	GGUCACUUUUUGCGGGUGGAGCAUCAUCAAGAUUCACAAUCUUACUUGGGUUCUAGUUUUAACCCCAUUUGAUGAUAUGAGAAUCUUGAUGAUGCUGCAGCAGCAAUAAAUGACU
pyr-3558	AGAAUCUUGAUGAUGCUGCAG	bna-MIR172d	-49.10	1.12	DangsuA,DangsuB	UUUUUGCUAUUGCAUCAUCAUCAAGAUUCAGAAAUCAUAUUCCUUGAUGGGUUCUCCUUCGAGCCUGUCUUUUUUGGUUUGAGAAUCUUGAUGAUGCUGCAGCGGCGAUUAAA
pyr-3558	AGAAUCUUGAUGAUGCUGCAG	bra-MIR172c	-58.20	1.00	DangsuA,DangsuB	UUCAGACUUUGAAGCAGUUGCAGUCAUUUUUUGCUAUUGCAUCAUCAUCAAGAUUCAGAAAUCAUAUUCCUUGAUGGGUUCUCCUUCGAGCCUGUCUUUUUUGGUUUGAGAAUCUUGAUGAUGCUGCAGCGGCGAUUAAAUGGCUUUUUUAU
pyr-3558	AGAAUCUUGAUGAUGCUGCAG	aly-MIR172f	-59.70	1.22	DangsuA,DangsuB	AGCUACUGUUCGCUGUUGGAGCAUCAUCAAGAUUCACAAAUCAUCAAGUAUUCGUGUAAAUGAACCCAUUUAUAAUUAUAUUGUUGAUGUAUGUAUGAGAAUCUUGAUGAUGCUGCAGCUGCAAUCAGUGGCU
pyr-3558	AGAAUCUUGAUGAUGCUGCAG	mtr-MIR172d	-52.30	1.11	DangsuA,DangsuB	AGUCAGUGUUUGCUAGUGGAGCAUCAUCAAGAUUCACAAGCUUUAUAGGGCUUCAAAUCAAUUAGCCCUUCUUCAUGUUAUGAGAAUCUUGAUGAUGCUGCAGCAGCAAUUGAUGACU
pyr-3558	AGAAUCUUGAUGAUGCUGCAG	aly-MIR172d	-55.60	0.99	DangsuA,DangsuB	GAUUCAGAAUUUGAAGUUAGUGGCAGUCAUUGUUUGCUAUUGCAACAUCUUCAAGAUUCAGAAAUCAGAUUCUUUUAUGGGUUUUCUUUUGAGCCUAUAUUAUUUGGUUUGAGAAUCUUGAUGAUGCUGCAGCGGCAAUUAAAUGGCUUAUUUAUCUAGGGUU
pyr-3558	AGAAUCUUGAUGAUGCUGCAG	gra-MIR172b	-59.70	1.33	DangsuA,DangsuB	GUUUGCUGCUGCAGCAUUAUCAAGAUUCACAAGAGGCGUUUUAGGGUCUUUUUUGAUUGAUUGAUCAAUCAAUAAGCCCUUUUAUGAUUGAGAAUCUUGAUGAUGCUGCAGUGGCAAUA
pyr-3558	AGAAUCUUGAUGAUGCUGCAG	aly-MIR172c	-59.70	1.22	DangsuA,DangsuB	AGCUACUGUUCGCUGUUGGAGCAUCAUCAAGAUUCACAAAUCAUCAAGUAUUCGUGUAAAUGAACCCAUUUAUAAUUAUAUUGUUGAUGUAUGUAUGAGAAUCUUGAUGAUGCUGCAGCUGCAAUCAGUGGCU
pyr-3558	AGAAUCUUGAUGAUGCUGCAG	cme-MIR172e	-34.80	0.97	DangsuA,DangsuB	GCUAUUGCUGCAUCUUCAAGAUUCACAAGUUUUUUUUUUCUUGUUUGCCCUAAACCCCCUUGAGAAUCUUGAUGAUGCUGCAGUGGCAAUUA
pyr-1139	UAAUCUGCAUCCUGAGGUUUG	ptc-MIR2111b	-49.10	1.09	DangsuA,DangsuB	AUAUUGGGUCAGGAUUGGGUAAUCUGCAUCCUGAGGUUUGGAUCACCACAUGUUUUGAUCUAGUCCUUGGGUUGCAGAUUACCUCUUCCUCACUGACAAUGU
pyr-1139	UAAUCUGCAUCCUGAGGUUUG	ptc-MIR2111a	-48.40	0.99	DangsuA,DangsuB	CUUGAUAUUGGGUCAGGACUUGGUAAUCUGCAUCCUGAGGUUUGGAUCAUCAUGUAGUUUGAUCUAGUCCUUGGGUUGCAGAUUACCUCUUCCUCACUGACAAUGCAGAG
pyr-4415	UGAUUGAGCCGCGCCAAUAU	sbi-MIR171j	-45.80	0.97	DangsuA,DangsuB	GCGAGCGAUAUUGGUGAGGUUCAAUCAGAUCAUCAGAUGAUGUAUUUUAAAUUUACAUGCAUGAAGGUGAAUCCCCAGGGACUGAUUGAGCCGCGCCAAUAUCACUUC
pyr-4415	UGAUUGAGCCGCGCCAAUAU	ccl-MIR171	-120.70	0.94	DangsuA,DangsuB	GAUCUCUUGGGGGUUAAAAUGAAGAUUGUGGUGACCAUUUUGGAGGAUGGAUGGGUACUCACGGGAUAUUGGUGCGGUUCAAUAAGAAAACGGUGCUCAAUACUUUUUGAGCUCCGCUUUUUGAUUGAGCCGCGCCAAUAUCACGUGCCACUCGCUCUCUAAUUGCUUUCUUUUAAGCACAGGGGAGCGCGUAAUUAUGUUGAGGUCAGGUAAGUAGGGGUUUAAAUUAAAAUUCUAGCUUAUUGCUUCUGUUUAAAUUUUACUGUUCAAUUGGCUCCAUUUAGAUGCAUCAUUGUUUUUAUGUUAUGACCCUUUCGAAUU
pyr-4415	UGAUUGAGCCGCGCCAAUAU	csi-MIR171a	-55.50	1.23	DangsuA,DangsuB	UACUCACGGGAUAUUGGUGCGGUUCAAUAAGAAAACGGUGCUCAAUACUUUUUGAGCUCCGCUUUUUGAUUGAGCCGCGCCAAUAUCACGUGCCACU
pyr-4415	UGAUUGAGCCGCGCCAAUAU	vvi-MIR171e	-44.50	0.93	DangsuA,DangsuB	GGAAAGUAAGCGAUGUUGGUGAGGUUCAAUCCGAAGACGGAUUUACGAAGAGCCGUAAAGAACGAUCUCUGAUUGAGCCGCGCCAAUAUCACUUUCUGCUAAG
pyr-4415	UGAUUGAGCCGCGCCAAUAU	sly-MIR171c	-57.20	1.24	DangsuA,DangsuB	CAAAUGGAUGAAUACACGAGAUAUUGGUGCGGUUCAAUGAGAAAGCAGUACUUAAGAACAUUUUUGAGUCUACUUUUUGAUUGAGCCGCGCCAAUAUCACGUGUAGCUAAAUCUUUAGUUG
pyr-4415	UGAUUGAGCCGCGCCAAUAU	cme-MIR171a	-43.30	1.17	DangsuA,DangsuB	AAGCGAUAUUGGUGAGGUUCAAUCUGAAGAUGGAUUUUACAACGAUUGUGAAGUACGAUCUCUGAUUGAGCCGCGCCAAUAUCACUUUUGUA
pyr-4415	UGAUUGAGCCGCGCCAAUAU	cme-MIR171g	-37.10	0.86	DangsuA,DangsuB	AAGCGAUGUUGGGGCAGUUCAAUCUCAAGGCCGAGUUUUGUUUUCUUCAAUUCCUCUCUAAAAUUCUGUCUCUUUGAUUGAGCCGCGCCAAUAUCACUUAACUUU
pyr-905	UGCCUGGCUCCCUGUAUGCCAUU	csi-MIR160	-59.10	1.06	DangsuA,DangsuB	AUUAUACCUAUGUCUAUAUAUUUAUAAUUAUGUGCCUGGCUCCCUGUAUGCCAUUUGCAGAGUCAAUCGAAACAUCGAUGGCCUCCGUGGAUGGCGUAUGAGGAGCCAUGCAUAUUCCAUGUAUAAUAUAUACCCAUAGAUAU
pyr-905	UGCCUGGCUCCCUGUAUGCCAUU	tcc-MIR160b	-59.00	0.97	DangsuA,DangsuB	UGUUAAAUGCACAUUUUGUAUGCCUGGCUCCCUGUAUGCCAUUUGCAAAGCCCAUCAAGAGUCCGGUGGCCUUCGUGGAUGGCAUGCGAGGAGCCAUGCAUGCAUUCUGCUGUCUUAACG
pyr-905	UGCCUGGCUCCCUGUAUGCCAUU	ptc-MIR160b	-49.10	0.94	DangsuA,DangsuB	AUAUUAUAUGUGCCUGGCUCCCUGUAUGCCAUUUGCAGAGCCCAACGGAUCCUCGAUGGCCUCCGUGGAUGGCGUAUGAGGAGCCAUGCAUAUUCGCA
pyr-905	UGCCUGGCUCCCUGUAUGCCAUU	ptc-MIR160c	-49.60	0.97	DangsuA,DangsuB	AUAUUAUAUGUGCCUGGCUCCCUGUAUGCCAUUUGCAGAGCCCACCGGUUCUUCGAUGGCCUCCGUGGAUGGCGUAUGAGGAGCCAUGCAUAUUCACA
pyr-905	UGCCUGGCUCCCUGUAUGCCAUU	mes-MIR160h	-48.00	0.98	DangsuA,DangsuB	AUGUGCCUGGCUCCCUGUAUGCCAUUUGCAGAGCCCACCGGAGAAUCGAUGGCCUCCGUGGAUGGCGUAUGAGGAGCCAUGCAUAU
pyr-905	UGCCUGGCUCCCUGUAUGCCAUU	sly-MIR160a	-60.50	1.03	DangsuA,DangsuB	CAAGUCGUGUACACGUAUAUGCCUGGCUCCCUGUAUGCCAUUUGCAAAGCUCACCGUAAUAUAUCGAUGGGCCUUGUUGAAUGGCGUAUGAGGAGCCAAGCAUAUUCCGAUAUCGUGUAUAUGAUGUUG
pyr-905	UGCCUGGCUCCCUGUAUGCCAUU	ppe-MIR160b	-65.60	0.96	DangsuA,DangsuB	UGAACAUACGCAUAGAUAUACAAAGUAUAUAUGUGCCUGGCUCCCUGUAUGCCAUUUGCAGAGUCCCACCGAACAUCGAUGGCCUCCGUGGAUGGCGUAUGAGGAGCCAUGCAUAUAAACCCAUGUGUUUCCUGUGUGUGUUUCA
pyr-905	UGCCUGGCUCCCUGUAUGCCAUU	ghr-MIR160	-48.30	0.93	DangsuA,DangsuB	CAUCCAUGUAUGUAUGUGCCUGGCUCCCUGUAUGCCAUUUGCAGAGCCCAUUGAACUUCGAUAGCCUCCGUGAAUGGCGUAUGAGGAGCCAUGCAUGUAUUCUAUGUAUU
pyr-905	UGCCUGGCUCCCUGUAUGCCAUU	rco-MIR160a	-54.10	1.10	DangsuA,DangsuB	UUGUGUGCCUGGCUCCCUGUAUGCCAUUUGUGAAGUUCAUCAGAAGCUUGGUGGUCUCCGCAGAUGGCAUGCAAGGAGCCAUGCAUGCUGCU
pyr-905	UGCCUGGCUCCCUGUAUGCCAUU	cme-MIR160a	-55.40	1.11	DangsuA,DangsuB	GUGUGUAUGUGCCUGGCUCCCUGUAUGCCAUUUGUAGAGCUCAUCAGAAUCCGAUGGGCCUCCGCAGAUGGCGUAUGAGGAGCCAUGCAUAUAUCUUAA
pyr-905	UGCCUGGCUCCCUGUAUGCCAUU	cme-MIR160b	-44.80	0.81	DangsuA,DangsuB	CUUUCAAUAUGCCUGGCUCCCUGUAUGCCAUUUGUAGAGCGCUCACCGUCAUUCCCGAUGGCCUCCGCGCAUGGCGUAUGAGGAGCCAAGCAUAUCCAUAUC
pyr-905	UGCCUGGCUCCCUGUAUGCCAUU	cme-MIR160c	-47.60	1.03	DangsuA,DangsuB	UCAUCGUAAUGCCUGGCUCCCUGUAUGCCAUUUGCAAAGCCCAUCAUCUAAAAAUAGGUGGCCUUCUCGAAUGGCAUGCAAGGAGCCAUGCAUGUAUAAAUU
pyr-905	UGCCUGGCUCCCUGUAUGCCAUU	cpa-MIR160f	-45.00	0.92	DangsuA,DangsuB	UGCCUGGCUCCCUGUAUGCCAUUUGCAGAGCCCACCGAGCAUCGCUGGCCUCCGUGGAUGGCGUAUGAGGAGCCAUGCAUA
pyr-905	UGCCUGGCUCCCUGUAUGCCAUU	nta-MIR160b	-48.30	0.88	DangsuA,DangsuB	GAUCUGCAUAUGCCUGGCUCCCUGUAUGCCAUUUGCAGAGCUCAUCGGAAUACCGUUGGGUCCCCGUGAAUGGCGUAUGAGGAGCCAAGCAUAUCCCCGAUAU
pyr-905	UGCCUGGCUCCCUGUAUGCCAUU	nta-MIR160a	-48.90	0.92	DangsuA,DangsuB	AAUAUGCAUAUGCCUGGCUCCCUGUAUGCCAUUUGCAGAGCUCAUCGGAAUACCGUUGGGUCCCCGUGAAUGGCGUAUGAGGAGCCAAGCAUAUCCCGGAUAU
pyr-905	UGCCUGGCUCCCUGUAUGCCAUU	stu-MIR160a	-43.20	1.03	DangsuA,DangsuB	UGCCUGGCUCCCUGUAUGCCAUUUGCAAAGCUCACCGUAAUAUAUCGAUGGGCCUUGUUGAAUGGCGUAUGAGGAGCCAAGCAUA
pyr-905	UGCCUGGCUCCCUGUAUGCCAUU	cpa-MIR160c	-45.00	0.92	DangsuA,DangsuB	UGCCUGGCUCCCUGUAUGCCAUUUGCAGAGCCCACCGAGCAUCGCUGGCCUCCGUGGAUGGCGUAUGAGGAGCCAUGCAUA
pyr-905	UGCCUGGCUCCCUGUAUGCCAUU	cca-MIR160b	-47.80	1.00	DangsuA,DangsuB	AGCAUAUGCCUGGCUCCCUGUAUGCCAUUUGCAAAGCGUAUCGACAUAUCGAUGGUCUAUGUGGAUGGCGUAUGCGGAGCCAAGCAUGUUCCG
pyr-905	UGCCUGGCUCCCUGUAUGCCAUU	mtr-MIR160a	-58.50	1.24	DangsuA,DangsuB	AGAUAUAUAUACUAAUUGCGUGCCUGGCUCCCUGUAUGCCAUUUGUAGAGUUCAUCAAGAUGUUGAUGACUUUAAUGAAUGGCGUGCGAGGAGCCAUGCAUGUUGUGUAUAUUUUCUAU
pyr-905	UGCCUGGCUCCCUGUAUGCCAUU	mtr-MIR160d	-50.30	1.12	DangsuA,DangsuB	UAGUGUGCCUGGCUCCCUGUAUGCCAUUUGUAGAGUCCAUCACGACAGUGAUGAACUUAGUGAAUGGCGUACUCGGAGUCAUGCAUGCUGU
pyr-905	UGCCUGGCUCCCUGUAUGCCAUU	vun-MIR160	-50.20	0.93	DangsuA,DangsuB	UGUUAACAUGCUUGGCGUGCCUGGCUCCCUGUAUGCCAUUUGCAGAGCCCAUCAGAACAGUGAUGGCUUUAACUAAUGGCGUGCGAGGAGUCAUGCAUGUUGUUAGUUAUUAGUUAA
pyr-905	UGCCUGGCUCCCUGUAUGCCAUU	lus-MIR160b	-64.20	0.87	DangsuA,DangsuB	GGUGGUGAGUUAGUGUGUAAUGUGUGUGCGUGCCUGGCUCCCUGUAUGCCAUUUGCAAGAGCUCAUCAACACAGUUUUGAUGGGGCUUGGUGGAUGGCGUACUGAGUAGCCAUGCAUGCCUAACUAUCAUUGCUCCAAAUCUAACUUCUCCAUU
pyr-905	UGCCUGGCUCCCUGUAUGCCAUU	lus-MIR160e	-62.40	0.85	DangsuA,DangsuB	GGAUGGAUGAUGAACUGUGCAUGUGCCUGGCUCCCUGUAUGCCAUUCGCAGAGCUCCAACGGAUUCAUCCAUGGCCUCCGUGGAUGGCGUAUGAGGAGCCAUGCAUAUAUCUACCUACCUUUUCAUCUCAUCAUCCCUUUCC
pyr-905	UGCCUGGCUCCCUGUAUGCCAUU	lus-MIR160d	-100.00	0.83	DangsuA,DangsuB	GCUAGCUAAGGUGGCGGUGGUGGGUGGUGGUGGUGGUGUUGAGUUGAGUGUGUAAUGGCUGUGUGUGCGUGCCUGGCUCCCUGUAUGCCAUUUGCAAGAGCUCAUCAACACAGUUUUGAUGGGGCUUGGUGGAUGGCGUACUGAGUAGCCAUGCAUGCUUAUAACUACCAUUAACUCCUCCAUUCAUUUAUCCCCAACCAACCAUUCCCUUCCUUCCUACUGGCACCAAUGCUGC
pyr-905	UGCCUGGCUCCCUGUAUGCCAUU	lus-MIR160f	-66.00	0.90	DangsuA,DangsuB	AUGGAGAUGAUGGUGAAGUGUGCAUGUGCCUGGCUCCCUGUAUGCCAUUCGCAGAGCUCCACCGGAUUCAUCCAUGGCCUCCGUGGAUGGCGUAUGAGGAGCCAUGCAUAUAUCUAUACCUGUUUCAUCUCAUCCCUUUCCAU
pyr-905	UGCCUGGCUCCCUGUAUGCCAUU	vvi-MIR160d	-49.50	0.88	DangsuA,DangsuB	CAUACUUACAUGCCUGGCUCCCUGUAUGCCAUUUGCAAAGUCCACCCGAGGAUUGGUAGCCUUCGCGGAUGGCGUGCGAGGAGCCAUGCAUGCAUCUUGCUU
pyr-905	UGCCUGGCUCCCUGUAUGCCAUU	gma-MIR160d	-42.60	0.97	DangsuA,DangsuB	UGCCUGGCUCCCUGUAUGCCAUUUGUAGACCCCAUUACAAAGGUGAUGGCCUUAGCAAAUGGCGUAUGAGGAGUCAUGCAUGCUGUGUUUU
pyr-905	UGCCUGGCUCCCUGUAUGCCAUU	gma-MIR160e	-50.00	0.98	DangsuA,DangsuB	UACUUGGCGUGCCUGGCUCCCUGUAUGCCAUUUGCAGAGCCCAUCAGGACAGUGAUGGCCUUAACGAAUGGCGUGCGAGGAGCCAUGCAU
pyr-905	UGCCUGGCUCCCUGUAUGCCAUU	gma-MIR160f	-51.10	1.09	DangsuA,DangsuB	UACAUUGUGUGCCUGGCUCCCUGUAUGCCAUUUGUAGACCCCAUCACAAUGGUGAUGGCCUUAUCAAAUGGCGUAUGAGGAGUCAUGCAUGCUGUGU
pyr-905	UGCCUGGCUCCCUGUAUGCCAUU	gma-MIR160a	-50.00	0.96	DangsuA,DangsuB	CAUGCAUACAUAUGUGUAUGUGCCUGGCUCCCUGUAUGCCAUUUGUAGAGCUCAUCGAAGCAUCAAUGACCUUUGUGGAUGGCGUAUGAGGAGCCAAGCAUAUUUCAUAUACAUACAUG
pyr-905	UGCCUGGCUCCCUGUAUGCCAUU	gma-MIR160b	-48.40	1.21	DangsuA,DangsuB	AUGUGUAUGUGCCUGGCUCCCUGUAUGCCAUUUGCAUAGUUCAUUGAGCAUCAAUGAUCUUUGUGAAUGGCGUAUGAGGAGCCAAGCAUA
pyr-905	UGCCUGGCUCCCUGUAUGCCAUU	gma-MIR160c	-48.60	0.95	DangsuA,DangsuB	UGCCUGGCUCCCUGUAUGCCAUUUGCAGAGCCCAUCAGGACAGUGAUGGCCUUAACGAAUGGCGUGCGAGGAGCCAUGCAUGUUGUGCGUU
pyr-905	UGCCUGGCUCCCUGUAUGCCAUU	mdm-MIR160e	-47.90	1.02	DangsuA,DangsuB	UAUGUGCCUGGCUCCCUGUAUGCCAUUUGCAGAGUUCCACCGAACAUCGAUGGCCUCCGUGGAUGGCGUAUGAGGAGCCAUGCAUAUA
pyr-905	UGCCUGGCUCCCUGUAUGCCAUU	aqc-MIR160b	-46.80	1.14	DangsuA,DangsuB	UGCCUGGCUCCCUGUAUGCCAUUUGCUUAGUCCAUUUAGUAUUAGAUGGCCUUUGUGGAUGGCGUGCGAGGAGCCAUGCAUA
pyr-905	UGCCUGGCUCCCUGUAUGCCAUU	mes-MIR160d	-48.00	1.00	DangsuA,DangsuB	AUAUGCCUGGCUCCCUGUAUGCCAUUUGCAGAGCCCACCGGAGAAUCGAUGGCCUCCGUGGAUGGCGUAUGAGGAGCCAUGCAUAU
pyr-905	UGCCUGGCUCCCUGUAUGCCAUU	vvi-MIR160e	-48.70	0.87	DangsuA,DangsuB	UAAGCAUAUAUGCCUGGCUCCCUGUAUGCCAUUUGCAGAGCCCACCGGCACAUCGAUGGCCUUCGUGGAUGGCGUAUGAGGAGCCAUGCAUAUGCCCCAUCU
pyr-905	UGCCUGGCUCCCUGUAUGCCAUU	mdm-MIR160c	-51.70	1.08	DangsuA,DangsuB	UAUGUGCCUGGCUCCCUGUAUGCCAUUUGCAGAGUCCCACCGAACAGCGAUGGCCUCUGUGGAUGGCGUAUGAGGAGCCAAGCAUAUA
pyr-1957	UGCUCUGAUACCAAUUGUUGG	bdi-MIR845	-47.80	1.26	DangsuA,DangsuB	UGAUUUUCUUGCUCUGAUACCAAUUGUUGGUAUCAGUAACCUCUGAUACCUAGAUCGUCUGCACCAACAAUUCGUAUCAGAGCGAGAGAAUCAAU
pyr-1959	AGGUCAUCUAGCAGCUUCAAU	sly-MIR167b	-74.90	0.92	DangsuA,DangsuB	UCUCACUUCUGUAUGUUGGUUUUUUGAGAGGUUAAAGCUGCCAGCAUGAUCUGGUAAGAACAAAAUCCUAUUAUAUUUCAUCUAUAUUUUCUUAUAAAAAGAAGAAAUGAAUUUAAAUUUGAAUUUUUUGUAAAAAAAAAAUGUUGAGGUUUUUAAUUUCCUUCUUUUGGAUUUGAAAAAAAGAAAAUUAAAUUUUUGUAAGGAUUUUAUUUCUUUGAAGAAAAUAUAGAUAGAUAGCUUUGGUUCCAUCAGGUCAUCUAGCAGCUUCAAUCACUCACCAACAAUACACACAAAGGA
pyr-1959	AGGUCAUCUAGCAGCUUCAAU	nta-MIR167c	-70.70	0.87	DangsuA,DangsuB	UUUGAGAGGUUGAAGCUGCCAGCAUGAUCUGGUACGAACAAAGUCCAUUUCUUGCUAUAUAUAUAUUUUCUUGCAAAGAAUAAUCUUGAGGUGUUUUGGGUUUGAAUUUAGCUAAGUGAUUUGGAAAAGAAAUUGGAAUUUUGCAAAGUUUUUAUUGAAAGAGAAUAUAGGUAGCUUUCAUGGGUUUGGUUCCAUCAGGUCAUCUAGCAGCUUCAAUCACUCACCAC
pyr-1959	AGGUCAUCUAGCAGCUUCAAU	nta-MIR167b	-69.20	0.85	DangsuA,DangsuB	UUUGAGAGGUUGAAGCUGCCAGCAUGAUCUGGUACGAACAAAGUCCAUUUCUUUGCUAUAUAUAUAUUUUCUUGCAAAAGAAUAAUCUUGAGGUGUUUUGGGUUUUGAAUUUAGCUAAGUGAUUUGGAAAAGAAAUUGGAAUUUUGCAAAGUUUUUAUUGAAAGAGAAUAUAGGUAGCUUUCAUGGGUUUGGUUCCAUCAGGUCAUCUAGCAGCUUCAAUCACUCACCAC
pyr-1959	AGGUCAUCUAGCAGCUUCAAU	nta-MIR167a	-78.90	0.91	DangsuA,DangsuB	UUUGAGAGGUUGAAGCUGCCAGCAUGAUCUGGUACGAACAAAGUCCAUUUCUUUCUAUAUAUAAAUAUUUUCUUGCAAAGAAGAAAAGAAAAGAAAGUCCAUUUUUUCUUAAAAUUUUGAGGUCUUUUAAUUUCCUGUUUUGGGUUUGAAAUUGAAGUGAUAUUUUCGAAAAGAAAAUGGAAUUUUUCGAAGUUUUCUUGAAAGAAAAUAUAGGUAUCGUCUUUCAUAGGUUUGGUUCCAUCAGGUCAUCUAGCAGCUUCAAUCACUCACCAA
pyr-4523	GGAAUGUUGUCUGGCUCGAGG	osa-MIR166d	-54.10	0.89	DangsuA,DangsuB	GAAGCUUUUUCACUUUGAGGGGAAUGUUGUCUGGCUCGAGGUGCAUGGAGAAACCUCUGAUCGAUCAGGUUUGAUCUGUAGAGACUGAUCUCGGACCAGGCUUCAUUCCCCUCAAGUAAAGCUCC
pyr-4523	GGAAUGUUGUCUGGCUCGAGG	pde-MIR166b	-43.60	1.01	DangsuA,DangsuB	GGGGAAUGUUGUCUGGCUCGAGGUCACUCAGAUUUGAUGACGAUGAUUCUUUGAGCUGAGUGACGUCGGACCAGGCUUCAUUCC
pyr-4523	GGAAUGUUGUCUGGCUCGAGG	ptc-MIR166j	-46.50	0.82	DangsuA,DangsuB	UCUUUUUUGAGGGGAAUGUUGUCUGGCUCGAGGACUUUUUGUUCAUCAAUCUAAUCGAACUUUCUACCUGUAGAUCUAGUAUCUUAUUUAAGAUUGAUCACGUAUUAGGGUUGUCGGACCAGGCUUCAUUCCCCCCAAUCAUU
pyr-4523	GGAAUGUUGUCUGGCUCGAGG	aly-MIR166d	-40.20	0.82	DangsuA,DangsuB	GGUUGAGAGGAAUGUUGUCUGGCUCGAGGUCAUGAAGAAGAUCAUUAGAUUGAUUCAUCUUAAAGAAUGAAAACCCUAAAUGAUUCUCGGACCAGGCUUCAUUCCCCCCAACC
pyr-4523	GGAAUGUUGUCUGGCUCGAGG	aly-MIR166c	-45.80	0.85	DangsuA,DangsuB	GGUUGAGAGGAAUGUUGUCUGGCUCGAGGUCAUGAAGGAGAGGAUAUCACUCCAAUUAAUUUGGAAGAACGAAUUAAGAAACCCUAAAUGAUUCUCGGACCAGGCUUCAUUCCCCCUAACC
pyr-4523	GGAAUGUUGUCUGGCUCGAGG	aly-MIR166a	-64.00	0.81	DangsuA,DangsuB	GGGGUUUUCUCUUUUGAGGGGAAUGUUGUCUGGCUCGAGGACUCUGGCUCGCUCUAUUCAUGUUGGAUCUUUUUCGAUCUAAUAAUCGAAUUGAACCUCCAGAUUUCAGAUCUGACUAGGGUUUUAGCGUCGUCGGACCAGGCUUCAUUCCCCCCAAUUGUUGCUCC
pyr-4523	GGAAUGUUGUCUGGCUCGAGG	pvu-MIR166a	-174.50	0.66	DangsuA,DangsuB	AUCAGUUUCUACUUUCUAAUCAUCAACUUCUUCAAACACAUCAUAUGAAUAUAGCUACCUAGGUGCUGUUUUCUUUUCCAACUUCCUCAUAUCUUGUUCAUUCCUUGCAAAGGUGAGGUUGAGAGGAAUGUUGUCUGGCUCGAGGUCAUGGAGGAGGAGAGUUCUCAGAUAAACUCUUUCACCCAAAGUUUCCAAUGGAAAUUUACCCUCUAACACCAAAAUGAUUCUCGGACCAGGCUUCAUUCCCCCCACCCAACUUUUGCUAUUUUCUUUCUCGUAAUCUUCAUAUUUUGCAUGCCCCCAUGCUUGUUUUUGCAGGAUCAGAAUUUUCAACUCACUACCCAUCUUCUUUUGUUUUACCUGUAAAUAUCUUUAUAAAGGCCGGUGAAAAUUAUAGGG…
pyr-4523	GGAAUGUUGUCUGGCUCGAGG	ptc-MIR166a	-55.00	0.98	DangsuA,DangsuB	UUUCUUUUGAGGGGAAUGUUGUCUGGCUCGAGGUCACUAAUGGGAUCUAUGAUUUUAUCUCAAUUGAUUGAUUUUCUUUUAAAUUCUAGUAAAUUGAAUUGAGAGAUAUCAUGAUCAACUUAUAUUUAAUGAUGUCGGACCAGGCUUCAUUCCCCCCAAUUGUU
pyr-4523	GGAAUGUUGUCUGGCUCGAGG	ptc-MIR166c	-56.10	1.00	DangsuA,DangsuB	CUUUUUUUGAGGGGAAUGUUGUCUGGCUCGAGGACUCUUUCUUGAUCAGUCUGAUCAAGUGUUCUAUCUUUAGAUCUAAUAUCUUAGAUCAUGUGUUAGGGUCGUCGGACCAGGCUUCAUUCCCCCCAAUUAUU
pyr-4523	GGAAUGUUGUCUGGCUCGAGG	pde-MIR166a	-41.60	0.82	DangsuA,DangsuB	GGGGAAUGUUGUCUGGCUCGAGGCCAUCCUGAAAAUAGUCCACCCCCGGUUCUUUUGGGGUUUUUUUGGAUGCCGUCGGACCAGGCUUCAUUCC
pyr-4523	GGAAUGUUGUCUGGCUCGAGG	lus-MIR166g	-42.40	0.88	DangsuA,DangsuB	CUUUUGAGGGGAAUGUUGUCUGGCUCGAGGCCACUCUUGCUCGGAUUUAUGAUUCGAUUAGUGACGUCGGACCAGGCUUCAUUCCCCCCAAUUG
pyr-4523	GGAAUGUUGUCUGGCUCGAGG	ptc-MIR166q	-63.90	0.95	DangsuA,DangsuB	UUAGGUUGAGAGGAAUGUUGUCUGGCUCGAGGUCAUUGAGGCCAUGAUUAUACAGACAUGGCAUUACCUGAUGACAGCCGAGAAAAUUCAAAGUCUGUGUGUAUCUUGUACCUCGAUGAUUCUCGGACCAGGCUUCAUUCCUUCCAACAAA
pyr-4523	GGAAUGUUGUCUGGCUCGAGG	lus-MIR166i	-43.10	0.76	DangsuA,DangsuB	UUGAGGGGAAUGUUGUCUGGCUCGAGGCCACUAUAGUAUUCAGAUCUCUUCUCUUCUUCUUGGCCGGGUUCUUUUAUCCGAUUAGUGACGUCGGACCAGGCUUCAUUCCCCCCAA
pyr-4523	GGAAUGUUGUCUGGCUCGAGG	mdm-MIR166g	-73.10	1.06	DangsuA,DangsuB	UUGAGGGGAAUGUUGUCUGGCUCGAGGACACUUUCCUUGAUCUAUAAUCUCUAGAUCAACCGUUAUAUACCUAUACAUAUAUCUAUAUAUGUGUUUGUAUAUGUUGUGUGUAUCAUCUGCAUACAUAGAUGAUCAGGUUAAGUAGUGUCGUCGGACCAGGCUUCAUUCCCCCCAA
pyr-4523	GGAAUGUUGUCUGGCUCGAGG	sly-MIR166b	-73.10	0.89	DangsuA,DangsuB	UCCCAUAGAUCAUAUGGAGGAAGUUCUCUCAGUUGAGGGGAAUGUUGUCUGGCUCGAGGUCACCAAUUAGAUCCAUAAUCCCUAUAUAUACCAUGCUUUUCAAAAAAAAGAUUUAUAAUAUGAAAAGGGGUUAUGAAUCAUGUGUUAGUGUUGUCGGACCAGGCUUCAUUCCCCCCAAUUGUUACUCCUCUAGCUAGGGGA
pyr-4523	GGAAUGUUGUCUGGCUCGAGG	rco-MIR166e	-53.10	0.86	DangsuA,DangsuB	UGAGGGGAAUGUUGUCUGGCUCGAGGACUCUCUUUUGAUCCCUUUCAAUUUUCUCCAUAGAUCCAAUACGGAUAUUGGGAGUGGGUAGAUCAUUUGACAGUGUCGUCGGACCAGGCUUCAUUCCCCCCAAU
pyr-4523	GGAAUGUUGUCUGGCUCGAGG	ctr-MIR166	-116.20	0.81	DangsuA,DangsuB	GGUUUGUCUGAAGGAUCUAGGGUUAAUUGGGAAGCUUUUUCUUUUGAGGGGAAUGUUGUCUGGCUCGAGGCCACUAACUAGAUCUUUGAUUUAAUCUCAGUUGAUCAUAUAUUUGUUUCAUUUUUCUUCCAUAAAAUUUAAUUAUAUUGAGAUACCCAUCAUUGAUCUUAAGAUAAUUAAGUUAGUGACGUCGGACCAGGCUUCAUUCCCCCCAAUAAUUGCUUCUAUCUGCUAUGAUAUCAUCUUCAUUUCUUGGAGGUGCUGUGAUCAGUUCUCAAACUUUAGUUGAUUUUUUCACAAUUUUUCUUUUUGUUUAAUUUAUUGAUCUUGUGUUGUGUAUAUUUGUAUGGUCAACGGAGAGAUCUUGGUCAUUGGCCAUGAGCAGAUUGGUGUAAUGAU…
pyr-4523	GGAAUGUUGUCUGGCUCGAGG	cme-MIR166b	-42.50	1.01	DangsuA,DangsuB	UUGAGGGGAAUGUUGUCUGGCUCGAGGACACUUUUAUUCGAUCUUUUGAUUUUUGUGUUUAUAUUUAGUGUCGUCGGACCAGGCUUCAUUCCCCCCAAUUAAU
pyr-4523	GGAAUGUUGUCUGGCUCGAGG	cme-MIR166c	-56.70	0.96	DangsuA,DangsuB	UUGAGGGGAAUGUUGUCUGGCUCGAGGUCACUUUUUUCUCUAAAAUUAAUUCCAUCUUUCGUUUUAAUUUCAAACAAAUUACUACGAUCGACGAAUUGAUUCAUUCGAAACGAAGUGUCGUCGGACCAGGCUUCAUUCCCCCCACAAAUU
pyr-4523	GGAAUGUUGUCUGGCUCGAGG	atr-MIR166c	-62.20	0.93	DangsuA,DangsuB	UCAGAUGAUGAUGAUAUAUGCAUAUGAGUUGUGGGGAAUGUUGUCUGGCUCGAGGUACAUCUGGGGUUAUCUUGAGUCACAUUCCAGAUGAUCUCGGACCAGGCUUCAUUCCCCUCAACCAAGCCGAGCUCAUCCUUCUUAUGA
pyr-4523	GGAAUGUUGUCUGGCUCGAGG	cme-MIR166f	-44.20	0.92	DangsuA,DangsuB	UUGAGGGGAAUGUUGUCUGGCUCGAGGACACUUGUUCUUUUUCAUCCACUUCUUGAAUUCAUUAGUGUCGUCGGACCAGGCUUCAUUCCCCCCAAUUGCC
pyr-4523	GGAAUGUUGUCUGGCUCGAGG	ppe-MIR166d	-69.30	1.05	DangsuA,DangsuB	GAAGCUUUAGCUUUUGAGGGGAAUGUUGUCUGGCUCGAGGACACUUUUCCUUGAUCUGUAUUUCUUAUAGAUCAACCUGUAUAUUUAUAUCUAGGUAUACAUAUAUAUGGCUUUUGGUGAAUUAGUGUCGUCGGACCAGGCUUCAUUCCCCCCAAUUUAUGGCUUC
pyr-4523	GGAAUGUUGUCUGGCUCGAGG	ppe-MIR166e	-63.90	0.97	DangsuA,DangsuB	GUUUUUGAGGGGAAUGUUGUCUGGCUCGAGGCCCCUAACUAGAUCCAUGAUCUUCAUCUCAAUUGAUGUCAAUUUUAAUCAACAAUAUAGACUCAGUUGAGACAGAUCAUUUGGUUCUACAUUUAGUGACGUCGGACCAGGCUUCAUUCCCCCCAAUUAU
pyr-4523	GGAAUGUUGUCUGGCUCGAGG	stu-MIR166a	-39.90	0.97	DangsuA,DangsuB	GGAAUGUUGUCUGGCUCGAGGAAUCAAAUUCUUUAUUACUCAUAGAUCUGUAUAUUGUUUAUAGAUCUAUAAUGUUUUUGACGUCGUCGGACCAGGCUUCAUUCCCC
pyr-4523	GGAAUGUUGUCUGGCUCGAGG	nta-MIR166d	-72.40	0.93	DangsuA,DangsuB	UGUUUUGAGGGGAAUGUUGUCUGGCUCGAGGUCACUAACUUGAUCCAAUUUGAACUCUCUUUCCCUUUUUGAGAUGUCAUCUCCAUUAAUUAGCAAAUAGAUCAAUAGUUCUUGAUUGACAUUCUCUAUUAAGAGGGAUCAUGGAUCAUGGUUUAGUGUCGUCGGACCAGGCUUCAUUCCCCCCAAAUCUUG
pyr-4523	GGAAUGUUGUCUGGCUCGAGG	nta-MIR166e	-68.50	0.99	DangsuA,DangsuB	UCAGUUGAGGGGAAUGUUGUCUGGCUCGAGGUCACCAACUAGAUCCAUAAGCUCCACUUUAUGCUUAUUUGAACAUAAAGAUUAGUUUUGUAAUAUAAAGAUUCGUUGAUUAUAUGAAAAGGGGUUAUGGAUCAUGAGUUAGUGUUGUCGGACCAGGCUUCAUUCCCCCCAAUUGUUA
pyr-4523	GGAAUGUUGUCUGGCUCGAGG	nta-MIR166a	-65.70	0.90	DangsuA,DangsuB	UGUUUUGAGGGGAAUGUUGUCUGGCUCGAGGUCACUAACUUGAUCCAAUUAUUUGAACUCUCUUUCCCUUUUUGAGAUGUCAUCUCCAUUAAUUAACAAAUAGAUCAAUAGUUCUUGAUUGGCAUUAGGGAUCAUGGAUCAUGGUUUAGUGUCGUCGGACCAGGCUUCAUUCCCCCCAAAAUUU
pyr-4523	GGAAUGUUGUCUGGCUCGAGG	rco-MIR166b	-57.80	1.18	DangsuA,DangsuB	UGAGGGGAAUGUUGUCUGGCUCGAGGUCACUAAUUAGAUCUAUGAUUUUAUUUUUGCUUUUAAGAUAGAUCGUUGAUCGUAUUGUUAGUGACGUCGGACCAGGCUUCAUUCCCCCCAAU
pyr-4523	GGAAUGUUGUCUGGCUCGAGG	mes-MIR166f	-55.00	1.00	DangsuA,DangsuB	UUGAGGGGAAUGUUGUCUGGCUCGAGGCCACUAACUAGAUCUAUGAUUUUAUCUCUGAAAUCAUUAAUUUAAUUCAUUUUCGUUGUUGAGAUAUGAUUUAUCAUGAGUUAGUGACGUCGGACCAGGCUUCAUUCCCCCCAA
pyr-4523	GGAAUGUUGUCUGGCUCGAGG	mes-MIR166g	-57.40	1.08	DangsuA,DangsuB	UUGAGGGGAAUGUUGUCUGGCUCGAGGCCACUAACUAGAUCUGUAAUUUUUAUCUCUGAAUUUGUAUUGAGAUAUGAUUGAUGAUCAUGAGUUAGUGACGUCGGACCAGGCUUCAUUCCCCCCAA
pyr-4523	GGAAUGUUGUCUGGCUCGAGG	mes-MIR166d	-42.20	0.83	DangsuA,DangsuB	UUGAGGGGAAUGUUGUCUGGCUCGAGGACUCUCUUUUGAUGCUUUUACAUACAGAUCUAAGCAUAUUGAUCAACUGCUAGUGUCGUCGGACCAGGCUUCAUUCCCCCCAA
pyr-4523	GGAAUGUUGUCUGGCUCGAGG	vvi-MIR166e	-69.90	0.92	DangsuA,DangsuB	GUGUUUUGAGGGGAAUGUUGUCUGGCUCGAGGACACCAACUAGAUCUAUGAUCUGCGUGUAAUUGUGAAUGGGUGAUCGUCUCUCAGUUUUGAAGGAGAGAUUUUGAGUGAUCUUUGAUCAUGGGUUGGUGUCGUCGGACCAGGCUUCAUUCCCCCCAAUUUAUUG
pyr-4523	GGAAUGUUGUCUGGCUCGAGG	vvi-MIR166c	-50.50	0.78	DangsuA,DangsuB	CUAUUUUGAGGGGAAUGUUGUCUGGCUCGAGGACACUUACCUUAACUUUGAUCCGUUUCUCUAGAUCCAUAUCACCUAUAUAUAUGUAUUAUUGUAUUUUUAUUUGUACUGAGCAUGUGUUGGUGUCGUCGGACCAGGCUUCAUUCCCCCCAAUUAUCGC
pyr-4523	GGAAUGUUGUCUGGCUCGAGG	sbi-MIR166d	-47.50	1.03	DangsuA,DangsuB	GGGGAAUGUUGUCUGGCUCGAGGUGCAGGAACAUGCAGAUCUCAUCGGUCUAGAUUGUUGUUGAUCUCGGACCAGGCUUCAUUCCCC
pyr-4523	GGAAUGUUGUCUGGCUCGAGG	mtr-MIR166g	-44.60	0.91	DangsuA,DangsuB	UUUGAGGGGAAUGUUGUCUGGCUCGAGGACGCUUUCUUCUCGAUCUAAUGCAAAUUUGUGGUCAUGGAUUGUAAAGUAUUCUCGGACCAGGCUUCAUUCCCCCCAAU
pyr-4523	GGAAUGUUGUCUGGCUCGAGG	ptc-MIR166k	-46.50	0.82	DangsuA,DangsuB	UCUUUUUUGAGGGGAAUGUUGUCUGGCUCGAGGACUUUUUGUUCAUCAAUCUAAUCGAACUUUCUACCUGUAGAUCUAGUAUCUUAUUUAAGAUUGAUCACGUAUUAGGGUUGUCGGACCAGGCUUCAUUCCCCCCAAUCAUU
pyr-4523	GGAAUGUUGUCUGGCUCGAGG	zma-MIR166c	-45.30	0.91	DangsuA,DangsuB	GGGGAAUGUUGUCUGGCUCGAGGUGCAGAAACACGCAGAUCUCAUCGAGGUCGUCUUGGUUGUUGUUGAUCUCGGACCAGGCUUCAUUCCCC
pyr-4523	GGAAUGUUGUCUGGCUCGAGG	zma-MIR166e	-41.20	0.90	DangsuA,DangsuB	GGGGAAUGUUGUCUGGCUCGAGGUGCAGAAACAUACAGAUCUCAUCGGUCUAGGUUCUUGUCGAUCUCGGACCAGGCUUCAUUCCCC
pyr-4523	GGAAUGUUGUCUGGCUCGAGG	csi-MIR166a	-64.60	0.91	DangsuA,DangsuB	GAAGCUUUUUCUUUUGAGGGGAAUGUUGUCUGGCUCGAGGCCACUAACUAGAUCUUUGAUUUAAUCUCAGUUGAUCAUAUAUUUGUUUCAUUUUUCUUCCAUAAAAUUUAAUUAUAUUGAGAUACCCAUCAUUGAUCUUAAGAUAAUUAAGUUAGUGACGUCGGACCAGGCUUCAUUCCCCCCAAUAAUUGCUUCUAUCUGC
pyr-4523	GGAAUGUUGUCUGGCUCGAGG	gma-MIR166q	-51.90	0.93	DangsuA,DangsuB	UGUUAGGUUGAGAGGAAUGUUGUCUGGCUCGAGGUCAUGAAGAUAUACAUAUGAAAGUGUUAACUUUUCAGUUAAUUUCUAGGAUAAAUUAAUGGAAAUUAAUUUAUACCCUAAAUGAUUCUCGGACCAGGCUUCAUUCCCCCCAGCCAACA
pyr-4523	GGAAUGUUGUCUGGCUCGAGG	csi-MIR166e	-61.50	0.82	DangsuA,DangsuB	GGGGAGCUUUUUGUUUUGAGGGGAAUGUUGUCUGGCUCGAGGACACUACUUGUUGAUCCAUUAAUUUUACGUAUUCUCUCAUAGAUCUAGCAUCUGAAUGGUGGAUAACAAUAUACGGAUUCAGCUUAUUUGGCGUCGUCGGACCAGGCUUCAUUCCCCCCAAUAUAUUGCUUCUAU
pyr-4523	GGAAUGUUGUCUGGCUCGAGG	gma-MIR166u	-44.60	0.70	DangsuA,DangsuB	GAGGUUGAGAGGAAUGUUGUCUGGCUCGAGGUCAUGGAGGAGGAGGAGAGUACUGAGAUGAGUGAAAGUUUCCAAUGGAAAUUUACCCUCUUAACACAAAAAAAAAUUGAUUCUCGGACCAGGCUUCAUUCCCCACACCCA
pyr-4523	GGAAUGUUGUCUGGCUCGAGG	bdi-MIR166e	-72.30	0.96	DangsuA,DangsuB	GGGAUAGCAAAGGGGGAGCUUUUUUACUUUGAGGGGAAUGUUGUCUGGCUCGAGGUGCUGAGAUCGAGAGAACUUGAAAUUCGAUCUCUAGAUUGAUCUCGGACCAGGCUUCAUUCCCCUCAAGUAAAGCUCCCGUGUGGCCUGCGAUUCU
pyr-4523	GGAAUGUUGUCUGGCUCGAGG	gma-MIR166b	-60.60	0.79	DangsuA,DangsuB	GCUUGCAAAGGUGAGGUUGAGAGGAAUGUUGUCUGGCUCGAGGUCAUGGAGGAGGAGGAGGAGUAGAGUACUGAGAUCAGUGAAAGUUUCCAAUGGAAAUUUACCCUCUUACACAAAAAAAUGAUUCUCGGACCAGGCUUCAUUCCCCCCACCCAACUUUUGCUUUU
pyr-4523	GGAAUGUUGUCUGGCUCGAGG	gma-MIR166c	-52.80	0.88	DangsuA,DangsuB	GCUUUGUGUUUUGAGGGGAAUGUUGUCUGGCUCGAGGACCCUUCUUCUUCUUGAUCUUGUGUAGACUGCUAUACCUGUGGUCAAGGAAUGCUUAGUGUUUUCGGACCAGGCUUCAUUCCCCCCAAUUAUA
pyr-4523	GGAAUGUUGUCUGGCUCGAGG	gma-MIR166a	-59.90	0.91	DangsuA,DangsuB	ACGGAAGCUUUGUCUUUUGAGGGGAAUGUUGUCUGGCUCGAGGACCCUUCUUCAUCUUGAUCUUGUGUAGACUACUAUGCUUGUGGUCAAGGAAUACAUAGUGUUGUCGGACCAGGCUUCAUUCCCCCCAAUUAUAUGCUUCCAAA
pyr-4523	GGAAUGUUGUCUGGCUCGAGG	cpa-MIR166a	-43.30	0.79	DangsuA,DangsuB	GGAAUGUUGUCUGGCUCGAGGACAUUUAAUUCUAUGCAUCCAUCCAUCCAUCCAUUUACAUCUCCAGAUCUGGACUACUUGGAUUAAUUUUGAGUUAGUGUCGUCGGACCAGGCUUCAUUCCCC
pyr-4523	GGAAUGUUGUCUGGCUCGAGG	mdm-MIR166a	-64.70	0.91	DangsuA,DangsuB	UUGAGGGGAAUGUUGUCUGGCUCGAGGACUCUUUUCAUAUUGAUCUAUAAUCCCCUAGAUCAACAACCUUCAUAUAUAUCUAUAUGUGUAUGUAUAUGUUGCGUGUAUCAACUGCAUACACAGAGAUGAUCAGGUGAAUUAGUGUCGUCGGACCAGGCUUCAUUCCCCCCAA
pyr-4523	GGAAUGUUGUCUGGCUCGAGG	gma-MIR166n	-46.60	0.70	DangsuA,DangsuB	AGGUUGAGAGGAAUGUUGUCUGGCUCGAGGUCAUGGAGGAAGAGGAGAGUACUGAGAUCAGUGAAAGUUUCCAAUGGAAAUUUACCCUCUUAACACACACACAGAAAAAAUGAUUCUCGGACCAGGCUUCAUUCCCCCCACCC
pyr-4523	GGAAUGUUGUCUGGCUCGAGG	gma-MIR166o	-51.70	0.94	DangsuA,DangsuB	AUGUUGAGAGGAAUGUUGUCUGGCUCGAGGUCAUGAUAUGGAGAUAUAUAUGAAAGUGUUUCAGUUAAAUUCCAGGGUAUAUAAAUUAAUGGAAAUUAAUUUAUACCCUAAAUGAUUCUCGGACCAGGCUUCAUUCCCCCCAGCC
pyr-4523	GGAAUGUUGUCUGGCUCGAGG	gma-MIR166l	-50.30	0.70	DangsuA,DangsuB	UUUCCUUGCAAAGGUGAGGUUGAGAGGAAUGUUGUCUGGCUCGAGGUCAUGGAGGAGGAGAGUACUCAGAUGAGUGAAAGUUUCCAAUGGAAAUUUACCCUCUUAACACCAAAAAAAAAAAAAAAAUUGAUUCUGGGACCAGGCUUCAUUUCCCCCAUCCAACUUUUGUUUUUUAUUCC
pyr-4523	GGAAUGUUGUCUGGCUCGAGG	gma-MIR166m	-43.50	0.60	DangsuA,DangsuB	UUUCGUUGCAAAGGUGAGGUUGAGAGGAAUGUUGUCUGGCUCGAGGUCAUGGAGGAGGAGGAGAGUAUUGAGAUGAGUGAAAGUUUCCAAUGGAAAUUUACCCUCUUAACACAAAAAAAAAAAUUGAUUCGCGGACCAGGCUUCAUUCCCCACACCCAACUUUUUUUUUUAUUCCU
pyr-3809	UGCCAAAGGAGAGUUGCCCUU	cme-MIR399g	-35.10	1.06	DangsuA,DangsuB	AGGGCUUCUCUCCAUUGGCAGGCAUAAUGACUUAGACUUUCAUGUUCUGCCAAAGGAGAGUUGCCCUUC
pyr-3809	UGCCAAAGGAGAGUUGCCCUU	cme-MIR399d	-39.40	1.04	DangsuA,DangsuB	GUAGAAGGGCUUCUCUCCAUUGGCAGGCAUAAUGACUUUGGCUUUCAUGUUCUGCCAAAGGAGAGUUGCCCUUCAUCUAGU
pyr-3809	UGCCAAAGGAGAGUUGCCCUU	cme-MIR399e	-34.60	0.89	DangsuA,DangsuB	GCAGAAGAGCUUCUCUCCAUUGGCAGGCGAAUUAUGGUUUAGCUUUCAUGUCCUGCCAAAGGAGAGUUGCCCUUCAUCUAGU
pyr-2821	GAGCUCCUUGAAGUCCAAUU	gma-MIR159e	-106.00	1.10	DangsuA,DangsuB	CAAAGGGGGUUAUGGAGUGGAGCUCCUUGAAGUCCAAUUGAGGAUCUUACUGGGUGGAUUGAGCUGCUUAGCUAUGGAUCCCACAGUUCUACCCAUCAUUAAGUGCUUUUGUGGUAGUCUUGUGGCUUCCAUAUCUGGGGAGCUUCAUUUGCCUUUAUAGUAUUAUCCUUCUUUGGAUUGAAGGGAGCUCUACACCCUUCUCCCCUUUUGU
pyr-2821	GAGCUCCUUGAAGUCCAAUU	pvu-MIR159a	-91.00	1.11	DangsuA,DangsuB	GUGGAGCUCCUUGAAGUCCAAUUGAGGAUCUUACUGGGUGGAUUGAGCUGCUUAGCUAUGGAUCCCACAGUUCUACCCAUCAGCAUGUUUUGUGGUAGUCUUGUGGCUUCCAUAUCUGGGGAGCUUCAUCUGCCUCUAUAGUAUCAUCCUUCUUUGGAUUGAAGGGAGCUCUAC
pyr-2821	GAGCUCCUUGAAGUCCAAUU	gma-MIR159a	-89.10	1.00	DangsuA,DangsuB	AAUUAAAGGGGAUUAUGAAGUGGAGCUCCUUGAAGUCCAAUUGAGGAUCUUACUGGGUGAAUUGAGCUGCUUAGCUAUGGAUCCCACAGUUCUACCCAUCAAUAAGUGCUUUUGUGGUAGUCUUGUGGCUUCCAUAUUUGGGGAGCUUCAUUUGCCUUUAUAGUAUUAACCUUCUUUGGAUUGAAGGGAGCUCUACACCCUUCUCUUCUUUUCU
pyr-2556	GUUCAAUAAAGCUGUGGGAA	bdi-MIR396c	-74.50	0.99	DangsuA,DangsuB	CGGUAGCAAAUCGCAUGGCCCUCUCUGUGAUCUUCCACAGCUUUCUUGAACUGCUCGGAUCUGCCUAAUUAGAUCACGGCUUGGGUUUGCACGAGAGGGCAGUUCAAUAAAGCUGUGGGAAAUUUCAGAGAGAGGCCAAUUGAUCGGCACAUA
pyr-2556	GUUCAAUAAAGCUGUGGGAA	mdm-MIR396a	-58.80	0.89	DangsuA,DangsuB	GAUCCUCUUUGUAUUCUUCCACAGCUUUCUUGAACAGCAUCCAUGUAUGACGAGAUCGACCGAUCUUUGGAGUGAGUCGACUCAGUCUCUCUAUUCCUCUUAACUUGGUUUGCGGUUCAAUAAAGCUGUGGGAAGAUACAGAUAGGCUC
pyr-2556	GUUCAAUAAAGCUGUGGGAA	bdi-MIR396d	-56.30	0.85	DangsuA,DangsuB	UAUUGGAUGCAUGCAUGGCCCUCUUUGCUAUCUUCCACAGCUUUCUUGAACUGCAUCUGCAAUGGAUGCUACUUAGCUUAUGCUUAACUGCAAGAGUGCUGUUCAAUAAAGCUGUGGGAAAUUGCAGAGAGAGACCAAUUGGGCAGCUUAAU
pyr-2556	GUUCAAUAAAGCUGUGGGAA	amg-MIR396	-62.30	0.97	DangsuA,DangsuB	CUAUGGCUCUCUCUGUAUUCUUCCACAGCUUUCUUGAACUGCAUCGAUCGAAGAAAGAGCAAGCUUUGUUCUCUCUUACAUGCAUGCCAAAUCGUCUUCUUGCGGUUCAAUAAAGCUGUGGGAAGAUACAGAUAGGGUCAACCAC
pyr-2556	GUUCAAUAAAGCUGUGGGAA	ata-MIR396e	-50.70	1.03	DangsuA,DangsuB	CUUUGCUGUCUUCCACAGCUUUCUUGAACUGCAUCUGCAAUUGGUGGAUGCUAGCUUCUGCUCGCAAGAUCUGCAGUUCAAUAAAGCUGUGGGAAAUUGCAGAGAG
pyr-2556	GUUCAAUAAAGCUGUGGGAA	lja-MIR396	-45.00	1.02	DangsuA,DangsuB	GUCCUCUUUGUAUUCUUCCACAGCUUUCUUGAACUGCAUUCAAUUGCAUGCAUGCCAUGACACUCUUAUUUUGCGGUUCAAUAAAGCUGUGGGAAGAUAUAGAUAGGG
pyr-2556	GUUCAAUAAAGCUGUGGGAA	cpa-MIR396	-39.00	1.22	DangsuA,DangsuB	UUCCACAGCUUUCUUGAACUGCAUGAUCUGUAUUAGGAGAAAAUUCUGUAUAUCGAUUGCGGUUCAAUAAAGCUGUGGGAAG
pyr-2556	GUUCAAUAAAGCUGUGGGAA	osa-MIR396a	-60.20	0.90	DangsuA,DangsuB	CUUUGUGAUCUUCCACAGCUUUCUUGAACUGCACGCAUGAUGAAUAAUCCCUUUGGUUAAUUGUGAUCUGGUCUCUGAGAGAUCGUAGUUAGACUCGAUCGGUUGCAUUGGCAUCAGAGAGAGCAGUUCAAUAAAGCUGUGGGAAAUUGCAGAG
pyr-2556	GUUCAAUAAAGCUGUGGGAA	bcy-MIR396a	-58.90	1.02	DangsuA,DangsuB	CCCUCUUUGUAUUCUUCCACAGCUUUCUUGAACUGCAUCUCUUAGUUUUGUUUUUGCAUGCCACGGUUUCUGGCUGGACGACAUGUGGAUUUGCGGUUCAAUAAAGCUGUGGGAAGAUACAGACAGGG
pyr-2556	GUUCAAUAAAGCUGUGGGAA	osa-MIR396b	-52.20	1.04	DangsuA,DangsuB	CUUUGUGGUCUUCCACAGCUUUCUUGAACUGCAUCUUUGAGAGAGAUUAGCAUCCCUAUGUGUGGAUUUUGCUUGCACGAGUGUGCAGUUCAAUAAAGCUGUGGGAAAUUACAGAG
pyr-2556	GUUCAAUAAAGCUGUGGGAA	cme-MIR396b	-54.10	0.87	DangsuA,DangsuB	UUUGUAUUCUUCCACAGCUUUCUUGAACUGCAUCCCUUCCUGAACUCAAUUCGCUCUUAAUUUCCCCUUUCUCGAUCUCUCGAUCGAUCUCAAAGCGUUUUUUGUUCAUCGAUUUUGUUGCGGUUCAAUAAAGCUGUGGGAAGAUACAGUC
pyr-2556	GUUCAAUAAAGCUGUGGGAA	cme-MIR396e	-51.20	1.00	DangsuA,DangsuB	CUUUGUAUUCUUCCACGGCUUUCUUGAACUGCAUUUCAUUAUCUGAUCUUUCUCUUCUUCCAAUUAUAUCUUUUUACAAUACAUACAUAUAUAUAUAUAUAUAUAUAUAUACGUAUUCCUCUUGCUAUGAAUUUCAAUGGCUGCAGUUCAAUAAAGCUGUGGGAAGAUACAAUA
pyr-2556	GUUCAAUAAAGCUGUGGGAA	sly-MIR396a	-57.80	1.34	DangsuA,DangsuB	UGAUUCUUUGUGUACUUUUCCACAGCUUUCUUGAACUGCAUACAUAUAACAAAAAAAUCUGAUUUUUUUUUGAUUUUUUUUUACUUUUAUAAAGAAAAAAUUUAGAUGGAAAGAAUUAAAUUGUUGCGGUUCAAUAAAGCUGUGGGAAGAUACAUAUAGGAUCA
pyr-2556	GUUCAAUAAAGCUGUGGGAA	ptc-MIR396a	-45.40	0.99	DangsuA,DangsuB	CUUGGUAUUCUUCCACAGCUUUCUUGAACUGCACCUAUUUGAAUAUUGUUGUUGAUGUUGCCGUGCAUGUACAUAUGACAUUGUAUUUUUGUUGCGGUUCAAUAAAGCUGUGGGAAGAUACAA
pyr-2556	GUUCAAUAAAGCUGUGGGAA	ptc-MIR396b	-49.30	1.01	DangsuA,DangsuB	CUUUGUAUUCUUCCACAGCUUUCUUGAACUGCACCUAUUAGAUUAAUGUUGAUGUUGUUGUGCGAUAUGCCAUGACCAUAUGACAUUGUAUUCAUUUUUGCUGCGGUUCAAUAAAGCUGUGGGAAGAUACAA
pyr-2556	GUUCAAUAAAGCUGUGGGAA	sbi-MIR396b	-62.70	1.03	DangsuA,DangsuB	AGAUGGCCUUCUUUGUGAUCUUCCACAGCUUUCUUGAACUGCAUCUCUAAGAGGAGCAGCUUGAACUCUCUACCUGCAUGAGCAGGUGCAGUUCAAUAAAGCUGUGGGAAACUGCAGAGAGAGGCCAA
pyr-2556	GUUCAAUAAAGCUGUGGGAA	mtr-MIR396b	-34.40	0.88	DangsuA,DangsuB	UAUUCUUCCACAGCUUUCUUGAACUGCAUCCAAAUUGAGUUCCUUUGCAUUGCCAUGGCCAUUGUUUUGCGGUUCAAUAAAGCUGUGGGAAGAUA
pyr-2556	GUUCAAUAAAGCUGUGGGAA	ghr-MIR396b	-46.50	0.89	DangsuA,DangsuB	CUUCGUAUUCUUCCACAGCUUUCUUGAACUGCAAUUUCAUGUAAUCAGAUCAUUCAUUCAUUCAUUGUCGUUGAUGGUGUUGCAUACAUACGAGUACGUUGUUGCGGUUCAAUAAAGCUGUGGGAAGAUACAAAC
pyr-2556	GUUCAAUAAAGCUGUGGGAA	ghr-MIR396a	-47.20	0.89	DangsuA,DangsuB	CUUCGUAUUCUUCCACAGCUUUCUUGAACUGCAAUUUCAUGUAAUCAGAUCAUUCAUUCAUUCGUUGUCGUUGAUGGUGCUGCAUAUAUACGAGUACGUUGUUGCGGUUCAAUAAAGCUGUGGGAAGAUACAAACA
pyr-2556	GUUCAAUAAAGCUGUGGGAA	bgy-MIR396a	-58.80	1.01	DangsuA,DangsuB	CCCUCUUUGUAUUCUUCCACAGCUUUCUUGAACUGCAUCUCUUAGAUUUGUUUUUGCAUGCCACGGUUUCUGGCUGGACGACUUGUGGAUUUGCGGUUCAAUAAAGCUGUGGGAAGAUACAGACAGGG
pyr-2556	GUUCAAUAAAGCUGUGGGAA	zma-MIR396b	-69.20	0.97	DangsuA,DangsuB	AGAUGGCCUUCUUUGUGAUCUUCCACAGCUUUCUUGAACUGCAUCUCUCAGAGGAGCGGCAGCUUCAACUCCUCCACCCGCAUCAGCAGGUGCAUGCAGUUCAAUAAAGCUGUGGGAAACUGCAGAGAGAGGCCAG
pyr-2556	GUUCAAUAAAGCUGUGGGAA	mes-MIR396a	-67.00	0.94	DangsuA,DangsuB	UGGCCCUCUUCGUAUUCUUCCACAGCUUUCUUGAACUGCAUCUCUACAACGAAGCUUGUGGUUAUUGCAUGCCACGGCUCGCCAAUUAAGCGGCUUCUUGUUUUCUUGUUUUGUUGCGGUUCAAUAAAGCUGUGGGAAGAUACUGACAGGGUCA
pyr-2556	GUUCAAUAAAGCUGUGGGAA	zma-MIR396a	-68.30	0.86	DangsuA,DangsuB	ACAUGGCCCUCCUUGCCGUCUUCCACAGCUUUCUUGAACUGCAUGCCGCCGGCUGGUGGAUGCUGCGCGCUUGAAUUCCGGUCGAUCCCAAGAGGCGCAGUUCAAUAAAGCUGUGGGAAACUGCAGAGAGAGGCCAC
pyr-2556	GUUCAAUAAAGCUGUGGGAA	aly-MIR396a	-57.40	0.91	DangsuA,DangsuB	UCUACGUGACCCUCUCUGUAUUCUUCCACAGCUUUCUUGAACUGCAAAACUUCUUCAGAUUUGUUUUUUUUAUAUAUAUGUCUUACGCAUAAAAUAGUGUUUUUGUUCACAUCUCUGCUCGAUUGAUUUGCGGUUCAAUAAAGCUGUGGGAAGAUACGGACAGAGUCAAAGA
pyr-2556	GUUCAAUAAAGCUGUGGGAA	lus-MIR396c	-56.50	1.26	DangsuA,DangsuB	GCCUCUGCUUUUAUCCUUCCACAGCUUUCUUGAACUGCAUAUAUAUAUAUAUGCGAAUUAGGGUUUUUGUAUUAUAAUUGUGUGCGGUUCAAUAAAGCUGUGGGAAGAUACAAUCAGGGC
pyr-2556	GUUCAAUAAAGCUGUGGGAA	lus-MIR396a	-54.30	1.02	DangsuA,DangsuB	UGGCUCUGCUUGUGUUCUUCCACAGCUUUCUUGAACUGCAUGGCAAAACCAGAGAUCUCUGAUGCAGCAGCAGUUCAAUAAAGCUGUGGGAAGAUACCCGCAGAAAGCCA
pyr-2556	GUUCAAUAAAGCUGUGGGAA	ath-MIR396a	-47.90	0.94	DangsuA,DangsuB	CUCUGUAUUCUUCCACAGCUUUCUUGAACUGCAAAACUUCUUCAGAUUUUUUUUUUUUUCUUUUGAUAUCUCUUACGCAUAAAAUAGUGAUUUUCUUCAUAUCUCUGCUCGAUUGAUUUGCGGUUCAAUAAAGCUGUGGGAAGAUACAGAC
pyr-2556	GUUCAAUAAAGCUGUGGGAA	sbi-MIR396a	-51.30	0.83	DangsuA,DangsuB	ACAUGGCCCUCCUUGCCGUCUUCCACAGCUUUCUUGAACUGCAUGCUGGUAGUGCUGUGUGCAUCCGUUCCAAUAUUCCAAGAGGCAGUUCAAUAAAGCUGUGGGAAAUUGCAGAGAGAGACCAG
pyr-2556	GUUCAAUAAAGCUGUGGGAA	gma-MIR396i	-64.00	1.02	DangsuA,DangsuB	UGGCCCUCUUUGUAUUCUUCCACAGCUUUCUUGAACUGCAUCCAUAGAGUUCCUUUGCAUGCAUGCCAAGGCACUCUUGCUCCCACACCUUGUUUUGCGGUUCAAUAAAGCUGUGGGAAGAUACAGAUAGGGUCA
pyr-2556	GUUCAAUAAAGCUGUGGGAA	tcc-MIR396b	-63.20	0.90	DangsuA,DangsuB	ACAUGGCCCUCUUUGUAUUCUUCCACAGCUUUCUUGAACUGCUACUUCUUAGAUCGUUCCUUCUUGUUGGCGGUGAUGUUGCAUGUGGGCUGCAUACGGGUAUGUUGUUGCAGUUCAAUAAAGCUGUGGGAAGAUACGGACAGGGUCAAAG
pyr-2556	GUUCAAUAAAGCUGUGGGAA	gma-MIR396a	-59.30	0.97	DangsuA,DangsuB	UCAUGGCUCUCUUUGUAUUCUUCCACAGCUUUCUUGAACUGCAUCCAAAGAGUUCCUUUGCAUGCAUGCCAUGGCACUCUUACUCCCAAAUCUUGUUUUGCGGUUCAAUAAAGCUGUGGGAAGAUACAGAUAGGGUCAAC
pyr-2556	GUUCAAUAAAGCUGUGGGAA	vvi-MIR396d	-46.70	0.99	DangsuA,DangsuB	CUUUGUAUUCUUCCACAGCUUUCUUGAACUGCAUUUUUCAGACUACUGGUGUGUUUUUGUAUGCACUCAAAGUCAUUGUAACAGUUGCGGUUCAAUAAAGCUGUGGGAAGAUACCAACAG
pyr-2556	GUUCAAUAAAGCUGUGGGAA	mes-MIR396b	-51.00	0.98	DangsuA,DangsuB	GAUCCUCUUUGUAUUCUUCCACAGCUUUCUUGAACUGCAUCUACUAUGAACUUGAUGAUUGUUGCAUGGCGGAUUCUUGUUUUUGUUUUGUUGCGGUUCAAUAAAGCUGUGGGAAGAUACUGAUAGGGUC
pyr-2556	GUUCAAUAAAGCUGUGGGAA	aqc-MIR396a	-44.00	0.94	DangsuA,DangsuB	UUCCACAGCUUUCUUGAACUGCAUGGUAAUCUAAUCUAAUACAGAUAAAAUUAAGCUUGUUCUUCAAGUACAUGGUGCCAUGGUGGUAUAUCGCCUUUGCGGUUCAAUAAAGCUGUGGGAAA
pyr-2556	GUUCAAUAAAGCUGUGGGAA	sof-MIR396	-67.60	1.02	DangsuA,DangsuB	AGAUGGCCUUCUUUGUGAUCUUCCACAGCUUUCUUGAACUGCAUCUCUAAGAGGAGCAGCUCGAAGCCUCGAACUCUACCUGCAUGAGCAGGUGCAGUUCAAUAAAGCUGUGGGAAACUGCAGAGAGAGGCCAA
pyr-2556	GUUCAAUAAAGCUGUGGGAA	mdm-MIR396b	-62.90	0.89	DangsuA,DangsuB	GAAGAUGAUGAUCCUCUUUGUAUUCUUCCACAGCUUUCUUGAACUGCAUCCAUCUAUGGCGAGAUCGACCGAUCUUUGGAGUGAGUCGACUCAGUAUCUCUAUUCCCCUUAACUUGGUUUGCGGUUCAAUAAAGCUGUGGGAAGAUACAGAUAGGCUCAAUAAAAUUC
pyr-2556	GUUCAAUAAAGCUGUGGGAA	csi-MIR396b	-61.90	1.19	DangsuA,DangsuB	UAUGAUCCUCUUUGUAUUUUUCCACAGCUUUCUUGAACUGCAUCAUCUUUGCAUGAGGCCACAGACUUGGCAUCGCAUUUGUUGCGGUUCAAUAAAGCUGUGGGAAGAUACAAACAGGUUCAAUAAAAUUUCAA
pyr-2556	GUUCAAUAAAGCUGUGGGAA	hbr-MIR396b	-64.40	0.91	DangsuA,DangsuB	AUGACCCUCUUCGUAUUCUUCCACAGCUUUCUUGAACUGCAUCUCUACUACGAACUGGUGGUUGUUGCAUGCCACGGCUGGCCAAUUAAGCGGCUUCUUGCUUCUUGUUUUGUUGCGGUUCAAUAAAGCUGUGGGAAGAUACUAACAGGGUCAA
pyr-2556	GUUCAAUAAAGCUGUGGGAA	aau-MIR396	-61.70	0.95	DangsuA,DangsuB	AGCUAUGGCUCUCUCUGUAUUCUUCCACAGCUUUCUUGAACUGCAUCGAUCGAAGAAAGAGCAAGCUUUGUUCUCUCUUACAUGCAUGCCAAAUCGUCUUCUCGCGGUUCAAUAAAGCUGUGGGAAGAUACAGAUAGGGUCAACCA
pyr-2954	UUAUUGAGUGCAGCGUUGAUG	lus-MIR397a	-38.50	1.01	DangsuA,DangsuB	GAUCAGAGAGACCUUAUUGAGUGCAGCGUUGAUGAAGUUCGUUCAUUCUCAGAUCUUCAGCAACGCUGCUCUCGAUAAUGUAUCUUUUUAUC
pyr-2954	UUAUUGAGUGCAGCGUUGAUG	lja-MIR397	-60.20	1.02	DangsuA,DangsuB	UCUCAGAUGAAUUGUAAAUUCCCAUAUUGGAUAAACAUUAUUGAGUGCAGCGUUGAUGAAGUCCUGAACUGCAUUGUGCUAUAAGGGAGAAGCCAAAUGCUUUUAUCGACGCUGCACUCAAUCAUGUUUUUUAGCAAUAUGGUUCAAUCGUGAGA
pyr-2954	UUAUUGAGUGCAGCGUUGAUG	osa-MIR397b	-48.60	0.84	DangsuA,DangsuB	AGGGAAGGCAUUAUUGAGUGCAGCGUUGAUGAACCUGCCGGCCGGCUAAAUUAAUUAGCAAGAAAGUCUGAAACUGGCUCAAAGGUUCACCAGCACUGCACCCAAUCACGCCUUUGCU
pyr-2730	AUCCAAAGGGAUCGCAUUGAUC	mes-MIR393a	-41.41	1.04	DangsuA,DangsuB	ACUAUAGGAGACAUCCAAAGGGAUCGCAUUGAUCCUAAAACUCUUCUCUUUCAUAAUUUAAUCUCUCUUUUGGAUCAUGCUAUCCCUUUGGAUUCCUCCUUUGGU
pyr-2730	AUCCAAAGGGAUCGCAUUGAUC	mes-MIR393b	-47.54	0.97	DangsuA,DangsuB	GCAACUAGAGGAGACAUCCAAAGGGAUCGCAUUGAUCCUAAGCUCUUCUUCUCUCCCCGUAUUUUAAUCUUUUGGAUCAUGCUAUCCCUUUGGAUUCCUCCUUUGGUAGC
pyr-2730	AUCCAAAGGGAUCGCAUUGAUC	ath-MIR393a	-46.20	0.98	DangsuA,DangsuB	AGAGGAAGGAUCCAAAGGGAUCGCAUUGAUCCUAAUUAAGGUGAAUUCUCCCCAUAUUUUCUUUAUAAUUGGCAAAUAAAUCACAAAAAUUUGCUUGGUUUUGGAUCAUGCUAUCUCUUUGGAUUCAUCCUUC
pyr-2730	AUCCAAAGGGAUCGCAUUGAUC	ath-MIR393b	-55.00	1.02	DangsuA,DangsuB	AGAGAAAGGAUCCAAAGGGAUCGCAUUGAUCCUAAUUAAGCUGAUUUAUUCCCCAAUAAUUGUUUUUUUUUUCCUUCUCAAUCGAAAGAUGGAAGAAAAACAAAUUCCAAACAUUUUGCUUACUUUUCCGGAUCAUGCGAUCUCUUUGGAUUCAUUCUUU
pyr-2730	AUCCAAAGGGAUCGCAUUGAUC	vvi-MIR393b	-45.50	1.11	DangsuA,DangsuB	GGAGGAGGCAUCCAAAGGGAUCGCAUUGAUCCCAAACUCUCCAUGUCUUUGGAUCAUGCUAUCCCUUUGGAUUCCUCCUUUGG
pyr-2730	AUCCAAAGGGAUCGCAUUGAUC	gma-MIR393d	-49.40	1.07	DangsuA,DangsuB	CUAGAGGAGGCAUCCAAAGGGAUCGCAUUGAUCCCAAAUCCAAGCUUCAAUGUUCUUCUAUCUUUCUCACUCAAAAUAUUAAUUUUAUUUGGGAUCAUGCUAUCCCUUUGGAUUUCUCCUUUA
pyr-2730	AUCCAAAGGGAUCGCAUUGAUC	gma-MIR393e	-57.00	1.02	DangsuA,DangsuB	GGAGGAGGCAUCCAAAGGGAUCGCAUUGAUCCCAAAUUUCAGAUUUAUAAAUUUGUCUUUCUCUUCCCUUGUCAAUAUUUGGGAUCAUUUCUCUUCCCUUCUCAAUAUUUGGGAUCAUGCUAUCCCUUUGGAUUCCUCCUU
pyr-2730	AUCCAAAGGGAUCGCAUUGAUC	gma-MIR393f	-50.10	1.14	DangsuA,DangsuB	GGAGGAGGCAUCCAAAGGGAUCGCAUUGAUCCCAAAUCCAAGCUUUAAUAUUUUUCUCUCUUCUCACUCAAUAAUAUUAAUUUAUUUGGGAUCAUGCUAUCCCUUUGGAUUUCUCCUU
pyr-2730	AUCCAAAGGGAUCGCAUUGAUC	gma-MIR393g	-55.00	1.15	DangsuA,DangsuB	AGAGGAGGCAUCCAAAGGGAUCGCAUUGAUCCCAAAUCCAAGCUUCAAUGUUCUUCUCUCUUUCUCACUCAAAAUGUUAAUUUUAUUUGGGAUCAUGCUAUCCCUUUGGAUGUCUCCUU
pyr-2730	AUCCAAAGGGAUCGCAUUGAUC	sbi-MIR393a	-75.30	1.08	DangsuA,DangsuB	ACAAUGCCUGGAGGAAGCAUCCAAAGGGAUCGCAUUGAUCCGUCACUCCUUCCAUUCUAUCAUGGGUGGUCGUCGUCUACAAGGACUUCGUUCCCGACGGAUCAUGCGAUCCUUUUGGAGGCUUCCUCUAGACAUUACU
pyr-2730	AUCCAAAGGGAUCGCAUUGAUC	gma-MIR393a	-47.90	1.02	DangsuA,DangsuB	GGAGGAGGCAUCCAAAGGGAUCGCAUUGAUCCCAAAUCCAAGCUUCAAUAUUCUUCUCUCUUUCCCACUCAAAAUAUUAAUUUUAUUUGGGAUCAUGCUAUCCCUUUGGAUUUCUCCUUU
pyr-2730	AUCCAAAGGGAUCGCAUUGAUC	gma-MIR393c	-51.70	1.10	DangsuA,DangsuB	GGAGGAGGCAUCCAAAGGGAUCGCAUUGAUCCCAAAUUUCAGAUUUAUAAAUUUUUCUCUUUCCCUCCCCUUCUCAAUAUUUGGGAUCAUGCUAUCCCUUUGGAUUCCUCCUU
pyr-2730	AUCCAAAGGGAUCGCAUUGAUC	osa-MIR393a	-61.00	0.97	DangsuA,DangsuB	UGGGGAAGCAUCCAAAGGGAUCGCAUUGAUCCUUCAUCGCUCUCGCUCGCUUCCAUGGCGGUCGUCGUCUACAAGCAGCUUGACGGAUCAUGCGAUCCUUUUGGAGGCUUCCUCU
pyr-2730	AUCCAAAGGGAUCGCAUUGAUC	atr-MIR393	-73.50	0.82	DangsuA,DangsuB	UUACGGUGGAGUUACAAAAGCGGUUUUGAUCUAGUAAGAAGCGGAUUUGGGGUUGCAGAGGGUGGAGAAAUCCAAAGGGAUCGCAUUGAUCCUUUUCAGUGCAAGCGGUUUUCCAAGGAUCAUGCGGUCUCUUAGGAUGUCUCCAUCUUAAUGCAAUAAAAUUGAGCUCCUCUUGUGAAAAGACAUUGAAGGUGGUUUCAGGUGA
pyr-2730	AUCCAAAGGGAUCGCAUUGAUC	bdi-MIR393a	-66.60	0.85	DangsuA,DangsuB	UGAGAGCGAGAGGGCAACAAUGUCUUGGGGAAGCAUCCAAAGGGAUCGCAUUGAUCCUUCGACUCCAUUAAUGGUGUUCGUCAUCGUCUGCUGAUUGUCGACGACGGAUCAUGCGAUCCUUUUGGAGGCUUCCUCUAGCCAUUACUACACUAAGCAUUC
pyr-2730	AUCCAAAGGGAUCGCAUUGAUC	cme-MIR393a	-31.91	0.78	DangsuA,DangsuB	GAGGAAGCAUCCAAAGGGAUCGCAUUGAUCCCAACUUAUAUAUUUACAGUUUUCUUUUCAUUUUCUUUCUUCUACAUAAUUUUGGAUCAUGCUAUCCCUUCGGAUUCCUCCUUU
pyr-2730	AUCCAAAGGGAUCGCAUUGAUC	cme-MIR393b	-41.56	0.76	DangsuA,DangsuB	CAGGAAGCAUCCAAAGGGAUCGCAUUGAUCCCACUUUGUAGCAAUUUUUUCUGUUUCUUUUUCUUUUUUUUUACCUUUUCAUGUUUUCUUUUUUACCCUCUUCUGCUAUGGAAUUUGGAUCAUGCCAUCUCUUUGGAUUCCUCCUGC
pyr-2730	AUCCAAAGGGAUCGCAUUGAUC	csi-MIR393	-44.30	0.85	DangsuA,DangsuB	UUCUGCAACUAGAGGAUAAAUCCAAAGGGAUCGCAUUGAUCCUAAGCCUUAAUUAUAAUUCCCAUACUUAAUAUUCAUUAGGACGAUGCUAUCCCUCUGGAUUCCUCCUUCGGUAGCUCAUAUGUAUAUAUAUAAUCUCUACAUA
pyr-2730	AUCCAAAGGGAUCGCAUUGAUC	ptc-MIR393b	-44.30	1.05	DangsuA,DangsuB	AGAGGAGGCAUCCAAAGGGAUCGCAUUGAUCCCGAGUGUCCCUGGCCAUAAUUUUGGAUCAUGCUAUCCCUUUGGAUUCCUCCU
pyr-2730	AUCCAAAGGGAUCGCAUUGAUC	ptc-MIR393a	-43.80	1.07	DangsuA,DangsuB	AGAGGAGGCAUCCAAAGGGAUCGCAUUGAUCCCAAGUGUCUGUCCCCCAUAAUUUUGGAUCAUGCUAUCCCUUUGGAUUCCUCCU
pyr-2730	AUCCAAAGGGAUCGCAUUGAUC	lus-MIR393a	-60.50	0.82	DangsuA,DangsuB	AAGAAUGGAGAAGAAAGAAGGUUUCCUGCAACUAGAGGAGGCAUCCAAAGGGAUCGCAUUGAUCCCAGCUACCCACCUACCUAACCAAAUUCAUAGUCUUGGAUCGUGCUAUCCCUUUGGAUUUCUCCUUUGGUAGCUUUGUGUUGUGUGCUUUUCUCUCAACUCUU
pyr-2730	AUCCAAAGGGAUCGCAUUGAUC	lus-MIR393c	-61.00	0.85	DangsuA,DangsuB	AAGAAUUGAAAGAAGUUGGUUUCCUGCAACUAGAGGAGGCAUCCAAAGGGAUCGCAUUGAUCCCAGCUACCUACCUGCCUAACCAAAUUCACAGUCUUGGAUCAUGCUAUCCCUUUGGAUUUCUCCUUUGGUAGCUUUGGGUUGUGUGUUUUUCUCUCAACUCUU
pyr-2730	AUCCAAAGGGAUCGCAUUGAUC	aly-MIR393a	-49.60	0.94	DangsuA,DangsuB	AGCAACUAGAGGAAGGAUCCAAAGGGAUCGCAUUGAUCCUAAUAAAGGUGAAUUACCCCAAUCUUUUCUUAAUAAUUAGCAAACAAAUCAAAAAAAUUUGCUUGGUUUUGGAUCAUGCUAUCUCUUUGGAUUCAUCCUUCGGUAGCU
pyr-2730	AUCCAAAGGGAUCGCAUUGAUC	ppe-MIR393a	-40.70	1.02	DangsuA,DangsuB	UAGAGGAAGCAUCCAAAGGGAUCGCAUUGAUCCCAACUAGCUAUCUCUUCCAUGGUUUAAUUUGGAUCAUGCUAUCCCUUUGGAUAUCUCCUUUG
pyr-2730	AUCCAAAGGGAUCGCAUUGAUC	tcc-MIR393a	-51.14	1.04	DangsuA,DangsuB	GCCAAGUACUAGAGGAGGCAUCCAAAGGGAUCGCAUUGAUCCUUUAUUUUCAACCCUUUCUUCUUUCUCACAAUUUUGGAUCAUGCUAUCCCUUUGGAUUCCUCCUUUGGUUAGCUUU
pyr-2730	AUCCAAAGGGAUCGCAUUGAUC	aly-MIR393b	-54.30	0.95	DangsuA,DangsuB	AGCAACUAGAGAAAGCAUCCAAAGGGAUCGCAUUGAUCCUAAUUAAGCUGAUUUAUUCCCCAAUAUUUUAUUUUCCUCAUUCGAAAGUUGGAGAAAAAAAAAAAAAAUUCUAAACAUUUGCUUUCUUUUCCGGAUCAUGCGAUCUCUUUGGAUUCAUUCUUUGGUAGCU
pyr-2730	AUCCAAAGGGAUCGCAUUGAUC	mtr-MIR393b	-41.60	1.01	DangsuA,DangsuB	AGGCAUCCAAAGGGAUCGCAUUGAUCCCAAAUCUAAUUAAGUCCCUAGCUACUUAAUUAACAACUUAAUUUCCUUAAUAUCUCAUAAUAUUUGGGAUCAUGCUAUCCCUUUGGAUUCAU
pyr-2730	AUCCAAAGGGAUCGCAUUGAUC	mtr-MIR393a	-47.98	0.98	DangsuA,DangsuB	AACUGCAACUUGAGGAGGCAUCCAAAGGGAUCGCAUUGAUCCUAUAAUAUUUCAACUUUAGUCACUUUAAUUUUCUCUCAUAUAAUACUUAAUUGGGAUCAUGCCAUCCCUUUGGAUUUCUCCUUUAGUAGCUAC
pyr-3394	UAAAGCUCAGGAGGGAUAGCG	sly-MIR390b	-55.70	1.14	DangsuA,DangsuB	GCAUGGAGAAUCUGUAAAGCUCAGGAGGGAUAGCGCCAUGGAUGACUCAAUUCGAUUUUUGUACACAUCUUUAGCGCUAUCCAUCCUGAGUUUCACGGCUUUUUCAUGC
pyr-3394	UAAAGCUCAGGAGGGAUAGCG	tcc-MIR390b	-58.50	1.06	DangsuA,DangsuB	AAAGUAUGGGAGAAUCUGUAAAGCUCAGGAGGGAUAGCGCCAUCUCGACGAGGUUGUGUUUUAAAUGUUCAUCAGCUGGCGCUAUCUAUCCUGAGUUUCAUGGGUUCUUCCUGCUAUGUG
pyr-3394	UAAAGCUCAGGAGGGAUAGCG	gma-MIR390e	-54.00	0.96	DangsuA,DangsuB	GAAGAAUUUGUAAAGCUCAGGAGGGAUAGCGCCAUGGAAGGUCUUUCUACUAAUUUGCUCUAUCAUGGGUGCUUUGGUUUCGAUCGAUCUUCUCUAGCGCUACCCAUCCUGAGUUUCAUGGUUUCUU
pyr-3394	UAAAGCUCAGGAGGGAUAGCG	atr-MIR390	-60.00	1.03	DangsuA,DangsuB	GUGAAAUCAAAGAAAGCGUUGAGAAUCGGUAAAGCUCAGGAGGGAUAGCGCCUCUUUUUAAUCUGCAUAUAUAACUCAGAUCAAUGUUGAGGCGCUAUCUAUCCUGAGUUUUACGGUUUCUCCUUGCUCUGUAACCUUCAU
pyr-3394	UAAAGCUCAGGAGGGAUAGCG	nta-MIR390c	-49.30	1.10	DangsuA,DangsuB	GAGAAUCUGUAAAGCUCAGGAGGGAUAGCGCCAUGGAUGAAUAUUAGUAACACUAUUGCUUGUUUUAGCCAUCUGUAGCGCUAUCCAUCCUGAGUUUCAUAGCUUCUU
pyr-3394	UAAAGCUCAGGAGGGAUAGCG	gma-MIR390a	-44.50	0.95	DangsuA,DangsuB	AGAAUCUGUAAAGCUCAGGAGGGAUAGCGCCAUGGAUGAUCUUCUCUUCACUCUUGAUCUUCUCUUGCGCUAUCCAUCCUGAGUUUCAUGGCUUCUAUCUUCACA
pyr-3394	UAAAGCUCAGGAGGGAUAGCG	lus-MIR390a	-64.70	0.89	DangsuA,DangsuB	GAUUCAGAGAAGAUUCAAAGUAUAGGAAGAAUCUGUAAAGCUCAGGAGGGAUAGCGCCAUUGGAUCCUGACCUUACACGUAUGGAUUCAUGGAUUCUGGCGCUAUCCAUCCUGAGUUUCAUGGCUUCUUCUUGCUCUCCCAACACCCAUUCUUCUUCUUCUUAUC
pyr-3394	UAAAGCUCAGGAGGGAUAGCG	gma-MIR390c	-39.20	0.91	DangsuA,DangsuB	UGUAAAGCUCAGGAGGGAUAGCGCCAUGGAUGAUCUCUUCUCCACUCUUGAUCUUCUCUUGCGCUAUCCAUCCUGAGUUUCAUGGCUUCU
pyr-3394	UAAAGCUCAGGAGGGAUAGCG	lus-MIR390d	-54.80	1.00	DangsuA,DangsuB	AGUAUCAGAAGAAUCUGUAAAGCUCAGGAGGGAUAGCGCCAUACAAUUCGAUCCUGACCUUGCACGGAUUCGAUCACUUUGGCGCUAUCCAUCCUGAGUUUCAUCGCUUCUUCUUGCU
pyr-3394	UAAAGCUCAGGAGGGAUAGCG	nta-MIR390b	-48.60	1.08	DangsuA,DangsuB	AGAAUCUGUAAAGCUCAGGAGGGAUAGCGCCAUGGAUGAAUAUUAGUAACACUAUUGCUUGUUUUAGCCAUCUGUAGCGCUAUCCAUCCUGAGUUUCAUAGCUUCUUC
pyr-3394	UAAAGCUCAGGAGGGAUAGCG	gma-MIR390g	-50.90	1.16	DangsuA,DangsuB	AUCUGUAAAGCUCAGGAGGGAUAGCGCCACGACACUCAUGAUUUUCACAUCAUAGUGUAUUUGGCGCUAUCUAUCCUGAGUUUCACGGGUUUUUCUUACUGU
pyr-3394	UAAAGCUCAGGAGGGAUAGCG	gma-MIR390f	-49.80	1.19	DangsuA,DangsuB	AGAAUCUGUAAAGCUCAGGAGGGAUAGCGCCACAACACUCAUGAUUUUAUAUCAUAAUAUAUUUGGCGCUAUCUAUCCUGAGUUUCACGGGUUCUUCUUACGG
pyr-3394	UAAAGCUCAGGAGGGAUAGCG	aly-MIR390a	-50.40	1.01	DangsuA,DangsuB	CCAAAAAACAAGUAGAGAAGAAUCUGUAAAGCUCAGGAGGGAUAGCGCCAUGAUGAUCUUAUUUCAUAUCGAUUUUUUGGCGCUAUCCAUCCUGAGUUUCAUUGGCUCUUCUUACUACAAUGUAAAAGG
pyr-3394	UAAAGCUCAGGAGGGAUAGCG	bna-MIR390a	-63.00	1.07	DangsuA,DangsuB	AUUUCAGGUGAUGUAGUUGAGAAGUAGCUGUAAAGCUCAGGAGGGAUAGCGCCAUGUCUCACCGGUACUAUAAAAUGUUUGUAUAUCUAUAUUGGCGCUAUCCAUCCUGAGUUCUAUGGCUUCUUCUUGCUUUUAUCCUGAGAU
pyr-3394	UAAAGCUCAGGAGGGAUAGCG	bna-MIR390c	-55.80	1.01	DangsuA,DangsuB	GCGUAGUAGAGAAGUAGCUGUAAAGCUCAGGAGGGAUAGCGCCAUGACUCAUCACCAUUACUAUAUGUCUUUGUAUAUGUAAUGGCGCUAUCCAUCCUGAGUUCCAUGGCUUCUUCUUGCUUUUAUGU
pyr-3394	UAAAGCUCAGGAGGGAUAGCG	bna-MIR390b	-48.40	1.03	DangsuA,DangsuB	GUAGAGAAGAAUCUGUAAAGCUCAGGAGGGAUAGCGCCAUCAUGAUCACACACAUCGAUAUUUUUGGCGCUGUCCAUCCUGAGUUUCAUUGGCUCUUCUUACUAC
pyr-3394	UAAAGCUCAGGAGGGAUAGCG	lja-MIR390b	-49.00	0.92	DangsuA,DangsuB	GUGUGGAAAAUCUGUAAAGCUCAGGAGGGAUAGCGCCAUGGAUGGUCUGGAUCUCUUGCAUUAUUUGUUGUGAUCUUCUCUAGCGCUAUCCAUCCUGAGUUUCAUGGCUUCUUCAUAC
pyr-3394	UAAAGCUCAGGAGGGAUAGCG	aly-MIR390b	-49.90	0.96	DangsuA,DangsuB	AGUAGAAAAAUAGCUAUAAAGCUCAGGAGGGAUAGCGCCAUGAAUCACCAAUACUGUAGGUUUUGUAUAUACAUGCAUGUAGAUCUGUUGGCGCUAUCCAUCCUGAGUUCCAUAGCUUCUUCUUGCU
pyr-3394	UAAAGCUCAGGAGGGAUAGCG	ppe-MIR390	-44.70	1.24	DangsuA,DangsuB	CUGUAAAGCUCAGGAGGGAUAGCGCCAUAUGAACAAAAUGGUUUAAUUUAUAUUAGGCAUUUGUUUUGGCGCUAUCUAUCCUGAGUUUCAUGG
pyr-3394	UAAAGCUCAGGAGGGAUAGCG	ath-MIR390a	-49.70	1.10	DangsuA,DangsuB	GUAGAGAAGAAUCUGUAAAGCUCAGGAGGGAUAGCGCCAUGAUGAUCACAUUCGUUAUCUAUUUUUUGGCGCUAUCCAUCCUGAGUUUCAUUGGCUCUUCUUACUAC
pyr-3394	UAAAGCUCAGGAGGGAUAGCG	ath-MIR390b	-57.00	1.08	DangsuA,DangsuB	GAGAAAUAGCUAUAAAGCUCAGGAGGGAUAGCGCCAUGGCUCACCAGUGCUGUAUGUUUUGUAUAUGCGUACAUGUAUAUCUGUUGGCGCUAUCCAUCCUGAGUUCCAUAGCUUCUUCUU
pyr-3394	UAAAGCUCAGGAGGGAUAGCG	cme-MIR390a	-40.70	0.80	DangsuA,DangsuB	AGAAUCUGUAAAGCUCAGGAGGGAUAGCGCCACCAAAUAUAAGAAAGAUUACCCGAAUAUAUUCAUUUUCGUCGCCCUGCUUUCCGGCGCUAUCUAUCCUGAGUUUCAUGGCUUCU
pyr-3394	UAAAGCUCAGGAGGGAUAGCG	cme-MIR390b	-54.30	1.06	DangsuA,DangsuB	UUAGUAUGGAAGAACCUGUAAAGCUCAGGAGGGAUAGCGCCAAUUAAUAUUACAAAAAUUUCAUUCAAAGCUUCACACUUUGCUUUUGUUGAUGGCGCUAUCUAUCCUGAGUUUCAUAGCUUCUUCUUGCUCGA
pyr-3394	UAAAGCUCAGGAGGGAUAGCG	mdm-MIR390a	-61.60	1.12	DangsuA,DangsuB	AGUAAGGGAGAAUCUGUAAAGCUCAGGAGGGAUAGCGCCAUAUGAACAAAGGGUCUAUUUACUAGGUGGGCGUUUCUUUGUUCAUCAUGCGCUAUCCAUCCUGAGUUUCAUGGCUUCUUCAUACU
pyr-3394	UAAAGCUCAGGAGGGAUAGCG	mdm-MIR390c	-54.20	1.04	DangsuA,DangsuB	AGUAAGGGAGGAUCUGUAAAGCUCAGGAGGGAUAGCGCCAGAUGAAUUAACCAAGAUUCUAACAAUUAAGCGUUUAUUUGGUCAUCAUCUGAUGCUAUCCAUCCUGAGUUUCAUGGCUUCUUCUUACU
pyr-3394	UAAAGCUCAGGAGGGAUAGCG	bra-MIR390	-48.40	1.03	DangsuA,DangsuB	GUAGAGAAGAAUCUGUAAAGCUCAGGAGGGAUAGCGCCAUCAUGAUCACACACAUCGAUAUUUUUGGCGCUGUCCAUCCUGAGUUUCAUUGGCUCUUCUUACUAC
pyr-2609	UGAAGCUGCCAGCAUGAUCUC	lus-MIR167a	-52.20	0.93	DangsuA,DangsuB	CGUGCGCCACUACAGCAGUUGAAGCUGCCAGCAUGAUCUCAACUUUUGCUCUCCCUCAGAGCGCAAAGAUGAAAGAUCAUCUGGCAGUUUCACCUUUUGUUGGCUCCACG
pyr-2609	UGAAGCUGCCAGCAUGAUCUC	vvi-MIR167c	-36.90	0.86	DangsuA,DangsuB	CAGUAGCAGUUGAAGCUGCCAGCAUGAUCUCAACUUCCCUAUACAAGUCAAGGAAAGAUCAGAUCAUGUGGUAGCCUCACCUGUUGAUGGG
pyr-2607	UGAAGCUGCCAGCAUGAUCUA	sbi-MIR167i	-59.10	0.86	DangsuA,DangsuB	AGUGAAGCUGCCAGCAUGAUCUAGCUUUGGUUGGCACCAUUGGCAGGCGCCCACACAGUGGCCUCUUCCGUGUGUGUAGUGCCGCUCUGUACCUGCAAAUCAUUGUUAGAUCAUGCAUGACAGCCUCAUUUC
pyr-2607	UGAAGCUGCCAGCAUGAUCUA	nta-MIR167e	-29.60	0.74	DangsuA,DangsuB	ACUAGUAGUUGAAGCUGCCAGCAUGAUCUAAACUUUUCUAGUUGCUCCGUUGAGGAAAGAUCAGAUCAUGUAGCAGCAUCACCUGUUGAUGGU
pyr-2607	UGAAGCUGCCAGCAUGAUCUA	nta-MIR167d	-43.10	1.11	DangsuA,DangsuB	CACUAUCAGUUGAAGCUGCCAGCAUGAUCUAAACUUACCUCUUGUAAUAAUUAAGUUUGAGGGAAGAUUAGAUCAUGUGGUAGCUUCACCCGUUAGUUG
pyr-2607	UGAAGCUGCCAGCAUGAUCUA	mtr-MIR167a	-100.70	0.95	DangsuA,DangsuB	AAAAGUGAAGCUGCCAGCAUGAUCUAGGUUUGGUUAUACAAUAGUAGUAUUGAGAAGGAACUAUAUACGUUUUUUUUUUACUAUACCACAAAAAAAGAUUACUCUCUUUCACAAAAUAGGUAUUAAAGUGCCAUGAUUUUUGCAUUACUAAUGGGAAAAUAAAUUUUGGACACCGAAUUUCUCACUUUUUUUUUAUAUAGAUAGGAAAUAGGUUUUGGUGGUAUUUUUUUGUGGUACAGUAAAAAAUAGCCGCUAUAUCCAUACAAGUAGUACUGCUAGCAUAACCCUGACUAGGUCAUGCUGUGCUAGCCUCACUCCUU
pyr-2607	UGAAGCUGCCAGCAUGAUCUA	cpa-MIR167b	-33.40	0.93	DangsuA,DangsuB	UGAAGCUGCCAGCAUGAUCUAGCUAGCUUUAAUGGUUAUAGAAGAAAUGAUAACCCUAGUUAGGUCAUGCUCUGACAGCCUCACU
pyr-2607	UGAAGCUGCCAGCAUGAUCUA	sbi-MIR167a	-49.50	0.95	DangsuA,DangsuB	UGAAGCUGCCAGCAUGAUCUAGCUCUGAGUGAUCACCCGAGAAGAACAAUAGUUCGAGGUGGUCUCGCCUUGCUAGGUCAUGCUGCGGCAGCCUCA
pyr-2607	UGAAGCUGCCAGCAUGAUCUA	mes-MIR167c	-44.40	0.89	DangsuA,DangsuB	GGGAAAAGGUGAAGCUGCCAGCAUGAUCUAGCUUUGGUUAGAGGGAAAGAGAAGGGUUGAUUUUACUAACCCUAACUAGGUCAUGCUCUGACAGCCUCACUCUUUCCU
pyr-2607	UGAAGCUGCCAGCAUGAUCUA	cpa-MIR167a	-33.40	0.93	DangsuA,DangsuB	UGAAGCUGCCAGCAUGAUCUAGCUAGCUUUAAUGGUUAUAGAAGAAAUGAUAACCCUAGUUAGGUCAUGCUCUGACAGCCUCACU
pyr-2607	UGAAGCUGCCAGCAUGAUCUA	bna-MIR167a	-52.90	0.96	DangsuA,DangsuB	GGUGUACAGGCAUCUGAUGAAGCUGCCAGCAUGAUCUAAUUAACUUUCUUUCUCUGUUGAUUUUAUGACAAUGGAAAAGAGAUGAGUGUCGAUUAGAUCAUGUUCGCAGUUUCACCCAUUGACUGUCGCACC
pyr-2607	UGAAGCUGCCAGCAUGAUCUA	vvi-MIR167d	-45.30	0.79	DangsuA,DangsuB	AGGGAAUAAGUGAAGCUGCCAGCAUGAUCUAGCUUUGGCUAGGGAUACAGAGAAAGAGAGAGAUCAGAGCUAACCCUAGCUAGGUCAUGCCCUGACAGCCUCACUCCUUCCUUCU
pyr-2607	UGAAGCUGCCAGCAUGAUCUA	bna-MIR167c	-55.50	0.94	DangsuA,DangsuB	GGUGCACCGGCAUCUGAUGAAGCUGCCAGCAUGAUCUAGUUAACUUUAUUUCUCCGUUGUUUAUCCAUGACAAUGGAAAAGGGAUAAGUGUCGAUUAGAUCAUGUUCGUAGUUUCACCCGUUGACUGUCGCAUC
pyr-2607	UGAAGCUGCCAGCAUGAUCUA	bna-MIR167b	-47.30	0.82	DangsuA,DangsuB	GGCGCACCGGCAUCUGAUGAAGCUGCCAGCAUGAUCUAAUUAUCUUUCUUUCUCUGUUGACGAUGGAAAAGACAUGAGUGUUGAUUAGAUCAUGUUCGCAGUUUCACCCGUUGACUGUCUCGCC
pyr-2607	UGAAGCUGCCAGCAUGAUCUA	bra-MIR167a	-55.50	0.94	DangsuA,DangsuB	GGUGCACCGGCAUCUGAUGAAGCUGCCAGCAUGAUCUAGUUAACUUUAUUUCUCCGUUGUUUAUCCAUGACAAUGGAAAAGGGAUAAGUGUCGAUUAGAUCAUGUUCGUAGUUUCACCCGUUGACUGUCGCAUC
pyr-2607	UGAAGCUGCCAGCAUGAUCUA	bra-MIR167c	-52.90	0.96	DangsuA,DangsuB	GGUGUACAGGCAUCUGAUGAAGCUGCCAGCAUGAUCUAAUUAACUUUCUUUCUCUGUUGAUUUUAUGACAAUGGAAAAGAGAUGAGUGUCGAUUAGAUCAUGUUCGCAGUUUCACCCAUUGACUGUCGCACC
pyr-2607	UGAAGCUGCCAGCAUGAUCUA	bra-MIR167b	-52.90	0.96	DangsuA,DangsuB	GGUGUACAGGCAUCUGAUGAAGCUGCCAGCAUGAUCUAAUUAACUUUCUUUCUCUGUUGAUUUUAUGACAAUGGAAAAGAGAUGAGUGUCGAUUAGAUCAUGUUCGCAGUUUCACCCAUUGACUGUCGCACC
pyr-2607	UGAAGCUGCCAGCAUGAUCUA	lja-MIR167c	-54.10	0.90	DangsuA,DangsuB	GGUCACAAUGGAAAUAGUGAAGCUGCCAGCAUGAUCUAGCUUUGGUUAGUGAGAGGAGCAACAGAUCAAUGCUAACCCUCACUAGGUCAUGCUGUGCUAGCCUCACUCCUUCCUAUUUGGAGACC
pyr-2607	UGAAGCUGCCAGCAUGAUCUA	bra-MIR167d	-47.30	0.82	DangsuA,DangsuB	GGCGCACCGGCAUCUGAUGAAGCUGCCAGCAUGAUCUAAUUAUCUUUCUUUCUCUGUUGACGAUGGAAAAGACAUGAGUGUUGAUUAGAUCAUGUUCGCAGUUUCACCCGUUGACUGUCUCGCC
pyr-2607	UGAAGCUGCCAGCAUGAUCUA	lja-MIR167a	-54.10	0.77	DangsuA,DangsuB	ACAAAGAGUUGAGUUCACAAGGGAAAAAGUGAAGCUGCCAGCAUGAUCUAGCUUUGGUUAGAGAAAGAGGUAGAGUGCUAAUGAAUUAACUGCUAACCCUGACUAGGUCAUGCUGCGACAGCCUCACUCCUUCCUAUUUGGGGACCCAGUUGU
pyr-2607	UGAAGCUGCCAGCAUGAUCUA	ghr-MIR167a	-49.10	0.96	DangsuA,DangsuB	GGGAAAAAGUGAAGCUGCCAGCAUGAUCUAUCUUCCGUUAGUAAGAUGCGGAUGCUAUAUUGCUAACCCUAGCUAGGUCAUGCUGCGACAGCCUCACUCCUUCCU
pyr-2607	UGAAGCUGCCAGCAUGAUCUA	zma-MIR167a	-87.30	0.87	DangsuA,DangsuB	UGCUCUUGCGAAUGAGUGAAGCUGCCAGCAUGAUCUAGCUCUGAUUUGGUUGGCACCAUAUUAGCAGGCGUCCACGCACAGCUAGACUAGAGUGGCCUCGCGCGCUCUCGUCUGGUCUGUGUCUCGCUUUGUGCCUGCAAAUCGUUGUUAGAUCAUGCAUGACAGCCUCAUUCCUUCACAAUUCUGGGGC
pyr-2607	UGAAGCUGCCAGCAUGAUCUA	zma-MIR167b	-70.10	1.08	DangsuA,DangsuB	AGUGCCCAAGAUAAAGGGUGAAGCUGCCAGCAUGAUCUAACGACGGCAUUGCUCUGCUGCUGCAGUGAGGCUUGCGAGUGAUGGUUAGAUCAUGCUGUGACAGUUUCACUCUUUCCCUUUGGGCACA
pyr-2607	UGAAGCUGCCAGCAUGAUCUA	ghr-MIR167b	-58.10	1.14	DangsuA,DangsuB	GCGUGAACCUACAAGCAGUUGAAGCUGCCAGCAUGAUCUAAACUUCCUUCUCUGUUGAGGGAUAGAUGGGAUCAUGUGGUAGCUUCACCUGUUGUUGGGAUCACGA
pyr-2607	UGAAGCUGCCAGCAUGAUCUA	zma-MIR167d	-75.20	1.07	DangsuA,DangsuB	UGCCCAAGGGAACGAGUGAAGCUGCCAGCAUGAUCUAGCUCUGAGUGAUCACCCGAAAAAGAACAAUAGUUCUAGGUGGUCAUGCCUUGCUAGGUCAUGCUGCUGCAGCCUCACUUCUUCCCGUCGUUGGGCA
pyr-2607	UGAAGCUGCCAGCAUGAUCUA	osa-MIR167b	-83.60	1.00	DangsuA,DangsuB	GUGCCCAAGAGAAAGCGUGAAGCUGCCAGCAUGAUCUAACUUGCAGACAAGAAAUCAGCUCAGCUCGCUGGUUUCGAACAGGAAGGCGGCUAGCUGAGGCUUCUUCUGAGUACGUGAUGGUUAGAUCAUGCUGUGACAGUUUCACUCCUUCCCUGUUGGGCAC
pyr-2607	UGAAGCUGCCAGCAUGAUCUA	ath-MIR167a	-57.00	0.90	DangsuA,DangsuB	UGGUGCACCGGCAUCUGAUGAAGCUGCCAGCAUGAUCUAAUUAGCUUUCUUUAUCCUUUGUUGUGUUUCAUGACGAUGGUUAAGAGAUCAGUCUCGAUUAGAUCAUGUUCGCAGUUUCACCCGUUGACUGUCGCACCC
pyr-2607	UGAAGCUGCCAGCAUGAUCUA	ath-MIR167b	-44.50	0.91	DangsuA,DangsuB	GGGAACAAGUGAAGCUGCCAGCAUGAUCUAUCUUUGGUUAAGAGAUGAAUGUGGAAACAUAUUGCUUAAACCCAAGCUAGGUCAUGCUCUGACAGCCUCACUCCUUCCU
pyr-2607	UGAAGCUGCCAGCAUGAUCUA	osa-MIR167a	-65.20	1.05	DangsuA,DangsuB	UAGUGUGAAUGAGUGAAGCUGCCAGCAUGAUCUAGCUCUGAUUAAUCGGCACUGUUGGCGUACAGUCGAUUGACUAAUCGUCAGAUCUGUGUGUGUAAAUCACUGUUAGAUCAUGCAUGACAGCCUCAUUUCUUCACACUG
pyr-2607	UGAAGCUGCCAGCAUGAUCUA	bdi-MIR167b	-90.80	0.93	DangsuA,DangsuB	GUGCUACUUACUUACUGCCCGAGGGAACGAGUGAAGCUGCCAGCAUGAUCUAGCUCAGCGUGAUCAAGCAAGAUUCACACAUACACGUGUGGUUUUUUUGAGCUAUAGCUCGAUUGAUCUUGAGGUCAUGCCUUGCUAGGUCAUGCUGCGGCAGCCUCACUUCUUCCCGCCGUUUGGGCAUGCACAGCUG
pyr-2607	UGAAGCUGCCAGCAUGAUCUA	bdi-MIR167a	-28.50	0.55	DangsuA,DangsuB	AGAGAAAGCGUGAAGCUGCCAGCAUGAUCUAUCUGACUUGUGGUGGCAAGUGCCACAGCAAAUUCAGCAACGCCGUGGCUUCGGGGCCGGC
pyr-2607	UGAAGCUGCCAGCAUGAUCUA	tcc-MIR167b	-50.80	0.75	DangsuA,DangsuB	GAAUUCUGCAGUGGAAAAAGUGAAGCUGCCAGCAUGAUCUAUCUUUGGUUAGUGAGUGAAAGGGGGUGCUAAGGCUAUGUUGCUAACCCUAGCUAGGUCAUGCUCUGACAGCCUCACUCCUUCCUACUUGGGGACCCA
pyr-2607	UGAAGCUGCCAGCAUGAUCUA	bdi-MIR167f	-49.80	1.08	DangsuA,DangsuB	GUGAAAGAGUGAAGCUGCCAGCAUGAUCUAGCUUUGAUCCAAUGUAUGUCUCUACGUGUGGAUCCUUGUUAGAUCAUGCCUGACAGCCUCAUUUCUUCGCAA
pyr-2607	UGAAGCUGCCAGCAUGAUCUA	tcc-MIR167a	-61.10	1.11	DangsuA,DangsuB	GCCGUGCACCCACUAGCAGUUGAAGCUGCCAGCAUGAUCUAAACUUCCUUCUCUGUCGAGAGGAUAGAUUGGAUCAUGUGGUAGCUUCACCUGUUGUUGGGAUCACGAAGA
pyr-2607	UGAAGCUGCCAGCAUGAUCUA	mdm-MIR167d	-49.80	0.98	DangsuA,DangsuB	UCGUGGACCAAUAGCGGUUGAAGCUGCCAGCAUGAUCUAAACUUCCCUCUUGGUCAAGGAAAGAUCAGAUCAUGUGGUAGCUUCACCUGUUGAUGGGGAUCACGA
pyr-2607	UGAAGCUGCCAGCAUGAUCUA	mdm-MIR167f	-75.50	0.72	DangsuA,DangsuB	UCUCUGAAGCCUCCAAGAUGAAAGAAGAACAGAAAGAAGGAGAAGAAGAAUGACCUAGCUACUUGCUAUCUUAUCGUGCACCUCCAAUAGUUGAAGCUGCCAGCAUGAUCUAAGCUUUCUUUGUACAUAGGACAGGCUAGAUCAUGUGGUCGCUUCACCUGUUGAAUGAAGCACGAGAAAACCCUAGAUUCACAGCCAUCGACCUCCUCAAGAACCCAUUAGGGUUUUUUUUUUUUUUUUCGGAGA
pyr-2607	UGAAGCUGCCAGCAUGAUCUA	mdm-MIR167g	-65.70	0.89	DangsuA,DangsuB	AGAAUGACCUAGCUAGAGUGCUUGCUAUCUUAUCGUGCACCUCCAACAGUUGAAGCUGCCAGCAUGAUCUAAGCUAUCUUUGUAUACAGGAAAGGCUAUAGAUCAUGUGGUAGCUUCACCUGUUGAAUGAAGCACGAGAAAAACCCUAGAUUCACAGCGGUCGAUCU
pyr-2607	UGAAGCUGCCAGCAUGAUCUA	mdm-MIR167b	-49.60	0.99	DangsuA,DangsuB	GGGAAAAAGUGAAGCUGCCAGCAUGAUCUAGCUUUGGCUAAAGAUGUAUAUAAUCACGUAUAUAUGUAUCAGUUCUAUUAACCCUGGCUAGGUCAUGCUCUGACAGCUUCACUCCUUCCU
pyr-2607	UGAAGCUGCCAGCAUGAUCUA	mdm-MIR167c	-39.40	1.06	DangsuA,DangsuB	UAGCAGUUGAAGCUGCCAGCAUGAUCUAAACUUCCCUCUUGGUCAAGGAAAGAUCAGAUCAUGUGGUAGCUUCACCUGUUG
pyr-2607	UGAAGCUGCCAGCAUGAUCUA	gma-MIR167d	-51.80	0.85	DangsuA,DangsuB	AAGGGUCACAAGGGAAAAAGUGAAGCUGCCAGCAUGAUCUAGCUUUGGUUAGUGGGAGCCAGAGAGUGCUAACCCUCACUAGGUCAUGCUGUGCUAGCCUCACUCCUUCCUAUUUGGAGAC
pyr-2607	UGAAGCUGCCAGCAUGAUCUA	gma-MIR167a	-52.10	0.90	DangsuA,DangsuB	GAAGUUCGCAAAGGAAAAAGUGAAGCUGCCAGCAUGAUCUACCUUUGGUUAGAGAGCUCAAGAGUGCUAACCCUGACUAGGUCAUGCUGUGACAGCCUCACUCCUUCCUAUUUGGGGAC
pyr-2607	UGAAGCUGCCAGCAUGAUCUA	sbi-MIR167b	-88.90	0.85	DangsuA,DangsuB	UGAAGCUGCCAGCAUGAUCUAACAACGGCAUUGCUCCUCCGUGUAGCGCCCUGUGCUUGCUUUUGCUUGUCUCCAUGGAGAAGACAGCGGCAAAGCUUAGCUUUGCUUCGCUUAGCUUGCUGGCUUUUCGUAUGGGCUGGCGGCGGGUUGCUGCGUGAAGCUUGCAAGUGAUGGUUAGAUCAUGCUGUGACAGUUUCA
pyr-2607	UGAAGCUGCCAGCAUGAUCUA	gma-MIR167b	-52.50	0.88	DangsuA,DangsuB	AAGGGUCACAAAGGAAAAAGUGAAGCUGCCAGCAUGAUCUAGCUUUGGUUAGUGGGAGCGAGAGAGUGCUAACCCUCACUAGGUCAUGCUGUGCUAGCCUCACUCCUUCCUAUUUGGAGAC
pyr-2607	UGAAGCUGCCAGCAUGAUCUA	mes-MIR167b	-44.30	1.05	DangsuA,DangsuB	CCACUAGCAGUUGAAGCUGCCAGCAUGAUCUAAACUUCCUUUUCUUUAUAAUCUGCAUCAAAAGGAAAGAUCAGAUCAUGUGGUAGCUUCACCUGUUGAUGG
pyr-2607	UGAAGCUGCCAGCAUGAUCUA	osa-MIR167c	-79.80	0.94	DangsuA,DangsuB	UGUCCAAGGGAACGAGUGAAGCUGCCAGCAUGAUCUAGCUCUGAAUGAUCAACAAGAUGUGCUCCCACACUGCCUUCCUGUGGAUCUUGAGCUGUUGCUAGUCUUGUGGUCAUGCCUUGCUAGGUCAUGCUGCGGCAGCCUCACUUCUUCCCAUUGUUGGGCA
pyr-2607	UGAAGCUGCCAGCAUGAUCUA	aly-MIR167a	-59.30	0.97	DangsuA,DangsuB	GGUGCACCGGCAUCUGAUGAAGCUGCCAGCAUGAUCUAAUUAGCUUUCUUUAUAUCUGUUGUUGUGUUUCAUAACGAUGGUUAAGAGAUGAGUCUCGAUUAGAUCAUGUUCGCAGUUUCACCCGUUGACUGUCGCACC
pyr-2607	UGAAGCUGCCAGCAUGAUCUA	aly-MIR167b	-58.20	0.69	DangsuA,DangsuB	AUCUGCACAACUUGUUGCUCAGGUAUUUUGAAGACAAGUCCACAAGGGAACAAGUGAAGCUGCCAGCAUGAUCUAUCUUUGGUUAAGAGAUGAAUGUGUAAACAUAUUGCUUAAACCCAAGCUAGGUCAUGCUCUGACAGCCUCACUCCUUCCUGGUUUAGGACCAUUCACUGAUAAAGCAUUCCACAUGCCGAU
pyr-2607	UGAAGCUGCCAGCAUGAUCUA	ptc-MIR167c	-42.50	1.15	DangsuA,DangsuB	CACUAGCAGUUGAAGCUGCCAGCAUGAUCUAAAUUAACCUCCUUCUUUAUCAAGGAUGGAUUAGAUCAUGUGGUAGUUUCACCUGCUGA
pyr-2607	UGAAGCUGCCAGCAUGAUCUA	ptc-MIR167b	-44.40	0.99	DangsuA,DangsuB	AGGGAAAAAGUGAAGCUGCCAGCAUGAUCUAUCUUUGGUUAGAGAAAGAAAGGACUAACCCUAGCUAGGUCAUGCUGUGACAGCCUCACUCCUUCC
pyr-2607	UGAAGCUGCCAGCAUGAUCUA	ptc-MIR167a	-39.90	1.05	DangsuA,DangsuB	CACUAGCAGUUGAAGCUGCCAGCAUGAUCUAACUUCCUUGCUUCUUUAUCAAGGAUGGAUUUAGAUCAUGUGGUGGUUUCACCUGUUGA
pyr-2607	UGAAGCUGCCAGCAUGAUCUA	sly-MIR167a	-46.30	0.93	DangsuA,DangsuB	UCGUGCAGCACUAGCAGUUGAAGCUGCCAGCAUGAUCUAAACUUUCCUUUUAGUUCAAAUAUAAUUCGAGGAAAGAUCAGAUCAUGUGGCAGCCUUACCUGUCAAUGCCAUCACGA
pyr-2607	UGAAGCUGCCAGCAUGAUCUA	vvi-MIR167b	-47.80	1.04	DangsuA,DangsuB	CAAUAGCAGUUGAAGCUGCCAGCAUGAUCUAAGCUUUUCUGUUGCCCACCCUUUCUCCAGGAAAGACUAGAUCAUGUGGCAGUUUCACCUGUUGAUGGA
pyr-2607	UGAAGCUGCCAGCAUGAUCUA	lus-MIR167e	-53.90	0.74	DangsuA,DangsuB	UGAGUACUUCUCCAUCUAUGGUCCGUGGAGCAGCAGCAGUUGAAGCUGCCAGCAUGAUCUAAACUUCCUUUGAAAGGAAAAAGAGGAAGAAGGAAGAUCUGAGAUCAUAUGACAGUUUCACCUGUUGAUGUCCUUCACGAUCGAUCGAUCGACACCACUCA
pyr-2607	UGAAGCUGCCAGCAUGAUCUA	ptc-MIR167d	-38.80	0.78	DangsuA,DangsuB	AGGGAAAAGGUGAAGCUGCCAGCAUGAUCUAUCUUUGGUUAGAGAAGGAUAGAAGCGAAAGAACUAACCCUAGCUAGGUCAUGCUCUGACAGCCUCACUCCUUCC
pyr-2607	UGAAGCUGCCAGCAUGAUCUA	ata-MIR167e	-68.80	1.06	DangsuA,DangsuB	AGGGAACGAGUGAAGCUGCCAGCAUGAUCUAGCUCCGAGUGAUCAAACAAGAAAAGCUUGUUGAUUCAAGCUCUUGUGGUCAUGCCUUGCUAGGUCAUGCUGCGGCAGCCUCACUUCUUCCCGCC
pyr-2607	UGAAGCUGCCAGCAUGAUCUA	lus-MIR167c	-63.40	1.09	DangsuA,DangsuB	AAGUCCACAAAGGGAAAGAGUGAAGCUGCCAGCAUGAUCUACCUUUGGGCUAGUUAAUUUUGUAGCGGUUAACCCAAGCUAGGUCAUGCUGUGACAGCCUCAUUCUUUCCCCACUUUUGUGGAUCUU
pyr-2607	UGAAGCUGCCAGCAUGAUCUA	lus-MIR167d	-65.90	0.93	DangsuA,DangsuB	CGUGGAGCACCAGCAGUUGAAGCUGCCAGCAUGAUCUAACCUUCCUUUGCAUAUAUAUGUACAUGUGCAUGAUCGAUCAUCAAAGUAGGUAAGAGGAGGAUCGAUAAGGAAGGUCUGAGAUCAUGUGACAGUUUCACCUGUUGAUGCCCUUCACG
pyr-2607	UGAAGCUGCCAGCAUGAUCUA	ata-MIR167a	-47.60	0.93	DangsuA,DangsuB	AGAGAAAGCGUGAAGCUGCCAGCAUGAUCUAACUCUUGAACCAGCUAGCUUCCGCGGGGUGGUUAGAUCGUGCUGUGACAGUUUCACCCUUUCCCUGU
pyr-2607	UGAAGCUGCCAGCAUGAUCUA	ata-MIR167c	-39.90	0.91	DangsuA,DangsuB	UGUGAAUGAGUGAAGCUGCCAGCAUGAUCUACCUUUGAUUCGCUUCUGCGUGUGAAUCCUUGUUAGAUCAUGACUGACAGCCUCAUUUCUUCCCAG
pyr-2607	UGAAGCUGCCAGCAUGAUCUA	lus-MIR167h	-70.80	1.06	DangsuA,DangsuB	UUGUCCACAAGGGAAGCAGUGAAGCUGCCAGCAUGAUCUAGCUUUGGCUAGUUUGCAACGAAAGUAAAAUGAGAUAGUAGUAGUGAGCUAGCCCUAGCUAGGUCAUGCUAUGACAGCCUCAUUCCUUCCCAAUGUGGGGGA
pyr-2607	UGAAGCUGCCAGCAUGAUCUA	rco-MIR167a	-50.40	0.87	DangsuA,DangsuB	AAAGGUGAAGCUGCCAGCAUGAUCUAGCUUUGGUUAGUGAGACAGCUGAAAGAAAGAUACAGAUAACACAUGGUAUCUAAGCAAUAGUGCUAACCCUAGCUAGGUCAUGCUCUGACAGCCUCACUCCUUC
pyr-2607	UGAAGCUGCCAGCAUGAUCUA	rco-MIR167b	-37.50	0.96	DangsuA,DangsuB	UCAGUUGAAGCUGCCAGCAUGAUCUAAAUCUUCCUCCCUCGUUGAGGAGAGAUCAGAUCAUGUGGCAGUUUCACCCGUUG
pyr-2607	UGAAGCUGCCAGCAUGAUCUA	vvi-MIR167e	-35.30	0.88	DangsuA,DangsuB	CACUAUCAGUUGAAGCUGCCAGCAUGAUCUAAACUUGCUUCCCUUUGUGAACAGAGAUCAGAUCAUGUGGCAGUUUCACCUGUUGUUGGU
pyr-2607	UGAAGCUGCCAGCAUGAUCUA	tae-MIR167a	-43.80	0.73	DangsuA,DangsuB	CUGCCCAAGGGAACGAGUGAAGCUGCCAGCAUGAUCUAGCUCCGAGUGAUCAAACAAGAAACGCUGCGGCAGCCUCACUUCUUCCCGCCGUUGGGCACAACUACUUCU
pyr-2607	UGAAGCUGCCAGCAUGAUCUA	stu-MIR167b	-33.00	1.00	DangsuA,DangsuB	UGAAGCUGCCAGCAUGAUCUAAACUUUUCUAUUGCUCUGUACGAGGAAAGAUCAGAUCAUGUGGCAGCAUCACC
pyr-2607	UGAAGCUGCCAGCAUGAUCUA	stu-MIR167c	-37.90	0.97	DangsuA,DangsuB	UGAAGCUGCCAGCAUGAUCUAAACUUGGCCACACUUAUAAAGAAAAAAAAUGGGUGACUAAGGUUAGGUCAUGCUCGGACAGCCUCACU
pyr-2607	UGAAGCUGCCAGCAUGAUCUA	zma-MIR167c	-80.60	1.09	DangsuA,DangsuB	UGCCCAAGGGAACGAGUGAAGCUGCCAGCAUGAUCUAGCUCGGAGUGAUCACGCGAGGAGAACAAUAGCUCGAGGUGGUCAUGCCUUGCUAGAUCAUGCUGUGGCAGCCUCACUUCUUCCCGUCCUUGGGCA
pyr-2607	UGAAGCUGCCAGCAUGAUCUA	stu-MIR167a	-31.60	0.93	DangsuA,DangsuB	UGAAGCUGCCAGCAUGAUCUAAACUUCCCUUUUUAGUUCAAAUAUGAUAUGAGGAAAGAUCAGAUCAUGUGGCAGCCUCACC
pyr-2607	UGAAGCUGCCAGCAUGAUCUA	dpr-MIR167b	-54.40	1.05	DangsuA,DangsuB	UCUAGAAAGGAACAAGUGAAGCUGCCAGCAUGAUCUAUCUUGGGAUGGUUUUGGAUAUGAGAGUACUAACCCUAGCUAGGUCAUGCUGUAGCAGCAUCACUUCUUCCUCUUUGGG
pyr-2607	UGAAGCUGCCAGCAUGAUCUA	stu-MIR167d	-29.40	0.98	DangsuA,DangsuB	UGAAGCUGCCAGCAUGAUCUAAACUUACCUACAAAUUUAUAUUGAGGCAAGAUCAGAUCAUGUGGUUGCUUCACC
pyr-2607	UGAAGCUGCCAGCAUGAUCUA	dpr-MIR167a	-43.90	1.13	DangsuA,DangsuB	UAGCCUCUGUUGAAGCUGCCAGCAUGAUCUAAACUUUCCUUUUUUUGUAGAGGAAAGAACAGAUCAUGUGGUAGCUUCAUCCGAUUCUGGUUG
pyr-2607	UGAAGCUGCCAGCAUGAUCUA	ppe-MIR167a	-55.10	0.97	DangsuA,DangsuB	GUCACAAGGGAAAAAGUGAAGCUGCCAGCAUGAUCUAGCUUUGGUUACAGAUAUCAUACAUAUAUCUAUAUAGAUAGUUCAUUAGUAACCCUAGCUAGGUCAUGCUCUGACAGCCUCACUCCUUCCCAUUUGGGAC
pyr-2607	UGAAGCUGCCAGCAUGAUCUA	ppe-MIR167b	-54.70	0.84	DangsuA,DangsuB	GGUUUUGCUUGCUUCUCGUGGACCACCAGCAGUUGAAGCUGCCAGCAUGAUCUAAACUUCCCUUUUGGCCAGUUGAGGAAAGAUCAGAUCAUGUGGUAGCUUCACCUGUUGACGGGAUCACGAAAACGAACUUUACU
pyr-2607	UGAAGCUGCCAGCAUGAUCUA	cme-MIR167a	-52.80	0.79	DangsuA,DangsuB	AGGAAAAGGUGAAGCUGCCAGCAUGAUCUACCUCUGGUCUGCUAGCUUGAAAAGACAAAAGCGUAAAGAUAAAGAGAUUGAUUCAUACCAAUUUCUUUUUUCUUGAUCCUCCAUUGCUAACCCUAGUUAGGUCAUGCUCUGACAGCCUCACUCCUUCCUA
pyr-2607	UGAAGCUGCCAGCAUGAUCUA	cme-MIR167b	-34.00	0.79	DangsuA,DangsuB	CACCAGCAGUUGAAGCUGCCAGCAUGAUCUAAACUUCUUCUUGCUCUUCACUCAAGCCAAGGAAAGAUCAGAUCAUAUGGUAGCUUCACCUUUUGAUG
pyr-119	CUCUCCCUCAAGGGCUUCUG	nta-MIR477a	-45.20	1.00	DangsuA,DangsuB	GUCUUUGUUCACUCUCCCUCAAGGGCUUCUGGCUUAAAAUGCCUUACUCUUUGGUUUGUGUUAGUGCCAGAGGUCUUUCGAGUGAGAGUGGAUAAAUUCUG
pyr-119	CUCUCCCUCAAGGGCUUCUG	atr-MIR477	-73.50	0.88	DangsuA,DangsuB	CUAGAUCUAUGCAGAUGGGAGUAGAGGACCAAGAAAAAUUUCAGGGCACCUAAUCUUCACUCUCCCUCAAGGGCUUCUGGUCCUUACCAUUCAUGGUAAGAGGAAUAGAGGCCUUAGGGGAGAGUGGAUGCUAGGUGUUUUGGUUUCUAUCAAUCGGUUAUACUUCCUAGCCUUGGCCUUAG
pyr-119	CUCUCCCUCAAGGGCUUCUG	mes-MIR477e	-57.70	1.20	DangsuA,DangsuB	AUGGCAUUCAUUACUCACUCUCCCUCAAGGGCUUCUGCGUGUUUCUGGUCGAAAGACCAAAUACUUACGCAGAAGACCUUAGGGAGAGUGGAUAAUACUUGCCAU
pyr-119	CUCUCCCUCAAGGGCUUCUG	mes-MIR477c	-63.30	0.83	DangsuA,DangsuB	GGAAUUCUCGUCAACGACAACAACAAUGGCAUAUCCAUUAUUCACUCUCCCUCAAGGGCUUCUGUUGGUUUUCUGGUCGACCGAAUGACCAAGUACCUACACGGAAGACCUUAGGGAGAGUGGAAAAUACUUGCCAUUUGAUUUCAUGGAAUUAUUGCUCUACUCCGAGAAUUUC
pyr-119	CUCUCCCUCAAGGGCUUCUG	mes-MIR477b	-70.00	0.90	DangsuA,DangsuB	CAAGCCAUUGGUUGCUCACUCUCCCUCAAGGGCUUCUGCAUGUAUGCUCUAGCUAGCUCAUGCAUCCACAAAUGCCAACAAAAUAGCAUCAGUCAGCUGGGGUUAGUAGGCUAGAAGCUCUUGCAGGGGGGCUGAACAAGCCGUGGCUUG
pyr-119	CUCUCCCUCAAGGGCUUCUG	mes-MIR477a	-27.60	0.81	DangsuA,DangsuB	AUUACUCACUCUCCCUCAAGGGCUUCUGUGAGUUUCUGGUUGAAAUACCAUACGGAGGACUUUAGAGAGAGUGGAUAAU
pyr-117	CUCUCCCUCAAGGGCUUCUA	aqc-MIR477e	-36.40	1.14	DangsuA,DangsuB	UUGAUCACUCUCCCUCAAGGGCUUCUAUUAGUCAUGUAGAGAAUUCUUAUGUAACUAGAAGAACUUGAGGGAGAAUGAACAAAC
pyr-117	CUCUCCCUCAAGGGCUUCUA	aqc-MIR477b	-28.00	0.93	DangsuA,DangsuB	ACUCUCCCUCAAGGGCUUCUAACAGUCAUUUAGAAAAUGCAGAUGUAAUUAGAAGCACUUGCAGGGGAGUAU
pyr-117	CUCUCCCUCAAGGGCUUCUA	aqc-MIR477a	-38.30	0.96	DangsuA,DangsuB	CUCUCCCUCAAGGGCUUCUACCUUUGCCCAUUUAUUAAGGUCUAAUGGGGGGUGAAGCUCUUCAGGGGGGGGG
pyr-1639	AUUGAGUGCAGCGUUGAUGU	nta-MIR397	-47.80	1.04	DangsuA,DangsuB	UAGAAACAUCAUUGAGUGCAGCGUUGAUGUCAAUUUCUGUGAAGUCUUUAAUUUGGCAUUUGGUCUUUUUGCCACUUUUUCCAAUUCGUUGUCAUCUGCGCUGCACUCAAUCAUGUUUUUAG
pyr-1639	AUUGAGUGCAGCGUUGAUGU	aly-MIR397a	-55.10	1.31	DangsuA,DangsuB	UCCUGGAUUUGAAUGAACAUCAUUGAGUGCAGCGUUGAUGUAAUUUCCUUUUUUUUUCAUUGUUGAAUGGAAUUAAAAGAAUUUACACCGGCGUUGCGCUCAAUUAUGUUUUUCUUAUUUUCAGGA
pyr-1639	AUUGAGUGCAGCGUUGAUGU	ath-MIR397a	-41.80	1.23	DangsuA,DangsuB	UGAAUGAACAUCAUUGAGUGCAGCGUUGAUGUAAUUUCGUUUUGUUUUUCAUUGUUGAAUGGAUUAAAAGAAUUUAUACCAGCGUUGCGCUCAAUUAUGUUUUUCUA
pyr-1639	AUUGAGUGCAGCGUUGAUGU	aly-MIR397b	-49.10	1.23	DangsuA,DangsuB	CCUGGGUUUGAAUAAACAUCAUUGAGUGCAGCGUUGAUGUAAGUUUACUUAUUUUAUUCCAUUGUUGAAUGAAUUAAAAUGAUACAGAAUACAUCAGCGUUGCAUUCAAUUAUGUUUUUCUAAUUUUCAGG
pyr-1639	AUUGAGUGCAGCGUUGAUGU	bna-MIR397a	-37.20	1.16	DangsuA,DangsuB	GAACAUCAUUGAGUGCAGCGUUGAUGUGAUUUACUUCUCUUUUUCAUUGUUGAAUGGAUUAAAGCAAUUUACAUCAACGUUGGCUCAAUUAUGUUU
pyr-1639	AUUGAGUGCAGCGUUGAUGU	bna-MIR397b	-38.20	1.23	DangsuA,DangsuB	GAACAUCAUUGAGUGCAGCGUUGAUGUGAUUUACUUAUCUUUUUCAUUGUUGAAUGGAUUAAAGCAAUUUACAUCAACGUUGGCUCAAUUAUGUUU
pyr-1639	AUUGAGUGCAGCGUUGAUGU	cme-MIR397	-33.60	0.93	DangsuA,DangsuB	GAAAGAUACGUCAUUGAGUGCAGCGUUGAUGUCGAAACUUAUUUCAAAGUUCUAACUUUUCUCAUCAGCGCUUCAUUCAAUCACGUUUCUUCC
pyr-337	UCAGGAGAGAUGACACCGACG	sbi-MIR1432	-98.50	0.91	DangsuA,DangsuB	GAUAGGACAUAGGAGGCGAGAGGGACGACGAGCCGUUGGUUUGUGGGUGUGCGUCCUAUGCUCAGGAGAGAUGACACCGACGUCGGACGGACCGGUCGAUCCGCGCCGUGUCUGUCCGUCCGAAGUGGGUGUCAUCUCGCCUGAAGCAUAGGACUUACCAGCCCAGUACAUCUCCCUGUUUUCA
pyr-337	UCAGGAGAGAUGACACCGACG	zma-MIR1432	-56.00	1.00	DangsuA,DangsuB	GCUCAGGAGAGAUGACACCGACGCCAGACGGACCGGUCCAUCCGCGCCGUGUCUGUCCGUCUGAAGUGGGUGUCAUCUCGCCUGAAGCA
pyr-337	UCAGGAGAGAUGACACCGACG	ata-MIR1432	-70.20	1.10	DangsuA,DangsuB	GGUCCUGUGAUCAGGAGAGAUGACACCGACGCCGAUCAGAUGGGUCGGCUUAACCAGGCCAUGCAUCCGUCUGUUCGGAGUUGGUGUCACCUCGCCUGAACAUAGGGCUC
pyr-333	CUCUCCCUCAAGGGCUUCUCU	csi-MIR477b	-61.90	0.94	DangsuA,DangsuB	CAAAAGCAAUCGUCGUUCACUCUCCCUCAAGGGCUUCUCUUCGAUCCAUAUAUAACGUACAUAUGCUCAAAUGAGUGGUGAUGGAUCGACGCUGAAGCCCUUAGGGCAGAGUGAUCGACUCCGGCUUUCUCAUUUUCC
pyr-333	CUCUCCCUCAAGGGCUUCUCU	stu-MIR477a	-35.80	0.99	DangsuA,DangsuB	CCUCUCCCUCAAGGGCUUCUCUCCUGCAUGCUUAUAUGUUGGGAAAGAAGCUCUAGCAGGGAGAGCCA
pyr-333	CUCUCCCUCAAGGGCUUCUCU	nta-MIR477b	-49.30	0.93	DangsuA,DangsuB	CACUGCUUGUUGUCUCUCCCUCAAGGGCUUCUCUUCUGCUUGUUCAUAAGAUUUAUAAGCUUUUAAUUAAGAUGCUAAACUUAAAGCAUACUGGGAAUAGGAGCUCUUGCAGGUUGAGACAACAAGAAAUGCC
pyr-1382	UUGAGCCGUGCCAAUAUCACA	ppe-MIR171g	-46.70	1.20	DangsuA,DangsuB	AAAAAUGUGGGAUGUUGGAAUGGCUCAAUCAAAUCAAAUCUCCCAAGUAUUGGGUCCUUUGAUUUGAUUGAGCCGUGCCAAUAUCACAGUUGCCU
pyr-1381	UUGAGCCGUGCCAAUAUCACG	bna-MIR171b	-43.70	0.95	DangsuA,DangsuB	GGUAACGCGAGAUAUUAGUGCGGUUCAAUCAAAUAGUCGUGUUCUCACUUGAUAGAGAUCGGUUUUGUUCGAUUGAGCCGUGCCAAUAUCACGCGUCAACC
pyr-1381	UUGAGCCGUGCCAAUAUCACG	bna-MIR171c	-36.60	0.96	DangsuA,DangsuB	GCGAGAUAUUAGUGCGGUUCAAUCAAAUAGUCGUACUCUUAGCUAUUAGAGAUCGGUUUUGUUCGAUUGAGCCGUGCCAAUAUCACGC
pyr-1381	UUGAGCCGUGCCAAUAUCACG	bna-MIR171a	-39.00	0.95	DangsuA,DangsuB	UGGUCAAGCGAGAUAUUAGUGCGGUUCAAUCAAAUAGUCUCACUCUUAGUUGAUAGAGAUUGAUUUUGUUCGAUUGAGCCGUGCCAAUAUCACGCAUAUAACCA
pyr-1381	UUGAGCCGUGCCAAUAUCACG	bna-MIR171d	-42.80	1.04	DangsuA,DangsuB	ACAAUGCGAGAUAUUGGUGCGGUUCAAUCAGAAAUCCACACUCUUUUGUUGUAGAGAUCGGUUUGUUUGAUUGAGCCGUGCCAAUAUCACGAGUGU
pyr-1381	UUGAGCCGUGCCAAUAUCACG	bna-MIR171e	-41.20	1.08	DangsuA,DangsuB	CAAUACGAGAUAUUGGUGUGGUUCAAUCAGAAAACCACACUCUUUUGUUGUAGAGAUCGGUUUGUUUGAUUGAGCCGUGCCAAUAUCACGAG
pyr-1381	UUGAGCCGUGCCAAUAUCACG	nta-MIR171a	-46.40	1.19	DangsuA,DangsuB	AUACACGAGAUAUUGGUGCGGUUCAAUGAGAAAGCAGUACUCGACAAAUUUUGACUCUACUUUUUGAUUGAGCCGUGCCAAUAUCACGUGUAGCA
pyr-1381	UUGAGCCGUGCCAAUAUCACG	bra-MIR171d	-43.70	0.95	DangsuA,DangsuB	GGUAACGCGAGAUAUUAGUGCGGUUCAAUCAAAUAGUCGUGUUCUCACUUGAUAGAGAUCGGUUUUGUUCGAUUGAGCCGUGCCAAUAUCACGCGUCAACC
pyr-1381	UUGAGCCGUGCCAAUAUCACG	bra-MIR171b	-39.00	0.95	DangsuA,DangsuB	UGGUCAAGCGAGAUAUUAGUGCGGUUCAAUCAAAUAGUCUCACUCUUAGUUGAUAGAGAUUGAUUUUGUUCGAUUGAGCCGUGCCAAUAUCACGCAUAUAACCA
pyr-1381	UUGAGCCGUGCCAAUAUCACG	bra-MIR171c	-36.60	0.96	DangsuA,DangsuB	GCGAGAUAUUAGUGCGGUUCAAUCAAAUAGUCGUACUCUUAGCUAUUAGAGAUCGGUUUUGUUCGAUUGAGCCGUGCCAAUAUCACGC
pyr-1381	UUGAGCCGUGCCAAUAUCACG	bra-MIR171a	-39.70	1.10	DangsuA,DangsuB	CGAGAUAUUGGUGUGGUUCAAUCAGAAAACCACACUCUUUUGUUGUAGAGAUCGGUUUGUUUGAUUGAGCCGUGCCAAUAUCACG
pyr-1381	UUGAGCCGUGCCAAUAUCACG	sbi-MIR171b	-76.00	0.93	DangsuA,DangsuB	AUGGCCGCCGCGCGCGACGGGGUAUUGGCGCGGUUCAAUUCGAGAGCUCGAGCCCUAGACUAGACGCCAGGGAGAGAGGGGGCUCUGCUCUCUGAUUGAGCCGUGCCAAUAUCACGUCCCGCUUGAAUGGCU
pyr-1381	UUGAGCCGUGCCAAUAUCACG	lus-MIR171i	-53.60	0.96	DangsuA,DangsuB	GAGGGGAGUCGAAAUUAACGAGAUAUUGGUCCGGUUCAAUAUGAAAACAAUGUUCAGAAUCUGGAGUUGAGCACUGUUUUUUCAUUGAGCCGUGCCAAUAUCACGUGUCGUUCCUUCCUCCUCCUC
pyr-1381	UUGAGCCGUGCCAAUAUCACG	hpa-MIR171a	-48.10	0.94	DangsuA,DangsuB	UGAGGGGGAGCUGUUGAACGAGAUGUUGGUUCGGUUCAAUAAGAACUCAACGUUCAAAUAGUGCAUUGAACGUUGCUUUUUGAUUGAGCCGUGCCAAUAUCACGUGCAUGUUGCU
pyr-1381	UUGAGCCGUGCCAAUAUCACG	sbi-MIR171k	-48.20	1.00	DangsuA,DangsuB	CGGGAUAUUGGCGCGGUUCAAUCAGAAAGCUUGCGCUCCAAAGCCCAGGGGCUCCACUCUUUGAUUGAGCCGUGCCAAUAUCACGUC
pyr-1381	UUGAGCCGUGCCAAUAUCACG	mes-MIR171b	-54.30	1.47	DangsuA,DangsuB	AAUACGAGAUAUUGGUGCGGUUCAAUCUGAUAGCAGUGCUCUAUGCAUAGAGCUUUGUUGUUUGAUUGAGCCGUGCCAAUAUCACGUAUU
pyr-1381	UUGAGCCGUGCCAAUAUCACG	mtr-MIR171f	-47.70	1.29	DangsuA,DangsuB	GAUGAGAUAUUGGUGCGGUUCAAUCAGAAGGCAGUGCUUUUAUAAUUCAAAAAGCUCUGUGUUAUUUGAUUGAGCCGUGCCAAUAUCACGUGUUA
pyr-1381	UUGAGCCGUGCCAAUAUCACG	mes-MIR171c	-53.00	1.43	DangsuA,DangsuB	ACGAGAUAUUGGUGCGGUUCAAUCAGAGAGCAGUGCUCUAUGAAUAGAGCUUUGUUGUUUGAUUGAGCCGUGCCAAUAUCACGU
pyr-1381	UUGAGCCGUGCCAAUAUCACG	ptc-MIR171a	-48.50	1.18	DangsuA,DangsuB	UCAGAGAAAACGGGAUAUUGGUACGGUUCAAUCAGAAAGUAAUGCUCCCAAAAGUAUAGAGUACUAUUGUUUGAUUGAGCCGUGCCAAUAUCACGUACACUCAU
pyr-1381	UUGAGCCGUGCCAAUAUCACG	rco-MIR171b	-52.00	1.41	DangsuA,DangsuB	GUACGAGAUAUUGGUGCGGUUCAAUCAGAGAUCAUUGCUCUAUAUAUAGAGCUUUUGUUGUUUGAUUGAGCCGUGCCAAUAUCACGUGCAU
pyr-1381	UUGAGCCGUGCCAAUAUCACG	rco-MIR171a	-41.30	1.01	DangsuA,DangsuB	AAACGGGAUAUUGGUCCGGUUCAAUAAGAAAACAGUGCUCAAAAUGUUAUGGGCCCUGCUUUUUGAUUGAGCCGUGCCAAUAUCACGUGCAC
pyr-1381	UUGAGCCGUGCCAAUAUCACG	tae-MIR171b	-60.10	0.77	DangsuA,DangsuB	UGAGUUAAUCCUGCGAGGGGAGUGAACGCGGUAUUGGUGCGGUUCAAUCAGAGAGCUGGCGCCCCAGGAGGCAAGGGGUUCCUCCCUUCGAUUGAGCCGUGCCAAUAUCACGCGGUUUCUCAUGAAUCGCAUCCUCCU
pyr-1381	UUGAGCCGUGCCAAUAUCACG	mdm-MIR171f	-44.50	0.97	DangsuA,DangsuB	CAGUUUGAACGGGAUAUUGGUCCGGUUCAAUAAGAAAACAGUGCUCUAAAAGUGCUUGAGCUCUGCUUUUUGAUUGAGCCGUGCCAAUAUCACGUGCCACUG
pyr-1381	UUGAGCCGUGCCAAUAUCACG	gma-MIR171a	-41.60	0.95	DangsuA,DangsuB	GUUCAACGGGAUAUUGGUCCGGUUCAAUAAGAAAGCAAUGCUCAAAAUGUUUUUGGGUCCUGUUUUUUCAUUGAGCCGUGCCAAUAUCACGAACCACUGCUC
pyr-1381	UUGAGCCGUGCCAAUAUCACG	ppe-MIR171a	-57.00	1.12	DangsuA,DangsuB	AAUGGAUCGGUUUAACGGGAUAUUGGUCCGGUUCAAUAAGAAAGCAGUGCUCUAAGUGCUUGAGCUCUGCUUUUUGAUUGAGCCGUGCCAAUAUCACGUGCCACUGUUCCUUUAU
pyr-1381	UUGAGCCGUGCCAAUAUCACG	gma-MIR171i	-53.40	0.81	DangsuA,DangsuB	UUAAAGGCAAGCUUGGUGGAAAUGAGAGGUAGAGGGGACCGGUUCAACGGGAUAUUGGUCCGGUUCAAUAAGAAAGCAAUGCUCAAAAUGUUAUUGGGUCCUGUUUUUUCAUUGAGCCGUGCCAAUAUCACGAAACACUUCUCUUCAUACC
pyr-1381	UUGAGCCGUGCCAAUAUCACG	aqc-MIR171f	-40.40	1.26	DangsuA,DangsuB	ACGAGAUAUUAGUGCGGUUCAAUUAGAAAACAGUUGCUCAUAAGUUUUGAGCUUUGUUAUUUAAUUGAGCCGUGCCAAUAUCACGUUG
pyr-1381	UUGAGCCGUGCCAAUAUCACG	vvi-MIR171d	-37.90	1.00	DangsuA,DangsuB	UAGAUACACGAGAUAUUGAUACGGUUCAAUUAGAAAGCUGUGUUCUAAGUUAAGAACUCUGUUGUUUGAUUGAGCCGUGCCAAUAUCACGUCCUACUUCU
pyr-1381	UUGAGCCGUGCCAAUAUCACG	aly-MIR171c	-50.40	1.23	DangsuA,DangsuB	GGACAUCGAAUACGAGAUAUUGGUGCGGUUCAAUCAGAAAACUGUACUCUUUUGUUUUAAAGAUCGGUUUGUUUGAUUGAGCCGUGCCAAUAUCACGUGUUUAAAUAGUUU
pyr-1381	UUGAGCCGUGCCAAUAUCACG	aly-MIR171b	-47.80	0.81	DangsuA,DangsuB	GAGUGAUUUUAUGUAAGGUAACGCGAGAUAUUAGUGCGGUUCAAUCAAAUAGUCGUCCUCUUAACUCAUGGAGAUCGGUGUUGUUCGAUUGAGCCGUGCCAAUAUCACGCGGUAAACCAAAAUGGCAAAGAUCGAUC
pyr-1381	UUGAGCCGUGCCAAUAUCACG	ptc-MIR171b	-53.20	1.40	DangsuA,DangsuB	UUAUAUAUAACGAGAUAUUGGUGCGGUUCAAUCAGAUAGUAAUGCUCCAUAAGCAUAGAGCUCUAUUGUUUGAUUGAGCCGUGCCAAUAUCACGUAUAUGUUG
pyr-1381	UUGAGCCGUGCCAAUAUCACG	osa-MIR171b	-54.60	1.01	DangsuA,DangsuB	GCGACGACGGGAUAUUGGGGCGGUUCAAUCAGAAAGCUUGUGCUCCGGAAGCGAGGAGCUCUACUCUUUUGAUUGAGCCGUGCCAAUAUCACGUCGCAUC
pyr-1381	UUGAGCCGUGCCAAUAUCACG	osa-MIR171c	-51.60	0.96	DangsuA,DangsuB	GUGGGAACGGGAUAUUGGUGCGGUUCAAUCAGAAAGCUUGUGCUCCGAAGGCGAGGGGCUCCACUCUUUGAUUGAGCCGUGCCAAUAUCACGUCGCCUU
pyr-1381	UUGAGCCGUGCCAAUAUCACG	vvi-MIR171j	-37.90	1.00	DangsuA,DangsuB	UAGAUACACGAGAUAUUGAUACGGUUCAAUUAGAAAGCUGUGUUCUAAGUUAAGAACUCUGUUGUUUGAUUGAGCCGUGCCAAUAUCACGUCCUACUUCU
pyr-1381	UUGAGCCGUGCCAAUAUCACG	stu-MIR171d	-36.40	1.26	DangsuA,DangsuB	AGAUAUUGGUGCGGUUCAAUUAGAAAGCACACUUCUUUAUAUAUAGAACUUCGUUAUUUAAUUGAGCCGUGCCAAUAUCACG
pyr-1381	UUGAGCCGUGCCAAUAUCACG	bol-MIR171a	-42.80	1.04	DangsuA,DangsuB	ACAAUGCGAGAUAUUGGUGCGGUUCAAUCAGAAAUCCACACUCUUUUGUUGUAGAGAUCGGUUUGUUUGAUUGAGCCGUGCCAAUAUCACGAGUGU
pyr-1381	UUGAGCCGUGCCAAUAUCACG	ata-MIR171c	-53.40	0.86	DangsuA,DangsuB	AGGGGAGUGAACGCGGUAUUGGUGCGGUUCAAUCAGAGAGCUGGUGCCCCAGGAGGCAAGGGGUUCCUCCCUUCGAUUGAGCCGUGCCAAUAUCACGCGGUUUCUC
pyr-1381	UUGAGCCGUGCCAAUAUCACG	tcc-MIR171d	-51.70	0.99	DangsuA,DangsuB	ACACAGGAGUUUGCCAUCGAGAUAUUGGUGCGGUUCAAUCGGAGAGCAUCACUCUAAAGGGUAGAGUUCUGUUAUUUGAUUGAGCCGUGCCAAUAUCACGUACAACUGCUCAUGAUU
pyr-1381	UUGAGCCGUGCCAAUAUCACG	tcc-MIR171f	-43.00	0.98	DangsuA,DangsuB	GCACAAAGAGAAAACGGGGAUGUUGGAAUGGCUCAAUCAAAUCAAAUCUCCCAAGCUUUUUAUGGGUGUUUUAAUUUGAUUGAGCCGUGCCAAUAUCACGUUAAUUACUUAUCUUCA
pyr-1381	UUGAGCCGUGCCAAUAUCACG	ath-MIR171b	-44.80	0.85	DangsuA,DangsuB	UGCAAGGUAACGCGAGAUAUUAGUGCGGUUCAAUCAAAUAGUCGUCCUCUUAACUCAUGGAGAACGGUGUUGUUCGAUUGAGCCGUGCCAAUAUCACGCGGUAAACCAAAAAUGGCA
pyr-1381	UUGAGCCGUGCCAAUAUCACG	ath-MIR171c	-51.80	1.10	DangsuA,DangsuB	UGAGCGCACUAUCGGACAUCAAAUACGAGAUAUUGGUGCGGUUCAAUCAGAAAACCGUACUCUUUUGUUUUAAAGAUCGGUUUAUUUGAUUGAGCCGUGCCAAUAUCACGCGUUUA
pyr-1381	UUGAGCCGUGCCAAUAUCACG	zma-MIR171b	-47.00	0.96	DangsuA,DangsuB	CGGGAUAUUGGCGCGGUUCAAUCAGAAAGCUUGCGCUCCAGGCCCGAGGGGCUCCACUCUUUGAUUGAGCCGUGCCAAUAUCACG
pyr-1381	UUGAGCCGUGCCAAUAUCACG	vvi-MIR171c	-46.50	1.06	DangsuA,DangsuB	UGGUAUUACGGGAUAUUGGUGCGGUUCAAUAAGAAAGCAGUGCUCGCAAUCUUUUUGAGUUCUGGUUUUUGAUUGAGCCGUGCCAAUAUCACGUGUCAUUGCU
pyr-1381	UUGAGCCGUGCCAAUAUCACG	sly-MIR171b	-41.20	1.29	DangsuA,DangsuB	ACGAGAUAUUGGUGCGGUUCAAUUAGAAAGCGCACUUCUUUAUAUAUAGAACUUCGUUAUUUAAUUGAGCCGUGCCAAUAUCACGU
pyr-1381	UUGAGCCGUGCCAAUAUCACG	ssl-MIR171a	-44.30	1.14	DangsuA,DangsuB	CGAGAUAUUGGUGCGGUUCAAUUUGAAAGCCGUGCUCAAUAGGCUUAGAGCUCGGUUAUUUGAUUGAGCCGUGCCAAUAUCACG
pyr-1381	UUGAGCCGUGCCAAUAUCACG	zma-MIR171j	-68.10	0.84	DangsuA,DangsuB	AAUGGCCGCGAGCUAGACGGGGUAUUGACGCGGUUCAAUUCGAGAGCUCGAGCCCUAGCAGAGGCCAGGGGGGGUGGGGCUCUGCUCUCUGAUUGAGCCGUGCCAAUAUCACGUCCCACUCGCCCUCGC
pyr-1381	UUGAGCCGUGCCAAUAUCACG	cme-MIR171b	-46.60	1.19	DangsuA,DangsuB	UUAACGGGAUAUUGGUGCGGUUCAAUAAAAAGGUAAUACUCAAAAUAAGCGUUGGGUUUUGCUUUUUGAUUGAGCCGUGCCAAUAUCACGUGUCAACGA
pyr-1381	UUGAGCCGUGCCAAUAUCACG	crt-MIR171	-76.80	0.88	DangsuA,DangsuB	AAUAUGACAGGAAUAUGCAGGAUGCUGGAAUCUUGUUUCCUAUCUUUUGGGGGUUAAAAUGAAGAUUGUGGUGACCAUUUUGGAGGAUGGAUGGGUACAACGGGAUAUUGGUGCGGUUCAAUAAGAAAACGGUGCUCAAUACUUUUUGAGCUCCGCUUUUUGAUUGAGCCGUGCCAAUAUCACGUGCCACUCGCUCUCUAA
pyr-1381	UUGAGCCGUGCCAAUAUCACG	cme-MIR171d	-39.40	1.01	DangsuA,DangsuB	GGAACGAGAUGUUGGUCCGGUUCAAUAAGAAAGUAGUGCUCUGUUUAACUUGGGUUCUUCUUUUUUUAUUGAGCCGUGCCAAUAUCACGUGUUGUAUU
pyr-1381	UUGAGCCGUGCCAAUAUCACG	htu-MIR171b	-48.20	0.95	DangsuA,DangsuB	UGAGAGGGAGCUGUUGAACGAGAUGUUGGUUCGGUUCAAUAAGAACUCAACGUUCAAAUGGUGCAUUGAACGUUGCUUUUUGAUUGAGCCGUGCCAAUAUCACGUGCAUGUUGCU
pyr-1381	UUGAGCCGUGCCAAUAUCACG	htu-MIR171c	-48.20	0.95	DangsuA,DangsuB	UGAGAGGGAGCUGUUGAACGAGAUGUUGGUUCGGUUCAAUAAGAACUCAACGUUCAAAUGGUGCAUUGAACGUUGCUUUUUGAUUGAGCCGUGCCAAUAUCACGUGCAUGUUGCU
pyr-1381	UUGAGCCGUGCCAAUAUCACG	htu-MIR171a	-48.20	0.95	DangsuA,DangsuB	UGAGAGGGAGCUGUUGAACGAGAUGUUGGUUCGGUUCAAUAAGAACUCAACGUUCAAAUGGUGCAUUGAACGUUGCUUUUUGAUUGAGCCGUGCCAAUAUCACGUGCAUGUUGCU
pyr-160	AUUGGAUUGAAGGGAGCUCCA	osa-MIR159c	-101.50	0.99	DangsuA,DangsuB	GAGGAGGAAGAGGAGCUCCUUUCGAUCCAAUUCAGGAGAGGAAGUGGUAGGAUGCAGCUGCCGAUUCAUGGAUACCUCUGGAGUGCAUGGCAGCAAUGCUGUAGGCCUGCACUUGCAUGGGUUUGCAUGACCCGGGAGAUGAACCCACCAUUGUCUUCCUCUAUUGAUUGGAUUGAAGGGAGCUCCACAUCUCUCUC
pyr-3256	AUUGGAUUGAAGGGAGCUCCG	osa-MIR159d	-99.20	0.99	DangsuA,DangsuB	UGAUGUGAGGAGGAGCUCCUUUCGAUCCAAUUCAGGAGAGGAAGUGGUGGGAUGCAGCUGCCGGUUCAUGGAUACCUCUGCAGUUCAUGCCGGUAGGCCUGCACUUGCAUGGGUUUGCAUGACCUGGGAGAUGAACCUGCCAUUGUGUUCCUCUAUUGAUUGGAUUGAAGGGAGCUCCGGCUACACCUA
pyr-1705	UCGGACCAGGCUUCAUUCC	ppt-MIR166g	-53.40	0.68	DangsuA,DangsuB	GUGCGGAGGUGUUUAGGUGAAACUCUGCUGCGAGGAAUGCCCCCUGGCCCGAAGGCAUGUACUUCUCCCUCUUCGAAUGGUGUGAGCAUCAAGCUUCGGACCAGGCUUCAUUCCCCUCAGCGCAGUUACAUUUCGAUAUUCACGUC
pyr-1705	UCGGACCAGGCUUCAUUCC	ppt-MIR166f	-53.70	0.81	DangsuA,DangsuB	AUGACCAGCAUACCAGUGGUGCUGUGCUGGGAGGAAUGCUGCAUGGUCUGAUGCUUUUGCUGCGACACAAGCCUCGGACCAGGCUUCAUUCCCCUCAGCUCAGUCUCAUAUUGACGGUUCAAG
pyr-1705	UCGGACCAGGCUUCAUUCC	ppt-MIR166e	-46.00	0.63	DangsuA,DangsuB	AAUGUGCUUUUGGAGUUGUGAACCUUGCUGUGAGGAAUGCCGCAUGGACCGAAGCUAUGUGCUCCAUCUUAACGUGGUGGUAUUGAUACUACGUUUCGGACCAGGCUUCAUUCCCCUCAGCGCAGUUUCAUCAUGGUGAUGGACGG
pyr-1705	UCGGACCAGGCUUCAUUCC	ppt-MIR166d	-53.20	0.93	DangsuA,DangsuB	CAUAUUAGUCAUAUGCGGCUUGUCCUUGGGGAAUGAUGAUUGGACCGAAGUUUUUUAGCGUUGGUUUGCCCAAUUAAAGCUUCGGACCAGGCUUCAUUCCCCUCGUAGAAGUUGCAUGAUGAUGCAAU
pyr-1705	UCGGACCAGGCUUCAUUCC	ppt-MIR166c	-59.80	0.91	DangsuA,DangsuB	ACUUGGUGCAACAUGGGACUUUAUCGUGGGGAAUGCCGUCUGGACCGGAGCUGUGUGUCCACUCUGCAUCAAAGCUUCGGACCAGGCUUCAUUCCCCUCGAGGGAGUUUCAUAGCAGUGCUAU
pyr-1705	UCGGACCAGGCUUCAUUCC	ppt-MIR166b	-46.00	0.81	DangsuA,DangsuB	CUUUGUUGUGAGGAAUGCCGCAUGGACCGAAGCCAUGCGCUCCACAUCUAGACGGUGAUUUGGACGCUAUGCUUCGGACCAGGCUUCAUUCCCCUCAGCACAG
pyr-1705	UCGGACCAGGCUUCAUUCC	ppt-MIR166a	-43.90	0.78	DangsuA,DangsuB	UCUGCUGUGAGGAAUGCCCCCUGGCCCGAAGCCAUGUGCCUUUUCAUGUCCACGUGGGGUAAACAUUAAAGCUUCGGACCAGGCUUCAUUCCCCUCAGCACA
pyr-1705	UCGGACCAGGCUUCAUUCC	ptc-MIR166a	-55.00	0.98	DangsuA,DangsuB	UUUCUUUUGAGGGGAAUGUUGUCUGGCUCGAGGUCACUAAUGGGAUCUAUGAUUUUAUCUCAAUUGAUUGAUUUUCUUUUAAAUUCUAGUAAAUUGAAUUGAGAGAUAUCAUGAUCAACUUAUAUUUAAUGAUGUCGGACCAGGCUUCAUUCCCCCCAAUUGUU
pyr-1705	UCGGACCAGGCUUCAUUCC	ppt-MIR166i	-44.70	0.73	DangsuA,DangsuB	CUUGGAGAUUGGAUGGGACUUUGUCGUGGGGAUUGACGCAUGGCACGAAGCUAACAUCCUGAGAUCAGUUGCUUCGGACCAGGCUUCAUUCCCCUUGCCUAAGUUGCAUCAUGUAGUGCU
pyr-1705	UCGGACCAGGCUUCAUUCC	ppt-MIR166h	-43.50	0.73	DangsuA,DangsuB	AGUUCGACAAGACUAUGAGACUUUGUCAUGAGGAAUGACGAGUGGCCCAGAUUCGUUUCUGGUCUAGAAAUUGAAUUUCGGACCAGGCUUCAUUCCCCUUGGCACGGUUCCAUGGAGGUACUGUCA
pyr-1705	UCGGACCAGGCUUCAUUCC	ctr-MIR166	-116.20	0.81	DangsuA,DangsuB	GGUUUGUCUGAAGGAUCUAGGGUUAAUUGGGAAGCUUUUUCUUUUGAGGGGAAUGUUGUCUGGCUCGAGGCCACUAACUAGAUCUUUGAUUUAAUCUCAGUUGAUCAUAUAUUUGUUUCAUUUUUCUUCCAUAAAAUUUAAUUAUAUUGAGAUACCCAUCAUUGAUCUUAAGAUAAUUAAGUUAGUGACGUCGGACCAGGCUUCAUUCCCCCCAAUAAUUGCUUCUAUCUGCUAUGAUAUCAUCUUCAUUUCUUGGAGGUGCUGUGAUCAGUUCUCAAACUUUAGUUGAUUUUUUCACAAUUUUUCUUUUUGUUUAAUUUAUUGAUCUUGUGUUGUGUAUAUUUGUAUGGUCAACGGAGAGAUCUUGGUCAUUGGCCAUGAGCAGAUUGGUGUAAUGAU…
pyr-1705	UCGGACCAGGCUUCAUUCC	sbi-MIR166b	-49.50	1.03	DangsuA,DangsuB	GGGGAAUGAUGUCCGGUCCGAAGACGCUGUGCGGCGAAAGCGGCGGCGGCUUCGGACCAGGCUUCAUUCCCC
pyr-1705	UCGGACCAGGCUUCAUUCC	sly-MIR166b	-73.10	0.89	DangsuA,DangsuB	UCCCAUAGAUCAUAUGGAGGAAGUUCUCUCAGUUGAGGGGAAUGUUGUCUGGCUCGAGGUCACCAAUUAGAUCCAUAAUCCCUAUAUAUACCAUGCUUUUCAAAAAAAAGAUUUAUAAUAUGAAAAGGGGUUAUGAAUCAUGUGUUAGUGUUGUCGGACCAGGCUUCAUUCCCCCCAAUUGUUACUCCUCUAGCUAGGGGA
pyr-1705	UCGGACCAGGCUUCAUUCC	smo-MIR166a	-62.80	0.82	DangsuA,DangsuB	AGCAAGUCCUGGAUGUGGGGAUUGUUGCCUGGCUCGAGGGAGGCAUUCCUUUGAUCUUUUCUCUCCUGGGAAGUACUCCAGAAGAACUGUGCCAGAAAUGUGCGCUCUCGGACCAGGCUUCAUUCCCCUCAUCUGAGAUUGCACC
pyr-1705	UCGGACCAGGCUUCAUUCC	smo-MIR166b	-55.40	0.80	DangsuA,DangsuB	UUCCUCAGUGAGAACCAGGAUGUGGGGAGUGUAGCCUAGCUCGAGAGAUUGAUUUGAUACUAAGGCUACGCACACAAGGUUGUGAUCACAGCUUUGUCUCGGACCAGGCUUCAUUCCCCUCAGUGUGGUGCUCACU
pyr-1705	UCGGACCAGGCUUCAUUCC	smo-MIR166c	-60.90	0.87	DangsuA,DangsuB	UAUGUUGCGGGGAGUGCUGCCUGGCUCGAGACAGCAUCGCCGAGAUCUGAUCAAAUCGCAAAGUUGAGAAACAAGCAUCACAGUUUGAUCUGGAGAUCGUGUUGUGUCGGACCAGGCUUCAUUCCCCUCAGCUACAAA
pyr-1705	UCGGACCAGGCUUCAUUCC	hpa-MIR166a	-54.60	0.98	DangsuA,DangsuB	UUUGUGGGGAAUGUUGUCUGGCUCGAGACCACAAGAAAGCUUCAAUCUUUAUGAUCUUUAUGUUACAUAAUCACAUAAUUGAUCAAUCUUUGUUGAUCAAUGAUUAAAGAUUCUAAUCUUGUGUUGUCGGACCAGGCUUCAUUCCCCUCAUG
pyr-1705	UCGGACCAGGCUUCAUUCC	pta-MIR166b	-63.10	0.84	DangsuA,DangsuB	GGCAGAGUUGGGGUGAGGGGACUGCAGCCUGGCACGAGACCUGAAAACUUUUCUGACAAGCAGCCGGGCGGGCAGAGUCACGCAUGGUGUCGGACCAGGCUUCAUUCCCCUCACAACACUCUUCC
pyr-1705	UCGGACCAGGCUUCAUUCC	vvi-MIR166h	-41.20	0.82	DangsuA,DangsuB	AACAGUUGAGGGGAACGCUGUCUGGUUCGAGACCACUCGCUUCAAGUACAGACAUAAUCUGAAUGAUCUCGGACCAGGCUUCAUUCCCCCCAACUCAACA
pyr-1705	UCGGACCAGGCUUCAUUCC	ath-MIR166g	-47.20	0.89	DangsuA,DangsuB	GCGAUUUAGGGUUUAGAGGAAUGUUGUUUGGCUCGAGGUCAUGGAGAGUAAUUCGUUAACCCAACUCAAAACUCUAAAUGAUUCUCGGACCAGGCUUCAUUCCCCUCAACCUAUUUUAUCGC
pyr-1705	UCGGACCAGGCUUCAUUCC	vvi-MIR166f	-48.50	1.05	DangsuA,DangsuB	UGUAGUUGUGGGGAAUGUUGGCUGGCUCGAGGCUUUCUUGAGUGAUUUUAUGUAUACCUCAAAAAGCUUCGGACCAGGCUUCAUUCCCCUCAACACACUU
pyr-1705	UCGGACCAGGCUUCAUUCC	vvi-MIR166g	-58.00	1.23	DangsuA,DangsuB	AACAGUUGAGGGGAAUGUUGUCUGGUUCGAGAUCCUUCGUAUGAAGCUCAAGCAGCGUUUGAAUGAUUUCGGACCAGGCUUCAUUCCCCUCAACCCAAAA
pyr-1705	UCGGACCAGGCUUCAUUCC	vvi-MIR166d	-48.88	0.65	DangsuA,DangsuB	CUGCUUUGAGGGGAUUGUUGUCUGGCUCGAGGCCACCAACCAUCUUUGAUUGAUUCAAAUACUUUGAUCAGCUUCAACCCAUCUUCUCCUUCAAUUCAAUUCCACCCUCUGAUUAUGUGUUAGUGCCCUCGGACCAGGCUUCAUUCCCCUCAAUCACUGC
pyr-1705	UCGGACCAGGCUUCAUUCC	vvi-MIR166e	-69.90	0.92	DangsuA,DangsuB	GUGUUUUGAGGGGAAUGUUGUCUGGCUCGAGGACACCAACUAGAUCUAUGAUCUGCGUGUAAUUGUGAAUGGGUGAUCGUCUCUCAGUUUUGAAGGAGAGAUUUUGAGUGAUCUUUGAUCAUGGGUUGGUGUCGUCGGACCAGGCUUCAUUCCCCCCAAUUUAUUG
pyr-1705	UCGGACCAGGCUUCAUUCC	vvi-MIR166b	-41.20	0.98	DangsuA,DangsuB	GUUUUUUGAGGGGAAUGUUGGCUGGCUCGAGGCAUUCACAUAAGAAGAAGAUAUAUAAGUGAAGGUGUCGGACCAGGCUUCAUUCCUCUCAAAUAUACA
pyr-1705	UCGGACCAGGCUUCAUUCC	ath-MIR166d	-37.50	0.75	DangsuA,DangsuB	GGUUGAGAGGAAUAUUGUCUGGCUCGAGGUCAUGAAGAAGAUCGGUAGAUUGAUUCAUUUUAAAGAGUGAAAUCCCUAAAUGAUUCUCGGACCAGGCUUCAUUCCCCCCAACC
pyr-1705	UCGGACCAGGCUUCAUUCC	vvi-MIR166a	-44.40	0.79	DangsuA,DangsuB	GCGGGUGUUUGGAAUGAGGUUUGAUCCAAGAUCCUUCCUUUUUCUCCAUUAAUUCCUUCAGUACUGGUCAUGAUUUAGUUACUUCAUAAUCGGUUGAUCUCGGACCAGGCUUCAUUCCUGACACCAAGCU
pyr-1705	UCGGACCAGGCUUCAUUCC	ptc-MIR166d	-52.30	1.05	DangsuA,DangsuB	CGUGAGUUGAGGGGAAUGUUGGCUGGCUCGAAGCUUAAGCAAAGAGUUUUCUCUCAAGAAACAACUGUUAAGGCUUCGGACCAGGCUUCAUUCCCCUCAACCAAU
pyr-1705	UCGGACCAGGCUUCAUUCC	ath-MIR166e	-49.10	0.93	DangsuA,DangsuB	UUGAGGGGAAUGUUGUCUGGCACGAGGCCCUUAACUUAGAUCUAUAUUUGAUUAUAUAUAUAUGUCUCUUCUUUAUUCAUUAGUCUAUACAUGAAUGAUCAUUUUACGGUUAAUGACGUCGGACCAGGCUUCAUUCCCCUCAA
pyr-1705	UCGGACCAGGCUUCAUUCC	stu-MIR166d	-33.80	0.99	DangsuA,DangsuB	AGAAUGUCGUCUGGUUCGAGAUCUUUCAUAAGAAGGUAACAUGCAAUGAGAUGAUUUCGGACCAGGCUUCAUUCCCC
pyr-1705	UCGGACCAGGCUUCAUUCC	csi-MIR166d	-34.00	0.72	DangsuA,DangsuB	UUAUAAUGAAAAAAGGGUAUCGGACCAGGCUUCAUUCCCUUCAGAAUCAAAUUCAUUAUUUGAUCUUUUUGAGAGGUUAUGGUUGAUGGGAAUGUUGUUUGGCUCGAGGGUCAUCUAGGUUUUCAA
pyr-1705	UCGGACCAGGCUUCAUUCC	csi-MIR166e	-61.50	0.82	DangsuA,DangsuB	GGGGAGCUUUUUGUUUUGAGGGGAAUGUUGUCUGGCUCGAGGACACUACUUGUUGAUCCAUUAAUUUUACGUAUUCUCUCAUAGAUCUAGCAUCUGAAUGGUGGAUAACAAUAUACGGAUUCAGCUUAUUUGGCGUCGUCGGACCAGGCUUCAUUCCCCCCAAUAUAUUGCUUCUAU
pyr-1705	UCGGACCAGGCUUCAUUCC	ath-MIR166f	-41.00	0.89	DangsuA,DangsuB	AAGUUCAGGUGAAUGAUGCCUGGCUCGAGACCAUUCAAUCUCAUGAUCUCAUGAUUAUAACGAUGAUGAUGAUGAUGUCGGACCAGGCUUCAUUCCCCUCAACUU
pyr-1705	UCGGACCAGGCUUCAUUCC	csi-MIR166a	-64.60	0.91	DangsuA,DangsuB	GAAGCUUUUUCUUUUGAGGGGAAUGUUGUCUGGCUCGAGGCCACUAACUAGAUCUUUGAUUUAAUCUCAGUUGAUCAUAUAUUUGUUUCAUUUUUCUUCCAUAAAAUUUAAUUAUAUUGAGAUACCCAUCAUUGAUCUUAAGAUAAUUAAGUUAGUGACGUCGGACCAGGCUUCAUUCCCCCCAAUAAUUGCUUCUAUCUGC
pyr-1705	UCGGACCAGGCUUCAUUCC	csi-MIR166b	-67.90	0.87	DangsuA,DangsuB	CACGCGUCCGAUUGUUUGAUUUUUUUUGAGAGGUUAUGGUUGAUGGGAAUGUUGUUUGGCUCGAGGGUCAUCUAGGUUUUCAAAAUUUUCUCGGACUUUCUUUCUUGCUUUUAUUUUUCCAGGAAAAUUAUGUUAUUUGCCUAUGUGAUCUCGGACCAGGCUUCAUUCCCGUCAACCGACGGUUUCUCUCUU
pyr-1705	UCGGACCAGGCUUCAUUCC	csi-MIR166c	-57.00	0.98	DangsuA,DangsuB	UUCCUCCUCGAUCAUACAUGAACGGUUGAGGGGAAUGUUGUCUGGUUCGAGAUCACUCGUGGACGAAUUAAUUAAUAACUUAUUGUCUUUUGAAUGAUUUCGGACCAGGCUUCAUUCCCCCCAACUCAGUUUAAUUGC
pyr-1705	UCGGACCAGGCUUCAUUCC	gra-MIR166c	-71.70	1.35	DangsuA,DangsuB	GAUGGGAAUGUUGUUUGGCUCGAGGUCAUAUAGGUUGAUCUUUUAUAUAUAAUUUCCAUGAAAUUUUCUUGGAUUUAUUUAAAUUUUCCGGGAAAGUUUCUGGAUAUGUGUAUAUAUAUAGCCUUAUAUGAUCUCGGACCAGGCUUCAUUCCCGU
pyr-1705	UCGGACCAGGCUUCAUUCC	ath-MIR166c	-44.00	0.75	DangsuA,DangsuB	GCGAUUUAGUGUUGAGAGGAUUGUUGUCUGGCUCGAGGUCAUGAAGAAGAGAAUCACUCGAAUUAAUUUGGAAGAACAAAUUAAGAAAACCCUAGAUGAUUCUCGGACCAGGCUUCAUUCCCCCUAACCUACUUAUCGC
pyr-1705	UCGGACCAGGCUUCAUUCC	ath-MIR166a	-67.60	0.84	DangsuA,DangsuB	AGGGGCUUUCUCUUUUGAGGGGACUGUUGUCUGGCUCGAGGACUCUGGCUCGCUCUAUUCAUGUUGGAUCUCUUUCGAUCUAACAAUCGAAUUGAACCUUCAGAUUUCAGAUUUGAUUAGGGUUUUAGCGUCUUCGGACCAGGCUUCAUUCCCCCCAAUUGUUGCUCCCU
pyr-1705	UCGGACCAGGCUUCAUUCC	cpa-MIR166e	-34.40	0.78	DangsuA,DangsuB	GGAAUGUUGGCUGGCUCGAGGCUUUGACAAAACAGGGUUCUUCUGCAACAAGAACUUCAAAAAGGCUUCGGACCAGGCUUCAUUCCCC
pyr-1705	UCGGACCAGGCUUCAUUCC	cpa-MIR166d	-44.60	0.78	DangsuA,DangsuB	GGAAUGUUGUUUGGCUCGAGGUCAUCUGUGAUAGCCUCUGAAAUUUUCUUAGGGGCCUUUUUACUUUCCCGGAAAAUUUCUGCAUCUACAUACCUCUAGUUGAUCUCGGACCAGGCUUCAUUCCCG
pyr-1705	UCGGACCAGGCUUCAUUCC	atr-MIR166b	-68.70	0.94	DangsuA,DangsuB	AUGGGGGGAAAACCUUUGUGUGGAAUGAGGUUUGAUCCAAGAUCUCUUUCCAUAUGUGGAUCAUGUGAACUUGCACCUUUGCAUGUUGGCAAACCCUCUUCUAUGAAUAGAUCUCGGACCAGGCUUCAUUCCCCACACUGGUUUUCCACAAUAAAUUGAAACCCCAU
pyr-1705	UCGGACCAGGCUUCAUUCC	atr-MIR166c	-62.20	0.93	DangsuA,DangsuB	UCAGAUGAUGAUGAUAUAUGCAUAUGAGUUGUGGGGAAUGUUGUCUGGCUCGAGGUACAUCUGGGGUUAUCUUGAGUCACAUUCCAGAUGAUCUCGGACCAGGCUUCAUUCCCCUCAACCAAGCCGAGCUCAUCCUUCUUAUGA
pyr-1705	UCGGACCAGGCUUCAUUCC	cpa-MIR166a	-43.30	0.79	DangsuA,DangsuB	GGAAUGUUGUCUGGCUCGAGGACAUUUAAUUCUAUGCAUCCAUCCAUCCAUCCAUUUACAUCUCCAGAUCUGGACUACUUGGAUUAAUUUUGAGUUAGUGUCGUCGGACCAGGCUUCAUUCCCC
pyr-1705	UCGGACCAGGCUUCAUUCC	cpa-MIR166c	-39.90	0.87	DangsuA,DangsuB	GGAAUGCUGUCUGGUUCGAGACCAUUCAUUAAUUCAAACUAAGCUUAAUUUGAAGAUUGAGUUCAUUGUCCAUCUCCUCUUAAUUAGUGAUCUCGGACCAGGCUUCAUUCCCC
pyr-1705	UCGGACCAGGCUUCAUUCC	cpa-MIR166b	-41.50	1.06	DangsuA,DangsuB	GGAAUGUCGUCUGGUUCGAGAUCAUUCAUGUGAAGGUUCGAGAUCGUUUCUUGGAUGAUUUCGGACCAGGCUUCAUUCCCC
pyr-1705	UCGGACCAGGCUUCAUUCC	mdm-MIR166i	-52.20	1.24	DangsuA,DangsuB	AGUUGAGGGAAAUGUUGUCUGGUUCGAGAUCUUUCAGUGAAGCUUGGAUAUUGUCAUCAUCUGAAUGAUUUCGGACCAGGCUUCAUUCCCCUCAACU
pyr-1705	UCGGACCAGGCUUCAUUCC	osa-MIR166d	-54.10	0.89	DangsuA,DangsuB	GAAGCUUUUUCACUUUGAGGGGAAUGUUGUCUGGCUCGAGGUGCAUGGAGAAACCUCUGAUCGAUCAGGUUUGAUCUGUAGAGACUGAUCUCGGACCAGGCUUCAUUCCCCUCAAGUAAAGCUCC
[truncated: 6,148 more rows]
