# Supplementary material for: The Effect of Different Pollination on the Expression of Dangshan Su Pear MicroRNA
Source: Biomed Res Int. 2017 Apr 10;2017:2794040. doi: 10.1155/2017/2794040 (PMC5402243; doi:10.1155/2017/2794040)
Supplement: Supplementary file 1 — These Supplementary Materials contained the detailed data of the primer sequences used in this study, those known and novel microRNAs, differentially expressed microRNAs, the target genes of the differentially expressed microRNAs and which corresponding GO function enrichment analysis and KEGG pathway analysis in “Dangshan su” Pear of different male parent pollination. [file 2794040.f1.zip › Supplementary Material/Supplementary Material2/quantifier_miRseq.known_partial_detected.stat.xls]

##Detected microRNAs in partial samples
#mature id	mature sequence	precursor id	MFE(kcal/mol)	MFEI	Samples detected	precursor sequence
pyr-2165	UGGAGAAGAAGGGCACAUGCA	bdi-MIR164f	-103.40	0.88	DangsuB	AGGCGAGGCUUGCGCGGUGGAGAAGAAGGGCACAUGCAUGCACACACACGCGCAUGGCCGGCCGCUCGGGCGACACGCGCGCCCAGGCCGCGGCGCGGCACACCGGCGGCGAGCUGGAACGAAUGCACGUGCCCUGCUUCUCCACCUCGCGCGCCUCGCCU
pyr-3509	UGCUUACUCUCUAUCUGUCACC	sly-MIR156e	-60.10	1.47	DangsuA	UGGUGGUGAUAGAAGAGAGUGAGCACACAUGGUGUUUUCUUGCAUGAUGUUUAUAUAUAUAUAUGCUUGAAACUAUGUGUGCUUACUCUCUAUCUGUCACCCCCA
pyr-3509	UGCUUACUCUCUAUCUGUCACC	mes-MIR156g	-50.80	1.18	DangsuA	GGUGACAGAAGAGAGUGAGCACACAUGGCAUUUUCCUGCAUGACUUUACAUGCUCGAAGCUCUGCGUGCUUACUCUCUAUCUGUCACC
pyr-3509	UGCUUACUCUCUAUCUGUCACC	gma-MIR156y	-47.60	1.08	DangsuA	UAAGGGAGGUGACAGAAGAGAGUGAGCACACAUAGUACUUUCUUGAAUGAUAUAAGGUUUCAUGCUUGAAGUUAUGCGUGCUUACUCUCUAUCUGUCACCCAUCAC
pyr-3509	UGCUUACUCUCUAUCUGUCACC	cme-MIR156a	-61.40	1.33	DangsuA	AAGGGGAGGUGACAGAAGAGAGUGAGCACAUAAGGUAACUUUCUUGCAUGUUAGGGUUCAUGCUUGAAGCUUUAUGUGCUUACUCUCUAUCUGUCACCCACCAAAA
pyr-3509	UGCUUACUCUCUAUCUGUCACC	ppe-MIR156d	-58.40	1.12	DangsuA	GGGUAAUGGAGGUGACAGAAGAGAGUGAGCACACAAGGUGUUUUCUUGCAUGGUGGGUUUCAUGCUUGAAGCUUUGCGUGCUUACUCUCUAUCUGUCACCCACUUUUCUC
pyr-3509	UGCUUACUCUCUAUCUGUCACC	mtr-MIR156c	-53.50	1.19	DangsuA	GGUGGUGACAGAAGAGAGUGAGCACACAUGGUGUUUUCUUGCACGAUUAUGUUUCCUGCUUGAAGCUAUAUGUGCUUACUCUCUAUCUGUCACCCCAC
pyr-3509	UGCUUACUCUCUAUCUGUCACC	rco-MIR156c	-56.00	1.14	DangsuA	GGAGGUGACAGAAGAGAGUGAGCACACAUGGUACUUUCCUGCAUGAAUUCAUGCUCGAAGCCUUGCGUGCUUACUCUCUAUCUGUCACCCCGCC
pyr-3509	UGCUUACUCUCUAUCUGUCACC	stu-MIR156g	-49.10	1.40	DangsuA	UGACAGAAGAGAGUGAGCACACAUGGUGUUUUCUUGCAUGAUGUUUAUAUGCUUGAAACUAUGUGUGCUUACUCUCUAUCUGUCACC
pyr-3509	UGCUUACUCUCUAUCUGUCACC	mdm-MIR156o	-50.70	1.13	DangsuA	GACGGUGACAGAAGAGAGUGAGCACACAUGGUAUUUUCUUGCAUGCUGGGUUCAUGCUUGAAGCUUUGCGUGCUUACUCUCUAUCUGUCACCAUC
pyr-1591	AUUCAAGGCUCAAACUCGAGACCU	stu-MIR8021	-64.20	0.87	DangsuB	AUUCAAGGCUCAAACUCGAGACCUCUGGUUAAGAUAGAUGGAUCAUAUAUAUCCCACCACAACUUUUGUUGGUACUAAUAAUGACUUAAUUUACUUUCUCUUAAAAAUUAGGCAAUAUGUUGGAUUUAUUUGUUGUGUUCUACCCACAAAGAUUUGGUUGAGUGGAAGUUAGUAUUUAUUUAUCCUUAACCAGAAGUGUCAAGUUCGAGUCUUGGACAU
pyr-1067	CAGAUCAUGCUGCAGCUUCAU	tae-MIR167c	-69.80	0.89	DangsuA	CCUUUGCUGGUGUGAGAGACUGAAGCUGCCAGCAUGAUCUGCUCAUCCAGCAUGCGCCGAACCGCGUUCGGUUGCGCGGGGUUAUCUUGGAAUUUUUGCUCCAUCAGAUCAUGCUGCAGCUUCAUUUUCUCACGGCCACCAACAGA
pyr-1067	CAGAUCAUGCUGCAGCUUCAU	ata-MIR167f	-62.00	0.94	DangsuA	UGUGAGAGACUGAAGCUGCCAGCAUGAUCUGCUCAUCCAGCAUGCGCCGAAACCGCGUUCGGUUGCGCGGGGUUAUCUUGGAAUUUUUGCUCCAUCAGAUCAUGCUGCAGCUUCAUUUUCUCACGG
pyr-1060	AGCAUCUUCAAGAUUCACA	cme-MIR172c	-36.30	0.96	DangsuA	GCGGGUGUAGCAUCUUCAAGAUUCACAACAUAUGCAAAUAUUAUCGAAAUAAAAAUAAUAUGAUGCUCAAAAAUCUCAACUUGAGAAUCUUGAUGAUGCUGCAUCAGCAAUCAA
pyr-1060	AGCAUCUUCAAGAUUCACA	nta-MIR172a	-51.80	1.10	DangsuB	UUUUGCAGAUGCAGCAUCUUCAAGAUUCACAUAUAGUAUAUUUUAUGGAGUUCAAUUGUGGGAGAAAAAAAUUAAAUUUUCUUGCUCCCUAUGGCUCCUUAAUUUAAUAUGAGAAUCUUGAUGAUGCUGCAGCAGCAAUGAA
pyr-4766	UUUGAGUGCAGCGUUGAUGA	mes-MIR397	-27.20	0.91	DangsuB	UCAUUUGAGUGCAGCGUUGAUGAAUUUCCUACAAUUUUCUAAGAUUUUAAUUUUGUUGAAGGAUUUUACCAGCGCCGCACUUAAUCA
pyr-671	UGGCUCUGAUACCAAUUGAUG	vvi-MIR845d	-30.20	0.59	DangsuA	AUAACCAACAUUAAUUAUCCCUAGGGCCAUGGGAUAAACAAAAACUCUGCAAAACCAAGUUAGCACACCCUAGAAUGGUUCUAGCACAAUUACUAACCUAUGGCUCUGAUACCAAUUGAUGGGAAAAACCU
pyr-671	UGGCUCUGAUACCAAUUGAUG	vvi-MIR845e	-29.40	0.57	DangsuA	AGAACGCACAUUAAUUAUCCCUAGGGCCAUGGGAUAAACAAAAACCUUGAAAAAACAAGUUAGCACACCCUAGAAUGGUUCUAGCACGAUUACUAACCUAUGGCUCUGAUACCAAUUGAUGGGAAAAACUC
pyr-897	AUUGGAGUGAAGGGAGCUCUG	mes-MIR159c	-95.70	0.90	DangsuB	GGGUUUUUGGUGAGGUUUAAUGGAGCUCUCUUCCCUCCUACUGUAAAGGAGGCGAAGGUAGGUAGGCCAUGGCUGCCAGUUCAUGAAUACCCCUGGGUGUGCAGGAUAAGCAGAGAGAGUGCGCAGGCUAAGGGUUUGCAUGACCUGGGAGACGUGGUUAUCUUGGCCAUUUUUAUAUUGGAGUGAAGGGAGCUCUGUUGUCUUUCUAACAAUCU
pyr-897	AUUGGAGUGAAGGGAGCUCUG	mes-MIR159d	-95.00	0.91	DangsuB	UAAUGGAGAUCUCUUCACUCCUAUGUAAAGGAGGCAAUGGUAGGCCAUGGCUGCUAGUUCAUGAAUACCCCUGGGUGCGCACUGUGCAGGAUAAGCAGAUAUCGAUUGAUCAUGAUUAUUAUGGGAUUGGCUUGGGUGCGCAGGCUAAGGGUUUGCAUGACCUGGGAGACGUGGUUGCCUUGGCAUUUUUUAUAUUGGAGUGAAGGGAGCUCUGUUG
pyr-3620	UGAAGUGUUUGGAGGAACUC	lus-MIR395e	-56.50	1.07	DangsuA	ACCAGGUGUCCCCUGGAGUUCCUCUGAACGCUUCACUGAGGCUCUGUUAUGGCAGAUGAGUUCACUGAAGUGUUUGGAGGAACUCUGGGUGUGGCUUGGU
pyr-3620	UGAAGUGUUUGGAGGAACUC	aly-MIR395i	-42.10	1.28	DangsuA	CUCAAGAGUUCCUCCGAACACUUCAUUGAAAAAAGGUUCUCCAUUUUCGUAAUUUUUUUUUACUGAAGUGUUUGGAGGAACUCCAGAUGAUAU
pyr-3620	UGAAGUGUUUGGAGGAACUC	cca-MIR395b	-46.90	1.20	DangsuA	AAGUGUCCCUAUGAGUUCCUUCGAGCACUUCAUUGGGAAGCUUUAUUUAGGAUUUCCUACUGAAGUGUUUGGAGGAACUCUAAGUGCCACUU
pyr-3620	UGAAGUGUUUGGAGGAACUC	cca-MIR395c	-45.40	1.08	DangsuA	AAGUGUCCCUCAGAGAUCCUCCGAACACUUCAUUGGGAUGUUUUGUUUAGGAUUUCCUACUGAAGUGUUUGGAGGAACUCCAAGCGUCGCUU
pyr-4690	UGGAGAAGCAGGACACGUGAG	zma-MIR164e	-73.70	0.98	DangsuA	GUGGAGAAGCAGGACACGUGAGCGACCAUCCAGUUCCACUCCCGCUGGCUCGCUGCUGGAGCUCCCGGCGGCUUGGUGAGUUUGGGUGGUCGUUCAUGUGUCCGCCCUCUCCACCG
pyr-4690	UGGAGAAGCAGGACACGUGAG	sbi-MIR164c	-90.40	0.95	DangsuA	UAUGGUGUGUUUGUGCAGGGUGGAGAAGCAGGACACGUGAGCGACCAUCCAGUUUCCAUCGCUGGCUCUCCGCUGCGGGCGCUGCCGUGCGUUGGAUCGUCGUUGGGUGGUCGCUCAUGUGUCCGUCCUCUCCACCGAGCACCGGUACAUCCG
pyr-4699	AUUCAGUUGAUGCAAGGCGGGAUC	aau-MIR168	-58.20	0.78	DangsuA	CUCCGAUUCAGUUGAUGCAAGGCGGGAUCCGAUUCAACGCCGGUAAGGAAACCGUCCAUUUCGCGCCAUCCGGCGCGGUGGUGGAAGCAGAACCGGUUCCCGACCUGCACCAAGCGAAUUAGAGACC
pyr-4162	CUUACCACAUUUUUAUACCAU	ppe-MIR6291a	-66.10	1.38	DangsuA	AAAUGCUAGACUUACCACAUUUUUAUACCAUAUUGUGUAUCACCUCUCUAAUAGAGGUGGGCUCCAUCCUUAUUAAAGAGGUGGUAGGUAGUACACAAUGUGAUAUAAAAAUGUGGUAAGCCUAGCACUA
pyr-4342	UGAGCCAAAGAUGACUUGCCG	mtr-MIR169i	-35.00	0.88	DangsuB	GAUUUGAGCCAAAGAUGACUUGCCGGCAUGCUGCCUGAAAAGCAAGAAGGGUGUUGUUUUGCUGGCAGUUGUCAUUGGUUCAUGUU
pyr-4342	UGAGCCAAAGAUGACUUGCCG	mtr-MIR169h	-35.00	0.88	DangsuB	GAUUUGAGCCAAAGAUGACUUGCCGGCAUGCUGCCUGAAAAGCAAGAAGGGUGUUGUUUUGCUGGCAGUUGUCAUUGGUUCAUGUU
pyr-4187	UGAAUGGAGAUACGGAAUGAAGC	rgl-MIR7811	-22.00	0.69	DangsuB	CAUACUUCAUUGAAUGGAGAUACGGAAUGAAGCUUAUCAUUGCCCGAAAUAUGCUUCAUAAUCCGUAUGUAAUUUCGGGUAGUCUA
pyr-479	GCAGCACCAUCAAGAUUCACA	bol-MIR172a	-43.40	1.01	DangsuA	CGUUUUUUGUAGGCGCAGCACCAUCAAGAUUCACAUGGAAAUUGAAAAAUCUCCUAAUUUUUAAUUAGGGUUUUGAUAUGUAUAUGAGAAUCUUGAUGAUGCUGCAUCAACAACCGACG
pyr-479	GCAGCACCAUCAAGAUUCACA	stu-MIR172b	-30.10	0.97	DangsuA	GCAGCACCAUCAAGAUUCACAUAGAAAAUAUGGACUAUGAAAUGAAAUAUGCCCAAUUUUUGAAUACAUGAGAAUCUUGAUGAUGCUGCAU
pyr-479	GCAGCACCAUCAAGAUUCACA	aly-MIR172b	-51.60	0.96	DangsuA	UAGCUCAUCUGUCGUUGUUUGUAGGUGCAGCACCAUCAAGAUUCACAUGAAAAUUGAUAAAUCUCCUAAAUUAGGGUUUUGAUAUGUAUAUGAGAAUCUUGAUGAUGCUGCAUCAACAAUCGACGGCUACAAAAUACCUAAAGCUG
pyr-479	GCAGCACCAUCAAGAUUCACA	bna-MIR172a	-40.20	1.09	DangsuA	UUUUGUAGGCGCAGCACCAUCAAGAUUCACAUGGAAAUUGAAAAAUCUCCUAAUUUUUAAUUAGGGUUUUGAUAUGUAUAUGAGAAUCUUGAUGAUGCUGCAUCAACAAC
pyr-479	GCAGCACCAUCAAGAUUCACA	sbi-MIR172c	-49.30	0.95	DangsuA	GUGCAGCACCAUCAAGAUUCACAUGGUCCAACUCAUGCAUCUUCAGUGAUGCUCAUGUGAUGGCUCGCAGUUGCUAUAUAUGCAUAUGUGAUGAGAUGAGAAUCUUGAUGAUGCUGCAU
pyr-479	GCAGCACCAUCAAGAUUCACA	zma-MIR172d	-34.00	0.97	DangsuA	GUGCAGCACCAUCAAGAUUCACAUCCCCAGCUCGAUCUGUGCAUGAUGAGAUGAGAAUCUUGAUGAUGCUGCAU
pyr-479	GCAGCACCAUCAAGAUUCACA	bra-MIR172a	-43.40	1.01	DangsuA	CGUUUUUUGUAGGCGCAGCACCAUCAAGAUUCACAUGGAAAUUGAAAAAUCUCCUAAUUUUUAAUUAGGGUUUUGAUAUGUAUAUGAGAAUCUUGAUGAUGCUGCAUCAACAACCGACG
pyr-479	GCAGCACCAUCAAGAUUCACA	osa-MIR172d	-55.30	0.91	DangsuA	AAACAGUCGGUGCUUGCAGGUGCAGCACCAUCAAGAUUCACAUCGAGUUCAUCCCUAAACGAGAUCGAGGUUGGCUGACUAUAUGUGAUGAGAAUCUUGAUGAUGCUGCAUCAGCAAACGCUCGACUACU
pyr-479	GCAGCACCAUCAAGAUUCACA	zma-MIR172b	-53.50	1.03	DangsuA	GUGCAGCACCAUCAAGAUUCACAUCGUCCAACUCAUGCAUCAUGCAUAUAUGCAUCUUCAAUGAUGCGUGCCUCGCAUGUGUGUGUAUAUAUAUAUGAUGAGAUGAGAAUCUUGAUGAUGCUGCAU
pyr-479	GCAGCACCAUCAAGAUUCACA	gma-MIR172g	-45.60	1.01	DangsuA	GCAGGUGCAGCACCAUCAAGAUUCACAUGCAAUUUACACCCUAUAAGAGAUUUUUGACAAAAUUUCUUUCCUAGGAGAGUUUUGACUUGAGAAUCUUGAUGAUGCUGCAUCAGC
pyr-479	GCAGCACCAUCAAGAUUCACA	lja-MIR172c	-47.30	1.18	DangsuA	AGUCGUUGUCUGCAGGUGCAGCACCAUCAAGAUUCACACACAAAUUAUAAGUGUUUUGGUGUUGAGAAUCUUGAUGAUGCUGCAUCAGCAAUAAACGAUU
pyr-479	GCAGCACCAUCAAGAUUCACA	cme-MIR172d	-45.20	0.98	DangsuA	GUUGGUGCAGCACCAUCAAGAUUCACAAAGGCUUUAAUUAUUAUUUACGUUUAAAUUCUCUUUCCUUAAUUUUAUUCAAAUUUAAAAAAGAAAAGAAAGAAAAAAGAAAAAAGCCUUUUCCUUUGGGAAUCUUGAUGAUGCUGCAUCGUCAAAUAC
pyr-1937	UAGGAGAGGGGGGAAGGGAUCU	hvu-MIR6192	-40.60	0.69	DangsuA	GCCGCUGUACAUAGUGUUUCGUCUCUGGAUCUCCCUGUCCUUGUGGGGAGUCCUUGUUGUUCUAGUCAUGGAGGAGUUGUCAUAGGAGAGGGGGGAAGGGAUCUUGUUUUAGGG
pyr-3287	UUUGGGAUCAUGCUAUCCCUU	gma-MIR393b	-38.20	0.85	DangsuA	AGAGGAGGCAUCCAAAGGGAUCACAUUGAUCCCAAAUCCAAGCUUCAAUGUUCUUCUCUCUUUCUCACUCAAAAUAUUAAUUUUAUUUGGGAUCAUGCUAUCCCUUUGGACUUCUC
pyr-3576	GGCAAGUUGUCCUUGGCUACA	vvi-MIR169c	-57.50	1.20	DangsuB	GGGAGUAGAAUGCAGCCAAGGAUGACUUGCCGGAGAUGGGGCAUUCCUCGUUAAUCCGGCAAGUUGUCCUUGGCUACAUUGGGCUCUCUU
pyr-3576	GGCAAGUUGUCCUUGGCUACA	vvi-MIR169a	-60.60	1.19	DangsuB	GAGAGUGGAAUGCAGCCAAGGAUGACUUGCCGGAAUUUAUAUAUAGUGAGAAGAGAAGAGGCUAUAUGCUUUCACAUAUAUAGUGAACCCUGGCAAGUUGUCCUUGGCUACAUUUGAUUCUCUU
pyr-3576	GGCAAGUUGUCCUUGGCUACA	mes-MIR169g	-41.00	1.00	DangsuB	UAUGCAGCCAAGGAUGACUUGCCGACCAGUGGCCUAUUCAAGAAGAAGCAAAAGACCAAGUUGGCAAGUUGUCCUUGGCUACAUG
pyr-3576	GGCAAGUUGUCCUUGGCUACA	mes-MIR169f	-48.20	1.15	DangsuB	GGUGUAGCCAAGGAUGACUUGCCGGAAAAACUCUCCAUAAAUUUUCUGGUGAUUCAUCUUCGGUUUUUAAUCAGAAUUUCGGCAAGUUGUCCUUGGCUACAUU
pyr-3576	GGCAAGUUGUCCUUGGCUACA	vvi-MIR169d	-46.70	0.95	DangsuB	GAGUGGAAUGCAGCCAAGAAUGAUUUGCCGGAAUUUAUAUAUAGUGAGAAGAGAAGAGGCUAUAGGCUUUCACAUAUAUAGUGAACCCUGGCAAGUUGUCCUUGGCUACAUUUGAUUCUC
pyr-3576	GGCAAGUUGUCCUUGGCUACA	ath-MIR169a	-74.80	1.07	DangsuB	GUGACGAAAGUAGUGUGCAGCCAAGGAUGACUUGCCGAUUUAAAUGAUCUUUCUUUAUACUCUAUUAAGACAAUUUAGUUUCAAACUUUUUUUUUUUUUUUUUUUUGAAGGAUUCAGGAAGAAAUUAGGAUAUAUUAUUCCGUAUAAAAUACAAGAUAUAUAAAACCAAAAAGAAAAAGUAACAUGAUCGGCAAGUUGUCCUUGGCUACACGUUACUUUGUGUCGC
pyr-3576	GGCAAGUUGUCCUUGGCUACA	aly-MIR169a	-88.40	1.00	DangsuB	AACGCGUAUGUGACGAAAGUAGUGUGCAGCCAAGGAUGACUUGCCGAUUUAAAUGAUCUUUCUUUAUACUCUAUUAAGACAUUUUAAGUUUCAAAUUUCUUUGGUUCUUCAAGGAUUAAGGAAGAAAGUAGGCUAUAUAUGUAGAUAUAUAUAUUAUGCUGUAUUAAAUAUAUGUACAAGAUAAGACCAAAAAAGAAAAAGUAACAAUCAUGAUCGGCAAGUUGUCCUUGGCUACACGUUACUUUGUGUCGCGCAUAGGUGUU
pyr-3576	GGCAAGUUGUCCUUGGCUACA	zma-MIR169r	-55.90	0.87	DangsuB	GCAGCCAAGGAUGACUUGCCGGGUAUUUUGAGCAUGCAUGUUACAGGGGAGCAUAUGCAAUCUGUUUGGAAUUUUGAGCCCAUACCGUGCGGUGCCUGUCUUCCGGCAAGUUGUCCUUGGCUACAU
pyr-3576	GGCAAGUUGUCCUUGGCUACA	ata-MIR169d	-55.90	1.02	DangsuB	GAACGGGAUGCAGCCAAGGAUGACUUGCCGGCUCCUGGUGUUGGGAGUUCACUGAGCUUUAGAGUUAGCCGGCAAGUUGUCCUUGGCUACACCUAGUUCUC
pyr-3576	GGCAAGUUGUCCUUGGCUACA	tcc-MIR169e	-52.90	0.90	DangsuB	UAGGCACAGAAAGUGAAGUGCAGCCAAGGAUGACUUGCCGAUUCUUUCUCUUAUAUCCAUUCAGUUUUACCAACACUAGCAACUCAUAUGUAAAGACGAAUUUAAAUCGGCAAGUUGUCCUUGGCUACAUGUUUCUUUUUGCUCCAC
pyr-2575	CGAGCCGAAUCAAUAUCACUC	mtr-MIR171h	-36.40	0.93	DangsuB	AAGUAGACAGGAGUGGUGUUGUUUCUGCUCAUCUUAUUAAAUAAUGAAUGAAUGAAUGACAUUUGCUUACUUAUAAGACGAGCCGAAUCAAUAUCACUCCAGUACACCU
pyr-2575	CGAGCCGAAUCAAUAUCACUC	ghr-MIR479	-43.30	1.14	DangsuB	GGAGGAGUAGACACGACGUGAUAUUGGUUCGGCUCAUCUUAUUGUGAUUAAAAAUUUCAAGGCGAGCCGAAUCAAUAUCACUCAUGUAUGCUUUUUU
pyr-2575	CGAGCCGAAUCAAUAUCACUC	ptc-MIR171m	-42.20	0.90	DangsuB	GAAGCAGACAUGGCGUGGUAUUGAUCCGGCUCAUCUUCUGUAUUUGCAUCAGAAGUUCUUCGCUGAAGACGAGCCGAAUCAAUAUCACUCUUGUACGCUUC
pyr-2575	CGAGCCGAAUCAAUAUCACUC	ppe-MIR171d	-41.90	0.72	DangsuB	CAAGUAGACAUGGUGUGAUAUUGGUUCGGUUCAUAUCUUUUAUACUUUUUGGAUAUAUCCAUCCAUCCAUUCAUCCAUCCAUCCAUCCAUCACACUUCACGAAUCACAAACAAAGAUGACGAGCCGAAUCAAUAUCACUCUUGUAUGCUUG
pyr-2575	CGAGCCGAAUCAAUAUCACUC	ptc-MIR171j	-42.10	0.92	DangsuB	GAAGCAGACAUGGCGUGGUAUUGAUCCGGCUCUUCUUCUGUAUUUGCAUCAGAAGUUUUUCGCUGAAGACGAGCCGAAUCAAUAUCACUCUUGUACGCUUC
pyr-2575	CGAGCCGAAUCAAUAUCACUC	gma-MIR171b	-35.80	0.99	DangsuB	UAGACACGGCGUGAUAUUGGUACGGCUCAUCUUAAUUCAACCAUUAUAUCAACAAUUGAGACGAGCCGAAUCAAUAUCACUCUUGUUUGCUU
pyr-2575	CGAGCCGAAUCAAUAUCACUC	ptc-MIR171l	-49.90	1.00	DangsuB	GGAGAAGUAGACACGGUGUGAUAUUGGUCCGGCUCAUCUUCUGUGCAUAAGCAUCUGAAGUUCUUCACUCAUGAAGACGAGCCGAAUCAAUAUCACUCUUGUAUGCUUCUUC
pyr-2575	CGAGCCGAAUCAAUAUCACUC	csi-MIR479	-48.60	0.93	DangsuB	AUUGGAGAAGUAGACAUGGUGUGAUAUUGGUUCGGCUCAUCUUAAUUAAUAGAUUCAUAUUUCAGCCCUUAAGGUUCUUACAUGUAUAUAUCUAGACGAGCCGAAUCAAUAUCACUCUUGUAUGCUUCUUUCUUUUGAUUUUGCACC
pyr-2575	CGAGCCGAAUCAAUAUCACUC	gma-MIR171h	-46.00	0.82	DangsuB	GCAAAAGUAGACACGGCGUGAUAUUGGUACGGCUCAUCUUAAUUCAACCACUAUAUCAACGAUUGAGACGAGCCGAAUCAAUAUCACUCUUGUUUGCUUCAUUGCAUAUAUAUAUAUACUAGCAGCUUUUUCUUUAGAAACCAAACUAUGC
pyr-2575	CGAGCCGAAUCAAUAUCACUC	csi-MIR171b	-53.70	0.87	DangsuB	CAGGCAGAGAAAGCACUUCUUGGCGAUUGGAGAAGUAGACAUGGUGUGAUAUUGGUUCGGCUCAUCUUAAUUAAUAGAUUCAUAUUUCAGCCCUUAAGGUUCUUACAUGUAUAUAUCUAGACGAGCCGAAUCAAUAUCACUCUUGUAUGCUUCUUUCUUUUGAUU
pyr-2575	CGAGCCGAAUCAAUAUCACUC	mtr-MIR171g	-37.72	0.77	DangsuB	GCUUCAGCUGCAAAAGUAUACAUGGCGUGAUAUUGAUCCGGCUCAUCUAUAUCUUCAAGUUCAAUCAUCCAUAUUCAUAUCAAUUUCAGACGAGCCGAAUCAAUAUCACUCUUGUUUGCUUCAUUGCAUAUUAAUU
pyr-2974	GUAGCAUCAUCAAGAUUCACA	atr-MIR172	-110.50	0.84	DangsuB	GUUGUUUGUUUGAUGCAUGGGGUAGAAGAGAGAGAAAAGAAGAAAAAAGAGGAGGAGGAGGAGGAUAUCAGUCAGUGUUUGCUGGUGUAGCAUCAUCAAGAUUCACAUCUUGUAAGAGAUCCCUUUGAAUCGGUGGGAUCACACUUCACUACAUAAGAUCACGAUUUAGAGAGGGAAAGCUGACCAUAAGAUGGGAAUCUUGAUGAUGCUGCAUCGGCAAUAAGUGACUUUGUGUUUCACCGUUCGUUGCCACCCUCAUUUGCACUCUCCUCGGCAAAGGUGAGAGAAACAGAGGAC
pyr-2974	GUAGCAUCAUCAAGAUUCACA	nta-MIR172h	-50.20	1.14	DangsuB	GUUUGCGGGUGUAGCAUCAUCAAGAUUCACAUGAAAAGGCAAGGUGAAAUGAAAUUAAUUAAGAGCCAUGGCUUUUUGAAGGUGAGAAUCUUGAUGAUGCUGCAUCAGCAAUAA
pyr-2974	GUAGCAUCAUCAAGAUUCACA	nta-MIR172e	-126.30	0.93	DangsuB	GUUUGCAGAUGUAGCAUCAUCAAGAUUCACAUAAAAAACGCAUGGUGAUGAGCUGAUGAAAUGACAUUAAUGGCCAAGGCAGCUUUCUGAAGGUGAGAAUCUUGAUGAUGCUGCAUCAGCAAUAAACGACUACCUGAUUUAUCAUUAUGCCAUUGGAACGAUACACAGAUAAUUAGCAUAAUUCAUGUGCAAGAAUGCCACGGGUACAUGGUAUGGUUCAAUUGAUACAGUCGUUGUUUGCGGGUGUAGCAUCAUCAAGAUUCACAUGAAAAGGCAAGGUGAAAUGAAAUUAAUUAAGAGCCAUGGCUUUUUGAAGGUGAGAAUCUUGAUGAUGCUGCAUCAGCAAUAA
pyr-2974	GUAGCAUCAUCAAGAUUCACA	nta-MIR172d	-47.60	0.95	DangsuB	GUUUGCAGAUGUAGCAUCAUCAAGAUUCACAUAAAAAACGCAUGGUGAUGAGCUGAUGAAAUGACAUUAAUGGCCAAGGCAGCUUUCUGAAGGUGAGAAUCUUGAUGAUGCUGCAUCAGCAAUAAA
pyr-2974	GUAGCAUCAUCAAGAUUCACA	nta-MIR172f	-67.60	0.89	DangsuB	UCUGAAGGUGAGAAUCUUGAUGAUGCUGCAUCAGCAAUAAACGACUACCUGAUUUAUCAUUAUGCCAUUGGAACGAUACACAGAUAAUUAGCAUAAUUCAUGUGCAAGAAUGCCACGGGUACAUGGUAUGGUUCAAUUGAUACAGUCGUUGUUUGCGGGUGUAGCAUCAUCAAGAUUCACAUGAAAAGGC
pyr-2974	GUAGCAUCAUCAAGAUUCACA	nta-MIR172c	-51.70	1.10	DangsuB	GUUUGCGGAUGUAGCAUCAUCAAGAUUCACAUGCAAAACGCAUGGUGAUGAAAUGAUAUUAAUGGCCAUGGCAGCUUUUUGAAGGUGAGAAUCUUGAUGAUGCUGCAUCAGCAAUAA
pyr-2974	GUAGCAUCAUCAAGAUUCACA	tcc-MIR172e	-65.50	0.83	DangsuB	UUGACAGUCGUUGUUUGCGGGUGUAGCAUCAUCAAGAUUCACAUGCAAAUGCACGGUGGUGGUGAUGGAUAAUACAAACUCUCUUCUUUUUUUCUCCCCUUCCCCUUUCUUUUCCCUUCUCCUUUAUGCCAAAGUUGUUUGGAAAGUGAGAAUCUUGAUGAUGCUGCAUCGGCAAUAAACGACUAUACA
pyr-2974	GUAGCAUCAUCAAGAUUCACA	aau-MIR172	-59.00	0.88	DangsuB	GCAGAUGUAGCAUCAUCAAGAUUCACAUGCAAAUGCAACAAGUGGAAGUGAGAUUAUUUUUGAAUGAUAGAUGCAACCUUCUAAUCAAAAUCUCUCUCUCUCUCUCUCUCUCUGUGGCCACUUGGUUUCUUUCGGAACUGAGAAUCUUGAUGAUGCUGCAUCAGC
pyr-2974	GUAGCAUCAUCAAGAUUCACA	lus-MIR172a	-46.70	1.14	DangsuB	AGUCGUUGUUUGCUGGCGUAGCAUCAUCAAGAUUCACAUUCCGAACUGGGAUCAUGAGAAUCUUGAUGAUGCUGCAUUGGCCAUAUACGACU
pyr-2974	GUAGCAUCAUCAAGAUUCACA	vun-MIR172	-60.40	1.01	DangsuB	UUCACAGUCGUUGUUUGCGGAUGUAGCAUCAUCAAGAUUCACAUGCAAACGAAGGUGGAUGGGACUGUGAUGCAAUCUAACCGCUCGUCUUUUUGAUGUGAGAAUCUUGAUGAUGCUGCAUCAGCCAUAAACGACUUUAA
pyr-2974	GUAGCAUCAUCAAGAUUCACA	gma-MIR172b	-65.50	0.98	DangsuB	UUGACAGUCGUUGUUUGCGGAUGUAGCAUCAUCAAGAUUCACAUGCAAAUGAAGGUGGGUGGGACUAUGAUGCAAUCCAAGUGCUCUGCCAAUCCAUCGGUCUUUUUGAUGUGAGAAUCUUGAUGAUGCUGCAUCAGCCAUAAACGGCUUUAA
pyr-2974	GUAGCAUCAUCAAGAUUCACA	gma-MIR172a	-65.00	0.88	DangsuB	UUAACAGUCGUUAUUUGCGGAUGUAGCAUCAUCAAGAUUCACAUGCAAGCGCAGGUGGUGGGUGGGACUUGAUGCAAUCUAAGUGCUGUGCCAGCCAAGCCAUAGGUCUUUUGGAACUGAGAAUCUUGAUGAUGCUGCAUCAGCCAUAAACGACUUCAC
pyr-2974	GUAGCAUCAUCAAGAUUCACA	ssl-MIR172	-46.60	1.19	DangsuB	GUGUAGCAUCAUCAAGAUUCACAUGCAAAAAAGCAUGCCAUAUAUAUGAGCUGAGCCCAGCUUUGGAUGGUGAGAAUCUUGAUGAUGCUGCAU
pyr-2974	GUAGCAUCAUCAAGAUUCACA	nta-MIR172i	-47.70	1.16	DangsuB	GUUUGCAGAUGUAGCAUCAUCAAGAUUCACAUAUUAUAAAGGCAUGAUGAUUAACGACCAUGGCCUUUUUGGAGGUGAGAAUCUUGAUGAUGCUGCAUUAGCAAUAAAC
pyr-2974	GUAGCAUCAUCAAGAUUCACA	gma-MIR172f	-60.20	0.94	DangsuB	GCGGAUGUAGCAUCAUCAAGAUUCACAUGCAAACGCAGGUGGUGGGUGGGACUGUGAUGCAAUCUAAGUGCUACUGUGCCAACCAAAGCCAUAGGUCUUUUGGAAGUGAGAAUCUUGAUGAUGCUGCAUCAGC
pyr-2974	GUAGCAUCAUCAAGAUUCACA	mtr-MIR172c	-54.90	1.10	DangsuB	UAUUUGCAGAUGUAGCAUCAUCAAGAUUCACAUAUGAAAGUGCAAAUGGUUUUGUUGGAUUUUGAUCUGAUCGAUGCAAAUCUAAGUUCUCCAUAGGUCUUUUGAACUGAGAAUCUUGAUGAUGCUGCAUCAGCCAUAA
pyr-2974	GUAGCAUCAUCAAGAUUCACA	lja-MIR172b	-56.80	1.11	DangsuB	GGUCGUUAUUUGCAGAUGUAGCAUCAUCAAGAUUCACAUGCAAAUGCAAAUGCAAUCUAAGGCCAAGCCAUAGAUCUUUUGAAGUGAGAAUCUUGAUGAUGCUGCAUCAGCCAUGAACGGCU
pyr-753	AGAAUGUCGUCUGGUUCGAGA	sly-MIR166a	-51.50	1.17	DangsuB	GUUGAGGAGAAUGUCGUCUGGUUCGAGAUCUUUCAUAAGAAAGGUAAAUGAAUGACAAGUUUUCAUAUAUGUAUCGUGAAUGAUUUCGGACCAGGCUUCAUUCCCCUCAAC
pyr-753	AGAAUGUCGUCUGGUUCGAGA	stu-MIR166d	-33.80	0.99	DangsuB	AGAAUGUCGUCUGGUUCGAGAUCUUUCAUAAGAAGGUAACAUGCAAUGAGAUGAUUUCGGACCAGGCUUCAUUCCCC
pyr-3970	GUUAGAGAUAGAGAGAGUGAG	ppe-MIR6281	-85.20	1.09	DangsuA	AAGGAGGUCGAGUGUUAGAGAUAGAGAGAGUGAGUGAGAGACUAACAGUCGAUAUAGAGUGAUGGCGGUGGUGUGAGGCGUAGAACUAAGAGAGUGAUGGCGGUGGUGCGAGACUGUCAGUCUCUCAUUCACUCUCUCUGUCUCUGAUGCUCAAUCUCUU
pyr-2449	UGCCAAAGAAGAUUUGCCCUG	mtr-MIR399k	-39.10	0.95	DangsuB	AAUGAUAGGGGAAAUCUCUUUUGGCAGAGAGGAGUAGCUAGAGAGCUUGAACAUGCUUGCUUCUAGUUUGCCAAAGAAGAUUUGCCCUGCCAUU
pyr-1341	UUAGAUGACCAUCAACAAACA	csi-MIR827	-31.80	0.91	DangsuA	GCUUGUUGAUUGUCAUCUAAUCAUUUUCUUUUUCAUCCGGGCAUUUGAAUGAUUAUAUGGUUAGAUGACCAUCAACAAACAUAUUCAUGGUAUGGCAUGC
pyr-4753	GGCAAGUUGUCCUUGGCUAC	vvi-MIR169c	-57.50	1.20	DangsuB	GGGAGUAGAAUGCAGCCAAGGAUGACUUGCCGGAGAUGGGGCAUUCCUCGUUAAUCCGGCAAGUUGUCCUUGGCUACAUUGGGCUCUCUU
pyr-4753	GGCAAGUUGUCCUUGGCUAC	vvi-MIR169a	-60.60	1.19	DangsuB	GAGAGUGGAAUGCAGCCAAGGAUGACUUGCCGGAAUUUAUAUAUAGUGAGAAGAGAAGAGGCUAUAUGCUUUCACAUAUAUAGUGAACCCUGGCAAGUUGUCCUUGGCUACAUUUGAUUCUCUU
pyr-4753	GGCAAGUUGUCCUUGGCUAC	mes-MIR169g	-41.00	1.00	DangsuB	UAUGCAGCCAAGGAUGACUUGCCGACCAGUGGCCUAUUCAAGAAGAAGCAAAAGACCAAGUUGGCAAGUUGUCCUUGGCUACAUG
pyr-4753	GGCAAGUUGUCCUUGGCUAC	mes-MIR169f	-48.20	1.15	DangsuB	GGUGUAGCCAAGGAUGACUUGCCGGAAAAACUCUCCAUAAAUUUUCUGGUGAUUCAUCUUCGGUUUUUAAUCAGAAUUUCGGCAAGUUGUCCUUGGCUACAUU
pyr-4753	GGCAAGUUGUCCUUGGCUAC	vvi-MIR169d	-46.70	0.95	DangsuB	GAGUGGAAUGCAGCCAAGAAUGAUUUGCCGGAAUUUAUAUAUAGUGAGAAGAGAAGAGGCUAUAGGCUUUCACAUAUAUAGUGAACCCUGGCAAGUUGUCCUUGGCUACAUUUGAUUCUC
pyr-4753	GGCAAGUUGUCCUUGGCUAC	ath-MIR169a	-74.80	1.07	DangsuB	GUGACGAAAGUAGUGUGCAGCCAAGGAUGACUUGCCGAUUUAAAUGAUCUUUCUUUAUACUCUAUUAAGACAAUUUAGUUUCAAACUUUUUUUUUUUUUUUUUUUUGAAGGAUUCAGGAAGAAAUUAGGAUAUAUUAUUCCGUAUAAAAUACAAGAUAUAUAAAACCAAAAAGAAAAAGUAACAUGAUCGGCAAGUUGUCCUUGGCUACACGUUACUUUGUGUCGC
pyr-4753	GGCAAGUUGUCCUUGGCUAC	aly-MIR169a	-88.40	1.00	DangsuB	AACGCGUAUGUGACGAAAGUAGUGUGCAGCCAAGGAUGACUUGCCGAUUUAAAUGAUCUUUCUUUAUACUCUAUUAAGACAUUUUAAGUUUCAAAUUUCUUUGGUUCUUCAAGGAUUAAGGAAGAAAGUAGGCUAUAUAUGUAGAUAUAUAUAUUAUGCUGUAUUAAAUAUAUGUACAAGAUAAGACCAAAAAAGAAAAAGUAACAAUCAUGAUCGGCAAGUUGUCCUUGGCUACACGUUACUUUGUGUCGCGCAUAGGUGUU
pyr-4753	GGCAAGUUGUCCUUGGCUAC	osa-MIR169b	-62.00	1.02	DangsuB	GAACGGAAUGCAGCCAAGGAUGACUUGCCGGUACGUGUAUGCAUGUUUCAAGGUACUAUAUGUGCCCCCAACUGUUUUAGAUCCAUGCUGACAUUUUCCGGCAAGUUGUCCUUGGCUACGUCUUGUUC
pyr-4753	GGCAAGUUGUCCUUGGCUAC	zma-MIR169r	-55.90	0.87	DangsuB	GCAGCCAAGGAUGACUUGCCGGGUAUUUUGAGCAUGCAUGUUACAGGGGAGCAUAUGCAAUCUGUUUGGAAUUUUGAGCCCAUACCGUGCGGUGCCUGUCUUCCGGCAAGUUGUCCUUGGCUACAU
pyr-4753	GGCAAGUUGUCCUUGGCUAC	ata-MIR169d	-55.90	1.02	DangsuB	GAACGGGAUGCAGCCAAGGAUGACUUGCCGGCUCCUGGUGUUGGGAGUUCACUGAGCUUUAGAGUUAGCCGGCAAGUUGUCCUUGGCUACACCUAGUUCUC
pyr-4753	GGCAAGUUGUCCUUGGCUAC	tcc-MIR169e	-52.90	0.90	DangsuB	UAGGCACAGAAAGUGAAGUGCAGCCAAGGAUGACUUGCCGAUUCUUUCUCUUAUAUCCAUUCAGUUUUACCAACACUAGCAACUCAUAUGUAAAGACGAAUUUAAAUCGGCAAGUUGUCCUUGGCUACAUGUUUCUUUUUGCUCCAC
pyr-4758	UGAUUGAGCCGUGCCAAUAU	mtr-MIR171c	-36.50	1.14	DangsuB	AUUGAGAUAUUGGCUUGGUUCACUCAGAAGAAACAAAAAAUAACACUACUUGUGAAUGUUUUGAUUUUGAUUUUGAUUUUGAUUGAGCCGUGCCAAUAUUUCAAA
pyr-4536	UUGACAGAAGAUAGAGGGCAC	cme-MIR156e	-46.70	1.17	DangsuA	ACCUAUGUUGUUGACAGAAGAUAGAGGGCACAGACGAUGAAAUGCAUAUUUGGUGCAUCUCAAUCUUUUGUGCUCUCUAUACUUCUGUCAUCACCUUUUCA
pyr-4536	UUGACAGAAGAUAGAGGGCAC	mtr-MIR156g	-45.70	0.95	DangsuA	GGUUGUUGACAGAAGAUAGAGGGCACUAAGGAUGAUAUGCAUACACAUAUAUAUACAACAUGGAGGAGGAGCUUAAUUGCAUUUCAUUUCCUUUGUGCUCUCUAGACUUCUGUCAUCACC
pyr-707	UGCCAAAGGAGAUUUGCCCUG	ghr-MIR399d	-47.00	1.18	DangsuB	UGAGGAAUUACAGGGCAACUCUCCUUAAGCAAAAAUGGAUGUGCUUUUCUUUGCAUAAUUCGAUUUUGCCAAAGGAGAUUUGCCCUGCCAUUCACUCA
pyr-707	UGCCAAAGGAGAUUUGCCCUG	ath-MIR399a	-51.00	1.16	DangsuB	AAAUGCAUUACAGGGUAAGAUCUCUAUUGGCAGGAAACCAUUACUUAGAUCUUUGCAUCUCUUUAUGCAUUGCUUUUAAUUAGUGAGUUAUCUGCCAAAGGAGAUUUGCCCUGUAAUUCUUCU
pyr-707	UGCCAAAGGAGAUUUGCCCUG	aly-MIR399f	-65.00	1.05	DangsuB	AUGAAAGAUACAUAGAGAAGGUGCAAAUACAUUACAGGGCAAGAUCACCAUUGGCAGAAAUCUAUUACUUCAUUCUUGCAUAAUAUGCAUUAAUGUUUGUGGUGAGCUCUCUGCCAAAGGAGAUUUGCCCUGUAAUUCUCUUGCGCCAAUGUUUUAGAUAUCUUCAU
pyr-707	UGCCAAAGGAGAUUUGCCCUG	mtr-MIR399c	-49.30	1.03	DangsuB	GUUCUGCUGUUGAGGAAUGAUAGGGAAAAUCUCUUUUGGCAGAGAGGAGUAAAAAUCUUAAACAGGAAUGUUUCUGGUUUGCCAAAGGAGAUUUGCCCUGCCAUUUUUGACAGCUAUUG
pyr-707	UGCCAAAGGAGAUUUGCCCUG	cca-MIR399	-35.80	1.08	DangsuB	GUAUUACUGGGCAAUUACUCUUUUAGCAGUUUGUAAGCAACAUGCUACCUCUAACUGCCAAAGGAGAUUUGCCCUGUAAUACA
pyr-707	UGCCAAAGGAGAUUUGCCCUG	mtr-MIR399h	-36.30	0.93	DangsuB	AAUGAUAGAGCAAAUCUCUAUUGGCAGAACGAAGUAGAAAGCUUGGACAUGCAUGCUUCUGGUUUGCCAAAGGAGAUUUGCCCUGCCAUU
pyr-707	UGCCAAAGGAGAUUUGCCCUG	mtr-MIR399i	-29.70	0.78	DangsuB	AAUGAUAGAGCAAAUCUCUAUUAGCAGAACGAAGUAGAAAGCUUGGACAUGCAUGCUUCUGGUUUGCCAAAGGAGAUUUGCCCUGCCAUU
pyr-4000	CAGAAGAUAGAGAGCACAAC	tcc-MIR156f	-52.60	0.97	DangsuA	UACGGAUGAGGACGCUUUUGUUGACAGAAGAUAGAGAGCACAACUGAACAUACCCAGAAAAGGCCUGUGUAUGAGCAGCCUUGUGCUCUCUUUUCUUCUGUCAAUGGAAUUUUCUGUCAGAGUU
pyr-4000	CAGAAGAUAGAGAGCACAAC	rco-MIR156f	-43.30	1.31	DangsuA	UUUUGUUGACAGAAGAUAGAGAGCACAACUUAACAUACCCAACGACAGAUUUGUGUAUGUGAAGUUUUGUGCUCUUUUUUCUUCUGUCAACUUAUAU
pyr-4000	CAGAAGAUAGAGAGCACAAC	pta-MIR156b	-41.30	1.01	DangsuA	GAUGACAGAAGAUAGAGAGCACAACCGCUCAGAUGCCGGCACUCUGCGUUUGAGGUGUAUGUGCUCUCGUUGAUUUUGUCAUC
pyr-4000	CAGAAGAUAGAGAGCACAAC	gma-MIR156c	-45.20	0.54	DangsuA	ACUUGACCACUAGGCUUAUCUCUUUCCGUUUCUGAGCAUGCAUACUCAUUCACAGCAUCAAAAUGCACAGAUCCUGAUGGAGAUUGCACAGGGCAGGUGAUGCUAGAUUGCACCAUACUCAACUCUGGACUUUGUGAUUGAAGUGUUGACAGAAGAUAGAGAGCACAACCUGAGUCAAAGGAUCC
pyr-4000	CAGAAGAUAGAGAGCACAAC	vvi-MIR156f	-44.40	0.94	DangsuA	UUAUGUUCUGUUGACAGAAGAUAGAGAGCACAACUGAACAUACCCAAGAGGGCUUGUGUUUGAGCAGUCUUGUCCUCUCUCUUCUCCUGUCAACAGAACUUGCUG
pyr-3229	GUUCGCGUCGGGUUCACCA	osa-MIR5077	-27.80	0.51	DangsuA	UGCCUUUUCGUUGUUCGCGUCGGGUUCACCAGCUAGGUGGUUCGCCAUGAAGUACAGGAAGGGGGUCGCCGGCGAGUCCAACGAUGACGAC
pyr-2493	UACGCAGGAGAGAUGACGCUGU	gma-MIR4376	-51.80	0.93	DangsuB	AAGGUUUGCUACGCAGGAGAGAUGACGCUGUCCCUUGCACCCAUCCUAGCUUCCCUUGAGUAGGUAAGAGCAAGGCCAGCCAGCAUCAUAUCUCCUGCAUAGUAAACCUU
pyr-2639	UGAAGUGUUUGGGGGAACUC	sbi-MIR395a	-77.00	1.08	DangsuA	GGUUGGUUGGUUGUCACCUGGAGUUCUCCACAAACUACUUCAGUAGCAACACACACCCCUAGUUUAAUGCACCGUGUUUGCAUGUUUGUGUGGAGCUGUGUGUGUACAUAGUGAAGUGUUUGGGGGAACUCUGGGUGGCAAUCAGCAAUU
pyr-2639	UGAAGUGUUUGGGGGAACUC	sbi-MIR395j	-42.80	1.10	DangsuA	GUUCCCUUCAAGCACUUCACAUGAAGCUCUUUGCAUUAUAUUGGCGGAUGUAGCAUUGAGACCAAUGUGAAGUGUUUGGGGGAACUC
pyr-2639	UGAAGUGUUUGGGGGAACUC	sbi-MIR395c	-40.50	1.23	DangsuA	GAGUUCCCUACAAGCACUUCACGAGACCUUGGCUUAAUAAAGGGUUGUUUGUGAAGUGUUUGGGGGAACUCUU
pyr-2639	UGAAGUGUUUGGGGGAACUC	sbi-MIR395b	-50.00	1.06	DangsuA	GUUAGGUUUGGUGUCCCUAGGAGUUCUCUGCAAGCACUUCACGAGGCAUCGUUUUGAGAGCUUUUGUGAAGUGUUUGGGGGAACUCUUAGUGUCACAAAUCAUUU
pyr-2639	UGAAGUGUUUGGGGGAACUC	zma-MIR395o	-95.70	1.00	DangsuA	AGUUCUCUUCAAGCACUUCACGAGGCAUCACACUGAGAGCUUUUGUGAAGUGUUUGGGGGAACUCUUGGUGUCACAAAUCAUUUGCAUUUGCUUGAUGUUAGUCAUGCACCAUGUGAUAUGAGAUAAAGGACAUGGCAACGUUUUGUGUUACUAGGAGUUCCCUACAAGCACUUCAUGAGACCUUGACUUAAUAAAGGGCCAUUGUGAAGUGUUUGGGUGAACUCU
pyr-2639	UGAAGUGUUUGGGGGAACUC	sbi-MIR395g	-35.40	1.07	DangsuA	GUUCCCUAAAAGCACUUCACGAGACCUUGGCUUAAUAAAGGGCCCUUGUGAAGUGUUUGGGGGAACUC
pyr-2639	UGAAGUGUUUGGGGGAACUC	zma-MIR395j	-38.60	1.07	DangsuA	AGUUCCCUUCAAGCACUUCACAUGAGGCACCAUUCAAAUAACACAUUUCAAGAUUAGGUGCAUGUGAAGUGUUUGGGGGAACUCU
pyr-2639	UGAAGUGUUUGGGGGAACUC	zma-MIR395i	-39.90	1.25	DangsuA	AGUUCCCUACAAGCACUUCACGAUACCUUGGCUUAAUAAAGGCCAGUUGUGAAGUGUUUGGGGGAACUCU
pyr-2639	UGAAGUGUUUGGGGGAACUC	sbi-MIR395f	-59.40	1.24	DangsuA	ACAAUGUUUGGUGUUACCACGAGUUCCCUUCAAGCACUUCAUGAGGCACCAUUAAAUAACUCUAUUUAAGAUUAGGUGUAAUAUGAAGUGUUUGGGGGAACUCUUGGUGAUACUCAACAUCG
pyr-2639	UGAAGUGUUUGGGGGAACUC	zma-MIR395g	-29.00	1.00	DangsuA	AGUUCUAUGCAAGCACUUCACGAGGCAUUGUUUCAAGAGCUUUUGUGAAGUGUUUGGGGGAACUCU
pyr-2639	UGAAGUGUUUGGGGGAACUC	zma-MIR395f	-25.50	0.80	DangsuA	AGUUACCUACAAGCACGUCUCGAUACCUUGGCUUAAUAAAGGCCAGUUGUGAAGUGUUUGGGGGAACUCU
pyr-2639	UGAAGUGUUUGGGGGAACUC	zma-MIR395e	-38.60	1.07	DangsuA	AGUUCCCUUCAAGCACUUCACAUGAGGCACCAUUCAAAUAACACAUUUCAAGAUUAGGUGCAUGUGAAGUGUUUGGGGGAACUCU
pyr-2639	UGAAGUGUUUGGGGGAACUC	zma-MIR395d	-29.00	1.00	DangsuA	AGUUCUAUGCAAGCACUUCACGAGGCAUUGUUUCAAGAGCUUUUGUGAAGUGUUUGGGGGAACUCU
pyr-2639	UGAAGUGUUUGGGGGAACUC	sbi-MIR395e	-48.80	1.00	DangsuA	AUUAGGUUUGGUGUCCCCGGGAGUUCUCUGCAAGCACUUCACGAGGCACUAUUUUGAGAGCUUUUGUGAAGUGUUUGGGGGAACUCUUGAUGCCACUAACCAUUU
pyr-2639	UGAAGUGUUUGGGGGAACUC	zma-MIR395a	-78.20	1.04	DangsuA	UAUUGGUUGGUUGUCACCUGGAGUUCUCCUCAAACCACUUCAGUUGCUGCACCUAGCUAGUUUAAUGGCACUGUGCUUGCGUGCAAGCGGCCGGAGCUGUGUGUAGCUAGUGAAGUGUUUGGGGGAACUCUGGGUGUCAAUCAGCAAUU
pyr-2639	UGAAGUGUUUGGGGGAACUC	sbi-MIR395d	-50.20	1.12	DangsuA	UCAAGUUUGGUGUCCCCAGGAGUUCUCUGCAAACACUUCACAAAGCACUUUUUUAGAGCUUUUGUGAAGUGUUUGGGGGAACUCUUGGUGCCACUGAUCAUUU
pyr-2639	UGAAGUGUUUGGGGGAACUC	zma-MIR395p	-37.40	1.04	DangsuA	AGUUCCCUUCAAGCACUUCACAUGAGGCACCAUUCAAAUGACAACUCCAUUUAAGAUUAUGUGUAAUGUGAAGUGUUUGGGGGAACUCU
pyr-2639	UGAAGUGUUUGGGGGAACUC	zma-MIR395n	-34.20	1.10	DangsuA	AGUUCUCUACAAGCACUUCACGAGGCUUCGUACUGAGAGCUUUUGUGAAGUGUUUGGGGGAACUCU
pyr-2639	UGAAGUGUUUGGGGGAACUC	zma-MIR395b	-58.80	1.25	DangsuA	GCAACGUUUUGUGUUACUAGGAGUUCCCUACAAGCACUUCACAAUACCUUGGCUCAAUAAAUUAAAGGCCAGUUGUGAAGUGUUUGGGGGAACUCUUGGUAUCAUGAAGCAUUU
pyr-2639	UGAAGUGUUUGGGGGAACUC	osa-MIR395p	-37.30	1.10	DangsuA	GAGUUCCCUUCAAGCACUUCACGUGGCACUAUUUCAAUGCGUACCGUGUGAAGUGUUUGGGGGAACUC
pyr-2639	UGAAGUGUUUGGGGGAACUC	osa-MIR395q	-36.20	1.29	DangsuA	GAGUUCCCUUCAAGCACUUCACAUGACACUAUUUCAAUGUCUAUUAUGUGAAGUGUUUGGGGGAACUC
pyr-2639	UGAAGUGUUUGGGGGAACUC	osa-MIR395r	-32.50	1.02	DangsuA	GAGUUCCCUUCAACCACUUCACGUGGCACUAUUUUAGGACCUACUAUGUGAAGUGUUUGGGGGAACUC
pyr-2639	UGAAGUGUUUGGGGGAACUC	osa-MIR395s	-42.00	1.02	DangsuA	GUAUCACCGUGAGUUCCCUUCAAGCACUUCACGUGGCACUAUUUCAAUGCCUAUUGUGAAGUGUUUGGGGGAACUCUCGAUGUUCC
pyr-2639	UGAAGUGUUUGGGGGAACUC	osa-MIR395y	-48.80	0.98	DangsuA	UGGCCCCAGGAGUUCCUUGCAAGCACUUCACAUAGAACUUCAGUUACUCUCAUACAACAUUGUGAUUUUGAGAAGCUAUUGUGAAGUGUUUGGGGGAACUCUCGGUGCCA
pyr-2639	UGAAGUGUUUGGGGGAACUC	zma-MIR395h	-38.60	1.07	DangsuA	AGUUCCCUUCAAGCACUUCACAUGAGGCACCAUUCAAAUAACACAUUUCAAGAUUAGGUGCAUGUGAAGUGUUUGGGGGAACUCU
pyr-2639	UGAAGUGUUUGGGGGAACUC	sbi-MIR395i	-44.70	1.02	DangsuA	GUUCCCUGCAAACACUUCACAAGCUAGACCAUAUAUAGUAUGCCCUUGCACAAUGUGGUAUCCAGUUACCUAGCUAGUGAAGUGUUUGGGGGAACUC
pyr-2639	UGAAGUGUUUGGGGGAACUC	osa-MIR395b	-45.40	1.11	DangsuA	GAGUCCCUAGGAGUUCCUUUCAAGCACUUUACGACACACUGUAUUGAGAGUUGUCGUGAAGUGUUUGGGGGAACUCUUAGUGUCGC
pyr-2639	UGAAGUGUUUGGGGGAACUC	osa-MIR395d	-45.50	1.11	DangsuA	GUAUUGUCGUGAGUUCCCUUCAAGCACUUCACGUGGCACUAUCUCAAUGCCUACUAUGUGAAGUGUUUGGGGGAACUCUCGAUAUCAC
pyr-2639	UGAAGUGUUUGGGGGAACUC	osa-MIR395e	-45.10	1.10	DangsuA	GUAUUAUCGAGAGUUCCCUUCAACCACUUCACGUGGCACUGUUUCAAGGCCUAUUGUGUGAAGUGUUUGGGGGAACUCUCGAUAUCAC
pyr-2639	UGAAGUGUUUGGGGGAACUC	osa-MIR395h	-56.90	1.07	DangsuA	UUGUUACCUGGAGUUUCCUCAACACACUUCACAUCUGCUAGGCCCUAUUACAAUUGCGCAAUGUGGAGUCUGCAAUUGGUAGUGAAGUGUUUGGGGGAACUCUAGGUGGCAC
pyr-2639	UGAAGUGUUUGGGGGAACUC	osa-MIR395i	-47.20	1.10	DangsuA	GUUUUACCGGGAGUUCUCUUCAAGCACUUCACGUAGAGCUUUCUAUUGACAUGGAGCUUUAGAACAAUGUGAAGUGUUUGGGGGAACUCUUGGUACCAA
pyr-2639	UGAAGUGUUUGGGGGAACUC	osa-MIR395j	-52.40	1.03	DangsuA	GUGUUCCCAAGAGUUCCUUGCAAGCACUUCACAUAGAACUUCUGUUACUCUCAUGUAACAUUGGGAACUUGAGAAGCUACUGUGAAGUGUUUGGGGGAACUCUAGGUGGCAC
pyr-2639	UGAAGUGUUUGGGGGAACUC	osa-MIR395k	-46.00	1.12	DangsuA	GUUUUAUCGGGAGUUUCCUUCAAGCACUUCACGUAGAGCUUUCUAUUGAUAUGGAGCUUUGGAACAAUGUGAAGUGUUUGGGGGAACUCUUGAUACCAA
pyr-2639	UGAAGUGUUUGGGGGAACUC	osa-MIR395l	-43.30	1.11	DangsuA	GCGUUCCUUCCAAGCACUUCACACAGAGCUUUUAUUUCUCUCACAUCGAUUGAGAACUUAAUUAGAAGCUUUUGUGAAGUGUUUGGGGGAACUC
pyr-2639	UGAAGUGUUUGGGGGAACUC	osa-MIR395m	-57.60	1.13	DangsuA	GAGUUCUCCUCAAAUCACUUCAGUAGAUAGCUAGCUAGGCUUCAUUGCAUUACACUGUUACAAAACUGUGAGCAUGGGGCCAAAAGCUAGUUGUAUAUAGUGAAGUGUUUGGGGGAACUC
pyr-2639	UGAAGUGUUUGGGGGAACUC	osa-MIR395n	-39.60	1.28	DangsuA	GAGUUCCCUUCAAGCACUUCACGACGCACUAUUUAGAGAGUUGUUGUGAAGUGUUUGGGGGAACUC
pyr-2639	UGAAGUGUUUGGGGGAACUC	mtr-MIR395a	-52.30	1.07	DangsuA	UUUUUGUUGAUUGUUUCUUAGAGUUCCUUUGAACGCUUCAUGCAUGAGAAUAUGUAUUUGGUCUAAUAUCCAUUAGAAAAGAUAGUUCUUCAUCAAUGAAGUGUUUGGGGGAACUCUUGGGUUCAACCAGCACCA
pyr-2639	UGAAGUGUUUGGGGGAACUC	mtr-MIR395c	-42.50	1.21	DangsuA	GAGUUCCUUUGAACGCUUCAUGCAUGAGAAUAUCUAUUUGGUCUAAUAUCCAUUAGAAAAGAUAGUCUUUUCUUCUAUGAAGUGUUUGGGGGAACUC
pyr-2639	UGAAGUGUUUGGGGGAACUC	mtr-MIR395d	-40.20	1.22	DangsuA	GAGUUCCUUUGAACGCUUCAUGCAUGAGAAUAUCUAUUUGGUCUAAAAUCCAUUAGAAAAAUAGUUCUUCUUAAAUGAAGUGUUUGGGGGAACUC
pyr-2639	UGAAGUGUUUGGGGGAACUC	mtr-MIR395e	-46.10	1.32	DangsuA	GAGUUCCUUUGAACGCUUCAUGCAUGAGAAUAUCUAUCUAUUUGGUUUAAAAUCCAUUAGGAUAGAUAGUUCUUCUUAAAUGAAGUGUUUGGGGGAACUC
pyr-2639	UGAAGUGUUUGGGGGAACUC	mtr-MIR395f	-37.50	1.10	DangsuA	GAGUUCCUUUGAACGCUUCAUGCAUGAGAAAUAUCUCUUUGGUUUAAAAUCCAUUAGAAAAGAUAGUAUUUUCUUCUAUGAAGUGUUUGGGGGAACUC
pyr-2639	UGAAGUGUUUGGGGGAACUC	mtr-MIR395i	-30.00	1.03	DangsuA	GAGUUCCUCUGAAUGCUUCAAUCAUGAGACAAUCUAUAUGAAUAGUUCUUGUUCAAUGAAGUGUUUGGGGGAACUC
pyr-2639	UGAAGUGUUUGGGGGAACUC	mtr-MIR395j	-33.00	1.10	DangsuA	GAGUUCCUCUGAAUGCUUCAAACAUGAGACAAUCUAUAUGGAUAGUUCUUGUUCAAUGAAGUGUUUGGGGGAACUC
pyr-2639	UGAAGUGUUUGGGGGAACUC	mtr-MIR395l	-39.10	1.06	DangsuA	GAGUUCCUUUGAACGCUUCAUGCAUGAGAAUAUCUAUCUAUUUGGUCUAAAGUCCAUUAGAAAAGAUAGCCAUUUUUUCAAUGAAGUGUUUGGGGGAACUC
pyr-2639	UGAAGUGUUUGGGGGAACUC	mtr-MIR395m	-41.10	1.17	DangsuA	GAGUUCCUUUGAACGCUUCAUGCAUGAGAAUAUCUAUCUAUUUGGUCUAAAAUCCAUUAGAAAAGAUAGUUCUUCUUAAAUGAAGUGUUUGGGGGAACUC
pyr-2639	UGAAGUGUUUGGGGGAACUC	mtr-MIR395n	-39.10	1.06	DangsuA	GAGUUCCUUUGAACGCUUCAUGCAUGAGAAUAUCUAUCUAUUUGGUCUAAAGUCCAUUAGAAAAGAUAGCCAUUUUUUCAAUGAAGUGUUUGGGGGAACUC
pyr-2639	UGAAGUGUUUGGGGGAACUC	mtr-MIR395o	-32.40	0.95	DangsuA	GAGUUCCUCUGAACUCUUCAUCUAAAGGGCUAUAGCAAGAAAGAAAGGAAAAUCCUUGUAUGAUGAAGUGUUUGGGGGAACUC
pyr-2639	UGAAGUGUUUGGGGGAACUC	osa-MIR395g	-41.70	1.04	DangsuA	GUAUCACCGUGAGUUCCCUUCGAACACUUCACGUGGCACUAUUUCAAUGCCUAUUGUGAAGUGUUUGGGGGAACUCUCGAUGUCAU
pyr-2639	UGAAGUGUUUGGGGGAACUC	sbi-MIR395h	-37.00	1.06	DangsuA	GUUCCCUUCAAGCACUUCACAUGAGGCACCAUUCAAACUCUGUUUAAGAUUAGGUGUAAUGUGAAGUGUUUGGGGGAACUC
pyr-2639	UGAAGUGUUUGGGGGAACUC	gma-MIR395j	-54.10	0.93	DangsuA	UCUGUUGGCUGUCCCUUGGAGUUCCUCUGAACGCUUCAUGUUAGUGAGGGGGGUAGCCAAUGUAAACUGGUACCCAUUAUAAGCCUUAUUCAAUGAAGUGUUUGGGGGAACUCUUGGGUUCAAACU
pyr-2639	UGAAGUGUUUGGGGGAACUC	gma-MIR395k	-52.00	1.02	DangsuA	UUGUUGGCUGACUCUUGGAGUUCCUCUGAACGCUUCAUAUGAGAGGCUACCUAGUAAAAAAAUCUUUCAUUAGUAAAGAUAGUCCUUCUUCAAUGAAGUGUUUGGGGGAACUCCGGGAUUCAACUA
pyr-2639	UGAAGUGUUUGGGGGAACUC	gma-MIR395l	-56.50	0.93	DangsuA	UUUUCUGUUGGCUGUCCUUUGGAGUUCCUCUGAACGCUUCAUGUUAGUGAGGGGGGUAGCCAGUGUAAACUGGACUGGUACCCAUUAUUAUAAGCCUUCUUAUGAAGUGUUUGGGGGAACUCUUGGGUUCAACU
pyr-2639	UGAAGUGUUUGGGGGAACUC	gma-MIR395i	-48.10	0.87	DangsuA	CUGUUGGCUGUCUCCUGCAGUUCCUCUGAACGCUUCAUGUGAGGGGCUAGCAAGUGUAUACGUUAUAAUUUAGCCUUCUUCAAUGAAGUGUUUGGGGGAACUCUUGGGCUCAACCA
pyr-2639	UGAAGUGUUUGGGGGAACUC	gma-MIR395m	-45.50	1.03	DangsuA	CUUUCUGUUGGUUGUCUCUUGGAGUUCCUCUGAACGCUUCAUGUGAUUGGCUAGUUAUAGGCCUUUGAUGAAGUGUUUGGGGGAACUCUUAGGUUCAACU
pyr-2639	UGAAGUGUUUGGGGGAACUC	bdi-MIR395l	-50.10	1.04	DangsuA	GUUUGGUAUUAUCAUGAGUUCCCUGCAAGCACUUCACGAGGCACUAUCCCAAGGGCUACUGUGAAGUGUUUGGGGGAACUCUUGGUGUCACCAAGC
pyr-2639	UGAAGUGUUUGGGGGAACUC	bdi-MIR395m	-41.50	0.92	DangsuA	UGGUAUUACCAUGAGUUCCUUUGCAAGCAUUUCACGUACGAGGCACUAUCCCAAGGGCUAUUGUGAAGUGUUUGGGGGAACUCUUGGUGUCACCA
pyr-2639	UGAAGUGUUUGGGGGAACUC	bdi-MIR395n	-46.60	1.04	DangsuA	UGGUAUUACCAUGAGUUCCCUGCAAGCACUUCACCAUGCACUACCCCAAGGGCUAUUGUGAAGUGUUUGGGGGAACUCUUGGUGUCACCA
pyr-2639	UGAAGUGUUUGGGGGAACUC	bdi-MIR395o	-39.20	1.09	DangsuA	UAUUAUCAUGAAUUCCCUACAAGCACUUCACAAGAAGCUAUUCCUAGGGCUAUUGUGAAGUGUUUGGGGGAACUCUUGAUGUCACC
pyr-2639	UGAAGUGUUUGGGGGAACUC	bdi-MIR395h	-47.30	1.18	DangsuA	ACCAUGAGUUCCCUGCAAGCACUUCACGAGGCCGUUUUCUGAGGGCUACUGUGAAGUGUUUGGGGGAACUCUUGGU
pyr-2639	UGAAGUGUUUGGGGGAACUC	bdi-MIR395j	-45.70	0.99	DangsuA	GGUAUUCUCAUGAGUUUCCCGCAAGCACUUCACGAGGCCGUUUUCUGAGGGCUACUGUGAAGUGUUUGGGGGAACUCUUGGUCUCACC
pyr-2639	UGAAGUGUUUGGGGGAACUC	bdi-MIR395k	-49.20	1.14	DangsuA	GUACUACCAUGAGUUCCCUGCAAGCACUUCAUGAGGCCCAAUUCUGAGGGCUACUGUGAAGUGUUUGGGGGAACUCUUGGUGUUAC
pyr-2639	UGAAGUGUUUGGGGGAACUC	bdi-MIR395e	-78.40	1.02	DangsuA	GUUGGUUGUCACCUGGAGUUCUCCUCAAAUCACUUCAGUAGCUAGCUAGCUUGUGCCUCCUUGUUGCAUUGCCACUGUUUUAUAAGUGUGCUUGGGGCCAGAGAGCUGUGCACAGUGAAGUGUUUGGGGGAACUCUGGGUGGCAACCAGC
pyr-2639	UGAAGUGUUUGGGGGAACUC	bdi-MIR395f	-58.00	1.26	DangsuA	GUUUGGUGUCCCCGGGAGUUCCCUUCAAACACUUUACGAAGCAUCUUUCUAAGACUAUUUGUGAAGUGUUUGGGGGAACUCUCGGUGUCACCAAGC
pyr-2639	UGAAGUGUUUGGGGGAACUC	bdi-MIR395g	-49.30	1.20	DangsuA	GGUGUUACCAGGAGUUUCCUGCAAACACUUCACGAGUGCCUAUUUUAAUGGGUUGUUGUGAAGUGUUUGGGGGAACUCUUGAUGUCACC
pyr-2639	UGAAGUGUUUGGGGGAACUC	bdi-MIR395a	-79.80	0.91	DangsuA	CAGGAGAUGAAUGGUUGGUUGUCAACUGGAGUUCUCCUCAAAUCACUUCAGUAGCUAGCUAGCUAGCUUGUGCCUCAUUGUUUCAUUGCCGCUGUUUAUAAGUGUGCAUGGAGCUGGAGAGCCGUGCACAGUGAAGUGUUUGGGGGAACUCCGGGUGGCAACCAACAAUACUGAUAUCACC
pyr-2639	UGAAGUGUUUGGGGGAACUC	bdi-MIR395b	-54.10	0.97	DangsuA	CGGACCACGUUUGGUAUUACCAUGAGUUCCCUGCAAGCACUUCACGAGGCCCAAUUAUGAUGGCUACUGUGAAGUGUUUGGGGGAACUCUUGGUGUCACCAAGCUUACACAAAUAAAAAGA
pyr-2639	UGAAGUGUUUGGGGGAACUC	bdi-MIR395c	-61.80	1.03	DangsuA	GGCGGCAGACCACGUUUGGUAAUACCAUGAGUUCCCUGCAAGCACUUCAUGAGGCCUAAUUCUAAGGGCUACUGUGAAGUGUUUGGGGGAACUCUUGGUGUUACCAAGCUUUUACAACAAAAGGAG
pyr-2639	UGAAGUGUUUGGGGGAACUC	tae-MIR395a	-35.80	1.05	DangsuA	CUUACAGUGGGUUCCUUGCAAGCACUUCAUGAGGCAUUAUUAAAAAUGCCACUGUGAAGUGUUUGGGGGAACUCUUG
pyr-2639	UGAAGUGUUUGGGGGAACUC	bdi-MIR395q	-38.20	1.06	DangsuA	AAUUAUCAUGAGUUCCUUGCAAGCACUUCAUGAGGCACUAUCCCAAGGGCUACUAUGAAGUGUUUGGGGGAACUCUUGAUAUCA
pyr-2639	UGAAGUGUUUGGGGGAACUC	ata-MIR395c	-66.90	1.06	DangsuA	GUCACCUGGAGUUCUCCUCAAAUCACUUCAAUUGCUAGCUUAUGCCUAAUUGUUGCAUUGGCACUGUUUUAAAGUGUGCAUUGCAGGGAUAAGAGAGGCGUGCAUAGUGAAGUGUUUGGGGGAACUCUGGGUGGCAA
pyr-2639	UGAAGUGUUUGGGGGAACUC	ata-MIR395b	-75.20	0.74	DangsuA	CUUACUGCGGGUUCCCUGCAAACACUUCACGAAGCAUUAUUUCAAACGCCAUUGCGAAGUGUUUGGAGGAACUCUUGGUGAAGUCAAGCUCCAAGAACUAAGAAGGUGAUCAAUACGAAGCAUGUUUGGUCUUACCGUGGGUUCCCUACGAGCACUCCACGAGGCAUUAUUCCAAAUACCACUGUGAAGUGUUUGGGGGAACUCUUGGUGAUGC
pyr-2639	UGAAGUGUUUGGGGGAACUC	ata-MIR395e	-45.20	1.13	DangsuA	CUUACCGUGGGUUCCUUACAAGCACUUCACGAGGCAUUAUUACAAAUGCCACUGUGAAGUGUUUGGGGGAACUCUUGGUGAUGC
pyr-2639	UGAAGUGUUUGGGGGAACUC	ata-MIR395d	-90.20	0.93	DangsuA	GUAUUACUGGGAGUUCCCUUCAAGCACUUUACGAACUACUUUUUUAAGGUAUUAUGUGAAGUGUUUGGGGAACUCUUGGUGCAACUAAGCACUUAAAAGAUAUUGCAAGUCAUAAACCACACGAGAUGUACUGCAAAUCCCGUUUGGUAUCACUGGGAAUUCCUUUCAAACACUUUACGGAUCACCUUUCUCAGGGCUCAUGUGAAGUGUUUGGGGGAACUCUCGGUGUAAC
pyr-2145	GGGAAUCUUGAUGAUGCUGCA	cpa-MIR172a	-69.50	0.87	DangsuB	GAGCAUCAUCAAGAUUCACAAAAUUAAACACAUUAGGGCUAGUAGUGUGGGGUUUGUGGUGGUGGGUGACGGUGAUGGCCCCUUCUGCUCUUUUUUUUUUCAGUGGUCCCGUUGCUUAUUUCACUGCAACACCCUUGGCUCUCUCUCUUUGAUUAUGGGAAUCUUGAUGAUGCUGCA
pyr-2145	GGGAAUCUUGAUGAUGCUGCA	cpa-MIR172b	-37.00	0.90	DangsuB	CGGCAUCAUCAAGAUUCACAACAAAACUUUUGUGAUGAUAAGCUCUUUUUAAUCGAUCGACUUGAUCAAAAGCUUCUCUCCGAAAUGGGAAUCUUGAUGAUGCUGCA
pyr-1118	CAGAAGAUAGAGAGCACAUC	pta-MIR156a	-36.20	0.86	DangsuA	GAUGACAGAAGAUAGAGAGCACAUCCGCUCACAUGCCGGGACUCUGCGUUUGAGGUGUAUGUGGUCUCCAUGAUUCUGUCAUC
pyr-1118	CAGAAGAUAGAGAGCACAUC	mtr-MIR156f	-48.70	1.28	DangsuA	GUUUGUUGACAGAAGAUAGAGAGCACAUCUGAACAAACACAAAAGACAUUGUGUUUGAACAGUUGUGUGCUCUCUGCUCUUCUGCCAACAUACU
pyr-1816	UUGUGUUCUCAGGUCACCCCU	ssl-MIR398	-37.20	1.09	DangsuB	GAAGAGUGAUGCUGAGAACACAUGUGGAUUACUGGAUGCAUUAGUCCACUUGUGUUCUCAGGUCACCCCUC
pyr-1816	UUGUGUUCUCAGGUCACCCCU	stu-MIR398b	-38.00	1.03	DangsuB	GAGUGUGCCUUAGAACACAGGUGUAUUUUGGUCUACUCCUGUUUUGGACCCAAAAUAUGCUUGUGUUCUCAGGUCACCCCU
pyr-515	CGUGGUAUCAGAGUCAUGUUA	ppe-MIR1511	-36.70	1.11	DangsuB	AUCGUGGUAUCAGAGUCAUGUUAUUUGCAUGUUGCCACCACAUAUGUGUUGCUCAUAUAAAUAACCUGGCUCUGAUACCAUAAC
pyr-1421	AAGUUGACGGAAGGACUACAU	ptc-MIR6441	-59.00	1.28	DangsuA	CAGCAAUGUAGUCCUUCCGUCAACUUUGAGAUACGUGUUACACUUCUGCAUGUCACGUGACCACGCUGUCAAAGUUGACGGAAGGACUACAUUGCUG
pyr-1731	UGAUUGAGCCGCGCCAAUAUCU	bna-MIR171f	-40.30	0.77	DangsuB	ACGAAAGAGUCCUCUUUGAUAUUGGCCUGGUUCACUCAGAUCUUCCAGAUUACACACGUACUAUAUACAUUCUCUCAGUUAUCUGAUUGAGCCGCGCCAAUAUCUCAGUGCUCUCUCGU
pyr-1731	UGAUUGAGCCGCGCCAAUAUCU	bna-MIR171g	-30.10	0.89	DangsuB	GAUAUUGGCCUGGUUCACUCAGAUUACACACGUACUAUAUGCAUUCUCUUAGUUAUCUGAUUGAGCCGCGCCAAUAUCUC
pyr-1731	UGAUUGAGCCGCGCCAAUAUCU	aly-MIR171a	-53.30	0.66	DangsuB	UCGUUUUUUAUAUUGUUUUCCUUUGAUCUAUCACUUAAGCACGAGAGAGUCCCUUUGAUAUUGGCCUGGUUCACUCAGAUCUUCCCUGACCACACUCACGUCGUACAUAUGCAUUCUCUCUAGAUUAUCUGAUUGAGCCGCGCCAAUAUCUCAGUACUCUCUCGUCUCUAUUUUGGACUUUGUGAUCUUGUAAAUCGA
pyr-1731	UGAUUGAGCCGCGCCAAUAUCU	osa-MIR171a	-45.40	1.08	DangsuB	GGAAAGAGCGAUAUUGGUGAGGUUCAAUCCGAUGAUUGGUUUUACAGCAGUGGUAAAAUCAGUAUCUGAUUGAGCCGCGCCAAUAUCUCUUCCUCU
pyr-1731	UGAUUGAGCCGCGCCAAUAUCU	bra-MIR171e	-40.30	0.77	DangsuB	ACGAAAGAGUCCUCUUUGAUAUUGGCCUGGUUCACUCAGAUCUUCCAGAUUACACACGUACUAUAUACAUUCUCUCAGUUAUCUGAUUGAGCCGCGCCAAUAUCUCAGUGCUCUCUCGU
pyr-1731	UGAUUGAGCCGCGCCAAUAUCU	zma-MIR171n	-36.70	1.22	DangsuB	AUAUUGGUGAGGUUCAAUCCGAUGUUAGGUUUUACAAAAGCUGUAAAAUCAGUAUCUGAUUGAGCCGCGCCAAUAUCU
pyr-1731	UGAUUGAGCCGCGCCAAUAUCU	mdm-MIR171e	-59.80	0.88	DangsuB	UGAAAUAGUUACUGUGAUGUUGGCCCGGUUUCACUCAGAGAGGAAGACUGCUUACUGCUGCAUCUGCAUGUACGUAGGAACGUACGUUGUGGUUGGUCUCCUGAAUCUGAUUGAGCCGCGCCAAUAUCUCAGUGCUCUUUCA
pyr-1731	UGAUUGAGCCGCGCCAAUAUCU	mdm-MIR171c	-52.40	0.94	DangsuB	UACUGUGAUGUUGGCCCGGUUCACUCAGAGAAGAAGACUACUUACUGCAUUUGCAUGUACGUAGAUACGUACGUUGUUCUAUGGUCACCUGAAUCUGAUUGAGCCGCGCCAAUAUCUCAGUG
pyr-1731	UGAUUGAGCCGCGCCAAUAUCU	cme-MIR171e	-38.70	0.88	DangsuB	CUAUGAUAUUGGUCCGGUUCACUCAGAUCACUACCCUAAAUUGACUAGGGUUUCAUUUGAAGUUUAAAUUGAGUCUGAUUGAGCCGCGCCAAUAUCUCAGUGCUCU
pyr-1731	UGAUUGAGCCGCGCCAAUAUCU	ath-MIR171a	-45.00	0.85	DangsuB	AUGAGAGAGUCCCUUUGAUAUUGGCCUGGUUCACUCAGAUCUUACCUGACCACACACGUAGAUAUACAUUAUUCUCUCUAGAUUAUCUGAUUGAGCCGCGCCAAUAUCUCAGUACUCUCUCGU
pyr-1731	UGAUUGAGCCGCGCCAAUAUCU	tcc-MIR171a	-38.20	0.78	DangsuB	UUAGGCACCUACCUACACUAGGUAUUGACACGGUUCAACCUCACCGUAAUGUCAAUGAACUAACUCGACUUUAUGGUUUGAUUGAGCCGCGCCAAUAUCUUGUGCUUUUUACCUUAAUU
pyr-1731	UGAUUGAGCCGCGCCAAUAUCU	bdi-MIR171a	-49.10	0.62	DangsuB	GAGGUAGGAGGCGGAGCGGAGGAAAGGCUUCCCGACCGGGGGAAGCUGGUGAUUGAGCCGCGCCAAUAUCUCUCGCGCGCCAGUGGAAUUGCCGGCUUCAGCUGCUUUCGCCGCCGCAGC
pyr-1557	GUGAAGUGUUUGGGGGAACUC	osa-MIR395p	-37.30	1.10	DangsuA	GAGUUCCCUUCAAGCACUUCACGUGGCACUAUUUCAAUGCGUACCGUGUGAAGUGUUUGGGGGAACUC
pyr-1557	GUGAAGUGUUUGGGGGAACUC	osa-MIR395q	-36.20	1.29	DangsuA	GAGUUCCCUUCAAGCACUUCACAUGACACUAUUUCAAUGUCUAUUAUGUGAAGUGUUUGGGGGAACUC
pyr-1557	GUGAAGUGUUUGGGGGAACUC	zma-MIR395h	-38.60	1.07	DangsuA	AGUUCCCUUCAAGCACUUCACAUGAGGCACCAUUCAAAUAACACAUUUCAAGAUUAGGUGCAUGUGAAGUGUUUGGGGGAACUCU
pyr-1557	GUGAAGUGUUUGGGGGAACUC	osa-MIR395r	-32.50	1.02	DangsuA	GAGUUCCCUUCAACCACUUCACGUGGCACUAUUUUAGGACCUACUAUGUGAAGUGUUUGGGGGAACUC
pyr-1557	GUGAAGUGUUUGGGGGAACUC	osa-MIR395s	-42.00	1.02	DangsuA	GUAUCACCGUGAGUUCCCUUCAAGCACUUCACGUGGCACUAUUUCAAUGCCUAUUGUGAAGUGUUUGGGGGAACUCUCGAUGUUCC
pyr-1557	GUGAAGUGUUUGGGGGAACUC	zma-MIR395o	-95.70	1.00	DangsuA	AGUUCUCUUCAAGCACUUCACGAGGCAUCACACUGAGAGCUUUUGUGAAGUGUUUGGGGGAACUCUUGGUGUCACAAAUCAUUUGCAUUUGCUUGAUGUUAGUCAUGCACCAUGUGAUAUGAGAUAAAGGACAUGGCAACGUUUUGUGUUACUAGGAGUUCCCUACAAGCACUUCAUGAGACCUUGACUUAAUAAAGGGCCAUUGUGAAGUGUUUGGGUGAACUCU
pyr-1557	GUGAAGUGUUUGGGGGAACUC	zma-MIR395n	-34.20	1.10	DangsuA	AGUUCUCUACAAGCACUUCACGAGGCUUCGUACUGAGAGCUUUUGUGAAGUGUUUGGGGGAACUCU
pyr-1557	GUGAAGUGUUUGGGGGAACUC	tae-MIR395a	-35.80	1.05	DangsuA	CUUACAGUGGGUUCCUUGCAAGCACUUCAUGAGGCAUUAUUAAAAAUGCCACUGUGAAGUGUUUGGGGGAACUCUUG
pyr-1557	GUGAAGUGUUUGGGGGAACUC	osa-MIR395y	-48.80	0.98	DangsuA	UGGCCCCAGGAGUUCCUUGCAAGCACUUCACAUAGAACUUCAGUUACUCUCAUACAACAUUGUGAUUUUGAGAAGCUAUUGUGAAGUGUUUGGGGGAACUCUCGGUGCCA
pyr-1557	GUGAAGUGUUUGGGGGAACUC	bdi-MIR395l	-50.10	1.04	DangsuA	GUUUGGUAUUAUCAUGAGUUCCCUGCAAGCACUUCACGAGGCACUAUCCCAAGGGCUACUGUGAAGUGUUUGGGGGAACUCUUGGUGUCACCAAGC
pyr-1557	GUGAAGUGUUUGGGGGAACUC	bdi-MIR395m	-41.50	0.92	DangsuA	UGGUAUUACCAUGAGUUCCUUUGCAAGCAUUUCACGUACGAGGCACUAUCCCAAGGGCUAUUGUGAAGUGUUUGGGGGAACUCUUGGUGUCACCA
pyr-1557	GUGAAGUGUUUGGGGGAACUC	bdi-MIR395n	-46.60	1.04	DangsuA	UGGUAUUACCAUGAGUUCCCUGCAAGCACUUCACCAUGCACUACCCCAAGGGCUAUUGUGAAGUGUUUGGGGGAACUCUUGGUGUCACCA
pyr-1557	GUGAAGUGUUUGGGGGAACUC	bdi-MIR395o	-39.20	1.09	DangsuA	UAUUAUCAUGAAUUCCCUACAAGCACUUCACAAGAAGCUAUUCCUAGGGCUAUUGUGAAGUGUUUGGGGGAACUCUUGAUGUCACC
pyr-1557	GUGAAGUGUUUGGGGGAACUC	bdi-MIR395h	-47.30	1.18	DangsuA	ACCAUGAGUUCCCUGCAAGCACUUCACGAGGCCGUUUUCUGAGGGCUACUGUGAAGUGUUUGGGGGAACUCUUGGU
pyr-1557	GUGAAGUGUUUGGGGGAACUC	zma-MIR395i	-39.90	1.25	DangsuA	AGUUCCCUACAAGCACUUCACGAUACCUUGGCUUAAUAAAGGCCAGUUGUGAAGUGUUUGGGGGAACUCU
pyr-1557	GUGAAGUGUUUGGGGGAACUC	bdi-MIR395j	-45.70	0.99	DangsuA	GGUAUUCUCAUGAGUUUCCCGCAAGCACUUCACGAGGCCGUUUUCUGAGGGCUACUGUGAAGUGUUUGGGGGAACUCUUGGUCUCACC
pyr-1557	GUGAAGUGUUUGGGGGAACUC	bdi-MIR395k	-49.20	1.14	DangsuA	GUACUACCAUGAGUUCCCUGCAAGCACUUCAUGAGGCCCAAUUCUGAGGGCUACUGUGAAGUGUUUGGGGGAACUCUUGGUGUUAC
pyr-1557	GUGAAGUGUUUGGGGGAACUC	bdi-MIR395e	-78.40	1.02	DangsuA	GUUGGUUGUCACCUGGAGUUCUCCUCAAAUCACUUCAGUAGCUAGCUAGCUUGUGCCUCCUUGUUGCAUUGCCACUGUUUUAUAAGUGUGCUUGGGGCCAGAGAGCUGUGCACAGUGAAGUGUUUGGGGGAACUCUGGGUGGCAACCAGC
pyr-1557	GUGAAGUGUUUGGGGGAACUC	bdi-MIR395f	-58.00	1.26	DangsuA	GUUUGGUGUCCCCGGGAGUUCCCUUCAAACACUUUACGAAGCAUCUUUCUAAGACUAUUUGUGAAGUGUUUGGGGGAACUCUCGGUGUCACCAAGC
pyr-1557	GUGAAGUGUUUGGGGGAACUC	bdi-MIR395g	-49.30	1.20	DangsuA	GGUGUUACCAGGAGUUUCCUGCAAACACUUCACGAGUGCCUAUUUUAAUGGGUUGUUGUGAAGUGUUUGGGGGAACUCUUGAUGUCACC
pyr-1557	GUGAAGUGUUUGGGGGAACUC	bdi-MIR395a	-79.80	0.91	DangsuA	CAGGAGAUGAAUGGUUGGUUGUCAACUGGAGUUCUCCUCAAAUCACUUCAGUAGCUAGCUAGCUAGCUUGUGCCUCAUUGUUUCAUUGCCGCUGUUUAUAAGUGUGCAUGGAGCUGGAGAGCCGUGCACAGUGAAGUGUUUGGGGGAACUCCGGGUGGCAACCAACAAUACUGAUAUCACC
pyr-1557	GUGAAGUGUUUGGGGGAACUC	bdi-MIR395b	-54.10	0.97	DangsuA	CGGACCACGUUUGGUAUUACCAUGAGUUCCCUGCAAGCACUUCACGAGGCCCAAUUAUGAUGGCUACUGUGAAGUGUUUGGGGGAACUCUUGGUGUCACCAAGCUUACACAAAUAAAAAGA
pyr-1557	GUGAAGUGUUUGGGGGAACUC	bdi-MIR395c	-61.80	1.03	DangsuA	GGCGGCAGACCACGUUUGGUAAUACCAUGAGUUCCCUGCAAGCACUUCAUGAGGCCUAAUUCUAAGGGCUACUGUGAAGUGUUUGGGGGAACUCUUGGUGUUACCAAGCUUUUACAACAAAAGGAG
pyr-1557	GUGAAGUGUUUGGGGGAACUC	osa-MIR395b	-45.40	1.11	DangsuA	GAGUCCCUAGGAGUUCCUUUCAAGCACUUUACGACACACUGUAUUGAGAGUUGUCGUGAAGUGUUUGGGGGAACUCUUAGUGUCGC
pyr-1557	GUGAAGUGUUUGGGGGAACUC	osa-MIR395d	-45.50	1.11	DangsuA	GUAUUGUCGUGAGUUCCCUUCAAGCACUUCACGUGGCACUAUCUCAAUGCCUACUAUGUGAAGUGUUUGGGGGAACUCUCGAUAUCAC
pyr-1557	GUGAAGUGUUUGGGGGAACUC	osa-MIR395e	-45.10	1.10	DangsuA	GUAUUAUCGAGAGUUCCCUUCAACCACUUCACGUGGCACUGUUUCAAGGCCUAUUGUGUGAAGUGUUUGGGGGAACUCUCGAUAUCAC
pyr-1557	GUGAAGUGUUUGGGGGAACUC	osa-MIR395g	-41.70	1.04	DangsuA	GUAUCACCGUGAGUUCCCUUCGAACACUUCACGUGGCACUAUUUCAAUGCCUAUUGUGAAGUGUUUGGGGGAACUCUCGAUGUCAU
pyr-1557	GUGAAGUGUUUGGGGGAACUC	osa-MIR395h	-56.90	1.07	DangsuA	UUGUUACCUGGAGUUUCCUCAACACACUUCACAUCUGCUAGGCCCUAUUACAAUUGCGCAAUGUGGAGUCUGCAAUUGGUAGUGAAGUGUUUGGGGGAACUCUAGGUGGCAC
pyr-1557	GUGAAGUGUUUGGGGGAACUC	osa-MIR395i	-47.20	1.10	DangsuA	GUUUUACCGGGAGUUCUCUUCAAGCACUUCACGUAGAGCUUUCUAUUGACAUGGAGCUUUAGAACAAUGUGAAGUGUUUGGGGGAACUCUUGGUACCAA
pyr-1557	GUGAAGUGUUUGGGGGAACUC	osa-MIR395j	-52.40	1.03	DangsuA	GUGUUCCCAAGAGUUCCUUGCAAGCACUUCACAUAGAACUUCUGUUACUCUCAUGUAACAUUGGGAACUUGAGAAGCUACUGUGAAGUGUUUGGGGGAACUCUAGGUGGCAC
pyr-1557	GUGAAGUGUUUGGGGGAACUC	osa-MIR395k	-46.00	1.12	DangsuA	GUUUUAUCGGGAGUUUCCUUCAAGCACUUCACGUAGAGCUUUCUAUUGAUAUGGAGCUUUGGAACAAUGUGAAGUGUUUGGGGGAACUCUUGAUACCAA
pyr-1557	GUGAAGUGUUUGGGGGAACUC	osa-MIR395l	-43.30	1.11	DangsuA	GCGUUCCUUCCAAGCACUUCACACAGAGCUUUUAUUUCUCUCACAUCGAUUGAGAACUUAAUUAGAAGCUUUUGUGAAGUGUUUGGGGGAACUC
pyr-1557	GUGAAGUGUUUGGGGGAACUC	osa-MIR395m	-57.60	1.13	DangsuA	GAGUUCUCCUCAAAUCACUUCAGUAGAUAGCUAGCUAGGCUUCAUUGCAUUACACUGUUACAAAACUGUGAGCAUGGGGCCAAAAGCUAGUUGUAUAUAGUGAAGUGUUUGGGGGAACUC
pyr-1557	GUGAAGUGUUUGGGGGAACUC	osa-MIR395n	-39.60	1.28	DangsuA	GAGUUCCCUUCAAGCACUUCACGACGCACUAUUUAGAGAGUUGUUGUGAAGUGUUUGGGGGAACUC
pyr-1557	GUGAAGUGUUUGGGGGAACUC	sbi-MIR395j	-42.80	1.10	DangsuA	GUUCCCUUCAAGCACUUCACAUGAAGCUCUUUGCAUUAUAUUGGCGGAUGUAGCAUUGAGACCAAUGUGAAGUGUUUGGGGGAACUC
pyr-1557	GUGAAGUGUUUGGGGGAACUC	sbi-MIR395i	-44.70	1.02	DangsuA	GUUCCCUGCAAACACUUCACAAGCUAGACCAUAUAUAGUAUGCCCUUGCACAAUGUGGUAUCCAGUUACCUAGCUAGUGAAGUGUUUGGGGGAACUC
pyr-1557	GUGAAGUGUUUGGGGGAACUC	sbi-MIR395h	-37.00	1.06	DangsuA	GUUCCCUUCAAGCACUUCACAUGAGGCACCAUUCAAACUCUGUUUAAGAUUAGGUGUAAUGUGAAGUGUUUGGGGGAACUC
pyr-1557	GUGAAGUGUUUGGGGGAACUC	sbi-MIR395g	-35.40	1.07	DangsuA	GUUCCCUAAAAGCACUUCACGAGACCUUGGCUUAAUAAAGGGCCCUUGUGAAGUGUUUGGGGGAACUC
pyr-1557	GUGAAGUGUUUGGGGGAACUC	sbi-MIR395e	-48.80	1.00	DangsuA	AUUAGGUUUGGUGUCCCCGGGAGUUCUCUGCAAGCACUUCACGAGGCACUAUUUUGAGAGCUUUUGUGAAGUGUUUGGGGGAACUCUUGAUGCCACUAACCAUUU
pyr-1557	GUGAAGUGUUUGGGGGAACUC	sbi-MIR395d	-50.20	1.12	DangsuA	UCAAGUUUGGUGUCCCCAGGAGUUCUCUGCAAACACUUCACAAAGCACUUUUUUAGAGCUUUUGUGAAGUGUUUGGGGGAACUCUUGGUGCCACUGAUCAUUU
pyr-1557	GUGAAGUGUUUGGGGGAACUC	sbi-MIR395c	-40.50	1.23	DangsuA	GAGUUCCCUACAAGCACUUCACGAGACCUUGGCUUAAUAAAGGGUUGUUUGUGAAGUGUUUGGGGGAACUCUU
pyr-1557	GUGAAGUGUUUGGGGGAACUC	sbi-MIR395b	-50.00	1.06	DangsuA	GUUAGGUUUGGUGUCCCUAGGAGUUCUCUGCAAGCACUUCACGAGGCAUCGUUUUGAGAGCUUUUGUGAAGUGUUUGGGGGAACUCUUAGUGUCACAAAUCAUUU
pyr-1557	GUGAAGUGUUUGGGGGAACUC	sbi-MIR395a	-77.00	1.08	DangsuA	GGUUGGUUGGUUGUCACCUGGAGUUCUCCACAAACUACUUCAGUAGCAACACACACCCCUAGUUUAAUGCACCGUGUUUGCAUGUUUGUGUGGAGCUGUGUGUGUACAUAGUGAAGUGUUUGGGGGAACUCUGGGUGGCAAUCAGCAAUU
pyr-1557	GUGAAGUGUUUGGGGGAACUC	zma-MIR395p	-37.40	1.04	DangsuA	AGUUCCCUUCAAGCACUUCACAUGAGGCACCAUUCAAAUGACAACUCCAUUUAAGAUUAUGUGUAAUGUGAAGUGUUUGGGGGAACUCU
pyr-1557	GUGAAGUGUUUGGGGGAACUC	ata-MIR395c	-66.90	1.06	DangsuA	GUCACCUGGAGUUCUCCUCAAAUCACUUCAAUUGCUAGCUUAUGCCUAAUUGUUGCAUUGGCACUGUUUUAAAGUGUGCAUUGCAGGGAUAAGAGAGGCGUGCAUAGUGAAGUGUUUGGGGGAACUCUGGGUGGCAA
pyr-1557	GUGAAGUGUUUGGGGGAACUC	ata-MIR395b	-75.20	0.74	DangsuA	CUUACUGCGGGUUCCCUGCAAACACUUCACGAAGCAUUAUUUCAAACGCCAUUGCGAAGUGUUUGGAGGAACUCUUGGUGAAGUCAAGCUCCAAGAACUAAGAAGGUGAUCAAUACGAAGCAUGUUUGGUCUUACCGUGGGUUCCCUACGAGCACUCCACGAGGCAUUAUUCCAAAUACCACUGUGAAGUGUUUGGGGGAACUCUUGGUGAUGC
pyr-1557	GUGAAGUGUUUGGGGGAACUC	zma-MIR395j	-38.60	1.07	DangsuA	AGUUCCCUUCAAGCACUUCACAUGAGGCACCAUUCAAAUAACACAUUUCAAGAUUAGGUGCAUGUGAAGUGUUUGGGGGAACUCU
pyr-1557	GUGAAGUGUUUGGGGGAACUC	ata-MIR395e	-45.20	1.13	DangsuA	CUUACCGUGGGUUCCUUACAAGCACUUCACGAGGCAUUAUUACAAAUGCCACUGUGAAGUGUUUGGGGGAACUCUUGGUGAUGC
pyr-1557	GUGAAGUGUUUGGGGGAACUC	ata-MIR395d	-90.20	0.93	DangsuA	GUAUUACUGGGAGUUCCCUUCAAGCACUUUACGAACUACUUUUUUAAGGUAUUAUGUGAAGUGUUUGGGGAACUCUUGGUGCAACUAAGCACUUAAAAGAUAUUGCAAGUCAUAAACCACACGAGAUGUACUGCAAAUCCCGUUUGGUAUCACUGGGAAUUCCUUUCAAACACUUUACGGAUCACCUUUCUCAGGGCUCAUGUGAAGUGUUUGGGGGAACUCUCGGUGUAAC
pyr-1557	GUGAAGUGUUUGGGGGAACUC	zma-MIR395g	-29.00	1.00	DangsuA	AGUUCUAUGCAAGCACUUCACGAGGCAUUGUUUCAAGAGCUUUUGUGAAGUGUUUGGGGGAACUCU
pyr-1557	GUGAAGUGUUUGGGGGAACUC	zma-MIR395f	-25.50	0.80	DangsuA	AGUUACCUACAAGCACGUCUCGAUACCUUGGCUUAAUAAAGGCCAGUUGUGAAGUGUUUGGGGGAACUCU
pyr-1557	GUGAAGUGUUUGGGGGAACUC	zma-MIR395e	-38.60	1.07	DangsuA	AGUUCCCUUCAAGCACUUCACAUGAGGCACCAUUCAAAUAACACAUUUCAAGAUUAGGUGCAUGUGAAGUGUUUGGGGGAACUCU
pyr-1557	GUGAAGUGUUUGGGGGAACUC	zma-MIR395d	-29.00	1.00	DangsuA	AGUUCUAUGCAAGCACUUCACGAGGCAUUGUUUCAAGAGCUUUUGUGAAGUGUUUGGGGGAACUCU
pyr-1557	GUGAAGUGUUUGGGGGAACUC	zma-MIR395b	-58.80	1.25	DangsuA	GCAACGUUUUGUGUUACUAGGAGUUCCCUACAAGCACUUCACAAUACCUUGGCUCAAUAAAUUAAAGGCCAGUUGUGAAGUGUUUGGGGGAACUCUUGGUAUCAUGAAGCAUUU
pyr-1557	GUGAAGUGUUUGGGGGAACUC	zma-MIR395a	-78.20	1.04	DangsuA	UAUUGGUUGGUUGUCACCUGGAGUUCUCCUCAAACCACUUCAGUUGCUGCACCUAGCUAGUUUAAUGGCACUGUGCUUGCGUGCAAGCGGCCGGAGCUGUGUGUAGCUAGUGAAGUGUUUGGGGGAACUCUGGGUGUCAAUCAGCAAUU
pyr-870	UGCCAAAGGAGAAUUGCCCGG	ssl-MIR399	-39.00	1.08	DangsuB	UAGGGCACUUACUCCUUUGGCAGUAGCAUAGUAAAUUGUGAAUAUUUUUUUUUUUCUAUUUCACAUAGCUCACUGCCAAAGGAGAAUUGCCCGG
pyr-1999	CCCGCCUUGCAUCAAGUGAA	zma-MIR168b	-65.90	0.87	DangsuB	UCCGCCGCGCCGUCUCGGGCUCGCUUGGUGCAGAUCGGGACCCGCCGCCCGGCCGACGGGACGGAUCCCGCCUUGCAUCAAGUGAAUCGGAGCCGGCGCAGCGA
pyr-3973	UUCAAGAAAGCUGUGGGAAAA	cca-MIR396a	-55.10	1.38	DangsuA	AUGUUUUUCCACAGCUUUCUUGAACUUUAAAAAUUCAUGUGUUAAUUCCGUUCUCAAGAAUUCCUUUUCGAGAAUUCACGUGAUUAAACGAAGUUCAAGAAAGCUGUGGGAAAACAUGA
pyr-3973	UUCAAGAAAGCUGUGGGAAAA	cca-MIR396c	-57.90	1.32	DangsuA	GCCAUGUUUUUCCACAGCUUUCUUGAACUUUAAAAAUUCAUGUGUUAAUUCCGUUCUCAAGAAUUCCUUUUCGAGAAUUCACGUGAUUAAACGAAGUUCAAGAAAGCUGUGGGAAAACAUGACA
pyr-3973	UUCAAGAAAGCUGUGGGAAAA	nta-MIR396c	-52.20	1.16	DangsuA	UAUCAUGCUUUUCCACAGCUUUCUUGAACUUCUUUCCCUCUGAAUUUUCAUCUCUAGCAAUUGAGUUAUUGAUAUGAGAUAAGAUUAAGCUCUGAAAGUUCAAGAAAGCUGUGGGAAAACAUGGUGAA
pyr-3609	UUUGGUUUCCUCCAAUAUCUUA	mes-MIR2275	-32.60	0.99	DangsuA	CACAUAUCUUGAAAGUGAGAUUUGGAGGAACUCAAAACCUUUUUGUAAUAUCUGCUUUGGUUUCCUCCAAUAUCUUACCUUCAAUGGUUUGUG
pyr-3609	UUUGGUUUCCUCCAAUAUCUUA	ata-MIR2275c	-101.80	0.89	DangsuA	GCAGAUGAAUUUGAGUGUUGGAUGGGACCAAAUCUUACUGCCGGGUGUGGCAAGAUUUGGUUUCCUCCAAUAUCUUAUGUUCAUAUGUCAGACGCUGGGUGUUAGCUACAAGCCUACAACAAGUGAUAGUUGGAUGGACACCUGGGCCUGUCUCAAGAACCUAACCUCGCAAGCUGAAUGUGAGAUUUGGAUGGAACCAAAUCUUCAGCUAUAGUGGCACAAGAUUUGGUUUCCUCCAAUAUCUCAUCUUCAACUG
pyr-3609	UUUGGUUUCCUCCAAUAUCUUA	tae-MIR2275	-101.10	0.87	DangsuA	AAUUUUGGCAGAUGAAUUUGAGUGUUGGAUGGGACCAAAUCUUACCGCCGGGUGUGGCAAGAUUUGGUUUCCUCCAAUAUCUUAUGUUCAUAUGUCAGACACUGAGUGUUAGCUACAACAAGUGAUAGUUGGAUGGACACCUGGGCCUGUCUCAAGAACCAAACCUCGCAAGCUGAAUGUGAGAUUUGGAUGGAACCAAAUCUUCAGCUAUAGUGGCACAAGAUUUGGUUUCCUCCAAUAUCUCGUCUUCAACUGUCCCUGAUGA
pyr-1374	GACGGACGGUUAAACGUUGGAC	osa-MIR812d	-28.00	0.67	DangsuA	CGUAUCCAACAUUUGAUCAUCUGCCUUAUUCGAAAAAUUUAUAAAAAAAAACAAGUCACGCAUAAAGUAUUAUUCAUGUUUUAUCAUAUAAGAACAAUAAAAAUACUAAUCAUAAAAAAAGUAAAUAAGACGGACGGUUAAACGUUGGACACG
pyr-1374	GACGGACGGUUAAACGUUGGAC	osa-MIR812e	-57.00	1.30	DangsuA	GUUUUAGUGCCCAACUUUGACCGUCCGUCUUAUUUGAAAAUUUUUUUAUUACUAUUUUUAUUGUUAUUAGAUGAUAAAAUAUAAAUAUUACUUCAUGCGUGACUUAAUUUUUAAAAAAAUUUCAUAAAAUUUUUAAAUAAGACGGACGGUUAAACGUUGGACACGGAAAC
pyr-1374	GACGGACGGUUAAACGUUGGAC	osa-MIR812a	-92.30	1.34	DangsuA	ACCUCCGUCCCAAAAUAAGUGCAGUUUUACACUAUUCAUCUCCAAAGUUUGAUCGUUCGUCUUAUUUGAAAAUUUUUUAUGAUUACUAUUUUUAUUGUUAUUACAUGAUAAAACAUGAAUAGUAUUUUAUGUGUGACUAAUUUUUUUAAAAAUUUUCAUAAAUUUUUCAAAUAAGACGGACGGUUAAACGUUGGACACGGAUUUUCACGGCUGCACUUAUUUUGAAACGGAGGU
pyr-1374	GACGGACGGUUAAACGUUGGAC	osa-MIR812b	-55.20	1.20	DangsuA	GUAUCCGUAUCUACGUUUGACCGUUCGUCUUAUUUGAAAAUUUUAUGAAAAGAUUAAAAAAAUAGUCACGCAUAAAGUAAUAUUCAUGUUUUAUCAUCUAAUAACAAUAAAAAUACUAAUCAUUAAAAAUUUUCAAAUAAGACGGACGGUUAAACGUUGGACACGAAUAC
pyr-1374	GACGGACGGUUAAACGUUGGAC	osa-MIR812c	-54.20	1.15	DangsuA	GGUUUCCGCGUCUAAUGUUUGACCGUCCAUCUUAUUUGAAAAAAAUUAAAAACAUAAGUCAUGCAUAAAAUAUUAUUCAUGUUUUAUCAUUUAACAAUAAUAAUAACACCAAUCAUAAAAAAAAAUUAUAUAAGACGGACGGUUAAACGUUGGACACGGAAACC
pyr-4253	UGUGUUCUCAGGUCACCCCUC	lus-MIR398b	-68.60	0.93	DangsuB	UCAUGUCUCUGUGUUCUCAGGUCACCCCUCUGGGUCACCUUAUUUCUACAUUUCCAUCUCAAAUUCUAUUUUCUUAUAUUUAUUCGGGAGCGACGUUGAGACACAUACGUUCUCGAAAGAUAUCUAAACAAAUAUGGUUAGAUCCAGAGGGGUGCAACCUGAAAACACAGACGACGGA
pyr-4253	UGUGUUCUCAGGUCACCCCUC	lus-MIR398c	-52.20	0.97	DangsuB	GGCAAGAGGGGUGCAACCUGAAAACACAGACGACGGAUUUUAGUCGCUUGGUUCGAGUUAACUAUACUUAUCUCGUCUCUGUGUUCUCAGGUCACCCCUCCAGGCC
pyr-4253	UGUGUUCUCAGGUCACCCCUC	lus-MIR398d	-39.50	0.99	DangsuB	AAGGGGUGUAAUCUGAAAACACAGACGACGAGUAAUCAGUUGGAGUCUUGCUAUAUUUACUCAUGUCUCUGUGUUCUCAGGUCACCCCUC
pyr-4253	UGUGUUCUCAGGUCACCCCUC	lus-MIR398e	-44.20	0.96	DangsuB	GAGGGGUGCAACCUGAAAACACAGACGACGGAUUUUGGUCGUUUGGUUCAAGUUAACUACACUUAUGUCGUCUCUGUGUUCUCAGGUCACCCCUC
pyr-4253	UGUGUUCUCAGGUCACCCCUC	ssl-MIR398	-37.20	1.09	DangsuB	GAAGAGUGAUGCUGAGAACACAUGUGGAUUACUGGAUGCAUUAGUCCACUUGUGUUCUCAGGUCACCCCUC
pyr-4415	UGAUUGAGCCGCGCCAAUAU	bna-MIR171f	-40.30	0.77	DangsuB	ACGAAAGAGUCCUCUUUGAUAUUGGCCUGGUUCACUCAGAUCUUCCAGAUUACACACGUACUAUAUACAUUCUCUCAGUUAUCUGAUUGAGCCGCGCCAAUAUCUCAGUGCUCUCUCGU
pyr-4415	UGAUUGAGCCGCGCCAAUAU	bna-MIR171g	-30.10	0.89	DangsuB	GAUAUUGGCCUGGUUCACUCAGAUUACACACGUACUAUAUGCAUUCUCUUAGUUAUCUGAUUGAGCCGCGCCAAUAUCUC
pyr-4415	UGAUUGAGCCGCGCCAAUAU	bra-MIR171e	-40.30	0.77	DangsuB	ACGAAAGAGUCCUCUUUGAUAUUGGCCUGGUUCACUCAGAUCUUCCAGAUUACACACGUACUAUAUACAUUCUCUCAGUUAUCUGAUUGAGCCGCGCCAAUAUCUCAGUGCUCUCUCGU
pyr-4415	UGAUUGAGCCGCGCCAAUAU	atr-MIR171a	-64.70	0.98	DangsuB	AGAGGGUCUUUUGGAUACAUUGAAGGAGUUAUUUGCGAUGUUGGACCGGUUCAAUCAGAAAACACUGCCCAGAAAUUGCUGGGUCGUGUGCUUUGAUUGAGCCGCGCCAAUAUCCCAGAGCUUCUCAUCUUGUCUUUUCUAUCUCU
pyr-4415	UGAUUGAGCCGCGCCAAUAU	atr-MIR171c	-52.70	1.03	DangsuB	AUUGAAGGAGUUCUUGCGACAUUGGCCCGGUUCGAUCAGAGAUGAAAAUGCCAAGGAAAGAAAUGGAUGUUUGGUUUACUCUGAUUGAGCCGCGCCAAUAUCAAAGAGCUUCUCAAU
pyr-4415	UGAUUGAGCCGCGCCAAUAU	sbi-MIR171g	-34.60	1.12	DangsuB	UAUUGGUGAGGUUCAAUCCGAUGAUAGGUUUUACAAACAGCUGUAAAAUCAGUAUCUGAUUGAGCCGCGCCAAUAUC
pyr-4415	UGAUUGAGCCGCGCCAAUAU	bdi-MIR171a	-49.10	0.62	DangsuB	GAGGUAGGAGGCGGAGCGGAGGAAAGGCUUCCCGACCGGGGGAAGCUGGUGAUUGAGCCGCGCCAAUAUCUCUCGCGCGCCAGUGGAAUUGCCGGCUUCAGCUGCUUUCGCCGCCGCAGC
pyr-4415	UGAUUGAGCCGCGCCAAUAU	mdm-MIR171e	-59.80	0.88	DangsuB	UGAAAUAGUUACUGUGAUGUUGGCCCGGUUUCACUCAGAGAGGAAGACUGCUUACUGCUGCAUCUGCAUGUACGUAGGAACGUACGUUGUGGUUGGUCUCCUGAAUCUGAUUGAGCCGCGCCAAUAUCUCAGUGCUCUUUCA
pyr-4415	UGAUUGAGCCGCGCCAAUAU	mdm-MIR171d	-36.40	0.67	DangsuB	GAUGUUGGCUCGAUUUCACUCAGAGAAGAAGACUGCUUACUGCUUACUGCUGCAUCUGCAUGUACGUAGGAACAUAUGUUAUGGUUGGUCUCAUGAAUCUGAUUGAGCCGCGCCAAUAUC
pyr-4415	UGAUUGAGCCGCGCCAAUAU	mdm-MIR171c	-52.40	0.94	DangsuB	UACUGUGAUGUUGGCCCGGUUCACUCAGAGAAGAAGACUACUUACUGCAUUUGCAUGUACGUAGAUACGUACGUUGUUCUAUGGUCACCUGAAUCUGAUUGAGCCGCGCCAAUAUCUCAGUG
pyr-4415	UGAUUGAGCCGCGCCAAUAU	aly-MIR171a	-53.30	0.66	DangsuB	UCGUUUUUUAUAUUGUUUUCCUUUGAUCUAUCACUUAAGCACGAGAGAGUCCCUUUGAUAUUGGCCUGGUUCACUCAGAUCUUCCCUGACCACACUCACGUCGUACAUAUGCAUUCUCUCUAGAUUAUCUGAUUGAGCCGCGCCAAUAUCUCAGUACUCUCUCGUCUCUAUUUUGGACUUUGUGAUCUUGUAAAUCGA
pyr-4415	UGAUUGAGCCGCGCCAAUAU	osa-MIR171a	-45.40	1.08	DangsuB	GGAAAGAGCGAUAUUGGUGAGGUUCAAUCCGAUGAUUGGUUUUACAGCAGUGGUAAAAUCAGUAUCUGAUUGAGCCGCGCCAAUAUCUCUUCCUCU
pyr-4415	UGAUUGAGCCGCGCCAAUAU	tcc-MIR171a	-38.20	0.78	DangsuB	UUAGGCACCUACCUACACUAGGUAUUGACACGGUUCAACCUCACCGUAAUGUCAAUGAACUAACUCGACUUUAUGGUUUGAUUGAGCCGCGCCAAUAUCUUGUGCUUUUUACCUUAAUU
pyr-4415	UGAUUGAGCCGCGCCAAUAU	ath-MIR171a	-45.00	0.85	DangsuB	AUGAGAGAGUCCCUUUGAUAUUGGCCUGGUUCACUCAGAUCUUACCUGACCACACACGUAGAUAUACAUUAUUCUCUCUAGAUUAUCUGAUUGAGCCGCGCCAAUAUCUCAGUACUCUCUCGU
pyr-4415	UGAUUGAGCCGCGCCAAUAU	zma-MIR171a	-41.10	1.08	DangsuB	GAUAUUGGCGAGGUUCAAUCAGAUGAUGUAUUUUUCUUAUAUAUAAAUUUGCAUGCAUGAAGGUGUGAAUCCAGUGUCUGAUUGAGCCGCGCCAAUAUC
pyr-4415	UGAUUGAGCCGCGCCAAUAU	zma-MIR171n	-36.70	1.22	DangsuB	AUAUUGGUGAGGUUCAAUCCGAUGUUAGGUUUUACAAAAGCUGUAAAAUCAGUAUCUGAUUGAGCCGCGCCAAUAUCU
pyr-4415	UGAUUGAGCCGCGCCAAUAU	cme-MIR171e	-38.70	0.88	DangsuB	CUAUGAUAUUGGUCCGGUUCACUCAGAUCACUACCCUAAAUUGACUAGGGUUUCAUUUGAAGUUUAAAUUGAGUCUGAUUGAGCCGCGCCAAUAUCUCAGUGCUCU
pyr-1950	UAGACGACGGUUGUAUGACCG	pgi-MIR6136a	-107.40	1.38	DangsuA	UAUAUACUUAUUUUACUCACCCGUGCUCAUCUCUUUAGACGACGGUUUCGGUCAUACAACCAUCAUUUAUACUUUUAGCGACGCUAUAUGUUGUCCGUCGACUAAAAGUAUAGACGACGGUUGUAUGACCGAAACGUCGCCUAAAGGGAGGUUAGCACGGGUGAGUAAGAUAAGGGGUAUG
pyr-4252	UAGCCAGGAAUGGCUUGCCUA	bdi-MIR169j	-81.20	0.85	DangsuB	CUUACAUGGAGAUAAGGAGCCUACCUCUGUUAGCCAGGAAUGGCUUGCCUACGCACACAUUUUUCGGUUCAUCACAGGGGCAAAACUAACUUGGAGAUAGCCCCUAGUAUGAUGGACGGAGUGUGGCUGCAUGGUCAAGCCUUCCUGACUAGGAGAGUGCUCCUCAUCCCCCAUGCUAGGCUG
pyr-2957	UUCAAGAAAUCUGUGGGAAG	csi-MIR396c	-48.20	0.73	DangsuA	CCUGUCAUGUUUUUCCACAGCUUUCUUGAACUUCUUUCUUUCUUCUUCUUCUUCUUCUUCUUCUUCUUCUUCUUCUUCUUCUUCUUCUUCUUCUUCUUCCUCUAAUAAUAGGCUACGAUUUGAUGUGGCUAGCUGCAGCUAUUAGAAGUUCAAGAAAUCUGUGGGAAGAAAUGGCAAA
pyr-2732	UCGCAGGAGAGAUGGCACUGUC	ppe-MIR3627	-57.70	1.15	DangsuA	AAGUUGAGGGAUUUAUGUUCGCAGGAGAGAUGGCACUGUCUGUGGUGCAACUAGCUACCAGCAGAUGGUGUCAUCCCUCCUGUGACCAGAAAACCCUAUAACUU
pyr-722	UGCCAAAGGAGAUUUGCCCCG	tcc-MIR399h	-54.80	0.96	DangsuB	AAAGAUGCAUGGAUGCAUUACAGGGCAAAUCUCCUUUGGAAGUCAGCUGAACUCGAGGCAUGGGAGAUAAGCUCACUGCCAAAGGAGAUUUGCCCCGCAAUUCAGCCAUGCUAAACC
pyr-722	UGCCAAAGGAGAUUUGCCCCG	ghr-MIR399e	-72.10	0.92	DangsuB	AAAAAUGCAUGGGUGCAUUACUGGGUGAAUCUCCUUUGGAAGGCAACUAAAACUCGGUUACAUUGCAUGUUGGCAUGCCAUGUGGUGGGCGACAUGCGAUGCGAUGCUUAGCUCACUGCCAAAGGAGAUUUGCCCCGCAAUUCAGCCAUGCAACACG
pyr-722	UGCCAAAGGAGAUUUGCCCCG	ptc-MIR399a	-48.90	0.83	DangsuB	GCAAUAAUUACCGGGCAAUUACUCUUUUGGCAGCUGGCCACUCAACGGCGGCAGGUGAUCAAAUUCACCAAUGCAAACAAGUAAGCUCGCUGCCAAAGGAGAUUUGCCCCGCAAUUCAUC
pyr-722	UGCCAAAGGAGAUUUGCCCCG	ath-MIR399d	-45.00	0.96	DangsuB	GGUUGGAUUACUGGGCGAAUACUCCUAUGGCAGAUCGCAUUGGCUAGAUAUGCAAGUAAAAUGCUUCUCUGCCAAAGGAGAUUUGCCCCGCAAUUCAUCC
pyr-722	UGCCAAAGGAGAUUUGCCCCG	aly-MIR399g	-53.60	0.94	DangsuB	GAUGAUGCAUGGUUGGAUUACAGGGCAAAUACUCCAUUGGCAGAUAGUUUUCGCUACAUCUAUAUUAUUUGUUAUUAUAUGGGUGAAUCAAUGUAUGAAAAAUACUUUACUGCCAAAGGAGAUUUGCCCCGCAAUUUGUUCCAUGCAAAAGAACAUC
pyr-722	UGCCAAAGGAGAUUUGCCCCG	aly-MIR399d	-56.90	1.00	DangsuB	GAGAGAUAAUGUAUGGUUGGAUUACUGGGCGAAUACUCCUAUGGCAGAUAGCUUUGCCUAGAUAUGCAAGCAAAAUGCUUCUCUGCCAAAGGAGAUUUGCCCCGCAAUUCAUCCAUGCAAAACAAUACAUCUUUC
pyr-722	UGCCAAAGGAGAUUUGCCCCG	cme-MIR399a	-42.60	0.95	DangsuB	AUUACUGGGCAAUUACUCUUUUGGCAGAUAUGUUAUGCAUGCUCUUGAUGACUUAUGUGUCAAGAAGCAUACUUGCUAACUGCCAAAGGAGAUUUGCCCCGCAAUAUUCUC
pyr-722	UGCCAAAGGAGAUUUGCCCCG	hvu-MIR399	-35.40	0.61	DangsuB	UCAGAAGAACUAGGUAGAUUUGCCAAAGGAGAUUUGCCGAACUAUAGGUACUGUAGGUAGGUUUUGCCAAAAGGAGAUUUGCCCCGAACUAUCGGUAGGUUUGCCAAAGGAGAUUUGCCCCGAAGAACUUA
pyr-722	UGCCAAAGGAGAUUUGCCCCG	aly-MIR399i	-54.30	1.06	DangsuB	GCAUGGUUGGAUUACAGGGCAAAUACUCCAUUGGCAGAUAGUUUUCGUUGCAUCUAUAUUAUUGAUUAUCGAUGUAUGAAAAAUUCUUUACUGCCAAAGGAGAUUUGCCCCGCAAUUCAUCCCGUGC
pyr-2046	UUUGCAGUUCGAAAGUGGAAGC	hbr-MIR9386	-60.30	1.26	DangsuA	UUAGCUUUCACCCAAUAACCUUUGCAGUUCGAAAGUGGAAGCUUUUUCACAACCACUUUGGAUAGGAAUUGGAAGAGCUUCCACUUUCGAUUGCAAAGGUAAUUGAGUAGAGCUGC
pyr-1633	GCUCACCCUCUCUCUGUCAGC	bdi-MIR156i	-66.60	0.77	DangsuA	GUCAGAACGGCUGACAGAAGAGAGUGAGCACACAGCGGCAGCCUGCAUCUGGAGCUAAAGACGAUGAUGUGUCGAUGCAUGUGAAGAAGGGGAAAAGAGAUAGGCGCAGCUGCUGUUGCGUGCUCACCCUCUCUCUGUCAGCUCUCCUCUCCCC
pyr-1633	GCUCACCCUCUCUCUGUCAGC	tae-MIR156	-144.90	0.91	DangsuA	UCCUCUCUCUCUCUCUCUCUGCGUGUCGACCGUCUGCUGUGUCCGAUGGGAUCGGUCGGGGGCUGCGGUGGAGGGUUGAUGAUGGUGCGAAUGGCUGACAGAAGAGAGUGAGCACACAGCGGCAGACUACGUCUGGUAAAGAGGACGGAUGGAUGCGAAGAGAGAUAUAGACGCAGCUGCUGUUGCGUGCUCACCCUCUCUCUGUCAGCGUUCCGCCAUCAAUCAAUCUAUCCAUCCAUCUCCCCUUGCCGUUCCCAUCGCUUCGCAGCUCGACUGCC
pyr-1633	GCUCACCCUCUCUCUGUCAGC	bdi-MIR156g	-61.80	0.95	DangsuA	CUUUGGAGGUUUGACAGAAGAGAGUGAGCACACGCGGUGGUUUCCUAGCAUGCAGGAGCCAUGCUGGGAGCUGCGCGUGCUCACCCUCUCUCUGUCAGCCGUUCACCAUGC
pyr-1633	GCUCACCCUCUCUCUGUCAGC	ata-MIR156a	-64.20	1.02	DangsuA	UUUGGAGGUCUGACAGAAGAGAGUGAGCACACGCGGUGGUUUCCUAGCAUGCGAGCGCCAUGCUGGGAGCUGCGCGUGCUCACCCUCUCUCUGUCAGCCAUUCACCAU
pyr-1633	GCUCACCCUCUCUCUGUCAGC	ata-MIR156e	-64.50	0.86	DangsuA	UGCGAAUGGCUGACAGAAGAGAGUGAGCACACAGCGGCAGACUACGUCUGGUAAAGAGGACGGAUGGAUGCGAAGAGAGAGAUAGACGCAGCUGCUGUUGCGUGCUCACCCUCUCUCUGUCAGCUCUCUCUCCG
pyr-1633	GCUCACCCUCUCUCUGUCAGC	hvu-MIR156b	-66.50	0.99	DangsuA	GCUGACAGAAGAGAGUGAGCACACAGCGGCAGGCUGCGUCUGAUAAAGAGGACGGAUGGAUGCGAAGAGAGAGAGAUAGACGCAGCUGCUGUUGCGUGCUCACCCUCUCUCUGUCAGC
pyr-1382	UUGAGCCGUGCCAAUAUCACA	smo-MIR171b	-39.10	0.81	DangsuB	UGUGUCUGUGAUAUUGACAAGGCUCAAUCAGGCUGCAAUGCUACUCGAGCUAAUUAGUGAUGCUGCCAGCUUGAGCCGUGCCAAUAUCACAUAGAUAGCUAGC
pyr-1382	UUGAGCCGUGCCAAUAUCACA	gma-MIR171q	-47.90	1.11	DangsuB	UGAGAACUUGAGAUAUUGGUGCGGUUCAAUCAGAAGGCAGUGUUUUAUGAUCCAAAAACUCUGUGUUAUUUGAUUGAGCCGUGCCAAUAUCACAUGUAAUUCAUCUCGG
pyr-1382	UUGAGCCGUGCCAAUAUCACA	zma-MIR171f	-70.50	0.88	DangsuB	UUGGUUGUUGGCUGAGAGAGUGCGAUGUUGGCAUGGCUCAAUCAACUCGCCGGCCGCGGGUGGCUUAUAGCUUAAUUCUGCGCAUUCGAUCGAGGUGCGGGCGCAGUGUUUAAUUGAUUGAGCCGUGCCAAUAUCACAACCUUCUCUAGCCUAUA
pyr-1382	UUGAGCCGUGCCAAUAUCACA	pde-MIR171	-53.80	1.25	DangsuB	GAAAGAAUGUGAUGUUGGCUAGGCUCAAUCGGAUUGUAACGCCCACGGAAUUUGGUCUUGUGAUCUGAUUGAGCCGUGCCAAUAUCACAUUCUAAC
pyr-1382	UUGAGCCGUGCCAAUAUCACA	tcc-MIR171g	-50.60	1.01	DangsuB	GAUUUCUUAGUUGAAAAUUUGAUGUUGGCACGGUUCAAUCGGAUCAAAUCUCUCAGUGGCUGAGUCCUUUAGUCUGAUUGAGCCGUGCCAAUAUCACAUUCAGUCACUGCAUCGG
pyr-1382	UUGAGCCGUGCCAAUAUCACA	ptc-MIR171h	-44.70	1.04	DangsuB	GAAAGUGGGGGAUGUUGGGAUGGCUCAAUCAUAUCAAAUCUCCCAAACUAUGAUGUUGGGUCGUUUAAUCUGAUUGAGCCGUGCCAAUAUCACACUAACU
pyr-1382	UUGAGCCGUGCCAAUAUCACA	atr-MIR171b	-88.40	0.91	DangsuB	GGUAUGAAGUUGGUUUUCAUGGGAGGAAGGCGAAGGGGACUCGGUUCGCGUGCGGUGUUGGCACGGUUCAAUCUGACUGCUGCCCUGCUAGUUGUGCAGUAUGGUGGUGCGAUUGAGCCGUGCCAAUAUCACACUCAAUCAGCCAUCGAAUCAAGUCUUCUUCUUCCUCCUCCUCUUCCUCUUCUUAUU
pyr-1382	UUGAGCCGUGCCAAUAUCACA	zma-MIR171i	-52.90	0.96	DangsuB	CUGGUUGGCUGAGAGAGUGCGAUGUUGGCACGGUUCAAUCAAAUCGCCGGCCGGGUUGACUUGUUGAUUGAGCCGUGCCAAUAUCACAACCUUCUCUAGCCUAG
pyr-1382	UUGAGCCGUGCCAAUAUCACA	gma-MIR171c	-46.50	1.19	DangsuB	UUAAGAACUUGAGAUAUUGGUGCGGUUCAAUCAGAAGGCAGUGUUUUAUGAUCCAAAAGCUCUGUGUUAUUUGAUUGAGCCGUGCCAAUAUCACAUGUUAUUGA
pyr-1382	UUGAGCCGUGCCAAUAUCACA	sbi-MIR171a	-74.80	0.94	DangsuB	UUGGUUGGCUGAGAGAGUGCGAUGUUGGCAUGGUUCAAUCAAAUCAUCGCCCGGCAAGGUGACUUAAAUUUUGCGCUUUCGAUCGAUCGAGGUGCAGGGAGGUGUUUCCAGGCACCGUGUUUGAUUGAGCCGUGCCAAUAUCACAACCUUCUCUAGCCUAU
pyr-1382	UUGAGCCGUGCCAAUAUCACA	ptc-MIR171g	-43.10	1.03	DangsuB	GAAAGUGGGGGAUGUUGGGAUGGCUCAAUCAUGUCAAAUCUCCCAAAUUAUGAUGUUGGGUCUUUUAAUCUGAUUGAGCCGUGCCAAUAUCACACUUCUU
pyr-1382	UUGAGCCGUGCCAAUAUCACA	gma-MIR171f	-43.40	1.21	DangsuB	GAGAUAUUGGUACGGUUCAAUCAGAAGGCAGUGCUUUAUGAUUUCAAAGCUCUCUUAUUUGAUUGAGCCGUGCCAAUAUCACAUGCAAAC
pyr-1382	UUGAGCCGUGCCAAUAUCACA	osa-MIR171f	-60.50	1.01	DangsuB	GGGAGAGUGCGAUGUUGGCAUGGUUCAAUCAAACCGGGCAAACUUAUGCACUAGCUAAGCAAGAUGCAGGGAUAUGCAGUAUGGUUUUGUUUGGUCUGAUUGAGCCGUGCCAAUAUCACAAGCUUGC
pyr-1382	UUGAGCCGUGCCAAUAUCACA	mdm-MIR171o	-38.90	1.34	DangsuB	UGGGAUGUUGGUAUGGUUCAAUCAAAUAAAAUCUCUCAAAAUUUGGGUCCUUUAAUUUGAUUGAGCCGUGCCAAUAUCACA
pyr-1382	UUGAGCCGUGCCAAUAUCACA	mdm-MIR171n	-38.90	1.34	DangsuB	UGGGAUGUUGGUAUGGUUCAAUCAAAUAAAAUCUCUCAAAAUUUGGGUCCUUUAAUUUGAUUGAGCCGUGCCAAUAUCACA
pyr-1382	UUGAGCCGUGCCAAUAUCACA	mdm-MIR171m	-40.80	1.27	DangsuB	UGGGAUGUUGGAAUGGCUCAAUCAAAUAAAAUCUCCCAAAGGAUUGGGUCUUUUAAUUUGAUUGAGCCGUGCCAAUAUCACA
pyr-1382	UUGAGCCGUGCCAAUAUCACA	gma-MIR171o	-48.20	1.24	DangsuB	UAAGGGCUUGAGAUAUUGGUACGGUUCAAUCAGAAGACAGUGCUUUAUGAUUCUAAAGCUCUCUUAUUUGAUUGAGCCGUGCCAAUAUCACAUGCAAACUUU
pyr-1383	AAAAAUCGUUAGGCGCUA	rgl-MIR5138	-29.60	0.85	DangsuA	UCAAUGUUAAAAAAAUCGUUAGGCGCUAGUUAGGCUUUCGAUAGAAGCCUUGAGCCUAUAUCGAUCAGUGCCUAGGUCAAUUUUUUAAACAUUGU
pyr-977	CUGAAGUGUUUGGGGGGACUC	aly-MIR395b	-51.90	1.08	DangsuA	GCCAAAUGUCCCCAUGAGUUCCCUUUAACGCUUCAUUGUUAAAUACUCAAAGCCACAUUGGUUUGUAUAUAACACUGAAGUGUUUGGGGGGACUCUUGGUGCCAUUUUGGC
pyr-977	CUGAAGUGUUUGGGGGGACUC	bna-MIR395f	-45.40	0.95	DangsuA	GUCCUCUUGAGUUCCCUUUAACGCUUCAUUGUUCAGACUUGGUUGUCUAAUAUCUACCGAUACAUCAACGUAAUGAACACUGAAGUGUUUGGGGGGACUCUAGGUGGC
pyr-977	CUGAAGUGUUUGGGGGGACUC	aly-MIR395f	-58.00	1.09	DangsuA	GUCAAAUGUCUCCUUGAGUUCCCUUAAACGCUUUAUUGUUCACACUUUGUUGUCUAAGAUCAAUCGAUCGAUUCAAUCAAUCUGACGAACACUGAAGUGUUUGGGGGGACUCUAGGUGACAUAUGGC
pyr-977	CUGAAGUGUUUGGGGGGACUC	bna-MIR395d	-45.10	0.92	DangsuA	GCCCCCAUGAGUUCCCUUUAACGCUUCAUUGUGAUUACUCCAGUCACAUUUAUUUUUCUUAAAUGUUUGGUCGAUUUUUGUAUACAACACUGAAGUGUUUGGGGGGACUCGUGGUGC
pyr-977	CUGAAGUGUUUGGGGGGACUC	bna-MIR395e	-49.30	1.20	DangsuA	CCCCUUGAGUUCCCUGAAACGCUUCAUUGUUCAUUACGUAGAUGUUUAGUAAAUCAAUCUAAUGAACACUGAAGUGUUUGGGGGGACUCUAGGUGG
pyr-977	CUGAAGUGUUUGGGGGGACUC	aly-MIR395h	-55.20	0.95	DangsuA	GUCAACUGUCCCCUUGAGUUCCCUUAAACGCUUCAUUGUUCAUACUUUGUGAGUUUGUGUUCUAAGAUCUAUCGACCGAUAAAUCAAUCUGAUGAACACUGAAGUGUUUGGGGGGACUCUAGGUGACAUCUUGGC
pyr-977	CUGAAGUGUUUGGGGGGACUC	ath-MIR395f	-53.10	1.15	DangsuA	AUGUCCCCUUGAGUUCCCUUAAACGCUUCAUUGUUCAUACUUUGUUAUCAUCUAUCGAUCGAUCAAUCAAUCUGAUGAACACUGAAGUGUUUGGGGGGACUCUAGGUGACAU
pyr-977	CUGAAGUGUUUGGGGGGACUC	ath-MIR395b	-43.50	1.04	DangsuA	AUGUCCCCAUGAGUUCCCUUUAACGCUUCAUUGUUAAAUACUCAAAGCCACAUUGGUUUGUAUACAACACUGAAGUGUUUGGGGGGACUCUUGGUGUCAU
pyr-977	CUGAAGUGUUUGGGGGGACUC	ath-MIR395c	-42.70	1.04	DangsuA	AUGUCCACAUGAGUUCCCUUUAACGCUUCAUUGUUGAAUACUCAAAGCCACAUUGGUUUGUAUAUAACACUGAAGUGUUUGGGGGGACUCUUGGUGUCAU
pyr-841	UUUUUAGUUGGCAUGCAUUCA	mtr-MIR5248	-20.60	0.40	DangsuB	UCUCUUAAGCUUUUUAGUUGGCAUGCAUUCAGAACUCCAAGUCCUAAAGAAAGUUACGCUGACCUUUGUAGAGAUGUUGUUGAGUACUGUGGGGGGUUGCCGGUAGCUCUUGAAAUCCUU
pyr-4130	UGAAGCUGACAGCAUGAUCUA	tae-MIR167b	-33.20	0.66	DangsuB	CUGCCCAAGGGAACGAGUGAAGCUGACAGCAUGAUCUAUCUCCGAGUGAUCAAACAAGAAACGCUGCGGCAGCCUCACUUCUUCCCGGCG
pyr-4735	UCAUACAACCGUCGUCUAUAC	pgi-MIR6136b	-107.30	1.45	DangsuA	CUUAUCUUACUCACCCGUGCUAACCUCCCUUUAGGCGACGUUUCGGUCAUACAACCGUCGUCUAUACUUUUAGUCGACGGACAACAUAUAGCGUCGCUAAAAGUAUAAAUGAUGGUUGUAUGACCGAAACCGUCGUCUAAAGAGAUGAGCACGGGUGAGUAAAAUAAG
pyr-4731	GUAGCAUCAUCAAGAUUCAC	atr-MIR172	-110.50	0.84	DangsuB	GUUGUUUGUUUGAUGCAUGGGGUAGAAGAGAGAGAAAAGAAGAAAAAAGAGGAGGAGGAGGAGGAUAUCAGUCAGUGUUUGCUGGUGUAGCAUCAUCAAGAUUCACAUCUUGUAAGAGAUCCCUUUGAAUCGGUGGGAUCACACUUCACUACAUAAGAUCACGAUUUAGAGAGGGAAAGCUGACCAUAAGAUGGGAAUCUUGAUGAUGCUGCAUCGGCAAUAAGUGACUUUGUGUUUCACCGUUCGUUGCCACCCUCAUUUGCACUCUCCUCGGCAAAGGUGAGAGAAACAGAGGAC
pyr-4731	GUAGCAUCAUCAAGAUUCAC	nta-MIR172h	-50.20	1.14	DangsuB	GUUUGCGGGUGUAGCAUCAUCAAGAUUCACAUGAAAAGGCAAGGUGAAAUGAAAUUAAUUAAGAGCCAUGGCUUUUUGAAGGUGAGAAUCUUGAUGAUGCUGCAUCAGCAAUAA
pyr-4731	GUAGCAUCAUCAAGAUUCAC	nta-MIR172e	-126.30	0.93	DangsuB	GUUUGCAGAUGUAGCAUCAUCAAGAUUCACAUAAAAAACGCAUGGUGAUGAGCUGAUGAAAUGACAUUAAUGGCCAAGGCAGCUUUCUGAAGGUGAGAAUCUUGAUGAUGCUGCAUCAGCAAUAAACGACUACCUGAUUUAUCAUUAUGCCAUUGGAACGAUACACAGAUAAUUAGCAUAAUUCAUGUGCAAGAAUGCCACGGGUACAUGGUAUGGUUCAAUUGAUACAGUCGUUGUUUGCGGGUGUAGCAUCAUCAAGAUUCACAUGAAAAGGCAAGGUGAAAUGAAAUUAAUUAAGAGCCAUGGCUUUUUGAAGGUGAGAAUCUUGAUGAUGCUGCAUCAGCAAUAA
pyr-4731	GUAGCAUCAUCAAGAUUCAC	nta-MIR172d	-47.60	0.95	DangsuB	GUUUGCAGAUGUAGCAUCAUCAAGAUUCACAUAAAAAACGCAUGGUGAUGAGCUGAUGAAAUGACAUUAAUGGCCAAGGCAGCUUUCUGAAGGUGAGAAUCUUGAUGAUGCUGCAUCAGCAAUAAA
pyr-4731	GUAGCAUCAUCAAGAUUCAC	nta-MIR172f	-67.60	0.89	DangsuB	UCUGAAGGUGAGAAUCUUGAUGAUGCUGCAUCAGCAAUAAACGACUACCUGAUUUAUCAUUAUGCCAUUGGAACGAUACACAGAUAAUUAGCAUAAUUCAUGUGCAAGAAUGCCACGGGUACAUGGUAUGGUUCAAUUGAUACAGUCGUUGUUUGCGGGUGUAGCAUCAUCAAGAUUCACAUGAAAAGGC
pyr-4731	GUAGCAUCAUCAAGAUUCAC	nta-MIR172c	-51.70	1.10	DangsuB	GUUUGCGGAUGUAGCAUCAUCAAGAUUCACAUGCAAAACGCAUGGUGAUGAAAUGAUAUUAAUGGCCAUGGCAGCUUUUUGAAGGUGAGAAUCUUGAUGAUGCUGCAUCAGCAAUAA
pyr-4731	GUAGCAUCAUCAAGAUUCAC	tcc-MIR172e	-65.50	0.83	DangsuB	UUGACAGUCGUUGUUUGCGGGUGUAGCAUCAUCAAGAUUCACAUGCAAAUGCACGGUGGUGGUGAUGGAUAAUACAAACUCUCUUCUUUUUUUCUCCCCUUCCCCUUUCUUUUCCCUUCUCCUUUAUGCCAAAGUUGUUUGGAAAGUGAGAAUCUUGAUGAUGCUGCAUCGGCAAUAAACGACUAUACA
pyr-4731	GUAGCAUCAUCAAGAUUCAC	aau-MIR172	-59.00	0.88	DangsuB	GCAGAUGUAGCAUCAUCAAGAUUCACAUGCAAAUGCAACAAGUGGAAGUGAGAUUAUUUUUGAAUGAUAGAUGCAACCUUCUAAUCAAAAUCUCUCUCUCUCUCUCUCUCUCUGUGGCCACUUGGUUUCUUUCGGAACUGAGAAUCUUGAUGAUGCUGCAUCAGC
pyr-4731	GUAGCAUCAUCAAGAUUCAC	lus-MIR172a	-46.70	1.14	DangsuB	AGUCGUUGUUUGCUGGCGUAGCAUCAUCAAGAUUCACAUUCCGAACUGGGAUCAUGAGAAUCUUGAUGAUGCUGCAUUGGCCAUAUACGACU
pyr-4731	GUAGCAUCAUCAAGAUUCAC	vun-MIR172	-60.40	1.01	DangsuB	UUCACAGUCGUUGUUUGCGGAUGUAGCAUCAUCAAGAUUCACAUGCAAACGAAGGUGGAUGGGACUGUGAUGCAAUCUAACCGCUCGUCUUUUUGAUGUGAGAAUCUUGAUGAUGCUGCAUCAGCCAUAAACGACUUUAA
pyr-4731	GUAGCAUCAUCAAGAUUCAC	gma-MIR172b	-65.50	0.98	DangsuB	UUGACAGUCGUUGUUUGCGGAUGUAGCAUCAUCAAGAUUCACAUGCAAAUGAAGGUGGGUGGGACUAUGAUGCAAUCCAAGUGCUCUGCCAAUCCAUCGGUCUUUUUGAUGUGAGAAUCUUGAUGAUGCUGCAUCAGCCAUAAACGGCUUUAA
pyr-4731	GUAGCAUCAUCAAGAUUCAC	gma-MIR172a	-65.00	0.88	DangsuB	UUAACAGUCGUUAUUUGCGGAUGUAGCAUCAUCAAGAUUCACAUGCAAGCGCAGGUGGUGGGUGGGACUUGAUGCAAUCUAAGUGCUGUGCCAGCCAAGCCAUAGGUCUUUUGGAACUGAGAAUCUUGAUGAUGCUGCAUCAGCCAUAAACGACUUCAC
pyr-4731	GUAGCAUCAUCAAGAUUCAC	ssl-MIR172	-46.60	1.19	DangsuB	GUGUAGCAUCAUCAAGAUUCACAUGCAAAAAAGCAUGCCAUAUAUAUGAGCUGAGCCCAGCUUUGGAUGGUGAGAAUCUUGAUGAUGCUGCAU
pyr-4731	GUAGCAUCAUCAAGAUUCAC	nta-MIR172i	-47.70	1.16	DangsuB	GUUUGCAGAUGUAGCAUCAUCAAGAUUCACAUAUUAUAAAGGCAUGAUGAUUAACGACCAUGGCCUUUUUGGAGGUGAGAAUCUUGAUGAUGCUGCAUUAGCAAUAAAC
pyr-4731	GUAGCAUCAUCAAGAUUCAC	gma-MIR172f	-60.20	0.94	DangsuB	GCGGAUGUAGCAUCAUCAAGAUUCACAUGCAAACGCAGGUGGUGGGUGGGACUGUGAUGCAAUCUAAGUGCUACUGUGCCAACCAAAGCCAUAGGUCUUUUGGAAGUGAGAAUCUUGAUGAUGCUGCAUCAGC
pyr-4731	GUAGCAUCAUCAAGAUUCAC	mtr-MIR172c	-54.90	1.10	DangsuB	UAUUUGCAGAUGUAGCAUCAUCAAGAUUCACAUAUGAAAGUGCAAAUGGUUUUGUUGGAUUUUGAUCUGAUCGAUGCAAAUCUAAGUUCUCCAUAGGUCUUUUGAACUGAGAAUCUUGAUGAUGCUGCAUCAGCCAUAA
pyr-4731	GUAGCAUCAUCAAGAUUCAC	lja-MIR172b	-56.80	1.11	DangsuB	GGUCGUUAUUUGCAGAUGUAGCAUCAUCAAGAUUCACAUGCAAAUGCAAAUGCAAUCUAAGGCCAAGCCAUAGAUCUUUUGAAGUGAGAAUCUUGAUGAUGCUGCAUCAGCCAUGAACGGCU
pyr-939	UGCCUGGCUCCCUGAAUGCCA	ptc-MIR160e	-60.60	1.19	DangsuA	AAGAAUGGCCUGCCUGGCUCCCUGAAUGCCAUCUAGGAAGCUUGUCAAAGAGUGUUGGCAACCUUUCUAUUUGGCAUGAGGGGAGUCGAGCAGGCCAAUU
pyr-939	UGCCUGGCUCCCUGAAUGCCA	osa-MIR160f	-60.20	0.99	DangsuA	GGAUUAACGCUGCCUGGCUCCCUGAAUGCCAUCCGAGAAGCGUGCCGCUGUGGCCGGCUGCUUCCUGGUUGGCAUUGAGGGAGUCAUGCAGGGUUUGCUC
pyr-939	UGCCUGGCUCCCUGAAUGCCA	vvi-MIR160b	-46.80	1.00	DangsuA	AAUAUUGUUCUGCCUGGCUCCCUGAAUGCCAUCUAAGAAGCUUGUUAAAGAGUGUUGACAACCUUCCUAUUUGGCAUGAGGGGAGUCAAGCAGGCGAAACACUU
pyr-939	UGCCUGGCUCCCUGAAUGCCA	cpa-MIR160d	-43.80	0.97	DangsuA	UGCCUGGCUCCCUGAAUGCCAUCUAAGAAGCCUUGGCAAAGAGUGUUGGCAACCUUCUUACUUGGCAUGAGGGGAGUCAUGCAGG
pyr-939	UGCCUGGCUCCCUGAAUGCCA	ahy-MIR160	-59.80	1.27	DangsuA	AAAUAUUCGAAUUAUGUGUCUGCCUGGCUCCCUGAAUGCCAUGUAAGUUAGUUUGUUAAGAAAAGAUUAACAAACGUCUUAUAUGGCAUGAAGGGAGUCACGCAGGCGAUUCAUUUUGAAACAUAU
pyr-939	UGCCUGGCUCCCUGAAUGCCA	cme-MIR160d	-43.80	0.84	DangsuA	UAUGCCCCCUGCCUGGCUCCCUGAAUGCCAACUACGAAGGCUUUGCUAAAAGUUCUUAUUCGCAUCCUUCUUAAUUGGCAUCACGGGAGUCAUGCAGGCACCUUUA
pyr-939	UGCCUGGCUCCCUGAAUGCCA	mtr-MIR160c	-51.30	1.05	DangsuA	UCGCUUGCCUGGCUCCCUGAAUGCCAUCUGAGAAGCUUGUCAAAACGAUUGGCAACCUUUCCAUUUGGCAUGAAGGGAGCCAUGCAGGCUGC
pyr-939	UGCCUGGCUCCCUGAAUGCCA	rco-MIR160c	-44.60	0.95	DangsuA	GUAUCUGCCUGGCUCCCUGAAUGCCAUCUAAGAAGCUUGUCAAACAGUGUUGGCAAUUUUCCUAUUUGGCAUGAGGGGAGUCAUGCAGGCCCGU
pyr-939	UGCCUGGCUCCCUGAAUGCCA	ptc-MIR160f	-52.00	0.96	DangsuA	AAGAAUGGUCUGCCUGGCUCCCUGAAUGCCAUCUAGGAAGCUUGUCAAAGAGUGUUGGCAACCUCUCUAACUGGCAUGAGGGGAGUCACGCAGGCCCAAC
pyr-939	UGCCUGGCUCCCUGAAUGCCA	vvi-MIR160a	-52.40	0.99	DangsuA	GGGGUUGAUCUGCCUGGCUCCCUGAAUGCCAUCUAAGAAGCUUGUCAAGGUUGUUGACUCUCUUCCUAGUUGGCAUCAGAGGAGUCAUGCAGGCCCCAACAUU
pyr-939	UGCCUGGCUCCCUGAAUGCCA	tcc-MIR160a	-61.50	1.02	DangsuA	ACCUGGGAAUGGGAUUGUUCUGCCUGGCUCCCUGAAUGCCAUCUAAGAAGCUUGUCAAAGAGUGUUGGCUGCCUUCUUACAUGGCAUGAGGGGAGUCAUGCAGGCUUAACAAUCCCAAGUUA
pyr-939	UGCCUGGCUCCCUGAAUGCCA	bdi-MIR160e	-65.70	0.82	DangsuA	UAAGGUAAUUAAUGGGUGAUGUUGCCUUCCUGCCUGGCUCCCUGAAUGCCAUCUGAGAAGCACACCACCGUGCCUGGCGUGGCUCCUGGUUGGCAUUGAGGGAGUCAUGCAGGGUUGCAGGUACGUCCUCGCUUACUCCCUUCA
pyr-939	UGCCUGGCUCCCUGAAUGCCA	mes-MIR160e	-55.30	1.20	DangsuA	GCCUGCCUGGCUCCCUGAAUGCCAUCUAAGAAGCUUGUCAAAGAAUGUUGGCAGCCUUCUUACUUGGCAUGAAGGGAGUCAAGCAGGC
pyr-939	UGCCUGGCUCCCUGAAUGCCA	mes-MIR160f	-50.50	1.03	DangsuA	UUGUUCCUGCCUGGCUCCCUGAAUGCCAUCUAAGAAGCUUGUCAAAGGAUGUUGGCAACCUUCCUACUUGGCAUGAGGGGAGUCAUGCAGGCUCAA
pyr-939	UGCCUGGCUCCCUGAAUGCCA	sbi-MIR160f	-57.70	0.87	DangsuA	UGCCUGGCUCCCUGAAUGCCAUCCGAGAGAAGCAAUGCCAUCGUGUCCAUGGCGUGCCUCCCGGUUGGCGUUGAGGGAGUCAUGCAGGUUGCUUGCAUUGCCUCAGCAGC
pyr-3012	GGAUUGAGCCGCGUCAAUAUC	zma-MIR171m	-47.10	1.02	DangsuA	GUAUUGGCGCGCCUCAAUCCGAAGGCGUGGCUGAUAGAUUGGCGCGGCAGCCAUGUUCUUGGAUUGAGCCGCGUCAAUAUCU
pyr-3012	GGAUUGAGCCGCGUCAAUAUC	zma-MIR171l	-48.20	1.07	DangsuA	GUAUUGGCGUGCCUCAAUCCGAAGGCGUGGCUGACUGGCGCGGCAGCCAUGUUCUUGGAUUGAGCCGCGUCAAUAUCU
pyr-3124	UGAUAGAAGAGAGUGAGCAC	sly-MIR156e	-60.10	1.47	DangsuB	UGGUGGUGAUAGAAGAGAGUGAGCACACAUGGUGUUUUCUUGCAUGAUGUUUAUAUAUAUAUAUGCUUGAAACUAUGUGUGCUUACUCUCUAUCUGUCACCCCCA
pyr-2509	GUGGCAUCAUCAAGAUUCACA	dpr-MIR172b	-37.50	1.10	DangsuB	UCUGGCGUGGCAUCAUCAAGAUUCACAUGAAGCUAAUUCUGAAGAUGAUCAUGAGAAUCUUGAUGAUGCUGCAUCGGC
pyr-2509	GUGGCAUCAUCAAGAUUCACA	ath-MIR172a	-41.00	0.91	DangsuB	UGCUGUGGCAUCAUCAAGAUUCACAUCUGUUGAUGGACGGUGGUGAUUCACUCUCCACAAAGUUCUCUAUGAAAAUGAGAAUCUUGAUGAUGCUGCAUCGGC
pyr-2509	GUGGCAUCAUCAAGAUUCACA	osa-MIR172a	-48.90	0.98	DangsuB	GUGUUUGCGGGCGUGGCAUCAUCAAGAUUCACAUCCAUGCAUAUAUCACAAGACGCACAUAUACAUCCGAUUUGGCUGAGAAUCUUGAUGAUGCUGCAUCCGCAGACAA
pyr-2509	GUGGCAUCAUCAAGAUUCACA	lus-MIR172f	-54.30	1.02	DangsuB	GCGUGAGUCGUUGUUUGCUGGCGUGGCAUCAUCAAGAUUCACAUGCAAAGCUUCAUUUUGAGAAAUGGACUGUUGAGAAUCUUGAUGAUGCUGCAUCGGCAAUCGAGGACUACAUAC
pyr-2509	GUGGCAUCAUCAAGAUUCACA	lus-MIR172d	-60.90	0.83	DangsuB	GCGAGCGUGAGUCGUUGUUUGCUGGCGUGGCAUCAUCAAGAUUCACAUGUAAAGCUAGUAGCUAAUACUACCCCGGCCAGUAGUAGGACAUGGACUGAUGAGAAUCUUGAUGAUGCUGCAUCGGCAGUCGACGACUGCAUACGAAAAGU
pyr-2509	GUGGCAUCAUCAAGAUUCACA	tcc-MIR172d	-49.00	1.00	DangsuB	GGAGCAGUCGUUGUUUGCAAAUGUGGCAUCAUCAAGAUUCACAUGCAACGUACAUAUAUAUUUAUAUAUAUUAUAUGGUUUUGGCCUGAGAAUCCUGAUGAUGCUGCAUUGGCAAUGAAUGGCUAGAUG
pyr-2509	GUGGCAUCAUCAAGAUUCACA	aly-MIR172a	-56.60	0.80	DangsuB	GGAGCCACGGUCGCUGUUUGCUGCUGUGGCAUCAUCAAGAUUCACAUCUGUUGAUGGACGGUGGUGAUUCGCUCUCCCCAAAGUUCUCUAUGAAAAUGAGAAUCUUGAUGAUGCUGCAUCGGCAAUCAACGGCUAUUCUUUUUCUCUCC
pyr-1504	UGCCAAAGGAGAUUUGUCCGG	ptc-MIR399j	-41.50	0.81	DangsuB	UGCAUUACAGGGCAAGACCUCCAUUGGCAGGCAGCCACUAAAGCAUGCAUUUAAAUUAUGCGUUCUUUUAAGUGUGCCCUCUGCCAAAGGAGAUUUGUCCGGCAAAUCUUCU
pyr-1504	UGCCAAAGGAGAUUUGUCCGG	bna-MIR399c	-44.30	1.03	DangsuB	AUUACAGGGCAAGAUCUCCUUUGGCAGGAAUCCAUUACUUCAGUCUUACAUAUGCAUAUAUGUUUGUGGUGAGCUCUCUGCCAAAGGAGAUUUGUCCGGUAAU
pyr-820	UAAAGCUGCCAGCAUGAUCUGG	sly-MIR167b	-74.90	0.92	DangsuB	UCUCACUUCUGUAUGUUGGUUUUUUGAGAGGUUAAAGCUGCCAGCAUGAUCUGGUAAGAACAAAAUCCUAUUAUAUUUCAUCUAUAUUUUCUUAUAAAAAGAAGAAAUGAAUUUAAAUUUGAAUUUUUUGUAAAAAAAAAAUGUUGAGGUUUUUAAUUUCCUUCUUUUGGAUUUGAAAAAAAGAAAAUUAAAUUUUUGUAAGGAUUUUAUUUCUUUGAAGAAAAUAUAGAUAGAUAGCUUUGGUUCCAUCAGGUCAUCUAGCAGCUUCAAUCACUCACCAACAAUACACACAAAGGA
pyr-1395	UGCCAAAGGAGAAUUGCCC	tae-MIR399	-56.80	0.78	DangsuB	UCGUGUGUGAAUCACAGGGCGCUUCUCCCUUGGCACGGUGGCAUGCAUGUACAUAUGAUGGUGGUAGCCUGGUGAGCGUGCGGUGCAGCUUGCUAGCAAGCCGUGCGUGCCAAAGGAGAAUUGCCC
pyr-1395	UGCCAAAGGAGAAUUGCCC	ssl-MIR399	-39.00	1.08	DangsuB	UAGGGCACUUACUCCUUUGGCAGUAGCAUAGUAAAUUGUGAAUAUUUUUUUUUUUCUAUUUCACAUAGCUCACUGCCAAAGGAGAAUUGCCCGG
pyr-2752	UGCCGAAGGAGAUUUGUCCUG	vvi-MIR399f	-38.50	0.71	DangsuB	GUUGCAUUAGAGGGCCAAAUCUGCUUUGGCAUGAAGCCCAUUUAGCAGGCUCGUCUGUGUCUGCAGUCUUCUCGCUGCCGAAGGAGAUUUGUCCUGCAAUUCUUCUG
pyr-858	UACAAUUAUUUAGGAACGGAG	hvu-MIR5049d	-45.90	1.35	DangsuA	AUUCUACUUCCUCUGUACCAAAAUAAUUGCAGUUGGAGAGAAAUAGACUAGUAUUUCUCCCCAACUACAAUUAUUUAGGAACGGAGGGAGAAUUUU
pyr-1884	UGAGCCGUGCCAAUAUCACAU	smo-MIR171b	-39.10	0.81	DangsuB	UGUGUCUGUGAUAUUGACAAGGCUCAAUCAGGCUGCAAUGCUACUCGAGCUAAUUAGUGAUGCUGCCAGCUUGAGCCGUGCCAAUAUCACAUAGAUAGCUAGC
pyr-1884	UGAGCCGUGCCAAUAUCACAU	gma-MIR171q	-47.90	1.11	DangsuB	UGAGAACUUGAGAUAUUGGUGCGGUUCAAUCAGAAGGCAGUGUUUUAUGAUCCAAAAACUCUGUGUUAUUUGAUUGAGCCGUGCCAAUAUCACAUGUAAUUCAUCUCGG
pyr-1884	UGAGCCGUGCCAAUAUCACAU	pde-MIR171	-53.80	1.25	DangsuB	GAAAGAAUGUGAUGUUGGCUAGGCUCAAUCGGAUUGUAACGCCCACGGAAUUUGGUCUUGUGAUCUGAUUGAGCCGUGCCAAUAUCACAUUCUAAC
pyr-1884	UGAGCCGUGCCAAUAUCACAU	gma-MIR171c	-46.50	1.19	DangsuB	UUAAGAACUUGAGAUAUUGGUGCGGUUCAAUCAGAAGGCAGUGUUUUAUGAUCCAAAAGCUCUGUGUUAUUUGAUUGAGCCGUGCCAAUAUCACAUGUUAUUGA
pyr-1884	UGAGCCGUGCCAAUAUCACAU	gma-MIR171f	-43.40	1.21	DangsuB	GAGAUAUUGGUACGGUUCAAUCAGAAGGCAGUGCUUUAUGAUUUCAAAGCUCUCUUAUUUGAUUGAGCCGUGCCAAUAUCACAUGCAAAC
pyr-1884	UGAGCCGUGCCAAUAUCACAU	tcc-MIR171g	-50.60	1.01	DangsuB	GAUUUCUUAGUUGAAAAUUUGAUGUUGGCACGGUUCAAUCGGAUCAAAUCUCUCAGUGGCUGAGUCCUUUAGUCUGAUUGAGCCGUGCCAAUAUCACAUUCAGUCACUGCAUCGG
pyr-1884	UGAGCCGUGCCAAUAUCACAU	gma-MIR171o	-48.20	1.24	DangsuB	UAAGGGCUUGAGAUAUUGGUACGGUUCAAUCAGAAGACAGUGCUUUAUGAUUCUAAAGCUCUCUUAUUUGAUUGAGCCGUGCCAAUAUCACAUGCAAACUUU
pyr-677	CGAGCCGAAUCAAUAUCACU	mtr-MIR171h	-36.40	0.93	DangsuB	AAGUAGACAGGAGUGGUGUUGUUUCUGCUCAUCUUAUUAAAUAAUGAAUGAAUGAAUGACAUUUGCUUACUUAUAAGACGAGCCGAAUCAAUAUCACUCCAGUACACCU
pyr-677	CGAGCCGAAUCAAUAUCACU	ghr-MIR479	-43.30	1.14	DangsuB	GGAGGAGUAGACACGACGUGAUAUUGGUUCGGCUCAUCUUAUUGUGAUUAAAAAUUUCAAGGCGAGCCGAAUCAAUAUCACUCAUGUAUGCUUUUUU
pyr-677	CGAGCCGAAUCAAUAUCACU	ptc-MIR171m	-42.20	0.90	DangsuB	GAAGCAGACAUGGCGUGGUAUUGAUCCGGCUCAUCUUCUGUAUUUGCAUCAGAAGUUCUUCGCUGAAGACGAGCCGAAUCAAUAUCACUCUUGUACGCUUC
pyr-677	CGAGCCGAAUCAAUAUCACU	ppe-MIR171d	-41.90	0.72	DangsuB	CAAGUAGACAUGGUGUGAUAUUGGUUCGGUUCAUAUCUUUUAUACUUUUUGGAUAUAUCCAUCCAUCCAUUCAUCCAUCCAUCCAUCCAUCACACUUCACGAAUCACAAACAAAGAUGACGAGCCGAAUCAAUAUCACUCUUGUAUGCUUG
pyr-677	CGAGCCGAAUCAAUAUCACU	ptc-MIR171j	-42.10	0.92	DangsuB	GAAGCAGACAUGGCGUGGUAUUGAUCCGGCUCUUCUUCUGUAUUUGCAUCAGAAGUUUUUCGCUGAAGACGAGCCGAAUCAAUAUCACUCUUGUACGCUUC
pyr-677	CGAGCCGAAUCAAUAUCACU	gma-MIR171b	-35.80	0.99	DangsuB	UAGACACGGCGUGAUAUUGGUACGGCUCAUCUUAAUUCAACCAUUAUAUCAACAAUUGAGACGAGCCGAAUCAAUAUCACUCUUGUUUGCUU
pyr-677	CGAGCCGAAUCAAUAUCACU	ptc-MIR171l	-49.90	1.00	DangsuB	GGAGAAGUAGACACGGUGUGAUAUUGGUCCGGCUCAUCUUCUGUGCAUAAGCAUCUGAAGUUCUUCACUCAUGAAGACGAGCCGAAUCAAUAUCACUCUUGUAUGCUUCUUC
pyr-677	CGAGCCGAAUCAAUAUCACU	csi-MIR479	-48.60	0.93	DangsuB	AUUGGAGAAGUAGACAUGGUGUGAUAUUGGUUCGGCUCAUCUUAAUUAAUAGAUUCAUAUUUCAGCCCUUAAGGUUCUUACAUGUAUAUAUCUAGACGAGCCGAAUCAAUAUCACUCUUGUAUGCUUCUUUCUUUUGAUUUUGCACC
pyr-677	CGAGCCGAAUCAAUAUCACU	gma-MIR171h	-46.00	0.82	DangsuB	GCAAAAGUAGACACGGCGUGAUAUUGGUACGGCUCAUCUUAAUUCAACCACUAUAUCAACGAUUGAGACGAGCCGAAUCAAUAUCACUCUUGUUUGCUUCAUUGCAUAUAUAUAUAUACUAGCAGCUUUUUCUUUAGAAACCAAACUAUGC
pyr-677	CGAGCCGAAUCAAUAUCACU	csi-MIR171b	-53.70	0.87	DangsuB	CAGGCAGAGAAAGCACUUCUUGGCGAUUGGAGAAGUAGACAUGGUGUGAUAUUGGUUCGGCUCAUCUUAAUUAAUAGAUUCAUAUUUCAGCCCUUAAGGUUCUUACAUGUAUAUAUCUAGACGAGCCGAAUCAAUAUCACUCUUGUAUGCUUCUUUCUUUUGAUU
pyr-677	CGAGCCGAAUCAAUAUCACU	mtr-MIR171g	-37.72	0.77	DangsuB	GCUUCAGCUGCAAAAGUAUACAUGGCGUGAUAUUGAUCCGGCUCAUCUAUAUCUUCAAGUUCAAUCAUCCAUAUUCAUAUCAAUUUCAGACGAGCCGAAUCAAUAUCACUCUUGUUUGCUUCAUUGCAUAUUAAUU
pyr-4074	CCGUUGAGUGCAGCGUUGAUG	hvu-MIR397a	-74.20	0.98	DangsuB	CGCAGAGGUGCCGUUGAGUGCAGCGUUGAUGAACCGUCCGGCCAUGGCCCGUCCGCCUCCACCGAGGCCGGAGCGGUUCACCGGCGCUGCACGCAAUGACGCCUCUGCUUUCU
pyr-2992	UGAAGUGUUUGGGGGAACUUU	gma-MIR395f	-46.70	0.88	DangsuA	GCUGUCUCUUGGAGUUCCUCUGAGCACUUCACGCGUGGGGCUAGUUCUAUUCAAUAUUACCAUUUAGAUAGAAUAGUCCUCAUCACUGAAAUGAAGUGUUUGGGGGAACUUUUGGGUACAAC
pyr-2992	UGAAGUGUUUGGGGGAACUUU	gma-MIR395g	-49.40	0.90	DangsuA	GGUUGUCUCUUGGAGUUCCUCUGAACACUUCACACGUGGGACUAGAGUAGUGGUAUUGUAUCCUUUAGAUCAUAGAAUAGUCCUCAUCAUCACCAAGUGAAGUGUUUGGGGGAACUUUUAGGUACAAC
pyr-2992	UGAAGUGUUUGGGGGAACUUU	gma-MIR395d	-47.80	0.92	DangsuA	GCUGUCUCUUGGAGUUCCUCUGAGCACUUCACGUACGUGUGUGGCUAGUUCUAUUCUGUAUUACCCUUAGAUAGAAUAGUCUUAAUUAAGUGAAGUGUUUGGGGGAACUUUCGGGAACAAC
pyr-2992	UGAAGUGUUUGGGGGAACUUU	gma-MIR395e	-46.30	0.99	DangsuA	GCUGUCUCUUGGAGUUCCUCUGAGCACUUCACGAAUGACCUAGUUCUAUUUGGUAUUACCCUUUAGAUAGAAUAGUCUUAUAUAAGUGAAGUGUUUGGGGGAACUUUUGGGUACAAC
pyr-1843	UGUCGCAGGAGAGAUGGCGCUA	ptc-MIR3627b	-65.70	1.00	DangsuB	GGGGGUUUCUUGUCGCAGGAGAGAUGGCGCUAGCUAACCAUGGUCAUAUCAUAUAUAUCAUAUGGCAAGUAUUACUUGCUCUUUGUAUGUAUCAGCUGUAAAGAUAGCUCAGCUAAAGCCAUCCUCCUGCGACUGGACACCCUG
pyr-713	GGCAGUCUCCUUGGCUAUU	bna-MIR169g	-77.40	1.05	DangsuB	GAGAAACGGUGACAUGAAGAAUGAGAAGUUGUGUGGUAGCCAAGGAUGACUUGCCUGCGUCUUUAACACCAUAUCAAAGACUUUAUCGAUAGUCUCUGAGUUGGUUAGGCUGUAGGCAGUCUCCUUGGCUAUUCAGACACUCCUCUUUCUCCUCAUUUCACAUUUCUC
pyr-713	GGCAGUCUCCUUGGCUAUU	bna-MIR169l	-82.30	1.07	DangsuB	CAUGGCGAAAAGAGUCGUGUUUAGUAGCCAAGGAUGACUUGCCUGCUCUUGUUCACCUCCACGAUUCAACUUUAUACGUUGAAGGGUUUUGGAUUAUUGUGCAUUCAACAUGUAUAAUAAUUUGAAAUCAUGUUGAAUCUUUGUGGGUUAGGUUUCAGGCAGUCUCCUUGGCUAUUUUGACAUACUUUUUUCAUCCAUG
pyr-713	GGCAGUCUCCUUGGCUAUU	aly-MIR169h	-78.60	1.01	DangsuB	UAGAAAAUCAUAUAAGAGAAAAUGGUGACAUGAAGAAUGAGAACUUGUGUGGUAGCCAAGGAUGACUUGCCUGCGUUUUAACAAUACAAUAUCAAAGACUACUCGAUCGAUCGAUAGUCUUAGAGUUGGUUAGUCGUCAGGCAGUCUCCUUGGCUAUUCAAACAAUUCUUGUUCUCCUCAUUUCACAUCUCUCUUUCGUUUUUUG
pyr-713	GGCAGUCUCCUUGGCUAUU	ath-MIR169h	-79.00	1.05	DangsuB	UCAUAUAAGAGAAAAUGGUGACAUGAAGAAUGAGAACUUGUGUGGUAGCCAAGGAUGACUUGCCUGCGUUUUAGACCAUAUAUAUCAAAGACUCACUCGAUCGAUAGUCUUAGAGUUGGUUGGUCGUCAGGCAGUCUCCUUGGCUAUUCAAACAAUUCUCAUUCUCUUCAUUCACAUUUCUCUUUUUUGG
pyr-713	GGCAGUCUCCUUGGCUAUU	bna-MIR169j	-67.00	1.05	DangsuB	GUGUUUAGUAGCCAAGGAUGACUUGCCUGCUCUUGUUCACCUCCACGAUUCAACUUUAUACGUUGAAGGGUUUUGGAUUAUUGUGCAUUCAACAUGUAUAAUAAUUUGAAAUCAUGUUGAAUCUUUGUGGGUUAGGUUUCAGGCAGUCUCCUUGGCUAUUUUGACAU
pyr-133	GGACUGUUGUCUGGCUCGAGG	ath-MIR166b	-51.10	0.98	DangsuB	UUGAGGGGACUGUUGUCUGGCUCGAGGACUCUUAUUCUAAUACAAUCUCAUUUGAAUACAUUCAGAUCUGAUGAUUGAUUAGGGUUUUAGUGUCGUCGGACCAGGCUUCAUUCCCCCCAA
pyr-133	GGACUGUUGUCUGGCUCGAGG	aly-MIR166b	-58.70	0.95	DangsuB	AGAGGGAUUUUUCUUUUGAGGGGACUGUUGUCUGGCUCGAGGUCUCUUAUUCUAAUACAAUCUCAUUUCAAUAGUCUCAGAUCUGAUGAUUGAUUAGGGUUUUAGCAUCUCGGACCAGGCUUCAUUCCCCCCAAUUAUUACUCCCUCU
pyr-133	GGACUGUUGUCUGGCUCGAGG	bna-MIR166d	-44.30	0.69	DangsuB	GUGGUGCGGUUUAGGGCUGAGAGGACUGUUGUCUGGCUCGAGGUCAUGAAGAAUGAAACCUAAACCUAAAUGAUUCUCGGACCAGGCUUCAUUCCCCCCAGCCGUUUUAUCGCCAUAUAUAUGCCCAC
pyr-133	GGACUGUUGUCUGGCUCGAGG	ath-MIR166a	-67.60	0.84	DangsuB	AGGGGCUUUCUCUUUUGAGGGGACUGUUGUCUGGCUCGAGGACUCUGGCUCGCUCUAUUCAUGUUGGAUCUCUUUCGAUCUAACAAUCGAAUUGAACCUUCAGAUUUCAGAUUUGAUUAGGGUUUUAGCGUCUUCGGACCAGGCUUCAUUCCCCCCAAUUGUUGCUCCCU
pyr-2063	AAACAACAAUAUAACAUUUCAAA	osa-MIR2920	-25.40	0.38	DangsuA	CAAGAGGGUUCCUAAAAUAUUAUAGACAAAACAAGUCACUACAUAAUACAUAUAAGCAGAUACAGAAACAAGUUUAUUGUCCUAUACCAAAUUUCAAAAUUCAAACAACAAUAUAACAUUUCAAAUAUUAGCUAGUUUACAUUGGGUAUUCAACUAUUCAAUAAACACCGUGGAUACCGCAUAUACUAUCACCAUUUGGCCAAUGGCCAG
pyr-2262	AUUGGAGUGAAGGGAGCUCGA	ptc-MIR159c	-94.50	0.88	DangsuB	GAGGCUCAAUGGAGCUCUCCCCACUCCAUGCCUGAAAGGAGUUCGAUGGUAGACCAUGGCUGCUAGUUCAUGAAUACCCUUGGGUGCGCAGAAUUAGCAACGGUGCAGGCGAAGUUGCGCAGGCUAAGGGUCUGCAUGACCUAGGAGACGUGGUUACCCUGACCCUUUUUGUAUUGGAGUGAAGGGAGCUCGAUGGUCUUU
pyr-2262	AUUGGAGUGAAGGGAGCUCGA	lus-MIR159a	-85.00	0.99	DangsuB	GAGCUCUCUUCACUCCAUUUCUGAAAGGAGGUGAUAGGUAUGCCAUGGCUAGCAGGUUCAUGAUUACCCCUAGCCAUUAGUCGAGUUUGAAGAGCGUAGGCUACGGGUUCGCAUGAGUCUGGGAGGCAUGGCUACUCUGAUCUUUUUGGCAUUGGAGUGAAGGGAGCUCGA
pyr-2265	UGAAGCUGCCAACAUGAUCUG	ptc-MIR167h	-40.90	1.14	DangsuA	CGCUAUUAGUUGAAGCUGCCAACAUGAUCUGAGCUUUCCUUAAUUUUCCUAUACAGGAAAGACUAGAUCAUGUGGCAGUUUCACCUAUUGA
pyr-2545	UGGGGACUCGAAGACGAUCAUAU	peu-MIR2916	-27.40	0.57	DangsuA	UGGGGACUCGAAGACGAUCAUAUACCAUCCUAGUCUCAACCAUAAACGAUGCCGACCAGGGAUUGGCGGAUGUUGCUUCUAGGAGUCCGCCA
pyr-317	UGCAUUUGCACCUGCACCUC	tcc-MIR530a	-74.20	0.92	DangsuA	CCAACAAGUCUCCAUUUAUCUGCAUUUGCACCUGCACCUCUUUCUCUACACUUCCAGCAGCCAGGGAGAUGAACAACAUUCUCCAUGGACGGUUGCCGAAAUCUUGUUGGUUGGACGGGGAGAGGUGCAGAUGCAGGUGCAGACAAAUGGCCUCUUGGUUUUA
pyr-317	UGCAUUUGCACCUGCACCUC	ppe-MIR530	-58.70	0.99	DangsuA	GAUAGCCAAGAUGGUUUCAUUUAUCUGCAUUUGCACCUGCACCUCUUUUGGUCUUUACUGGUUUUCUCAUGCACUGAUGAACUCAGAGAUCCAUGCAUAGGUGCAAGUGUAAGUGCAGACAAAUGCCUUCUUGGUUUUUUC
pyr-1363	UGCCAAAGGAGAAUUACCCUG	bdi-MIR399a	-36.80	0.69	DangsuB	CAGUGCAGUUCUCCUCUGGCAUGGAUGCUAAUGUAGCAGGCCCUGCACAAUGGACUAUGCUAUCACUGUCCCUGCCAAAGGAGAAUUACCCUGCCAGUGC
pyr-15	GAGGUGAGCCGAGCCAAUAUC	sbi-MIR171c	-44.40	0.84	DangsuB	AGAACGAGACGACAUGGCAUGGUAUUGACUUGGCUCAUCUCUCAUCCACAGCAAACUUCACAAGUGCCUGAGGUGAGCCGAGCCAAUAUCACUUCAUGUCAUCUAGCGU
pyr-15	GAGGUGAGCCGAGCCAAUAUC	zma-MIR171g	-48.70	0.81	DangsuB	AGAACGAGGCGACAUGGCAUGGUAUUGACUUGGCUCAUCUCUCGCCCACACCAGAAUCCACAAGUGCCGGAGGAGGUGAGCCGAGCCAAUAUCACUUCAUGUCAUCUAGCGU
pyr-15	GAGGUGAGCCGAGCCAAUAUC	osa-MIR171g	-45.00	0.98	DangsuB	GACAUGGCAUGGUAUUGACUUGGCUCAUCUCAGCAACAGCAAACUGCAUGCAGCGCUGGAGGUGAGCCGAGCCAAUAUCACUUCAUGUC
pyr-1184	UGCCUGGCUCCCUGAAUGCCAUC	ptc-MIR160e	-60.60	1.19	DangsuA	AAGAAUGGCCUGCCUGGCUCCCUGAAUGCCAUCUAGGAAGCUUGUCAAAGAGUGUUGGCAACCUUUCUAUUUGGCAUGAGGGGAGUCGAGCAGGCCAAUU
pyr-1184	UGCCUGGCUCCCUGAAUGCCAUC	osa-MIR160f	-60.20	0.99	DangsuA	GGAUUAACGCUGCCUGGCUCCCUGAAUGCCAUCCGAGAAGCGUGCCGCUGUGGCCGGCUGCUUCCUGGUUGGCAUUGAGGGAGUCAUGCAGGGUUUGCUC
pyr-1184	UGCCUGGCUCCCUGAAUGCCAUC	vvi-MIR160b	-46.80	1.00	DangsuA	AAUAUUGUUCUGCCUGGCUCCCUGAAUGCCAUCUAAGAAGCUUGUUAAAGAGUGUUGACAACCUUCCUAUUUGGCAUGAGGGGAGUCAAGCAGGCGAAACACUU
pyr-1184	UGCCUGGCUCCCUGAAUGCCAUC	cpa-MIR160d	-43.80	0.97	DangsuA	UGCCUGGCUCCCUGAAUGCCAUCUAAGAAGCCUUGGCAAAGAGUGUUGGCAACCUUCUUACUUGGCAUGAGGGGAGUCAUGCAGG
pyr-1184	UGCCUGGCUCCCUGAAUGCCAUC	mtr-MIR160c	-51.30	1.05	DangsuA	UCGCUUGCCUGGCUCCCUGAAUGCCAUCUGAGAAGCUUGUCAAAACGAUUGGCAACCUUUCCAUUUGGCAUGAAGGGAGCCAUGCAGGCUGC
pyr-1184	UGCCUGGCUCCCUGAAUGCCAUC	rco-MIR160c	-44.60	0.95	DangsuA	GUAUCUGCCUGGCUCCCUGAAUGCCAUCUAAGAAGCUUGUCAAACAGUGUUGGCAAUUUUCCUAUUUGGCAUGAGGGGAGUCAUGCAGGCCCGU
pyr-1184	UGCCUGGCUCCCUGAAUGCCAUC	ptc-MIR160f	-52.00	0.96	DangsuA	AAGAAUGGUCUGCCUGGCUCCCUGAAUGCCAUCUAGGAAGCUUGUCAAAGAGUGUUGGCAACCUCUCUAACUGGCAUGAGGGGAGUCACGCAGGCCCAAC
pyr-1184	UGCCUGGCUCCCUGAAUGCCAUC	vvi-MIR160a	-52.40	0.99	DangsuA	GGGGUUGAUCUGCCUGGCUCCCUGAAUGCCAUCUAAGAAGCUUGUCAAGGUUGUUGACUCUCUUCCUAGUUGGCAUCAGAGGAGUCAUGCAGGCCCCAACAUU
pyr-1184	UGCCUGGCUCCCUGAAUGCCAUC	tcc-MIR160a	-61.50	1.02	DangsuA	ACCUGGGAAUGGGAUUGUUCUGCCUGGCUCCCUGAAUGCCAUCUAAGAAGCUUGUCAAAGAGUGUUGGCUGCCUUCUUACAUGGCAUGAGGGGAGUCAUGCAGGCUUAACAAUCCCAAGUUA
pyr-1184	UGCCUGGCUCCCUGAAUGCCAUC	bdi-MIR160e	-65.70	0.82	DangsuA	UAAGGUAAUUAAUGGGUGAUGUUGCCUUCCUGCCUGGCUCCCUGAAUGCCAUCUGAGAAGCACACCACCGUGCCUGGCGUGGCUCCUGGUUGGCAUUGAGGGAGUCAUGCAGGGUUGCAGGUACGUCCUCGCUUACUCCCUUCA
pyr-1184	UGCCUGGCUCCCUGAAUGCCAUC	mes-MIR160e	-55.30	1.20	DangsuA	GCCUGCCUGGCUCCCUGAAUGCCAUCUAAGAAGCUUGUCAAAGAAUGUUGGCAGCCUUCUUACUUGGCAUGAAGGGAGUCAAGCAGGC
pyr-1184	UGCCUGGCUCCCUGAAUGCCAUC	mes-MIR160f	-50.50	1.03	DangsuA	UUGUUCCUGCCUGGCUCCCUGAAUGCCAUCUAAGAAGCUUGUCAAAGGAUGUUGGCAACCUUCCUACUUGGCAUGAGGGGAGUCAUGCAGGCUCAA
pyr-1184	UGCCUGGCUCCCUGAAUGCCAUC	sbi-MIR160f	-57.70	0.87	DangsuA	UGCCUGGCUCCCUGAAUGCCAUCCGAGAGAAGCAAUGCCAUCGUGUCCAUGGCGUGCCUCCCGGUUGGCGUUGAGGGAGUCAUGCAGGUUGCUUGCAUUGCCUCAGCAGC
pyr-4713	CAGCACCAUCAAGAUUCACA	bol-MIR172a	-43.40	1.01	DangsuA	CGUUUUUUGUAGGCGCAGCACCAUCAAGAUUCACAUGGAAAUUGAAAAAUCUCCUAAUUUUUAAUUAGGGUUUUGAUAUGUAUAUGAGAAUCUUGAUGAUGCUGCAUCAACAACCGACG
pyr-4713	CAGCACCAUCAAGAUUCACA	stu-MIR172b	-30.10	0.97	DangsuA	GCAGCACCAUCAAGAUUCACAUAGAAAAUAUGGACUAUGAAAUGAAAUAUGCCCAAUUUUUGAAUACAUGAGAAUCUUGAUGAUGCUGCAU
pyr-4713	CAGCACCAUCAAGAUUCACA	aly-MIR172b	-51.60	0.96	DangsuA	UAGCUCAUCUGUCGUUGUUUGUAGGUGCAGCACCAUCAAGAUUCACAUGAAAAUUGAUAAAUCUCCUAAAUUAGGGUUUUGAUAUGUAUAUGAGAAUCUUGAUGAUGCUGCAUCAACAAUCGACGGCUACAAAAUACCUAAAGCUG
pyr-4713	CAGCACCAUCAAGAUUCACA	bna-MIR172a	-40.20	1.09	DangsuA	UUUUGUAGGCGCAGCACCAUCAAGAUUCACAUGGAAAUUGAAAAAUCUCCUAAUUUUUAAUUAGGGUUUUGAUAUGUAUAUGAGAAUCUUGAUGAUGCUGCAUCAACAAC
pyr-4713	CAGCACCAUCAAGAUUCACA	sbi-MIR172c	-49.30	0.95	DangsuA	GUGCAGCACCAUCAAGAUUCACAUGGUCCAACUCAUGCAUCUUCAGUGAUGCUCAUGUGAUGGCUCGCAGUUGCUAUAUAUGCAUAUGUGAUGAGAUGAGAAUCUUGAUGAUGCUGCAU
pyr-4713	CAGCACCAUCAAGAUUCACA	zma-MIR172d	-34.00	0.97	DangsuA	GUGCAGCACCAUCAAGAUUCACAUCCCCAGCUCGAUCUGUGCAUGAUGAGAUGAGAAUCUUGAUGAUGCUGCAU
pyr-4713	CAGCACCAUCAAGAUUCACA	bra-MIR172a	-43.40	1.01	DangsuA	CGUUUUUUGUAGGCGCAGCACCAUCAAGAUUCACAUGGAAAUUGAAAAAUCUCCUAAUUUUUAAUUAGGGUUUUGAUAUGUAUAUGAGAAUCUUGAUGAUGCUGCAUCAACAACCGACG
pyr-4713	CAGCACCAUCAAGAUUCACA	osa-MIR172d	-55.30	0.91	DangsuA	AAACAGUCGGUGCUUGCAGGUGCAGCACCAUCAAGAUUCACAUCGAGUUCAUCCCUAAACGAGAUCGAGGUUGGCUGACUAUAUGUGAUGAGAAUCUUGAUGAUGCUGCAUCAGCAAACGCUCGACUACU
pyr-4713	CAGCACCAUCAAGAUUCACA	zma-MIR172b	-53.50	1.03	DangsuA	GUGCAGCACCAUCAAGAUUCACAUCGUCCAACUCAUGCAUCAUGCAUAUAUGCAUCUUCAAUGAUGCGUGCCUCGCAUGUGUGUGUAUAUAUAUAUGAUGAGAUGAGAAUCUUGAUGAUGCUGCAU
pyr-4713	CAGCACCAUCAAGAUUCACA	gma-MIR172g	-45.60	1.01	DangsuA	GCAGGUGCAGCACCAUCAAGAUUCACAUGCAAUUUACACCCUAUAAGAGAUUUUUGACAAAAUUUCUUUCCUAGGAGAGUUUUGACUUGAGAAUCUUGAUGAUGCUGCAUCAGC
pyr-4713	CAGCACCAUCAAGAUUCACA	lja-MIR172c	-47.30	1.18	DangsuA	AGUCGUUGUCUGCAGGUGCAGCACCAUCAAGAUUCACACACAAAUUAUAAGUGUUUUGGUGUUGAGAAUCUUGAUGAUGCUGCAUCAGCAAUAAACGAUU
pyr-4713	CAGCACCAUCAAGAUUCACA	cme-MIR172d	-45.20	0.98	DangsuA	GUUGGUGCAGCACCAUCAAGAUUCACAAAGGCUUUAAUUAUUAUUUACGUUUAAAUUCUCUUUCCUUAAUUUUAUUCAAAUUUAAAAAAGAAAAGAAAGAAAAAAGAAAAAAGCCUUUUCCUUUGGGAAUCUUGAUGAUGCUGCAUCGUCAAAUAC
pyr-3729	GCUCAUUUCUCUCUCUGUCAGC	ata-MIR156b	-59.40	1.08	DangsuA	AGGUGGAGGCUGACAGAAGAGAGUGAGCACACAUGGUGCCUUUCUUGCAUGGUGAAUUAAUGGGAGAAGUUCAUGCUUGAAGCUAUGUGUGCUCAUUUCUCUCUCUGUCAGCCAUUAUAACU
pyr-1983	CAGGGAAGAGGCAGAGCAUGG	lja-MIR408	-90.60	0.94	DangsuA	AUGUUAUUUUGCUGAUGUUGACAGGGAUGAGCUAAGUUGAUCUUGAUGGAGAGACAUGACAAUGGCAGGGAAGAGGCAGAGCAUGGAUGGAGCUAUCAACAAAAUAAAUUGAGAAUGGGAGAAGUUUGUUGUGGCUCUACUCAUGCACUGCCUUUUCCCUGGCCACGUCUCAGUCUCCGUUUCUCAUGAGAGCAUGUUAGGAUACACAGUAGAAAAAACAU
pyr-3925	GGAUAUUGGUACGGUUCAAUC	ptc-MIR171a	-48.50	1.18	DangsuA	UCAGAGAAAACGGGAUAUUGGUACGGUUCAAUCAGAAAGUAAUGCUCCCAAAAGUAUAGAGUACUAUUGUUUGAUUGAGCCGUGCCAAUAUCACGUACACUCAU
pyr-911	UUCCAUGAAAGUGUUUUUGGAU	stu-MIR6023	-96.10	1.12	DangsuA	AGCAGUAAUCUCUGAUCAUAUUCCAUGAAAGUGUUUUUGGAUAAGAUUUUUUACCAUAGUAAUCACAAAUACUAGAUGACCGUGCUCUUUUGGACAAUAAUUUCUGAUCAAAGCAUUUCCCUUCUAAAAUUCAAGAGAAUGCUUACGGUAGGUCCCUCAUCGAGUGUUUGUGAUUACUACAGUCAGGAAUCUUAUCCAAAGACAAGUCAUGGAAUAUGAGCCGAGAUUGGUGUCUA
pyr-309	GGAAUGUUGUCUGGUCCGAG	hvu-MIR166b	-62.40	1.02	DangsuA	GGGGAAUGUUGUCUGGUCCGAGACCUAACACCGGGCGGAAUGGCGGAUUCAGCUGCAGCUAAGCAAGCUAGGUGGGGGGUUUCGGACCAGGCUUCAUUCCCC
pyr-309	GGAAUGUUGUCUGGUCCGAG	osa-MIR166c	-72.70	1.01	DangsuA	GGCAGUUGAGGGGAAUGUUGUCUGGUCCGAGACCUAACACCGGGCGGAAUGGCGGAUUCAGCUGCAGCUAAGCAAGCUAGGUGGGGGGUUUCGGACCAGGCUUCAUUCCCCCCAACUCAACUGUU
pyr-2919	GGAAUCUUGAUGAUGCUGCA	cpa-MIR172a	-69.50	0.87	DangsuB	GAGCAUCAUCAAGAUUCACAAAAUUAAACACAUUAGGGCUAGUAGUGUGGGGUUUGUGGUGGUGGGUGACGGUGAUGGCCCCUUCUGCUCUUUUUUUUUUCAGUGGUCCCGUUGCUUAUUUCACUGCAACACCCUUGGCUCUCUCUCUUUGAUUAUGGGAAUCUUGAUGAUGCUGCA
pyr-2919	GGAAUCUUGAUGAUGCUGCA	cpa-MIR172b	-37.00	0.90	DangsuB	CGGCAUCAUCAAGAUUCACAACAAAACUUUUGUGAUGAUAAGCUCUUUUUAAUCGAUCGACUUGAUCAAAAGCUUCUCUCCGAAAUGGGAAUCUUGAUGAUGCUGCA
pyr-4451	GCUCUCUAGCCUUCUGUCAUC	aly-MIR157a	-54.10	1.08	DangsuA	GAGGCAUUGAGAGUGUUGACAGAAGAUAGAGAGCACAGAUGAUAAGAUACAAUUCGGAGCAGUUUCUUUGCAUCUUACUCCUUUGUGCUCUCUAGCCUUCUGUCAUCACCUUUUAUUUGCUUU
pyr-4451	GCUCUCUAGCCUUCUGUCAUC	ath-MIR157b	-55.40	0.94	DangsuA	UGGGAGGCAUUGAUAGUGUUGACAGAAGAUAGAGAGCACAGAUGAUAAGAUACAAUUCCUCGCAGCUUCUUUGCAUCUUACUCCUUUGUGCUCUCUAGCCUUCUGUCAUCACCCGUUAUUUGCCAUCACCCA
pyr-4451	GCUCUCUAGCCUUCUGUCAUC	atr-MIR156a	-80.40	1.01	DangsuA	AGGGUUUAUAUGUGAGGGAGUAAGUAAUAGAGAGAGGGGGUCUGGUGUUGUUGACAGAAGAUAGAGAGCACAUAAAGUAACGUGCAGUGGGCGUUUGCAUUUUAUUUUGUAUGUGCUCUCUAGCCUUCUGUCAUCACCUGCUCACCAUUCCCACCCAUCUUACUUCUCCAACAUAUUUCUAAUCCU
pyr-4451	GCUCUCUAGCCUUCUGUCAUC	ath-MIR157a	-46.00	1.07	DangsuA	GUGUUGACAGAAGAUAGAGAGCACAGAUGAUGAGAUACAAUUCGGAGCAUGUUCUUUGCAUCUUACUCCUUUGUGCUCUCUAGCCUUCUGUCAUCACC
pyr-799	AGGCUUGGUGCAGCUCGGGAA	osa-MIR168b	-37.10	0.63	DangsuA	UGGUCUUGUGAGGCUUGGUGCAGCUCGGGAACUGUUCUUGAUGGACUGGCAGGAACUCCAUGUCCACCACUGCCACUCCUGUGUUGUGGCAUUCCUCCUUGCCGUU
pyr-2452	AGAAGAGAGAGAGCACAGCUU	far-MIR529	-44.20	0.59	DangsuA	UGGUCGUGGCUGGCACCGUGGGUGGUGGUAUCCCAUGGCUGAGUACUUGACAGAAGAGAGAGAGCACAGCUUGAGUCGGCGGCGACCCCUGUGAGACACCCGCCUGGAGGGAGCUCUGGA
pyr-2083	UGCCAAAGGAGAUUUGCCCGG	rco-MIR399c	-36.80	0.77	DangsuB	UUACAGGGCAAAACCUUCAUUGGCAUGCUGCCAGACUAAGAUGUGGGACGCAUUCCUAUCGUGUGCAUCAUGCCAAAGGAGAUUUGCCCGGCGAUA
pyr-2083	UGCCAAAGGAGAUUUGCCCGG	csi-MIR399a	-51.80	0.77	DangsuB	CAUUGAGGUGCAUGCAUGCAGUUGCAUAUUACAGGGCAACAUCUCCAUUGGCAGGCUGCAUACUUAUUACAUCCAUCUCAUAUAUACGUAUGUUCUUCAGUCAGUGUGCCUUCUGCCAAAGGAGAUUUGCCCGGCAAUUCCUCUGCAUUUAUUUU
pyr-2083	UGCCAAAGGAGAUUUGCCCGG	mes-MIR399b	-40.90	0.97	DangsuB	CAGGGUAAACUCUCCAUUGGCAGGCAGCCACUUACAGAACUAAUUUGCAUUAUUUGUUUUAGUGUGCUCUCUGCCAAAGGAGAUUUGCCCGG
pyr-2083	UGCCAAAGGAGAUUUGCCCGG	bna-MIR399b	-49.20	1.12	DangsuB	AUUACAGGGCAAGAUCUCUAUUGGCAGGAAACCAUUACUUGACCUUUGCAUCUCUUUAUGCAUUGUUUUGUAGUGAGUUCUCUGCCAAAGGAGAUUUGCCCGGUAAU
pyr-2083	UGCCAAAGGAGAUUUGCCCGG	lus-MIR399e	-42.90	0.69	DangsuB	GCAACGAUCUUGUAUGGAUGCAUUACAGGGCAAUUACUCCCUUGGCAGAUAGCUAUAGUACUAGCUAAAUUGAGCAAACAAGUACAGUAAGCUCACUGCCAAAGGAGAUUUGCCCGGCAAUUCAACCCUAUUACGUACUAGC
pyr-2083	UGCCAAAGGAGAUUUGCCCGG	bna-MIR399a	-48.70	1.13	DangsuB	ACAGGGCAAGAUCUCUAUUGGCAGAAAACCAUUACUUAGAUCUUUGCAUCUCUUUCUGCAUUGAUUUGUAGUGAGUUCUCUGCCAAAGGAGAUUUGCCCGGU
pyr-2083	UGCCAAAGGAGAUUUGCCCGG	ath-MIR399f	-48.10	1.00	DangsuB	AUAUGCAUUACAGGGCAAGAUCACCAUUGGCAGAGAUCUAUUACUUCAUUCUUGCAUCAUAUGCAUAAAUGUUUGUGGUGAGCUCUCUGCCAAAGGAGAUUUGCCCGGUAAUUCUCUU
pyr-2083	UGCCAAAGGAGAUUUGCCCGG	ptc-MIR399b	-43.70	0.68	DangsuB	GGUGCAGUUGCAUUACAGGGCAAGCUUCCAUUGGCAUGCAGCCACUAAGACACGCAAUAUCUAACACUUGAUGCAUUCCUGUAGAGUGCGGCGCCAUGCCAAAGGAGAUUUGCCCGGCAAUUCUUC
pyr-2083	UGCCAAAGGAGAUUUGCCCGG	vvi-MIR399e	-42.90	0.79	DangsuB	GCAUAUUACAGGGCAAAUUAUCUUUUGGCAGGCAGCCACUUAGAGACACAGCCAAGCCAUGCAUUCUUGUAGUGUGCCCUCUGCCAAAGGAGAUUUGCCCGGCAAUUCUUCU
pyr-2083	UGCCAAAGGAGAUUUGCCCGG	bdi-MIR399d	-68.70	0.82	DangsuB	UGCGUGUGAAGGUGCAUUGCAGGGCAACUCCUCCGUUGGCAGAGGGACGACGGAUGGAUGUGGCCGGGGUUCUCCCUUGAAUCCUUGGUCCUGUCCGUCUGCCAAAGGAGAUUUGCCCGGCGAUUCACCACCCACUUCGACU
pyr-2083	UGCCAAAGGAGAUUUGCCCGG	tcc-MIR399b	-46.50	0.74	DangsuB	UUCAGGGUGCAACUGCAUUACAGGGCAAGAUUUCCAUUGGCAGGCAGCCACUUAUAUGUGCACCCAAACUCAUUCAUUCAUGUGGUGUGCCCUCUGCCAAAGGAGAUUUGCCCGGCAAUUCUUUUGUACUACUUA
pyr-2083	UGCCAAAGGAGAUUUGCCCGG	lus-MIR399c	-59.70	0.88	DangsuB	GUACUGUUGCAGUUGGGAAAUUACAGGGCAACUAUCUCUAUUGGCAGGCAGCCAUGCACUUAGAGACAUACUUAACUGUCUAAGUGCACCGUCUGCCAAAGGAGAUUUGCCCGGCGAUUCCUCUACUGCUUAUCGGAGC
pyr-2083	UGCCAAAGGAGAUUUGCCCGG	mes-MIR399c	-40.50	0.90	DangsuB	CAGGGUAAACUCUCCAUUGGCAGGCAGCCACUUACAGAACUAAUUUGCAUUGUUUGGUUUAGUGUGCCCUCUGCCAAAGGAGAUUUGCCCGG
pyr-2083	UGCCAAAGGAGAUUUGCCCGG	lus-MIR399a	-64.40	0.92	DangsuB	AGAAUGAAUGAGUGUCGGAGUUGAGAAAUCACAGGGCAAGUACCUCUAUUGGCAGGCAGUCACUUAGACAUAUGUACUAAUUUUUCAAUUUGUCUAAGUGCAUUGUCUGCCAAAGGAGAUUUGCCCGGCGAUUCUUCCACUGCUUAUCGAAACAUGUUCCGUCU
pyr-2083	UGCCAAAGGAGAUUUGCCCGG	cme-MIR399c	-52.80	0.89	DangsuB	AUUUCUGGGCAAUUACUCCAUUGGCAGUUGCCACCUUCCUUUUAAAACACACACACACUGACACAUACAUAUAUAUAUAUUAUAUAUUAUGUGAAAUCAUAUUGCCAAAUUUAAGGCAAUAACAAAAUCGCUACUGCCAAAGGAGAUUUGCCCGGUAAUGCUCC
pyr-2083	UGCCAAAGGAGAUUUGCCCGG	aly-MIR399a	-54.40	0.88	DangsuB	CAUGUGAGAUGGAUCAAAGGUGGAAAUGUAUUACAGGGUAAGAUCUCUAUUGGCAGGAAACCAUUACUUAGAUCUUUGCAUCUCUUUAUGCAUUGCUUUUAAGUGAGUUCUCUGCCAAAGGAGAUUUGCCCGGUAAUUCUUCUGCACCAAUAUAUUGAUAUG
pyr-2083	UGCCAAAGGAGAUUUGCCCGG	mes-MIR399d	-34.70	0.87	DangsuB	CAGGGUAAACUCUCCAUUGGCAGGCAGCCACUUACAGAAUCAAUAUGCAUUAUUUAUUUUAAUCUGCUCUCUGCCAAAGGAGAUUUGCCCGG
pyr-2083	UGCCAAAGGAGAUUUGCCCGG	mes-MIR399g	-39.60	0.82	DangsuB	CAGGGCAAAACCUCCAUUGGCAUGCAGCCACACUAAGAUUCUCUAUCCUUGUUGUGCAUUCCUAUAGUGUGCUCCAUGCCAAAGGAGAUUUGCCCGG
pyr-2083	UGCCAAAGGAGAUUUGCCCGG	rco-MIR399b	-42.90	0.89	DangsuB	UUACAGGGCAAAAUCUCCAUUGGCAUGGAACCACUAAGAUAUCCAAACCAAUCAAGCCAGGAUUUCAAUAGUGUGUGCCCUGCCAAAGGAGAUUUGCCCGGCAAUA
pyr-2083	UGCCAAAGGAGAUUUGCCCGG	tcc-MIR399d	-49.60	0.76	DangsuB	UCUCUGGUGCAGUUGCAUUACAGGGCAAAGAUCUCCAUUGGCAGGCUGCCACUUUGGGUCACGAACCGAAUUAUGUGUUCCUAUAGUGUGUCUUCUGCCAAAGGAGAUUUGCCCGGCAAUUCUUCCGCAUUGAUAU
pyr-2083	UGCCAAAGGAGAUUUGCCCGG	aly-MIR399h	-48.10	1.09	DangsuB	AUUACAGGGCAAGAUCUCUAUUGGCAGGAAACCAUUACUUGACCUUUGCAUCUCUUUAUGCAUUGCUUUGUAGUGAGUUCUUGCCAAAGGAGAUUUGCCCGGUAAU
pyr-1687	UUGAGCCGUGCCAAUAUCAC	atr-MIR171b	-88.40	0.91	DangsuB	GGUAUGAAGUUGGUUUUCAUGGGAGGAAGGCGAAGGGGACUCGGUUCGCGUGCGGUGUUGGCACGGUUCAAUCUGACUGCUGCCCUGCUAGUUGUGCAGUAUGGUGGUGCGAUUGAGCCGUGCCAAUAUCACACUCAAUCAGCCAUCGAAUCAAGUCUUCUUCUUCCUCCUCCUCUUCCUCUUCUUAUU
pyr-1687	UUGAGCCGUGCCAAUAUCAC	gma-MIR171q	-47.90	1.11	DangsuB	UGAGAACUUGAGAUAUUGGUGCGGUUCAAUCAGAAGGCAGUGUUUUAUGAUCCAAAAACUCUGUGUUAUUUGAUUGAGCCGUGCCAAUAUCACAUGUAAUUCAUCUCGG
pyr-1687	UUGAGCCGUGCCAAUAUCAC	gma-MIR171c	-46.50	1.19	DangsuB	UUAAGAACUUGAGAUAUUGGUGCGGUUCAAUCAGAAGGCAGUGUUUUAUGAUCCAAAAGCUCUGUGUUAUUUGAUUGAGCCGUGCCAAUAUCACAUGUUAUUGA
pyr-1687	UUGAGCCGUGCCAAUAUCAC	gma-MIR171f	-43.40	1.21	DangsuB	GAGAUAUUGGUACGGUUCAAUCAGAAGGCAGUGCUUUAUGAUUUCAAAGCUCUCUUAUUUGAUUGAGCCGUGCCAAUAUCACAUGCAAAC
pyr-1687	UUGAGCCGUGCCAAUAUCAC	mdm-MIR171o	-38.90	1.34	DangsuB	UGGGAUGUUGGUAUGGUUCAAUCAAAUAAAAUCUCUCAAAAUUUGGGUCCUUUAAUUUGAUUGAGCCGUGCCAAUAUCACA
pyr-1687	UUGAGCCGUGCCAAUAUCAC	mdm-MIR171n	-38.90	1.34	DangsuB	UGGGAUGUUGGUAUGGUUCAAUCAAAUAAAAUCUCUCAAAAUUUGGGUCCUUUAAUUUGAUUGAGCCGUGCCAAUAUCACA
pyr-1687	UUGAGCCGUGCCAAUAUCAC	mdm-MIR171m	-40.80	1.27	DangsuB	UGGGAUGUUGGAAUGGCUCAAUCAAAUAAAAUCUCCCAAAGGAUUGGGUCUUUUAAUUUGAUUGAGCCGUGCCAAUAUCACA
pyr-1687	UUGAGCCGUGCCAAUAUCAC	gma-MIR171o	-48.20	1.24	DangsuB	UAAGGGCUUGAGAUAUUGGUACGGUUCAAUCAGAAGACAGUGCUUUAUGAUUCUAAAGCUCUCUUAUUUGAUUGAGCCGUGCCAAUAUCACAUGCAAACUUU
pyr-1687	UUGAGCCGUGCCAAUAUCAC	ptc-MIR171g	-43.10	1.03	DangsuB	GAAAGUGGGGGAUGUUGGGAUGGCUCAAUCAUGUCAAAUCUCCCAAAUUAUGAUGUUGGGUCUUUUAAUCUGAUUGAGCCGUGCCAAUAUCACACUUCUU
pyr-1687	UUGAGCCGUGCCAAUAUCAC	ptc-MIR171h	-44.70	1.04	DangsuB	GAAAGUGGGGGAUGUUGGGAUGGCUCAAUCAUAUCAAAUCUCCCAAACUAUGAUGUUGGGUCGUUUAAUCUGAUUGAGCCGUGCCAAUAUCACACUAACU
pyr-1687	UUGAGCCGUGCCAAUAUCAC	osa-MIR171f	-60.50	1.01	DangsuB	GGGAGAGUGCGAUGUUGGCAUGGUUCAAUCAAACCGGGCAAACUUAUGCACUAGCUAAGCAAGAUGCAGGGAUAUGCAGUAUGGUUUUGUUUGGUCUGAUUGAGCCGUGCCAAUAUCACAAGCUUGC
pyr-1687	UUGAGCCGUGCCAAUAUCAC	tcc-MIR171g	-50.60	1.01	DangsuB	GAUUUCUUAGUUGAAAAUUUGAUGUUGGCACGGUUCAAUCGGAUCAAAUCUCUCAGUGGCUGAGUCCUUUAGUCUGAUUGAGCCGUGCCAAUAUCACAUUCAGUCACUGCAUCGG
pyr-1687	UUGAGCCGUGCCAAUAUCAC	smo-MIR171b	-39.10	0.81	DangsuB	UGUGUCUGUGAUAUUGACAAGGCUCAAUCAGGCUGCAAUGCUACUCGAGCUAAUUAGUGAUGCUGCCAGCUUGAGCCGUGCCAAUAUCACAUAGAUAGCUAGC
pyr-1687	UUGAGCCGUGCCAAUAUCAC	zma-MIR171f	-70.50	0.88	DangsuB	UUGGUUGUUGGCUGAGAGAGUGCGAUGUUGGCAUGGCUCAAUCAACUCGCCGGCCGCGGGUGGCUUAUAGCUUAAUUCUGCGCAUUCGAUCGAGGUGCGGGCGCAGUGUUUAAUUGAUUGAGCCGUGCCAAUAUCACAACCUUCUCUAGCCUAUA
pyr-1687	UUGAGCCGUGCCAAUAUCAC	zma-MIR171i	-52.90	0.96	DangsuB	CUGGUUGGCUGAGAGAGUGCGAUGUUGGCACGGUUCAAUCAAAUCGCCGGCCGGGUUGACUUGUUGAUUGAGCCGUGCCAAUAUCACAACCUUCUCUAGCCUAG
pyr-1687	UUGAGCCGUGCCAAUAUCAC	sbi-MIR171a	-74.80	0.94	DangsuB	UUGGUUGGCUGAGAGAGUGCGAUGUUGGCAUGGUUCAAUCAAAUCAUCGCCCGGCAAGGUGACUUAAAUUUUGCGCUUUCGAUCGAUCGAGGUGCAGGGAGGUGUUUCCAGGCACCGUGUUUGAUUGAGCCGUGCCAAUAUCACAACCUUCUCUAGCCUAU
pyr-1687	UUGAGCCGUGCCAAUAUCAC	pde-MIR171	-53.80	1.25	DangsuB	GAAAGAAUGUGAUGUUGGCUAGGCUCAAUCGGAUUGUAACGCCCACGGAAUUUGGUCUUGUGAUCUGAUUGAGCCGUGCCAAUAUCACAUUCUAAC
pyr-1750	UCCUUGAGUGCAGCGUUGAUG	atr-MIR397a	-50.30	0.80	DangsuB	AACCAAUUUCAUGCUUGAGGAGGCCCAAUGGGGAGAAAAACCAUACACAUCCUUGAGUGCAGCGUUGAUGAACCCAAAACCCUAAUUUCAGCAGCGCUGUACUCAAUGAUGCCUUUGGUAUUUCAUGUAAUUUUUCUCUUAUUCCUUUUUUUGGUU
pyr-4851	CUGAAGUGUUUGGAGGAACUC	aly-MIR395i	-42.10	1.28	DangsuA	CUCAAGAGUUCCUCCGAACACUUCAUUGAAAAAAGGUUCUCCAUUUUCGUAAUUUUUUUUUACUGAAGUGUUUGGAGGAACUCCAGAUGAUAU
pyr-4851	CUGAAGUGUUUGGAGGAACUC	lus-MIR395e	-56.50	1.07	DangsuA	ACCAGGUGUCCCCUGGAGUUCCUCUGAACGCUUCACUGAGGCUCUGUUAUGGCAGAUGAGUUCACUGAAGUGUUUGGAGGAACUCUGGGUGUGGCUUGGU
pyr-4851	CUGAAGUGUUUGGAGGAACUC	cca-MIR395b	-46.90	1.20	DangsuA	AAGUGUCCCUAUGAGUUCCUUCGAGCACUUCAUUGGGAAGCUUUAUUUAGGAUUUCCUACUGAAGUGUUUGGAGGAACUCUAAGUGCCACUU
pyr-4851	CUGAAGUGUUUGGAGGAACUC	cca-MIR395c	-45.40	1.08	DangsuA	AAGUGUCCCUCAGAGAUCCUCCGAACACUUCAUUGGGAUGUUUUGUUUAGGAUUUCCUACUGAAGUGUUUGGAGGAACUCCAAGCGUCGCUU
pyr-4857	GGCAAGUUGUUCUUGGCUACA	osa-MIR169a	-98.60	1.01	DangsuB	CGCCGGCGGCCUGACAUUGGGAUCGGAGGCCAUGGUGCAGCCAAGGAUGACUUGCCGAUCGAUCGAUCUAUCUAUGAAGCUAAGCUAGCUGGCCAUGGAUCCAUCCAUCAAUUGGCAAGUUGUUCUUGGCUACAUCUUGGCCCCUGCUCCUCAUGUAAGGCCGGCCUGUGGCG
pyr-4580	CUGAAGUGUUUGGAGGAACUU	pab-MIR395	-44.30	0.84	DangsuA	CUCACAGCUGGUUCUCAAUGCCGGGAGUUCCUUCAAUCACUUCGCCGAAUCCGAAAGCAUUUCACUGAAGUGUUUGGAGGAACUUCGGGCGUCACUGAACUGC
pyr-4610	UGACAGAAGAGAAUGAGCAC	nta-MIR156f	-50.50	1.17	DangsuB	UUAAAGGAGGUGACAGAAGAGAAUGAGCACACAUGGUGUUUUCUUACAUGAGAUAUAUAUAUUCAUGCUUGAAACUAUGCGUGCUCACUCUCUAUCUGUCACCCACUUUCUUU
pyr-4034	UGUGUUCUCAGGUCACCCCU	aly-MIR398b	-52.40	0.82	DangsuB	GAUAUAUUUUGAAGGUAGUGGAUCUCGACAGGGUUGAUAUGAGGACACAUGUGUAAUCAACGGCUGUAAUGACGCCACGUCAUUGUUACAUGUGUUCUCAGGUCACCCCUGCUGAGCUCUUUCUCUACCGACCAUCUUUAUC
pyr-4034	UGUGUUCUCAGGUCACCCCU	stu-MIR398b	-38.00	1.03	DangsuB	GAGUGUGCCUUAGAACACAGGUGUAUUUUGGUCUACUCCUGUUUUGGACCCAAAAUAUGCUUGUGUUCUCAGGUCACCCCU
pyr-4034	UGUGUUCUCAGGUCACCCCU	lus-MIR398b	-68.60	0.93	DangsuB	UCAUGUCUCUGUGUUCUCAGGUCACCCCUCUGGGUCACCUUAUUUCUACAUUUCCAUCUCAAAUUCUAUUUUCUUAUAUUUAUUCGGGAGCGACGUUGAGACACAUACGUUCUCGAAAGAUAUCUAAACAAAUAUGGUUAGAUCCAGAGGGGUGCAACCUGAAAACACAGACGACGGA
pyr-4034	UGUGUUCUCAGGUCACCCCU	lus-MIR398c	-52.20	0.97	DangsuB	GGCAAGAGGGGUGCAACCUGAAAACACAGACGACGGAUUUUAGUCGCUUGGUUCGAGUUAACUAUACUUAUCUCGUCUCUGUGUUCUCAGGUCACCCCUCCAGGCC
pyr-4034	UGUGUUCUCAGGUCACCCCU	lus-MIR398d	-39.50	0.99	DangsuB	AAGGGGUGUAAUCUGAAAACACAGACGACGAGUAAUCAGUUGGAGUCUUGCUAUAUUUACUCAUGUCUCUGUGUUCUCAGGUCACCCCUC
pyr-4034	UGUGUUCUCAGGUCACCCCU	lus-MIR398e	-44.20	0.96	DangsuB	GAGGGGUGCAACCUGAAAACACAGACGACGGAUUUUGGUCGUUUGGUUCAAGUUAACUACACUUAUGUCGUCUCUGUGUUCUCAGGUCACCCCUC
pyr-4034	UGUGUUCUCAGGUCACCCCU	ath-MIR398c	-46.00	0.82	DangsuB	UGGAUCUCGACAGGGUUGAUAUGAGAACACACGAGCAAUCAACGGCUAUAACGACGCUACGUCAUUGUUACAGCUCUCGUUUCAUGUGUUCUCAGGUCACCCCUGCUGAGCUCUU
pyr-4034	UGUGUUCUCAGGUCACCCCU	ath-MIR398b	-51.50	0.94	DangsuB	UGGAUCUCGACAGGGUUGAUAUGAGAACACACGAGUAAUCAACGGCUGUAAUGACGCUACGUCAUUGUUACAGCUCUCGUUUUCAUGUGUUCUCAGGUCACCCCUGCUGAGCUCUU
pyr-4034	UGUGUUCUCAGGUCACCCCU	bra-MIR398	-46.80	0.81	DangsuB	GUGGACCUCGACAGGGUCGACAUGAGAACACAUGGUAAUCAAAGACUGUAAUGACGCCACGUCAUUGUAACAUACAUCACUCUUUUCAUGUGUUCUCAGGUCACCCCUGCUGAGCUCUUUCUCU
pyr-4034	UGUGUUCUCAGGUCACCCCU	hbr-MIR398	-44.80	0.64	DangsuB	GUGGAGAAUUCCUACAGGAGCGACCUGAGAUCACAUGUGGCCACCCUCACAUAUUCCCUUAUCUUCUAUUGGUUGUGUUUUCGUGUGUUCUCAGGUCACCCCUGCCGGGCUUUCCUCCCCUGCUAGAUUGGUAUGAUGAU
pyr-4034	UGUGUUCUCAGGUCACCCCU	ssl-MIR398	-37.20	1.09	DangsuB	GAAGAGUGAUGCUGAGAACACAUGUGGAUUACUGGAUGCAUUAGUCCACUUGUGUUCUCAGGUCACCCCUC
pyr-3687	AGAAUCCUGAUGAUGCUGCAU	tcc-MIR172d	-49.00	1.00	DangsuA	GGAGCAGUCGUUGUUUGCAAAUGUGGCAUCAUCAAGAUUCACAUGCAACGUACAUAUAUAUUUAUAUAUAUUAUAUGGUUUUGGCCUGAGAAUCCUGAUGAUGCUGCAUUGGCAAUGAAUGGCUAGAUG
pyr-3680	AGAAUCCUGAUGAUGCUGCAC	sbi-MIR172f	-59.10	0.95	DangsuB	GCGGCAUCAUCAGGAUUCACACCGGGUAAACACCGUUGGGUGGGUGCAGUUACCCAUGCACAUAUAUGCAGGUCUGGCUCUAUCUGUUGCUUGCGUGAGAAUCCUGAUGAUGCUGCAC
pyr-4850	UCUGUCGAAGGUGAGAUGGUGC	mdm-MIR5225b	-61.00	0.87	DangsuB	AUCAAAGCGUAGGGACUUCUGUCGAAGGUGAGAUGGUGCCGAAGGCCAUGUAUAUUGGUAGCUGCGAUUACAAGCUUUAUAUAGCUAGUCAAUUCAGGCCAGCGAGCUUCAUCCCUCCUCGACUGAAGCCUCUCACGCUUUGAU
pyr-4850	UCUGUCGAAGGUGAGAUGGUGC	mdm-MIR5225a	-61.00	0.87	DangsuB	AUCAAAGCGUAGGGACUUCUGUCGAAGGUGAGAUGGUGCCGAAGGCCAUGUAUAUUGGUAGCUGCGAUUACAAGCUUUAUAUAGCUAGUCAAUUCAGGCCAGCGAGCUUCAUCCCUCCUCGACUGAAGCCUCUCACGCUUUGAU
pyr-2220	UCGGACCAGGCUCCAUUCCUU	ptc-MIR166p	-51.40	0.76	DangsuA	UAAGGUUGAGAGGAACGCUGUCUGGGUCGAGGUCAUGGAGGCCAUGAUUAUACAUAAAUGGCAUUAUCUGAUGACAGCCCAGAUAAUCGAUGCACCUGUCUUGAACCUAAAUGAUUCUCGGACCAGGCUCCAUUCCUUCCAACCAU
pyr-3531	CAGCCAAGAAUGACUUGCCGG	gma-MIR169l	-41.10	1.00	DangsuA	GAGUGAUUUGCAGCCAAGAAUGACUUGCCGGAAUGCAUAUAUAUGCAUUAGGUACCAACAUAUAUAGUUGUAUUGUAUAAUUUCGGGCAAGUUGUUUUUGGCUACAUUUAUCUC
pyr-3531	CAGCCAAGAAUGACUUGCCGG	gma-MIR169k	-42.00	1.08	DangsuA	GAGUGAUUUGCAGCCAAGAAUGACUUGCCGGAAUGCUUGCAUUAGGCAUAAUAUAUAGUUGUAUACUUUAUAAUCCGGCAAGUUGUUUUUGGCUACACUUUUUUC
pyr-3531	CAGCCAAGAAUGACUUGCCGG	mes-MIR169m	-47.70	1.04	DangsuA	GAAUGCAGCCAAGAAUGACUUGCCGGAGUUUUCGUGCUUGAGCUCCGGUUGGUGUAAAGAACUUCAUCCGGCAGGUUGUUCUUGGCUACAUUC
pyr-3531	CAGCCAAGAAUGACUUGCCGG	mes-MIR169l	-42.20	1.03	DangsuA	CAGCCAAGAAUGACUUGCCGGAGUUUUCUUGAUAGAGCUCCGGUUGGUGUAAAGAACUUCGUCCGGCAGGUUGUUCUUGGCUA
pyr-602	UGACAAGGAGAGAGAGCACGC	mdm-MIR535c	-55.10	1.41	DangsuA	UGUGACAAGGAGAGAGAGCACGCUUGUCAUCACCCAUGAACGGAUCAUGGUUGUUUACAGGUGUGCUCUCUCUUCUUGUCAUA
pyr-602	UGACAAGGAGAGAGAGCACGC	mdm-MIR535b	-61.10	1.27	DangsuA	GAUGUUGUGUGACAAGGAGAGAGAGCACGCUUGUCAUCACCCAUGAACGGAUCAUGGUUGUUUACGGGCGUGCUCUCUCUUCUUGUCAUACGGUC
pyr-229	AGCUCUGAUACCAUGUUAGAUU	pab-MIR1863	-34.20	0.60	DangsuA	UCUUGCCAUGACAGAGAUUAUCUCCUGAUCUGCAAAACAAAUACCUAGUGUAGGAUCUACGUGGGCUCAAGGCUUCUUCUUGAGCUUCUUCACGUCCAUAGCUCUGAUACCAUGUUAGAUUUUAGGGUAAAAAUGAAAACAAUA
pyr-968	GCUCACUCUCUAUCUGUCAGC	osa-MIR156b	-93.10	1.07	DangsuA	UUGUCUUGAGAGGGGAAGAGAUCUCUAUGGGUUUUGGAGGUCUGACAGAAGAGAGUGAGCACACACGGUGCUUUCUUAGCAUGCAAGAGCCAUGCUGGGAGCUGUGCGUGCUCACUCUCUAUCUGUCAGCCGUUCACCAUGCCCAAUAUGAUUAAUCUCCUUCUCUCAGUUGACAG
pyr-1034	UUGAAGCGUUUGGGGGAACUC	mtr-MIR395k	-29.70	1.02	DangsuB	GAGUUCCCUUAAACAUUUCAUUAAGGACUCAAUUUCUUCUCUUCAACCUUGUUGAAGCGUUUGGGGGAACUC
pyr-4628	AUUGGAGUGAAGGGAGCU	ptc-MIR159c	-94.50	0.88	DangsuB	GAGGCUCAAUGGAGCUCUCCCCACUCCAUGCCUGAAAGGAGUUCGAUGGUAGACCAUGGCUGCUAGUUCAUGAAUACCCUUGGGUGCGCAGAAUUAGCAACGGUGCAGGCGAAGUUGCGCAGGCUAAGGGUCUGCAUGACCUAGGAGACGUGGUUACCCUGACCCUUUUUGUAUUGGAGUGAAGGGAGCUCGAUGGUCUUU
pyr-4628	AUUGGAGUGAAGGGAGCU	mes-MIR159d	-95.00	0.91	DangsuB	UAAUGGAGAUCUCUUCACUCCUAUGUAAAGGAGGCAAUGGUAGGCCAUGGCUGCUAGUUCAUGAAUACCCCUGGGUGCGCACUGUGCAGGAUAAGCAGAUAUCGAUUGAUCAUGAUUAUUAUGGGAUUGGCUUGGGUGCGCAGGCUAAGGGUUUGCAUGACCUGGGAGACGUGGUUGCCUUGGCAUUUUUUAUAUUGGAGUGAAGGGAGCUCUGUUG
pyr-4628	AUUGGAGUGAAGGGAGCU	mes-MIR159c	-95.70	0.90	DangsuB	GGGUUUUUGGUGAGGUUUAAUGGAGCUCUCUUCCCUCCUACUGUAAAGGAGGCGAAGGUAGGUAGGCCAUGGCUGCCAGUUCAUGAAUACCCCUGGGUGUGCAGGAUAAGCAGAGAGAGUGCGCAGGCUAAGGGUUUGCAUGACCUGGGAGACGUGGUUAUCUUGGCCAUUUUUAUAUUGGAGUGAAGGGAGCUCUGUUGUCUUUCUAACAAUCU
pyr-4628	AUUGGAGUGAAGGGAGCU	lus-MIR159a	-85.00	0.99	DangsuB	GAGCUCUCUUCACUCCAUUUCUGAAAGGAGGUGAUAGGUAUGCCAUGGCUAGCAGGUUCAUGAUUACCCCUAGCCAUUAGUCGAGUUUGAAGAGCGUAGGCUACGGGUUCGCAUGAGUCUGGGAGGCAUGGCUACUCUGAUCUUUUUGGCAUUGGAGUGAAGGGAGCUCGA
pyr-518	UCUUCCCUAUGCCUCCCAUUCC	csi-MIR482a	-55.40	1.18	DangsuB	AGGAAGUUUUGGGAGUGGGAGCGUGGGGUAAGAAGAGAAGAAAGCGUAUAAUUUUUCUUUUCUUUUUCAAUUGAGAAAGAAAAUUACAAAUUCAAUUUCUUCCCUAUGCCUCCCAUUCCUAUGAUUUCC
pyr-2416	UCAACAUGGUAUCAGAGCUGGAAG	osa-MIR1873	-75.20	0.96	DangsuB	UAGAUUAUGAACCUCAACAUGGUAUCAGAGCUGGAAGUCCUAAAGUUGACAUCAUGAUAGCCUGACGAUGGUGGAGACCAUGAUAAGCUGAUACCAUGUAUUUUGCCGACAUUGUGUUUCUCCAAGAUUGUGCUACAUCACAAACUUAGAAAAACUUAGAACUUCUAGCUCUGAUACCAUGUUGAGUUUUAUGGCCU
pyr-3417	CAGCCAAGGAUGAUUUGCCGG	ghr-MIR169b	-61.20	0.82	DangsuA	UAAAGUAGUGCAGCCAAGGAUGAUUUGCCGGCUAGGCUUUCUCUUCCACUUAUCUGAGUUGUUUUUUGAUACUCGUUAAUUACUCAAAACUAUUUAUGUUAAUGGUUUGAACUGUUCAUGGGAACGGGAAGUUAAUUAUUUAAUACAUAAAUGAAUCAAACCUUUGUUGGAGGAGAUAAUCGGCAAGUUGUCUUUGGCUACGUUUCUUUC
pyr-3894	UGCACAGCCUCUUCCCUGGUU	stu-MIR408a	-35.30	0.95	DangsuA	ACAGGGACGAGGCAGCGCAUGAGAUGUACAAUUUUACUAGUUGCCCAUUCCAUGCACAGCCUCUUCCCUGGUU
pyr-161	GCUCUCUAGCCUUCUGUCAUCA	aly-MIR157a	-54.10	1.08	DangsuA	GAGGCAUUGAGAGUGUUGACAGAAGAUAGAGAGCACAGAUGAUAAGAUACAAUUCGGAGCAGUUUCUUUGCAUCUUACUCCUUUGUGCUCUCUAGCCUUCUGUCAUCACCUUUUAUUUGCUUU
pyr-161	GCUCUCUAGCCUUCUGUCAUCA	ath-MIR157b	-55.40	0.94	DangsuA	UGGGAGGCAUUGAUAGUGUUGACAGAAGAUAGAGAGCACAGAUGAUAAGAUACAAUUCCUCGCAGCUUCUUUGCAUCUUACUCCUUUGUGCUCUCUAGCCUUCUGUCAUCACCCGUUAUUUGCCAUCACCCA
pyr-161	GCUCUCUAGCCUUCUGUCAUCA	atr-MIR156a	-80.40	1.01	DangsuA	AGGGUUUAUAUGUGAGGGAGUAAGUAAUAGAGAGAGGGGGUCUGGUGUUGUUGACAGAAGAUAGAGAGCACAUAAAGUAACGUGCAGUGGGCGUUUGCAUUUUAUUUUGUAUGUGCUCUCUAGCCUUCUGUCAUCACCUGCUCACCAUUCCCACCCAUCUUACUUCUCCAACAUAUUUCUAAUCCU
pyr-161	GCUCUCUAGCCUUCUGUCAUCA	ath-MIR157a	-46.00	1.07	DangsuA	GUGUUGACAGAAGAUAGAGAGCACAGAUGAUGAGAUACAAUUCGGAGCAUGUUCUUUGCAUCUUACUCCUUUGUGCUCUCUAGCCUUCUGUCAUCACC
pyr-3094	GUUCAAGAAAGCUGUGGGAAA	cca-MIR396a	-55.10	1.38	DangsuA	AUGUUUUUCCACAGCUUUCUUGAACUUUAAAAAUUCAUGUGUUAAUUCCGUUCUCAAGAAUUCCUUUUCGAGAAUUCACGUGAUUAAACGAAGUUCAAGAAAGCUGUGGGAAAACAUGA
pyr-3094	GUUCAAGAAAGCUGUGGGAAA	smo-MIR396	-63.30	0.78	DangsuA	UCUCAUGCUUUUCCACGGCUUUCUUGAACCUGGUGCUCUUCCAAGGCAGGAGGAUCAGAAAACGUUGUGGUAUUUCUCAUCUCCUCGUCUCGUCCUUGGUCUCCCCUUGAAAGAAACUCACCAGUAAGAGUACGAAGUUCAAGAAAGCUGUGGGAAACAAUGGCCGGA
pyr-3094	GUUCAAGAAAGCUGUGGGAAA	cca-MIR396c	-57.90	1.32	DangsuA	GCCAUGUUUUUCCACAGCUUUCUUGAACUUUAAAAAUUCAUGUGUUAAUUCCGUUCUCAAGAAUUCCUUUUCGAGAAUUCACGUGAUUAAACGAAGUUCAAGAAAGCUGUGGGAAAACAUGACA
pyr-3094	GUUCAAGAAAGCUGUGGGAAA	vvi-MIR396b	-52.20	1.02	DangsuA	UCCUGCCAUGCUUUUCCACAGCUUUCUUGAACUUCUUCUCCCUGUUUGGUGGUCUCCUACGUUUACCCAUCCACUGAAGUUCAAGAAAGCUGUGGGAAACCAUGGCUU
pyr-3094	GUUCAAGAAAGCUGUGGGAAA	nta-MIR396c	-52.20	1.16	DangsuA	UAUCAUGCUUUUCCACAGCUUUCUUGAACUUCUUUCCCUCUGAAUUUUCAUCUCUAGCAAUUGAGUUAUUGAUAUGAGAUAAGAUUAAGCUCUGAAAGUUCAAGAAAGCUGUGGGAAAACAUGGUGAA
pyr-3327	GCGGCAUGGUAUUAGAGCAAGUUG	bdi-MIR7782	-58.40	1.12	DangsuB	UCAUCAAGUAUAUUACGCGGCAUGGUAUUAGAGCAAGUUGCCAAAUCUGGCUGCCAUGACAAUUGGUGAUGGUGAUGGUAUUGUUUUGGUGACCUGCUCUGAUACCAUGUUGUGAAAUAUUUUUAAUGCA
pyr-101	AUGAAGUGUUUGGGGGAACUU	mtr-MIR395h	-36.30	0.98	DangsuA	GACUUUCUCUGAACACUUCAUACAAGAGGUUAUCCAUCUAAUCUAAAAGUCAUUAGAUAUUUACGAUGGGUCGUUCUUCAAUGAAGUGUUUGGGGGAACUU
pyr-101	AUGAAGUGUUUGGGGGAACUU	gma-MIR395f	-46.70	0.88	DangsuA	GCUGUCUCUUGGAGUUCCUCUGAGCACUUCACGCGUGGGGCUAGUUCUAUUCAAUAUUACCAUUUAGAUAGAAUAGUCCUCAUCACUGAAAUGAAGUGUUUGGGGGAACUUUUGGGUACAAC
pyr-239	UAUAGGCAUUAUUUUUUUCUUC	gma-MIR9726	-11.60	0.73	DangsuB	GAUGAUGAAAGAAAAAAUAACUGAUUAGUCUUUCUAUUAUAAAAUAGAGUAUAGGCAUUAUUUUUUUCUUCUAAAA
pyr-561	UGACAGAAGAGAGCGAGCAC	sbi-MIR156e	-72.00	0.89	DangsuA	CGAUUAGGCCCUGAAGAGAUUGACAGAAGAGAGCGAGCACCCGGCGCGGCGGCCGGCAUGGAGCGCAUGCCGUCCCCGCCGCGUGCUCGCUUCUCUUUCUGUCAGCCUCUCUCUCGUCCUGGG
pyr-561	UGACAGAAGAGAGCGAGCAC	zma-MIR156k	-73.10	0.91	DangsuA	GGCUUAGGCCCCGAAGAGAUUGACAGAAGAGAGCGAGCACCUGGCGCGGCGACCGGCAUGGAACGCAUGCCGUCCCCGCCGCGUGCUCGCUUCUCUUUCUGUCAGCCUCUCCCUCGUCCUGAG
pyr-1338	UCAUUGAGUGCAGCGUUGACG	pab-MIR397	-60.40	1.14	DangsuB	AGCCGUGGCAACCACAUCAUUGAGUGCAGCGUUGACGAUAGAAAUUCCACCAAUAGAUUUGAUAAUAUCUAUCUAUUUGUGGAAUGCCAUUGAUAUUGUUAACCCUGCACUCAAUAGUAUGUUUGCCAAUGGCU
pyr-4833	UGACAGAAGAGAGGGAGCA	vvi-MIR156a	-47.10	1.00	DangsuB	AGAAAUAUGUUGACAGAAGAGAGGGAGCACAACCCAGCAUCAGCUAAAGACUCUUUGCUUUUCUUGGGAGUGUGCUCUCUCUUCUUCUGUCAUCAUCACACUCC
pyr-4833	UGACAGAAGAGAGGGAGCA	dpr-MIR156a	-42.70	0.95	DangsuB	AGGGAUUUGACAGAAGAGAGGGAGCACAGGCAGGGAAAUUGUAUAGAGAUUAGUGUUUUAUACGUUUAUGCGUGUGAUCCCUUCCCUUCUGUCAGCUAAUUCCA
pyr-986	CUGAAGUGUUUGGGGGGACUU	aly-MIR395c	-48.80	0.86	DangsuA	AUGACAGAGCUACAAGAAGAAAGUCAAAUGUCUUCAUGAGUUCCCUUUAACGCUUCAUUGUUAAUAUUCAAACUACAUUUAUUUCCAUAAAUGUUUGAUCGAUUUGUAUAUAACACUGAAGUGUUUGGGGGGACUUUUGGUGUCAUUCUGGCGUAGUUACGAUUAU
pyr-3548	GCAGCACCAUCAAGAUUCAC	bol-MIR172a	-43.40	1.01	DangsuA	CGUUUUUUGUAGGCGCAGCACCAUCAAGAUUCACAUGGAAAUUGAAAAAUCUCCUAAUUUUUAAUUAGGGUUUUGAUAUGUAUAUGAGAAUCUUGAUGAUGCUGCAUCAACAACCGACG
pyr-3548	GCAGCACCAUCAAGAUUCAC	stu-MIR172b	-30.10	0.97	DangsuA	GCAGCACCAUCAAGAUUCACAUAGAAAAUAUGGACUAUGAAAUGAAAUAUGCCCAAUUUUUGAAUACAUGAGAAUCUUGAUGAUGCUGCAU
pyr-3548	GCAGCACCAUCAAGAUUCAC	aly-MIR172b	-51.60	0.96	DangsuA	UAGCUCAUCUGUCGUUGUUUGUAGGUGCAGCACCAUCAAGAUUCACAUGAAAAUUGAUAAAUCUCCUAAAUUAGGGUUUUGAUAUGUAUAUGAGAAUCUUGAUGAUGCUGCAUCAACAAUCGACGGCUACAAAAUACCUAAAGCUG
pyr-3548	GCAGCACCAUCAAGAUUCAC	bna-MIR172a	-40.20	1.09	DangsuA	UUUUGUAGGCGCAGCACCAUCAAGAUUCACAUGGAAAUUGAAAAAUCUCCUAAUUUUUAAUUAGGGUUUUGAUAUGUAUAUGAGAAUCUUGAUGAUGCUGCAUCAACAAC
pyr-3548	GCAGCACCAUCAAGAUUCAC	sbi-MIR172c	-49.30	0.95	DangsuA	GUGCAGCACCAUCAAGAUUCACAUGGUCCAACUCAUGCAUCUUCAGUGAUGCUCAUGUGAUGGCUCGCAGUUGCUAUAUAUGCAUAUGUGAUGAGAUGAGAAUCUUGAUGAUGCUGCAU
pyr-3548	GCAGCACCAUCAAGAUUCAC	zma-MIR172d	-34.00	0.97	DangsuA	GUGCAGCACCAUCAAGAUUCACAUCCCCAGCUCGAUCUGUGCAUGAUGAGAUGAGAAUCUUGAUGAUGCUGCAU
pyr-3548	GCAGCACCAUCAAGAUUCAC	bra-MIR172a	-43.40	1.01	DangsuA	CGUUUUUUGUAGGCGCAGCACCAUCAAGAUUCACAUGGAAAUUGAAAAAUCUCCUAAUUUUUAAUUAGGGUUUUGAUAUGUAUAUGAGAAUCUUGAUGAUGCUGCAUCAACAACCGACG
pyr-3548	GCAGCACCAUCAAGAUUCAC	osa-MIR172d	-55.30	0.91	DangsuA	AAACAGUCGGUGCUUGCAGGUGCAGCACCAUCAAGAUUCACAUCGAGUUCAUCCCUAAACGAGAUCGAGGUUGGCUGACUAUAUGUGAUGAGAAUCUUGAUGAUGCUGCAUCAGCAAACGCUCGACUACU
pyr-3548	GCAGCACCAUCAAGAUUCAC	zma-MIR172b	-53.50	1.03	DangsuA	GUGCAGCACCAUCAAGAUUCACAUCGUCCAACUCAUGCAUCAUGCAUAUAUGCAUCUUCAAUGAUGCGUGCCUCGCAUGUGUGUGUAUAUAUAUAUGAUGAGAUGAGAAUCUUGAUGAUGCUGCAU
pyr-3548	GCAGCACCAUCAAGAUUCAC	gma-MIR172g	-45.60	1.01	DangsuA	GCAGGUGCAGCACCAUCAAGAUUCACAUGCAAUUUACACCCUAUAAGAGAUUUUUGACAAAAUUUCUUUCCUAGGAGAGUUUUGACUUGAGAAUCUUGAUGAUGCUGCAUCAGC
pyr-3548	GCAGCACCAUCAAGAUUCAC	lja-MIR172c	-47.30	1.18	DangsuA	AGUCGUUGUCUGCAGGUGCAGCACCAUCAAGAUUCACACACAAAUUAUAAGUGUUUUGGUGUUGAGAAUCUUGAUGAUGCUGCAUCAGCAAUAAACGAUU
pyr-3548	GCAGCACCAUCAAGAUUCAC	cme-MIR172d	-45.20	0.98	DangsuA	GUUGGUGCAGCACCAUCAAGAUUCACAAAGGCUUUAAUUAUUAUUUACGUUUAAAUUCUCUUUCCUUAAUUUUAUUCAAAUUUAAAAAAGAAAAGAAAGAAAAAAGAAAAAAGCCUUUUCCUUUGGGAAUCUUGAUGAUGCUGCAUCGUCAAAUAC
pyr-4011	CUGAAGUGUUUGGGGGGACCC	ppe-MIR395b	-49.70	0.96	DangsuA	AUCAGAUAGCCCCUAGAGUUCCCUCAAACACUUCAUUGGAGAUUAUUAUGGGCAUUAUCUUAAUUAUGCCUCUCUCUCUCUACUUUCUACUGAAGUGUUUGGGGGGACCCUUGGAGUCAUUUGAU
pyr-4011	CUGAAGUGUUUGGGGGGACCC	ppe-MIR395a	-50.30	1.01	DangsuA	GCAUCAGAUGGCCCCUAGAGUUCCCUCAAACACUUCAUUGGAGAUUAUAUGCCUCUCUCUACUUUCUACUGAAGUGUUUGGGGGGACCCUUGGAGUCAUUUGAUCC
pyr-3666	UUUCCUAUGCCCCCCAUUCCAC	gra-MIR482d	-44.82	0.80	DangsuB	ACUGGAAAUUUUUGGAAGUGGGGUGCGAGGAAAGAUCAUUUCUCUUCUCUCUUAUAUAUAUACACACACACACACACACACACAUACAAAGAGAUCAAACCAGAUCUUUCCUAUGCCCCCCAUUCCACUGAUUUCUAG
pyr-4491	UCAUCGUCCAAUCAGAAUGUGACA	gma-MIR1520o	-103.10	1.61	DangsuA	UUACAAAAGAAUAUUGAUUGUCAUGUGUCACAUUCUGAUUGGAUGAUAACUGUCAUGUGUUAGGUUUUGAUUUAAUAUUGACUCUAUGGACGAUGAAAAUGUAUUGUUGUUGUCAACGUUCAAUUAGAACGUGACAUGUGAUUGUCAUCGUCCAAUCAGAAUGUGACAUGUGACAGUCAACAUUCUUUUGUAA
pyr-3462	GCAGCGUCCUCAAGAUUCACA	csi-MIR172a	-62.00	0.90	DangsuB	GUCACCUUAAAACAGUCGUUGCUCGCUGUAGCAGCGUCCUCAAGAUUCACAUCCAGUCUAAAGGCAAAAGCAGCAAUUUUUCUUCAUUUUUGCUUGCCUUGGUUUUUGUCAGUGAGAAUCUUGAUGAUGCUGCAACGGCGAUUAAUGACUAGCUACCAACAA
pyr-2598	AUGGCUCUGAUAUCAUGUUGGUUU	osa-MIR1871	-60.10	1.37	DangsuB	UAACAAUGAAUAUAUCUGUUGUUUCUCUCAAAUCUAACAUGGUAUCGGAUCCAUAGGUGUAGCCAUAUCAAUCUUAAAGCUAUGGCUCUGAUAUCAUGUUGGUUUUGAAGGAAAUGACUGAUAUAUUUCAUUGUA
pyr-4229	UGAGCCAAAGAUGACUUGCCGG	mtr-MIR169i	-35.00	0.88	DangsuB	GAUUUGAGCCAAAGAUGACUUGCCGGCAUGCUGCCUGAAAAGCAAGAAGGGUGUUGUUUUGCUGGCAGUUGUCAUUGGUUCAUGUU
pyr-4229	UGAGCCAAAGAUGACUUGCCGG	mtr-MIR169h	-35.00	0.88	DangsuB	GAUUUGAGCCAAAGAUGACUUGCCGGCAUGCUGCCUGAAAAGCAAGAAGGGUGUUGUUUUGCUGGCAGUUGUCAUUGGUUCAUGUU
pyr-247	CAGCCAAGAAUGACUUGCCG	mes-MIR169m	-47.70	1.04	DangsuA	GAAUGCAGCCAAGAAUGACUUGCCGGAGUUUUCGUGCUUGAGCUCCGGUUGGUGUAAAGAACUUCAUCCGGCAGGUUGUUCUUGGCUACAUUC
pyr-247	CAGCCAAGAAUGACUUGCCG	mes-MIR169l	-42.20	1.03	DangsuA	CAGCCAAGAAUGACUUGCCGGAGUUUUCUUGAUAGAGCUCCGGUUGGUGUAAAGAACUUCGUCCGGCAGGUUGUUCUUGGCUA
pyr-247	CAGCCAAGAAUGACUUGCCG	gma-MIR169l	-41.10	1.00	DangsuA	GAGUGAUUUGCAGCCAAGAAUGACUUGCCGGAAUGCAUAUAUAUGCAUUAGGUACCAACAUAUAUAGUUGUAUUGUAUAAUUUCGGGCAAGUUGUUUUUGGCUACAUUUAUCUC
pyr-247	CAGCCAAGAAUGACUUGCCG	gma-MIR169k	-42.00	1.08	DangsuA	GAGUGAUUUGCAGCCAAGAAUGACUUGCCGGAAUGCUUGCAUUAGGCAUAAUAUAUAGUUGUAUACUUUAUAAUCCGGCAAGUUGUUUUUGGCUACACUUUUUUC
pyr-1499	AGGAAAAAAAAUCUGAUUUGUCAU	gra-MIR7504d	-30.40	1.09	DangsuA	CAAUAGGAGAAUGACAAAUCAUAUUUUUCUUUCUGAUCUUCAGCUUUUUCCUCUUCAAAAAUUUUAAAUUCAACAAAAAUUUUAAAAAUCAGGAAAAAAAAUCUGAUUUGUCAUUAUUCUAUUA
pyr-1659	UGGAGAGGCAGGGCACAUGCU	cme-MIR164b	-50.20	1.20	DangsuA	UGAGCCAUGCUGGAGAGGCAGGGCACAUGCUAGAUUUACCAGCAAGAUGGUAAGUUUUAGCAUGUGCUCUUCUUCUCCAACUUGGAUUC
pyr-3402	GGGAUGUUGUCUGGCUCGACA	sly-MIR166c	-72.40	1.06	DangsuA	UGUGUGUGGUGAGUUUGAGGGGGAUGUUGUCUGGCUCGACACAAUUACUCUAUUGUAUGUAUUUAGUUAUUCGUUAUCAAGAUUGAUGUCGAUAACGAAUAAAUUAAACACAUAUAUACAAGAUGUAAAAAGGGAGUAAAGGCGUCGGACCAGGCUUCAUUCCUCUCAAACAAUAUUCUACUUUUACA
pyr-4791	UGUGUUCUCAGGUCACCCCUG	bra-MIR398	-46.80	0.81	DangsuB	GUGGACCUCGACAGGGUCGACAUGAGAACACAUGGUAAUCAAAGACUGUAAUGACGCCACGUCAUUGUAACAUACAUCACUCUUUUCAUGUGUUCUCAGGUCACCCCUGCUGAGCUCUUUCUCU
pyr-4791	UGUGUUCUCAGGUCACCCCUG	hbr-MIR398	-44.80	0.64	DangsuB	GUGGAGAAUUCCUACAGGAGCGACCUGAGAUCACAUGUGGCCACCCUCACAUAUUCCCUUAUCUUCUAUUGGUUGUGUUUUCGUGUGUUCUCAGGUCACCCCUGCCGGGCUUUCCUCCCCUGCUAGAUUGGUAUGAUGAU
pyr-4791	UGUGUUCUCAGGUCACCCCUG	ath-MIR398c	-46.00	0.82	DangsuB	UGGAUCUCGACAGGGUUGAUAUGAGAACACACGAGCAAUCAACGGCUAUAACGACGCUACGUCAUUGUUACAGCUCUCGUUUCAUGUGUUCUCAGGUCACCCCUGCUGAGCUCUU
pyr-4791	UGUGUUCUCAGGUCACCCCUG	aly-MIR398b	-52.40	0.82	DangsuB	GAUAUAUUUUGAAGGUAGUGGAUCUCGACAGGGUUGAUAUGAGGACACAUGUGUAAUCAACGGCUGUAAUGACGCCACGUCAUUGUUACAUGUGUUCUCAGGUCACCCCUGCUGAGCUCUUUCUCUACCGACCAUCUUUAUC
pyr-4791	UGUGUUCUCAGGUCACCCCUG	ath-MIR398b	-51.50	0.94	DangsuB	UGGAUCUCGACAGGGUUGAUAUGAGAACACACGAGUAAUCAACGGCUGUAAUGACGCUACGUCAUUGUUACAGCUCUCGUUUUCAUGUGUUCUCAGGUCACCCCUGCUGAGCUCUU
pyr-1277	GAGGUGUUUGGGAUGAGAGAA	gma-MIR1507c	-35.00	1.06	DangsuB	UGCUAGAGGUGUUUGGGAUGAGAGAAUAGAAUUUUUUCAAAUGCUUGAAAGUGAUCUCUUCCCUCAUUCCAAACAUCAUCUAACACACAU
pyr-532	UGACAGAAGAGAGGGAGCAC	vvi-MIR156a	-47.10	1.00	DangsuB	AGAAAUAUGUUGACAGAAGAGAGGGAGCACAACCCAGCAUCAGCUAAAGACUCUUUGCUUUUCUUGGGAGUGUGCUCUCUCUUCUUCUGUCAUCAUCACACUCC
pyr-532	UGACAGAAGAGAGGGAGCAC	dpr-MIR156a	-42.70	0.95	DangsuB	AGGGAUUUGACAGAAGAGAGGGAGCACAGGCAGGGAAAUUGUAUAGAGAUUAGUGUUUUAUACGUUUAUGCGUGUGAUCCCUUCCCUUCUGUCAGCUAAUUCCA
pyr-3658	UCUGUCGUAGGAGAGAUGGCGC	ppe-MIR5225	-70.10	1.10	DangsuB	AUCAAAUUCGUAGGGGCUUCUGUCGUAGGAGAGAUGGCGCCAAAUGCAAUCAUAUUGGUUUGGUACUAAUUAUGGUAGAAUUAAAGCUAAGCCAAUUUGGGCACCGGGUUUCAUCUCUCCUCGACUGAAGCCCCUCACUUUGAU
pyr-3573	UGCCAAAGGAGAGCUGCCCUA	mtr-MIR399d	-49.50	0.99	DangsuA	UAAAGUAAGCAAAUCAGUCAUAGGGCAUGUCUCUAUUGGCAGGUGAUAUGGUGAUAUUUCAUUUGACUUUAAGGCUCUAAAAAUUCACUUGCCAAAGGAGAGCUGCCCUACGAGUGUUUAGCUUAAACA
pyr-3573	UGCCAAAGGAGAGCUGCCCUA	mtr-MIR399m	-44.90	1.21	DangsuA	AGUCAUAGGGCAUGUCUCUAUUGGCAGGUGAUAUAGUGAUAUGGCUCUAGAAAUUCACUUGCCAAAGGAGAGCUGCCCUAUGAAU
pyr-3573	UGCCAAAGGAGAGCUGCCCUA	mtr-MIR399n	-40.20	0.93	DangsuA	AGUCAUAGGGCAUGUCUCUAUUGGCAGGUGAUAUGGUGAUAUUUCAUUUGACUUUAAGGCUCUAGAAAUUCACUUGCCAAAGGAGAGCUGCCCUACGAGU
pyr-2433	CACGUGCUCCCCUCCUCCAAC	bra-MIR164e	-52.10	0.95	DangsuA	GUAGGUGAGAACCUCCAUGUUGGAGAAGCAGGGCACGUGCAAACCAAAAAACAUGAAAUCUGUUUCAUAUGCUUUGCACGUGCUCCCCUCCUCCAACAUGAGCUCCUCACCAUU
pyr-2433	CACGUGCUCCCCUCCUCCAAC	ptc-MIR164d	-46.90	0.85	DangsuA	UGGCUCACGCUGGAGAAGCAGGGCACGUGCAAAAUCCUUCUCGGCUUCCAGAUGCUGAUGAAGCACUCUUUGCACGUGCUCCCCUCCUCCAACAUGAGU
pyr-2322	UUGUAGAGAAAGAGAAGAGAGCAC	csi-MIR3946	-23.50	0.52	DangsuB	AUAAAGAUGAUGAUGACAAUGAAUUUUGUAGAGAAAGAGAAGAGAGCACAAACUUUUUGCUGAAAGUAGCUUUGAUUCGAUGUGUAUCGGUUCAUAGAUAAUGAGUUUUCAAGUCUAUUUUAAUAGAAUACUAAAAGUUAGCUCUAAAAAUC
pyr-4200	GUCCUCGGGAUGCGGAUUACC	bna-MIR2111a	-66.20	1.03	DangsuB	GAUGACAAGUAUUGGUGAGGACCGGGUAAUCUGCAUCCUGAGGUUUAAAGCUUGAUUAUACGCAUAACAUGCCGACGCAUAUAACUAUGUGUUUUAGAAUAGCUUUUAGUCCUCGGGAUGCGGAUUACCUCUUCCUUACUAUACGUACACG
pyr-4200	GUCCUCGGGAUGCGGAUUACC	aly-MIR2111c	-64.50	1.17	DangsuB	GUAUUGGUGAGGAUCGGGUAAUCUGCAUCCUGAGGUUUAAAGCUUAAUUUAAGCAGAAAAUUUGUAUACGCAUAUACGUAUGUGUGUUGGUAUAGCUUUUAGUCCUCGGGAUGCGGAUUACCUCUUCCUUACUUACAAUAC
pyr-4200	GUCCUCGGGAUGCGGAUUACC	aly-MIR2111a	-64.50	1.17	DangsuB	GUAUUGGUGAGGAUCGGGUAAUCUGCAUCCUGAGGUUUAAAGCUUAAUUUAAGCAGAAAAUUUGUAUACGCAUAUACGUAUGUGUGUUGGUAUAGCUUUUAGUCCUCGGGAUGCGGAUUACCUCUUCCUUACUUACAAUAC
pyr-4200	GUCCUCGGGAUGCGGAUUACC	ath-MIR2111a	-65.40	1.01	DangsuB	CGAUGAUGAGUAUUGGUGAGGACCGGGUAAUCUGCAUCCUGAGGUUUAAAGCUUAAUUUACGCAGGAAAUUUGUAUACGCAUAUACGUAUGUGUAUUAGUAUACCUUUUAGUCCUCGGGAUGCGGAUUACCUCGUUCUUACUUACAAUACACGUACUCG
pyr-4200	GUCCUCGGGAUGCGGAUUACC	bra-MIR2111a	-68.00	1.00	DangsuB	CAGAUGACAAGUAUUGGUGAGGACCGGGUAAUCUGCAUCCUGAGGUUUAAAGCUUGAUUAUACGCAUAACAUGCCGACGCAUAUAACUAUGUGUUUUAGAAUAGCUUUUAGUCCUCGGGAUGCGGAUUACCUCUUCCUUACUAUACGUACACGGUUACAUG
pyr-4671	UAGAGAGGUGGUACAAUUGUG	ppe-MIR6267a	-68.80	1.72	DangsuB	AUUUUUCAUACCAUAAUUGUACCAUCUCUCUAAUAGAGGUGGGCCCCGUUGUAUUGAUGGGCUCCACCUUUAUUAGAGAGGUGGUACAAUUGUGAUAUGAAAAA
pyr-2690	UUAGAUUCACGCACAAACUUG	gma-MIR403a	-35.00	0.95	DangsuB	AAAUUGCAGGUUCGUGCGUGAAUCUAACGAAAGUUUCUCGUUCUCUCCAUUCCACUUCUGCGUUAGAUUCACGCACAAACUUGUCAUUU
pyr-2690	UUAGAUUCACGCACAAACUUG	gma-MIR403b	-43.50	1.06	DangsuB	GAGACAGAGGCAAAUCGCAGGUUCGUGCGUGAAUCUAAUCAAAGUUUCUCAUUAACUUCUGCGUUAGAUUCACGCACAAACUUGUCAUUUCCCUUUUCUU
pyr-818	UCAUUGAGCGCAGCGUUGAUG	zma-MIR397a	-39.30	0.60	DangsuB	GUCAUUGAGCGCAGCGUUGAUGAUGCGGAGCAUGUACGUCUUCCCGGGCUUCACUUUCAGCUUGAACGUGUCUGCGUGCAUGCAUAUCAUAAGUAUGGAUAUGAGUUAGUAUAAAGAAUCAUAGCCGUUAGCGCUCAUUAACU
pyr-818	UCAUUGAGCGCAGCGUUGAUG	zma-MIR397b	-50.40	0.92	DangsuB	AUCAUUGAGCGCAGCGUUGAUGAGCCAGCCGCCGUGCCUCCCCUGUCGGCUGCGGCGGCUCACCAGCGCUGCACUCAAUUACGC
pyr-252	CGACAGAAGAGAGUGAGCAUA	osa-MIR156l	-58.90	0.95	DangsuB	GCUAGGGAGCCGACAGAAGAGAGUGAGCAUAUAUAGUUCUUUCCUUGCAUAUGUGGUCAUAUGUGUGUUGACUGAAGAGAUACAUAUAUAUAGAGAGAGAGAGUUCAUGUGCUUGAAGCUAUAUGUGCUCACUUCUCUUUCUGUCAGCAAAUUAUC
pyr-257	UGAUUGAGCCGUGCCAAUAUU	mtr-MIR171c	-36.50	1.14	DangsuB	AUUGAGAUAUUGGCUUGGUUCACUCAGAAGAAACAAAAAAUAACACUACUUGUGAAUGUUUUGAUUUUGAUUUUGAUUUUGAUUGAGCCGUGCCAAUAUUUCAAA
pyr-2056	UGCCAAAGGAGAUUUGCUCGU	vvi-MIR399d	-47.00	1.07	DangsuB	GUAAAUUAUAGAGCAGAUUUCUUUUGGCAGAUGGCGAUCACAAGCCAAUGUGCUCAAAGGGCAUUGAGUGUGUCUGCCAAAGGAGAUUUGCUCGUGAAUUUAACU
pyr-89	AUGAAGUGUUUGGGGGAACUC	mtr-MIR395a	-52.30	1.07	DangsuA	UUUUUGUUGAUUGUUUCUUAGAGUUCCUUUGAACGCUUCAUGCAUGAGAAUAUGUAUUUGGUCUAAUAUCCAUUAGAAAAGAUAGUUCUUCAUCAAUGAAGUGUUUGGGGGAACUCUUGGGUUCAACCAGCACCA
pyr-89	AUGAAGUGUUUGGGGGAACUC	mtr-MIR395c	-42.50	1.21	DangsuA	GAGUUCCUUUGAACGCUUCAUGCAUGAGAAUAUCUAUUUGGUCUAAUAUCCAUUAGAAAAGAUAGUCUUUUCUUCUAUGAAGUGUUUGGGGGAACUC
pyr-89	AUGAAGUGUUUGGGGGAACUC	mtr-MIR395d	-40.20	1.22	DangsuA	GAGUUCCUUUGAACGCUUCAUGCAUGAGAAUAUCUAUUUGGUCUAAAAUCCAUUAGAAAAAUAGUUCUUCUUAAAUGAAGUGUUUGGGGGAACUC
pyr-89	AUGAAGUGUUUGGGGGAACUC	mtr-MIR395e	-46.10	1.32	DangsuA	GAGUUCCUUUGAACGCUUCAUGCAUGAGAAUAUCUAUCUAUUUGGUUUAAAAUCCAUUAGGAUAGAUAGUUCUUCUUAAAUGAAGUGUUUGGGGGAACUC
pyr-89	AUGAAGUGUUUGGGGGAACUC	mtr-MIR395f	-37.50	1.10	DangsuA	GAGUUCCUUUGAACGCUUCAUGCAUGAGAAAUAUCUCUUUGGUUUAAAAUCCAUUAGAAAAGAUAGUAUUUUCUUCUAUGAAGUGUUUGGGGGAACUC
pyr-89	AUGAAGUGUUUGGGGGAACUC	mtr-MIR395i	-30.00	1.03	DangsuA	GAGUUCCUCUGAAUGCUUCAAUCAUGAGACAAUCUAUAUGAAUAGUUCUUGUUCAAUGAAGUGUUUGGGGGAACUC
pyr-89	AUGAAGUGUUUGGGGGAACUC	mtr-MIR395j	-33.00	1.10	DangsuA	GAGUUCCUCUGAAUGCUUCAAACAUGAGACAAUCUAUAUGGAUAGUUCUUGUUCAAUGAAGUGUUUGGGGGAACUC
pyr-89	AUGAAGUGUUUGGGGGAACUC	mtr-MIR395l	-39.10	1.06	DangsuA	GAGUUCCUUUGAACGCUUCAUGCAUGAGAAUAUCUAUCUAUUUGGUCUAAAGUCCAUUAGAAAAGAUAGCCAUUUUUUCAAUGAAGUGUUUGGGGGAACUC
pyr-89	AUGAAGUGUUUGGGGGAACUC	mtr-MIR395m	-41.10	1.17	DangsuA	GAGUUCCUUUGAACGCUUCAUGCAUGAGAAUAUCUAUCUAUUUGGUCUAAAAUCCAUUAGAAAAGAUAGUUCUUCUUAAAUGAAGUGUUUGGGGGAACUC
pyr-89	AUGAAGUGUUUGGGGGAACUC	mtr-MIR395n	-39.10	1.06	DangsuA	GAGUUCCUUUGAACGCUUCAUGCAUGAGAAUAUCUAUCUAUUUGGUCUAAAGUCCAUUAGAAAAGAUAGCCAUUUUUUCAAUGAAGUGUUUGGGGGAACUC
pyr-89	AUGAAGUGUUUGGGGGAACUC	mtr-MIR395o	-32.40	0.95	DangsuA	GAGUUCCUCUGAACUCUUCAUCUAAAGGGCUAUAGCAAGAAAGAAAGGAAAAUCCUUGUAUGAUGAAGUGUUUGGGGGAACUC
pyr-89	AUGAAGUGUUUGGGGGAACUC	sbi-MIR395f	-59.40	1.24	DangsuA	ACAAUGUUUGGUGUUACCACGAGUUCCCUUCAAGCACUUCAUGAGGCACCAUUAAAUAACUCUAUUUAAGAUUAGGUGUAAUAUGAAGUGUUUGGGGGAACUCUUGGUGAUACUCAACAUCG
pyr-89	AUGAAGUGUUUGGGGGAACUC	gma-MIR395j	-54.10	0.93	DangsuA	UCUGUUGGCUGUCCCUUGGAGUUCCUCUGAACGCUUCAUGUUAGUGAGGGGGGUAGCCAAUGUAAACUGGUACCCAUUAUAAGCCUUAUUCAAUGAAGUGUUUGGGGGAACUCUUGGGUUCAAACU
pyr-89	AUGAAGUGUUUGGGGGAACUC	gma-MIR395k	-52.00	1.02	DangsuA	UUGUUGGCUGACUCUUGGAGUUCCUCUGAACGCUUCAUAUGAGAGGCUACCUAGUAAAAAAAUCUUUCAUUAGUAAAGAUAGUCCUUCUUCAAUGAAGUGUUUGGGGGAACUCCGGGAUUCAACUA
pyr-89	AUGAAGUGUUUGGGGGAACUC	gma-MIR395i	-48.10	0.87	DangsuA	CUGUUGGCUGUCUCCUGCAGUUCCUCUGAACGCUUCAUGUGAGGGGCUAGCAAGUGUAUACGUUAUAAUUUAGCCUUCUUCAAUGAAGUGUUUGGGGGAACUCUUGGGCUCAACCA
pyr-89	AUGAAGUGUUUGGGGGAACUC	bdi-MIR395q	-38.20	1.06	DangsuA	AAUUAUCAUGAGUUCCUUGCAAGCACUUCAUGAGGCACUAUCCCAAGGGCUACUAUGAAGUGUUUGGGGGAACUCUUGAUAUCA
pyr-89	AUGAAGUGUUUGGGGGAACUC	gma-MIR395l	-56.50	0.93	DangsuA	UUUUCUGUUGGCUGUCCUUUGGAGUUCCUCUGAACGCUUCAUGUUAGUGAGGGGGGUAGCCAGUGUAAACUGGACUGGUACCCAUUAUUAUAAGCCUUCUUAUGAAGUGUUUGGGGGAACUCUUGGGUUCAACU
pyr-89	AUGAAGUGUUUGGGGGAACUC	gma-MIR395m	-45.50	1.03	DangsuA	CUUUCUGUUGGUUGUCUCUUGGAGUUCCUCUGAACGCUUCAUGUGAUUGGCUAGUUAUAGGCCUUUGAUGAAGUGUUUGGGGGAACUCUUAGGUUCAACU
pyr-4569	GCUCACUUCUCUCUCUGUCAGC	osa-MIR156c	-90.40	1.24	DangsuB	GGAGGAAGAGAGGGGUGAGAGGUGAGGCUGACAGAAGAGAGUGAGCACACAUGGUGACUUUCUUGCAUGCUGAAUGGACUCAUGCUUGAAGCUAUGUGUGCUCACUUCUCUCUCUGUCAGCCAUUUGAUCUCUCUUUCUCUCUUUCUCC
pyr-4569	GCUCACUUCUCUCUCUGUCAGC	bdi-MIR156e	-65.60	1.02	DangsuB	GAGAUGGAGGCUGACAGAAGAGAGUGAGCACACAUGGUGCCUUUCUUGCAUGGUGAAUCAGAGAGAGGGAGAAAGAGCGUUCAUGCUUGAAGCUAUGUGUGCUCACUUCUCUCUCUGUCAGCCAUUACUUACA
pyr-4569	GCUCACUUCUCUCUCUGUCAGC	sof-MIR156	-66.80	0.94	DangsuB	GGUGGAGAAGAGGUGGAGGCUGACAGAAGAGAGUGAGCACACAUGGUGCCUUUCUUGCAUGAUGAACGAUCGAGAGGUUCAUGCUCGAAGCUAUGCGUGCUCACUUCUCUCUCUGUCAGCCGUUAGAACUCUCUCUC
pyr-4569	GCUCACUUCUCUCUCUGUCAGC	osa-MIR156g	-60.40	0.93	DangsuB	GGCUGACAGAAGAGAGUGAGCACACAGCGGGCAGACUGCAUCUGAAUUACCUGUUGCGACGAAGAAGACGACGGACGCAGCUUGCCGUUGCGUGCUCACUUCUCUCUCUGUCAGCU
pyr-4569	GCUCACUUCUCUCUCUGUCAGC	ppe-MIR156c	-79.10	0.85	DangsuB	UCUCUGUGGAUGUGGAAUAUAGUAAAGUAAAAUAGGGGAAGCUCAAGCUUGAAGCUACUGACAGAAGAGAGUGAGCACACAAACGCAGGCAAUUGUAUAAAAGCAUAUACCUUGGUGCGGUGCGUGCUCACUUCUCUCUCUGUCAGCUGCUGCUGCCGCCCUUGCCCUUCCAGUCUUUGAUCUCACUUAAAUUCACAGAGA
pyr-418	AGGAGAAAAAAAUCUGAUUUGUCA	gra-MIR7504e	-39.50	1.32	DangsuA	UAAUAGGAAAAUGACAAAUCUGAUUUUUCCUCCCGAUUUUUAGUAUUUCUAAUUGAAUUUGAAAAAAUAGGAAAAAGUUGAAAAUCAGGAGAAAAAAAUCUGAUUUGUCAUUCUUCUAUU
pyr-418	AGGAGAAAAAAAUCUGAUUUGUCA	gra-MIR7504f	-38.60	1.17	DangsuA	AAUAAGAGAAUGAUAAAUCAGAUUUUUCUUCUUGAUUUUCAGCCUUUUCCUCCAGAAAAAAUUUAAAUCAAAUUAAAAGCACAAAAAAUCAGGAGAAAAAAAUCUGAUUUGUCAUUCUCCCAUU
pyr-732	AGUCAAAUCUAAACGAUCGUGUAU	cme-MIR7129	-26.50	1.32	DangsuA	AGUCAAAUCUAAACGAUCGUGUAUCAAGUAAUCUUGAAAAGAAAUCGUUUAGAUUUGGCUAC
pyr-3512	AAGUGUUUGGGGGAACUC	rco-MIR395e	-38.70	1.14	DangsuA	CUAGAGUUCCCUUGAACACUUCACUGGGACGAAAAUCCAUUCUUCCAACUGAAGUGUUUGGGGGAACUCUUGGU
pyr-3512	AAGUGUUUGGGGGAACUC	rco-MIR395b	-46.10	1.02	DangsuA	CUGGAGUUCCCCUGGCCGCUUCAUUGGGGCUAUUAUAUACCCUUAAUUAUACAUGUGUUAUUCCUGCCCUACUGAAGUGUUUGGGGGAACUCUAGGU
pyr-3512	AAGUGUUUGGGGGAACUC	rco-MIR395a	-38.70	1.14	DangsuA	CUAGAGUUCCCUUGAACACUUCACUGGGACGAAAAUCCAUUCUUCCAACUGAAGUGUUUGGGGGAACUCUUGGU
pyr-3512	AAGUGUUUGGGGGAACUC	mdm-MIR395c	-59.90	1.09	DangsuA	GAAUCAGGUGUCCCCUAGAGUUCCCCCGAACACUUCAUUAAGAUCGAUGCAUAAGUUCUUUGUAUAUUAAAUGAUGAUUGCACCAUCUCUACUGAAGUGUUUGGGGGAACUCCGGGUGUCAUUUGAUC
pyr-3512	AAGUGUUUGGGGGAACUC	mdm-MIR395a	-44.80	1.04	DangsuA	CCUAGAGUUCCCCCGAAUACUUCAUUAGGAUCGAUACAUAAAUUCUUUGAAGGAUUGCACCGUCUCUACUGAAGUGUUUGGGGGAACUCCGGG
pyr-3512	AAGUGUUUGGGGGAACUC	mdm-MIR395f	-59.90	1.09	DangsuA	GAAUCAGGUGUCCCCUAGAGUUCCCCCGAACACUUCAUUAAGAUCGAUGCAUAAGUUCUUUGUAUAUUAAAUGAUGAUUGCACCAUCUCUACUGAAGUGUUUGGGGGAACUCCGGGUGUCAUUUGAUC
pyr-3512	AAGUGUUUGGGGGAACUC	mdm-MIR395e	-59.90	1.09	DangsuA	GAAUCAGGUGUCCCCUAGAGUUCCCCCGAACACUUCAUUAAGAUCGAUGCAUAAGUUCUUUGUAUAUUAAAUGAUGAUUGCACCAUCUCUACUGAAGUGUUUGGGGGAACUCCGGGUGUCAUUUGAUC
pyr-3512	AAGUGUUUGGGGGAACUC	sbi-MIR395a	-77.00	1.08	DangsuA	GGUUGGUUGGUUGUCACCUGGAGUUCUCCACAAACUACUUCAGUAGCAACACACACCCCUAGUUUAAUGCACCGUGUUUGCAUGUUUGUGUGGAGCUGUGUGUGUACAUAGUGAAGUGUUUGGGGGAACUCUGGGUGGCAAUCAGCAAUU
pyr-3512	AAGUGUUUGGGGGAACUC	sbi-MIR395j	-42.80	1.10	DangsuA	GUUCCCUUCAAGCACUUCACAUGAAGCUCUUUGCAUUAUAUUGGCGGAUGUAGCAUUGAGACCAAUGUGAAGUGUUUGGGGGAACUC
pyr-3512	AAGUGUUUGGGGGAACUC	ptc-MIR395k	-63.00	0.82	DangsuA	GAAACGCAAAGAACGUUAGCUGUCCCCCGGAGUUUCCCUGACCACUUCACUGGGGCUAUAAUUCUACUCUUCGUGUUCAAGGGUAGUGGCAACCCUUCCUCACUGAAGUGUUUGGGGGAACUCUGGGUGGCAUUUGACACUGUUUAGCAGUC
pyr-3512	AAGUGUUUGGGGGAACUC	ptc-MIR395e	-58.00	0.97	DangsuA	CUGUCCCCCGGAGUUUCCCUGACCACUUCACUGGGGCUAUAAUUCUACUCUUCGUGUUUAAGGGUAGAGGCAACCCUUCCUCACUGAAGUGUUUGGGGGAACUCUGGGUGGCA
pyr-3512	AAGUGUUUGGGGGAACUC	ptc-MIR395f	-58.30	0.97	DangsuA	CUGUCCCCCGGAGUUUCCCUGACCACUUCACUGGGGCUAUAAUUCUACUCUUCGUGUUUAAGGGUAGAGGCAACCCUUCCUCACUGAAGUGUUUGGGGGAACUCUGGGAGGCA
pyr-3512	AAGUGUUUGGGGGAACUC	sbi-MIR395c	-40.50	1.23	DangsuA	GAGUUCCCUACAAGCACUUCACGAGACCUUGGCUUAAUAAAGGGUUGUUUGUGAAGUGUUUGGGGGAACUCUU
pyr-3512	AAGUGUUUGGGGGAACUC	sbi-MIR395b	-50.00	1.06	DangsuA	GUUAGGUUUGGUGUCCCUAGGAGUUCUCUGCAAGCACUUCACGAGGCAUCGUUUUGAGAGCUUUUGUGAAGUGUUUGGGGGAACUCUUAGUGUCACAAAUCAUUU
pyr-3512	AAGUGUUUGGGGGAACUC	zma-MIR395o	-95.70	1.00	DangsuA	AGUUCUCUUCAAGCACUUCACGAGGCAUCACACUGAGAGCUUUUGUGAAGUGUUUGGGGGAACUCUUGGUGUCACAAAUCAUUUGCAUUUGCUUGAUGUUAGUCAUGCACCAUGUGAUAUGAGAUAAAGGACAUGGCAACGUUUUGUGUUACUAGGAGUUCCCUACAAGCACUUCAUGAGACCUUGACUUAAUAAAGGGCCAUUGUGAAGUGUUUGGGUGAACUCU
pyr-3512	AAGUGUUUGGGGGAACUC	sbi-MIR395g	-35.40	1.07	DangsuA	GUUCCCUAAAAGCACUUCACGAGACCUUGGCUUAAUAAAGGGCCCUUGUGAAGUGUUUGGGGGAACUC
pyr-3512	AAGUGUUUGGGGGAACUC	zma-MIR395j	-38.60	1.07	DangsuA	AGUUCCCUUCAAGCACUUCACAUGAGGCACCAUUCAAAUAACACAUUUCAAGAUUAGGUGCAUGUGAAGUGUUUGGGGGAACUCU
pyr-3512	AAGUGUUUGGGGGAACUC	zma-MIR395i	-39.90	1.25	DangsuA	AGUUCCCUACAAGCACUUCACGAUACCUUGGCUUAAUAAAGGCCAGUUGUGAAGUGUUUGGGGGAACUCU
pyr-3512	AAGUGUUUGGGGGAACUC	sbi-MIR395f	-59.40	1.24	DangsuA	ACAAUGUUUGGUGUUACCACGAGUUCCCUUCAAGCACUUCAUGAGGCACCAUUAAAUAACUCUAUUUAAGAUUAGGUGUAAUAUGAAGUGUUUGGGGGAACUCUUGGUGAUACUCAACAUCG
pyr-3512	AAGUGUUUGGGGGAACUC	zma-MIR395g	-29.00	1.00	DangsuA	AGUUCUAUGCAAGCACUUCACGAGGCAUUGUUUCAAGAGCUUUUGUGAAGUGUUUGGGGGAACUCU
pyr-3512	AAGUGUUUGGGGGAACUC	zma-MIR395f	-25.50	0.80	DangsuA	AGUUACCUACAAGCACGUCUCGAUACCUUGGCUUAAUAAAGGCCAGUUGUGAAGUGUUUGGGGGAACUCU
pyr-3512	AAGUGUUUGGGGGAACUC	zma-MIR395e	-38.60	1.07	DangsuA	AGUUCCCUUCAAGCACUUCACAUGAGGCACCAUUCAAAUAACACAUUUCAAGAUUAGGUGCAUGUGAAGUGUUUGGGGGAACUCU
pyr-3512	AAGUGUUUGGGGGAACUC	zma-MIR395d	-29.00	1.00	DangsuA	AGUUCUAUGCAAGCACUUCACGAGGCAUUGUUUCAAGAGCUUUUGUGAAGUGUUUGGGGGAACUCU
pyr-3512	AAGUGUUUGGGGGAACUC	sbi-MIR395e	-48.80	1.00	DangsuA	AUUAGGUUUGGUGUCCCCGGGAGUUCUCUGCAAGCACUUCACGAGGCACUAUUUUGAGAGCUUUUGUGAAGUGUUUGGGGGAACUCUUGAUGCCACUAACCAUUU
pyr-3512	AAGUGUUUGGGGGAACUC	zma-MIR395a	-78.20	1.04	DangsuA	UAUUGGUUGGUUGUCACCUGGAGUUCUCCUCAAACCACUUCAGUUGCUGCACCUAGCUAGUUUAAUGGCACUGUGCUUGCGUGCAAGCGGCCGGAGCUGUGUGUAGCUAGUGAAGUGUUUGGGGGAACUCUGGGUGUCAAUCAGCAAUU
pyr-3512	AAGUGUUUGGGGGAACUC	tcc-MIR395a	-56.70	0.91	DangsuA	AGAGAGUCAGCUGUCCUCUGGAGUUCCCCUGACCACUUCACUAGAGGUUUCCUGGACCCUUAAUAGGAAGAAACCUGACCUACUGAAGUGUUUGGGGGAACUCCUGUUGGCACCUGACAAUGU
pyr-3512	AAGUGUUUGGGGGAACUC	sbi-MIR395d	-50.20	1.12	DangsuA	UCAAGUUUGGUGUCCCCAGGAGUUCUCUGCAAACACUUCACAAAGCACUUUUUUAGAGCUUUUGUGAAGUGUUUGGGGGAACUCUUGGUGCCACUGAUCAUUU
pyr-3512	AAGUGUUUGGGGGAACUC	nta-MIR395a	-42.10	0.94	DangsuA	UUCCCCUUGAGUUCUCCUGAUCACUUCAUUGGGACUUGAAAAAUGCCCUUUAAAUUGAAAUGGUAUUAAUUAUUAAUGCCUACUGAAGUGUUUGGGGGAACUCUAGGAGCCAC
pyr-3512	AAGUGUUUGGGGGAACUC	mes-MIR395d	-57.80	1.01	DangsuA	GUCAGGUGUCUCCUGGAGUUCCCCUGAUCACUUCACUGGGGUGGGCUACAGUUUCCAGGAAACCCUACUGAAGUGUUUGGGGGAACUCCGGUGGCCAUUUGAC
pyr-3512	AAGUGUUUGGGGGAACUC	nta-MIR395c	-47.60	0.97	DangsuA	UUCCCCUAGAGUUCUCCUGAUCACUUCAUUGGGACUUCAAAAAUGCCCUUAAAAUGGAAAGGGUAUUAAUUAUUAAUGCCUACUGAAGUGUUUGGGGGAACUCCGGGAGCCAC
pyr-3512	AAGUGUUUGGGGGAACUC	mes-MIR395b	-32.30	0.98	DangsuA	GAGUUCCCUUGACCACUUCAUUGGGGCUAUAUACUCUACUACUCCCACUGAAGUGUUUGGGGGAACUC
pyr-3512	AAGUGUUUGGGGGAACUC	mes-MIR395a	-39.90	1.17	DangsuA	GAGUUCCCCUGAGCACUUCAUUGGGAGCCCUUAAUAUACUUUUGUCUUCCAACUGAAGUGUUUGGGGGAACUC
pyr-3512	AAGUGUUUGGGGGAACUC	zma-MIR395p	-37.40	1.04	DangsuA	AGUUCCCUUCAAGCACUUCACAUGAGGCACCAUUCAAAUGACAACUCCAUUUAAGAUUAUGUGUAAUGUGAAGUGUUUGGGGGAACUCU
pyr-3512	AAGUGUUUGGGGGAACUC	zma-MIR395n	-34.20	1.10	DangsuA	AGUUCUCUACAAGCACUUCACGAGGCUUCGUACUGAGAGCUUUUGUGAAGUGUUUGGGGGAACUCU
pyr-3512	AAGUGUUUGGGGGAACUC	zma-MIR395b	-58.80	1.25	DangsuA	GCAACGUUUUGUGUUACUAGGAGUUCCCUACAAGCACUUCACAAUACCUUGGCUCAAUAAAUUAAAGGCCAGUUGUGAAGUGUUUGGGGGAACUCUUGGUAUCAUGAAGCAUUU
pyr-3512	AAGUGUUUGGGGGAACUC	osa-MIR395p	-37.30	1.10	DangsuA	GAGUUCCCUUCAAGCACUUCACGUGGCACUAUUUCAAUGCGUACCGUGUGAAGUGUUUGGGGGAACUC
pyr-3512	AAGUGUUUGGGGGAACUC	osa-MIR395q	-36.20	1.29	DangsuA	GAGUUCCCUUCAAGCACUUCACAUGACACUAUUUCAAUGUCUAUUAUGUGAAGUGUUUGGGGGAACUC
pyr-3512	AAGUGUUUGGGGGAACUC	osa-MIR395r	-32.50	1.02	DangsuA	GAGUUCCCUUCAACCACUUCACGUGGCACUAUUUUAGGACCUACUAUGUGAAGUGUUUGGGGGAACUC
pyr-3512	AAGUGUUUGGGGGAACUC	osa-MIR395s	-42.00	1.02	DangsuA	GUAUCACCGUGAGUUCCCUUCAAGCACUUCACGUGGCACUAUUUCAAUGCCUAUUGUGAAGUGUUUGGGGGAACUCUCGAUGUUCC
pyr-3512	AAGUGUUUGGGGGAACUC	osa-MIR395y	-48.80	0.98	DangsuA	UGGCCCCAGGAGUUCCUUGCAAGCACUUCACAUAGAACUUCAGUUACUCUCAUACAACAUUGUGAUUUUGAGAAGCUAUUGUGAAGUGUUUGGGGGAACUCUCGGUGCCA
pyr-3512	AAGUGUUUGGGGGAACUC	zma-MIR395h	-38.60	1.07	DangsuA	AGUUCCCUUCAAGCACUUCACAUGAGGCACCAUUCAAAUAACACAUUUCAAGAUUAGGUGCAUGUGAAGUGUUUGGGGGAACUCU
pyr-3512	AAGUGUUUGGGGGAACUC	sbi-MIR395i	-44.70	1.02	DangsuA	GUUCCCUGCAAACACUUCACAAGCUAGACCAUAUAUAGUAUGCCCUUGCACAAUGUGGUAUCCAGUUACCUAGCUAGUGAAGUGUUUGGGGGAACUC
pyr-3512	AAGUGUUUGGGGGAACUC	cme-MIR395b	-40.60	1.16	DangsuA	CCUAGAGUUUCCCUGAACAACUUCAUCUAGGCGAGAAUUUUAAUAAUGCUUUCUUAGAUUGAAGUGUUUGGGGGAACUCUUGGUGUCAA
pyr-3512	AAGUGUUUGGGGGAACUC	cme-MIR395c	-31.90	0.97	DangsuA	CUUAGAGUUUCCCUGAACAACUUCACCUAGACAAGAAUUUUUAUAAUGCUUUCUUAGAUUGAAGUGUUUGGGGGAACUCUUGGUGUCAA
pyr-3512	AAGUGUUUGGGGGAACUC	osa-MIR395b	-45.40	1.11	DangsuA	GAGUCCCUAGGAGUUCCUUUCAAGCACUUUACGACACACUGUAUUGAGAGUUGUCGUGAAGUGUUUGGGGGAACUCUUAGUGUCGC
pyr-3512	AAGUGUUUGGGGGAACUC	cme-MIR395a	-45.00	1.18	DangsuA	ACUAGAGUUCCCUUGAGCACUUCAUUGGAAAAUUGGAAAAUUUGAAAAUUUCAAAUUUUUGUCCAAACCUACUGAAGUGUUUGGGGGAACUCUCGGUGACA
pyr-3512	AAGUGUUUGGGGGAACUC	osa-MIR395d	-45.50	1.11	DangsuA	GUAUUGUCGUGAGUUCCCUUCAAGCACUUCACGUGGCACUAUCUCAAUGCCUACUAUGUGAAGUGUUUGGGGGAACUCUCGAUAUCAC
pyr-3512	AAGUGUUUGGGGGAACUC	osa-MIR395e	-45.10	1.10	DangsuA	GUAUUAUCGAGAGUUCCCUUCAACCACUUCACGUGGCACUGUUUCAAGGCCUAUUGUGUGAAGUGUUUGGGGGAACUCUCGAUAUCAC
pyr-3512	AAGUGUUUGGGGGAACUC	cme-MIR395d	-43.90	1.16	DangsuA	CCUAGAGUUCCCUUCCAAGCACUUCAGCUGAAAAUGUCAAGAAAUUAUUGAUGUUUCUUUACUGAAGUGUUUGGGGGAACUCUCGGCGUAA
pyr-3512	AAGUGUUUGGGGGAACUC	cme-MIR395e	-43.30	1.03	DangsuA	UCUUGAGUUCCCUUCCAAGCACUUCAGAAGAAACAACAACCAUUUCUAGUCACAAAAUUUUGUGAUGUGUACUUUACAACUGAAGUGUUUGGGGGAACUCUAGAAGAUAC
pyr-3512	AAGUGUUUGGGGGAACUC	osa-MIR395h	-56.90	1.07	DangsuA	UUGUUACCUGGAGUUUCCUCAACACACUUCACAUCUGCUAGGCCCUAUUACAAUUGCGCAAUGUGGAGUCUGCAAUUGGUAGUGAAGUGUUUGGGGGAACUCUAGGUGGCAC
pyr-3512	AAGUGUUUGGGGGAACUC	osa-MIR395i	-47.20	1.10	DangsuA	GUUUUACCGGGAGUUCUCUUCAAGCACUUCACGUAGAGCUUUCUAUUGACAUGGAGCUUUAGAACAAUGUGAAGUGUUUGGGGGAACUCUUGGUACCAA
pyr-3512	AAGUGUUUGGGGGAACUC	osa-MIR395j	-52.40	1.03	DangsuA	GUGUUCCCAAGAGUUCCUUGCAAGCACUUCACAUAGAACUUCUGUUACUCUCAUGUAACAUUGGGAACUUGAGAAGCUACUGUGAAGUGUUUGGGGGAACUCUAGGUGGCAC
pyr-3512	AAGUGUUUGGGGGAACUC	osa-MIR395k	-46.00	1.12	DangsuA	GUUUUAUCGGGAGUUUCCUUCAAGCACUUCACGUAGAGCUUUCUAUUGAUAUGGAGCUUUGGAACAAUGUGAAGUGUUUGGGGGAACUCUUGAUACCAA
pyr-3512	AAGUGUUUGGGGGAACUC	osa-MIR395l	-43.30	1.11	DangsuA	GCGUUCCUUCCAAGCACUUCACACAGAGCUUUUAUUUCUCUCACAUCGAUUGAGAACUUAAUUAGAAGCUUUUGUGAAGUGUUUGGGGGAACUC
pyr-3512	AAGUGUUUGGGGGAACUC	osa-MIR395m	-57.60	1.13	DangsuA	GAGUUCUCCUCAAAUCACUUCAGUAGAUAGCUAGCUAGGCUUCAUUGCAUUACACUGUUACAAAACUGUGAGCAUGGGGCCAAAAGCUAGUUGUAUAUAGUGAAGUGUUUGGGGGAACUC
pyr-3512	AAGUGUUUGGGGGAACUC	osa-MIR395n	-39.60	1.28	DangsuA	GAGUUCCCUUCAAGCACUUCACGACGCACUAUUUAGAGAGUUGUUGUGAAGUGUUUGGGGGAACUC
pyr-3512	AAGUGUUUGGGGGAACUC	csi-MIR395	-49.00	1.00	DangsuA	AUGUCUCCGGGAGUUCCUCCGAUCACUUCAUUGGGGCUAUAUGAUCAUUUAGACAAAAUUUGUCACCCCACUGAAGUGUUUGGGGGAACUCUGGGUGCCAC
pyr-3512	AAGUGUUUGGGGGAACUC	mtr-MIR395a	-52.30	1.07	DangsuA	UUUUUGUUGAUUGUUUCUUAGAGUUCCUUUGAACGCUUCAUGCAUGAGAAUAUGUAUUUGGUCUAAUAUCCAUUAGAAAAGAUAGUUCUUCAUCAAUGAAGUGUUUGGGGGAACUCUUGGGUUCAACCAGCACCA
pyr-3512	AAGUGUUUGGGGGAACUC	mtr-MIR395c	-42.50	1.21	DangsuA	GAGUUCCUUUGAACGCUUCAUGCAUGAGAAUAUCUAUUUGGUCUAAUAUCCAUUAGAAAAGAUAGUCUUUUCUUCUAUGAAGUGUUUGGGGGAACUC
pyr-3512	AAGUGUUUGGGGGAACUC	mtr-MIR395d	-40.20	1.22	DangsuA	GAGUUCCUUUGAACGCUUCAUGCAUGAGAAUAUCUAUUUGGUCUAAAAUCCAUUAGAAAAAUAGUUCUUCUUAAAUGAAGUGUUUGGGGGAACUC
pyr-3512	AAGUGUUUGGGGGAACUC	mtr-MIR395e	-46.10	1.32	DangsuA	GAGUUCCUUUGAACGCUUCAUGCAUGAGAAUAUCUAUCUAUUUGGUUUAAAAUCCAUUAGGAUAGAUAGUUCUUCUUAAAUGAAGUGUUUGGGGGAACUC
pyr-3512	AAGUGUUUGGGGGAACUC	mtr-MIR395f	-37.50	1.10	DangsuA	GAGUUCCUUUGAACGCUUCAUGCAUGAGAAAUAUCUCUUUGGUUUAAAAUCCAUUAGAAAAGAUAGUAUUUUCUUCUAUGAAGUGUUUGGGGGAACUC
pyr-3512	AAGUGUUUGGGGGAACUC	mtr-MIR395g	-34.70	1.29	DangsuA	GAGUUCCUCUGAACGCUUCAUAUAAGAGGUUAUCCAUCUUCAUUGAAGUGUUUGGGGGAACUC
pyr-3512	AAGUGUUUGGGGGAACUC	mtr-MIR395i	-30.00	1.03	DangsuA	GAGUUCCUCUGAAUGCUUCAAUCAUGAGACAAUCUAUAUGAAUAGUUCUUGUUCAAUGAAGUGUUUGGGGGAACUC
pyr-3512	AAGUGUUUGGGGGAACUC	mtr-MIR395j	-33.00	1.10	DangsuA	GAGUUCCUCUGAAUGCUUCAAACAUGAGACAAUCUAUAUGGAUAGUUCUUGUUCAAUGAAGUGUUUGGGGGAACUC
pyr-3512	AAGUGUUUGGGGGAACUC	mtr-MIR395l	-39.10	1.06	DangsuA	GAGUUCCUUUGAACGCUUCAUGCAUGAGAAUAUCUAUCUAUUUGGUCUAAAGUCCAUUAGAAAAGAUAGCCAUUUUUUCAAUGAAGUGUUUGGGGGAACUC
pyr-3512	AAGUGUUUGGGGGAACUC	mtr-MIR395m	-41.10	1.17	DangsuA	GAGUUCCUUUGAACGCUUCAUGCAUGAGAAUAUCUAUCUAUUUGGUCUAAAAUCCAUUAGAAAAGAUAGUUCUUCUUAAAUGAAGUGUUUGGGGGAACUC
pyr-3512	AAGUGUUUGGGGGAACUC	mtr-MIR395n	-39.10	1.06	DangsuA	GAGUUCCUUUGAACGCUUCAUGCAUGAGAAUAUCUAUCUAUUUGGUCUAAAGUCCAUUAGAAAAGAUAGCCAUUUUUUCAAUGAAGUGUUUGGGGGAACUC
pyr-3512	AAGUGUUUGGGGGAACUC	mtr-MIR395o	-32.40	0.95	DangsuA	GAGUUCCUCUGAACUCUUCAUCUAAAGGGCUAUAGCAAGAAAGAAAGGAAAAUCCUUGUAUGAUGAAGUGUUUGGGGGAACUC
pyr-3512	AAGUGUUUGGGGGAACUC	cme-MIR395f	-39.50	0.92	DangsuA	UCUUGAGUUCCCUUCCAAACACUUCAGAAGAAACAACAACCAUAGCUAAUAUCACAAAUUAAAACUUUAUGAGAUGCAACUUUCAGCUGAAGUGUUUGGGGGAACUCUGGAAGAUA
pyr-3512	AAGUGUUUGGGGGAACUC	osa-MIR395g	-41.70	1.04	DangsuA	GUAUCACCGUGAGUUCCCUUCGAACACUUCACGUGGCACUAUUUCAAUGCCUAUUGUGAAGUGUUUGGGGGAACUCUCGAUGUCAU
pyr-3512	AAGUGUUUGGGGGAACUC	cpa-MIR395e	-39.20	1.31	DangsuA	GUUCCCCUGAGCACUUCACCGGAGAUAUAUAUAUAUAUAUAUAUCAAUCUCGCUGAAGUGUUUGGGGGAACUC
pyr-3512	AAGUGUUUGGGGGAACUC	cpa-MIR395d	-25.90	0.78	DangsuA	GUUUCCCUGACCACUUCAAUGCAUGCGGGCUCAUUUUAGGCCUAAUACUGAAGUGUUUGGGGGAACUC
pyr-3512	AAGUGUUUGGGGGAACUC	cpa-MIR395a	-33.40	1.34	DangsuA	GUUCCCUUAAACACUUCACUGGAUGUUAUCAUUCCACUGAAGUGUUUGGGGGAACUC
pyr-3512	AAGUGUUUGGGGGAACUC	cpa-MIR395c	-29.70	0.96	DangsuA	GUUUCCCUGACCACUUCAUUGCAUGAGGGCUGAAUUUAGUCCUAAUACUGAAGUGUUUGGGGGAACUC
pyr-3512	AAGUGUUUGGGGGAACUC	cpa-MIR395b	-28.70	1.25	DangsuA	GUUCCCUUAAACACUUCACUGAAUUUCAUUAUUCCACUGAAGUGUUUGGGGGAACUC
pyr-3512	AAGUGUUUGGGGGAACUC	ppe-MIR395f	-61.50	1.14	DangsuA	CAUCAGGUGUCCCCUAGAGUUUCCUCGAACACUUCAUUAGGAUGUCUAACUCUCUUAAUUAAACUAAUUAAGGGAUAAGUUAUACUUACAGUCUCUACUGAAGUGUUUGGGGGAACUCCGGGUGUCAUUUGAUG
pyr-3512	AAGUGUUUGGGGGAACUC	ppe-MIR395c	-50.80	1.21	DangsuA	GUCAAGUGUCACUGAGAGUUCCCUUGACCACUUCAUUGGGAAAUAAUUCUUUCUGAUCAAUUAUAUAUCUUACUGAAGUGUUUGGGGGAACUCCUAGUGGCAUUUGAU
pyr-3512	AAGUGUUUGGGGGAACUC	ppe-MIR395n	-58.30	1.33	DangsuA	UCAGGUGUCACCUAGAGUUCUCUUGACCACUUCAUUGGGAAAUAGUCUUCUUUCGACUAUACAUUCUACUGAAGUGUUUGGGGGAACUCUAGGUGGCAUUUGA
pyr-3512	AAGUGUUUGGGGGAACUC	ppe-MIR395m	-57.80	0.86	DangsuA	GUCAGUUGUCCCCUAGAGUUUCCCUGACCACUUCACUGGGAUCAAGCUUUCCAAAACCCUUCAACUGAGGGUGAAAUUCCAUGCAUGCCAUCCCACUGAAGUGUUUGGGGGAACUCUGGUUGCCACCUGAC
pyr-3512	AAGUGUUUGGGGGAACUC	sly-MIR395a	-59.40	0.78	DangsuA	AGGGCUUACUUUGAUGUUGGAAGCCUUGCUGAAGUGUUUGGGGGAACUCCCGGGUUGACUUUGAAAAUUACGCAAACAAGUAUAUAUAAAUGCAUGAGUACGUAUUAGCUAAAGAUGAUGAGUACAAUAUUGAUUCAUGUACCUUUGGAGUUCCCUUGACCACUUCAUGAGAGCUUAAUAUUUGAUUGUUUGAAGUCCU
pyr-3512	AAGUGUUUGGGGGAACUC	aly-MIR395e	-55.20	1.20	DangsuA	GUCGGAUGUUUCCUAGAGUUCCUCUGAGCACUUCAUUGGAGAUACCAUCUUUUAUCAAAUGGUUUUCUACUGAAGUGUUUGGGGGAACUCCCGGACUCAUUCGAU
pyr-3512	AAGUGUUUGGGGGAACUC	vvi-MIR395g	-43.00	1.00	DangsuA	GUCCCCUAGAGUUCCCCUGAGCACUUCAUUGGGGAUCCUUAGUUUUCAAUUCCUACUGAAGUGUUUGGGGGAACUCCCGGUGUCAU
pyr-3512	AAGUGUUUGGGGGAACUC	nta-MIR395b	-40.60	0.90	DangsuA	UUCCCCUUGAGUUCUCCUGAUCACUUCAUUGGGACUUGAAAAAUGCCCUUAAAUUGAAAUGGUAUUAAUUAUUAAUGCCUACUGAAGUGUUUGGGGGAACUCUAGGAGCCAC
pyr-3512	AAGUGUUUGGGGGAACUC	vun-MIR395	-34.10	1.03	DangsuA	GAGUUCCCUUGAACGCUUCAUUAAGGGUUGUAUCAUUCGUAUAAACAGAUAAUUCCAUACUGAAGUGUUUGGGGGAACUCC
pyr-3512	AAGUGUUUGGGGGAACUC	stu-MIR395i	-27.50	0.89	DangsuA	GUUCCCUUGACCACUUCAUGAUGGUUUAAUAACUUCAUUUUUUGUGCCCUCCUGAAGUGUUUGGGGGAACUC
pyr-3512	AAGUGUUUGGGGGAACUC	stu-MIR395h	-27.50	0.89	DangsuA	GUUCCCUUGACCACUUCAUGAUGGUUUAAUAACUUCAUUUUUUGUGCCCUCCUGAAGUGUUUGGGGGAACUC
pyr-3512	AAGUGUUUGGGGGAACUC	stu-MIR395j	-30.00	1.11	DangsuA	GUUCCCUUGACCACUUCAUUAGGAAUUAAUUACUUCAUUUUUAAUGUCCUACUGAAGUGUUUGGGGGAACUC
pyr-3512	AAGUGUUUGGGGGAACUC	stu-MIR395e	-28.60	0.87	DangsuA	GUUCUCUUGACCGCUUCAUUAGGGUUUACUUCGUUGUUUGAUGCCCUGCUGAAGUGUUUGGGGGAACUC
pyr-3512	AAGUGUUUGGGGGAACUC	stu-MIR395d	-30.00	1.11	DangsuA	GUUCCCUUGACCACUUCAUUAGGAAUUAAUUACUUCAUUUUUAAUGUCCUACUGAAGUGUUUGGGGGAACUC
pyr-3512	AAGUGUUUGGGGGAACUC	stu-MIR395g	-26.80	0.81	DangsuA	GUUCCCUUGACCACUUCAUCAUGAGGGGUUGAUAUCUUCUUUUUUGAUGUCUUGCUGAAGUGUUUGGGGGAACUC
pyr-3512	AAGUGUUUGGGGGAACUC	stu-MIR395f	-34.50	1.01	DangsuA	GUUCCCUUGACCACUUCAUGAGGGCUUACUUCGUUGUUUGAAGCCCUACUGAAGUGUUUGGGGGAACUC
pyr-3512	AAGUGUUUGGGGGAACUC	stu-MIR395a	-28.80	0.90	DangsuA	GUUCCCUUGACCACUUCAUGAGGGAUUAAUUUCUUCAUUUUUGUUGCCCUGCUGAAGUGUUUGGGGGAACUC
pyr-3512	AAGUGUUUGGGGGAACUC	stu-MIR395c	-31.40	0.98	DangsuA	GUUCCCUUGACCACUUCAUGAGGGCUUAAUUACUUCAUUUUUGAUGUCCUGCUGAAGUGUUUGGGGGAACUC
pyr-3512	AAGUGUUUGGGGGAACUC	stu-MIR395b	-28.80	0.90	DangsuA	GUUCCCUUGACCACUUCAUGAGGGAUUAAUUUCUUCAUUUUUGUUGCCCUGCUGAAGUGUUUGGGGGAACUC
pyr-3512	AAGUGUUUGGGGGAACUC	sbi-MIR395h	-37.00	1.06	DangsuA	GUUCCCUUCAAGCACUUCACAUGAGGCACCAUUCAAACUCUGUUUAAGAUUAGGUGUAAUGUGAAGUGUUUGGGGGAACUC
pyr-3512	AAGUGUUUGGGGGAACUC	gma-MIR395c	-37.30	0.93	DangsuA	CCUAGAGUUCCCCUUAAUGCUUCAUUGAGGAUUCUGUUUAGGUCCAAUUUAACUAGUCCCUACUGAAGUGUUUGGGGGAACUCCGGG
pyr-3512	AAGUGUUUGGGGGAACUC	gma-MIR395a	-46.70	0.97	DangsuA	UCAGGUUUUCCCUAGAGUUCCCCUGAACGCUUCAUUAAAGGGCUUUAUUAUCAUAUAGUCCCAAGUUAGUCCAUACUGAAGUGUUUGGGGGAACUCCCGGUGAUACUUGA
pyr-3512	AAGUGUUUGGGGGAACUC	gma-MIR395j	-54.10	0.93	DangsuA	UCUGUUGGCUGUCCCUUGGAGUUCCUCUGAACGCUUCAUGUUAGUGAGGGGGGUAGCCAAUGUAAACUGGUACCCAUUAUAAGCCUUAUUCAAUGAAGUGUUUGGGGGAACUCUUGGGUUCAAACU
pyr-3512	AAGUGUUUGGGGGAACUC	gma-MIR395k	-52.00	1.02	DangsuA	UUGUUGGCUGACUCUUGGAGUUCCUCUGAACGCUUCAUAUGAGAGGCUACCUAGUAAAAAAAUCUUUCAUUAGUAAAGAUAGUCCUUCUUCAAUGAAGUGUUUGGGGGAACUCCGGGAUUCAACUA
pyr-3512	AAGUGUUUGGGGGAACUC	ath-MIR395d	-41.90	1.05	DangsuA	AUGUCCUCUAGAGUUCUCCUGAACACUUCAUUGGAAAUUUGUUAUUCAGUAAGCUAACAGUUAAUUCCACUGAAGUGUUUGGGGGAACUCCCGAUGUCAU
pyr-3512	AAGUGUUUGGGGGAACUC	ath-MIR395e	-39.10	1.09	DangsuA	AUGUUUUCUAGAGUUCCUCUGAGCACUUCAUUGGAGAUACAAUUUUUUAUAAAAUAGUUUUCUACUGAAGUGUUUGGGGGAACUCCCGGGCUGAU
pyr-3512	AAGUGUUUGGGGGAACUC	gma-MIR395l	-56.50	0.93	DangsuA	UUUUCUGUUGGCUGUCCUUUGGAGUUCCUCUGAACGCUUCAUGUUAGUGAGGGGGGUAGCCAGUGUAAACUGGACUGGUACCCAUUAUUAUAAGCCUUCUUAUGAAGUGUUUGGGGGAACUCUUGGGUUCAACU
pyr-3512	AAGUGUUUGGGGGAACUC	ath-MIR395a	-41.00	1.00	DangsuA	AUGUCUCCUAGAGUUCCUCUGAGCACUUCAUUGGGGAUACAAUUUUUCUAAAUGAUUAUCCACUGAAGUGUUUGGGGGAACUCCCGGACCCAU
pyr-3512	AAGUGUUUGGGGGAACUC	gma-MIR395i	-48.10	0.87	DangsuA	CUGUUGGCUGUCUCCUGCAGUUCCUCUGAACGCUUCAUGUGAGGGGCUAGCAAGUGUAUACGUUAUAAUUUAGCCUUCUUCAAUGAAGUGUUUGGGGGAACUCUUGGGCUCAACCA
pyr-3512	AAGUGUUUGGGGGAACUC	tcc-MIR395b	-54.70	0.94	DangsuA	UAUGCCAGGUGCCCACUAGAGUUCCCCUGGGCACUUCAGUUGAUUUCUUUAGAGCUCAAAACCUCUUACCUGUCUACUGAAGUGUUUGGGGGAACUCCGGUUGCCAUCUGAGACAGU
pyr-3512	AAGUGUUUGGGGGAACUC	ppe-MIR395k	-52.80	1.32	DangsuA	CCUGGAGUUCCCUUGAACACUUCAUUGGGAAAAUUAUAAGGGUAGUUCAUAUGUACCCUAAUUUAUCCUACUGAAGUGUUUGGGGGAACUCUGGG
pyr-3512	AAGUGUUUGGGGGAACUC	gma-MIR395m	-45.50	1.03	DangsuA	CUUUCUGUUGGUUGUCUCUUGGAGUUCCUCUGAACGCUUCAUGUGAUUGGCUAGUUAUAGGCCUUUGAUGAAGUGUUUGGGGGAACUCUUAGGUUCAACU
pyr-3512	AAGUGUUUGGGGGAACUC	ppe-MIR395l	-55.40	1.20	DangsuA	UCAGGUGUCACCUAGAGUUCCUCUGACCACUUCAUUGGGAAAUAGUCUUCUUGUAACUAUACAUCCUACUGAAGUGUUUGGGGGAACUCCAGGUGGCAUUUGA
pyr-3512	AAGUGUUUGGGGGAACUC	bdi-MIR395l	-50.10	1.04	DangsuA	GUUUGGUAUUAUCAUGAGUUCCCUGCAAGCACUUCACGAGGCACUAUCCCAAGGGCUACUGUGAAGUGUUUGGGGGAACUCUUGGUGUCACCAAGC
pyr-3512	AAGUGUUUGGGGGAACUC	bdi-MIR395m	-41.50	0.92	DangsuA	UGGUAUUACCAUGAGUUCCUUUGCAAGCAUUUCACGUACGAGGCACUAUCCCAAGGGCUAUUGUGAAGUGUUUGGGGGAACUCUUGGUGUCACCA
pyr-3512	AAGUGUUUGGGGGAACUC	bdi-MIR395n	-46.60	1.04	DangsuA	UGGUAUUACCAUGAGUUCCCUGCAAGCACUUCACCAUGCACUACCCCAAGGGCUAUUGUGAAGUGUUUGGGGGAACUCUUGGUGUCACCA
pyr-3512	AAGUGUUUGGGGGAACUC	bdi-MIR395o	-39.20	1.09	DangsuA	UAUUAUCAUGAAUUCCCUACAAGCACUUCACAAGAAGCUAUUCCUAGGGCUAUUGUGAAGUGUUUGGGGGAACUCUUGAUGUCACC
pyr-3512	AAGUGUUUGGGGGAACUC	bdi-MIR395h	-47.30	1.18	DangsuA	ACCAUGAGUUCCCUGCAAGCACUUCACGAGGCCGUUUUCUGAGGGCUACUGUGAAGUGUUUGGGGGAACUCUUGGU
pyr-3512	AAGUGUUUGGGGGAACUC	bdi-MIR395j	-45.70	0.99	DangsuA	GGUAUUCUCAUGAGUUUCCCGCAAGCACUUCACGAGGCCGUUUUCUGAGGGCUACUGUGAAGUGUUUGGGGGAACUCUUGGUCUCACC
pyr-3512	AAGUGUUUGGGGGAACUC	bdi-MIR395k	-49.20	1.14	DangsuA	GUACUACCAUGAGUUCCCUGCAAGCACUUCAUGAGGCCCAAUUCUGAGGGCUACUGUGAAGUGUUUGGGGGAACUCUUGGUGUUAC
pyr-3512	AAGUGUUUGGGGGAACUC	ppe-MIR395j	-58.40	1.22	DangsuA	GUCAGUUGUUCCUGGAGUUCCCUUGAACACUUCAUUGGGGAAAUUAUAAGGGUAGUUCAUAUGUACCUUAAUUUAUCCUACUGAAGUGUUUGGGGGAACUCUGGGUAUCAUCUGAC
pyr-3512	AAGUGUUUGGGGGAACUC	bdi-MIR395e	-78.40	1.02	DangsuA	GUUGGUUGUCACCUGGAGUUCUCCUCAAAUCACUUCAGUAGCUAGCUAGCUUGUGCCUCCUUGUUGCAUUGCCACUGUUUUAUAAGUGUGCUUGGGGCCAGAGAGCUGUGCACAGUGAAGUGUUUGGGGGAACUCUGGGUGGCAACCAGC
pyr-3512	AAGUGUUUGGGGGAACUC	bdi-MIR395f	-58.00	1.26	DangsuA	GUUUGGUGUCCCCGGGAGUUCCCUUCAAACACUUUACGAAGCAUCUUUCUAAGACUAUUUGUGAAGUGUUUGGGGGAACUCUCGGUGUCACCAAGC
pyr-3512	AAGUGUUUGGGGGAACUC	bdi-MIR395g	-49.30	1.20	DangsuA	GGUGUUACCAGGAGUUUCCUGCAAACACUUCACGAGUGCCUAUUUUAAUGGGUUGUUGUGAAGUGUUUGGGGGAACUCUUGAUGUCACC
pyr-3512	AAGUGUUUGGGGGAACUC	bdi-MIR395a	-79.80	0.91	DangsuA	CAGGAGAUGAAUGGUUGGUUGUCAACUGGAGUUCUCCUCAAAUCACUUCAGUAGCUAGCUAGCUAGCUUGUGCCUCAUUGUUUCAUUGCCGCUGUUUAUAAGUGUGCAUGGAGCUGGAGAGCCGUGCACAGUGAAGUGUUUGGGGGAACUCCGGGUGGCAACCAACAAUACUGAUAUCACC
pyr-3512	AAGUGUUUGGGGGAACUC	bdi-MIR395b	-54.10	0.97	DangsuA	CGGACCACGUUUGGUAUUACCAUGAGUUCCCUGCAAGCACUUCACGAGGCCCAAUUAUGAUGGCUACUGUGAAGUGUUUGGGGGAACUCUUGGUGUCACCAAGCUUACACAAAUAAAAAGA
pyr-3512	AAGUGUUUGGGGGAACUC	bdi-MIR395c	-61.80	1.03	DangsuA	GGCGGCAGACCACGUUUGGUAAUACCAUGAGUUCCCUGCAAGCACUUCAUGAGGCCUAAUUCUAAGGGCUACUGUGAAGUGUUUGGGGGAACUCUUGGUGUUACCAAGCUUUUACAACAAAAGGAG
pyr-3512	AAGUGUUUGGGGGAACUC	tae-MIR395a	-35.80	1.05	DangsuA	CUUACAGUGGGUUCCUUGCAAGCACUUCAUGAGGCAUUAUUAAAAAUGCCACUGUGAAGUGUUUGGGGGAACUCUUG
pyr-3512	AAGUGUUUGGGGGAACUC	bdi-MIR395q	-38.20	1.06	DangsuA	AAUUAUCAUGAGUUCCUUGCAAGCACUUCAUGAGGCACUAUCCCAAGGGCUACUAUGAAGUGUUUGGGGGAACUCUUGAUAUCA
pyr-3512	AAGUGUUUGGGGGAACUC	tae-MIR395b	-57.10	1.02	DangsuA	CUGAAGUGUUUGGGGGAACUCUUGGUGUCACCAAGCAUUUAGUAGACAUUGGCCACAUAUCAUAAGAGAGAUGCAUCAAUGGGCUGAAUGUUUGGUCUUACCAUGGGUUCCUUGCAAGCACUUC
pyr-3512	AAGUGUUUGGGGGAACUC	lus-MIR395d	-94.90	0.92	DangsuA	GGCCGAAGUCAGAUGUCGACUGGAGUUCCCUUGACCACUUCAUUGAGAAGCUAAUGCUAAGUGCUUUCACUGAAGUGUUUGGGGGAACUCUAGGGGUCAUUUGACAAAAAAUUUACGAGGGCUUUAGUCAGAUGUUAACUGGAGUUCCCUUGACCACUUCAUUGGAAAGUUGAUGCUACAAGCUCUCAUUGAAAUGUUUGGGGAAACUCUACAAGCCAUUUGACAAAAAAAUGUUGGCC
pyr-3512	AAGUGUUUGGGGGAACUC	lus-MIR395c	-50.90	1.02	DangsuA	GUCAGAUGUCUACUGGAGUUCCCUUGACCACUUCAUUGGGGACUCGUCAUCUUUCGGUCCUACUGAAGUGUUUGGGGGAACUCUAGCAGCCCAUUUGAC
pyr-3512	AAGUGUUUGGGGGAACUC	lus-MIR395b	-54.30	1.06	DangsuA	ACCAGGUCUCCCCUGGAGUUCCCCUGAACGCUUCACUGAGAGGCUCUGUCAUUCUUACUGAAGUGUUUGGGGGAACUCUGGCUGUGGCUUGGU
pyr-3512	AAGUGUUUGGGGGAACUC	lus-MIR395a	-52.60	1.03	DangsuA	AUCAGUUGUCUCCUUGAGUUCUCCUCAUCACUUCAUUGGGUUAACUUGUUGAUUUAUGUAUGAUGAUCAUAAGCAAGCAUCCUACUGAAGUGUUUGGGGGAACUCUGGGCGGCAUCUGAU
pyr-3512	AAGUGUUUGGGGGAACUC	aly-MIR395d	-54.90	1.00	DangsuA	ACAAAAUAUAAUUCGACUAGAUGUCCUCUAGAGUUCUCCCGAACACUUCAUUGGAAAUUUGUUAUUCGGUAAACUACCAAUUAAUUCCACUGAAGUGUUUGGGGGAACUCCGGAUGUCAUUUGGUGAUGUCAAGCCAUGU
pyr-3512	AAGUGUUUGGGGGAACUC	ata-MIR395c	-66.90	1.06	DangsuA	GUCACCUGGAGUUCUCCUCAAAUCACUUCAAUUGCUAGCUUAUGCCUAAUUGUUGCAUUGGCACUGUUUUAAAGUGUGCAUUGCAGGGAUAAGAGAGGCGUGCAUAGUGAAGUGUUUGGGGGAACUCUGGGUGGCAA
pyr-3512	AAGUGUUUGGGGGAACUC	ata-MIR395b	-75.20	0.74	DangsuA	CUUACUGCGGGUUCCCUGCAAACACUUCACGAAGCAUUAUUUCAAACGCCAUUGCGAAGUGUUUGGAGGAACUCUUGGUGAAGUCAAGCUCCAAGAACUAAGAAGGUGAUCAAUACGAAGCAUGUUUGGUCUUACCGUGGGUUCCCUACGAGCACUCCACGAGGCAUUAUUCCAAAUACCACUGUGAAGUGUUUGGGGGAACUCUUGGUGAUGC
pyr-3512	AAGUGUUUGGGGGAACUC	ata-MIR395a	-44.10	1.08	DangsuA	CUCGUCGGGAGUUCCCUUCAAGCACUUCAGGAAGCAUCUUUUGUAGGGCAUUUCUGAAGUGUUUGGGGGAACUCUUGUUGUCAC
pyr-3512	AAGUGUUUGGGGGAACUC	ata-MIR395f	-41.70	0.99	DangsuA	CUCGUCGGGAGUUCCCUUCAAGCACUUCAGGAAGCAUCUCUUUCAAGGCAUUUCUGAAGUGUUUGGGGGAACUCUUGUUGUCGC
pyr-3512	AAGUGUUUGGGGGAACUC	ata-MIR395e	-45.20	1.13	DangsuA	CUUACCGUGGGUUCCUUACAAGCACUUCACGAGGCAUUAUUACAAAUGCCACUGUGAAGUGUUUGGGGGAACUCUUGGUGAUGC
pyr-3512	AAGUGUUUGGGGGAACUC	ata-MIR395d	-90.20	0.93	DangsuA	GUAUUACUGGGAGUUCCCUUCAAGCACUUUACGAACUACUUUUUUAAGGUAUUAUGUGAAGUGUUUGGGGAACUCUUGGUGCAACUAAGCACUUAAAAGAUAUUGCAAGUCAUAAACCACACGAGAUGUACUGCAAAUCCCGUUUGGUAUCACUGGGAAUUCCUUUCAAACACUUUACGGAUCACCUUUCUCAGGGCUCAUGUGAAGUGUUUGGGGGAACUCUCGGUGUAAC
pyr-1406	UUUUGUUGUGGAUGGCAGAAG	mtr-MIR5234	-35.10	0.64	DangsuB	AUAAUAUUAUGCCUUCUUUGUUUCUGACAUAUCAACAUCUUCCUUCCCAUUUGAAAAGAUGUUUUGCCUAUUGCUCGAUUUUUCCAAAGGGCUAUCCCUUUAAUAGGAAGAAAUUGAUUUUGUUGUGGAUGGCAGAAGGCUUCCUCGAACAUU
pyr-358	UUUGGAGUGAAGGGAGCUCUG	zma-MIR159i	-106.70	0.80	DangsuB	AGUUUGAUUCACUAGACCUGAUCCCCUAGACUAGACGGUCUGGUCUUAAGGCGGUGCUCCCUUCACACCAAUAAACGGUCGAUCUGAUGGGUGGUACAGCUGCUCGUUCAUGGUUCCCACUGUCCCAUCUCAUCAGAGAGAGAGAAGAUCAUGAGAGAGCGAGAGAUGCUUGAGAUGGGCUUGUGGUUUGCAUGACCGAGGAGCUGCCUCGUCCCCUUCGUUGACCGCUGUUUGGAGUGAAGGGAGCUCUGC
pyr-358	UUUGGAGUGAAGGGAGCUCUG	zma-MIR159h	-93.40	0.85	DangsuB	GGUGCUCCCUUCACACCAAUAAACGGUCGAUCUGAUGGGUGGUACAGCUGCUCGUUCAUGGUUCCCACUGUCCCAUCUCAUCAGAGAGAGAGAAGAUCGUGAGAGAGCGAGAGAUGCUUGAGAUGGGCUUGUGGUUUGCAUGACCGAGGAGCUGCCUCGUCCCCUUCGUUGACCGCUGUUUGGAGUGAAGGGAGCUCUGC
pyr-4740	ACGGGUGAGUAAGAUAAGGGGUAU	pgi-MIR6136a	-107.40	1.38	DangsuA	UAUAUACUUAUUUUACUCACCCGUGCUCAUCUCUUUAGACGACGGUUUCGGUCAUACAACCAUCAUUUAUACUUUUAGCGACGCUAUAUGUUGUCCGUCGACUAAAAGUAUAGACGACGGUUGUAUGACCGAAACGUCGCCUAAAGGGAGGUUAGCACGGGUGAGUAAGAUAAGGGGUAUG
pyr-2001	AUGUGUACUAUAGAAGUCAAGGGU	bdi-MIR7771	-67.50	1.44	DangsuB	UUUGCCGAGGAUUUACAACCCUUGACUCCUAUAGUACACAUUCCCGAUAUUGAAAAUGUCAAGUAAAUUAAUUUAGUAAAGUUUUGGUAUUUGGAAUGUGUACUAUAGAAGUCAAGGGUUGUAAGCCCUUUGCAAAU
pyr-1677	UCUGCAUUUGCACCUGCACCU	tcc-MIR530b	-77.10	0.92	DangsuA	GCUAAGAUGUAGCCUUUAUCUGCAUUUGCACCUGCACCUUCUUGUUUUUAUUUGGUUCACUUCAGCACCCUUCUGCUUUAGAAACCAAAGCUUGGGCAGAUGUGUUUGUGGUGGAGGAAGAUAAGGGCCAAGCAAAGAGGUGCAGGGGCAGCUGCAGGUGAAUGCCAUUUUGGCUUCU
pyr-1677	UCUGCAUUUGCACCUGCACCU	tcc-MIR530a	-74.20	0.92	DangsuA	CCAACAAGUCUCCAUUUAUCUGCAUUUGCACCUGCACCUCUUUCUCUACACUUCCAGCAGCCAGGGAGAUGAACAACAUUCUCCAUGGACGGUUGCCGAAAUCUUGUUGGUUGGACGGGGAGAGGUGCAGAUGCAGGUGCAGACAAAUGGCCUCUUGGUUUUA
pyr-1677	UCUGCAUUUGCACCUGCACCU	mes-MIR530a	-54.90	0.90	DangsuA	UUCAUCUGCAUUUGCACCUGCACCUUACUUUUCUUUUUCUUCAACAAUCAAGCUUCUACUUUCUCUAUGUUACCCACCAGAUUUUUUUUUAUUCAAGAGAAGCUGCAGGAAACUGAAGGGAAUAGAGGUGCAGGUGUGAGUGCAGGCGAA
pyr-1677	UCUGCAUUUGCACCUGCACCU	mes-MIR530b	-68.50	1.07	DangsuA	GCCAAAAUGUUGCCUUUAUCUGCAUUUGCACCUGCACCUUACUUUUGUUUCUUUAAAAAUUUCAACAAUCAAGAUCCUUGUUUUUCCUCUCAUUUCUAGAGUGUCAGAGAAACUUUUUGAUCCAAGAAAAGAGAGGUGCAGGUGUAAGUGCAGGUGAAUGCCAUUUUGGU
pyr-1677	UCUGCAUUUGCACCUGCACCU	ppe-MIR530	-58.70	0.99	DangsuA	GAUAGCCAAGAUGGUUUCAUUUAUCUGCAUUUGCACCUGCACCUCUUUUGGUCUUUACUGGUUUUCUCAUGCACUGAUGAACUCAGAGAUCCAUGCAUAGGUGCAAGUGUAAGUGCAGACAAAUGCCUUCUUGGUUUUUUC
pyr-1677	UCUGCAUUUGCACCUGCACCU	cme-MIR530a	-44.64	0.69	DangsuA	CCCUUCAUCUGCAUUUGCACCUGCACCUUAUUCAACUUCUCUCUUCUCUCUCCACCAACGAUAUAGAAGAACAUGAGUAUGAAGAACAAAAGGUGAGAGAAAAAAAGGAUCAAUAAUUCAAAGGUGCUGGUGCAUUUGCAGCUGAAUGCCAUCUUGGAAA
pyr-1677	UCUGCAUUUGCACCUGCACCU	ptc-MIR530a	-74.60	1.26	DangsuA	GCCAACAUGUUGCCUUUAUCUGCAUUUGCACCUGCACCUUACUUGUUUCUUUCUUUUGUUUUUGACUCCAAAACCAAAAGUAAGUUUGAAACAUUAAAACAAGCUUGAGGUGCAGGUGCAGGUGCAGGUGAAUGCCAUGUUGGU
pyr-1677	UCUGCAUUUGCACCUGCACCU	gra-MIR530a	-62.80	1.08	DangsuA	GUAGCUUUUAUCUGCAUUUGCACCUGCACCUUAUUGUUUGUUUCAGCUAUGUCAGAAAAACAAAACACUGUAAGAUAUGUUUUGUGUGGUGUGGUUGGAGACCAAACAAAGAGGUGCAGAUGCAGUUGCAGGUGAAUGCCAU
pyr-1677	UCUGCAUUUGCACCUGCACCU	gra-MIR530b	-50.10	0.85	DangsuA	GCAGCCUUUAUCUGCAUUUGCACCUGCACCUUCUUGUUUUUAAUUAUCUGCUUCUGCUUCAGAAACCAAAUGUGUUGAUGAAAAUAGAAUAGGACCGAAACAGAAAAUAAUAAUAAGGUGCAGGUGCAGGCGCAGCUGAAUGCCAU
pyr-884	GGUUUGUUGUCUGGCUCGAGG	osa-MIR166k	-67.50	0.95	DangsuA	AUUAGGUUAAGGGGUUUGUUGUCUGGCUCGAGGCAUCCGGGACUCCGGUUUCUCCUUUCCUACUGGAGGCGCCUAAUUUCCGGCGAGCUCGGAGCCUCGGACCAGGCUUCAAUCCCUUUAACCAUGC
pyr-883	GAAAUGGGUGGAUGGGAGUGA	hbr-MIR2118	-77.30	1.09	DangsuA	CUGAUAUGGAAUGGGAGAAUGAGCCUCCCAGAGGCGAGUGGAAAUGGGUGGAUGGGAGUGAACUUAAACCAGUCUGUGAUUGAGGUCGUUCCCAUGCCACCCAUUUCUAUUGUUUCUGGGGGUUUCUCCCUUUCCCAUCG
pyr-4684	AUAAAACCUUCAGCUAUCCAUC	tae-MIR7757	-93.00	0.84	DangsuB	UGCAUUACAUAUAAAACCUUCAGCUAUCCAUCUCCAUAUCAGCCUGUCUCUCUUAAUUUUGAAACAUUUUGGAAAUAUGCUUAAAUAUCCUUGAACAUAAGAACGAGCCACACAUGCUGCACCAAUACUAUGAAAAGUAGCAUAGAAUGAGUAAAAGAGGCUCUUGACUUUUAGAUCAUGCAAGAGCUUUGAUCUACAGGUAAACCCUUUUUUACUAACUACUAGCAGCUUUAAUCUGCCUUCUUAUCUAUAUGAUUAGUUAUUAUGUCUAAGUAUGUUUUUAGAAGAUUAAGCAAGCUCAUUCGAUAUGUAAAUGGAUAGUUUGAGGUUUUAUUUAUAAUGAU
pyr-2766	GCUUACUCUCUAUCUGUCACC	sly-MIR156e	-60.10	1.47	DangsuA	UGGUGGUGAUAGAAGAGAGUGAGCACACAUGGUGUUUUCUUGCAUGAUGUUUAUAUAUAUAUAUGCUUGAAACUAUGUGUGCUUACUCUCUAUCUGUCACCCCCA
pyr-2766	GCUUACUCUCUAUCUGUCACC	mes-MIR156g	-50.80	1.18	DangsuA	GGUGACAGAAGAGAGUGAGCACACAUGGCAUUUUCCUGCAUGACUUUACAUGCUCGAAGCUCUGCGUGCUUACUCUCUAUCUGUCACC
pyr-2766	GCUUACUCUCUAUCUGUCACC	gma-MIR156y	-47.60	1.08	DangsuA	UAAGGGAGGUGACAGAAGAGAGUGAGCACACAUAGUACUUUCUUGAAUGAUAUAAGGUUUCAUGCUUGAAGUUAUGCGUGCUUACUCUCUAUCUGUCACCCAUCAC
pyr-2766	GCUUACUCUCUAUCUGUCACC	cme-MIR156a	-61.40	1.33	DangsuA	AAGGGGAGGUGACAGAAGAGAGUGAGCACAUAAGGUAACUUUCUUGCAUGUUAGGGUUCAUGCUUGAAGCUUUAUGUGCUUACUCUCUAUCUGUCACCCACCAAAA
pyr-2766	GCUUACUCUCUAUCUGUCACC	ppe-MIR156d	-58.40	1.12	DangsuA	GGGUAAUGGAGGUGACAGAAGAGAGUGAGCACACAAGGUGUUUUCUUGCAUGGUGGGUUUCAUGCUUGAAGCUUUGCGUGCUUACUCUCUAUCUGUCACCCACUUUUCUC
pyr-2766	GCUUACUCUCUAUCUGUCACC	mtr-MIR156c	-53.50	1.19	DangsuA	GGUGGUGACAGAAGAGAGUGAGCACACAUGGUGUUUUCUUGCACGAUUAUGUUUCCUGCUUGAAGCUAUAUGUGCUUACUCUCUAUCUGUCACCCCAC
pyr-2766	GCUUACUCUCUAUCUGUCACC	rco-MIR156c	-56.00	1.14	DangsuA	GGAGGUGACAGAAGAGAGUGAGCACACAUGGUACUUUCCUGCAUGAAUUCAUGCUCGAAGCCUUGCGUGCUUACUCUCUAUCUGUCACCCCGCC
pyr-2766	GCUUACUCUCUAUCUGUCACC	stu-MIR156g	-49.10	1.40	DangsuA	UGACAGAAGAGAGUGAGCACACAUGGUGUUUUCUUGCAUGAUGUUUAUAUGCUUGAAACUAUGUGUGCUUACUCUCUAUCUGUCACC
pyr-2766	GCUUACUCUCUAUCUGUCACC	mdm-MIR156o	-50.70	1.13	DangsuA	GACGGUGACAGAAGAGAGUGAGCACACAUGGUAUUUUCUUGCAUGCUGGGUUCAUGCUUGAAGCUUUGCGUGCUUACUCUCUAUCUGUCACCAUC
pyr-657	UGAUUGAGCCGCGCCAAUAUC	bna-MIR171f	-40.30	0.77	DangsuB	ACGAAAGAGUCCUCUUUGAUAUUGGCCUGGUUCACUCAGAUCUUCCAGAUUACACACGUACUAUAUACAUUCUCUCAGUUAUCUGAUUGAGCCGCGCCAAUAUCUCAGUGCUCUCUCGU
pyr-657	UGAUUGAGCCGCGCCAAUAUC	bna-MIR171g	-30.10	0.89	DangsuB	GAUAUUGGCCUGGUUCACUCAGAUUACACACGUACUAUAUGCAUUCUCUUAGUUAUCUGAUUGAGCCGCGCCAAUAUCUC
pyr-657	UGAUUGAGCCGCGCCAAUAUC	bra-MIR171e	-40.30	0.77	DangsuB	ACGAAAGAGUCCUCUUUGAUAUUGGCCUGGUUCACUCAGAUCUUCCAGAUUACACACGUACUAUAUACAUUCUCUCAGUUAUCUGAUUGAGCCGCGCCAAUAUCUCAGUGCUCUCUCGU
pyr-657	UGAUUGAGCCGCGCCAAUAUC	atr-MIR171a	-64.70	0.98	DangsuB	AGAGGGUCUUUUGGAUACAUUGAAGGAGUUAUUUGCGAUGUUGGACCGGUUCAAUCAGAAAACACUGCCCAGAAAUUGCUGGGUCGUGUGCUUUGAUUGAGCCGCGCCAAUAUCCCAGAGCUUCUCAUCUUGUCUUUUCUAUCUCU
pyr-657	UGAUUGAGCCGCGCCAAUAUC	atr-MIR171c	-52.70	1.03	DangsuB	AUUGAAGGAGUUCUUGCGACAUUGGCCCGGUUCGAUCAGAGAUGAAAAUGCCAAGGAAAGAAAUGGAUGUUUGGUUUACUCUGAUUGAGCCGCGCCAAUAUCAAAGAGCUUCUCAAU
pyr-657	UGAUUGAGCCGCGCCAAUAUC	sbi-MIR171g	-34.60	1.12	DangsuB	UAUUGGUGAGGUUCAAUCCGAUGAUAGGUUUUACAAACAGCUGUAAAAUCAGUAUCUGAUUGAGCCGCGCCAAUAUC
pyr-657	UGAUUGAGCCGCGCCAAUAUC	bdi-MIR171a	-49.10	0.62	DangsuB	GAGGUAGGAGGCGGAGCGGAGGAAAGGCUUCCCGACCGGGGGAAGCUGGUGAUUGAGCCGCGCCAAUAUCUCUCGCGCGCCAGUGGAAUUGCCGGCUUCAGCUGCUUUCGCCGCCGCAGC
pyr-657	UGAUUGAGCCGCGCCAAUAUC	mdm-MIR171e	-59.80	0.88	DangsuB	UGAAAUAGUUACUGUGAUGUUGGCCCGGUUUCACUCAGAGAGGAAGACUGCUUACUGCUGCAUCUGCAUGUACGUAGGAACGUACGUUGUGGUUGGUCUCCUGAAUCUGAUUGAGCCGCGCCAAUAUCUCAGUGCUCUUUCA
pyr-657	UGAUUGAGCCGCGCCAAUAUC	mdm-MIR171d	-36.40	0.67	DangsuB	GAUGUUGGCUCGAUUUCACUCAGAGAAGAAGACUGCUUACUGCUUACUGCUGCAUCUGCAUGUACGUAGGAACAUAUGUUAUGGUUGGUCUCAUGAAUCUGAUUGAGCCGCGCCAAUAUC
pyr-657	UGAUUGAGCCGCGCCAAUAUC	mdm-MIR171c	-52.40	0.94	DangsuB	UACUGUGAUGUUGGCCCGGUUCACUCAGAGAAGAAGACUACUUACUGCAUUUGCAUGUACGUAGAUACGUACGUUGUUCUAUGGUCACCUGAAUCUGAUUGAGCCGCGCCAAUAUCUCAGUG
pyr-657	UGAUUGAGCCGCGCCAAUAUC	aly-MIR171a	-53.30	0.66	DangsuB	UCGUUUUUUAUAUUGUUUUCCUUUGAUCUAUCACUUAAGCACGAGAGAGUCCCUUUGAUAUUGGCCUGGUUCACUCAGAUCUUCCCUGACCACACUCACGUCGUACAUAUGCAUUCUCUCUAGAUUAUCUGAUUGAGCCGCGCCAAUAUCUCAGUACUCUCUCGUCUCUAUUUUGGACUUUGUGAUCUUGUAAAUCGA
pyr-657	UGAUUGAGCCGCGCCAAUAUC	osa-MIR171a	-45.40	1.08	DangsuB	GGAAAGAGCGAUAUUGGUGAGGUUCAAUCCGAUGAUUGGUUUUACAGCAGUGGUAAAAUCAGUAUCUGAUUGAGCCGCGCCAAUAUCUCUUCCUCU
pyr-657	UGAUUGAGCCGCGCCAAUAUC	tcc-MIR171a	-38.20	0.78	DangsuB	UUAGGCACCUACCUACACUAGGUAUUGACACGGUUCAACCUCACCGUAAUGUCAAUGAACUAACUCGACUUUAUGGUUUGAUUGAGCCGCGCCAAUAUCUUGUGCUUUUUACCUUAAUU
pyr-657	UGAUUGAGCCGCGCCAAUAUC	ath-MIR171a	-45.00	0.85	DangsuB	AUGAGAGAGUCCCUUUGAUAUUGGCCUGGUUCACUCAGAUCUUACCUGACCACACACGUAGAUAUACAUUAUUCUCUCUAGAUUAUCUGAUUGAGCCGCGCCAAUAUCUCAGUACUCUCUCGU
pyr-657	UGAUUGAGCCGCGCCAAUAUC	zma-MIR171a	-41.10	1.08	DangsuB	GAUAUUGGCGAGGUUCAAUCAGAUGAUGUAUUUUUCUUAUAUAUAAAUUUGCAUGCAUGAAGGUGUGAAUCCAGUGUCUGAUUGAGCCGCGCCAAUAUC
pyr-657	UGAUUGAGCCGCGCCAAUAUC	zma-MIR171n	-36.70	1.22	DangsuB	AUAUUGGUGAGGUUCAAUCCGAUGUUAGGUUUUACAAAAGCUGUAAAAUCAGUAUCUGAUUGAGCCGCGCCAAUAUCU
pyr-657	UGAUUGAGCCGCGCCAAUAUC	cme-MIR171e	-38.70	0.88	DangsuB	CUAUGAUAUUGGUCCGGUUCACUCAGAUCACUACCCUAAAUUGACUAGGGUUUCAUUUGAAGUUUAAAUUGAGUCUGAUUGAGCCGCGCCAAUAUCUCAGUGCUCU
