# Supplementary material for: The Effect of Different Pollination on the Expression of Dangshan Su Pear MicroRNA
Source: Biomed Res Int. 2017 Apr 10;2017:2794040. doi: 10.1155/2017/2794040 (PMC5402243; doi:10.1155/2017/2794040)
Supplement: Supplementary file 1 — These Supplementary Materials contained the detailed data of the primer sequences used in this study, those known and novel microRNAs, differentially expressed microRNAs, the target genes of the differentially expressed microRNAs and which corresponding GO function enrichment analysis and KEGG pathway analysis in “Dangshan su” Pear of different male parent pollination. [file 2794040.f1.zip › Supplementary Material/Supplementary Material3/quantifier_miRseq.novel.stat.xls]

## Novel micro RNAs prediction result
#novel mature id	mature sequence	other species' id in mirbase	novel precursor id	MFE(kcal/mol)	MFEI	coordinate	Sample:pvalue	precursor sequence
pyr-novel-miR-1-5p	cuaaugacauuauagaggaca	-	pyr-novel-mir-1	-104.60	2.09	Chr12:18817125..18817313:+	DangsuA:0.89,DangsuB:0.9	cuaaugacauuauagaggacacaccaauaucaacuuuauuuguucauuaauuaauaccaaagccauuaauacuuauaaagucaauacacuagaauuuucuuugaaagaaaauucuaguguaaugacuuuauaaguauuaaugaacaaauaaaguugauauugguguguccuagacaaugucauuagcu
pyr-novel-miR-2-5p	uugacagaagagagugagcac	pyr-69	pyr-novel-mir-2	-42.40	1.03	Chr15:5438997..5439082:+	DangsuA:0.89,DangsuB:0.9	uugacagaagagagugagcacacagaggcacuugccauaaagcguaugccauugcuuuugcgugcucaugucucuuucugucagc
pyr-novel-miR-3-3p	acuugaugaauuagaaggaagaga	-	pyr-novel-mir-3	-27.00	0.57	Chr12:16707418..16707576:+	DangsuA:0.89	cccuuucuccuaauccacaaaguucgaagaucuagaccauuaaaauuugaucuaacagcuauaaacaaagaucuauuuuaaaaguuauaauaacuuuaaccguuuaauuaaauuucaauagccaugaccucugaacuugaugaauuagaaggaagaga
pyr-novel-miR-4-5p	caucuccugagcuaauggagagga	-	pyr-novel-mir-4	-81.00	1.19	Chr9:7918864..7919025:-	DangsuA:0.89,DangsuB:0.9	caucuccugagcuaauggagaggauccucuguuggauuuucauccaaugacuacaaacagagaggucccuuuaaaguuauaauaauuguagcuguuggauaaaaauccaacgguccacgaugauggguuaggaggauccucuccauuagcuuaggagagga
pyr-novel-miR-5-3p	aucccuaggauuuggugggagaga	-	pyr-novel-mir-5	-110.50	1.65	Chr3:3273687..3273845:+	DangsuA:0.89	cucucccaccaagucauagggauucagagauucggacccuugaaauuugauccaaugacuacaauuauuauaacuuuuagagggaccuucuguuuguagucguuggaucaaauuucaagggccugaaucucuggaucccuaggauuuggugggagaga
pyr-novel-miR-6-3p	uugcguuccacugauucuuucg	-	pyr-novel-mir-6	-44.80	0.80	Chr1:5945586..5945695:+	DangsuA:0	aaaguaucacggagcgcaaagagaagcagaaagaucgccgccgcuuuucacccgaaucguaggccuuuggcgucucugcucguaucuuugcguuccacugauucuuucg
pyr-novel-miR-7-3p	cuaccgaugccacuaaguccca	pyr-4222	pyr-novel-mir-7	-30.90	0.86	Chr3:20699741..20699813:-	DangsuA:0.89,DangsuB:0.9	ggacuuaguugcucggugagaaaaccugaggaucuggaguucuucuucuccuaccgaugccacuaaguccca
pyr-novel-miR-8-5p	cagccaaggaugacuugccgg	pyr-47	pyr-novel-mir-8	-79.20	0.98	Chr9:21098114..21098328:+	DangsuA:0.89,DangsuB:0.9	cagccaaggaugacuugccggcaacaaugcucccauacaauauuuguauaucaacccuaaucuugcagaucuauauauguauauauguauaugugcauagcauauacauaugggauguaucauguauguugaugucaucucaugcguauaugcaugauagauaagauacaugaucuugugacaaugaguugaucggcaagucgucucuggcuac
pyr-novel-miR-9-5p	uggagaagcagggcacgugca	pyr-486	pyr-novel-mir-9	-48.40	0.93	Chr4:1650031..1650130:-	DangsuA:0.89,DangsuB:0.9	uggagaagcagggcacgugcaaauucuagcucaggcacuccuccaugggagcuuagcuuaagcuuuaacaaggcuuugcacgugcuccccuucuccaac
pyr-novel-miR-10-5p	caucuccugagcuaauggagagga	-	pyr-novel-mir-10	-88.10	1.30	Chr10:8189719..8189899:+	DangsuA:0.89	caucuccugagcuaauggagaggauucuucugaccuauuaucauagagcguuagauuuuuauucaaugacuauaauuauuauaacuuuaaagggauugcucuguuuguagccguuggauaaaaauucaacggccuacgaugaugggucaagaggauucucaccauuaguucaggagagga
pyr-novel-miR-11-5p	ugaagcugccagcaugaucuua	pyr-891	pyr-novel-mir-11	-32.60	1.05	Chr16:7380253..7380324:-	DangsuA:0.89,DangsuB:0.9	ugaagcugccagcaugaucuuauaacuccuuacuucguuuagggaagaucagaucaucuggcaguuucacc
pyr-novel-miR-12-5p	uugacagaagagagugagcac	pyr-69	pyr-novel-mir-12	-37.10	0.86	Chr15:11740904..11740991:-	DangsuA:0.89,DangsuB:0.9	uugacagaagagagugagcacacacaggcagcaauuguauaaaaucauaccuuugggcggugcgugcucacuucucucuccgucagc
pyr-novel-miR-13-3p	gagccaaggaugaauugccgg	pyr-47	pyr-novel-mir-13	-37.10	0.62	scaffold980.0:132559..132718:+	DangsuA:0	agaauauguucauuuuucuccucaaucucuucuucaacuuucuguauauauagcuuaugcauaucccaccauuguaaugcgagcagaaacaaaugaaaauaauagcaagcauugccuggaaaagaagagagugcaauggagccaaggaugaauugccgg
pyr-novel-miR-14-3p	cagucugacaauauaacgugc	-	pyr-novel-mir-14	-53.30	1.84	Chr15:11924713..11924805:-	DangsuA:0	uguuauauugucagauugucaaucugaacccuuaauuaccauuaauuuacguaauuaaugguucagauugacagucugacaauauaacgugc
pyr-novel-miR-15-5p	gagccaaggaugaauugccgg	pyr-47	pyr-novel-mir-15	-39.20	0.91	scaffold980.0:9264..9372:-	DangsuA:0	gagccaaggaugaauugccggcgcuauagauaauuaaguucauaaauguguauacaugccaccaaaauccguauauauuugcuugccggcaauuuguucuuggcuaug
pyr-novel-miR-16-3p	uugagccgcgccaauaucacu	pyr-1477	pyr-novel-mir-16	-37.00	0.88	Chr2:21727088..21727175:-	DangsuA:0.89,DangsuB:0.9	cgauguuggugagguucaauccgaagacagauuuacacauccccgcuggcguaaauugaucucagauugagccgcgccaauaucacu
pyr-novel-miR-17-3p	cugaaguguuugggggaacuc	pyr-89	pyr-novel-mir-17	-30.50	1.02	Chr13:3065124..3065198:+	DangsuA:0.87,DangsuB:0.85	guucccuugaccacuucauugggaaauaguuucuuuggcaauuauauauccuacugaaguguuugggggaacuc
pyr-novel-miR-18-3p	ugaacuuauugcaacuagcuu	pyr-4693	pyr-novel-mir-18	-107.80	0.71	Chr5:21523932..21524226:-	DangsuA:0	gcugguggcaaagguaucgaucaucaucgucccaaucgccgaaagcauggcgaugaagccgguaaaggggaaguucccccacgggguuucgcugaggcaagggcuugucaagcucucaaaagcguccggcagcacguggaugaaaccuguugcuagaaucacaccggcagcaaaggccuugaucaugaagaagaugucauuuucgggguuuagggccggaauuuucuugcccaacauugggagggagacaccaaggaaacuugcuaugaggauugaacuuauugcaacuagcuu
pyr-novel-miR-19-5p	uagccagggaugacuugccu	pyr-691	pyr-novel-mir-19	-41.00	0.87	Chr15:13361579..13361695:-	DangsuA:0.89,DangsuB:0.9	uagccagggaugacuugccuaauuagaucucauaugugcacaaguuacuaacaaguuagcgcuugagccuauauguauuaggauuucuagauaagcaaguuguccuucggcuuguc
pyr-novel-miR-20-3p	ucggaccaggcuucauucccc	pyr-195	pyr-novel-mir-20	-33.90	0.89	Chr13:6494344..6494425:+	DangsuA:0.89,DangsuB:0.9	ggaaugcugucugguucgagaccauuccuuugaagcaaagaacaugaacaucgaaugauuucggaccaggcuucauucccc
pyr-novel-miR-21-5p	ugaagcugccagcaugaucua	pyr-891	pyr-novel-mir-21	-32.40	1.01	Chr3:2461233..2461302:-	DangsuA:0.89,DangsuB:0.9	ugaagcugccagcaugaucuaaacuucccucuuggucaaggaaagaucagaucaugugguagcuucacc
pyr-novel-miR-22-3p	uuggaccaggcuucauucccc	pyr-4231	pyr-novel-mir-22	-24.80	0.86	Chr7:14415426..14415488:+	DangsuA:0.89,DangsuB:0.9	ggaauguugucagguacaagacuaccuaagucgguaauuucuuggaccaggcuucauucccc
pyr-novel-miR-23-5p	accaaaacuggcuuuaugugugug	-	pyr-novel-mir-23	-41.80	1.55	scaffold202.0.1:580212..580277:+	DangsuA:0.9,DangsuB:0.9	accaaaacuggcuuuauguguguguugcauaaagccagucacacacauaaagccaguuuugguga
pyr-novel-miR-24-5p	cauugagugcagcguugauga	pyr-2229	pyr-novel-mir-24	-41.60	1.16	Chr10:4718860..4718947:-	DangsuA:0.89	cauugagugcagcguugaugaaaguucguauuccuucugaaucuucauuagggcaucgaaacauuucaucaacgcugcacccaauua
pyr-novel-miR-25-3p	uagccagggaugacuugccu	pyr-691	pyr-novel-mir-25	-25.70	0.47	Chr15:13361675..13361811:-	DangsuA:0.87,DangsuB:0.85	gcagccuccgauguguuaccuauaaauagaagcuuaguuuaacaauagagaacauaggcaacaaauuaaauucagaggaagagaagucuuguaugaaggugaagagccauguuugguagccagggaugacuugccu
pyr-novel-miR-26-3p	ucggaccaggcuucauucccc	pyr-195	pyr-novel-mir-26	-58.70	0.93	Chr6:11151778..11151932:+	DangsuA:0.89,DangsuB:0.9	ggaauguugucuggcucgaggccucuuaacuagaucuaugaucuucaucucaauuggugacaauuuuauccaccaaucuuaaaaaaauuacagucccaguugagaaagaucauugauucuacguuuagugacgucggaccaggcuucauucccc
pyr-novel-miR-27-3p	uuuggauugaagggagcucua	pyr-53	pyr-novel-mir-27	-84.80	0.91	Chr6:3297526..3297717:-	DangsuA:0.89,DangsuB:0.9	gagcuccuugaaguccaaaagaaggugaugcuggguggauagagcugcugagcuauggaucccacaguacuauauauccaauguuagaucggaccggaucggaucgaagggaugacaggccuguggcuugcauaucucaggagcugcauuacccguaagcuaccucuuuuuuuggauugaagggagcucua
pyr-novel-miR-28-3p	ucgauaaaccucugcauccag	pyr-1621	pyr-novel-mir-28	-38.90	1.05	Chr14:14834479..14834566:+	DangsuA:0	uggaggcagcgguucaucgaucuguuuaugagauuuguugugaaaaaaacacagaacaugaaugggucgauaaaccucugcauccag
pyr-novel-miR-29-3p	cguguucucaggucgccccug	pyr-2115	pyr-novel-mir-29	-34.70	0.69	Chr11:11863245..11863335:+	DangsuA:0.89,DangsuB:0.9	gggguaaccugagaucacauacaugcaggaucuccagaaccccaagccacugguguucaucgccuucaacguguucucaggucgccccug
pyr-novel-miR-30-3p	gcucucuuuucuucugucauc	-	pyr-novel-mir-30	-46.70	1.11	scaffold1045.0:15407..15494:-	DangsuA:0.87	uugacagaagagagagagcacaacccgccaucggcuaaagagagucuuuuccguuguugggagugugcucucuuuucuucugucauc
pyr-novel-miR-31-3p	ucggaccaggcuucauucccc	pyr-195	pyr-novel-mir-31	-59.60	0.90	Chr1:4370761..4370927:+	DangsuA:0.89,DangsuB:0.9	ggaauguugucuggcucgaggacucuuuucauauugaucuauaauccccuagaucaacaaccuauauauauauauaucuguauguguauguauauguugcguuuaccaacugcauacacagagaugaucaggugaauuagugucgucggaccaggcuucauucccc
pyr-novel-miR-32-3p	aggugcaggugccagugcagg	pyr-4436	pyr-novel-mir-32	-64.20	0.76	Chr3:14550011..14550209:+	DangsuA:0.89,DangsuB:0.9	ugcauuugcaccugcacuugugcucguucauguuucuuccuuccuugaaaaacccuaaaaccaaagcuucagagaauggaaaggguuuuagauauaugagagcaaaaaagacaagaggaaaggaauaagggaaaagaaggaaaauggaaaucagaaggaagaggaggaacaagcaagaggugcaggugccagugcagg
pyr-novel-miR-33-5p	ccucuccugagcuaauggagagga	-	pyr-novel-mir-33	-99.90	1.39	Chr12:4763276..4763456:-	DangsuA:0	ccucuccugagcuaauggagaggauccucuugaccaaucaucauggaccguuggauuuuuauccaacgguuacaaucauuauaacuuuaaaaggacccuucuguuuguaguuguuggauaaaaauccaacggccuacaaugauugaucaugaagaucuucuccauuagcucaagagagga
pyr-novel-miR-34-3p	ugccaaaggagauuugcucgg	pyr-51	pyr-novel-mir-34	-49.90	0.98	Chr5:24821285..24821406:+	DangsuA:0.87,DangsuB:0.9	gagcaaagucuccucuggcauguagccacuuacaauuacaaaugcuuaauucuggcugaacaaacuggccagccuugcauuauuuuuguaguuugcuuuaugccaaaggagauuugcucgg
pyr-novel-miR-35-3p	cuaauuucaucaugguaucagagc	-	pyr-novel-mir-35	-64.90	0.89	Chr12:19509458..19509642:+	DangsuA:0.89	cugauaccaugauaaaauugauguuccaccauaaaaaaguugucccacaucggugaggaacaagguugaguugucccacaucggugaagaacaagguuuguuaugugcuuauauggucuuggcuacuccucauauugccaauuaguuuuaugguggaauccuaauuucaucaugguaucagagc
pyr-novel-miR-36-3p	ucgauaaaccucugcauccag	pyr-1621	pyr-novel-mir-36	-35.60	0.94	Chr6:4151972..4152059:+	DangsuA:0	uggaggcagcgguucaucgaucuguuuaugagauuuuguugugaguaaacacaguacaugaaucggucgauaaaccucugcauccag
pyr-novel-miR-37-5p	ugaagcugccagcaugaucua	pyr-891	pyr-novel-mir-37	-34.70	1.16	Chr12:2095526..2095596:-	DangsuA:0.89,DangsuB:0.9	ugaagcugccagcaugaucuaagcuaucuuuguauacaggaaaggcuauagaucaugugguagcuucacc
pyr-novel-miR-38-5p	ucggaccaggcuucauucccc	pyr-195	pyr-novel-mir-38	-62.40	0.57	Chr13:6494404..6494672:+	DangsuA:0.87,DangsuB:0.85	ucggaccaggcuucauuccccccaacacaaaaugcaguacguuccuacucauggcaauugaucaguuagauacacccuuuuaugcaucgcugaucaauguaugaauucugagcauuucgacgaucuagcugcuuguuccauaucaucgaucauguaagcauacagcauaucauucucauuaauuaucguucuaugcauauuuucuccauucauugauuugcagccauaagugagaacacuguacuagaagaagaagaccggucugggc
pyr-novel-miR-39-5p	ucccucaagggcuuccaacauu	pyr-4614	pyr-novel-mir-39	-41.30	0.96	Chr17:2139864..2139955:-	DangsuA:0.89,DangsuB:0.9	ucccucaagggcuuccaacauuccauauauaucaguacuaugaucgaucgacgucgaguacguaugggaauguugguugccggagggaacu
pyr-novel-miR-40-3p	agucuggugguuacuuuggugc	-	pyr-novel-mir-40	-87.30	1.15	Chr5:26155782..26155975:-	DangsuA:0.89	ccaaagucaccacccgacuguuaucguauucaauucauccuccaacaaguccgugaucucuaugcgcaaucucuuaauuuaugauaaaaucaacaaagaaaugcuaugaaaagaaaguaguuugcggauagagauaacgaacuugucguaggaugagcugaagaugauaacagucuggugguuacuuuggugc
pyr-novel-miR-41-5p	uggagaagcagggcacgugca	pyr-486	pyr-novel-mir-41	-56.70	0.90	scaffold235.0:313040..313199:+	DangsuA:0.89,DangsuB:0.9	uggagaagcagggcacgugcauuucuaacucauucgaucgcguauacugagauauauauguacugcuuuuuauuuagcagcugggaauuuauuacaaguuuauauguguguuucauauccagugaugaguuaguuguucaugugccccucuuccccauc
pyr-novel-miR-42-3p	ugacgacgagagagagcacgc	pyr-4809	pyr-novel-mir-42	-22.90	0.64	scaffold651.0:47890..47965:-	DangsuA:0.87,DangsuB:0.85	cugcuuuuuuucauugcuacugacgucugaguugagcuaggguuugauguugugugacgacgagagagagcacgc
pyr-novel-miR-43-5p	uggagaagcagggcacgugca	pyr-486	pyr-novel-mir-43	-34.60	0.84	Chr11:32443..32529:+	DangsuA:0.87,DangsuB:0.85	uggagaagcagggcacgugcaaguccauuaccuacgcuuucaaaugcuuauggauaaguccuuugcaugugcucccuuucuccaac
pyr-novel-miR-44-3p	gaagaccuuggggagagugga	-	pyr-novel-mir-44	-35.10	0.95	Chr6:5316172..5316237:-	DangsuA:0.89	acucucccucaagggcuucgaccaaugucagacauggcgagcucgaagaccuuggggagagugga
pyr-novel-miR-45-5p	ggagcaucaucaagauucaca	pyr-2481	pyr-novel-mir-45	-34.90	1.13	Chr7:11188034..11188117:+	DangsuA:0.89,DangsuB:0.9	ggagcaucaucaagauucacaaucuuacuuggguucuaauuuuaaccccauuugaugauaugagaaucuugaugaugcugcag
pyr-novel-miR-46-3p	cugaaguguuugggggaacuc	pyr-89	pyr-novel-mir-46	-30.50	1.05	Chr13:3065347..3065421:+	DangsuA:0.87,DangsuB:0.85	guucccuugaccacuucauugggaaauagucuuuuuuguaacuauauauccuacugaaguguuugggggaacuc
pyr-novel-miR-47-3p	gcucucuaugcuucugucauc	pyr-3566	pyr-novel-mir-47	-46.80	1.30	Chr6:3417270..3417354:-	DangsuA:0.89,DangsuB:0.9	uugacagaagauagagagcacagauggaugacuugcaauugacuaugcaucucacuccuuugugcucucuaugcuucugucauc
pyr-novel-miR-48-5p	uccaaagggaucgcauugaucc	pyr-2351	pyr-novel-mir-48	-33.00	1.06	Chr17:21531102..21531178:+	DangsuA:0.89,DangsuB:0.9	uccaaagggaucgcauugaucccagcuagcuauuucuuuacaucauuugguuuggaucaugcuaucccuuuggauu
pyr-novel-miR-49-3p	cugccaaaggagaucugcucag	-	pyr-novel-mir-49	-43.80	0.80	Chr5:24826016..24826136:+	DangsuA:0	gagcagucuccucuuggcaaacugccuauaucuucuacauacgaaauugaauacaugcacaugguggucuggccacaugaucuaaugagaaaggcugucugccaaaggagaucugcucag
pyr-novel-miR-50-5p	ugaagcugccagcaugaucuua	pyr-891	pyr-novel-mir-50	-32.60	1.09	Chr16:8116110..8116181:+	DangsuA:0.89,DangsuB:0.9	ugaagcugccagcaugaucuuauaacuccuuacuuuguuuagggaagaucagaucaucuggcaguuucacc
pyr-novel-miR-51-3p	uuagauucacgcacaaacucg	pyr-2690	pyr-novel-mir-51	-32.80	0.89	Chr13:8782010..8782093:+	DangsuA:0.89,DangsuB:0.9	aguuugugcgugaaucgaaccccuuuuagccguccaucuguuugauagauaauccaacgguguuagauucacgcacaaacucg
pyr-novel-miR-52-5p	uccaaagggaucgcauugaucu	pyr-2351	pyr-novel-mir-52	-44.50	0.95	Chr7:14139788..14139903:-	DangsuA:0.89,DangsuB:0.9	uccaaagggaucgcauugaucuaauugaucauauaugucaaacaucguccguacagacauggcggguuauguuuucgucuauauacauaguuggaucaugcaaucccuuuggacg
pyr-novel-miR-53-5p	auugagugcagcguugaugaa	pyr-494	pyr-novel-mir-53	-42.20	1.11	Chr5:26610944..26611028:-	DangsuA:0	auugagugcagcguugaugaaaguccguauuccuuacgaaucuucauuaggcaucggaaacuuucgucagcgcugcacccaauu
pyr-novel-miR-54-3p	cgcuauccauccugaguuuca	pyr-649	pyr-novel-mir-54	-47.10	1.15	Chr3:22495862..22495958:+	DangsuA:0.89,DangsuB:0.9	aagcucaggagggauagcgccagaugaauuaaccaagauucuaagcaauuaagcguuuauuucgucaucaucuggcgcuauccauccugaguuuca
pyr-novel-miR-55-3p	ucggaccaggcuucauucccc	pyr-195	pyr-novel-mir-55	-52.90	0.84	Chr14:19318615..19318768:-	DangsuA:0.89,DangsuB:0.9	ggaauguugucuggcucgaggccucuaguuagaucuaugaucuccaucucaauuggugacaauuuuaaccaccaaucuuaaaaauuuuacaguaccaguugagaaagaugauuguuucuauguuuagcgaccucggaccaggcuucauucccc
pyr-novel-miR-56-5p	acacgcauuuagacuaaucuuggc	-	pyr-novel-mir-56	-77.70	1.44	Chr5:28175280..28175458:-	DangsuA:0	acacgcauuuagacuaaucuuggccauucaauucaucaaaugaacugaaugaguucacgucauauuauucucuuauucagcaugauaaggugcaaacauguauuauguuauaauauagcgugaacucauucaguuaauuugauuauuucaauuaccaaaauuagucuaaaugcgugua
pyr-novel-miR-57-3p	ccucuccuugggcucagaagagga	-	pyr-novel-mir-57	-92.30	1.00	Chr3:15889766..15889991:+	DangsuA:0.89	ccucuucucagcccaaagagaggaucuuccugaucaaaugacuuggaccguugaaugaaaaucuaacggcuacaaacaugggucucuuuaaaguuauaauaauuauccaacggcccaaguccuuuggucucccuuuaaaguuauaauaauuauagccguuugaugaaaauccaacagcuaaaguccuuuggucaagaggauccucuccuugggcucagaagagga
pyr-novel-miR-58-3p	gagaguguaugagaagugggaggg	-	pyr-novel-mir-58	-87.50	1.35	Chr2:4374447..4374631:+	DangsuA:0	cccacuucccauacacucucgucaccuccuauuugugugauaaugguuaagucacgucaacauuuuauauuacuauuacuuuuugucuuauuaucucuauaaaaaauuaauauaaaauauugauguggcuuaaccgugaccgcacaaaauagaagggaaugagaguguaugagaagugggaggg
pyr-novel-miR-59-3p	gaagaccuuggggagagugga	-	pyr-novel-mir-59	-38.60	1.02	Chr6:5316172..5316238:-	DangsuA:0	cacucucccucaagggcuucgaccaaugucagacauggcgagcucgaagaccuuggggagagugga
pyr-novel-miR-60-3p	uuggacugaagggagcuccu	pyr-30	pyr-novel-mir-60	-74.20	0.87	Chr7:12251329..12251519:-	DangsuA:0.89,DangsuB:0.9	gagcuuucuucaguccacucauggauagaaauugaaaggguuguugaaguagcugccgacucauucacucaagcacucaguagagauuaaaggaguguaaacgcagacaauuugcuacugugauugugugaaugaagcgggagauauuuuacaucccucuugcucugcgcuuggacugaagggagcuccu
pyr-novel-miR-61-3p	ugacuggcucuuaucuuucaug	-	pyr-novel-mir-61	-67.00	1.00	Chr14:12896481..12896642:-	DangsuA:0.89,DangsuB:0.9	ugaaggugaagagccguguuugguagccaaggaugacuugccuaauuagauaucauauauuccccaaguuacuaacagauuaguacuugggcacauauauauuaggguuuccagcuaggcaguuguccuucggcuaaucugacuggcucuuaucuuucaug
pyr-novel-miR-62-3p	caugugcucuagcucuccauc	pyr-2467	pyr-novel-mir-62	-34.60	1.05	Chr9:10184480..10184551:+	DangsuA:0.89,DangsuB:0.9	uggagaagcagggcacaugcuagauauaucagcauugucugagaauuucgcaugugcucuagcucuccauc
pyr-novel-miR-63-3p	ucggaccaggcuucauucccc	pyr-195	pyr-novel-mir-63	-65.80	0.97	Chr1:1972798..1972972:-	DangsuA:0.89,DangsuB:0.9	ggaauguugucuggcucgaggacacuuuccuugaucuauaaucucuggaucaacaaccguuauauaccuauacauauaucuauauauguguauguguuuguauauguuguguguaucaucugcauacauagaugaucagguuaaguagugucgucggaccaggcuucauucccc
pyr-novel-miR-64-3p	aggugcaggugcaagugcagg	pyr-4436	pyr-novel-mir-64	-63.80	0.78	Chr11:29914179..29914380:-	DangsuA:0.89,DangsuB:0.9	ugcauuugcaccugcacuuguacuaguucuuguuucuuacuuccuugaaaaacccugaaaccaagcuucaaagcauggcaaagguuuuagauguaugagaggaaaaaaaagaagaaaagaggaaaggaauaaaggaauaggaggaaaauggaagucagaaggaagaggagaacaagcaacaggugcaggugcaagugcagg
pyr-novel-miR-65-3p	ugccaaaggagaauugcccug	pyr-51	pyr-novel-mir-65	-41.80	1.04	Chr10:3398039..3398130:-	DangsuA:0.89,DangsuB:0.9	gugcaaaucuccuuuggcagaaaugauucuggugcauuuacucuugaguacuaccacuggauaugcuuucugccaaaggagaauugcccug
pyr-novel-miR-66-3p	ccucaaucccucuggaucuggaaa	-	pyr-novel-mir-66	-101.40	1.00	Chr15:28433339..28433588:+	DangsuA:0.9	uccauuucccaagggauugaggucaauuuagugggaaauugauuagaaaauguuuguuaggagggauuagaaaugccugauaugagcaugcguuuguauugccugguuugcaaaucccuacuugggaggagucauuuacaaauaucucucacaugcccuugcaaugcucauggagggcaucucuaaucccucauuauuuugcuguccauuucuuaauaacuuagaccucaaucccucuggaucuggaaa
pyr-novel-miR-67-3p	cgagccgaaccaauaucacuc	pyr-59	pyr-novel-mir-67	-36.20	0.74	Chr1:10040632..10040753:-	DangsuA:0.89,DangsuB:0.9	ugugauauugguucuggcucauaucucugauaacuagcuuaucuucgaucauaaaucgucacgauucacaacaaagacuaguacuacgcacucuuugagacgagccgaaccaauaucacuc
pyr-novel-miR-68-3p	accaaaacuggcuuuaugugugug	-	pyr-novel-mir-68	-67.30	1.12	scaffold202.0.1:580250..580387:-	DangsuA:0.9	cacacauaaagccaguuuuggugaacgugugaugcaggcagacaugugaggcacuuugaaugcucauguauguuuguacgagggacaacagaucuuugaugugacucauguucaccaaaacuggcuuuaugugugug
pyr-novel-miR-69-3p	ucggaccaggcuucauucccc	pyr-195	pyr-novel-mir-69	-58.90	0.91	Chr16:9886534..9886687:-	DangsuA:0.89,DangsuB:0.9	ggaauguugucuggcucgaggccucuagcuagaucuaugaucuccaucucaauuggugacaauuuuaaccaccaaucuuaaaaguuuuacaguaccaguugagaaagaucauugauucuauguuuagcgaccucggaccaggcuucauucccc
pyr-novel-miR-70-3p	aaugcuaugaugacauguggguga	-	pyr-novel-mir-70	-111.10	1.37	Chr2:9410648..9410912:-	DangsuA:0.89,DangsuB:0.9	acccacaugucaucaaagcaugucucuaauuaaaaaaauuaaaaauaaaaauaacccucguuuuucucucucuuucuuucuuucacauuucuugccaacuucuaucucuuccauauuauuaguuuuuucuuuuaaaaucuuuuuauauggaagagauaaguuggagagaaguuggaaagggagagugagagcccaugcggggaguuuuuuuauuuugauuuaaaaaaaaaaaaauugagaaaugcuaugaugacauguggguga
pyr-novel-miR-71-3p	ggaauguugucuggcucgagg	pyr-56	pyr-novel-mir-71	-47.00	0.45	Chr14:19318747..19318970:-	DangsuA:0.87,DangsuB:0.85	ucguaccacccauuucauuucucucacucaccacgaucacacaccacuucucccucccccucuuucuccuacccccuccucucugucucugucucuuucucugucucucucucucucucucguucauaguuaggguaaagcugcuuuugugaaauggaggcagaaagaucaaagaagaggaagcaaauuuguuuuuuugaggggaauguugucuggcucgagg
pyr-novel-miR-72-5p	uuccacagcuuucuugaacug	pyr-1821	pyr-novel-mir-72	-50.40	0.90	Chr2:21688908..21689027:+	DangsuA:0.89,DangsuB:0.9	uuccacagcuuucuugaacugcauccaucuauggcgagaucgaccgaucuuuggagugagucgacucagucucucuauuccccuuaacuugguuugcgguucaauaaagcugugggaag
pyr-novel-miR-73-3p	cauugagugcagcguugauga	pyr-2229	pyr-novel-mir-73	-21.10	0.64	Chr5:26611008..26611087:-	DangsuA:0.87	aucaaucaugcauuugaucaggaaguucagcacuggacgaaccagauugaagaaacaucauugagugcagcguugauga
pyr-novel-miR-74-3p	aguguagaaugagauuuuuggagu	-	pyr-novel-mir-74	-28.00	1.27	Chr17:4915973..4916060:-	DangsuA:0.89	ucaaaaaucucauuauacacuucuuacaaguguauauuuucuuuccaaauauaaaaauuuuggaguguagaaugagauuuuuggagu
pyr-novel-miR-75-3p	cgucccaccgagcgugcca	-	pyr-novel-mir-75	-37.80	0.54	Chr4:9661625..9661774:+	DangsuA:0	gacugagugaggagggauccugggugaucugugaugucugcuucugucaggcaaagagguugccugaauucuaccuuucaccugaauguucaauccuucauuugucuuggcauacaauauuacaagauaucgucccaccgagcgugcca
pyr-novel-miR-76-5p	cggucgugucaccaagagggc	-	pyr-novel-mir-76	-47.60	1.54	Chr17:4896801..4896858:+	DangsuA:0	cggucgugucaccaagagggcucauacaguaugagcccucuuggugauacgagcgaa
pyr-novel-miR-77-5p	uccaaagggaucgcauugaucu	pyr-2351	pyr-novel-mir-77	-44.60	0.89	Chr1:8497696..8497808:-	DangsuA:0.89,DangsuB:0.9	uccaaagggaucgcauugaucuaauugaucagauaugucaaacaucauccgcacagacguauggucgguuauguuuucgucuguguaguugaucaugcgaucccuucggacg
pyr-novel-miR-78-5p	ugaagcugccagcaugaucua	pyr-891	pyr-novel-mir-78	-39.90	0.91	Chr3:2466075..2466183:-	DangsuA:0.89,DangsuB:0.9	ugaagcugccagcaugaucuagcuuuggcuaaagauauauacaaucacacauauauguggguauuaguucuauuaacccuagcuaggucaugcucugacagccucacu
pyr-novel-miR-79-3p	ugccaaaggagaauugcccug	pyr-51	pyr-novel-mir-79	-49.20	1.12	Chr5:24834259..24834358:-	DangsuA:0.89,DangsuB:0.9	gugcaauucuccuuuggcagaagucauucuggugcauguacucuugaguacugucgcuggauacauauauaugcuuucugccaaaggagaauugcccug
pyr-novel-miR-80-5p	uuccacggcuuucuugaacug	pyr-379	pyr-novel-mir-80	-36.00	1.00	Chr15:10086637..10086734:-	DangsuA:0.87,DangsuB:0.9	uuccacggcuuucuugaacugugcaguuuccagaagaauuaaacuggcagaaauuuuucaugcagauacagaaacaguucaagaaagcugugaaaaa
pyr-novel-miR-81-3p	cuaccgaugccacuaaguccca	pyr-4222	pyr-novel-mir-81	-28.00	0.72	Chr13:1735575..1735650:-	DangsuA:0.89,DangsuB:0.9	ggacuuaguugcucggugagaaaaccugaugaucuggaguccuccaucuccuccuaccgaugccacuaaguccca
pyr-novel-miR-82-3p	accuagcucugauaccauaaa	pyr-1970	pyr-novel-mir-82	-33.10	1.23	Chr15:7533231..7533314:-	DangsuA:0.89,DangsuB:0.9	ugugguaucaggacuauguuauguuaauguuguuacacaauauuguguuacucauccauauaaccuagcucugauaccauaaa
pyr-novel-miR-83-3p	cgcuauccauccugaguuuca	pyr-649	pyr-novel-mir-83	-49.20	1.17	Chr11:26049720..26049812:+	DangsuA:0.89,DangsuB:0.9	aagcucaggagggauagcgccauaugaacaaagggucuaguuacuagguaggcguuucuuuguucaucaugcgcuauccauccugaguuuca
pyr-novel-miR-84-3p	cugaaguguuugggggaacuc	pyr-89	pyr-novel-mir-84	-38.40	0.87	Chr13:3068269..3068374:-	DangsuA:0.87	guucccuugaacacuucauugggaggugagauuaaucucccucucugauaugguuucgaacaauugucuucuuauguauuccuacugaaguguuugggggaacuc
pyr-novel-miR-85-5p	aggagaauuuuucaguaugccaga	-	pyr-novel-mir-85	-49.90	1.04	Chr10:7012620..7012768:-	DangsuA:0.86	aggagaauuuuucaguaugccagaaacauggcucaguacaccaaauguaaaaauacauugauuggaaauuuaaaaaaaaauaauuaaaccaauuguuuuauugcacuugguguaucgcgccguuuucccggcuuacugaaaaauuucu
pyr-novel-miR-86-5p	uagccgaggaugauuugccugc	-	pyr-novel-mir-86	-33.30	0.68	Chr3:2933544..2933657:+	DangsuA:0.89,DangsuB:0.9	uagccgaggaugauuugccugcagccucgauccuaaagaguaaagagguuuauuacacgauaaaaaucagaaaaacccuaguugaguucucagguagucacuccuuggcgacu
pyr-novel-miR-87-5p	uccucuuggugaucgcccugc	pyr-3100	pyr-novel-mir-87	-38.00	0.90	Chr2:21640639..21640717:+	DangsuA:0.87,DangsuB:0.9	uccucuuggugaucgcccugccucauggccuucuggauucagggccugcauauggaaauggugauuaccaaggggaug
pyr-novel-miR-88-5p	ugacgacgagagagagcacgc	pyr-4809	pyr-novel-mir-88	-53.60	1.34	scaffold651.0:47830..47911:-	DangsuA:0.89,DangsuB:0.9	ugacgacgagagagagcacgcuugucaucacccaugaaaggaucaugguuguuuacgggcgugcucucucuuguugucaua
pyr-novel-miR-89-3p	guuuuugaaugaaaggcucaugug	-	pyr-novel-mir-89	-39.30	1.36	Chr3:11996107..11996195:-	DangsuA:0	caugggucuuucauucaaaaauauaucuuucagcgacauguaguauuguuaucaugcuugauauguuuuugaaugaaaggcucaugug
pyr-novel-miR-90-5p	ggacggaacagagugggacaaggc	-	pyr-novel-mir-90	-92.90	0.65	Chr6:14811361..14811630:+	DangsuA:0.89	ggacggaacagagugggacaaggcguuuugucccauguuuggugcgccuaaaacggguggaacgagcuguuccacgugacgaguuuugggugaauuuucauuccaccucacccccuuagaacgacucguuccgcauccguggaacacaaaauuauaaccuuuccgucuccuucuucuuccuccuuguuuccauccgagggcaucuuugcucccgcuuuguuccguuccguccugucccgucccguccugucccauuccguuccguccca
pyr-novel-miR-91-5p	aagcucaggagggauagcgcc	pyr-1657	pyr-novel-mir-91	-34.40	0.96	scaffold235.0:31939..32009:+	DangsuA:0.89,DangsuB:0.9	aagcucaggagggauagcgccuuucucgguuugguuuaaccacguaucgcgcuauccaucuugggcuuca
pyr-novel-miR-92-3p	cagugauaaauaggauguuaagca	-	pyr-novel-mir-92	-32.00	1.14	Chr2:5506673..5506788:-	DangsuA:0	cuuaucacucuauucaucacuauuagauaauuuuaaauuucgagauuuguguaguagauagauacaaauuuuaaaauuuaaacuuguucaacagugauaaauaggauguuaagca
pyr-novel-miR-93-3p	ggaaucuugaugaugcugcau	pyr-559	pyr-novel-mir-93	-53.20	0.86	Chr11:27263749..27263897:+	DangsuA:0.89,DangsuB:0.9	gcagcaucaucaagauucacauacaggcaagggggcuaccuuuaucgaucgaguaaauuguuacugcaccaaucugaauauuuccuucaacuuccuuuugcacuugaaagguaguuccuucgaagugggaaucuugaugaugcugcau
pyr-novel-miR-94-3p	ucggaccaggcuucauucccc	pyr-195	pyr-novel-mir-94	-32.00	0.91	Chr5:18992300..18992383:+	DangsuA:0.89,DangsuB:0.9	ggaauguugucugauucgaaaucuuucggugaagcuugaagauugucaucauuugaaugauuucggaccaggcuucauucccc
pyr-novel-miR-95-3p	cuuggauugaagggagcucc	pyr-53	pyr-novel-mir-95	-81.60	0.95	Chr1:3197611..3197777:+	DangsuA:0.89,DangsuB:0.9	gcucccuuugauucaaaagcaggagggagagagggucuuacacugcugcugguucauggauaccucuggggugcgcacgguaaggaaacugcgcaguauaaggguuugcaugacccaggagaugugaauuccuucuccucuccuuucuuggauugaagggagcucc
pyr-novel-miR-96-5p	ugacaacgagagagagcacgc	pyr-1054	pyr-novel-mir-96	-51.30	1.35	Chr5:16139899..16139979:+	DangsuA:0.89,DangsuB:0.9	ugacaacgagagagagcacgcuugucaucacacaugaaaggaucaugguuguuuacgggcgugcucucucuuguugucau
pyr-novel-miR-97-5p	acacgcauuuagacuaaucuuggc	-	pyr-novel-mir-97	-77.70	1.44	Chr5:28175278..28175458:-	DangsuA:0.89	acacgcauuuagacuaaucuuggccauucaauucaucaaaugaacugaaugaguucacgucauauuauucucuuauucagcaugauaaggugcaaacauguauuauguuauaauauagcgugaacucauucaguuaauuugauuauuucaauuaccaaaauuagucuaaaugcguguaaa
pyr-novel-miR-98-5p	ugccuggcucccuguaugcca	pyr-299	pyr-novel-mir-98	-43.20	0.94	Chr1:5309725..5309807:-	DangsuA:0.89,DangsuB:0.9	ugccuggcucccuguaugccauuugcagaguuccaccgaacaucgauggccuccguggauggcguaugaggagccaugcaua
pyr-novel-miR-99-3p	ucgauaaaccucugcauccag	pyr-1621	pyr-novel-mir-99	-37.70	1.02	Chr14:14834480..14834566:+	DangsuA:0.89	ggaggcagcgguucaucgaucuguuuaugagauuuguugugaaaaaaacacagaacaugaaugggucgauaaaccucugcauccag
pyr-novel-miR-100-3p	gagccaaggaugaauugccgg	pyr-47	pyr-novel-mir-100	-37.10	0.62	scaffold980.0:9351..9510:-	DangsuA:0	agaauauguucauuuuucuccucaaucucuucuucaacuuucuguauauauagcuuaugcauaucccaccauuguaaugcgagcagaaacaaaugaaaauaauagcaagcauugccuggaaaagaagagagugcaauggagccaaggaugaauugccgg
pyr-novel-miR-101-5p	caugugcucuagcucuucagc	pyr-2467	pyr-novel-mir-101	-17.40	0.54	Chr17:14649202..14649265:-	DangsuA:0.87,DangsuB:0.85	caugugcucuagcucuucagcuuggacucucucccuuucaggcacaagguuggcugcaaugaa
pyr-novel-miR-102-3p	gcucaagaaagcugugggaga	pyr-219	pyr-novel-mir-102	-36.90	1.00	Chr2:21695138..21695225:-	DangsuA:0.89,DangsuB:0.9	uuccacagcuuucuugaacuucaauucucugcugucuaaaucucuuucaggauuagcaccauggaagcucaagaaagcugugggaga
pyr-novel-miR-103-3p	auugagugcagcguugaugaa	pyr-494	pyr-novel-mir-103	-21.10	0.62	Chr5:26611007..26611088:-	DangsuA:0	gaucaaucaugcauuugaucaggaaguucagcacuggacgaaccagauugaagaaacaucauugagugcagcguugaugaa
pyr-novel-miR-104-5p	cagccaaggaugacuugccgg	pyr-47	pyr-novel-mir-104	-79.40	1.09	Chr17:19291711..19291928:-	DangsuA:0.87,DangsuB:0.85	cagccaaggaugacuugccggcagcaauguucaguuacaauauuauguaucaacccaaaucuuguauacauauauacauauauauauaucuauauguacauugcauauuuaugggauguaucauguauguugauaucaucucaugcauauauacaugauacagaaagauacaugaucuugugacaaugagaugaucggcaagucaucucuggcuaca
pyr-novel-miR-105-3p	gaugaaaguguaugagaaguggga	-	pyr-novel-mir-105	-75.70	1.33	Chr9:818228..818413:-	DangsuA:0.89	ccacuucucauacauuuucauuccuuucuauuugugcaguuacgguuaaaccacgucaacauuuuauauuacuauuguuuuuugucuuauuaucuauauaaaaaauuaauauaaauguugacaugacuuaaccgugaccgugaccgcacaaaauaagaaaugaugaaaguguaugagaaguggga
pyr-novel-miR-106-5p	cauugagugcagcguugauga	pyr-2229	pyr-novel-mir-106	-42.30	1.08	Chr5:26610942..26611029:-	DangsuA:0.87	cauugagugcagcguugaugaaaguccguauuccuuacgaaucuucauuaggcaucggaaacuuucgucagcgcugcacccaauuau
pyr-novel-miR-107-3p	ccuuccuuggcuaagucucuca	-	pyr-novel-mir-107	-168.40	1.62	Chr15:350810..351042:-	DangsuA:0.89,DangsuB:0.9	aaagacuuagccaaggaaaggcugccgacuuucaccgaggaagagaagaagcugauaaaggucggguccuucgauuuuauuggcaucaacuacuaugcugcaagguacauggaaaggaugccaguuaaaucuugcgguauaguaguugaugccaauaaaaucgaaaaccccuuuaucagcuucuucucuuccucgaugaaagucgggagcccuuccuuggcuaagucucuca
pyr-novel-miR-108-3p	ugccaaaggagaguugcccug	pyr-51	pyr-novel-mir-108	-33.80	0.75	Chr7:12998533..12998614:-	DangsuA:0.87,DangsuB:0.85	gggcuccucccccuuggcaggcacugguguauggugcaacuacaaucacuuucauugaccugccaaaggagaguugcccug
pyr-novel-miR-109-5p	gagccaaggaugaauugccgg	pyr-47	pyr-novel-mir-109	-39.20	0.91	scaffold980.0:132697..132805:+	DangsuA:0	gagccaaggaugaauugccggcgcuauagauaauuaaguucauaaauguguauacaugccaccaaaauccguauauauuugcuugccggcaauuuguucuuggcuaug
pyr-novel-miR-110-5p	accaaauauccaccuaguccagga	-	pyr-novel-mir-110	-46.00	0.88	Chr9:20813884..20814006:+	DangsuA:0	accaaauauccaccuaguccaggaucggcuacaguuauuauaacuuuuaaaggagcuccuuguuuguagccguuggaucaaauuucaacggcccggauuccaaacuagguggauuugguaga
pyr-novel-miR-111-5p	accaaaacuggcuuuaugugugug	-	pyr-novel-mir-111	-42.40	1.57	scaffold202.0.1:580209..580274:-	DangsuA:0.9,DangsuB:0.9	accaaaacuggcuuuaugugugugacuggcuuuaugcaacacacacauaaagccaguuuugguga
pyr-novel-miR-112-5p	uccucuuggugaucgcccugc	pyr-3100	pyr-novel-mir-112	-51.80	1.06	Chr2:21627644..21627741:+	DangsuA:0.89,DangsuB:0.9	uccucuuggugaucgcccugcuuaauauggccuucugaauucagggaacuucuggauucagggccugcauauggacagggugguuaccaaugggaug
pyr-novel-miR-113-5p	uggagaagcagggcacgugca	pyr-486	pyr-novel-mir-113	-38.00	0.83	scaffold424.0:295404..295490:+	DangsuA:0.89,DangsuB:0.9	uggagaagcagggcacgugcaaaccccauuggcuaugcuucaaaugcgagcgaauaaguucuuugcacgugcucccccucuccaac
pyr-novel-miR-114-5p	caccaauaucaacuuuauuug	pyr-2662	pyr-novel-mir-114	-79.90	2.28	Chr12:18817143..18817289:-	DangsuA:0.89,DangsuB:0.9	caccaauaucaacuuuauuuguucauuaauacuuauaaagucauuacacuagaauuuucuuucaaagaaaauucuaguguauugacuuuauaaguauuaauggcuuugguauuaauuaaugaacaaauaaaguugauauuggugug
pyr-novel-miR-115-5p	uuccacggcuuucuugaacug	pyr-379	pyr-novel-mir-115	-36.00	1.03	scaffold160.1.1:88606..88702:+	DangsuA:0.87	uuccacggcuuucuugaacugugcaguuuccagaagaauuaaacuggcagaaauuuuucaugcagauacaaaaacaguucaagaaagcugugaaaa
pyr-novel-miR-116-3p	uugagccgcgucaauaucucc	pyr-18	pyr-novel-mir-116	-40.10	1.00	Chr9:16310058..16310143:+	DangsuA:0.89	agguauugacgcgccucaauuugaacgcguggcuaauaucggagacuuaaccaugcgauuuugauugagccgcgucaauaucucc
pyr-novel-miR-117-3p	cugaaguguuugggggaacuc	pyr-89	pyr-novel-mir-117	-36.70	1.05	Chr13:3051774..3051857:-	DangsuA:0.87,DangsuB:0.85	guucccccgaauacuucauuaggauugauacauaaauucuuugaaggauugcaccgucucuacugaaguguuugggggaacuc
pyr-novel-miR-118-5p	ucggaccaggcuucauucccc	pyr-195	pyr-novel-mir-118	-68.90	0.63	Chr16:8525879..8526148:-	DangsuA:0.87,DangsuB:0.85	ucggaccaggcuucauuccccccaacacaaaaugcaguacguuccuacucauggcaauugaucaguuagauacacccuuuuaugcaucgcugaucaauguaugaauuuugagcauuuucgacgauguagcugcuuguuccauaucaucgaucauguaagcauacagcauaucauucucauuaauuaucguucuaugcauauuuucuccauucauugauuugcagccauaagugagaacacuguacuugaagaagaagaccgguccgggc
pyr-novel-miR-119-3p	aggugcaggugccagugcagg	pyr-4436	pyr-novel-mir-119	-64.20	0.76	Chr3:15446752..15446950:+	DangsuA:0.89,DangsuB:0.9	ugcauuugcaccugcacuugugcucguucauguuucuuccuuccuugaaaaacccuaaaaccaaagcuucagagaauggaaaggguuuuagauauaugagagcaaaaaagacaagaggaaaggaauaagggaaaagaaggaaaauggaaaucagaaggaagaggaggaacaagcaagaggugcaggugccagugcagg
pyr-novel-miR-120-3p	aacggaccggaucaauugaucccu	-	pyr-novel-mir-120	-61.10	1.30	Chr8:1859701..1859822:-	DangsuA:0.89	gggaucaauuaaucugguucguugaaauuugauuaaacggcuacaaacaggggaucccacuaaagguauaauaauuguagccauuggaucaaauuucaacggaccggaucaauugaucccu
pyr-novel-miR-121-3p	uuagaugaccaucaacgaaca	pyr-1333	pyr-novel-mir-121	-78.90	0.81	Chr15:12628870..12629132:-	DangsuA:0.87,DangsuB:0.85	uuuguuguuggucaacuaguuauuccaugguggugguaauuugcagcaguggauauguuuguuguuggucaacuaguuauuccaugguggugguaauuugcagcaguggauauguuuguuguuggucaccuaguuauuccauuguuccauccaucugcuggcuucaauauauaauuuguauuuguauauguuguauauauacaugcaguauuguauauuugacccaugacggacguucugauuagaugaccaucaacgaaca
pyr-novel-miR-122-3p	cgaacuuauugcaacuagcuu	pyr-4693	pyr-novel-mir-122	-32.60	1.21	Chr10:1798887..1798962:-	DangsuA:0.89,DangsuB:0.9	gcuaguuguaauaaguucaaucuuuuuauggccaguagugcccuaaauaagcaucgaacuuauugcaacuagcuu
pyr-novel-miR-123-5p	ugccuggcucccuguaugcca	pyr-299	pyr-novel-mir-123	-44.60	1.06	Chr10:2544511..2544592:-	DangsuA:0.89,DangsuB:0.9	ugccuggcucccuguaugccacaagcagaaguucaauuucuugauuggcuguuguggguggcguacgaggagccaagcaua
pyr-novel-miR-124-5p	caucuccugagcuaauggagagga	-	pyr-novel-mir-124	-105.00	1.48	Chr7:604201..604381:+	DangsuA:0.89,DangsuB:0.9	caucuccugagcuaauggagaggauucuccucaucaaucaucauggaccguuggauuuuuauccaacggcuacaaauaugggggucucuuuaaaguuauaaugauuguagccguuggauaaaaaucuaacagcucagaaugauugaugaggaagaucauuuccauuagcucaggagaaga
pyr-novel-miR-125-3p	ugccaaaggagauuugcucgg	pyr-51	pyr-novel-mir-125	-51.90	0.91	Chr10:3391279..3391400:+	DangsuA:0.89,DangsuB:0.9	gggcaaagucuccucuggcauguagccacuuacaauuacaaaugcuuaauucuggcugagcaagcuggccagccuugcauuacuuuugcagugugcuuuaugccaaaggagauuugcucgg
pyr-novel-miR-126-3p	caucuccauuggcucaggagagga	-	pyr-novel-mir-126	-117.50	1.63	Chr15:7006161..7006340:-	DangsuA:0	ccuuuccuaagucaauggagaggauccuucugaucaagcauugugggcuguuggauuuuuauccaacggcuacaaauagaugaucucuuuaaaguuauaauaauuauaaccguuggaugaaaauccaacgguccacaaugcuugguuagaaggaucaucuccauuggcucaggagagga
pyr-novel-miR-127-3p	gcucucuuuucuucugucauc	-	pyr-novel-mir-127	-46.70	1.11	scaffold1045.0:109892..109979:+	DangsuA:0.87	uugacagaagagagagagcacaacccgccaucggcuaaagagagucuuuuccguuguugggagugugcucucuuuucuucugucauc
pyr-novel-miR-128-3p	ugacuggcucuuaucuuucaug	-	pyr-novel-mir-128	-66.50	1.23	Chr3:26942681..26942832:+	DangsuA:0.89,DangsuB:0.9	ugaaggugaagagccauguuugguagccaaggaugacuugccuaaucaaacaucacauauauauauauauauauauguuuauguauuuauauugugguuuguagcuaggcagucgucuuugggcuauucugacuggcucuuaucuuucaug
pyr-novel-miR-129-5p	ccucuccugagcuaauggagagga	-	pyr-novel-mir-129	-98.20	1.33	Chr2:5902015..5902194:-	DangsuA:0	ccucuccugagcuaauggagaggauccuccuaacccaucaucgugaaccguugaauuuuuauccaacggcuauaauuauuauaacuuuaaagggaccccuuguuuguagccauugaauaaaaauccaacugccuaugaugauggaucaagaggauccuuuccauuagcucaggagagga
pyr-novel-miR-130-5p	accacgugucauaauauaagugaa	-	pyr-novel-mir-130	-20.90	0.91	Chr15:42018615..42018709:+	DangsuA:0	accacgugucauaauauaagugaaaaaauguuaaaaaauaagcuaauguaaaacauaucaaauuuagcauucaauuauauuauaacgcguguug
pyr-novel-miR-131-3p	ugccaaaggagaguugcccug	pyr-51	pyr-novel-mir-131	-35.20	0.84	Chr1:8199260..8199341:-	DangsuA:0.87,DangsuB:0.9	gggcuccucccucuuggcaggcacuggugaaugaugaaacuacaaucacuuucauugaccugccaaaggagaguugcccug
pyr-novel-miR-132-3p	cagucugacaauauaacgugc	-	pyr-novel-mir-132	-53.60	1.85	Chr15:11924713..11924806:-	DangsuA:0.89	uuguuauauugucagauugucaaucugaacccuuaauuaccauuaauuuacguaauuaaugguucagauugacagucugacaauauaacgugc
pyr-novel-miR-133-3p	gcucucuaugcuucugucauc	pyr-3566	pyr-novel-mir-133	-46.80	1.26	Chr14:16255956..16256040:+	DangsuA:0.89,DangsuB:0.9	uugacagaagauagagagcacagauggaugacuugcaauggacuaugcaucucacuccuuugugcucucuaugcuucugucauc
pyr-novel-miR-134-5p	uugacagaagagagugagcac	pyr-69	pyr-novel-mir-134	-41.30	0.98	Chr2:14734589..14734675:+	DangsuA:0.87,DangsuB:0.85	uugacagaagagagugagcacacagaggcacuugccauaaagcguaugccauugcuuuugcgugcucaugccucuuucugucagcu
pyr-novel-miR-135-5p	ugacaacgagagagagcacgc	pyr-1054	pyr-novel-mir-135	-51.30	1.35	Chr5:16176409..16176489:+	DangsuA:0.89,DangsuB:0.9	ugacaacgagagagagcacgcuugucaucacacaugaaaggaucaugguuguuuacgggcgugcucucucuuguugucau
pyr-novel-miR-136-3p	uuuggauugaagggagcucua	pyr-53	pyr-novel-mir-136	-83.50	0.92	Chr14:16388510..16388703:+	DangsuA:0.89,DangsuB:0.9	gagcuccuugaaguccaaaagaaggugaugcuggguggauagagcugcugagcuauggaucccagaguccuauauguccuauaucucagaucagaugagaugcgauggaaaggaugauaggcuuguggcuugcauaucucaggagcugcauuaccuguacgcugccucuuuuuuuggauugaagggagcucua
pyr-novel-miR-137-3p	guugggggccugcgagggacu	-	pyr-novel-mir-137	-42.70	0.97	Chr9:3543697..3543781:+	DangsuA:0.89,DangsuB:0.9	ucccucaaaggcucccaauauuccaugucaauacgguguccgaucaacgucaaguaugggaauguugggggccugcgagggacu
pyr-novel-miR-138-5p	aaccuggcucugauacca	-	pyr-novel-mir-138	-54.10	0.56	Chr7:9022045..9022273:-	DangsuA:0.09,DangsuB:0.16	aaccuggcucugauaccaauucuucggaauguggguaaaauuugcaccuaaaaccagcucguaaggaaagggugcuaagagcucuuaaccacuccacaauaaucuauuucuccgauguuggacaauuggguccuacaacccgggaucguaugacuuauaacgcguaauauagugaacaucauaaucauauccgcacugaguugaguucuauaucagcagcaaggagaa
pyr-novel-miR-139-3p	uugagccgugccaauaucacg	pyr-762	pyr-novel-mir-139	-38.70	1.08	Chr9:16383163..16383246:+	DangsuA:0.89	ggauauugguccgguucaauaagaaaacagugcucuaaaagugcuugagcucugcuuuuugauugagccgugccaauaucacg
pyr-novel-miR-140-3p	auccaacgaagcaggagcuga	pyr-1681	pyr-novel-mir-140	-32.70	0.82	Chr13:1532702..1532786:-	DangsuA:0.89	agcugcugacucguugguucaagaacucaucgugcaaaugcuacaagaagugguguguuucugauccaacgaagcaggagcuga
pyr-novel-miR-141-5p	ucauuuggcaucucuuuuucgu	-	pyr-novel-mir-141	-29.10	1.12	Chr15:42264533..42264604:-	DangsuA:0	ucauuuggcaucucuuuuucguucuuuucuuuggaccaagaaagagaaggaaaaaaggaugccaaaaugcu
pyr-novel-miR-142-3p	ucgauaaaccucugcauccag	pyr-1621	pyr-novel-mir-142	-34.40	0.91	Chr6:4151973..4152059:+	DangsuA:0.89	ggaggcagcgguucaucgaucuguuuaugagauuuuguugugaguaaacacaguacaugaaucggucgauaaaccucugcauccag
pyr-novel-miR-143-5p	ucccucaagcgcuuccaauauu	-	pyr-novel-mir-143	-38.10	1.00	Chr17:2125963..2126046:-	DangsuA:0.89,DangsuB:0.9	ucccucaagcgcuuccaauauuccauaucaguacuaugaucgaucaacgucgaguaugggaauguuggaagccugagggaacu
pyr-novel-miR-144-3p	ugccaaaggagaguugcccuu	pyr-51	pyr-novel-mir-144	-45.40	1.03	Chr4:10435757..10435852:-	DangsuA:0.89,DangsuB:0.9	gggcuucucuccaguggcaggaaauauaaauggucaugaggcauggauuuucuguucucucgugaguuauaaccugccaaaggagaguugcccuu
pyr-novel-miR-145-5p	cagggaagagguagagcaugg	-	pyr-novel-mir-145	-56.60	1.32	Chr9:1889785..1889870:+	DangsuA:0.89,DangsuB:0.9	cagggaagagguagagcauggauggaguucucaagagcaaaauagagcucuugugacucuacucaugcacugccucuucccuggc
pyr-novel-miR-146-3p	accuagcucugauaccauaaa	pyr-1970	pyr-novel-mir-146	-34.00	1.21	Chr8:12667777..12667860:+	DangsuA:0.89,DangsuB:0.9	uguggugucaggacuauguuaugugaauguuguuacauaauauuguguuacucguacauauaaccuagcucugauaccauaaa
pyr-novel-miR-147-5p	ggagcaucaucaagauucaca	pyr-2481	pyr-novel-mir-147	-37.80	1.15	Chr1:5999248..5999331:+	DangsuA:0.89,DangsuB:0.9	ggagcaucaucaagauucacaaucuuauuugggcuccaauuuuagccccauuugaugauaugagaaucuugaugaugcugcag
pyr-novel-miR-148-5p	uccaaagggaucgcauugaucc	pyr-2351	pyr-novel-mir-148	-33.30	1.04	Chr1:6573286..6573362:+	DangsuA:0.89,DangsuB:0.9	uccaaagggaucgcauugaucccagcuaacuauuuauuuccaccguuugguuuggaucaugcuaucccuuuggauu
pyr-novel-miR-149-5p	aaggcuuuaaggaaguuguugg	-	pyr-novel-mir-149	-53.30	1.13	Chr13:1725322..1725449:-	DangsuA:0.89,DangsuB:0.9	aaggcuuuaaggaaguuguuggaauggaaggguaggaaagaagaaacuucucuucuauuuuccaaauucaagagagaaaauuucuuuccuaucccucccauuccuucaauuugcuaaaguuucuccc
pyr-novel-miR-150-5p	auugagugcagcguugaugaa	pyr-494	pyr-novel-mir-150	-41.50	1.19	Chr10:4718860..4718946:-	DangsuA:0	auugagugcagcguugaugaaaguucguauuccuucugaaucuucauuagggcaucgaaacauuucaucaacgcugcacccaauua
pyr-novel-miR-151-3p	cuaauuucaucaugguaucagagc	-	pyr-novel-mir-151	-64.90	0.89	Chr12:19164643..19164827:-	DangsuA:0.89	cugauaccaugauaaaauugauguuccaccauaaaaaaguugucccacaucggugaggaacaagguugaguugucccacaucggugaagaacaagguuuguuaugugcuuauauggucuuggcuacuccucauauugccaauuaguuuuaugguggaauccuaauuucaucaugguaucagagc
pyr-novel-miR-152-5p	accuagcucugauaccauaaa	pyr-1970	pyr-novel-mir-152	-21.60	0.57	Chr15:7533131..7533252:-	DangsuA:0.87,DangsuB:0.85	accuagcucugauaccauaaacagaaauuaaaucauggcccauugaauuuuuuuaacucaaggaauuuuguuacguuguagaguguacaauauauucuuuuguggugucaagauuucguua
pyr-novel-miR-153-3p	gaagaccuuggggagagugga	-	pyr-novel-mir-153	-35.10	0.95	Chr6:8949864..8949929:-	DangsuA:0.89	acucucccucaagggcuucgaccaaugucagacauggcgagcucgaagaccuuggggagagugga
pyr-novel-miR-154-5p	auaccaccuuagaugacaucugau	-	pyr-novel-mir-154	-75.30	1.23	scaffold640.0:34027..34247:-	DangsuA:0.89	auaccaccuuagaugacaucugauguggacggucacaucauuugaaaaauuugcaaaacucaaggaaaugaaggagaaagacucuucguauaccacaaucauuauuuaauuaacuaguuuuucuuaauuauuaguuuauuaaauaaugaacuaaauuuaaaaaucuaauuaauucaaauaauguggcuauucauaucaaaugucaccuaaggugguauga
pyr-novel-miR-155-5p	uggagaagcagggcacgugca	pyr-486	pyr-novel-mir-155	-38.00	0.83	scaffold424.0:81684..81770:-	DangsuA:0.89,DangsuB:0.9	uggagaagcagggcacgugcaaaccccauuggcuaugcuucaaaugcgagcgaauaaguucuuugcacgugcucccccucuccaac
pyr-novel-miR-156-5p	accuagcucugauaccauaaa	pyr-1970	pyr-novel-mir-156	-35.00	0.57	Chr8:12667839..12668063:+	DangsuA:0.87,DangsuB:0.85	accuagcucugauaccauaaauaaauuuagaucccaaacccaccaaauuuuuguaacaaaaauuaguucauauuuauuuuuucguaguaucaagguuucguuauucacauauuggagccaaauuuacauguuguagagucuacauauauuuuuuacauuuuuaacuucaauaauuucauuauguugccgaguguauauucuuuuguaguauuagaguuucguua
pyr-novel-miR-157-3p	cgaacuuauugcaacuagcuu	pyr-4693	pyr-novel-mir-157	-27.90	1.07	Chr10:12255679..12255754:-	DangsuA:0.89,DangsuB:0.9	gcuaguuguaauaaguucaaucuuuuuauggccaguaguucccuaaauaagcaucgaacuuauugcaacuagcuu
pyr-novel-miR-158-3p	ucggaccaggcuucauucccc	pyr-195	pyr-novel-mir-158	-23.60	0.79	Chr1:10131081..10131144:+	DangsuA:0.89,DangsuB:0.9	aggaauguuaucugguacgaggcuaguuaaguuggcaauuucucggaccaggcuucauucccc
pyr-novel-miR-159-5p	uuccacggcuuucuugaacug	pyr-379	pyr-novel-mir-159	-36.00	1.03	scaffold160.1.1:88606..88703:+	DangsuA:0	uuccacggcuuucuugaacugugcaguuuccagaagaauuaaacuggcagaaauuuuucaugcagauacaaaaacaguucaagaaagcugugaaaaa
pyr-novel-miR-160-3p	ccucaaucccucuggaucuggaaa	-	pyr-novel-mir-160	-102.30	1.01	Chr15:28433338..28433588:+	DangsuA:0	uuccauuucccaagggauugaggucaauuuagugggaaauugauuagaaaauguuuguuaggagggauuagaaaugccugauaugagcaugcguuuguauugccugguuugcaaaucccuacuugggaggagucauuuacaaauaucucucacaugcccuugcaaugcucauggagggcaucucuaaucccucauuauuuugcuguccauuucuuaauaacuuagaccucaaucccucuggaucuggaaa
pyr-novel-miR-161-3p	ucggaccaggcuucauucccc	pyr-195	pyr-novel-mir-161	-29.90	0.79	Chr16:8526127..8526208:-	DangsuA:0.89,DangsuB:0.9	ggaaugcugucugguucgagaccuuuccuuugaagcaaagaacaugaacaucgaaugauuucggaccaggcuucauucccc
pyr-novel-miR-162-3p	ggaauguugucuggcucgagg	pyr-56	pyr-novel-mir-162	-49.00	0.49	Chr16:9886666..9886873:-	DangsuA:0.87,DangsuB:0.85	ucguaccacccauuucauuucucucacucaccacgaucacacaccacuucucccucccccucuuucuccuacccccuccucucugucucugucucugucucugucguucaugguuaggguaaagcugcuuuugugaaauggaggcagaaagaucaaagaagaggaagcaaauuuguuuuuuugaggggaauguugucuggcucgagg
pyr-novel-miR-163-3p	ucggaccaggcuucauucccc	pyr-195	pyr-novel-mir-163	-38.80	1.08	Chr10:9963113..9963196:+	DangsuA:0.89,DangsuB:0.9	ggaauguugucugguucgagaucuuucgauaaaacuugaagaucguuaucaucugaaugaucucggaccaggcuucauucccc
pyr-novel-miR-164-3p	gaagaccuuggggagagugga	-	pyr-novel-mir-164	-38.60	1.02	Chr6:8949864..8949930:-	DangsuA:0	cacucucccucaagggcuucgaccaaugucagacauggcgagcucgaagaccuuggggagagugga
pyr-novel-miR-165-3p	gcucaccucucucucugucagc	pyr-625	pyr-novel-mir-165	-41.80	0.97	Chr15:11702172..11702259:-	DangsuA:0.89,DangsuB:0.9	uugacagaagagagugagcacacacaggcagcaauuguauaaaaucauaccuuugggcggugcgugcucaccucucucucugucagc
pyr-novel-miR-166-5p	aaaccaaaugauauggauguggga	-	pyr-novel-mir-166	-23.30	0.90	Chr12:5769788..5769883:+	DangsuA:0.89	aaaccaaaugauauggaugugggauguuaaugauugaauuauuauuuaagugucgauuaacauguuuauuuccuauugauuacacaucauuuggu
pyr-novel-miR-167-3p	caugugcucuagcucuucagc	pyr-2467	pyr-novel-mir-167	-32.30	0.98	Chr17:14649244..14649315:-	DangsuA:0.89,DangsuB:0.9	uggagaagcagggcacaugccagauauaucagcauugucugagaauuuugcaugugcucuagcucuucagc
pyr-novel-miR-168-3p	ucucacaaagaagauccggcgaga	-	pyr-novel-mir-168	-67.90	0.96	Chr6:9545404..9545606:-	DangsuA:0.89	cucucuagauccuuuuggugaggaucauggggauccgugaaucauguccauucaucguacauugugcagucaguuuuugucaaguccuguuuguguuuaauuuuaaauaaaaauauuuaaaauaauuuaugaccucauuguguacgaugaacggacaaaauuaacaaauuuucgagauucucacaaagaagauccggcgaga
