# Supplementary material for: The Effect of Different Pollination on the Expression of Dangshan Su Pear MicroRNA
Source: Biomed Res Int. 2017 Apr 10;2017:2794040. doi: 10.1155/2017/2794040 (PMC5402243; doi:10.1155/2017/2794040)
Supplement: Supplementary file 1 — These Supplementary Materials contained the detailed data of the primer sequences used in this study, those known and novel microRNAs, differentially expressed microRNAs, the target genes of the differentially expressed microRNAs and which corresponding GO function enrichment analysis and KEGG pathway analysis in “Dangshan su” Pear of different male parent pollination. [file 2794040.f1.zip › Supplementary Material/Supplementary Material4/Diff_exprs.xls]

#name	#name	logFC	PValue	FDR
pyr-novel-miR-65-5p	pyr-novel-miR-65-5p	3.287712813	1.97E-05	0.018022665
pyr-novel-miR-49-3p	pyr-novel-miR-49-3p	2.730137807	0.000117282	0.023847663
pyr-1395	pyr-1395	2.731501551	0.000146032	0.023847663
pyr-2781	pyr-2781	2.731501551	0.000146032	0.023847663
pyr-1804	pyr-1804	2.731501551	0.000146032	0.023847663
pyr-novel-miR-65-3p	pyr-novel-miR-65-3p	2.685316963	0.000182841	0.023847663
pyr-novel-miR-79-3p	pyr-novel-miR-79-3p	2.685316963	0.000182841	0.023847663
pyr-novel-miR-79-5p	pyr-novel-miR-79-5p	2.489793185	0.000838975	0.095747999
pyr-novel-miR-124-3p	pyr-novel-miR-124-3p	-3.607261771	0.001419505	0.144000918
pyr-2216	pyr-2216	-2.633279858	0.001831165	0.146433233
pyr-novel-miR-34-3p	pyr-novel-miR-34-3p	2.242143222	0.00208503	0.146433233
pyr-novel-miR-125-3p	pyr-novel-miR-125-3p	2.242143222	0.00208503	0.146433233
pyr-3166	pyr-3166	2.242143222	0.00208503	0.146433233
pyr-3229	pyr-3229	-6.707797612	0.002863891	0.163289673
pyr-novel-miR-137-5p	pyr-novel-miR-137-5p	2.136953121	0.002989088	0.163289673
pyr-4860	pyr-4860	2.130574644	0.003398142	0.163289673
pyr-3330	pyr-3330	2.130574644	0.003398142	0.163289673
pyr-4157	pyr-4157	2.130574644	0.003398142	0.163289673
pyr-4218	pyr-4218	2.130574644	0.003398142	0.163289673
pyr-835	pyr-835	-2.679430717	0.004750396	0.216855588
pyr-4614	pyr-4614	2.018366758	0.005330397	0.231745363
pyr-novel-miR-122-5p	pyr-novel-miR-122-5p	2.062208028	0.006232526	0.247404181
pyr-novel-miR-157-5p	pyr-novel-miR-157-5p	2.062208028	0.006232526	0.247404181
pyr-novel-miR-9-3p	pyr-novel-miR-9-3p	2.432689159	0.007066228	0.268811079
pyr-964	pyr-964	-3.079825508	0.009774911	0.343249751
pyr-3653	pyr-3653	-3.079825508	0.009774911	0.343249751
pyr-novel-miR-127-3p	pyr-novel-miR-127-3p	-2.123665039	0.013641236	0.367252292
pyr-novel-miR-30-3p	pyr-novel-miR-30-3p	-2.123665039	0.013641236	0.367252292
pyr-3809	pyr-3809	1.728384038	0.014020464	0.367252292
pyr-870	pyr-870	6.19627473	0.014078675	0.367252292
pyr-1557	pyr-1557	-6.183403892	0.014078675	0.367252292
pyr-3925	pyr-3925	-6.183403892	0.014078675	0.367252292
pyr-novel-miR-10-3p	pyr-novel-miR-10-3p	-6.183403892	0.014078675	0.367252292
pyr-89	pyr-89	-6.183403892	0.014078675	0.367252292
pyr-1677	pyr-1677	-6.183403892	0.014078675	0.367252292
pyr-1816	pyr-1816	2.033079811	0.016039328	0.385365967
pyr-4034	pyr-4034	2.033079811	0.016039328	0.385365967
pyr-4785	pyr-4785	2.033079811	0.016039328	0.385365967
pyr-629	pyr-629	1.609444438	0.018915534	0.442817503
pyr-630	pyr-630	1.683853736	0.019794238	0.447095187
pyr-4249	pyr-4249	2.140020848	0.020077659	0.447095187
pyr-novel-miR-144-3p	pyr-novel-miR-144-3p	1.571332389	0.021328125	0.463632805
pyr-novel-miR-107-5p	pyr-novel-miR-107-5p	-2.81878858	0.022208097	0.471534715
pyr-novel-miR-131-3p	pyr-novel-miR-131-3p	1.557773866	0.023370652	0.47416456
pyr-novel-miR-108-3p	pyr-novel-miR-108-3p	1.557773866	0.023370652	0.47416456
pyr-1613	pyr-1613	2.74532422	0.029588432	0.574771022
pyr-4017	pyr-4017	2.74532422	0.029588432	0.574771022
pyr-753	pyr-753	5.839315094	0.034782609	0.577391304
pyr-518	pyr-518	5.839315094	0.034782609	0.577391304
pyr-1950	pyr-1950	-5.826494434	0.034782609	0.577391304
pyr-4735	pyr-4735	-5.826494434	0.034782609	0.577391304
pyr-317	pyr-317	-5.826494434	0.034782609	0.577391304
pyr-1983	pyr-1983	-5.826494434	0.034782609	0.577391304
pyr-3417	pyr-3417	-5.826494434	0.034782609	0.577391304
pyr-4011	pyr-4011	-5.826494434	0.034782609	0.577391304
pyr-166	pyr-166	2.22580297	0.036520717	0.58497219
pyr-401	pyr-401	2.22580297	0.036520717	0.58497219
pyr-novel-miR-144-5p	pyr-novel-miR-144-5p	1.519673818	0.04081675	0.606244655
pyr-novel-miR-17-3p	pyr-novel-miR-17-3p	-1.395267376	0.041168859	0.606244655
pyr-novel-miR-117-3p	pyr-novel-miR-117-3p	-1.395267376	0.041168859	0.606244655
pyr-novel-miR-84-3p	pyr-novel-miR-84-3p	-1.395267376	0.041168859	0.606244655
pyr-novel-miR-46-3p	pyr-novel-miR-46-3p	-1.395267376	0.041168859	0.606244655
pyr-novel-miR-18-3p	pyr-novel-miR-18-3p	1.695327362	0.04221484	0.611780141
pyr-2609	pyr-2609	-1.594175831	0.045254176	0.644094319
pyr-novel-miR-157-3p	pyr-novel-miR-157-3p	1.318489949	0.047463434	0.644094319
pyr-novel-miR-122-3p	pyr-novel-miR-122-3p	1.318489949	0.047463434	0.644094319
pyr-novel-miR-107-3p	pyr-novel-miR-107-3p	-1.332249204	0.047644598	0.644094319
pyr-4693	pyr-4693	1.315364169	0.047971976	0.644094319
