# Supplementary material for: The Effect of Different Pollination on the Expression of Dangshan Su Pear MicroRNA
Source: Biomed Res Int. 2017 Apr 10;2017:2794040. doi: 10.1155/2017/2794040 (PMC5402243; doi:10.1155/2017/2794040)
Supplement: Supplementary file 1 — These Supplementary Materials contained the detailed data of the primer sequences used in this study, those known and novel microRNAs, differentially expressed microRNAs, the target genes of the differentially expressed microRNAs and which corresponding GO function enrichment analysis and KEGG pathway analysis in “Dangshan su” Pear of different male parent pollination. [file 2794040.f1.zip › Supplementary Material/Supplementary Material5/miRNA_target_predict.txt]

#	mature_id	target_gene	tafinder_score	range	alignment	tapirfa_score	mfe_ratio	alignment
1	pyr-4011	Pbr032620.1	3	209-230	target 5' GAGUCCCCACCAAACAUUUCAG 3'<br /> : :::::: :::::::.:::::<br />query 3' CCCAGGGG-GGUUUGUGAAGUC 5'	3	0.75	CCCAGGGG-GGUUUGUGAAGUC<br />|.||||||.|||||||o|||||<br />GAGUCCCCACCAAACAUUUCAG
2	pyr-novel-miR-30-3p	Pbr026704.1	4	596-615	target 5' GA-GGUAGAGGAAAAGAGAGA 3'<br /> :: :..:::.:::::::::: <br />query 3' CUACUGUCUUCUUUUCUCUCG 5'	-	-	-
3	pyr-1816	Pbr012696.1	4	25-46	target 5' AAGGGCGACCUGACGAACACAA 3'<br /> : ::: ::::::: ::::::::<br />query 3' UCCCCACUGGACU-CUUGUGUU 5'	-	-	-
4	pyr-novel-miR-84-3p	Pbr020839.1	3	979-999	target 5' GGUUUCCUCCAAACACUUCAA 3'<br /> :. ::::.:::::::::::: <br />query 3' CUCAAGGGGGUUUGUGAAGUC 5'	3	0.75	CUCAAGGGGGUUUGUGAAGUC<br />|o.||||o||||||||||||.<br />GGUUUCCUCCAAACACUUCAA
5	pyr-317	Pbr018332.1	1	230-249	target 5' CAGGUGCAGGUGCAAAUGCA 3'<br /> :::::::::::::::::::<br />query 3' CUCCACGUCCACGUUUACGU 5'	1	0.87	CUCCACGUCCACGUUUACGU<br />.|||||||||||||||||||<br />CAGGUGCAGGUGCAAAUGCA
6	pyr-518	Pbr004599.1	2	697-718	target 5' GGAAUGGGAGGCAUAGGCAAGA 3'<br /> ::::::::::::::::: ::::<br />query 3' CCUUACCCUCCGUAUCCCUUCU 5'	2	0.87	CCUUACCCUCCGUAUCCCUUCU<br />|||||||||||||||||.||||<br />GGAAUGGGAGGCAUAGGCAAGA
7	pyr-novel-miR-46-3p	Pbr009275.1	4	256-276	target 5' GGGUUUCGCCAAACGCUUCAU 3'<br /> :.:::.: ::::::.::::: <br />query 3' CUCAAGGGGGUUUGUGAAGUC 5'	-	-	-
8	pyr-401	Pbr003756.3	4	376-395	target 5' AAUGGGAGUAAUGGGGAGGA 3'<br /> :::::::: :::.::::.::<br />query 3' UUACCCUCCUUAUCCCUUCU 5'	-	-	-
9	pyr-4860	Pbr034330.1	4	766-784	target 5' UUCAAGCCUUUUAGGGAGA 3'<br /> : :::::::: :::::::<br />query 3' ACCUUCGGAAACUCCCUCU 5'	-	-	-
10	pyr-2216	Pbr014657.1	3.5	678-698	target 5' GAGUUCCUCCAAACUCUUCAU 3'<br /> :::::::.:::::: ::::: <br />query 3' CUCAAGGGGGUUUGUGAAGUU 5'	3.5	0.84	CUCAAGGGGGUUUGUGAAGUU<br />|||||||o||||||.|||||.<br />GAGUUCCUCCAAACUCUUCAU
11	pyr-2609	Pbr021104.1	4	3614-3635	target 5' GAGAUCAGGCUGGCAGCUUGUA 3'<br /> ::::::: ::::::::::: .:<br />query 3' CUCUAGUACGACCGUCGAA-GU 5'	-	-	-
12	pyr-401	Pbr036417.1	0.5	3129-3148	target 5' GAUGGGAGGAAUAGGGAAGA 3'<br /> .:::::::::::::::::::<br />query 3' UUACCCUCCUUAUCCCUUCU 5'	0.5	0.99	UUACCCUCCUUAUCCCUUCU<br />o|||||||||||||||||||<br />GAUGGGAGGAAUAGGGAAGA
13	pyr-novel-miR-79-3p	Pbr002903.1	4	248-268	target 5' CAGGGCAACUCUUCUUUGGCU 3'<br /> :::::::: :::.::::::: <br />query 3' GUCCCGUUAAGAGGAAACCGU 5'	3	0.85	GUCCCGUUAAGAGGAAACCGU<br />||||||||.|||o|||||||.<br />CAGGGCAACUCUUCUUUGGCU
14	pyr-1613	Pbr023838.1	4	1035-1055	target 5' AGGCAAAUCAUUCUUGGCUUU 3'<br /> :::::: ::::.:::::::. <br />query 3' UCCGUUCAGUAGGAACCGAGU 5'	-	-	-
15	pyr-518	Pbr042691.1	3.5	458-479	target 5' GGGAUGGGUGGCAUAGGUAAGA 3'<br /> ::.::::: :::::::: ::::<br />query 3' CCUUACCCUCCGUAUCCCUUCU 5'	3.5	0.78	CCUUACCCUCCGUAUCCCUUCU<br />||o|||||.||||||||.||||<br />GGGAUGGGUGGCAUAGGUAAGA
16	pyr-novel-miR-46-3p	Pbr028018.1	3.5	966-985	target 5' GAG-UGCUCUAAACACUUCAG 3'<br /> ::: : :.:.:::::::::::<br />query 3' CUCAAGGGGGUUUGUGAAGUC 5'	-	-	-
17	pyr-401	Pbr003529.1	3	767-786	target 5' UAUUGGUGGAAUAGGGAAGA 3'<br /> :: :: :::::::::::::<br />query 3' UUACCCUCCUUAUCCCUUCU 5'	-	-	-
18	pyr-novel-miR-124-3p	Pbr023144.1	4	31-54	target 5' UCCUCUCCUGAGCUAAUGGAGAGG 3'<br /> :: :::::::::::::::::.: :<br />query 3' AGAAGAGGACUCGAUUACCUUUAC 5'	-	-	-
19	pyr-1816	Pbr024256.1	4	335-355	target 5' AGGAGAGUUCUGAGAACACAA 3'<br /> ::: : : .::::::::::::<br />query 3' UCCCCACUGGACUCUUGUGUU 5'	-	-	-
20	pyr-1395	Pbr023060.1	4	24-41	target 5' UGGC-AUUAUCCUUUGGCA 3'<br /> ::: ::: ::::::::::<br />query 3' CCCGUUAAGAGGAAACCGU 5'	-	-	-
21	pyr-89	Pbr004737.1	0.5	795-815	target 5' GAGUUCCUCCAAACACUUCAU 3'<br /> :::::::.:::::::::::::<br />query 3' CUCAAGGGGGUUUGUGAAGUA 5'	0.5	0.94	CUCAAGGGGGUUUGUGAAGUA<br />|||||||o|||||||||||||<br />GAGUUCCUCCAAACACUUCAU
22	pyr-1677	Pbr026999.2	-	-	-	3		UCCACGUC--CACGUUUACGUCU<br />||||||||...||||||||||||<br />AGGUGCAGCCUUGCAAAUGCAGA
23	pyr-novel-miR-17-3p	Pbr018761.1	2	352-372	target 5' GAGUUUCUCCAAACACUUCAU 3'<br /> :::::.:.:::::::::::: <br />query 3' CUCAAGGGGGUUUGUGAAGUC 5'	2	0.83	CUCAAGGGGGUUUGUGAAGUC<br />|||||o|o||||||||||||.<br />GAGUUUCUCCAAACACUUCAU
24	pyr-4860	Pbr036615.1	4	894-912	target 5' UGGGAGUCUUUGUGGGAGG 3'<br /> :::.::.::::: :::::.<br />query 3' ACCUUCGGAAACUCCCUCU 5'	-	-	-
25	pyr-novel-miR-131-3p	Pbr020849.1	4	355-374	target 5' CAGGGCAA-UCUCUUUUGGCC 3'<br /> :::::::: ::::.:::::: <br />query 3' GUCCCGUUGAGAGGAAACCGU 5'	-	-	-
26	pyr-1677	Pbr011776.1	0.5	231-251	target 5' AGGUGCAGGUGCAAAUGCAGG 3'<br /> ::::::::::::::::::::.<br />query 3' UCCACGUCCACGUUUACGUCU 5'	0.5	0.98	UCCACGUCCACGUUUACGUCU<br />||||||||||||||||||||o<br />AGGUGCAGGUGCAAAUGCAGG
27	pyr-novel-miR-127-3p	Pbr003141.1	4	842-861	target 5' GA-GAGAGAAGAGAAGAGAGA 3'<br /> :: :: ::::::.::::::: <br />query 3' CUACUGUCUUCUUUUCUCUCG 5'	-	-	-
28	pyr-novel-miR-127-3p	Pbr005286.1	4	822-842	target 5' GAAGAAAGAAGAGAAGAGAGA 3'<br /> :: :: ::::::.::::::: <br />query 3' CUACUGUCUUCUUUUCUCUCG 5'	-	-	-
29	pyr-novel-miR-122-3p	Pbr008878.1	4	2110-2131	target 5' AAGCUAGUAUGUAAUGAGUUCA 3'<br /> :::::::: ::.:::.::::: <br />query 3' UUCGAUCA-ACGUUAUUCAAGC 5'	-	-	-
30	pyr-518	Pbr005286.1	4	583-604	target 5' GGUAUGGGAGGUCUAGGGAAGA 3'<br /> :: ::::::::. :::::::::<br />query 3' CCUUACCCUCCGUAUCCCUUCU 5'	-	-	-
31	pyr-novel-miR-144-5p	Pbr020956.1	4	1352-1372	target 5' CCAGCCAAUGGAGAGAAGCUA 3'<br /> :: :::: :::::::::::. <br />query 3' GGACGGUGACCUCUCUUCGGG 5'	-	-	-
32	pyr-4017	Pbr036417.1	3.5	3127-3148	target 5' GGGAUGGGAGGAAUAGGGAAGA 3'<br /> ::.::::::::::: ::.::::<br />query 3' CCUUACCCUCCUUAACCUUUCU 5'	3.5	0.89	CCUUACCCUCCUUAACCUUUCU<br />||o|||||||||||.||o||||<br />GGGAUGGGAGGAAUAGGGAAGA
33	pyr-518	Pbr036556.1	4	64-85	target 5' GGAGUUGGGGGCAUAGGAAAGA 3'<br /> :::.: ::.:::::::: ::::<br />query 3' CCUUACCCUCCGUAUCCCUUCU 5'	-	-	-
34	pyr-novel-miR-157-3p	Pbr002483.1	1	133-153	target 5' AAGCUAGUUGCAAUAAGUUCA 3'<br /> :::::::::::::::::::: <br />query 3' UUCGAUCAACGUUAUUCAAGC 5'	1	0.97	UUCGAUCAACGUUAUUCAAGC<br />||||||||||||||||||||.<br />AAGCUAGUUGCAAUAAGUUCA
35	pyr-1677	Pbr042907.1	2.5	1866-1886	target 5' AGGUGCAGGUGCAGGUGCAGG 3'<br /> :::::::::::::..:::::.<br />query 3' UCCACGUCCACGUUUACGUCU 5'	2.5	0.97	UCCACGUCCACGUUUACGUCU<br />|||||||||||||oo|||||o<br />AGGUGCAGGUGCAGGUGCAGG
36	pyr-518	Pbr004600.1	2	1183-1204	target 5' GGAAUGGGAGGCAUAGGCAAGA 3'<br /> ::::::::::::::::: ::::<br />query 3' CCUUACCCUCCGUAUCCCUUCU 5'	2	0.87	CCUUACCCUCCGUAUCCCUUCU<br />|||||||||||||||||.||||<br />GGAAUGGGAGGCAUAGGCAAGA
37	pyr-166	Pbr004586.1	4	535-556	target 5' GGAAUGGGAGGCAUAGGCAAGA 3'<br /> ::::::::::: ::::: ::::<br />query 3' CCUUACCCUCCUUAUCCCUUCU 5'	-	-	-
38	pyr-1557	Pbr014657.1	3	678-698	target 5' GAGUUCCUCCAAACUCUUCAU 3'<br /> :::::::.:::::: :::::.<br />query 3' CUCAAGGGGGUUUGUGAAGUG 5'	3	0.82	CUCAAGGGGGUUUGUGAAGUG<br />|||||||o||||||.|||||o<br />GAGUUCCUCCAAACUCUUCAU
39	pyr-1816	Pbr027648.1	3	604-624	target 5' AGGGGCAACCUGAGAACACAU 3'<br /> ::::: ::::::::::::: <br />query 3' UCCCCACUGGACUCUUGUGUU 5'	3	0.83	UCCCCACUGGACUCUUGUGUU<br />|||||..|||||||||||||.<br />AGGGGCAACCUGAGAACACAU
40	pyr-novel-miR-49-3p	Pbr002912.1	4	179-199	target 5' CU-AGCAGCUCUCCUCUGGCAG 3'<br /> :: ::::: :::::: ::::::<br />query 3' GACUCGUCUAGAGGAAACCGUC 5'	-	-	-
41	pyr-4017	Pbr019924.1	3.5	631-652	target 5' GGGAUGGGAGGAAUGGGGAAGA 3'<br /> ::.::::::::::: ::.::::<br />query 3' CCUUACCCUCCUUAACCUUUCU 5'	3.5	0.89	CCUUACCCUCCUUAACCUUUCU<br />||o|||||||||||.||o||||<br />GGGAUGGGAGGAAUGGGGAAGA
42	pyr-964	Pbr003642.1	4	1215-1233	target 5' AGAACUCAGGAUGGA-AGUG 3'<br /> :::::::::::::: ::.:<br />query 3' CCUUGAGUCCUACCUAUCGC 5'	-	-	-
43	pyr-4017	Pbr040736.1	4	744-765	target 5' GGAAUGGGUGGAAUUGGCAAGU 3'<br /> :::::::: :::::::: ::: <br />query 3' CCUUACCCUCCUUAACCUUUCU 5'	-	-	-
44	pyr-2609	Pbr023993.1	4	82-102	target 5' GCCAACAUGCUGGCAGCUUCU 3'<br /> : : ::::::::::::::: <br />query 3' CUCUAGUACGACCGUCGAAGU 5'	-	-	-
45	pyr-novel-miR-125-3p	Pbr025044.1	3.5	2126-2145	target 5' UCGA-AAAAUCUCUUUUGGCA 3'<br /> .::: :::::::.:::::::<br />query 3' GGCUCGUUUAGAGGAAACCGU 5'	-	-	-
46	pyr-317	Pbr001615.1	4	3125-3144	target 5' GAGCACCAGGUGCAAAUGCU 3'<br /> ::: ::::::::::::: <br />query 3' CUCCACGUCCACGUUUACGU 5'	-	-	-
47	pyr-4860	Pbr013111.1	3.5	182-200	target 5' GGGAAGCUUUUGGGGGAGG 3'<br /> ::::::.::::.:::::.<br />query 3' ACCUUCGGAAACUCCCUCU 5'	3.5	0.80	ACCUUCGGAAACUCCCUCU<br />.||||||o||||o|||||o<br />GGGAAGCUUUUGGGGGAGG
48	pyr-novel-miR-18-3p	Pbr032486.1	3	2285-2306	target 5' AAGCUAGUAUGUAAUGAGUUCA 3'<br /> :::::::: ::.:::.::::::<br />query 3' UUCGAUCA-ACGUUAUUCAAGU 5'	-	-	-
49	pyr-1395	Pbr042652.1	4	58-76	target 5' GGUCAAUUUUCCUUCGGCA 3'<br /> :: :::::.::::: ::::<br />query 3' CCCGUUAAGAGGAAACCGU 5'	-	-	-
50	pyr-2216	Pbr029150.1	4	1859-1878	target 5' CUGUUCCCCCAAACA-UUCAA 3'<br /> ::::::::::::: :::::<br />query 3' CUCAAGGGGGUUUGUGAAGUU 5'	-	-	-
51	pyr-518	Pbr022033.1	3.5	699-720	target 5' GGGAUGGGAGGAAUGGGGAAGA 3'<br /> ::.:::::::: ::.:::::::<br />query 3' CCUUACCCUCCGUAUCCCUUCU 5'	3.5	0.86	CCUUACCCUCCGUAUCCCUUCU<br />||o||||||||.||o|||||||<br />GGGAUGGGAGGAAUGGGGAAGA
52	pyr-401	Pbr024723.3	3.5	946-965	target 5' GAUGUCUGGAAUAGGGAAGA 3'<br /> .::: :::::::::::::<br />query 3' UUACCCUCCUUAUCCCUUCU 5'	3.5	0.72	UUACCCUCCUUAUCCCUUCU<br />o|||...|||||||||||||<br />GAUGUCUGGAAUAGGGAAGA
53	pyr-novel-miR-30-3p	Pbr014197.1	4	800-819	target 5' GACGGCAG-AGAAAAGAGAGU 3'<br /> :: :.::: :::::::::::.<br />query 3' CUACUGUCUUCUUUUCUCUCG 5'	-	-	-
54	pyr-2216	Pbr034115.1	3.5	314-334	target 5' CCGUUCUCCUAAACACUUCAA 3'<br /> ::::.::.:::::::::::<br />query 3' CUCAAGGGGGUUUGUGAAGUU 5'	3.5	0.71	CUCAAGGGGGUUUGUGAAGUU<br />..||||o||o|||||||||||<br />CCGUUCUCCUAAACACUUCAA
55	pyr-novel-miR-137-5p	Pbr032804.1	4	492-513	target 5' UAUAUUGGAAGCCUUGGAGGGA 3'<br /> ::::::: :::::: ::::::<br />query 3' UUAUAACCCUCGGAAACUCCCU 5'	-	-	-
56	pyr-novel-miR-17-3p	Pbr039312.1	2	199-219	target 5' GAGUUCACCCAAACACUUCAA 3'<br /> :::::: ::::::::::::: <br />query 3' CUCAAGGGGGUUUGUGAAGUC 5'	2	0.81	CUCAAGGGGGUUUGUGAAGUC<br />||||||.|||||||||||||.<br />GAGUUCACCCAAACACUUCAA
57	pyr-4034	Pbr012696.1	4	25-45	target 5' AAGGGCGACCUGACGAACACA 3'<br /> : ::: ::::::: :::::::<br />query 3' UCCCCACUGGACU-CUUGUGU 5'	-	-	-
58	pyr-835	Pbr035308.1	3.5	285-306	target 5' GCUUGCAGAGAGAGAAGUGAGG 3'<br /> ::: .::::.::::::::::: <br />query 3' CGACUGUCUUUCUCUUCACUCG 5'	3	0.84	CGACUGUCUUUCUCUUCACUCG<br />|||.o||||o|||||||||||.<br />GCUUGCAGAGAGAGAAGUGAGG
59	pyr-401	Pbr038473.1	3	603-622	target 5' CAUGGGAGGAAUUGGGAAGA 3'<br /> ::::::::::: :::::::<br />query 3' UUACCCUCCUUAUCCCUUCU 5'	3	0.80	UUACCCUCCUUAUCCCUUCU<br />.|||||||||||.|||||||<br />CAUGGGAGGAAUUGGGAAGA
60	pyr-novel-miR-127-3p	Pbr011966.1	4	164-185	target 5' GAUGGCAGGAGAAAAGGGAAGC 3'<br /> ::::.:::.:::::::.: :::<br />query 3' CUACUGUCUUCUUUUCUC-UCG 5'	-	-	-
61	pyr-novel-miR-137-5p	Pbr007940.1	3.5	2374-2394	target 5' AAGAUUGGG-GCCUUUGAGGGG 3'<br /> :: :::::: :::::::::::.<br />query 3' UUAUAACCCUCGGAAACUCCCU 5'	2.5	0.79	UUAUAACCCUCGGAAACUCCCU<br />||.||||||.|||||||||||o<br />AAGAUUGGG-GCCUUUGAGGGG
62	pyr-4157	Pbr033976.1	4	1141-1161	target 5' AUAGAAGAUUUUGAGGGAGGU 3'<br /> : :::: .::::::::::::<br />query 3' AACCUUCGGAAACUCCCUCCA 5'	-	-	-
63	pyr-401	Pbr022033.1	1.5	701-720	target 5' GAUGGGAGGAAUGGGGAAGA 3'<br /> .:::::::::::.:::::::<br />query 3' UUACCCUCCUUAUCCCUUCU 5'	1.5	0.99	UUACCCUCCUUAUCCCUUCU<br />o|||||||||||o|||||||<br />GAUGGGAGGAAUGGGGAAGA
64	pyr-novel-miR-131-3p	Pbr016259.1	4	104-124	target 5' UAGGGCCGAUCUCCUUUGGCA 3'<br /> .::::: . ::::::::::::<br />query 3' GUCCCGUUGAGAGGAAACCGU 5'	1.5	0.84	GUCCCGUUGAGAGGAAACCGU<br />o|||||||.||||||||||||<br />UAGGGCAAAUCUCCUUUGGCA
65	pyr-401	Pbr023183.1	2	585-604	target 5' AAUGGGAGGACUAGGGAAGA 3'<br /> :::::::::: :::::::::<br />query 3' UUACCCUCCUUAUCCCUUCU 5'	2	0.91	UUACCCUCCUUAUCCCUUCU<br />||||||||||.|||||||||<br />AAUGGGAGGACUAGGGAAGA
66	pyr-3166	Pbr016259.1	3.5	104-124	target 5' UAGGGCCGAUCUCCUUUGGCA 3'<br /> . :.:: .:::::::::::::<br />query 3' GGCUCGUUUAGAGGAAACCGU 5'	2	0.82	GGCUCGUUUAGAGGAAACCGU<br />o.|o|||||||||||||||||<br />UAGGGCAAAUCUCCUUUGGCA
67	pyr-1983	Pbr020911.1	2.5	1772-1791	target 5' ACAU-CUUUGCCUCUUCCCUG 3'<br /> ::: ::.:::::::::::::<br />query 3' GGUACGAGACGGAGAAGGGAC 5'	-	-	-
68	pyr-novel-miR-84-3p	Pbr022573.1	3.5	129-149	target 5' AGGUUCCACCAAACACUUCAA 3'<br /> .::::: :::::::::::: <br />query 3' CUCAAGGGGGUUUGUGAAGUC 5'	-	-	-
69	pyr-3809	Pbr028952.1	3.5	400-420	target 5' AACGGAAGCUCUCUUUUGGCA 3'<br /> :: :: :.:::::.:::::::<br />query 3' UUCCCGUUGAGAGGAAACCGU 5'	-	-	-
70	pyr-novel-miR-122-5p	Pbr011532.1	3.5	909-930	target 5' UGUUGAACUUAUUGCAACUGGC 3'<br /> .:::::::::::.:::::.::<br />query 3' CUAACUUGAAUAAUGUUGAUCG 5'	3.5	0.85	CUAACUUGAAUAAUGUUGAUCG<br />.o|||||||||||o|||||o||<br />UGUUGAACUUAUUGCAACUGGC
71	pyr-166	Pbr026726.1	3.5	1472-1493	target 5' UGGAUGUGAGGAAUGGGGAAGA 3'<br /> :.::: :::::::.:::::::<br />query 3' CCUUACCCUCCUUAUCCCUUCU 5'	3.5	0.72	CCUUACCCUCCUUAUCCCUUCU<br />.|o|||.|||||||o|||||||<br />UGGAUGUGAGGAAUGGGGAAGA
72	pyr-novel-miR-127-3p	Pbr019804.1	4	337-356	target 5' GA-GGGAGAAGAAGAGAGAGU 3'<br /> :: :. :::::::.::::::.<br />query 3' CUACUGUCUUCUUUUCUCUCG 5'	-	-	-
73	pyr-novel-miR-46-3p	Pbr032823.1	4	391-410	target 5' GAGAU-GCUCAAACACUUCAG 3'<br /> ::: : :.::::::::::::<br />query 3' CUCAAGGGGGUUUGUGAAGUC 5'	-	-	-
74	pyr-4860	Pbr027204.1	0	782-800	target 5' UGGAAGCCUUUGAGGGAGA 3'<br /> :::::::::::::::::::<br />query 3' ACCUUCGGAAACUCCCUCU 5'	0	1.00	ACCUUCGGAAACUCCCUCU<br />|||||||||||||||||||<br />UGGAAGCCUUUGAGGGAGA
75	pyr-3229	Pbr033147.1	4	995-1012	target 5' UUGUAAACCCGACGC-AAC 3'<br /> : :: :::::::::: :::<br />query 3' ACCACUUGGGCUGCGCUUG 5'	-	-	-
76	pyr-2781	Pbr001412.1	4	159-179	target 5' CAGGGAAACUCUCCUUUGGCU 3'<br /> ::::: :: ::::::::::: <br />query 3' GUCCCGUUAAGAGGAAACCGU 5'	3	0.77	GUCCCGUUAAGAGGAAACCGU<br />|||||.||.|||||||||||.<br />CAGGGAAACUCUCCUUUGGCU
77	pyr-2216	Pbr039312.1	1	199-219	target 5' GAGUUCACCCAAACACUUCAA 3'<br /> :::::: ::::::::::::::<br />query 3' CUCAAGGGGGUUUGUGAAGUU 5'	1	0.85	CUCAAGGGGGUUUGUGAAGUU<br />||||||.||||||||||||||<br />GAGUUCACCCAAACACUUCAA
78	pyr-1677	Pbr018332.1	0.5	231-251	target 5' AGGUGCAGGUGCAAAUGCAGG 3'<br /> ::::::::::::::::::::.<br />query 3' UCCACGUCCACGUUUACGUCU 5'	0.5	0.98	UCCACGUCCACGUUUACGUCU<br />||||||||||||||||||||o<br />AGGUGCAGGUGCAAAUGCAGG
79	pyr-1395	Pbr042146.1	4	1085-1102	target 5' GCGUAAUU-UCCUUUGGCG 3'<br /> : :.:::: :::::::::.<br />query 3' CCCGUUAAGAGGAAACCGU 5'	-	-	-
80	pyr-317	Pbr020535.1	3	2295-2313	target 5' UAGG-GAAGGUGCAAAUGCA 3'<br /> ::: : :::::::::::::<br />query 3' CUCCACGUCCACGUUUACGU 5'	-	-	-
81	pyr-novel-miR-34-3p	Pbr025044.1	3.5	2126-2145	target 5' UCGA-AAAAUCUCUUUUGGCA 3'<br /> .::: :::::::.:::::::<br />query 3' GGCUCGUUUAGAGGAAACCGU 5'	-	-	-
82	pyr-novel-miR-65-5p	Pbr018870.1	3.5	1629-1649	target 5' UAUUUCAGAGGAGAUUUGCAU 3'<br /> : : .::.::::::::::::.<br />query 3' AGACGGUUUCCUCUAAACGUG 5'	-	-	-
83	pyr-518	Pbr009838.5	3.5	544-565	target 5' GGGAUGGGUGGCAUAGGUAAGA 3'<br /> ::.::::: :::::::: ::::<br />query 3' CCUUACCCUCCGUAUCCCUUCU 5'	3.5	0.78	CCUUACCCUCCGUAUCCCUUCU<br />||o|||||.||||||||.||||<br />GGGAUGGGUGGCAUAGGUAAGA
84	pyr-4017	Pbr039462.1	4	789-810	target 5' GGAAUGGGUGGAAUUGGCAAGU 3'<br /> :::::::: :::::::: ::: <br />query 3' CCUUACCCUCCUUAACCUUUCU 5'	-	-	-
85	pyr-novel-miR-79-5p	Pbr019231.1	-	-	-	3		AGACGGUUUCCUCUUAACGUG<br />||||||..||||||||||||.<br />UCUGCC--AGGAGAAUUGCAG
86	pyr-novel-miR-127-3p	Pbr001531.1	3.5	355-375	target 5' GAGGAGGGAAGAAAAGAGAGA 3'<br /> :: :: .::::::::::::: <br />query 3' CUACUGUCUUCUUUUCUCUCG 5'	3.5	0.78	CUACUGUCUUCUUUUCUCUCG<br />||.||.o|||||||||||||.<br />GAGGAGGGAAGAAAAGAGAGA
87	pyr-novel-miR-117-3p	Pbr032823.1	4	391-410	target 5' GAGAU-GCUCAAACACUUCAG 3'<br /> ::: : :.::::::::::::<br />query 3' CUCAAGGGGGUUUGUGAAGUC 5'	-	-	-
88	pyr-4860	Pbr021904.1	4	275-293	target 5' GGGAAGCCUUUGAGGAAGC 3'<br /> :::::::::::::: :: <br />query 3' ACCUUCGGAAACUCCCUCU 5'	-	-	-
89	pyr-4218	Pbr033976.1	4	1142-1161	target 5' UAGAAGAUUUUGAGGGAGGU 3'<br /> : :::: .::::::::::.:<br />query 3' ACCUUCGGAAACUCCCUCUA 5'	-	-	-
90	pyr-novel-miR-127-3p	Pbr029065.2	3	456-475	target 5' GGUGGCA-AAGAAGAGAGAGC 3'<br /> :.::.:: :::::.:::::::<br />query 3' CUACUGUCUUCUUUUCUCUCG 5'	-	-	-
91	pyr-novel-miR-117-3p	Pbr018861.1	3.5	391-411	target 5' GAGUUCCUCCAAACUCUUCAU 3'<br /> :::::::.:::::: ::::: <br />query 3' CUCAAGGGGGUUUGUGAAGUC 5'	3.5	0.81	CUCAAGGGGGUUUGUGAAGUC<br />|||||||o||||||.|||||.<br />GAGUUCCUCCAAACUCUUCAU
92	pyr-401	Pbr008910.2	1.5	962-981	target 5' GAUGGGAGGAAUGGGGAAGA 3'<br /> .:::::::::::.:::::::<br />query 3' UUACCCUCCUUAUCCCUUCU 5'	1.5	0.99	UUACCCUCCUUAUCCCUUCU<br />o|||||||||||o|||||||<br />GAUGGGAGGAAUGGGGAAGA
93	pyr-4218	Pbr036939.1	1	791-810	target 5' UGGAAGCCUUUGAGGGAGAG 3'<br /> ::::::::::::::::::: <br />query 3' ACCUUCGGAAACUCCCUCUA 5'	1	1.00	ACCUUCGGAAACUCCCUCUA<br />|||||||||||||||||||.<br />UGGAAGCCUUUGAGGGAGAG
94	pyr-4860	Pbr010616.1	4	2282-2299	target 5' UGAAAG-UUUUGAGGGAGA 3'<br /> :: ::: .:::::::::::<br />query 3' ACCUUCGGAAACUCCCUCU 5'	-	-	-
95	pyr-novel-miR-30-3p	Pbr004109.1	4	670-690	target 5' GGCUGCAGAAGAAAAGAGGGC 3'<br /> :. .:::::::::::::.::<br />query 3' CUACUGUCUUCUUUUCUCUCG 5'	-	-	-
96	pyr-166	Pbr006646.1	2	643-664	target 5' GGAAUGGGCGGAAUGGGGAAGA 3'<br /> :::::::: :::::.:::::::<br />query 3' CCUUACCCUCCUUAUCCCUUCU 5'	2	0.91	CCUUACCCUCCUUAUCCCUUCU<br />||||||||.|||||o|||||||<br />GGAAUGGGCGGAAUGGGGAAGA
97	pyr-401	Pbr039222.1	4	585-604	target 5' CAUGGGAGGACUGGGGAAGA 3'<br /> ::::::::: :.:::::::<br />query 3' UUACCCUCCUUAUCCCUUCU 5'	-	-	-
98	pyr-2609	Pbr034120.1	4	2216-2235	target 5' GAGAU-AUGUUGGCAUCUUCA 3'<br /> ::::: :::.::::: :::::<br />query 3' CUCUAGUACGACCGUCGAAGU 5'	-	-	-
99	pyr-novel-miR-84-3p	Pbr039312.1	2	199-219	target 5' GAGUUCACCCAAACACUUCAA 3'<br /> :::::: ::::::::::::: <br />query 3' CUCAAGGGGGUUUGUGAAGUC 5'	2	0.81	CUCAAGGGGGUUUGUGAAGUC<br />||||||.|||||||||||||.<br />GAGUUCACCCAAACACUUCAA
100	pyr-novel-miR-30-3p	Pbr030803.1	4	165-184	target 5' GAUGA-AGAAGAAGAGAGGGA 3'<br /> ::::: :::::::.::::.: <br />query 3' CUACUGUCUUCUUUUCUCUCG 5'	-	-	-
101	pyr-1613	Pbr015248.1	4	1252-1272	target 5' UGGGAAGUCAUCCUCGGCUCA 3'<br /> :: :::::::::: ::::::<br />query 3' UCCGUUCAGUAGGAACCGAGU 5'	2	0.82	UCCGUUCAGUAGGAACCGAGU<br />.||.|||||||||||||||||<br />CGGGAAGUCAUCCUUGGCUCA
102	pyr-4218	Pbr010616.1	4	2282-2300	target 5' UGAAAG-UUUUGAGGGAGAA 3'<br /> :: ::: .::::::::::: <br />query 3' ACCUUCGGAAACUCCCUCUA 5'	-	-	-
103	pyr-4034	Pbr011465.1	3.5	37-56	target 5' ACCGGUCACCUGAGAACACG 3'<br /> : ::: ::::::::::::.<br />query 3' UCCCCACUGGACUCUUGUGU 5'	-	-	-
104	pyr-166	Pbr003529.1	3	765-786	target 5' GGUAUUGGUGGAAUAGGGAAGA 3'<br /> :: :: :: :::::::::::::<br />query 3' CCUUACCCUCCUUAUCCCUUCU 5'	-	-	-
105	pyr-novel-miR-30-3p	Pbr006411.1	4	1130-1150	target 5' AUUCCCAGAAGAAAAGAGAGC 3'<br /> : ::::::::::::::::<br />query 3' CUACUGUCUUCUUUUCUCUCG 5'	-	-	-
106	pyr-1677	Pbr017933.1	4	1373-1393	target 5' AUAUGCAGAUGCAAAUGCAGA 3'<br /> : ::::: ::::::::::::<br />query 3' UCCACGUCCACGUUUACGUCU 5'	-	-	-
107	pyr-166	Pbr027824.1	4	1208-1230	target 5' GGAAGGGGAAGGAAUCGGGAAGA 3'<br /> :::: ::: :::::: :::::::<br />query 3' CCUUACCC-UCCUUAUCCCUUCU 5'	-	-	-
108	pyr-novel-miR-30-3p	Pbr011966.1	4	164-185	target 5' GAUGGCAGGAGAAAAGGGAAGC 3'<br /> ::::.:::.:::::::.: :::<br />query 3' CUACUGUCUUCUUUUCUC-UCG 5'	-	-	-
109	pyr-4614	Pbr036939.1	2	786-807	target 5' AAUAUUGGAAGCCUUUGAGGGA 3'<br /> :::::::: ::::.::::::::<br />query 3' UUAUAACCCUCGGGAACUCCCU 5'	2	0.81	UUAUAACCCUCGGGAACUCCCU<br />||||||||.||||o||||||||<br />AAUAUUGGAAGCCUUUGAGGGA
110	pyr-401	Pbr003792.1	4	664-683	target 5' AAUGGGAGGCAUAGGCAAGA 3'<br /> ::::::::: ::::: ::::<br />query 3' UUACCCUCCUUAUCCCUUCU 5'	-	-	-
111	pyr-4860	Pbr025905.1	3.5	2076-2094	target 5' UGGAAGUCUUUCAGGGAGG 3'<br /> ::::::.:::: ::::::.<br />query 3' ACCUUCGGAAACUCCCUCU 5'	3	0.78	ACCUUCGGAAACUCCCUCU<br />||||||o||||.||||||o<br />UGGAAGUCUUUCAGGGAGG
112	pyr-1557	Pbr034014.5	3	928-948	target 5' GGUUUCCUCCAAACACUUCAA 3'<br /> :. ::::.:::::::::::: <br />query 3' CUCAAGGGGGUUUGUGAAGUG 5'	3	0.76	CUCAAGGGGGUUUGUGAAGUG<br />|o.||||o||||||||||||.<br />GGUUUCCUCCAAACACUUCAA
113	pyr-novel-miR-117-3p	Pbr004737.1	1.5	795-815	target 5' GAGUUCCUCCAAACACUUCAU 3'<br /> :::::::.:::::::::::: <br />query 3' CUCAAGGGGGUUUGUGAAGUC 5'	1.5	0.89	CUCAAGGGGGUUUGUGAAGUC<br />|||||||o||||||||||||.<br />GAGUUCCUCCAAACACUUCAU
114	pyr-401	Pbr035531.1	4	3336-3355	target 5' AAUGGGAAGAAGAGGGAAGA 3'<br /> ::::::: ::: ::::::::<br />query 3' UUACCCUCCUUAUCCCUUCU 5'	3	0.76	UUACCCUCCUUAUCCCUUCU<br />|||||||.|||.||||||||<br />AAUGGGAAGAAGAGGGAAGA
115	pyr-4860	Pbr000734.1	4	704-722	target 5' AAGGAGUCUUUGAGGGAGG 3'<br /> :.::.:::::::::::.<br />query 3' ACCUUCGGAAACUCCCUCU 5'	-	-	-
116	pyr-4860	Pbr005446.1	3.5	41-58	target 5' UAGGAGCC-UUGAGGGAGA 3'<br /> : :.:::: ::::::::::<br />query 3' ACCUUCGGAAACUCCCUCU 5'	-	-	-
117	pyr-novel-miR-144-3p	Pbr028952.1	3.5	400-420	target 5' AACGGAAGCUCUCUUUUGGCA 3'<br /> :: :: :.:::::.:::::::<br />query 3' UUCCCGUUGAGAGGAAACCGU 5'	-	-	-
118	pyr-4860	Pbr035826.1	4	346-363	target 5' UGGAAGCCAUUGA-GGAGA 3'<br /> :::::::: :::: :::::<br />query 3' ACCUUCGGAAACUCCCUCU 5'	-	-	-
119	pyr-4249	Pbr007786.1	3	340-361	target 5' CUGGAUGCAGAGGUGUUAUCGA 3'<br /> :::::::::::::. :::::::<br />query 3' GACCUACGUCUCCG-AAUAGCU 5'	-	-	-
120	pyr-novel-miR-46-3p	Pbr003032.1	3.5	13-33	target 5' GAGUUCCUCCAAACUCUUCAU 3'<br /> :::::::.:::::: ::::: <br />query 3' CUCAAGGGGGUUUGUGAAGUC 5'	3.5	0.81	CUCAAGGGGGUUUGUGAAGUC<br />|||||||o||||||.|||||.<br />GAGUUCCUCCAAACUCUUCAU
121	pyr-401	Pbr003354.1	-	-	-	3		UUACCCU-CCUUAUCCCUUCU<br />|||||.|.||||||||||||.<br />AAUGGCAUGGAAUAGGGAAG
122	pyr-novel-miR-157-3p	Pbr008878.1	4	2110-2131	target 5' AAGCUAGUAUGUAAUGAGUUCA 3'<br /> :::::::: ::.:::.::::: <br />query 3' UUCGAUCA-ACGUUAUUCAAGC 5'	-	-	-
123	pyr-novel-miR-65-5p	Pbr012394.1	3.5	75-95	target 5' UUUGCCAAACGAGAUUUGCGC 3'<br /> :.::::::: :::::::::.:<br />query 3' AGACGGUUUCCUCUAAACGUG 5'	3.5	0.80	AGACGGUUUCCUCUAAACGUG<br />|o|||||||.|||||||||o|<br />UUUGCCAAACGAGAUUUGCGC
124	pyr-novel-miR-127-3p	Pbr006411.1	4	1130-1150	target 5' AUUCCCAGAAGAAAAGAGAGC 3'<br /> : ::::::::::::::::<br />query 3' CUACUGUCUUCUUUUCUCUCG 5'	-	-	-
125	pyr-1804	Pbr006390.1	4	969-990	target 5' GGGUAGAUUCUCCUUUGGGAGG 3'<br /> :::.: :::::::::::: ::.<br />query 3' CCCGU-UAAGAGGAAACCGUCU 5'	-	-	-
126	pyr-novel-miR-49-3p	Pbr016259.1	4	329-350	target 5' UAGGGCAAAUCUCCUUUGGCAU 3'<br /> . :.::: ::::::::::::: <br />query 3' GACUCGUCUAGAGGAAACCGUC 5'	-	-	-
127	pyr-novel-miR-84-3p	Pbr009275.1	4	256-276	target 5' GGGUUUCGCCAAACGCUUCAU 3'<br /> :.:::.: ::::::.::::: <br />query 3' CUCAAGGGGGUUUGUGAAGUC 5'	-	-	-
128	pyr-4693	Pbr021475.1	3	142-162	target 5' AAGCUAGUUGCGGUAAGUUCA 3'<br /> :::::::::::..::::::: <br />query 3' UUCGAUCAACGUUAUUCAAGC 5'	3	0.95	UUCGAUCAACGUUAUUCAAGC<br />|||||||||||oo|||||||.<br />AAGCUAGUUGCGGUAAGUUCA
129	pyr-novel-miR-79-5p	Pbr030211.1	4	888-908	target 5' UCUGUCCAAGGAGAAUUACAU 3'<br /> ::::.: :::::::::: ::.<br />query 3' AGACGGUUUCCUCUUAACGUG 5'	-	-	-
130	pyr-1557	Pbr015336.1	4	658-678	target 5' GAGUUCCUCCAAGCUCUUCAU 3'<br /> :::::::.::::.: :::::.<br />query 3' CUCAAGGGGGUUUGUGAAGUG 5'	-	-	-
131	pyr-novel-miR-46-3p	Pbr004737.1	1.5	795-815	target 5' GAGUUCCUCCAAACACUUCAU 3'<br /> :::::::.:::::::::::: <br />query 3' CUCAAGGGGGUUUGUGAAGUC 5'	1.5	0.89	CUCAAGGGGGUUUGUGAAGUC<br />|||||||o||||||||||||.<br />GAGUUCCUCCAAACACUUCAU
132	pyr-4860	Pbr032574.1	4	2402-2420	target 5' UGGUAGCCGUUGGGGGAGA 3'<br /> ::: :::: :::.::::::<br />query 3' ACCUUCGGAAACUCCCUCU 5'	-	-	-
133	pyr-novel-miR-79-5p	Pbr042057.1	4	1191-1211	target 5' GUUGCAGAAGGAGAAUUGUAC 3'<br /> .::: .:::::::::::.::<br />query 3' AGACGGUUUCCUCUUAACGUG 5'	-	-	-
134	pyr-317	Pbr011776.1	1	230-249	target 5' CAGGUGCAGGUGCAAAUGCA 3'<br /> :::::::::::::::::::<br />query 3' CUCCACGUCCACGUUUACGU 5'	1	0.87	CUCCACGUCCACGUUUACGU<br />.|||||||||||||||||||<br />CAGGUGCAGGUGCAAAUGCA
135	pyr-novel-miR-84-3p	Pbr004737.1	1.5	795-815	target 5' GAGUUCCUCCAAACACUUCAU 3'<br /> :::::::.:::::::::::: <br />query 3' CUCAAGGGGGUUUGUGAAGUC 5'	1.5	0.89	CUCAAGGGGGUUUGUGAAGUC<br />|||||||o||||||||||||.<br />GAGUUCCUCCAAACACUUCAU
136	pyr-4017	Pbr040311.1	4	754-775	target 5' GGUAUGGGUGGUAUUGGAAAGA 3'<br /> :: ::::: :: ::::::::::<br />query 3' CCUUACCCUCCUUAACCUUUCU 5'	-	-	-
137	pyr-4017	Pbr012662.1	3.5	770-791	target 5' GGGAUGGGUGGAAUUGGCAAGA 3'<br /> ::.::::: :::::::: ::::<br />query 3' CCUUACCCUCCUUAACCUUUCU 5'	3.5	0.80	CCUUACCCUCCUUAACCUUUCU<br />||o|||||.||||||||.||||<br />GGGAUGGGUGGAAUUGGCAAGA
138	pyr-1395	Pbr010859.2	4	1796-1814	target 5' GUGUAAUUCUUCUUUGGUG 3'<br /> : :.::::::.::::::..<br />query 3' CCCGUUAAGAGGAAACCGU 5'	-	-	-
139	pyr-novel-miR-144-5p	Pbr020957.1	4	398-418	target 5' CCAACCAAUGGAGAGAAGCCA 3'<br /> :: ::: :::::::::::: <br />query 3' GGACGGUGACCUCUCUUCGGG 5'	-	-	-
140	pyr-166	Pbr004599.1	4	697-718	target 5' GGAAUGGGAGGCAUAGGCAAGA 3'<br /> ::::::::::: ::::: ::::<br />query 3' CCUUACCCUCCUUAUCCCUUCU 5'	-	-	-
141	pyr-518	Pbr003797.1	2	10307-10328	target 5' GGAAUGGGAGGCAUAGGCAAGA 3'<br /> ::::::::::::::::: ::::<br />query 3' CCUUACCCUCCGUAUCCCUUCU 5'	2	0.87	CCUUACCCUCCGUAUCCCUUCU<br />|||||||||||||||||.||||<br />GGAAUGGGAGGCAUAGGCAAGA
142	pyr-4017	Pbr033274.1	2	796-817	target 5' GGAAUGGGUGGGAUUGGAAAGA 3'<br /> :::::::: ::.::::::::::<br />query 3' CCUUACCCUCCUUAACCUUUCU 5'	2	0.90	CCUUACCCUCCUUAACCUUUCU<br />||||||||.||o||||||||||<br />GGAAUGGGUGGGAUUGGAAAGA
143	pyr-3417	Pbr017220.1	3	2237-2257	target 5' GCGGCAAUUCAUUCUUGGCUG 3'<br /> :::::: ::::.::::::::<br />query 3' GGCCGUUUAGUAGGAACCGAC 5'	3	0.79	GGCCGUUUAGUAGGAACCGAC<br />.||||||.||||o||||||||<br />GCGGCAAUUCAUUCUUGGCUG
144	pyr-401	Pbr027824.1	4	1210-1230	target 5' AAGGGGAAGGAAUCGGGAAGA 3'<br /> :: ::: :::::: :::::::<br />query 3' UUACCC-UCCUUAUCCCUUCU 5'	-	-	-
145	pyr-518	Pbr036417.1	2.5	3127-3148	target 5' GGGAUGGGAGGAAUAGGGAAGA 3'<br /> ::.:::::::: ::::::::::<br />query 3' CCUUACCCUCCGUAUCCCUUCU 5'	2.5	0.86	CCUUACCCUCCGUAUCCCUUCU<br />||o||||||||.||||||||||<br />GGGAUGGGAGGAAUAGGGAAGA
146	pyr-novel-miR-107-5p	Pbr035746.1	4	13-35	target 5' UCCCUUCCUCUGGCUAAGUCUUC 3'<br /> :: ::::: :::::::::::: <br />query 3' CGGAAAGGA-ACCGAUUCAGAAA 5'	-	-	-
147	pyr-2216	Pbr020839.1	2	979-999	target 5' GGUUUCCUCCAAACACUUCAA 3'<br /> :. ::::.:::::::::::::<br />query 3' CUCAAGGGGGUUUGUGAAGUU 5'	2	0.78	CUCAAGGGGGUUUGUGAAGUU<br />|o.||||o|||||||||||||<br />GGUUUCCUCCAAACACUUCAA
148	pyr-4011	Pbr018761.1	3.5	352-372	target 5' GAGUUUCUCCAAACACUUCAU 3'<br /> : ::..:.:::::::::::: <br />query 3' CCCAGGGGGGUUUGUGAAGUC 5'	-	-	-
149	pyr-89	Pbr015336.1	3.5	658-678	target 5' GAGUUCCUCCAAGCUCUUCAU 3'<br /> :::::::.::::.: ::::::<br />query 3' CUCAAGGGGGUUUGUGAAGUA 5'	3.5	0.85	CUCAAGGGGGUUUGUGAAGUA<br />|||||||o||||o|.||||||<br />GAGUUCCUCCAAGCUCUUCAU
150	pyr-166	Pbr022039.1	1.5	646-667	target 5' GGGAUGGGAGGAAUGGGGAAGA 3'<br /> ::.:::::::::::.:::::::<br />query 3' CCUUACCCUCCUUAUCCCUUCU 5'	1.5	0.98	CCUUACCCUCCUUAUCCCUUCU<br />||o|||||||||||o|||||||<br />GGGAUGGGAGGAAUGGGGAAGA
151	pyr-1557	Pbr004737.1	1	795-815	target 5' GAGUUCCUCCAAACACUUCAU 3'<br /> :::::::.::::::::::::.<br />query 3' CUCAAGGGGGUUUGUGAAGUG 5'	1	0.91	CUCAAGGGGGUUUGUGAAGUG<br />|||||||o||||||||||||o<br />GAGUUCCUCCAAACACUUCAU
152	pyr-401	Pbr022039.1	1.5	648-667	target 5' GAUGGGAGGAAUGGGGAAGA 3'<br /> .:::::::::::.:::::::<br />query 3' UUACCCUCCUUAUCCCUUCU 5'	1.5	0.99	UUACCCUCCUUAUCCCUUCU<br />o|||||||||||o|||||||<br />GAUGGGAGGAAUGGGGAAGA
153	pyr-166	Pbr004600.1	4	1183-1204	target 5' GGAAUGGGAGGCAUAGGCAAGA 3'<br /> ::::::::::: ::::: ::::<br />query 3' CCUUACCCUCCUUAUCCCUUCU 5'	-	-	-
154	pyr-novel-miR-9-3p	Pbr020213.2	4	294-314	target 5' GUUCGAGAAGGCGAGCGCGUG 3'<br /> ::: ::::::: ::::.::::<br />query 3' CAACCUCUUCCCCUCGUGCAC 5'	-	-	-
155	pyr-1677	Pbr012578.1	-	-	-	3		UCCACGUC--CACGUUUACGUCU<br />||||||||...||||||||||||<br />AGGUGCAGCCUUGCAAAUGCAGA
156	pyr-novel-miR-30-3p	Pbr003141.1	4	842-861	target 5' GA-GAGAGAAGAGAAGAGAGA 3'<br /> :: :: ::::::.::::::: <br />query 3' CUACUGUCUUCUUUUCUCUCG 5'	-	-	-
157	pyr-518	Pbr019924.1	3.5	631-652	target 5' GGGAUGGGAGGAAUGGGGAAGA 3'<br /> ::.:::::::: ::.:::::::<br />query 3' CCUUACCCUCCGUAUCCCUUCU 5'	3.5	0.86	CCUUACCCUCCGUAUCCCUUCU<br />||o||||||||.||o|||||||<br />GGGAUGGGAGGAAUGGGGAAGA
158	pyr-630	Pbr025355.1	3.5	3111-3131	target 5' CAGGCCAGCUCUUCUUUGGCU 3'<br /> :::: ::.::::.::::::: <br />query 3' GUCCCGUUGAGAGGAAACCGU 5'	3.5	0.79	GUCCCGUUGAGAGGAAACCGU<br />||||.||o||||o|||||||.<br />CAGGCCAGCUCUUCUUUGGCU
159	pyr-401	Pbr026726.1	2.5	1474-1493	target 5' GAUGUGAGGAAUGGGGAAGA 3'<br /> .::: :::::::.:::::::<br />query 3' UUACCCUCCUUAUCCCUUCU 5'	2.5	0.83	UUACCCUCCUUAUCCCUUCU<br />o|||.|||||||o|||||||<br />GAUGUGAGGAAUGGGGAAGA
160	pyr-4157	Pbr013109.1	4	181-201	target 5' UGGGAAGCUUUUGGGGGAGGA 3'<br /> : ::::::.::::.:::::: <br />query 3' AACCUUCGGAAACUCCCUCCA 5'	3.5	0.84	AACCUUCGGAAACUCCCUCCA<br />|.||||||o||||o||||||.<br />UGGGAAGCUUUUGGGGGAGGA
161	pyr-166	Pbr013012.1	4	625-646	target 5' GGGAUGGGGGGAAUGGGAAAGA 3'<br /> ::.:::::.:::::.:: ::::<br />query 3' CCUUACCCUCCUUAUCCCUUCU 5'	-	-	-
162	pyr-518	Pbr023185.1	4	466-487	target 5' GGAAUGGGAGGACUAGGGAAGA 3'<br /> ::::::::::: :::::::::<br />query 3' CCUUACCCUCCGUAUCCCUUCU 5'	-	-	-
163	pyr-novel-miR-18-3p	Pbr030937.1	4	1365-1384	target 5' AAG-UAGUUCCGAUAAGUUCA 3'<br /> ::: ::::: :.:::::::::<br />query 3' UUCGAUCAACGUUAUUCAAGU 5'	-	-	-
164	pyr-novel-miR-79-5p	Pbr017388.1	4	888-908	target 5' UCUGUCCAAGGAGAAUUACAU 3'<br /> ::::.: :::::::::: ::.<br />query 3' AGACGGUUUCCUCUUAACGUG 5'	-	-	-
165	pyr-753	Pbr034047.1	3.5	51-71	target 5' UUUCGCGUCGGACGACAUUCU 3'<br /> :.::: ..:.:::::::::::<br />query 3' AGAGCUUGGUCUGCUGUAAGA 5'	-	-	-
166	pyr-401	Pbr016325.1	3	878-897	target 5' AAUGGGAGGAAUGGGGAAAA 3'<br /> ::::::::::::.::::: :<br />query 3' UUACCCUCCUUAUCCCUUCU 5'	3	0.91	UUACCCUCCUUAUCCCUUCU<br />||||||||||||o|||||.|<br />AAUGGGAGGAAUGGGGAAAA
167	pyr-novel-miR-79-3p	Pbr020849.1	4	355-374	target 5' CAGGGCAA-UCUCUUUUGGCC 3'<br /> :::::::: ::::.:::::: <br />query 3' GUCCCGUUAAGAGGAAACCGU 5'	-	-	-
168	pyr-1677	Pbr038389.1	3.5	651-671	target 5' UGGUGCAAGUGCAAGUGCAGG 3'<br /> :::::: ::::::.:::::.<br />query 3' UCCACGUCCACGUUUACGUCU 5'	3.5	0.76	UCCACGUCCACGUUUACGUCU<br />.||||||.||||||o|||||o<br />UGGUGCAAGUGCAAGUGCAGG
169	pyr-630	Pbr002903.1	2	248-268	target 5' CAGGGCAACUCUUCUUUGGCU 3'<br /> ::::::::::::.::::::: <br />query 3' GUCCCGUUGAGAGGAAACCGU 5'	2	0.93	GUCCCGUUGAGAGGAAACCGU<br />||||||||||||o|||||||.<br />CAGGGCAACUCUUCUUUGGCU
170	pyr-2216	Pbr018761.1	2	352-372	target 5' GAGUUUCUCCAAACACUUCAU 3'<br /> :::::.:.:::::::::::: <br />query 3' CUCAAGGGGGUUUGUGAAGUU 5'	2	0.86	CUCAAGGGGGUUUGUGAAGUU<br />|||||o|o||||||||||||.<br />GAGUUUCUCCAAACACUUCAU
171	pyr-novel-miR-18-3p	Pbr008878.1	3	2110-2131	target 5' AAGCUAGUAUGUAAUGAGUUCA 3'<br /> :::::::: ::.:::.::::::<br />query 3' UUCGAUCA-ACGUUAUUCAAGU 5'	-	-	-
172	pyr-novel-miR-127-3p	Pbr021943.1	4	189-209	target 5' GGAGGAAGAAGAGAAGAGAGC 3'<br /> :. :. ::::::.::::::::<br />query 3' CUACUGUCUUCUUUUCUCUCG 5'	-	-	-
173	pyr-1804	Pbr006253.1	4	215-236	target 5' CAACAAUUGCUCCUUUGGCAGA 3'<br /> ::::: :::::::::::::<br />query 3' CCCGUUAA-GAGGAAACCGUCU 5'	-	-	-
174	pyr-novel-miR-49-3p	Pbr029864.1	3.5	1505-1525	target 5' CUGAUCAGGU-UCCUUUGGCAG 3'<br /> :::: :::.: :::::::::::<br />query 3' GACUCGUCUAGAGGAAACCGUC 5'	-	-	-
175	pyr-3809	Pbr018935.1	4	393-413	target 5' AAGGGGAACUCUCUUCUGGCA 3'<br /> ::::: :::::::.: :::::<br />query 3' UUCCCGUUGAGAGGAAACCGU 5'	-	-	-
176	pyr-4860	Pbr041205.1	4	681-700	target 5' UUGAAGCCUUUGAAGGGGGA 3'<br /> : :::::::::: ::::.::<br />query 3' ACCUUCGGAAAC-UCCCUCU 5'	-	-	-
177	pyr-401	Pbr004600.1	4	1185-1204	target 5' AAUGGGAGGCAUAGGCAAGA 3'<br /> ::::::::: ::::: ::::<br />query 3' UUACCCUCCUUAUCCCUUCU 5'	-	-	-
178	pyr-4017	Pbr033273.1	2	799-820	target 5' GGAAUGGGUGGGAUUGGAAAGA 3'<br /> :::::::: ::.::::::::::<br />query 3' CCUUACCCUCCUUAACCUUUCU 5'	2	0.90	CCUUACCCUCCUUAACCUUUCU<br />||||||||.||o||||||||||<br />GGAAUGGGUGGGAUUGGAAAGA
179	pyr-89	Pbr039312.1	2	199-219	target 5' GAGUUCACCCAAACACUUCAA 3'<br /> :::::: ::::::::::::: <br />query 3' CUCAAGGGGGUUUGUGAAGUA 5'	2	0.85	CUCAAGGGGGUUUGUGAAGUA<br />||||||.|||||||||||||.<br />GAGUUCACCCAAACACUUCAA
180	pyr-317	Pbr016270.1	4	469-489	target 5' GAGCUGCAGGUGCAAAUAGCU 3'<br /> ::: ::::::::::::: :: <br />query 3' CUCCACGUCCACGUUUA-CGU 5'	-	-	-
181	pyr-4017	Pbr023278.1	4	580-601	target 5' GGUAUUGGAGGAAUUGGUAAGA 3'<br /> :: :: ::::::::::: ::::<br />query 3' CCUUACCCUCCUUAACCUUUCU 5'	-	-	-
182	pyr-1983	Pbr035112.1	3.5	110-130	target 5' CCGUUCUCUGCCUCUUCUCUU 3'<br /> ::.: ::::::::::::.:: <br />query 3' GGUACGAGACGGAGAAGGGAC 5'	3.5	0.78	GGUACGAGACGGAGAAGGGAC<br />||o|.||||||||||||o||.<br />CCGUUCUCUGCCUCUUCUCUU
183	pyr-1983	Pbr009665.2	4	182-201	target 5' CCAU-CGCUGCUUCUUCUCUG 3'<br /> :::: : ::::.:::::.:::<br />query 3' GGUACGAGACGGAGAAGGGAC 5'	-	-	-
184	pyr-novel-miR-144-5p	Pbr013751.1	4	7192-7213	target 5' UCUUCUACAUGGAGAGGAGCCC 3'<br /> .:: :.:: :::::::.:::::<br />query 3' GGACGGUG-ACCUCUCUUCGGG 5'	-	-	-
185	pyr-novel-miR-131-3p	Pbr025355.1	3.5	3111-3131	target 5' CAGGCCAGCUCUUCUUUGGCU 3'<br /> :::: ::.::::.::::::: <br />query 3' GUCCCGUUGAGAGGAAACCGU 5'	3.5	0.79	GUCCCGUUGAGAGGAAACCGU<br />||||.||o||||o|||||||.<br />CAGGCCAGCUCUUCUUUGGCU
186	pyr-401	Pbr006646.1	2	645-664	target 5' AAUGGGCGGAAUGGGGAAGA 3'<br /> :::::: :::::.:::::::<br />query 3' UUACCCUCCUUAUCCCUUCU 5'	2	0.89	UUACCCUCCUUAUCCCUUCU<br />||||||.|||||o|||||||<br />AAUGGGCGGAAUGGGGAAGA
187	pyr-518	Pbr021959.1	4	535-556	target 5' GGUAUUGGAGGCGUGGGGAAGA 3'<br /> :: :: ::::::.:.:::::::<br />query 3' CCUUACCCUCCGUAUCCCUUCU 5'	-	-	-
188	pyr-401	Pbr018393.1	4	673-692	target 5' AAUGGAAGGGAUAGUGAAGA 3'<br /> ::::: :::.:::: :::::<br />query 3' UUACCCUCCUUAUCCCUUCU 5'	-	-	-
189	pyr-2216	Pbr040385.1	4	1635-1654	target 5' GUAUUCCCCCAAAC-CUUCAA 3'<br /> : ::::::::::: ::::::<br />query 3' CUCAAGGGGGUUUGUGAAGUU 5'	-	-	-
190	pyr-novel-miR-124-3p	Pbr003037.1	4	6278-6301	target 5' UCCUCUCCUGAGCUAAUGGAGAGG 3'<br /> :: :::::::::::::::::.: :<br />query 3' AGAAGAGGACUCGAUUACCUUUAC 5'	-	-	-
191	pyr-518	Pbr003798.1	3	814-835	target 5' GGAAUGGGCGGCAUAGGCAAGA 3'<br /> :::::::: :::::::: ::::<br />query 3' CCUUACCCUCCGUAUCCCUUCU 5'	3	0.79	CCUUACCCUCCGUAUCCCUUCU<br />||||||||.||||||||.||||<br />GGAAUGGGCGGCAUAGGCAAGA
192	pyr-1395	Pbr042142.1	4	977-994	target 5' GCGUAAUU-UCCUUUGGCG 3'<br /> : :.:::: :::::::::.<br />query 3' CCCGUUAAGAGGAAACCGU 5'	-	-	-
193	pyr-2216	Pbr018861.1	3.5	391-411	target 5' GAGUUCCUCCAAACUCUUCAU 3'<br /> :::::::.:::::: ::::: <br />query 3' CUCAAGGGGGUUUGUGAAGUU 5'	3.5	0.84	CUCAAGGGGGUUUGUGAAGUU<br />|||||||o||||||.|||||.<br />GAGUUCCUCCAAACUCUUCAU
194	pyr-novel-miR-84-3p	Pbr014657.1	3.5	678-698	target 5' GAGUUCCUCCAAACUCUUCAU 3'<br /> :::::::.:::::: ::::: <br />query 3' CUCAAGGGGGUUUGUGAAGUC 5'	3.5	0.81	CUCAAGGGGGUUUGUGAAGUC<br />|||||||o||||||.|||||.<br />GAGUUCCUCCAAACUCUUCAU
195	pyr-4860	Pbr012906.1	3	458-475	target 5' UGGGA-UCUUUGAGGGAGG 3'<br /> :::.: .:::::::::::.<br />query 3' ACCUUCGGAAACUCCCUCU 5'	-	-	-
196	pyr-166	Pbr035743.1	4	1912-1934	target 5' GUGGUGGUGAGGAAUGGGGAAGA 3'<br /> : ..::: :::::::.:::::::<br />query 3' CCUUACC-CUCCUUAUCCCUUCU 5'	-	-	-
197	pyr-4017	Pbr023981.1	2	799-820	target 5' GGAAUGGGUGGGAUUGGAAAGA 3'<br /> :::::::: ::.::::::::::<br />query 3' CCUUACCCUCCUUAACCUUUCU 5'	2	0.90	CCUUACCCUCCUUAACCUUUCU<br />||||||||.||o||||||||||<br />GGAAUGGGUGGGAUUGGAAAGA
198	pyr-novel-miR-18-3p	Pbr010587.1	3.5	1946-1965	target 5' AAGCUGGUUGCAA-GAGUUCA 3'<br /> :::::.::::::: .::::::<br />query 3' UUCGAUCAACGUUAUUCAAGU 5'	3.5	0.87	UUCGAUCAACGUUAUUCAAGU<br />|||||o|||||||.o||||||<br />AAGCUGGUUGCAA-GAGUUCA
199	pyr-1395	Pbr002903.1	4	250-268	target 5' GGGCAACUCUUCUUUGGCU 3'<br /> :::::: :::.::::::: <br />query 3' CCCGUUAAGAGGAAACCGU 5'	3	0.83	CCCGUUAAGAGGAAACCGU<br />||||||.|||o|||||||.<br />GGGCAACUCUUCUUUGGCU
200	pyr-4017	Pbr039040.1	3	793-814	target 5' GGAAUGGGUGGUAUUGGAAAGA 3'<br /> :::::::: :: ::::::::::<br />query 3' CCUUACCCUCCUUAACCUUUCU 5'	3	0.82	CCUUACCCUCCUUAACCUUUCU<br />||||||||.||.||||||||||<br />GGAAUGGGUGGUAUUGGAAAGA
201	pyr-novel-miR-30-3p	Pbr019804.1	4	337-356	target 5' GA-GGGAGAAGAAGAGAGAGU 3'<br /> :: :. :::::::.::::::.<br />query 3' CUACUGUCUUCUUUUCUCUCG 5'	-	-	-
202	pyr-1395	Pbr032583.1	4	770-787	target 5' GUGCAAUUCU-UUUUGGCA 3'<br /> : :::::::: .:::::::<br />query 3' CCCGUUAAGAGGAAACCGU 5'	-	-	-
203	pyr-401	Pbr040364.1	4	585-604	target 5' CAUGGGAGGACUGGGGAAGA 3'<br /> ::::::::: :.:::::::<br />query 3' UUACCCUCCUUAUCCCUUCU 5'	-	-	-
204	pyr-835	Pbr036644.3	4	135-157	target 5' GAUGAGAGAAAGAGAAAGUGAGC 3'<br /> : ::: :::::::: ::::::::<br />query 3' CGACUGUCUUUCUC-UUCACUCG 5'	-	-	-
205	pyr-166	Pbr023112.3	4	625-646	target 5' GGGAUGGGGGGAAUGGGAAAGA 3'<br /> ::.:::::.:::::.:: ::::<br />query 3' CCUUACCCUCCUUAUCCCUUCU 5'	-	-	-
206	pyr-novel-miR-30-3p	Pbr021943.1	4	189-209	target 5' GGAGGAAGAAGAGAAGAGAGC 3'<br /> :. :. ::::::.::::::::<br />query 3' CUACUGUCUUCUUUUCUCUCG 5'	-	-	-
207	pyr-4017	Pbr023003.1	3	592-613	target 5' GGCAUGGCUGGAAUUGGAAAGA 3'<br /> :: :::: :::::::::::::<br />query 3' CCUUACCCUCCUUAACCUUUCU 5'	3	0.74	CCUUACCCUCCUUAACCUUUCU<br />||.||||..|||||||||||||<br />GGCAUGGCUGGAAUUGGAAAGA
208	pyr-166	Pbr003792.1	4	662-683	target 5' GGAAUGGGAGGCAUAGGCAAGA 3'<br /> ::::::::::: ::::: ::::<br />query 3' CCUUACCCUCCUUAUCCCUUCU 5'	-	-	-
209	pyr-novel-miR-30-3p	Pbr017346.1	4	643-664	target 5' UAUGAUGGAAAGAAAAGAGAGA 3'<br /> ::::..: :::::::::::: <br />query 3' CUACUGUC-UUCUUUUCUCUCG 5'	-	-	-
210	pyr-4860	Pbr009751.1	3.5	480-499	target 5' UGAGAGGCUUUUGAGGGAGC 3'<br /> :: ::.::.:::::::::: <br />query 3' AC-CUUCGGAAACUCCCUCU 5'	-	-	-
211	pyr-401	Pbr023185.1	2	468-487	target 5' AAUGGGAGGACUAGGGAAGA 3'<br /> :::::::::: :::::::::<br />query 3' UUACCCUCCUUAUCCCUUCU 5'	2	0.91	UUACCCUCCUUAUCCCUUCU<br />||||||||||.|||||||||<br />AAUGGGAGGACUAGGGAAGA
212	pyr-novel-miR-127-3p	Pbr029993.1	4	2379-2399	target 5' GAUGAUGGAAGAAGAGAAAGC 3'<br /> :::::..::::::.::: :::<br />query 3' CUACUGUCUUCUUUUCUCUCG 5'	-	-	-
213	pyr-novel-miR-107-3p	Pbr038082.1	3.5	215-235	target 5' UGGGAGACUUAGCCAA-GAAGC 3'<br /> ::.::::::::::::: :::: <br />query 3' ACUCUCUGAAUCGGUUCCUUCC 5'	-	-	-
214	pyr-401	Pbr041167.1	3.5	789-808	target 5' GAUGUCUGGAAUAGGGAAGA 3'<br /> .::: :::::::::::::<br />query 3' UUACCCUCCUUAUCCCUUCU 5'	3.5	0.72	UUACCCUCCUUAUCCCUUCU<br />o|||...|||||||||||||<br />GAUGUCUGGAAUAGGGAAGA
215	pyr-4017	Pbr017278.1	4	613-634	target 5' GGAAUGGGAGGCAUCGGAAAGA 3'<br /> ::::::::::: :: :::::::<br />query 3' CCUUACCCUCCUUAACCUUUCU 5'	-	-	-
216	pyr-4157	Pbr025907.1	3.5	2135-2155	target 5' UUGGAAUUCUUUCAGGGAGGU 3'<br /> :::::: .:::: ::::::::<br />query 3' AACCUUCGGAAACUCCCUCCA 5'	-	-	-
217	pyr-4017	Pbr018042.1	4	93-114	target 5' CCAAUGGCAGGAGUUGGAAAGA 3'<br /> ::::: ::::.:::::::::<br />query 3' CCUUACCCUCCUUAACCUUUCU 5'	-	-	-
218	pyr-317	Pbr007487.1	4	1181-1199	target 5' AAGAUG-AGGUGCAAAUGCC 3'<br /> :: :: :::::::::::: <br />query 3' CUCCACGUCCACGUUUACGU 5'	-	-	-
219	pyr-401	Pbr004587.1	4	699-718	target 5' AAUGGGAGGCAUAGGCAAGA 3'<br /> ::::::::: ::::: ::::<br />query 3' UUACCCUCCUUAUCCCUUCU 5'	-	-	-
220	pyr-4017	Pbr036390.1	4	2429-2449	target 5' GGAAU-GCAGGAAUUGCAAAGA 3'<br /> ::::: : :::::::: :::::<br />query 3' CCUUACCCUCCUUAACCUUUCU 5'	-	-	-
221	pyr-4017	Pbr033346.1	4	87-108	target 5' CCAAUGGCAGGAGUUGGAAAGA 3'<br /> ::::: ::::.:::::::::<br />query 3' CCUUACCCUCCUUAACCUUUCU 5'	-	-	-
222	pyr-novel-miR-18-3p	Pbr021475.1	2	142-162	target 5' AAGCUAGUUGCGGUAAGUUCA 3'<br /> :::::::::::..::::::::<br />query 3' UUCGAUCAACGUUAUUCAAGU 5'	2	0.98	UUCGAUCAACGUUAUUCAAGU<br />|||||||||||oo||||||||<br />AAGCUAGUUGCGGUAAGUUCA
223	pyr-novel-miR-30-3p	Pbr002867.1	4	865-886	target 5' GAAGAGAGGAAGAAAAGAGAGG 3'<br /> :: :: : ::::::::::::: <br />query 3' CUACUGU-CUUCUUUUCUCUCG 5'	-	-	-
224	pyr-1983	Pbr040570.1	4	33-54	target 5' GCACUGCUCUUCCUCUUCCCUG 3'<br /> :: :::::: :::::::::::<br />query 3' GGU-ACGAGACGGAGAAGGGAC 5'	-	-	-
225	pyr-novel-miR-30-3p	Pbr031664.1	3.5	222-241	target 5' AAUGACGGAAGAAAA-AGAGC 3'<br /> :::::.:::::::: :::::<br />query 3' CUACUGUCUUCUUUUCUCUCG 5'	-	-	-
226	pyr-89	Pbr038413.1	4	386-406	target 5' AAGCUCCAUCAAACACUUCAU 3'<br /> :: ::: .::::::::::::<br />query 3' CUCAAGGGGGUUUGUGAAGUA 5'	-	-	-
227	pyr-1395	Pbr019428.1	4	990-1008	target 5' GUGUGAUUCUCAUUUGGCA 3'<br /> : :..:::::: :::::::<br />query 3' CCCGUUAAGAGGAAACCGU 5'	-	-	-
228	pyr-518	Pbr006646.1	4	643-664	target 5' GGAAUGGGCGGAAUGGGGAAGA 3'<br /> :::::::: :: ::.:::::::<br />query 3' CCUUACCCUCCGUAUCCCUUCU 5'	-	-	-
229	pyr-4860	Pbr011530.1	4	1444-1463	target 5' UUGAAGCCUUUGAAGGGGGA 3'<br /> : :::::::::: ::::.::<br />query 3' ACCUUCGGAAAC-UCCCUCU 5'	-	-	-
230	pyr-4860	Pbr015962.1	4	304-321	target 5' UCGAAGCCUUUGA-GGAGC 3'<br /> : ::::::::::: :::: <br />query 3' ACCUUCGGAAACUCCCUCU 5'	-	-	-
231	pyr-317	Pbr028303.1	4	3125-3144	target 5' GAGCACCAGGUGCAAAUGCU 3'<br /> ::: ::::::::::::: <br />query 3' CUCCACGUCCACGUUUACGU 5'	-	-	-
232	pyr-1395	Pbr000840.1	4	155-173	target 5' GAGCAUUUCUCCUUUGGUU 3'<br /> : ::: :::::::::::. <br />query 3' CCCGUUAAGAGGAAACCGU 5'	-	-	-
233	pyr-2216	Pbr032620.1	3.5	209-230	target 5' GAGUCCCCACCAAACAUUUCAG 3'<br /> :::: ::: :::::::.::::.<br />query 3' CUCAAGGG-GGUUUGUGAAGUU 5'	-	-	-
234	pyr-4017	Pbr034979.1	4	1190-1211	target 5' GGUAUACGAGGAGUUGGAAAGA 3'<br /> :: :: :::::.:::::::::<br />query 3' CCUUACCCUCCUUAACCUUUCU 5'	-	-	-
235	pyr-166	Pbr004587.1	4	697-718	target 5' GGAAUGGGAGGCAUAGGCAAGA 3'<br /> ::::::::::: ::::: ::::<br />query 3' CCUUACCCUCCUUAUCCCUUCU 5'	-	-	-
236	pyr-835	Pbr009687.1	3	85-105	target 5' GCUGA-AGAGAGAGAAGUGAGA 3'<br /> ::::: :::.::::::::::: <br />query 3' CGACUGUCUUUCUCUUCACUCG 5'	2.5	0.82	CGACUGUCUUUCUCUUCACUCG<br />|||||.|||o|||||||||||.<br />GCUGA-AGAGAGAGAAGUGAGA
237	pyr-3417	Pbr015248.1	3	1144-1164	target 5' UCGGGAAGUCAUCCUUGGCUC 3'<br /> .::: ::.:::::::::::: <br />query 3' GGCCGUUUAGUAGGAACCGAC 5'	3	0.82	GGCCGUUUAGUAGGAACCGAC<br />o|||.||o||||||||||||.<br />UCGGGAAGUCAUCCUUGGCUC
238	pyr-1557	Pbr013221.1	4	988-1007	target 5' AAGUCCCCCCAAA-ACUUCAC 3'<br /> ::: :::::::: :::::::<br />query 3' CUCAAGGGGGUUUGUGAAGUG 5'	-	-	-
239	pyr-novel-miR-65-5p	Pbr033430.1	4	715-736	target 5' CCUGCCAAUGGAGAUGUUGCAC 3'<br /> ::::::: :::::: ::::::<br />query 3' AGACGGUUUCCUCUA-AACGUG 5'	-	-	-
240	pyr-novel-miR-30-3p	Pbr033678.1	4	2102-2121	target 5' ACUGA-AAAAGAAAAGAGAGC 3'<br /> ::: : :::::::::::::<br />query 3' CUACUGUCUUCUUUUCUCUCG 5'	-	-	-
241	pyr-novel-miR-107-3p	Pbr032255.1	4	1566-1587	target 5' CAAGAGCAUUAGCCAAGGAAGG 3'<br /> :::: ::::::::::::::<br />query 3' ACUCUCUGAAUCGGUUCCUUCC 5'	-	-	-
242	pyr-4017	Pbr038473.1	2	601-622	target 5' GGCAUGGGAGGAAUUGGGAAGA 3'<br /> :: ::::::::::::::.::::<br />query 3' CCUUACCCUCCUUAACCUUUCU 5'	2	0.90	CCUUACCCUCCUUAACCUUUCU<br />||.||||||||||||||o||||<br />GGCAUGGGAGGAAUUGGGAAGA
243	pyr-3809	Pbr001412.1	3	159-179	target 5' CAGGGAAACUCUCCUUUGGCU 3'<br /> :::: :::::::::::::: <br />query 3' UUCCCGUUGAGAGGAAACCGU 5'	3	0.76	UUCCCGUUGAGAGGAAACCGU<br />.||||.||||||||||||||.<br />CAGGGAAACUCUCCUUUGGCU
244	pyr-870	Pbr016259.1	-	-	-	2.5		GGCCCGUUAAGAGGAAACCGU<br />o.||||||.||||||||||||<br />UAGGGCAAAUCUCCUUUGGCA
245	pyr-novel-miR-117-3p	Pbr032620.1	3	209-230	target 5' GAGUCCCCACCAAACAUUUCAG 3'<br /> :::: ::: :::::::.:::::<br />query 3' CUCAAGGG-GGUUUGUGAAGUC 5'	3	0.78	CUCAAGGG-GGUUUGUGAAGUC<br />||||.|||.|||||||o|||||<br />GAGUCCCCACCAAACAUUUCAG
246	pyr-518	Pbr004587.1	2	697-718	target 5' GGAAUGGGAGGCAUAGGCAAGA 3'<br /> ::::::::::::::::: ::::<br />query 3' CCUUACCCUCCGUAUCCCUUCU 5'	2	0.87	CCUUACCCUCCGUAUCCCUUCU<br />|||||||||||||||||.||||<br />GGAAUGGGAGGCAUAGGCAAGA
247	pyr-4218	Pbr032574.1	4	2402-2421	target 5' UGGUAGCCGUUGGGGGAGAU 3'<br /> ::: :::: :::.:::::::<br />query 3' ACCUUCGGAAACUCCCUCUA 5'	-	-	-
248	pyr-401	Pbr019924.1	1.5	633-652	target 5' GAUGGGAGGAAUGGGGAAGA 3'<br /> .:::::::::::.:::::::<br />query 3' UUACCCUCCUUAUCCCUUCU 5'	1.5	0.99	UUACCCUCCUUAUCCCUUCU<br />o|||||||||||o|||||||<br />GAUGGGAGGAAUGGGGAAGA
249	pyr-novel-miR-137-5p	Pbr027204.1	1	777-798	target 5' AAUAUUGGAAGCCUUUGAGGGA 3'<br /> :::::::: :::::::::::::<br />query 3' UUAUAACCCUCGGAAACUCCCU 5'	1	0.86	UUAUAACCCUCGGAAACUCCCU<br />||||||||.|||||||||||||<br />AAUAUUGGAAGCCUUUGAGGGA
250	pyr-401	Pbr012363.1	4	1939-1958	target 5' GGUGAGAGGAAUGGGGAAGC 3'<br /> ..:: :::::::.:::::: <br />query 3' UUACCCUCCUUAUCCCUUCU 5'	-	-	-
251	pyr-novel-miR-84-3p	Pbr018761.1	2	352-372	target 5' GAGUUUCUCCAAACACUUCAU 3'<br /> :::::.:.:::::::::::: <br />query 3' CUCAAGGGGGUUUGUGAAGUC 5'	2	0.83	CUCAAGGGGGUUUGUGAAGUC<br />|||||o|o||||||||||||.<br />GAGUUUCUCCAAACACUUCAU
252	pyr-novel-miR-17-3p	Pbr020839.1	3	979-999	target 5' GGUUUCCUCCAAACACUUCAA 3'<br /> :. ::::.:::::::::::: <br />query 3' CUCAAGGGGGUUUGUGAAGUC 5'	3	0.75	CUCAAGGGGGUUUGUGAAGUC<br />|o.||||o||||||||||||.<br />GGUUUCCUCCAAACACUUCAA
253	pyr-novel-miR-46-3p	Pbr039312.1	2	199-219	target 5' GAGUUCACCCAAACACUUCAA 3'<br /> :::::: ::::::::::::: <br />query 3' CUCAAGGGGGUUUGUGAAGUC 5'	2	0.81	CUCAAGGGGGUUUGUGAAGUC<br />||||||.|||||||||||||.<br />GAGUUCACCCAAACACUUCAA
254	pyr-1677	Pbr038395.1	3.5	708-728	target 5' UGGUGCAAGUGCAAGUGCAGG 3'<br /> :::::: ::::::.:::::.<br />query 3' UCCACGUCCACGUUUACGUCU 5'	3.5	0.76	UCCACGUCCACGUUUACGUCU<br />.||||||.||||||o|||||o<br />UGGUGCAAGUGCAAGUGCAGG
255	pyr-2609	Pbr039624.1	4	3630-3651	target 5' GAGAUCAGGCUGGCAGCUUGUA 3'<br /> ::::::: ::::::::::: .:<br />query 3' CUCUAGUACGACCGUCGAA-GU 5'	-	-	-
256	pyr-89	Pbr014657.1	2.5	678-698	target 5' GAGUUCCUCCAAACUCUUCAU 3'<br /> :::::::.:::::: ::::::<br />query 3' CUCAAGGGGGUUUGUGAAGUA 5'	2.5	0.85	CUCAAGGGGGUUUGUGAAGUA<br />|||||||o||||||.||||||<br />GAGUUCCUCCAAACUCUUCAU
257	pyr-novel-miR-127-3p	Pbr002867.1	4	865-886	target 5' GAAGAGAGGAAGAAAAGAGAGG 3'<br /> :: :: : ::::::::::::: <br />query 3' CUACUGU-CUUCUUUUCUCUCG 5'	-	-	-
258	pyr-novel-miR-65-3p	Pbr016259.1	4	104-124	target 5' UAGGGCCGAUCUCCUUUGGCA 3'<br /> .::::: . ::::::::::::<br />query 3' GUCCCGUUAAGAGGAAACCGU 5'	1.5	0.88	GUCCCGUUAAGAGGAAACCGU<br />o|||||||.||||||||||||<br />UAGGGCAAAUCUCCUUUGGCA
259	pyr-novel-miR-127-3p	Pbr038354.1	4	1118-1138	target 5' AUUCCCAGAAGAAAAGAGAGC 3'<br /> : ::::::::::::::::<br />query 3' CUACUGUCUUCUUUUCUCUCG 5'	-	-	-
260	pyr-4218	Pbr025905.1	3.5	2076-2095	target 5' UGGAAGUCUUUCAGGGAGGU 3'<br /> ::::::.:::: ::::::.:<br />query 3' ACCUUCGGAAACUCCCUCUA 5'	3.5	0.79	ACCUUCGGAAACUCCCUCUA<br />||||||o||||.||||||o|<br />UGGAAGUCUUUCAGGGAGGU
261	pyr-317	Pbr004256.2	4	667-686	target 5' UCAGCGCAGGUGCAAAUGCA 3'<br /> : :::::::::::::::<br />query 3' CUCCACGUCCACGUUUACGU 5'	-	-	-
262	pyr-630	Pbr016259.1	4	104-124	target 5' UAGGGCCGAUCUCCUUUGGCA 3'<br /> .::::: . ::::::::::::<br />query 3' GUCCCGUUGAGAGGAAACCGU 5'	1.5	0.84	GUCCCGUUGAGAGGAAACCGU<br />o|||||||.||||||||||||<br />UAGGGCAAAUCUCCUUUGGCA
263	pyr-novel-miR-137-5p	Pbr036939.1	1	786-807	target 5' AAUAUUGGAAGCCUUUGAGGGA 3'<br /> :::::::: :::::::::::::<br />query 3' UUAUAACCCUCGGAAACUCCCU 5'	1	0.86	UUAUAACCCUCGGAAACUCCCU<br />||||||||.|||||||||||||<br />AAUAUUGGAAGCCUUUGAGGGA
264	pyr-novel-miR-117-3p	Pbr003032.1	3.5	13-33	target 5' GAGUUCCUCCAAACUCUUCAU 3'<br /> :::::::.:::::: ::::: <br />query 3' CUCAAGGGGGUUUGUGAAGUC 5'	3.5	0.81	CUCAAGGGGGUUUGUGAAGUC<br />|||||||o||||||.|||||.<br />GAGUUCCUCCAAACUCUUCAU
265	pyr-novel-miR-127-3p	Pbr010667.1	4	851-870	target 5' GA-GAGAGAAGAGAAGAGAGA 3'<br /> :: :: ::::::.::::::: <br />query 3' CUACUGUCUUCUUUUCUCUCG 5'	-	-	-
266	pyr-novel-miR-30-3p	Pbr030805.1	4	165-184	target 5' GAUGA-AGAAGAAGAGAGGGA 3'<br /> ::::: :::::::.::::.: <br />query 3' CUACUGUCUUCUUUUCUCUCG 5'	-	-	-
267	pyr-novel-miR-117-3p	Pbr039312.1	2	199-219	target 5' GAGUUCACCCAAACACUUCAA 3'<br /> :::::: ::::::::::::: <br />query 3' CUCAAGGGGGUUUGUGAAGUC 5'	2	0.81	CUCAAGGGGGUUUGUGAAGUC<br />||||||.|||||||||||||.<br />GAGUUCACCCAAACACUUCAA
268	pyr-1677	Pbr018551.1	4	1577-1597	target 5' AGCUGCAUGUGCAAAGGCAGA 3'<br /> :: :::: ::::::: :::::<br />query 3' UCCACGUCCACGUUUACGUCU 5'	-	-	-
269	pyr-518	Pbr025928.1	4	64-85	target 5' GGAGUUGGGGGCAUAGGAAAGA 3'<br /> :::.: ::.:::::::: ::::<br />query 3' CCUUACCCUCCGUAUCCCUUCU 5'	-	-	-
270	pyr-novel-miR-125-3p	Pbr016259.1	3.5	104-124	target 5' UAGGGCCGAUCUCCUUUGGCA 3'<br /> . :.:: .:::::::::::::<br />query 3' GGCUCGUUUAGAGGAAACCGU 5'	2	0.82	GGCUCGUUUAGAGGAAACCGU<br />o.|o|||||||||||||||||<br />UAGGGCAAAUCUCCUUUGGCA
271	pyr-2609	Pbr026052.1	4	212-231	target 5' GA-AUCAAGCUGGGAGCUUCA 3'<br /> :: :::: ::::: :::::::<br />query 3' CUCUAGUACGACCGUCGAAGU 5'	-	-	-
272	pyr-novel-miR-144-3p	Pbr002903.1	3	248-268	target 5' CAGGGCAACUCUUCUUUGGCU 3'<br /> :::::::::::.::::::: <br />query 3' UUCCCGUUGAGAGGAAACCGU 5'	3	0.84	UUCCCGUUGAGAGGAAACCGU<br />.|||||||||||o|||||||.<br />CAGGGCAACUCUUCUUUGGCU
273	pyr-novel-miR-79-3p	Pbr016259.1	4	104-124	target 5' UAGGGCCGAUCUCCUUUGGCA 3'<br /> .::::: . ::::::::::::<br />query 3' GUCCCGUUAAGAGGAAACCGU 5'	1.5	0.88	GUCCCGUUAAGAGGAAACCGU<br />o|||||||.||||||||||||<br />UAGGGCAAAUCUCCUUUGGCA
274	pyr-4017	Pbr031135.1	4	528-548	target 5' GGCAU-GGAGGAGUUGGAGAGA 3'<br /> :: :: ::::::.:::::.:::<br />query 3' CCUUACCCUCCUUAACCUUUCU 5'	-	-	-
275	pyr-166	Pbr003797.1	4	10307-10328	target 5' GGAAUGGGAGGCAUAGGCAAGA 3'<br /> ::::::::::: ::::: ::::<br />query 3' CCUUACCCUCCUUAUCCCUUCU 5'	-	-	-
276	pyr-4860	Pbr042519.1	4	92-110	target 5' CGAAAGCCUUUGAUGGAGA 3'<br /> : :::::::::: :::::<br />query 3' ACCUUCGGAAACUCCCUCU 5'	-	-	-
277	pyr-4017	Pbr023985.1	2	799-820	target 5' GGAAUGGGUGGGAUUGGAAAGA 3'<br /> :::::::: ::.::::::::::<br />query 3' CCUUACCCUCCUUAACCUUUCU 5'	2	0.90	CCUUACCCUCCUUAACCUUUCU<br />||||||||.||o||||||||||<br />GGAAUGGGUGGGAUUGGAAAGA
278	pyr-4034	Pbr032267.1	4	881-899	target 5' AGGGCUG-CCUGGGAACACA 3'<br /> :::: :: ::::.:::::::<br />query 3' UCCCCACUGGACUCUUGUGU 5'	-	-	-
279	pyr-518	Pbr026137.1	4	313-334	target 5' GGAAUUGGAGGUUUAGGGAAGA 3'<br /> ::::: :::::. :::::::::<br />query 3' CCUUACCCUCCGUAUCCCUUCU 5'	-	-	-
280	pyr-1983	Pbr020969.1	4	61-81	target 5' CUAGGCUUUGCCUCUUCCUUC 3'<br /> :.: :::.::::::::::.: <br />query 3' GGUACGAGACGGAGAAGGGAC 5'	-	-	-
281	pyr-401	Pbr003797.1	4	10309-10328	target 5' AAUGGGAGGCAUAGGCAAGA 3'<br /> ::::::::: ::::: ::::<br />query 3' UUACCCUCCUUAUCCCUUCU 5'	-	-	-
282	pyr-4011	Pbr022573.1	3.5	129-149	target 5' AGGUUCCACCAAACACUUCAA 3'<br /> :::.:: :::::::::::: <br />query 3' CCCAGGGGGGUUUGUGAAGUC 5'	-	-	-
283	pyr-835	Pbr008268.1	3.5	1266-1287	target 5' GUUGGAAGGAAGAGAAGUGAGG 3'<br /> :.::. ::.:::::::::::: <br />query 3' CGACUGUCUUUCUCUUCACUCG 5'	-	-	-
284	pyr-4860	Pbr010433.1	2	497-515	target 5' UGGAAGCCUUGGAGGGAGA 3'<br /> :::::::::: ::::::::<br />query 3' ACCUUCGGAAACUCCCUCU 5'	2	0.91	ACCUUCGGAAACUCCCUCU<br />||||||||||.||||||||<br />UGGAAGCCUUGGAGGGAGA
285	pyr-3417	Pbr036578.1	3	2300-2320	target 5' GCGGCAAUUCAUUCUUGGCUG 3'<br /> :::::: ::::.::::::::<br />query 3' GGCCGUUUAGUAGGAACCGAC 5'	3	0.79	GGCCGUUUAGUAGGAACCGAC<br />.||||||.||||o||||||||<br />GCGGCAAUUCAUUCUUGGCUG
286	pyr-2216	Pbr004737.1	1.5	795-815	target 5' GAGUUCCUCCAAACACUUCAU 3'<br /> :::::::.:::::::::::: <br />query 3' CUCAAGGGGGUUUGUGAAGUU 5'	1.5	0.93	CUCAAGGGGGUUUGUGAAGUU<br />|||||||o||||||||||||.<br />GAGUUCCUCCAAACACUUCAU
287	pyr-4017	Pbr032154.1	4	88-109	target 5' GGUAUGGGUGGUAUUGGAAAGA 3'<br /> :: ::::: :: ::::::::::<br />query 3' CCUUACCCUCCUUAACCUUUCU 5'	-	-	-
288	pyr-4017	Pbr038472.1	4	791-812	target 5' GGCAUGGGAGGACUUGGGAAGA 3'<br /> :: ::::::::: ::::.::::<br />query 3' CCUUACCCUCCUUAACCUUUCU 5'	-	-	-
289	pyr-317	Pbr002686.1	4	7510-7529	target 5' GAUGAGGAGGUGCAGAUGCA 3'<br /> :: : : :::::::.:::::<br />query 3' CUCCACGUCCACGUUUACGU 5'	-	-	-
290	pyr-1677	Pbr027000.1	-	-	-	3		UCCACGUC--CACGUUUACGUCU<br />||||||||...||||||||||||<br />AGGUGCAGCCUUGCAAAUGCAGA
291	pyr-4860	Pbr009797.1	3.5	480-499	target 5' UGAGAGGCUUUUGAGGGAGC 3'<br /> :: ::.::.:::::::::: <br />query 3' AC-CUUCGGAAACUCCCUCU 5'	-	-	-
292	pyr-novel-miR-122-3p	Pbr032486.1	4	2285-2306	target 5' AAGCUAGUAUGUAAUGAGUUCA 3'<br /> :::::::: ::.:::.::::: <br />query 3' UUCGAUCA-ACGUUAUUCAAGC 5'	-	-	-
293	pyr-1677	Pbr030433.1	3.5	60-80	target 5' UGGUGCAGGUGCAGGUGCAGG 3'<br /> ::::::::::::..:::::.<br />query 3' UCCACGUCCACGUUUACGUCU 5'	3.5	0.88	UCCACGUCCACGUUUACGUCU<br />.||||||||||||oo|||||o<br />UGGUGCAGGUGCAGGUGCAGG
294	pyr-novel-miR-17-3p	Pbr034014.5	3	928-948	target 5' GGUUUCCUCCAAACACUUCAA 3'<br /> :. ::::.:::::::::::: <br />query 3' CUCAAGGGGGUUUGUGAAGUC 5'	3	0.75	CUCAAGGGGGUUUGUGAAGUC<br />|o.||||o||||||||||||.<br />GGUUUCCUCCAAACACUUCAA
295	pyr-4157	Pbr036615.1	4	893-913	target 5' UUGGGAGUCUUUGUGGGAGGG 3'<br /> ::::.::.::::: :::::: <br />query 3' AACCUUCGGAAACUCCCUCCA 5'	-	-	-
296	pyr-novel-miR-157-3p	Pbr021475.1	3	142-162	target 5' AAGCUAGUUGCGGUAAGUUCA 3'<br /> :::::::::::..::::::: <br />query 3' UUCGAUCAACGUUAUUCAAGC 5'	3	0.95	UUCGAUCAACGUUAUUCAAGC<br />|||||||||||oo|||||||.<br />AAGCUAGUUGCGGUAAGUUCA
297	pyr-1613	Pbr001402.1	3.5	305-325	target 5' AGGUAAGUCAUUCUUUGCUCA 3'<br /> :::.:::::::.::: :::::<br />query 3' UCCGUUCAGUAGGAACCGAGU 5'	3.5	0.77	UCCGUUCAGUAGGAACCGAGU<br />|||o|||||||o|||.|||||<br />AGGUAAGUCAUUCUUUGCUCA
298	pyr-317	Pbr042907.1	3	1865-1884	target 5' UAGGUGCAGGUGCAGGUGCA 3'<br /> :::::::::::::..::::<br />query 3' CUCCACGUCCACGUUUACGU 5'	3	0.87	CUCCACGUCCACGUUUACGU<br />.|||||||||||||oo||||<br />UAGGUGCAGGUGCAGGUGCA
299	pyr-4017	Pbr022039.1	3.5	646-667	target 5' GGGAUGGGAGGAAUGGGGAAGA 3'<br /> ::.::::::::::: ::.::::<br />query 3' CCUUACCCUCCUUAACCUUUCU 5'	3.5	0.89	CCUUACCCUCCUUAACCUUUCU<br />||o|||||||||||.||o||||<br />GGGAUGGGAGGAAUGGGGAAGA
300	pyr-novel-miR-79-5p	Pbr010163.1	-	-	-	3.5		AGACGGUUUCCUCUUAACGUG<br />||||o|||.||||o||||||.<br />UCUGUCAAUGGAGGAUUGCAG
301	pyr-317	Pbr038395.1	4	706-726	target 5' GAUGGUGCAAGUGCAAGUGCA 3'<br /> :: :::::: ::::::.::::<br />query 3' CU-CCACGUCCACGUUUACGU 5'	-	-	-
302	pyr-4218	Pbr027204.1	1	782-801	target 5' UGGAAGCCUUUGAGGGAGAG 3'<br /> ::::::::::::::::::: <br />query 3' ACCUUCGGAAACUCCCUCUA 5'	1	1.00	ACCUUCGGAAACUCCCUCUA<br />|||||||||||||||||||.<br />UGGAAGCCUUUGAGGGAGAG
303	pyr-2216	Pbr028018.1	4	966-985	target 5' GAG-UGCUCUAAACACUUCAG 3'<br /> ::: : :.:.::::::::::.<br />query 3' CUCAAGGGGGUUUGUGAAGUU 5'	-	-	-
304	pyr-2609	Pbr002342.1	4	2862-2883	target 5' GAGAUCAGGCUGGCAGCUUGUA 3'<br /> ::::::: ::::::::::: .:<br />query 3' CUCUAGUACGACCGUCGAA-GU 5'	-	-	-
305	pyr-novel-miR-144-3p	Pbr018935.1	4	393-413	target 5' AAGGGGAACUCUCUUCUGGCA 3'<br /> ::::: :::::::.: :::::<br />query 3' UUCCCGUUGAGAGGAAACCGU 5'	-	-	-
306	pyr-317	Pbr030289.1	4	19-38	target 5' CUAGUGAAGGUGCAAAUGCA 3'<br /> ::: :::::::::::::<br />query 3' CUCCACGUCCACGUUUACGU 5'	-	-	-
307	pyr-3809	Pbr003857.1	4	405-425	target 5' AAGGGGAACUCUCUUCUGGCA 3'<br /> ::::: :::::::.: :::::<br />query 3' UUCCCGUUGAGAGGAAACCGU 5'	-	-	-
308	pyr-1804	Pbr015013.1	4	354-374	target 5' UGGCAAGUCUCCUUUGACAGA 3'<br /> ::::: ::::::::: ::::<br />query 3' CCCGUUAAGAGGAAACCGUCU 5'	-	-	-
309	pyr-317	Pbr013330.1	4	785-804	target 5' CAGGUGCAGGUGCAGGUGCU 3'<br /> :::::::::::::..::: <br />query 3' CUCCACGUCCACGUUUACGU 5'	-	-	-
310	pyr-novel-miR-108-3p	Pbr002903.1	2	248-268	target 5' CAGGGCAACUCUUCUUUGGCU 3'<br /> ::::::::::::.::::::: <br />query 3' GUCCCGUUGAGAGGAAACCGU 5'	2	0.93	GUCCCGUUGAGAGGAAACCGU<br />||||||||||||o|||||||.<br />CAGGGCAACUCUUCUUUGGCU
311	pyr-novel-miR-79-5p	Pbr038277.1	4	831-851	target 5' UCUGUCCAAGGAGAAUUACAU 3'<br /> ::::.: :::::::::: ::.<br />query 3' AGACGGUUUCCUCUUAACGUG 5'	-	-	-
312	pyr-4017	Pbr038352.1	4	615-636	target 5' GGCAUGGGAGGCAUUGGGAAGA 3'<br /> :: :::::::: :::::.::::<br />query 3' CCUUACCCUCCUUAACCUUUCU 5'	-	-	-
313	pyr-novel-miR-144-3p	Pbr001412.1	3	159-179	target 5' CAGGGAAACUCUCCUUUGGCU 3'<br /> :::: :::::::::::::: <br />query 3' UUCCCGUUGAGAGGAAACCGU 5'	3	0.76	UUCCCGUUGAGAGGAAACCGU<br />.||||.||||||||||||||.<br />CAGGGAAACUCUCCUUUGGCU
314	pyr-novel-miR-127-3p	Pbr017346.1	4	643-664	target 5' UAUGAUGGAAAGAAAAGAGAGA 3'<br /> ::::..: :::::::::::: <br />query 3' CUACUGUC-UUCUUUUCUCUCG 5'	-	-	-
315	pyr-2216	Pbr022573.1	2.5	129-149	target 5' AGGUUCCACCAAACACUUCAA 3'<br /> .::::: :::::::::::::<br />query 3' CUCAAGGGGGUUUGUGAAGUU 5'	2.5	0.72	CUCAAGGGGGUUUGUGAAGUU<br />.o|||||.|||||||||||||<br />AGGUUCCACCAAACACUUCAA
316	pyr-novel-miR-65-3p	Pbr020849.1	4	355-374	target 5' CAGGGCAA-UCUCUUUUGGCC 3'<br /> :::::::: ::::.:::::: <br />query 3' GUCCCGUUAAGAGGAAACCGU 5'	-	-	-
317	pyr-518	Pbr032836.1	4	55-76	target 5' GGACUUGGAGGCUUAGGGAAGA 3'<br /> ::: : :::::: :::::::::<br />query 3' CCUUACCCUCCGUAUCCCUUCU 5'	-	-	-
318	pyr-89	Pbr020839.1	3	979-999	target 5' GGUUUCCUCCAAACACUUCAA 3'<br /> :. ::::.:::::::::::: <br />query 3' CUCAAGGGGGUUUGUGAAGUA 5'	3	0.78	CUCAAGGGGGUUUGUGAAGUA<br />|o.||||o||||||||||||.<br />GGUUUCCUCCAAACACUUCAA
319	pyr-2609	Pbr038294.1	3.5	665-684	target 5' GAGCUC-CGCUGGCAGCUUCG 3'<br /> ::: :: ::::::::::::.<br />query 3' CUCUAGUACGACCGUCGAAGU 5'	-	-	-
320	pyr-1557	Pbr022573.1	3.5	129-149	target 5' AGGUUCCACCAAACACUUCAA 3'<br /> .::::: :::::::::::: <br />query 3' CUCAAGGGGGUUUGUGAAGUG 5'	-	-	-
321	pyr-1395	Pbr006390.1	3.5	969-988	target 5' GGGUAGAUUCUCCUUUGGGA 3'<br /> :::.: :::::::::::: :<br />query 3' CCCGU-UAAGAGGAAACCGU 5'	-	-	-
322	pyr-novel-miR-30-3p	Pbr030728.1	3.5	675-694	target 5' GAAGA-AGAAGAAAAGAGGGU 3'<br /> :: :: ::::::::::::.:.<br />query 3' CUACUGUCUUCUUUUCUCUCG 5'	-	-	-
323	pyr-1677	Pbr000995.1	4	627-646	target 5' AGG-GCAGAUGCAGAUGCAGA 3'<br /> ::: :::: ::::.:::::::<br />query 3' UCCACGUCCACGUUUACGUCU 5'	-	-	-
324	pyr-3229	Pbr041517.1	4	5-24	target 5' CGGUGAACCUGACGCCGAAC 3'<br /> ::::::::.:::: :::::<br />query 3' ACCACUUGGGCUGC-GCUUG 5'	-	-	-
325	pyr-novel-miR-107-3p	Pbr014416.1	3.5	215-235	target 5' UGGGAGACUUAGCCAA-GAAGC 3'<br /> ::.::::::::::::: :::: <br />query 3' ACUCUCUGAAUCGGUUCCUUCC 5'	-	-	-
326	pyr-4218	Pbr032804.1	3	497-516	target 5' UGGAAGCCUUGGAGGGAGAA 3'<br /> :::::::::: :::::::: <br />query 3' ACCUUCGGAAACUCCCUCUA 5'	3	0.91	ACCUUCGGAAACUCCCUCUA<br />||||||||||.||||||||.<br />UGGAAGCCUUGGAGGGAGAA
327	pyr-4157	Pbr025905.1	2.5	2075-2095	target 5' UUGGAAGUCUUUCAGGGAGGU 3'<br /> :::::::.:::: ::::::::<br />query 3' AACCUUCGGAAACUCCCUCCA 5'	2.5	0.82	AACCUUCGGAAACUCCCUCCA<br />|||||||o||||.||||||||<br />UUGGAAGUCUUUCAGGGAGGU
328	pyr-3330	Pbr027204.1	1	781-801	target 5' UUGGAAGCCUUUGAGGGAGAG 3'<br /> :::::::::::::::::::: <br />query 3' AACCUUCGGAAACUCCCUCUA 5'	1	1.00	AACCUUCGGAAACUCCCUCUA<br />||||||||||||||||||||.<br />UUGGAAGCCUUUGAGGGAGAG
329	pyr-2216	Pbr009275.1	4	256-276	target 5' GGGUUUCGCCAAACGCUUCAU 3'<br /> :.:::.: ::::::.::::: <br />query 3' CUCAAGGGGGUUUGUGAAGUU 5'	-	-	-
330	pyr-89	Pbr032620.1	4	209-230	target 5' GAGUCCCCACCAAACAUUUCAG 3'<br /> :::: ::: :::::::.:::: <br />query 3' CUCAAGGG-GGUUUGUGAAGUA 5'	-	-	-
331	pyr-1804	Pbr001291.1	4	370-391	target 5' CAACAAUUGCUCCUUUGGCAGA 3'<br /> ::::: :::::::::::::<br />query 3' CCCGUUAA-GAGGAAACCGUCU 5'	-	-	-
332	pyr-novel-miR-122-3p	Pbr002483.1	1	133-153	target 5' AAGCUAGUUGCAAUAAGUUCA 3'<br /> :::::::::::::::::::: <br />query 3' UUCGAUCAACGUUAUUCAAGC 5'	1	0.97	UUCGAUCAACGUUAUUCAAGC<br />||||||||||||||||||||.<br />AAGCUAGUUGCAAUAAGUUCA
333	pyr-novel-miR-30-3p	Pbr008824.1	4	166-186	target 5' GAAGACGGUAGAAAAGAGAGU 3'<br /> :: :::.: :::::::::::.<br />query 3' CUACUGUCUUCUUUUCUCUCG 5'	3	0.75	CUACUGUCUUCUUUUCUCUCG<br />||.|||o|.|||||||||||o<br />GAAGACGGUAGAAAAGAGAGU
334	pyr-4017	Pbr041611.1	4	601-622	target 5' GGCAUGGGAGGACUUGGGAAGA 3'<br /> :: ::::::::: ::::.::::<br />query 3' CCUUACCCUCCUUAACCUUUCU 5'	-	-	-
335	pyr-novel-miR-17-3p	Pbr014657.1	3.5	678-698	target 5' GAGUUCCUCCAAACUCUUCAU 3'<br /> :::::::.:::::: ::::: <br />query 3' CUCAAGGGGGUUUGUGAAGUC 5'	3.5	0.81	CUCAAGGGGGUUUGUGAAGUC<br />|||||||o||||||.|||||.<br />GAGUUCCUCCAAACUCUUCAU
336	pyr-4017	Pbr031142.1	4	528-548	target 5' GGCAU-GGAGGAGUUGGAGAGA 3'<br /> :: :: ::::::.:::::.:::<br />query 3' CCUUACCCUCCUUAACCUUUCU 5'	-	-	-
337	pyr-novel-miR-127-3p	Pbr030805.1	4	165-184	target 5' GAUGA-AGAAGAAGAGAGGGA 3'<br /> ::::: :::::::.::::.: <br />query 3' CUACUGUCUUCUUUUCUCUCG 5'	-	-	-
338	pyr-novel-miR-144-3p	Pbr016259.1	3	329-349	target 5' UAGGGCAAAUCUCCUUUGGCA 3'<br /> ::::::: ::::::::::::<br />query 3' UUCCCGUUGAGAGGAAACCGU 5'	2	0.79	UUCCCGUUGAGAGGAAACCGU<br />.|||||||.||||||||||||<br />UAGGGCAAAUCUCCUUUGGCA
339	pyr-4017	Pbr015635.1	3	604-625	target 5' GGAAUGGGAGGAGUUGGUAAGA 3'<br /> ::::::::::::.:::: ::::<br />query 3' CCUUACCCUCCUUAACCUUUCU 5'	3	0.91	CCUUACCCUCCUUAACCUUUCU<br />||||||||||||o||||.||||<br />GGAAUGGGAGGAGUUGGUAAGA
340	pyr-1816	Pbr015708.1	4	34-55	target 5' AAGGGCGACCUGACGAACACAA 3'<br /> : ::: ::::::: ::::::::<br />query 3' UCCCCACUGGACU-CUUGUGUU 5'	-	-	-
341	pyr-novel-miR-127-3p	Pbr011272.2	3.5	882-901	target 5' GGAGA-AGAAGAAAAGAGAGG 3'<br /> :. :: :::::::::::::: <br />query 3' CUACUGUCUUCUUUUCUCUCG 5'	-	-	-
342	pyr-518	Pbr009692.1	4	640-661	target 5' GGCAUGGGAGGCAUGGGAAAGA 3'<br /> :: :::::::::::.:: ::::<br />query 3' CCUUACCCUCCGUAUCCCUUCU 5'	-	-	-
343	pyr-629	Pbr002903.1	3	248-268	target 5' CAGGGCAACUCUUCUUUGGCU 3'<br /> :::::::::::.::::::: <br />query 3' AUCCCGUUGAGAGGAAACCGU 5'	3	0.83	AUCCCGUUGAGAGGAAACCGU<br />.|||||||||||o|||||||.<br />CAGGGCAACUCUUCUUUGGCU
344	pyr-3330	Pbr036939.1	1	790-810	target 5' UUGGAAGCCUUUGAGGGAGAG 3'<br /> :::::::::::::::::::: <br />query 3' AACCUUCGGAAACUCCCUCUA 5'	1	1.00	AACCUUCGGAAACUCCCUCUA<br />||||||||||||||||||||.<br />UUGGAAGCCUUUGAGGGAGAG
345	pyr-4218	Pbr005748.1	4	89-107	target 5' UCCAAG-UUUUGAGGGAGAU 3'<br /> : ::: .::::::::::::<br />query 3' ACCUUCGGAAACUCCCUCUA 5'	-	-	-
346	pyr-novel-miR-127-3p	Pbr012857.1	4	1556-1575	target 5' GAAGA-AGAAGAAGAGAGAGA 3'<br /> :: :: :::::::.:::::: <br />query 3' CUACUGUCUUCUUUUCUCUCG 5'	-	-	-
347	pyr-4011	Pbr039312.1	3.5	199-219	target 5' GAGUUCACCCAAACACUUCAA 3'<br /> : ::.: ::::::::::::: <br />query 3' CCCAGGGGGGUUUGUGAAGUC 5'	-	-	-
348	pyr-novel-miR-122-3p	Pbr021475.1	3	142-162	target 5' AAGCUAGUUGCGGUAAGUUCA 3'<br /> :::::::::::..::::::: <br />query 3' UUCGAUCAACGUUAUUCAAGC 5'	3	0.95	UUCGAUCAACGUUAUUCAAGC<br />|||||||||||oo|||||||.<br />AAGCUAGUUGCGGUAAGUUCA
349	pyr-518	Pbr021960.1	4	535-556	target 5' GGUAUUGGAGGCGUGGGGAAGA 3'<br /> :: :: ::::::.:.:::::::<br />query 3' CCUUACCCUCCGUAUCCCUUCU 5'	-	-	-
350	pyr-753	Pbr026812.1	3.5	51-71	target 5' UUUCGCGUCGGACGACAUUCU 3'<br /> :.::: ..:.:::::::::::<br />query 3' AGAGCUUGGUCUGCUGUAAGA 5'	-	-	-
351	pyr-166	Pbr004591.1	4	549-570	target 5' GGAAUGGGAGGCAUAGGCAAGA 3'<br /> ::::::::::: ::::: ::::<br />query 3' CCUUACCCUCCUUAUCCCUUCU 5'	-	-	-
352	pyr-4860	Pbr032288.1	4	2030-2049	target 5' UUGAAGUCCUUUGUGGGAGA 3'<br /> : :::: :::::: ::::::<br />query 3' ACCUUC-GGAAACUCCCUCU 5'	-	-	-
353	pyr-4017	Pbr029858.1	4	692-713	target 5' GGAAGAAGAGGAGUUGGAAAGA 3'<br /> :::: :::::.:::::::::<br />query 3' CCUUACCCUCCUUAACCUUUCU 5'	-	-	-
354	pyr-401	Pbr002922.1	4	364-383	target 5' AAUGGGAGUAAUGGGGAGGA 3'<br /> :::::::: :::.::::.::<br />query 3' UUACCCUCCUUAUCCCUUCU 5'	-	-	-
355	pyr-630	Pbr011100.1	3.5	2375-2395	target 5' CAGGCCAGCUCUUCUUUGGCU 3'<br /> :::: ::.::::.::::::: <br />query 3' GUCCCGUUGAGAGGAAACCGU 5'	3.5	0.79	GUCCCGUUGAGAGGAAACCGU<br />||||.||o||||o|||||||.<br />CAGGCCAGCUCUUCUUUGGCU
356	pyr-1557	Pbr032620.1	4	209-230	target 5' GAGUCCCCACCAAACAUUUCAG 3'<br /> :::: ::: :::::::.:::: <br />query 3' CUCAAGGG-GGUUUGUGAAGUG 5'	-	-	-
357	pyr-89	Pbr022573.1	3.5	129-149	target 5' AGGUUCCACCAAACACUUCAA 3'<br /> .::::: :::::::::::: <br />query 3' CUCAAGGGGGUUUGUGAAGUA 5'	3.5	0.72	CUCAAGGGGGUUUGUGAAGUA<br />.o|||||.||||||||||||.<br />AGGUUCCACCAAACACUUCAA
358	pyr-2781	Pbr002903.1	4	248-268	target 5' CAGGGCAACUCUUCUUUGGCU 3'<br /> :::::::: :::.::::::: <br />query 3' GUCCCGUUAAGAGGAAACCGU 5'	3	0.85	GUCCCGUUAAGAGGAAACCGU<br />||||||||.|||o|||||||.<br />CAGGGCAACUCUUCUUUGGCU
359	pyr-317	Pbr018158.1	3	7492-7511	target 5' GAGGAGGAGGUGCAGAUGCA 3'<br /> :::: : :::::::.:::::<br />query 3' CUCCACGUCCACGUUUACGU 5'	3	0.81	CUCCACGUCCACGUUUACGU<br />||||.|.|||||||o|||||<br />GAGGAGGAGGUGCAGAUGCA
360	pyr-4157	Pbr004029.1	3.5	2015-2035	target 5' UUGGAAUUCUUUCAGGGAGGU 3'<br /> :::::: .:::: ::::::::<br />query 3' AACCUUCGGAAACUCCCUCCA 5'	-	-	-
361	pyr-4218	Pbr015934.2	3.5	1211-1230	target 5' UGGGAGGCUUUGAUGGAGAU 3'<br /> :::.:: :::::: ::::::<br />query 3' ACCUUCGGAAACUCCCUCUA 5'	3.5	0.75	ACCUUCGGAAACUCCCUCUA<br />|||o||.||||||.||||||<br />UGGGAGGCUUUGAUGGAGAU
362	pyr-novel-miR-65-5p	Pbr033396.1	4	715-736	target 5' CCUGCCAAUGGAGAUGUUGCAC 3'<br /> ::::::: :::::: ::::::<br />query 3' AGACGGUUUCCUCUA-AACGUG 5'	-	-	-
363	pyr-novel-miR-127-3p	Pbr026704.1	4	596-615	target 5' GA-GGUAGAGGAAAAGAGAGA 3'<br /> :: :..:::.:::::::::: <br />query 3' CUACUGUCUUCUUUUCUCUCG 5'	-	-	-
364	pyr-518	Pbr003792.1	2	662-683	target 5' GGAAUGGGAGGCAUAGGCAAGA 3'<br /> ::::::::::::::::: ::::<br />query 3' CCUUACCCUCCGUAUCCCUUCU 5'	2	0.87	CCUUACCCUCCGUAUCCCUUCU<br />|||||||||||||||||.||||<br />GGAAUGGGAGGCAUAGGCAAGA
365	pyr-4785	Pbr006114.1	4	820-839	target 5' AAGCGGU-ACAUGAGAACACA 3'<br /> ::: ::: :: ::::::::::<br />query 3' UUCCCCACUGGACUCUUGUGU 5'	-	-	-
366	pyr-629	Pbr001412.1	3	159-179	target 5' CAGGGAAACUCUCCUUUGGCU 3'<br /> :::: :::::::::::::: <br />query 3' AUCCCGUUGAGAGGAAACCGU 5'	3	0.76	AUCCCGUUGAGAGGAAACCGU<br />.||||.||||||||||||||.<br />CAGGGAAACUCUCCUUUGGCU
367	pyr-401	Pbr034687.1	4	418-436	target 5' AAUAGGAGGGAU-GGGAAGA 3'<br /> ::: :::::.:: :::::::<br />query 3' UUACCCUCCUUAUCCCUUCU 5'	-	-	-
368	pyr-novel-miR-30-3p	Pbr038354.1	4	1118-1138	target 5' AUUCCCAGAAGAAAAGAGAGC 3'<br /> : ::::::::::::::::<br />query 3' CUACUGUCUUCUUUUCUCUCG 5'	-	-	-
369	pyr-166	Pbr008910.2	1.5	960-981	target 5' GGGAUGGGAGGAAUGGGGAAGA 3'<br /> ::.:::::::::::.:::::::<br />query 3' CCUUACCCUCCUUAUCCCUUCU 5'	1.5	0.98	CCUUACCCUCCUUAUCCCUUCU<br />||o|||||||||||o|||||||<br />GGGAUGGGAGGAAUGGGGAAGA
370	pyr-1395	Pbr016259.1	4	277-295	target 5' GGGCAAAUCUUCUUUGGUA 3'<br /> :::::: :::.::::::.:<br />query 3' CCCGUUAAGAGGAAACCGU 5'	1	0.91	CCCGUUAAGAGGAAACCGU<br />||||||.||||||||||||<br />GGGCAAAUCUCCUUUGGCA
371	pyr-4860	Pbr009955.1	4	547-564	target 5' UAGGA-UCUUUGAGGGAGG 3'<br /> : :.: .:::::::::::.<br />query 3' ACCUUCGGAAACUCCCUCU 5'	-	-	-
372	pyr-novel-miR-30-3p	Pbr002392.1	3	535-556	target 5' GAUGUCAAGAAGAAAAGGGAGC 3'<br /> :::: : ::::::::::.::::<br />query 3' CUACUG-UCUUCUUUUCUCUCG 5'	-	-	-
373	pyr-novel-miR-9-3p	Pbr007161.1	4	297-317	target 5' GUUCGAGAAGGCGAGCGCGUG 3'<br /> ::: ::::::: ::::.::::<br />query 3' CAACCUCUUCCCCUCGUGCAC 5'	-	-	-
374	pyr-317	Pbr009293.1	4	7510-7529	target 5' GAUGAGGAGGUGCAGAUGCA 3'<br /> :: : : :::::::.:::::<br />query 3' CUCCACGUCCACGUUUACGU 5'	-	-	-
375	pyr-4017	Pbr006646.1	4	643-664	target 5' GGAAUGGGCGGAAUGGGGAAGA 3'<br /> :::::::: ::::: ::.::::<br />query 3' CCUUACCCUCCUUAACCUUUCU 5'	-	-	-
376	pyr-317	Pbr030464.1	4	182-200	target 5' GAGGUGCAGGUACAAAU-CA 3'<br /> ::::::::::: ::::: ::<br />query 3' CUCCACGUCCACGUUUACGU 5'	-	-	-
377	pyr-novel-miR-10-3p	Pbr003037.1	3.5	6278-6301	target 5' UCCUCUCCUGAGCUAAUGGAGAGG 3'<br /> :::::::::::.::::::: :::.<br />query 3' AGGAGAGGACUUGAUUACCACUCU 5'	3	0.89	AGGAGAGGACUUGAUUACCACUCU<br />|||||||||||o|||||||.|||o<br />UCCUCUCCUGAGCUAAUGGAGAGG
378	pyr-401	Pbr004599.1	4	699-718	target 5' AAUGGGAGGCAUAGGCAAGA 3'<br /> ::::::::: ::::: ::::<br />query 3' UUACCCUCCUUAUCCCUUCU 5'	-	-	-
379	pyr-4017	Pbr008910.2	3.5	960-981	target 5' GGGAUGGGAGGAAUGGGGAAGA 3'<br /> ::.::::::::::: ::.::::<br />query 3' CCUUACCCUCCUUAACCUUUCU 5'	3.5	0.89	CCUUACCCUCCUUAACCUUUCU<br />||o|||||||||||.||o||||<br />GGGAUGGGAGGAAUGGGGAAGA
380	pyr-novel-miR-30-3p	Pbr021308.1	3.5	193-212	target 5' GAGGA-GGAAGAAGAGAGAGC 3'<br /> :: :: .::::::.:::::::<br />query 3' CUACUGUCUUCUUUUCUCUCG 5'	-	-	-
381	pyr-novel-miR-117-3p	Pbr022573.1	3.5	129-149	target 5' AGGUUCCACCAAACACUUCAA 3'<br /> .::::: :::::::::::: <br />query 3' CUCAAGGGGGUUUGUGAAGUC 5'	-	-	-
382	pyr-4860	Pbr036939.1	0	791-809	target 5' UGGAAGCCUUUGAGGGAGA 3'<br /> :::::::::::::::::::<br />query 3' ACCUUCGGAAACUCCCUCU 5'	0	1.00	ACCUUCGGAAACUCCCUCU<br />|||||||||||||||||||<br />UGGAAGCCUUUGAGGGAGA
383	pyr-novel-miR-127-3p	Pbr014197.1	4	800-819	target 5' GACGGCAG-AGAAAAGAGAGU 3'<br /> :: :.::: :::::::::::.<br />query 3' CUACUGUCUUCUUUUCUCUCG 5'	-	-	-
384	pyr-317	Pbr031563.1	4	3125-3144	target 5' GAGCACCAGGUGCAAAUGCU 3'<br /> ::: ::::::::::::: <br />query 3' CUCCACGUCCACGUUUACGU 5'	-	-	-
385	pyr-401	Pbr001432.2	4	280-299	target 5' AAUGGGAGUAAUGGGGAGGA 3'<br /> :::::::: :::.::::.::<br />query 3' UUACCCUCCUUAUCCCUUCU 5'	-	-	-
386	pyr-4017	Pbr007040.1	4	580-601	target 5' GGUAUUGGAGGAAUUGGUAAGA 3'<br /> :: :: ::::::::::: ::::<br />query 3' CCUUACCCUCCUUAACCUUUCU 5'	-	-	-
387	pyr-novel-miR-79-5p	Pbr003816.1	-	-	-	3		AGACGGUUUCCUCUUAACGUG<br />||||||..||||||||||||.<br />UCUGCC--AGGAGAAUUGCAG
388	pyr-518	Pbr038352.1	3	615-636	target 5' GGCAUGGGAGGCAUUGGGAAGA 3'<br /> :: ::::::::::: :::::::<br />query 3' CCUUACCCUCCGUAUCCCUUCU 5'	3	0.83	CCUUACCCUCCGUAUCCCUUCU<br />||.|||||||||||.|||||||<br />GGCAUGGGAGGCAUUGGGAAGA
389	pyr-4017	Pbr006437.1	4	4395-4416	target 5' AGAAUGCCAGGAGUUGGAAAGA 3'<br /> ::::: ::::.:::::::::<br />query 3' CCUUACCCUCCUUAACCUUUCU 5'	-	-	-
390	pyr-4249	Pbr019737.1	4	266-285	target 5' UUGGA-GGGGAGGCUUAUCGG 3'<br /> .:::: : .:::::::::::.<br />query 3' GACCUACGUCUCCGAAUAGCU 5'	-	-	-
391	pyr-novel-miR-30-3p	Pbr013970.1	4	665-685	target 5' GGCUGCAGAAGAAAAGAGGGC 3'<br /> :. .:::::::::::::.::<br />query 3' CUACUGUCUUCUUUUCUCUCG 5'	-	-	-
392	pyr-novel-miR-144-5p	Pbr018269.1	4	1251-1271	target 5' CCUGCAGUUGGAGAGAAGUCA 3'<br /> ::::: ..::::::::::.: <br />query 3' GGACGGUGACCUCUCUUCGGG 5'	-	-	-
393	pyr-novel-miR-127-3p	Pbr002392.1	3	535-556	target 5' GAUGUCAAGAAGAAAAGGGAGC 3'<br /> :::: : ::::::::::.::::<br />query 3' CUACUG-UCUUCUUUUCUCUCG 5'	-	-	-
394	pyr-1983	Pbr022907.1	4	302-321	target 5' CCAU-CACUGCUUCUUCUCUG 3'<br /> :::: : ::::.:::::.:::<br />query 3' GGUACGAGACGGAGAAGGGAC 5'	-	-	-
395	pyr-novel-miR-131-3p	Pbr002903.1	2	248-268	target 5' CAGGGCAACUCUUCUUUGGCU 3'<br /> ::::::::::::.::::::: <br />query 3' GUCCCGUUGAGAGGAAACCGU 5'	2	0.93	GUCCCGUUGAGAGGAAACCGU<br />||||||||||||o|||||||.<br />CAGGGCAACUCUUCUUUGGCU
396	pyr-166	Pbr040364.1	4	583-604	target 5' GGCAUGGGAGGACUGGGGAAGA 3'<br /> :: ::::::::: :.:::::::<br />query 3' CCUUACCCUCCUUAUCCCUUCU 5'	-	-	-
397	pyr-novel-miR-157-3p	Pbr032486.1	4	2285-2306	target 5' AAGCUAGUAUGUAAUGAGUUCA 3'<br /> :::::::: ::.:::.::::: <br />query 3' UUCGAUCA-ACGUUAUUCAAGC 5'	-	-	-
398	pyr-novel-miR-108-3p	Pbr016259.1	4	104-124	target 5' UAGGGCCGAUCUCCUUUGGCA 3'<br /> .::::: . ::::::::::::<br />query 3' GUCCCGUUGAGAGGAAACCGU 5'	1.5	0.84	GUCCCGUUGAGAGGAAACCGU<br />o|||||||.||||||||||||<br />UAGGGCAAAUCUCCUUUGGCA
399	pyr-novel-miR-108-3p	Pbr025355.1	3.5	3111-3131	target 5' CAGGCCAGCUCUUCUUUGGCU 3'<br /> :::: ::.::::.::::::: <br />query 3' GUCCCGUUGAGAGGAAACCGU 5'	3.5	0.79	GUCCCGUUGAGAGGAAACCGU<br />||||.||o||||o|||||||.<br />CAGGCCAGCUCUUCUUUGGCU
400	pyr-2216	Pbr003032.1	3.5	13-33	target 5' GAGUUCCUCCAAACUCUUCAU 3'<br /> :::::::.:::::: ::::: <br />query 3' CUCAAGGGGGUUUGUGAAGUU 5'	3.5	0.84	CUCAAGGGGGUUUGUGAAGUU<br />|||||||o||||||.|||||.<br />GAGUUCCUCCAAACUCUUCAU
401	pyr-3809	Pbr016259.1	3	329-349	target 5' UAGGGCAAAUCUCCUUUGGCA 3'<br /> ::::::: ::::::::::::<br />query 3' UUCCCGUUGAGAGGAAACCGU 5'	2	0.79	UUCCCGUUGAGAGGAAACCGU<br />.|||||||.||||||||||||<br />UAGGGCAAAUCUCCUUUGGCA
402	pyr-4017	Pbr038336.1	3	4482-4503	target 5' GGAAUGCCAGGAGUUGGAAAGA 3'<br /> :::::: ::::.:::::::::<br />query 3' CCUUACCCUCCUUAACCUUUCU 5'	3	0.77	CCUUACCCUCCUUAACCUUUCU<br />||||||..||||o|||||||||<br />GGAAUGCCAGGAGUUGGAAAGA
403	pyr-4017	Pbr022033.1	3.5	699-720	target 5' GGGAUGGGAGGAAUGGGGAAGA 3'<br /> ::.::::::::::: ::.::::<br />query 3' CCUUACCCUCCUUAACCUUUCU 5'	3.5	0.89	CCUUACCCUCCUUAACCUUUCU<br />||o|||||||||||.||o||||<br />GGGAUGGGAGGAAUGGGGAAGA
404	pyr-753	Pbr010510.1	3	56-76	target 5' UCUCUAACCAUACGACAUUCU 3'<br /> :::: ::::: ::::::::::<br />query 3' AGAGCUUGGUCUGCUGUAAGA 5'	3	0.74	AGAGCUUGGUCUGCUGUAAGA<br />||||.|||||.||||||||||<br />UCUCUAACCAUACGACAUUCU
405	pyr-2781	Pbr016259.1	4	104-124	target 5' UAGGGCCGAUCUCCUUUGGCA 3'<br /> .::::: . ::::::::::::<br />query 3' GUCCCGUUAAGAGGAAACCGU 5'	1.5	0.88	GUCCCGUUAAGAGGAAACCGU<br />o|||||||.||||||||||||<br />UAGGGCAAAUCUCCUUUGGCA
406	pyr-3417	Pbr004907.1	3	1060-1080	target 5' CCGGCAACUCAUUCUUGGCUU 3'<br /> ::::::: ::::.::::::: <br />query 3' GGCCGUUUAGUAGGAACCGAC 5'	3	0.83	GGCCGUUUAGUAGGAACCGAC<br />|||||||.||||o|||||||.<br />CCGGCAACUCAUUCUUGGCUU
407	pyr-novel-miR-108-3p	Pbr020849.1	4	355-374	target 5' CAGGGCAA-UCUCUUUUGGCC 3'<br /> :::::::: ::::.:::::: <br />query 3' GUCCCGUUGAGAGGAAACCGU 5'	-	-	-
408	pyr-4157	Pbr013111.1	4	181-201	target 5' UGGGAAGCUUUUGGGGGAGGA 3'<br /> : ::::::.::::.:::::: <br />query 3' AACCUUCGGAAACUCCCUCCA 5'	3.5	0.84	AACCUUCGGAAACUCCCUCCA<br />|.||||||o||||o||||||.<br />UGGGAAGCUUUUGGGGGAGGA
409	pyr-novel-miR-117-3p	Pbr014657.1	3.5	678-698	target 5' GAGUUCCUCCAAACUCUUCAU 3'<br /> :::::::.:::::: ::::: <br />query 3' CUCAAGGGGGUUUGUGAAGUC 5'	3.5	0.81	CUCAAGGGGGUUUGUGAAGUC<br />|||||||o||||||.|||||.<br />GAGUUCCUCCAAACUCUUCAU
410	pyr-3229	Pbr001985.1	4	341-358	target 5' UUGUAAACCCGACGC-AAC 3'<br /> : :: :::::::::: :::<br />query 3' ACCACUUGGGCUGCGCUUG 5'	-	-	-
411	pyr-novel-miR-117-3p	Pbr020839.1	3	979-999	target 5' GGUUUCCUCCAAACACUUCAA 3'<br /> :. ::::.:::::::::::: <br />query 3' CUCAAGGGGGUUUGUGAAGUC 5'	3	0.75	CUCAAGGGGGUUUGUGAAGUC<br />|o.||||o||||||||||||.<br />GGUUUCCUCCAAACACUUCAA
412	pyr-1983	Pbr037150.1	3.5	110-130	target 5' CCGUCCUCUGCCUCUUCUCUU 3'<br /> ::.: ::::::::::::.:: <br />query 3' GGUACGAGACGGAGAAGGGAC 5'	3.5	0.78	GGUACGAGACGGAGAAGGGAC<br />||o|.||||||||||||o||.<br />CCGUCCUCUGCCUCUUCUCUU
413	pyr-166	Pbr021420.1	4	722-743	target 5' GGAAGAGGAGGAAUGGGGAGGA 3'<br /> :::: ::::::::.::::.::<br />query 3' CCUUACCCUCCUUAUCCCUUCU 5'	-	-	-
414	pyr-1983	Pbr033640.1	4	233-254	target 5' GCACUGCUCUUCCUCUUCCCUG 3'<br /> :: :::::: :::::::::::<br />query 3' GGU-ACGAGACGGAGAAGGGAC 5'	-	-	-
415	pyr-novel-miR-30-3p	Pbr006333.1	3.5	623-642	target 5' GAAGA-AGAAGAAAAGAGGGU 3'<br /> :: :: ::::::::::::.:.<br />query 3' CUACUGUCUUCUUUUCUCUCG 5'	-	-	-
416	pyr-317	Pbr014540.1	4	2650-2670	target 5' GUGGUGGAGGAUGCAAAUGCA 3'<br /> : :::: ::: ::::::::::<br />query 3' CUCCACGUCC-ACGUUUACGU 5'	-	-	-
417	pyr-1677	Pbr012577.1	-	-	-	3		UCCACGUC--CACGUUUACGUCU<br />||||||||...||||||||||||<br />AGGUGCAGCCUUGCAAAUGCAGA
418	pyr-518	Pbr004591.1	2	549-570	target 5' GGAAUGGGAGGCAUAGGCAAGA 3'<br /> ::::::::::::::::: ::::<br />query 3' CCUUACCCUCCGUAUCCCUUCU 5'	2	0.87	CCUUACCCUCCGUAUCCCUUCU<br />|||||||||||||||||.||||<br />GGAAUGGGAGGCAUAGGCAAGA
419	pyr-novel-miR-30-3p	Pbr029065.2	3	456-475	target 5' GGUGGCA-AAGAAGAGAGAGC 3'<br /> :.::.:: :::::.:::::::<br />query 3' CUACUGUCUUCUUUUCUCUCG 5'	-	-	-
420	pyr-novel-miR-84-3p	Pbr003032.1	3.5	13-33	target 5' GAGUUCCUCCAAACUCUUCAU 3'<br /> :::::::.:::::: ::::: <br />query 3' CUCAAGGGGGUUUGUGAAGUC 5'	3.5	0.81	CUCAAGGGGGUUUGUGAAGUC<br />|||||||o||||||.|||||.<br />GAGUUCCUCCAAACUCUUCAU
421	pyr-novel-miR-84-3p	Pbr018861.1	3.5	391-411	target 5' GAGUUCCUCCAAACUCUUCAU 3'<br /> :::::::.:::::: ::::: <br />query 3' CUCAAGGGGGUUUGUGAAGUC 5'	3.5	0.81	CUCAAGGGGGUUUGUGAAGUC<br />|||||||o||||||.|||||.<br />GAGUUCCUCCAAACUCUUCAU
422	pyr-novel-miR-65-3p	Pbr001412.1	4	159-179	target 5' CAGGGAAACUCUCCUUUGGCU 3'<br /> ::::: :: ::::::::::: <br />query 3' GUCCCGUUAAGAGGAAACCGU 5'	3	0.77	GUCCCGUUAAGAGGAAACCGU<br />|||||.||.|||||||||||.<br />CAGGGAAACUCUCCUUUGGCU
423	pyr-novel-miR-17-3p	Pbr004737.1	1.5	795-815	target 5' GAGUUCCUCCAAACACUUCAU 3'<br /> :::::::.:::::::::::: <br />query 3' CUCAAGGGGGUUUGUGAAGUC 5'	1.5	0.89	CUCAAGGGGGUUUGUGAAGUC<br />|||||||o||||||||||||.<br />GAGUUCCUCCAAACACUUCAU
424	pyr-4017	Pbr012793.1	3	583-604	target 5' GGAAUGGGAGGAGUUGGUAAGA 3'<br /> ::::::::::::.:::: ::::<br />query 3' CCUUACCCUCCUUAACCUUUCU 5'	3	0.91	CCUUACCCUCCUUAACCUUUCU<br />||||||||||||o||||.||||<br />GGAAUGGGAGGAGUUGGUAAGA
425	pyr-4218	Pbr012906.1	4	458-476	target 5' UGGGA-UCUUUGAGGGAGGA 3'<br /> :::.: .:::::::::::. <br />query 3' ACCUUCGGAAACUCCCUCUA 5'	-	-	-
426	pyr-novel-miR-127-3p	Pbr021308.1	3.5	193-212	target 5' GAGGA-GGAAGAAGAGAGAGC 3'<br /> :: :: .::::::.:::::::<br />query 3' CUACUGUCUUCUUUUCUCUCG 5'	-	-	-
427	pyr-401	Pbr013012.1	4	627-646	target 5' GAUGGGGGGAAUGGGAAAGA 3'<br /> .:::::.:::::.:: ::::<br />query 3' UUACCCUCCUUAUCCCUUCU 5'	-	-	-
428	pyr-novel-miR-131-3p	Pbr011100.1	3.5	2375-2395	target 5' CAGGCCAGCUCUUCUUUGGCU 3'<br /> :::: ::.::::.::::::: <br />query 3' GUCCCGUUGAGAGGAAACCGU 5'	3.5	0.79	GUCCCGUUGAGAGGAAACCGU<br />||||.||o||||o|||||||.<br />CAGGCCAGCUCUUCUUUGGCU
429	pyr-317	Pbr018134.1	3	7654-7673	target 5' GAGGAGGAGGUGCAGAUGCA 3'<br /> :::: : :::::::.:::::<br />query 3' CUCCACGUCCACGUUUACGU 5'	3	0.81	CUCCACGUCCACGUUUACGU<br />||||.|.|||||||o|||||<br />GAGGAGGAGGUGCAGAUGCA
430	pyr-4693	Pbr002483.1	1	133-153	target 5' AAGCUAGUUGCAAUAAGUUCA 3'<br /> :::::::::::::::::::: <br />query 3' UUCGAUCAACGUUAUUCAAGC 5'	1	0.97	UUCGAUCAACGUUAUUCAAGC<br />||||||||||||||||||||.<br />AAGCUAGUUGCAAUAAGUUCA
431	pyr-2216	Pbr011544.2	3.5	314-334	target 5' CCGUUCUCCUAAACACUUCAA 3'<br /> ::::.::.:::::::::::<br />query 3' CUCAAGGGGGUUUGUGAAGUU 5'	3.5	0.71	CUCAAGGGGGUUUGUGAAGUU<br />..||||o||o|||||||||||<br />CCGUUCUCCUAAACACUUCAA
432	pyr-4157	Pbr000734.1	4	703-723	target 5' CAAGGAGUCUUUGAGGGAGGU 3'<br /> :.::.:::::::::::::<br />query 3' AACCUUCGGAAACUCCCUCCA 5'	-	-	-
433	pyr-3166	Pbr025044.1	3.5	2126-2145	target 5' UCGA-AAAAUCUCUUUUGGCA 3'<br /> .::: :::::::.:::::::<br />query 3' GGCUCGUUUAGAGGAAACCGU 5'	-	-	-
434	pyr-novel-miR-108-3p	Pbr001412.1	2	159-179	target 5' CAGGGAAACUCUCCUUUGGCU 3'<br /> ::::: :::::::::::::: <br />query 3' GUCCCGUUGAGAGGAAACCGU 5'	2	0.85	GUCCCGUUGAGAGGAAACCGU<br />|||||.||||||||||||||.<br />CAGGGAAACUCUCCUUUGGCU
435	pyr-4034	Pbr015708.1	4	34-54	target 5' AAGGGCGACCUGACGAACACA 3'<br /> : ::: ::::::: :::::::<br />query 3' UCCCCACUGGACU-CUUGUGU 5'	-	-	-
436	pyr-novel-miR-34-3p	Pbr016259.1	3.5	104-124	target 5' UAGGGCCGAUCUCCUUUGGCA 3'<br /> . :.:: .:::::::::::::<br />query 3' GGCUCGUUUAGAGGAAACCGU 5'	2	0.82	GGCUCGUUUAGAGGAAACCGU<br />o.|o|||||||||||||||||<br />UAGGGCAAAUCUCCUUUGGCA
437	pyr-317	Pbr008914.1	4	685-704	target 5' GAGGAGCAGCUGCAGAUGCA 3'<br /> :::: :::: ::::.:::::<br />query 3' CUCCACGUCCACGUUUACGU 5'	-	-	-
438	pyr-630	Pbr020849.1	4	355-374	target 5' CAGGGCAA-UCUCUUUUGGCC 3'<br /> :::::::: ::::.:::::: <br />query 3' GUCCCGUUGAGAGGAAACCGU 5'	-	-	-
439	pyr-166	Pbr023185.1	2	466-487	target 5' GGAAUGGGAGGACUAGGGAAGA 3'<br /> :::::::::::: :::::::::<br />query 3' CCUUACCCUCCUUAUCCCUUCU 5'	2	0.92	CCUUACCCUCCUUAUCCCUUCU<br />||||||||||||.|||||||||<br />GGAAUGGGAGGACUAGGGAAGA
440	pyr-1804	Pbr012635.1	4	1059-1080	target 5' GGAUAAUUUUCCUUAUGGCAGA 3'<br /> :: .::::.::::: :::::::<br />query 3' CCCGUUAAGAGGAA-ACCGUCU 5'	-	-	-
441	pyr-401	Pbr023112.3	4	627-646	target 5' GAUGGGGGGAAUGGGAAAGA 3'<br /> .:::::.:::::.:: ::::<br />query 3' UUACCCUCCUUAUCCCUUCU 5'	-	-	-
442	pyr-novel-miR-157-5p	Pbr011532.1	3.5	909-930	target 5' UGUUGAACUUAUUGCAACUGGC 3'<br /> .:::::::::::.:::::.::<br />query 3' CUAACUUGAAUAAUGUUGAUCG 5'	3.5	0.85	CUAACUUGAAUAAUGUUGAUCG<br />.o|||||||||||o|||||o||<br />UGUUGAACUUAUUGCAACUGGC
443	pyr-4693	Pbr008878.1	4	2110-2131	target 5' AAGCUAGUAUGUAAUGAGUUCA 3'<br /> :::::::: ::.:::.::::: <br />query 3' UUCGAUCA-ACGUUAUUCAAGC 5'	-	-	-
444	pyr-novel-miR-30-3p	Pbr029993.1	4	2379-2399	target 5' GAUGAUGGAAGAAGAGAAAGC 3'<br /> :::::..::::::.::: :::<br />query 3' CUACUGUCUUCUUUUCUCUCG 5'	-	-	-
445	pyr-89	Pbr003032.1	2.5	13-33	target 5' GAGUUCCUCCAAACUCUUCAU 3'<br /> :::::::.:::::: ::::::<br />query 3' CUCAAGGGGGUUUGUGAAGUA 5'	2.5	0.85	CUCAAGGGGGUUUGUGAAGUA<br />|||||||o||||||.||||||<br />GAGUUCCUCCAAACUCUUCAU
446	pyr-3330	Pbr025905.1	3.5	2075-2095	target 5' UUGGAAGUCUUUCAGGGAGGU 3'<br /> :::::::.:::: ::::::.:<br />query 3' AACCUUCGGAAACUCCCUCUA 5'	3.5	0.80	AACCUUCGGAAACUCCCUCUA<br />|||||||o||||.||||||o|<br />UUGGAAGUCUUUCAGGGAGGU
447	pyr-4017	Pbr041613.1	4	601-622	target 5' GGCAUGGGAGGACUUGGGAAGA 3'<br /> :: ::::::::: ::::.::::<br />query 3' CCUUACCCUCCUUAACCUUUCU 5'	-	-	-
448	pyr-166	Pbr036417.1	0.5	3127-3148	target 5' GGGAUGGGAGGAAUAGGGAAGA 3'<br /> ::.:::::::::::::::::::<br />query 3' CCUUACCCUCCUUAUCCCUUCU 5'	0.5	0.99	CCUUACCCUCCUUAUCCCUUCU<br />||o|||||||||||||||||||<br />GGGAUGGGAGGAAUAGGGAAGA
449	pyr-518	Pbr038889.1	4	607-628	target 5' GGAUUAGGAGGCAUAGGCAAGA 3'<br /> ::: : ::::::::::: ::::<br />query 3' CCUUACCCUCCGUAUCCCUUCU 5'	-	-	-
450	pyr-1395	Pbr033366.1	4	2238-2257	target 5' AGGCAUAGUCUCCUUUGGCA 3'<br /> :::: : ::::::::::::<br />query 3' CCCGU-UAAGAGGAAACCGU 5'	3	0.71	CCCGU-UAAGAGGAAACCGU<br />.||||.|.||||||||||||<br />AGGCAUAGUCUCCUUUGGCA
451	pyr-4860	Pbr026028.1	4	408-427	target 5' UGUGAAGCCUUUGGUGGAGA 3'<br /> :: ::::::::::. :::::<br />query 3' AC-CUUCGGAAACUCCCUCU 5'	-	-	-
452	pyr-166	Pbr016325.1	3	876-897	target 5' GGAAUGGGAGGAAUGGGGAAAA 3'<br /> ::::::::::::::.::::: :<br />query 3' CCUUACCCUCCUUAUCCCUUCU 5'	3	0.92	CCUUACCCUCCUUAUCCCUUCU<br />||||||||||||||o|||||.|<br />GGAAUGGGAGGAAUGGGGAAAA
453	pyr-518	Pbr004586.1	2	535-556	target 5' GGAAUGGGAGGCAUAGGCAAGA 3'<br /> ::::::::::::::::: ::::<br />query 3' CCUUACCCUCCGUAUCCCUUCU 5'	2	0.87	CCUUACCCUCCGUAUCCCUUCU<br />|||||||||||||||||.||||<br />GGAAUGGGAGGCAUAGGCAAGA
454	pyr-3417	Pbr023838.1	3	1034-1054	target 5' CAGGCAAAUCAUUCUUGGCUU 3'<br /> : ::::::::::.::::::: <br />query 3' GGCCGUUUAGUAGGAACCGAC 5'	3	0.78	GGCCGUUUAGUAGGAACCGAC<br />|.||||||||||o|||||||.<br />CAGGCAAAUCAUUCUUGGCUU
455	pyr-3229	Pbr024390.1	3	907-924	target 5' UUGUGAACCCGACGC-AAC 3'<br /> : ::::::::::::: :::<br />query 3' ACCACUUGGGCUGCGCUUG 5'	-	-	-
456	pyr-novel-miR-127-3p	Pbr033678.1	4	2102-2121	target 5' ACUGA-AAAAGAAAAGAGAGC 3'<br /> ::: : :::::::::::::<br />query 3' CUACUGUCUUCUUUUCUCUCG 5'	-	-	-
457	pyr-novel-miR-127-3p	Pbr031664.1	3.5	222-241	target 5' AAUGACGGAAGAAAA-AGAGC 3'<br /> :::::.:::::::: :::::<br />query 3' CUACUGUCUUCUUUUCUCUCG 5'	-	-	-
458	pyr-4157	Pbr027204.1	2	781-802	target 5' UUGGAAGCCUUUGAGGGAGAGU 3'<br /> ::::::::::::::::::: ::<br />query 3' AACCUUCGGAAACUCCCUC-CA 5'	3	0.92	AACCUUCGGAAACUCCCUCCA<br />|||||||||||||||||||..<br />UUGGAAGCCUUUGAGGGAGAG
459	pyr-novel-miR-30-3p	Pbr032585.3	4	2093-2113	target 5' GAUAACUGAAGAAGAGAGAGA 3'<br /> ::: :: ::::::.:::::: <br />query 3' CUACUGUCUUCUUUUCUCUCG 5'	-	-	-
460	pyr-89	Pbr018761.1	1	352-372	target 5' GAGUUUCUCCAAACACUUCAU 3'<br /> :::::.:.:::::::::::::<br />query 3' CUCAAGGGGGUUUGUGAAGUA 5'	1	0.87	CUCAAGGGGGUUUGUGAAGUA<br />|||||o|o|||||||||||||<br />GAGUUUCUCCAAACACUUCAU
461	pyr-4157	Pbr004064.1	3.5	1997-2017	target 5' UUGGAAUUCUUUCAGGGAGGU 3'<br /> :::::: .:::: ::::::::<br />query 3' AACCUUCGGAAACUCCCUCCA 5'	-	-	-
462	pyr-1816	Pbr035916.1	4	187-208	target 5' AAGGGCGACCUGACGAACACAA 3'<br /> : ::: ::::::: ::::::::<br />query 3' UCCCCACUGGACU-CUUGUGUU 5'	-	-	-
463	pyr-2216	Pbr018275.1	4	1246-1267	target 5' GAUUGUUCUCCAGACACUUCAA 3'<br /> :: : :.:.:::.:::::::::<br />query 3' CUCA-AGGGGGUUUGUGAAGUU 5'	-	-	-
464	pyr-novel-miR-107-3p	Pbr025430.2	3	2-23	target 5' UGAAAGACUUAGCCAAGGAAAG 3'<br /> ::: :::::::::::::::: :<br />query 3' ACUCUCUGAAUCGGUUCCUUCC 5'	3	0.77	ACUCUCUGAAUCGGUUCCUUCC<br />|||.||||||||||||||||.|<br />UGAAAGACUUAGCCAAGGAAAG
465	pyr-317	Pbr006633.1	4	685-704	target 5' GAGGAGCAGCUGCAGAUGCA 3'<br /> :::: :::: ::::.:::::<br />query 3' CUCCACGUCCACGUUUACGU 5'	-	-	-
466	pyr-1395	Pbr001412.1	4	161-179	target 5' GGGAAACUCUCCUUUGGCU 3'<br /> ::: :: ::::::::::: <br />query 3' CCCGUUAAGAGGAAACCGU 5'	3	0.74	CCCGUUAAGAGGAAACCGU<br />|||.||.|||||||||||.<br />GGGAAACUCUCCUUUGGCU
467	pyr-4157	Pbr036939.1	3	790-810	target 5' UUGGAAGCCUUUGAGGGAGAG 3'<br /> ::::::::::::::::::: <br />query 3' AACCUUCGGAAACUCCCUCCA 5'	3	0.92	AACCUUCGGAAACUCCCUCCA<br />|||||||||||||||||||..<br />UUGGAAGCCUUUGAGGGAGAG
468	pyr-1677	Pbr037760.1	4	1576-1596	target 5' AGCUGCAUGUGCAAAGGCAGA 3'<br /> :: :::: ::::::: :::::<br />query 3' UCCACGUCCACGUUUACGUCU 5'	-	-	-
469	pyr-518	Pbr022039.1	3.5	646-667	target 5' GGGAUGGGAGGAAUGGGGAAGA 3'<br /> ::.:::::::: ::.:::::::<br />query 3' CCUUACCCUCCGUAUCCCUUCU 5'	3.5	0.86	CCUUACCCUCCGUAUCCCUUCU<br />||o||||||||.||o|||||||<br />GGGAUGGGAGGAAUGGGGAAGA
470	pyr-3653	Pbr034904.1	3.5	149-169	target 5' UGAAGCUGAGGAUGGAUAGCU 3'<br /> :: :.:: :::::::::::: <br />query 3' ACCUUGAGUCCUACCUAUCGC 5'	3.5	0.74	ACCUUGAGUCCUACCUAUCGC<br />||.|o||.||||||||||||.<br />UGAAGCUGAGGAUGGAUAGCU
471	pyr-401	Pbr002986.1	4	385-404	target 5' AAUGGGAGUAAUGGGGAGGA 3'<br /> :::::::: :::.::::.::<br />query 3' UUACCCUCCUUAUCCCUUCU 5'	-	-	-
472	pyr-1816	Pbr011465.1	4	37-57	target 5' ACCGGUCACCUGAGAACACGA 3'<br /> : ::: ::::::::::::.:<br />query 3' UCCCCACUGGACUCUUGUGUU 5'	-	-	-
473	pyr-4249	Pbr016107.1	3.5	2069-2088	target 5' AUGUGU-CAGAGGCUUAUCGA 3'<br /> :: .: ::::::::::::::<br />query 3' GACCUACGUCUCCGAAUAGCU 5'	-	-	-
474	pyr-1677	Pbr026990.1	-	-	-	3		UCCACGUC--CACGUUUACGUCU<br />||||||||...||||||||||||<br />AGGUGCAGCCUUGCAAAUGCAGA
475	pyr-4011	Pbr009275.1	4	256-276	target 5' GGGUUUCGCCAAACGCUUCAU 3'<br /> ::::..: ::::::.::::: <br />query 3' CCCAGGGGGGUUUGUGAAGUC 5'	-	-	-
476	pyr-2609	Pbr006007.1	4	489-508	target 5' GA-AUCAAGCUGGGAGCUUCA 3'<br /> :: :::: ::::: :::::::<br />query 3' CUCUAGUACGACCGUCGAAGU 5'	-	-	-
477	pyr-2609	Pbr013095.1	4	1241-1260	target 5' GAGAU-AUGUUGGCAUCUUCA 3'<br /> ::::: :::.::::: :::::<br />query 3' CUCUAGUACGACCGUCGAAGU 5'	-	-	-
478	pyr-novel-miR-127-3p	Pbr006333.1	3.5	623-642	target 5' GAAGA-AGAAGAAAAGAGGGU 3'<br /> :: :: ::::::::::::.:.<br />query 3' CUACUGUCUUCUUUUCUCUCG 5'	-	-	-
479	pyr-401	Pbr004591.1	4	551-570	target 5' AAUGGGAGGCAUAGGCAAGA 3'<br /> ::::::::: ::::: ::::<br />query 3' UUACCCUCCUUAUCCCUUCU 5'	-	-	-
480	pyr-novel-miR-84-3p	Pbr034014.5	3	928-948	target 5' GGUUUCCUCCAAACACUUCAA 3'<br /> :. ::::.:::::::::::: <br />query 3' CUCAAGGGGGUUUGUGAAGUC 5'	3	0.75	CUCAAGGGGGUUUGUGAAGUC<br />|o.||||o||||||||||||.<br />GGUUUCCUCCAAACACUUCAA
481	pyr-401	Pbr014405.1	3.5	3466-3485	target 5' GAUGGAAGGGAUAGGGGAGA 3'<br /> .:::: :::.::::::.:::<br />query 3' UUACCCUCCUUAUCCCUUCU 5'	3.5	0.82	UUACCCUCCUUAUCCCUUCU<br />o||||.|||o||||||o|||<br />GAUGGAAGGGAUAGGGGAGA
482	pyr-4034	Pbr040252.1	4	118-137	target 5' AGGCGUCACUUGAGAACACU 3'<br /> ::: :: ::.::::::::: <br />query 3' UCCCCACUGGACUCUUGUGU 5'	-	-	-
483	pyr-novel-miR-84-3p	Pbr028018.1	3.5	966-985	target 5' GAG-UGCUCUAAACACUUCAG 3'<br /> ::: : :.:.:::::::::::<br />query 3' CUCAAGGGGGUUUGUGAAGUC 5'	-	-	-
484	pyr-1613	Pbr038836.1	4	873-893	target 5' ACGUAAAGCAUCCUUGGCUCG 3'<br /> : :.:: ::::::::::::.<br />query 3' UCCGUUCAGUAGGAACCGAGU 5'	-	-	-
485	pyr-novel-miR-17-3p	Pbr003032.1	3.5	13-33	target 5' GAGUUCCUCCAAACUCUUCAU 3'<br /> :::::::.:::::: ::::: <br />query 3' CUCAAGGGGGUUUGUGAAGUC 5'	3.5	0.81	CUCAAGGGGGUUUGUGAAGUC<br />|||||||o||||||.|||||.<br />GAGUUCCUCCAAACUCUUCAU
486	pyr-4011	Pbr034014.5	3	928-948	target 5' GGUUUCCUCCAAACACUUCAA 3'<br /> :: :.::.:::::::::::: <br />query 3' CCCAGGGGGGUUUGUGAAGUC 5'	3	0.73	CCCAGGGGGGUUUGUGAAGUC<br />||.|o||o||||||||||||.<br />GGUUUCCUCCAAACACUUCAA
487	pyr-1395	Pbr023518.1	3.5	1105-1124	target 5' GGGUAAGUUCUCCUUUGACA 3'<br /> :::.:: :::::::::: ::<br />query 3' CCCGUU-AAGAGGAAACCGU 5'	-	-	-
488	pyr-4017	Pbr019096.1	4	598-619	target 5' GGUAUGGCUGGAGUUGGAAAGA 3'<br /> :: :::: :::.:::::::::<br />query 3' CCUUACCCUCCUUAACCUUUCU 5'	-	-	-
489	pyr-166	Pbr019924.1	1.5	631-652	target 5' GGGAUGGGAGGAAUGGGGAAGA 3'<br /> ::.:::::::::::.:::::::<br />query 3' CCUUACCCUCCUUAUCCCUUCU 5'	1.5	0.98	CCUUACCCUCCUUAUCCCUUCU<br />||o|||||||||||o|||||||<br />GGGAUGGGAGGAAUGGGGAAGA
490	pyr-401	Pbr021420.1	4	724-743	target 5' AAGAGGAGGAAUGGGGAGGA 3'<br /> :: ::::::::.::::.::<br />query 3' UUACCCUCCUUAUCCCUUCU 5'	-	-	-
491	pyr-novel-miR-127-3p	Pbr036296.1	4	3302-3321	target 5' GAAGA-AGAAGAAGAGAGAGA 3'<br /> :: :: :::::::.:::::: <br />query 3' CUACUGUCUUCUUUUCUCUCG 5'	-	-	-
492	pyr-novel-miR-137-5p	Pbr036615.1	4	888-910	target 5' AAUGAUUGGGAGUCUUUGUGGGA 3'<br /> ::: ::::::::.::::: ::::<br />query 3' UUA-UAACCCUCGGAAACUCCCU 5'	-	-	-
493	pyr-novel-miR-127-3p	Pbr032585.3	4	2093-2113	target 5' GAUAACUGAAGAAGAGAGAGA 3'<br /> ::: :: ::::::.:::::: <br />query 3' CUACUGUCUUCUUUUCUCUCG 5'	-	-	-
494	pyr-novel-miR-18-3p	Pbr001239.1	4	595-614	target 5' AAGCAAG-UGCAACAAGUUCA 3'<br /> :::: :: ::::: :::::::<br />query 3' UUCGAUCAACGUUAUUCAAGU 5'	-	-	-
495	pyr-novel-miR-127-3p	Pbr004109.1	4	670-690	target 5' GGCUGCAGAAGAAAAGAGGGC 3'<br /> :. .:::::::::::::.::<br />query 3' CUACUGUCUUCUUUUCUCUCG 5'	-	-	-
496	pyr-novel-miR-127-3p	Pbr008824.1	4	166-186	target 5' GAAGACGGUAGAAAAGAGAGU 3'<br /> :: :::.: :::::::::::.<br />query 3' CUACUGUCUUCUUUUCUCUCG 5'	3	0.75	CUACUGUCUUCUUUUCUCUCG<br />||.|||o|.|||||||||||o<br />GAAGACGGUAGAAAAGAGAGU
497	pyr-novel-miR-117-3p	Pbr009275.1	4	256-276	target 5' GGGUUUCGCCAAACGCUUCAU 3'<br /> :.:::.: ::::::.::::: <br />query 3' CUCAAGGGGGUUUGUGAAGUC 5'	-	-	-
498	pyr-518	Pbr023183.1	4	583-604	target 5' GGAAUGGGAGGACUAGGGAAGA 3'<br /> ::::::::::: :::::::::<br />query 3' CCUUACCCUCCGUAUCCCUUCU 5'	-	-	-
499	pyr-4860	Pbr004812.1	4	164-181	target 5' UAGAA-CGUUUGAGGGAGA 3'<br /> : ::: : :::::::::::<br />query 3' ACCUUCGGAAACUCCCUCU 5'	-	-	-
500	pyr-629	Pbr016259.1	3.5	104-124	target 5' UAGGGCCGAUCUCCUUUGGCA 3'<br /> :::::: . ::::::::::::<br />query 3' AUCCCGUUGAGAGGAAACCGU 5'	1	0.88	AUCCCGUUGAGAGGAAACCGU<br />||||||||.||||||||||||<br />UAGGGCAAAUCUCCUUUGGCA
501	pyr-4860	Pbr041598.1	4	88-106	target 5' UGGAGGUCUUAGAGGGAGG 3'<br /> ::::.:.::: :::::::.<br />query 3' ACCUUCGGAAACUCCCUCU 5'	-	-	-
502	pyr-89	Pbr018861.1	2.5	391-411	target 5' GAGUUCCUCCAAACUCUUCAU 3'<br /> :::::::.:::::: ::::::<br />query 3' CUCAAGGGGGUUUGUGAAGUA 5'	2.5	0.85	CUCAAGGGGGUUUGUGAAGUA<br />|||||||o||||||.||||||<br />GAGUUCCUCCAAACUCUUCAU
503	pyr-4249	Pbr028707.1	3	1127-1147	target 5' CUGUUUGCAGAGGCUUAUUGA 3'<br /> ::: :::::::::::::.::<br />query 3' GACCUACGUCUCCGAAUAGCU 5'	3	0.81	GACCUACGUCUCCGAAUAGCU<br />|||..|||||||||||||o||<br />CUGUUUGCAGAGGCUUAUUGA
504	pyr-4017	Pbr013012.1	3	625-646	target 5' GGGAUGGGGGGAAUGGGAAAGA 3'<br /> ::.:::::.::::: :::::::<br />query 3' CCUUACCCUCCUUAACCUUUCU 5'	3	0.88	CCUUACCCUCCUUAACCUUUCU<br />||o|||||o|||||.|||||||<br />GGGAUGGGGGGAAUGGGAAAGA
505	pyr-novel-miR-84-3p	Pbr032823.1	4	391-410	target 5' GAGAU-GCUCAAACACUUCAG 3'<br /> ::: : :.::::::::::::<br />query 3' CUCAAGGGGGUUUGUGAAGUC 5'	-	-	-
506	pyr-novel-miR-30-3p	Pbr027461.1	3.5	92-111	target 5' AAUGGC-CAAGAAAAGAGAGC 3'<br /> :::.: :::::::::::::<br />query 3' CUACUGUCUUCUUUUCUCUCG 5'	-	-	-
507	pyr-1816	Pbr032267.1	3	881-900	target 5' AGGGCUG-CCUGGGAACACAA 3'<br /> :::: :: ::::.::::::::<br />query 3' UCCCCACUGGACUCUUGUGUU 5'	3	0.75	UCCCCACUGGACUCUUGUGUU<br />||||.||.||||o||||||||<br />AGGGCUG-CCUGGGAACACAA
508	pyr-4017	Pbr023986.1	2	352-373	target 5' GGAAUGGGUGGGAUUGGAAAGA 3'<br /> :::::::: ::.::::::::::<br />query 3' CCUUACCCUCCUUAACCUUUCU 5'	2	0.90	CCUUACCCUCCUUAACCUUUCU<br />||||||||.||o||||||||||<br />GGAAUGGGUGGGAUUGGAAAGA
509	pyr-835	Pbr031046.1	4	88-109	target 5' GUUAGGGGGAAGAGAAGUGAGC 3'<br /> :.: . .:.:::::::::::::<br />query 3' CGACUGUCUUUCUCUUCACUCG 5'	-	-	-
510	pyr-89	Pbr009275.1	3	256-276	target 5' GGGUUUCGCCAAACGCUUCAU 3'<br /> :.:::.: ::::::.::::::<br />query 3' CUCAAGGGGGUUUGUGAAGUA 5'	3	0.82	CUCAAGGGGGUUUGUGAAGUA<br />|o|||o|.||||||o||||||<br />GGGUUUCGCCAAACGCUUCAU
511	pyr-1395	Pbr000716.1	4	1598-1615	target 5' UUGC-AUUUUCCUUUGGCA 3'<br /> :: :::.::::::::::<br />query 3' CCCGUUAAGAGGAAACCGU 5'	-	-	-
512	pyr-4860	Pbr016455.1	4	408-427	target 5' UGUGAAGCCUUUGGUGGAGA 3'<br /> :: ::::::::::. :::::<br />query 3' AC-CUUCGGAAACUCCCUCU 5'	-	-	-
513	pyr-401	Pbr039108.1	3.5	811-829	target 5' AAUGCGAGGAA-AGGGAAGG 3'<br /> :::: :::::: :::::::.<br />query 3' UUACCCUCCUUAUCCCUUCU 5'	-	-	-
514	pyr-1677	Pbr014183.1	-	-	-	3		UCCACGUC--CACGUUUACGUCU<br />||||||||...||||||||||||<br />AGGUGCAGCUUUGCAAAUGCAGA
515	pyr-1557	Pbr020839.1	3	979-999	target 5' GGUUUCCUCCAAACACUUCAA 3'<br /> :. ::::.:::::::::::: <br />query 3' CUCAAGGGGGUUUGUGAAGUG 5'	3	0.76	CUCAAGGGGGUUUGUGAAGUG<br />|o.||||o||||||||||||.<br />GGUUUCCUCCAAACACUUCAA
516	pyr-novel-miR-127-3p	Pbr015908.1	4	180-199	target 5' GAUGA-AGAAGAAGAGAGGGA 3'<br /> ::::: :::::::.::::.: <br />query 3' CUACUGUCUUCUUUUCUCUCG 5'	-	-	-
517	pyr-317	Pbr000995.1	4	626-644	target 5' GAGG-GCAGAUGCAGAUGCA 3'<br /> :::: :::: ::::.:::::<br />query 3' CUCCACGUCCACGUUUACGU 5'	-	-	-
518	pyr-4860	Pbr002497.1	4	121-140	target 5' UGUGAAGCUUUUGAGGGUGA 3'<br /> :: :::::.:::::::: ::<br />query 3' AC-CUUCGGAAACUCCCUCU 5'	-	-	-
519	pyr-1557	Pbr039312.1	2	199-219	target 5' GAGUUCACCCAAACACUUCAA 3'<br /> :::::: ::::::::::::: <br />query 3' CUCAAGGGGGUUUGUGAAGUG 5'	2	0.82	CUCAAGGGGGUUUGUGAAGUG<br />||||||.|||||||||||||.<br />GAGUUCACCCAAACACUUCAA
520	pyr-518	Pbr017278.1	4	613-634	target 5' GGAAUGGGAGGCAUCGGAAAGA 3'<br /> :::::::::::::: :: ::::<br />query 3' CCUUACCCUCCGUAUCCCUUCU 5'	-	-	-
521	pyr-novel-miR-46-3p	Pbr018761.1	2	352-372	target 5' GAGUUUCUCCAAACACUUCAU 3'<br /> :::::.:.:::::::::::: <br />query 3' CUCAAGGGGGUUUGUGAAGUC 5'	2	0.83	CUCAAGGGGGUUUGUGAAGUC<br />|||||o|o||||||||||||.<br />GAGUUUCUCCAAACACUUCAU
522	pyr-4860	Pbr011556.1	3	674-692	target 5' UAAAAGCUUUUGAGGGAGA 3'<br /> : ::::.:::::::::::<br />query 3' ACCUUCGGAAACUCCCUCU 5'	3	0.72	ACCUUCGGAAACUCCCUCU<br />|..||||o|||||||||||<br />UAAAAGCUUUUGAGGGAGA
523	pyr-4017	Pbr029065.2	4	378-399	target 5' GGAAUCUGAGGAAUUGGAAGGC 3'<br /> ::::: ::::::::::::.: <br />query 3' CCUUACCCUCCUUAACCUUUCU 5'	-	-	-
524	pyr-4785	Pbr027648.1	3	603-623	target 5' CAGGGGCAACCUGAGAACACA 3'<br /> ::::: :::::::::::::<br />query 3' UUCCCCACUGGACUCUUGUGU 5'	3	0.75	UUCCCCACUGGACUCUUGUGU<br />.|||||..|||||||||||||<br />CAGGGGCAACCUGAGAACACA
525	pyr-2781	Pbr020849.1	4	355-374	target 5' CAGGGCAA-UCUCUUUUGGCC 3'<br /> :::::::: ::::.:::::: <br />query 3' GUCCCGUUAAGAGGAAACCGU 5'	-	-	-
526	pyr-4860	Pbr026481.1	4	2115-2134	target 5' UUGAAGUCCUUUGUGGGAGA 3'<br /> : :::: :::::: ::::::<br />query 3' ACCUUC-GGAAACUCCCUCU 5'	-	-	-
527	pyr-401	Pbr035743.1	3	1914-1934	target 5' GGUGGUGAGGAAUGGGGAAGA 3'<br /> ..::: :::::::.:::::::<br />query 3' UUACC-CUCCUUAUCCCUUCU 5'	-	-	-
528	pyr-3417	Pbr006945.1	3	2263-2283	target 5' GCGGCAAUUCAUUCUUGGCUG 3'<br /> :::::: ::::.::::::::<br />query 3' GGCCGUUUAGUAGGAACCGAC 5'	3	0.79	GGCCGUUUAGUAGGAACCGAC<br />.||||||.||||o||||||||<br />GCGGCAAUUCAUUCUUGGCUG
529	pyr-4011	Pbr020839.1	3	979-999	target 5' GGUUUCCUCCAAACACUUCAA 3'<br /> :: :.::.:::::::::::: <br />query 3' CCCAGGGGGGUUUGUGAAGUC 5'	3	0.73	CCCAGGGGGGUUUGUGAAGUC<br />||.|o||o||||||||||||.<br />GGUUUCCUCCAAACACUUCAA
530	pyr-1395	Pbr029501.1	4	628-646	target 5' GACCAAUUCUCCUUUGGAA 3'<br /> : :::::::::::::: :<br />query 3' CCCGUUAAGAGGAAACCGU 5'	-	-	-
531	pyr-518	Pbr042633.1	4	1663-1684	target 5' GGGAUUGGGGGCAUAGGAAAGA 3'<br /> ::.:: ::.:::::::: ::::<br />query 3' CCUUACCCUCCGUAUCCCUUCU 5'	-	-	-
532	pyr-630	Pbr001412.1	2	159-179	target 5' CAGGGAAACUCUCCUUUGGCU 3'<br /> ::::: :::::::::::::: <br />query 3' GUCCCGUUGAGAGGAAACCGU 5'	2	0.85	GUCCCGUUGAGAGGAAACCGU<br />|||||.||||||||||||||.<br />CAGGGAAACUCUCCUUUGGCU
533	pyr-novel-miR-30-3p	Pbr029255.1	3.5	340-359	target 5' GA-GGUAGAAGAAGAGAGAGU 3'<br /> :: :..:::::::.::::::.<br />query 3' CUACUGUCUUCUUUUCUCUCG 5'	-	-	-
534	pyr-4017	Pbr015634.1	4	595-616	target 5' GGAAGGGGAGGAGUUGGUAAGA 3'<br /> :::: :::::::.:::: ::::<br />query 3' CCUUACCCUCCUUAACCUUUCU 5'	-	-	-
535	pyr-4614	Pbr027204.1	2	777-798	target 5' AAUAUUGGAAGCCUUUGAGGGA 3'<br /> :::::::: ::::.::::::::<br />query 3' UUAUAACCCUCGGGAACUCCCU 5'	2	0.81	UUAUAACCCUCGGGAACUCCCU<br />||||||||.||||o||||||||<br />AAUAUUGGAAGCCUUUGAGGGA
536	pyr-novel-miR-117-3p	Pbr028018.1	3.5	966-985	target 5' GAG-UGCUCUAAACACUUCAG 3'<br /> ::: : :.:.:::::::::::<br />query 3' CUCAAGGGGGUUUGUGAAGUC 5'	-	-	-
537	pyr-401	Pbr004586.1	4	537-556	target 5' AAUGGGAGGCAUAGGCAAGA 3'<br /> ::::::::: ::::: ::::<br />query 3' UUACCCUCCUUAUCCCUUCU 5'	-	-	-
538	pyr-89	Pbr034014.5	3	928-948	target 5' GGUUUCCUCCAAACACUUCAA 3'<br /> :. ::::.:::::::::::: <br />query 3' CUCAAGGGGGUUUGUGAAGUA 5'	3	0.78	CUCAAGGGGGUUUGUGAAGUA<br />|o.||||o||||||||||||.<br />GGUUUCCUCCAAACACUUCAA
539	pyr-4157	Pbr012906.1	4	457-476	target 5' CUGGGA-UCUUUGAGGGAGGA 3'<br /> :::.: .:::::::::::: <br />query 3' AACCUUCGGAAACUCCCUCCA 5'	-	-	-
540	pyr-1983	Pbr013105.1	4	186-205	target 5' CUCUGCUUU-CCUCUUCCCUG 3'<br /> :. ::::.: :::::::::::<br />query 3' GGUACGAGACGGAGAAGGGAC 5'	-	-	-
541	pyr-1983	Pbr019261.1	4	59-78	target 5' CCCU-CUCUGUCUCUUCCCUU 3'<br /> :: : :::::.::::::::: <br />query 3' GGUACGAGACGGAGAAGGGAC 5'	-	-	-
542	pyr-1677	Pbr026997.1	-	-	-	3		UCCACGUC--CACGUUUACGUCU<br />||||||||...||||||||||||<br />AGGUGCAGCCUUGCAAAUGCAGA
543	pyr-novel-miR-127-3p	Pbr029255.1	3.5	340-359	target 5' GA-GGUAGAAGAAGAGAGAGU 3'<br /> :: :..:::::::.::::::.<br />query 3' CUACUGUCUUCUUUUCUCUCG 5'	-	-	-
544	pyr-166	Pbr023183.1	2	583-604	target 5' GGAAUGGGAGGACUAGGGAAGA 3'<br /> :::::::::::: :::::::::<br />query 3' CCUUACCCUCCUUAUCCCUUCU 5'	2	0.92	CCUUACCCUCCUUAUCCCUUCU<br />||||||||||||.|||||||||<br />GGAAUGGGAGGACUAGGGAAGA
545	pyr-novel-miR-117-3p	Pbr034014.5	3	928-948	target 5' GGUUUCCUCCAAACACUUCAA 3'<br /> :. ::::.:::::::::::: <br />query 3' CUCAAGGGGGUUUGUGAAGUC 5'	3	0.75	CUCAAGGGGGUUUGUGAAGUC<br />|o.||||o||||||||||||.<br />GGUUUCCUCCAAACACUUCAA
546	pyr-401	Pbr015472.1	4	874-893	target 5' ACUGGGAGGGAUAAGGAAGA 3'<br /> : :::::::.::: ::::::<br />query 3' UUACCCUCCUUAUCCCUUCU 5'	-	-	-
547	pyr-novel-miR-18-3p	Pbr029848.1	3.5	1391-1410	target 5' AAGCUGGUUGCAA-GAGUUCA 3'<br /> :::::.::::::: .::::::<br />query 3' UUCGAUCAACGUUAUUCAAGU 5'	3.5	0.87	UUCGAUCAACGUUAUUCAAGU<br />|||||o|||||||.o||||||<br />AAGCUGGUUGCAA-GAGUUCA
548	pyr-1804	Pbr016259.1	4	331-351	target 5' GGGCAAAUCUCCUUUGGCAUU 3'<br /> :::::: :::::::::::: <br />query 3' CCCGUUAAGAGGAAACCGUCU 5'	-	-	-
549	pyr-novel-miR-30-3p	Pbr036296.1	4	3302-3321	target 5' GAAGA-AGAAGAAGAGAGAGA 3'<br /> :: :: :::::::.:::::: <br />query 3' CUACUGUCUUCUUUUCUCUCG 5'	-	-	-
550	pyr-317	Pbr030433.1	4	47-66	target 5' GAGGUGCAGGUGCUGGUGCA 3'<br /> ::::::::::::: ..::::<br />query 3' CUCCACGUCCACGUUUACGU 5'	-	-	-
551	pyr-novel-miR-30-3p	Pbr001531.1	3.5	355-375	target 5' GAGGAGGGAAGAAAAGAGAGA 3'<br /> :: :: .::::::::::::: <br />query 3' CUACUGUCUUCUUUUCUCUCG 5'	3.5	0.78	CUACUGUCUUCUUUUCUCUCG<br />||.||.o|||||||||||||.<br />GAGGAGGGAAGAAAAGAGAGA
552	pyr-1677	Pbr038385.1	3.5	726-746	target 5' UGGUGCAAGUGCAAGUGCAGG 3'<br /> :::::: ::::::.:::::.<br />query 3' UCCACGUCCACGUUUACGUCU 5'	3.5	0.76	UCCACGUCCACGUUUACGUCU<br />.||||||.||||||o|||||o<br />UGGUGCAAGUGCAAGUGCAGG
553	pyr-4249	Pbr025895.1	3	3253-3274	target 5' CUGGAUGCAGAGGUGUUAUCGA 3'<br /> :::::::::::::. :::::::<br />query 3' GACCUACGUCUCCG-AAUAGCU 5'	-	-	-
554	pyr-4860	Pbr029136.1	4	766-784	target 5' UUCAAGCCUUUUAGGGAGA 3'<br /> : :::::::: :::::::<br />query 3' ACCUUCGGAAACUCCCUCU 5'	-	-	-
555	pyr-870	Pbr000716.1	4	1596-1615	target 5' CCUUGC-AUUUUCCUUUGGCA 3'<br /> :: :: :::.::::::::::<br />query 3' GGCCCGUUAAGAGGAAACCGU 5'	-	-	-
556	pyr-novel-miR-79-3p	Pbr001412.1	4	159-179	target 5' CAGGGAAACUCUCCUUUGGCU 3'<br /> ::::: :: ::::::::::: <br />query 3' GUCCCGUUAAGAGGAAACCGU 5'	3	0.77	GUCCCGUUAAGAGGAAACCGU<br />|||||.||.|||||||||||.<br />CAGGGAAACUCUCCUUUGGCU
557	pyr-1395	Pbr020849.1	4	357-374	target 5' GGGCAA-UCUCUUUUGGCC 3'<br /> :::::: ::::.:::::: <br />query 3' CCCGUUAAGAGGAAACCGU 5'	-	-	-
558	pyr-518	Pbr004519.1	3	535-556	target 5' GGAAUGGGUGGCAUAGGCAAGA 3'<br /> :::::::: :::::::: ::::<br />query 3' CCUUACCCUCCGUAUCCCUUCU 5'	3	0.79	CCUUACCCUCCGUAUCCCUUCU<br />||||||||.||||||||.||||<br />GGAAUGGGUGGCAUAGGCAAGA
559	pyr-novel-miR-107-5p	Pbr025430.2	3	212-233	target 5' GCCCUUCCUUGGCUAAGUCUCU 3'<br /> ::: :::::::::::::::: :<br />query 3' CGGAAAGGAACCGAUUCAGAAA 5'	3	0.89	CGGAAAGGAACCGAUUCAGAAA<br />|||.||||||||||||||||.|<br />GCCCUUCCUUGGCUAAGUCUCU
560	pyr-novel-miR-17-3p	Pbr022573.1	3.5	129-149	target 5' AGGUUCCACCAAACACUUCAA 3'<br /> .::::: :::::::::::: <br />query 3' CUCAAGGGGGUUUGUGAAGUC 5'	-	-	-
561	pyr-4860	Pbr032804.1	2	497-515	target 5' UGGAAGCCUUGGAGGGAGA 3'<br /> :::::::::: ::::::::<br />query 3' ACCUUCGGAAACUCCCUCU 5'	2	0.91	ACCUUCGGAAACUCCCUCU<br />||||||||||.||||||||<br />UGGAAGCCUUGGAGGGAGA
562	pyr-1557	Pbr003032.1	3	13-33	target 5' GAGUUCCUCCAAACUCUUCAU 3'<br /> :::::::.:::::: :::::.<br />query 3' CUCAAGGGGGUUUGUGAAGUG 5'	3	0.82	CUCAAGGGGGUUUGUGAAGUG<br />|||||||o||||||.|||||o<br />GAGUUCCUCCAAACUCUUCAU
563	pyr-novel-miR-49-3p	Pbr034604.1	3.5	1463-1483	target 5' CUGAUCAGGU-UCCUUUGGCAG 3'<br /> :::: :::.: :::::::::::<br />query 3' GACUCGUCUAGAGGAAACCGUC 5'	-	-	-
564	pyr-novel-miR-127-3p	Pbr030803.1	4	165-184	target 5' GAUGA-AGAAGAAGAGAGGGA 3'<br /> ::::: :::::::.::::.: <br />query 3' CUACUGUCUUCUUUUCUCUCG 5'	-	-	-
565	pyr-317	Pbr027260.1	4	685-704	target 5' GAGGAGCAGCUGCAGAUGCA 3'<br /> :::: :::: ::::.:::::<br />query 3' CUCCACGUCCACGUUUACGU 5'	-	-	-
566	pyr-4218	Pbr011556.1	4	674-693	target 5' UAAAAGCUUUUGAGGGAGAA 3'<br /> : ::::.::::::::::: <br />query 3' ACCUUCGGAAACUCCCUCUA 5'	3.5	0.72	ACCUUCGGAAACUCCCUCUA<br />|..||||o|||||||||||.<br />UAAAAGCUUUUGAGGGAGAA
567	pyr-novel-miR-17-3p	Pbr032823.1	4	391-410	target 5' GAGAU-GCUCAAACACUUCAG 3'<br /> ::: : :.::::::::::::<br />query 3' CUCAAGGGGGUUUGUGAAGUC 5'	-	-	-
568	pyr-2216	Pbr000554.1	3.5	1095-1115	target 5' AAGUAUCACCAAACACUUCAA 3'<br /> ::: .: :::::::::::::<br />query 3' CUCAAGGGGGUUUGUGAAGUU 5'	-	-	-
569	pyr-3330	Pbr032804.1	3	496-516	target 5' UUGGAAGCCUUGGAGGGAGAA 3'<br /> ::::::::::: :::::::: <br />query 3' AACCUUCGGAAACUCCCUCUA 5'	3	0.91	AACCUUCGGAAACUCCCUCUA<br />|||||||||||.||||||||.<br />UUGGAAGCCUUGGAGGGAGAA
570	pyr-4860	Pbr031577.1	4	223-242	target 5' UGUGAAGCUUUUGAGGGUGA 3'<br /> :: :::::.:::::::: ::<br />query 3' AC-CUUCGGAAACUCCCUCU 5'	-	-	-
571	pyr-4218	Pbr035826.1	4	346-364	target 5' UGGAAGCCAUUGA-GGAGAU 3'<br /> :::::::: :::: ::::::<br />query 3' ACCUUCGGAAACUCCCUCUA 5'	-	-	-
572	pyr-166	Pbr022033.1	1.5	699-720	target 5' GGGAUGGGAGGAAUGGGGAAGA 3'<br /> ::.:::::::::::.:::::::<br />query 3' CCUUACCCUCCUUAUCCCUUCU 5'	1.5	0.98	CCUUACCCUCCUUAUCCCUUCU<br />||o|||||||||||o|||||||<br />GGGAUGGGAGGAAUGGGGAAGA
573	pyr-3330	Pbr005748.1	4	88-107	target 5' UUCCAAG-UUUUGAGGGAGAU 3'<br /> :: ::: .::::::::::::<br />query 3' AACCUUCGGAAACUCCCUCUA 5'	-	-	-
574	pyr-novel-miR-17-3p	Pbr009275.1	4	256-276	target 5' GGGUUUCGCCAAACGCUUCAU 3'<br /> :.:::.: ::::::.::::: <br />query 3' CUCAAGGGGGUUUGUGAAGUC 5'	-	-	-
575	pyr-novel-miR-127-3p	Pbr027461.1	3.5	92-111	target 5' AAUGGC-CAAGAAAAGAGAGC 3'<br /> :::.: :::::::::::::<br />query 3' CUACUGUCUUCUUUUCUCUCG 5'	-	-	-
576	pyr-4011	Pbr004737.1	3	795-815	target 5' GAGUUCCUCCAAACACUUCAU 3'<br /> : ::.::.:::::::::::: <br />query 3' CCCAGGGGGGUUUGUGAAGUC 5'	3	0.72	CCCAGGGGGGUUUGUGAAGUC<br />|.||o||o||||||||||||.<br />GAGUUCCUCCAAACACUUCAU
577	pyr-4218	Pbr000734.1	4	704-723	target 5' AAGGAGUCUUUGAGGGAGGU 3'<br /> :.::.:::::::::::.:<br />query 3' ACCUUCGGAAACUCCCUCUA 5'	-	-	-
578	pyr-166	Pbr041167.1	3.5	787-808	target 5' GGGAUGUCUGGAAUAGGGAAGA 3'<br /> ::.::: :::::::::::::<br />query 3' CCUUACCCUCCUUAUCCCUUCU 5'	3.5	0.75	CCUUACCCUCCUUAUCCCUUCU<br />||o|||...|||||||||||||<br />GGGAUGUCUGGAAUAGGGAAGA
579	pyr-4034	Pbr027648.1	2	604-623	target 5' AGGGGCAACCUGAGAACACA 3'<br /> ::::: :::::::::::::<br />query 3' UCCCCACUGGACUCUUGUGU 5'	2	0.84	UCCCCACUGGACUCUUGUGU<br />|||||..|||||||||||||<br />AGGGGCAACCUGAGAACACA
580	pyr-4034	Pbr006114.1	4	821-839	target 5' AGCGGU-ACAUGAGAACACA 3'<br /> :: ::: :: ::::::::::<br />query 3' UCCCCACUGGACUCUUGUGU 5'	-	-	-
581	pyr-964	Pbr034904.1	3.5	150-169	target 5' GAAGCUGAGGAUGGAUAGCU 3'<br /> : :.:: :::::::::::: <br />query 3' CCUUGAGUCCUACCUAUCGC 5'	3.5	0.73	CCUUGAGUCCUACCUAUCGC<br />|.|o||.||||||||||||.<br />GAAGCUGAGGAUGGAUAGCU
582	pyr-novel-miR-30-3p	Pbr011272.2	3.5	882-901	target 5' GGAGA-AGAAGAAAAGAGAGG 3'<br /> :. :: :::::::::::::: <br />query 3' CUACUGUCUUCUUUUCUCUCG 5'	-	-	-
583	pyr-novel-miR-131-3p	Pbr001412.1	2	159-179	target 5' CAGGGAAACUCUCCUUUGGCU 3'<br /> ::::: :::::::::::::: <br />query 3' GUCCCGUUGAGAGGAAACCGU 5'	2	0.85	GUCCCGUUGAGAGGAAACCGU<br />|||||.||||||||||||||.<br />CAGGGAAACUCUCCUUUGGCU
584	pyr-3330	Pbr010433.1	3	496-516	target 5' UUGGAAGCCUUGGAGGGAGAA 3'<br /> ::::::::::: :::::::: <br />query 3' AACCUUCGGAAACUCCCUCUA 5'	3	0.91	AACCUUCGGAAACUCCCUCUA<br />|||||||||||.||||||||.<br />UUGGAAGCCUUGGAGGGAGAA
585	pyr-novel-miR-144-3p	Pbr003857.1	4	405-425	target 5' AAGGGGAACUCUCUUCUGGCA 3'<br /> ::::: :::::::.: :::::<br />query 3' UUCCCGUUGAGAGGAAACCGU 5'	-	-	-
586	pyr-2216	Pbr038768.1	4	76-95	target 5' GAGUCUUCCCAAA-ACUUCAA 3'<br /> :::: ..:::::: :::::::<br />query 3' CUCAAGGGGGUUUGUGAAGUU 5'	-	-	-
587	pyr-novel-miR-17-3p	Pbr028018.1	3.5	966-985	target 5' GAG-UGCUCUAAACACUUCAG 3'<br /> ::: : :.:.:::::::::::<br />query 3' CUCAAGGGGGUUUGUGAAGUC 5'	-	-	-
588	pyr-4860	Pbr015934.2	-	-	-	3.5		ACCUUCGGAAACUCCCUCU<br />|||o||.||||||.|||||<br />UGGGAGGCUUUGAUGGAGA
589	pyr-novel-miR-108-3p	Pbr011100.1	3.5	2375-2395	target 5' CAGGCCAGCUCUUCUUUGGCU 3'<br /> :::: ::.::::.::::::: <br />query 3' GUCCCGUUGAGAGGAAACCGU 5'	3.5	0.79	GUCCCGUUGAGAGGAAACCGU<br />||||.||o||||o|||||||.<br />CAGGCCAGCUCUUCUUUGGCU
590	pyr-1804	Pbr006259.1	4	215-236	target 5' CAACAAUUGCUCCUUUGGCAGA 3'<br /> ::::: :::::::::::::<br />query 3' CCCGUUAA-GAGGAAACCGUCU 5'	-	-	-
591	pyr-novel-miR-30-3p	Pbr010667.1	4	851-870	target 5' GA-GAGAGAAGAGAAGAGAGA 3'<br /> :: :: ::::::.::::::: <br />query 3' CUACUGUCUUCUUUUCUCUCG 5'	-	-	-
592	pyr-novel-miR-49-3p	Pbr034601.1	3.5	1529-1549	target 5' CUGAUCAGGU-UCCUUUGGCAG 3'<br /> :::: :::.: :::::::::::<br />query 3' GACUCGUCUAGAGGAAACCGUC 5'	-	-	-
593	pyr-1557	Pbr009275.1	3.5	256-276	target 5' GGGUUUCGCCAAACGCUUCAU 3'<br /> :.:::.: ::::::.:::::.<br />query 3' CUCAAGGGGGUUUGUGAAGUG 5'	-	-	-
594	pyr-novel-miR-10-3p	Pbr023144.1	3.5	31-54	target 5' UCCUCUCCUGAGCUAAUGGAGAGG 3'<br /> :::::::::::.::::::: :::.<br />query 3' AGGAGAGGACUUGAUUACCACUCU 5'	3	0.89	AGGAGAGGACUUGAUUACCACUCU<br />|||||||||||o|||||||.|||o<br />UCCUCUCCUGAGCUAAUGGAGAGG
595	pyr-518	Pbr008910.2	3.5	960-981	target 5' GGGAUGGGAGGAAUGGGGAAGA 3'<br /> ::.:::::::: ::.:::::::<br />query 3' CCUUACCCUCCGUAUCCCUUCU 5'	3.5	0.86	CCUUACCCUCCGUAUCCCUUCU<br />||o||||||||.||o|||||||<br />GGGAUGGGAGGAAUGGGGAAGA
596	pyr-1557	Pbr018761.1	1.5	352-372	target 5' GAGUUUCUCCAAACACUUCAU 3'<br /> :::::.:.::::::::::::.<br />query 3' CUCAAGGGGGUUUGUGAAGUG 5'	1.5	0.85	CUCAAGGGGGUUUGUGAAGUG<br />|||||o|o||||||||||||o<br />GAGUUUCUCCAAACACUUCAU
597	pyr-4017	Pbr019749.1	3.5	1222-1242	target 5' GGGGU-UGAGGAAUUGGAAAGG 3'<br /> ::..: ::::::::::::::.<br />query 3' CCUUACCCUCCUUAACCUUUCU 5'	-	-	-
598	pyr-novel-miR-18-3p	Pbr002483.1	0	133-153	target 5' AAGCUAGUUGCAAUAAGUUCA 3'<br /> :::::::::::::::::::::<br />query 3' UUCGAUCAACGUUAUUCAAGU 5'	0	1.00	UUCGAUCAACGUUAUUCAAGU<br />|||||||||||||||||||||<br />AAGCUAGUUGCAAUAAGUUCA
599	pyr-novel-miR-46-3p	Pbr022573.1	3.5	129-149	target 5' AGGUUCCACCAAACACUUCAA 3'<br /> .::::: :::::::::::: <br />query 3' CUCAAGGGGGUUUGUGAAGUC 5'	-	-	-
600	pyr-novel-miR-84-3p	Pbr032620.1	3	209-230	target 5' GAGUCCCCACCAAACAUUUCAG 3'<br /> :::: ::: :::::::.:::::<br />query 3' CUCAAGGG-GGUUUGUGAAGUC 5'	3	0.78	CUCAAGGG-GGUUUGUGAAGUC<br />||||.|||.|||||||o|||||<br />GAGUCCCCACCAAACAUUUCAG
601	pyr-2216	Pbr034014.5	2	928-948	target 5' GGUUUCCUCCAAACACUUCAA 3'<br /> :. ::::.:::::::::::::<br />query 3' CUCAAGGGGGUUUGUGAAGUU 5'	2	0.78	CUCAAGGGGGUUUGUGAAGUU<br />|o.||||o|||||||||||||<br />GGUUUCCUCCAAACACUUCAA
602	pyr-4218	Pbr010433.1	3	497-516	target 5' UGGAAGCCUUGGAGGGAGAA 3'<br /> :::::::::: :::::::: <br />query 3' ACCUUCGGAAACUCCCUCUA 5'	3	0.91	ACCUUCGGAAACUCCCUCUA<br />||||||||||.||||||||.<br />UGGAAGCCUUGGAGGGAGAA
603	pyr-novel-miR-46-3p	Pbr034014.5	3	928-948	target 5' GGUUUCCUCCAAACACUUCAA 3'<br /> :. ::::.:::::::::::: <br />query 3' CUCAAGGGGGUUUGUGAAGUC 5'	3	0.75	CUCAAGGGGGUUUGUGAAGUC<br />|o.||||o||||||||||||.<br />GGUUUCCUCCAAACACUUCAA
604	pyr-89	Pbr017190.1	4	336-356	target 5' GACUUUCUUCAAACACUUCGU 3'<br /> :: ::.:..::::::::::.:<br />query 3' CUCAAGGGGGUUUGUGAAGUA 5'	-	-	-
605	pyr-3809	Pbr002903.1	3	248-268	target 5' CAGGGCAACUCUUCUUUGGCU 3'<br /> :::::::::::.::::::: <br />query 3' UUCCCGUUGAGAGGAAACCGU 5'	3	0.84	UUCCCGUUGAGAGGAAACCGU<br />.|||||||||||o|||||||.<br />CAGGGCAACUCUUCUUUGGCU
606	pyr-4860	Pbr010206.1	4	223-242	target 5' UGUGAAGCUUUUGAGGGUGA 3'<br /> :: :::::.:::::::: ::<br />query 3' AC-CUUCGGAAACUCCCUCU 5'	-	-	-
607	pyr-novel-miR-30-3p	Pbr015908.1	4	180-199	target 5' GAUGA-AGAAGAAGAGAGGGA 3'<br /> ::::: :::::::.::::.: <br />query 3' CUACUGUCUUCUUUUCUCUCG 5'	-	-	-
608	pyr-4017	Pbr023112.3	3	625-646	target 5' GGGAUGGGGGGAAUGGGAAAGA 3'<br /> ::.:::::.::::: :::::::<br />query 3' CCUUACCCUCCUUAACCUUUCU 5'	3	0.88	CCUUACCCUCCUUAACCUUUCU<br />||o|||||o|||||.|||||||<br />GGGAUGGGGGGAAUGGGAAAGA
609	pyr-4860	Pbr013109.1	3.5	182-200	target 5' GGGAAGCUUUUGGGGGAGG 3'<br /> ::::::.::::.:::::.<br />query 3' ACCUUCGGAAACUCCCUCU 5'	3.5	0.80	ACCUUCGGAAACUCCCUCU<br />.||||||o||||o|||||o<br />GGGAAGCUUUUGGGGGAGG
610	pyr-novel-miR-46-3p	Pbr018861.1	3.5	391-411	target 5' GAGUUCCUCCAAACUCUUCAU 3'<br /> :::::::.:::::: ::::: <br />query 3' CUCAAGGGGGUUUGUGAAGUC 5'	3.5	0.81	CUCAAGGGGGUUUGUGAAGUC<br />|||||||o||||||.|||||.<br />GAGUUCCUCCAAACUCUUCAU
611	pyr-166	Pbr039222.1	4	583-604	target 5' GGCAUGGGAGGACUGGGGAAGA 3'<br /> :: ::::::::: :.:::::::<br />query 3' CCUUACCCUCCUUAUCCCUUCU 5'	-	-	-
612	pyr-4034	Pbr035916.1	4	187-207	target 5' AAGGGCGACCUGACGAACACA 3'<br /> : ::: ::::::: :::::::<br />query 3' UCCCCACUGGACU-CUUGUGU 5'	-	-	-
613	pyr-novel-miR-17-3p	Pbr018861.1	3.5	391-411	target 5' GAGUUCCUCCAAACUCUUCAU 3'<br /> :::::::.:::::: ::::: <br />query 3' CUCAAGGGGGUUUGUGAAGUC 5'	3.5	0.81	CUCAAGGGGGUUUGUGAAGUC<br />|||||||o||||||.|||||.<br />GAGUUCCUCCAAACUCUUCAU
614	pyr-3330	Pbr035826.1	4	345-364	target 5' UUGGAAGCCAUUGA-GGAGAU 3'<br /> ::::::::: :::: ::::::<br />query 3' AACCUUCGGAAACUCCCUCUA 5'	-	-	-
615	pyr-4249	Pbr037324.1	4	1835-1854	target 5' CUGCAUG-GGAGGCUUAUCGC 3'<br /> ::: ::: .::::::::::: <br />query 3' GACCUACGUCUCCGAAUAGCU 5'	-	-	-
616	pyr-novel-miR-46-3p	Pbr032620.1	3	209-230	target 5' GAGUCCCCACCAAACAUUUCAG 3'<br /> :::: ::: :::::::.:::::<br />query 3' CUCAAGGG-GGUUUGUGAAGUC 5'	3	0.78	CUCAAGGG-GGUUUGUGAAGUC<br />||||.|||.|||||||o|||||<br />GAGUCCCCACCAAACAUUUCAG
617	pyr-novel-miR-65-3p	Pbr002903.1	4	248-268	target 5' CAGGGCAACUCUUCUUUGGCU 3'<br /> :::::::: :::.::::::: <br />query 3' GUCCCGUUAAGAGGAAACCGU 5'	3	0.85	GUCCCGUUAAGAGGAAACCGU<br />||||||||.|||o|||||||.<br />CAGGGCAACUCUUCUUUGGCU
618	pyr-166	Pbr038473.1	3	601-622	target 5' GGCAUGGGAGGAAUUGGGAAGA 3'<br /> :: ::::::::::: :::::::<br />query 3' CCUUACCCUCCUUAUCCCUUCU 5'	3	0.82	CCUUACCCUCCUUAUCCCUUCU<br />||.|||||||||||.|||||||<br />GGCAUGGGAGGAAUUGGGAAGA
619	pyr-novel-miR-17-3p	Pbr032620.1	3	209-230	target 5' GAGUCCCCACCAAACAUUUCAG 3'<br /> :::: ::: :::::::.:::::<br />query 3' CUCAAGGG-GGUUUGUGAAGUC 5'	3	0.78	CUCAAGGG-GGUUUGUGAAGUC<br />||||.|||.|||||||o|||||<br />GAGUCCCCACCAAACAUUUCAG
620	pyr-1950	Pbr036234.1	2.5	6723-6743	target 5' UGGUUAUGCAACCGUCGUCUC 3'<br /> .:::.::.:::::::::::: <br />query 3' GCCAGUAUGUUGGCAGCAGAU 5'	2.5	0.90	GCCAGUAUGUUGGCAGCAGAU<br />o|||o||o||||||||||||.<br />UGGUUAUGCAACCGUCGUCUC
621	pyr-1983	Pbr017581.1	3.5	639-659	target 5' UUUUGUUCUGCCUCUUCCUUG 3'<br /> .. ::.::::::::::::.::<br />query 3' GGUACGAGACGGAGAAGGGAC 5'	3.5	0.74	GGUACGAGACGGAGAAGGGAC<br />oo.||o||||||||||||o||<br />UUUUGUUCUGCCUCUUCCUUG
622	pyr-novel-miR-127-3p	Pbr030728.1	3.5	675-694	target 5' GAAGA-AGAAGAAAAGAGGGU 3'<br /> :: :: ::::::::::::.:.<br />query 3' CUACUGUCUUCUUUUCUCUCG 5'	-	-	-
623	pyr-3330	Pbr032574.1	4	2401-2421	target 5' UUGGUAGCCGUUGGGGGAGAU 3'<br /> :::: :::: :::.:::::::<br />query 3' AACCUUCGGAAACUCCCUCUA 5'	-	-	-
624	pyr-4693	Pbr032486.1	4	2285-2306	target 5' AAGCUAGUAUGUAAUGAGUUCA 3'<br /> :::::::: ::.:::.::::: <br />query 3' UUCGAUCA-ACGUUAUUCAAGC 5'	-	-	-
625	pyr-novel-miR-137-5p	Pbr010433.1	4	492-513	target 5' UAUAUUGGAAGCCUUGGAGGGA 3'<br /> ::::::: :::::: ::::::<br />query 3' UUAUAACCCUCGGAAACUCCCU 5'	-	-	-
626	pyr-4017	Pbr038470.1	4	601-622	target 5' GGCAUGGGAGGACUUGGGAAGA 3'<br /> :: ::::::::: ::::.::::<br />query 3' CCUUACCCUCCUUAACCUUUCU 5'	-	-	-
627	pyr-1557	Pbr018861.1	3	391-411	target 5' GAGUUCCUCCAAACUCUUCAU 3'<br /> :::::::.:::::: :::::.<br />query 3' CUCAAGGGGGUUUGUGAAGUG 5'	3	0.82	CUCAAGGGGGUUUGUGAAGUG<br />|||||||o||||||.|||||o<br />GAGUUCCUCCAAACUCUUCAU
628	pyr-317	Pbr003067.1	4	52-72	target 5' GCGGUGUGGGUGCAAAUUGCA 3'<br /> : ::::..:::::::: ::::<br />query 3' CUCCACGUCCACGUUU-ACGU 5'	-	-	-
629	pyr-novel-miR-30-3p	Pbr005286.1	4	822-842	target 5' GAAGAAAGAAGAGAAGAGAGA 3'<br /> :: :: ::::::.::::::: <br />query 3' CUACUGUCUUCUUUUCUCUCG 5'	-	-	-
630	pyr-novel-miR-117-3p	Pbr018761.1	2	352-372	target 5' GAGUUUCUCCAAACACUUCAU 3'<br /> :::::.:.:::::::::::: <br />query 3' CUCAAGGGGGUUUGUGAAGUC 5'	2	0.83	CUCAAGGGGGUUUGUGAAGUC<br />|||||o|o||||||||||||.<br />GAGUUUCUCCAAACACUUCAU
631	pyr-3330	Pbr011556.1	4	673-693	target 5' UUAAAAGCUUUUGAGGGAGAA 3'<br /> :: ::::.::::::::::: <br />query 3' AACCUUCGGAAACUCCCUCUA 5'	3.5	0.73	AACCUUCGGAAACUCCCUCUA<br />||..||||o|||||||||||.<br />UUAAAAGCUUUUGAGGGAGAA
632	pyr-novel-miR-46-3p	Pbr014657.1	3.5	678-698	target 5' GAGUUCCUCCAAACUCUUCAU 3'<br /> :::::::.:::::: ::::: <br />query 3' CUCAAGGGGGUUUGUGAAGUC 5'	3.5	0.81	CUCAAGGGGGUUUGUGAAGUC<br />|||||||o||||||.|||||.<br />GAGUUCCUCCAAACUCUUCAU
633	pyr-novel-miR-30-3p	Pbr012857.1	4	1556-1575	target 5' GAAGA-AGAAGAAGAGAGAGA 3'<br /> :: :: :::::::.:::::: <br />query 3' CUACUGUCUUCUUUUCUCUCG 5'	-	-	-
634	pyr-novel-miR-46-3p	Pbr020839.1	3	979-999	target 5' GGUUUCCUCCAAACACUUCAA 3'<br /> :. ::::.:::::::::::: <br />query 3' CUCAAGGGGGUUUGUGAAGUC 5'	3	0.75	CUCAAGGGGGUUUGUGAAGUC<br />|o.||||o||||||||||||.<br />GGUUUCCUCCAAACACUUCAA
635	pyr-518	Pbr021958.1	4	535-556	target 5' GGUAUUGGAGGCGUGGGGAAGA 3'<br /> :: :: ::::::.:.:::::::<br />query 3' CCUUACCCUCCGUAUCCCUUCU 5'	-	-	-
636	pyr-novel-miR-65-5p	Pbr012399.1	3.5	75-95	target 5' UUUGCCAAACGAGAUUUGCGC 3'<br /> :.::::::: :::::::::.:<br />query 3' AGACGGUUUCCUCUAAACGUG 5'	3.5	0.80	AGACGGUUUCCUCUAAACGUG<br />|o|||||||.|||||||||o|<br />UUUGCCAAACGAGAUUUGCGC
637	pyr-1983	Pbr026595.1	2.5	1258-1277	target 5' ACAU-CUUUGCCUCUUCCCUG 3'<br /> ::: ::.:::::::::::::<br />query 3' GGUACGAGACGGAGAAGGGAC 5'	-	-	-
638	pyr-novel-miR-9-3p	Pbr030189.1	4	30-51	target 5' GUCGGAGCAAGGGGAGCAGGUG 3'<br /> :: :::: :::::::::: :::<br />query 3' CAACCUC-UUCCCCUCGUGCAC 5'	-	-	-
639	pyr-753	Pbr024723.3	4	2665-2685	target 5' UCUCGAAACAGAUGGUAUUCU 3'<br /> ::::::: ::::.:..:::::<br />query 3' AGAGCUUGGUCUGCUGUAAGA 5'	-	-	-
640	pyr-166	Pbr024723.3	3.5	944-965	target 5' GGGAUGUCUGGAAUAGGGAAGA 3'<br /> ::.::: :::::::::::::<br />query 3' CCUUACCCUCCUUAUCCCUUCU 5'	3.5	0.75	CCUUACCCUCCUUAUCCCUUCU<br />||o|||...|||||||||||||<br />GGGAUGUCUGGAAUAGGGAAGA
641	pyr-novel-miR-127-3p	Pbr013970.1	4	665-685	target 5' GGCUGCAGAAGAAAAGAGGGC 3'<br /> :. .:::::::::::::.::<br />query 3' CUACUGUCUUCUUUUCUCUCG 5'	-	-	-
