# Supplementary material for: The Effect of Different Pollination on the Expression of Dangshan Su Pear MicroRNA
Source: Biomed Res Int. 2017 Apr 10;2017:2794040. doi: 10.1155/2017/2794040 (PMC5402243; doi:10.1155/2017/2794040)
Supplement: Supplementary file 1 — These Supplementary Materials contained the detailed data of the primer sequences used in this study, those known and novel microRNAs, differentially expressed microRNAs, the target genes of the differentially expressed microRNAs and which corresponding GO function enrichment analysis and KEGG pathway analysis in “Dangshan su” Pear of different male parent pollination. [file 2794040.f1.zip › Supplementary Material/Supplementary Material7/GO_pie.bar.xls]

#GO_items	Numbers	Percent
#biological_process	160
response to endogenous stimulus	3	1.88%
transport	19	11.88%
cellular process	73	45.63%
cellular component organization	3	1.88%
metabolic process	62	38.75%
response to biotic stimulus	0	0.00%
growth	0	0.00%
embryo development	0	0.00%
response to abiotic stimulus	0	0.00%
death	0	0.00%
regulation of gene expression, epigenetic	0	0.00%
multicellular organismal development	0	0.00%
response to external stimulus	0	0.00%
response to stress	0	0.00%
#cellular_component	30
nucleus	10	33.33%
extracellular region	2	6.67%
membrane	14	46.67%
cytoplasm	2	6.67%
intracellular	2	6.67%
nucleolus	0	0.00%
mitochondrion	0	0.00%
external encapsulating structure	0	0.00%
ribosome	0	0.00%
plastid	0	0.00%
peroxisome	0	0.00%
cytoskeleton	0	0.00%
endoplasmic reticulum	0	0.00%
#molecular_function	238
sequence-specific DNA binding transcription factor activity	15	6.30%
binding	134	56.30%
transporter activity	17	7.14%
enzyme regulator activity	2	0.84%
catalytic activity	70	29.41%
signal transducer activity	0	0.00%
structural molecule activity	0	0.00%
receptor activity	0	0.00%
