# Supplementary figures and images for: The Effect of Different Pollination on the Expression of Dangshan Su Pear MicroRNA
Source: Hindawi journal article supplement (doi:10.1155/2017/2794040), 2017-01-01

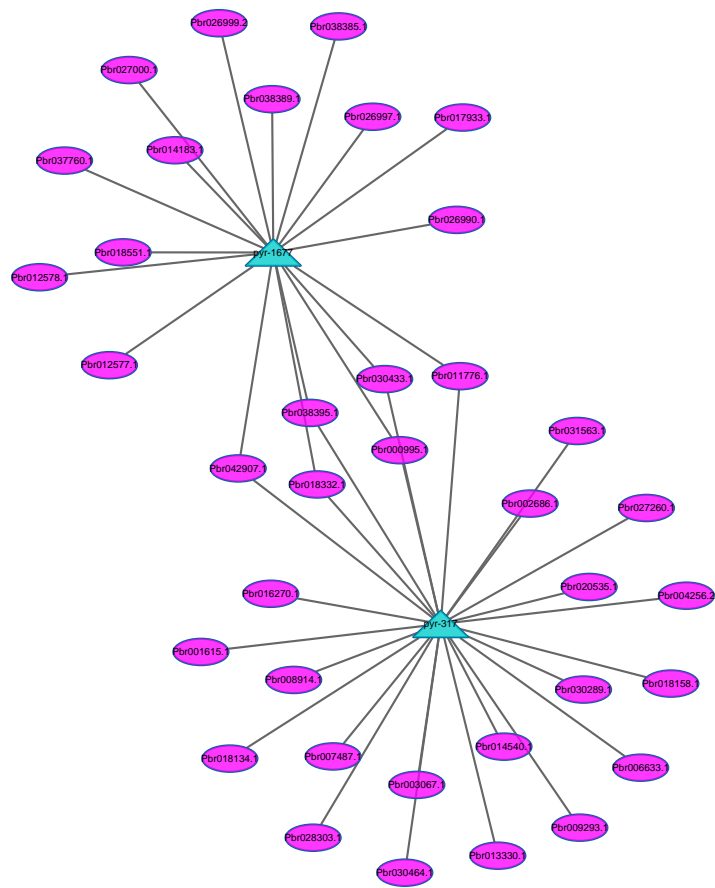

Supplement: f1 [file 2794040.f1.zip]

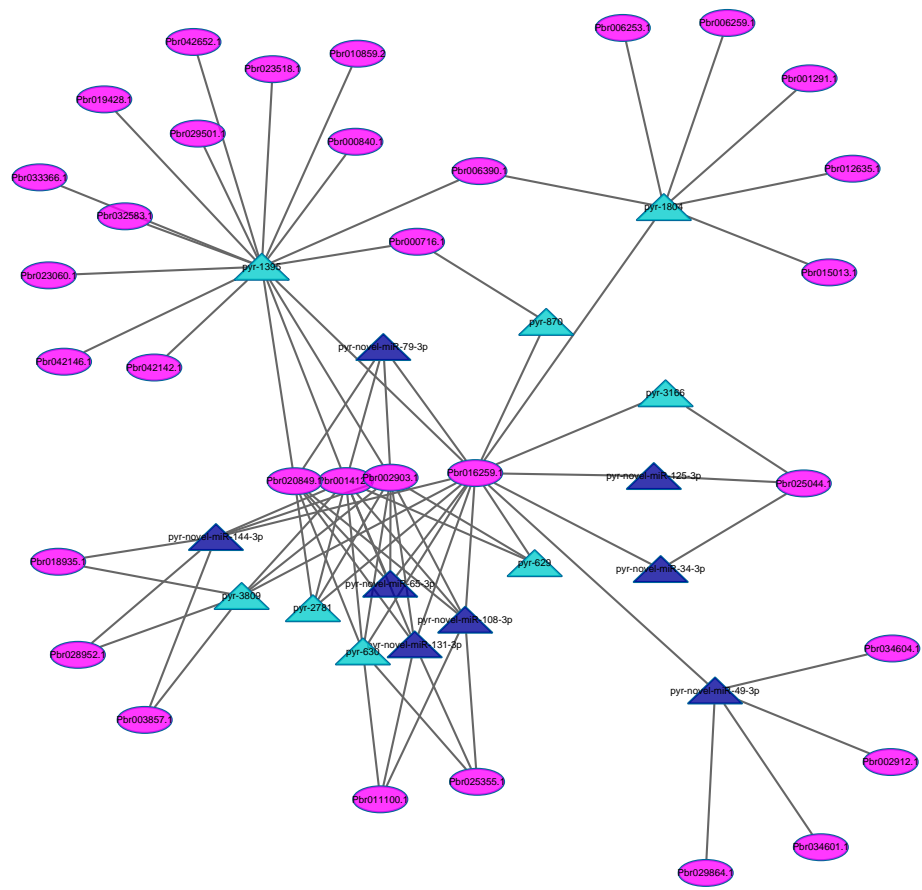

Supplement: f1 [file 2794040.f1.zip]

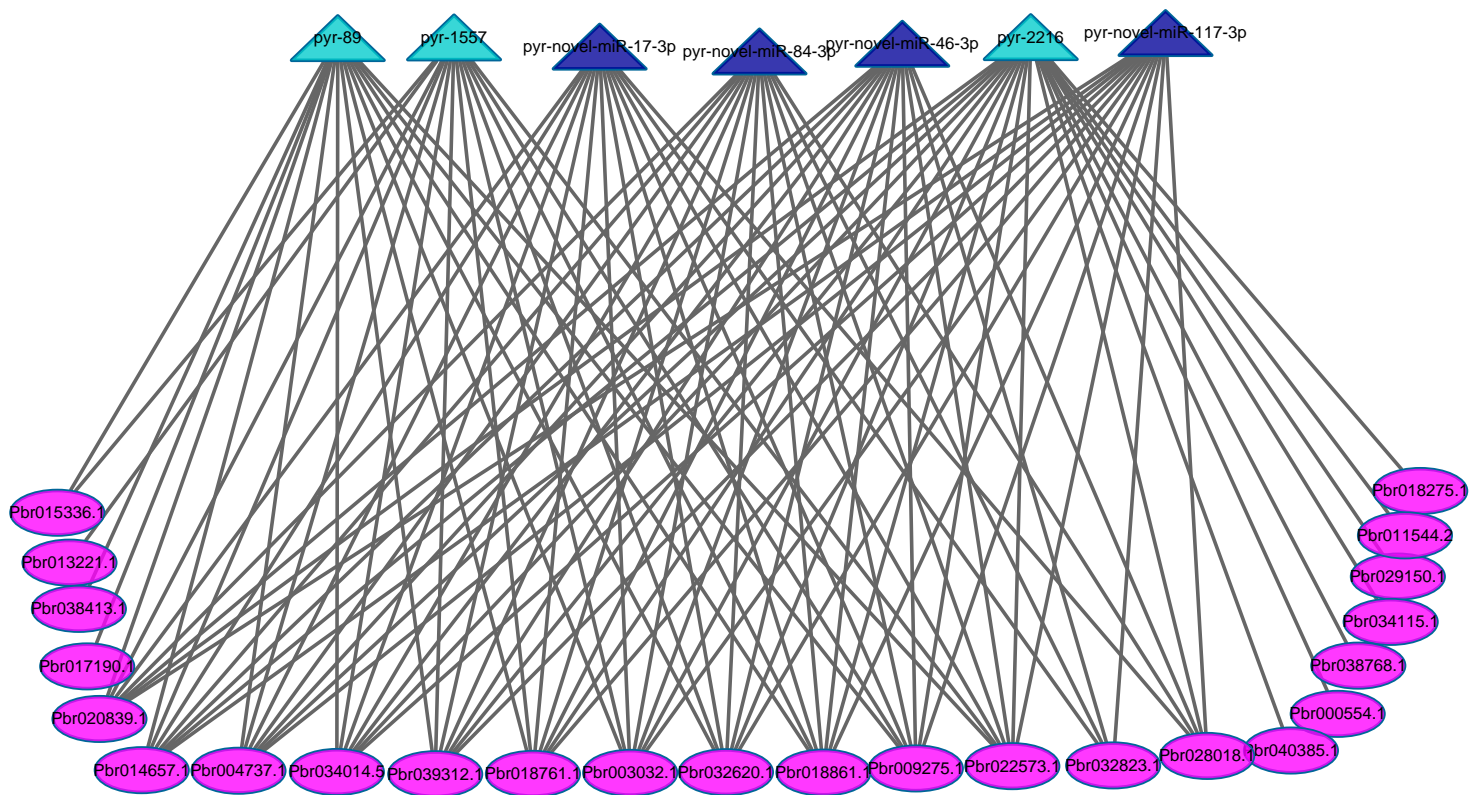

Supplement: f1 [file 2794040.f1.zip]

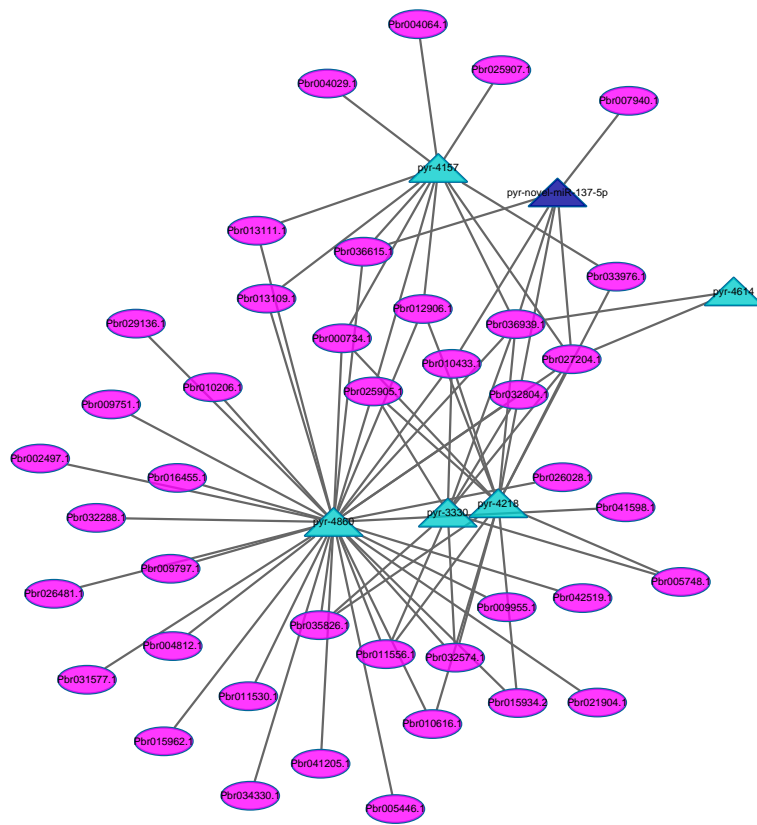

Supplement: f1 [file 2794040.f1.zip]

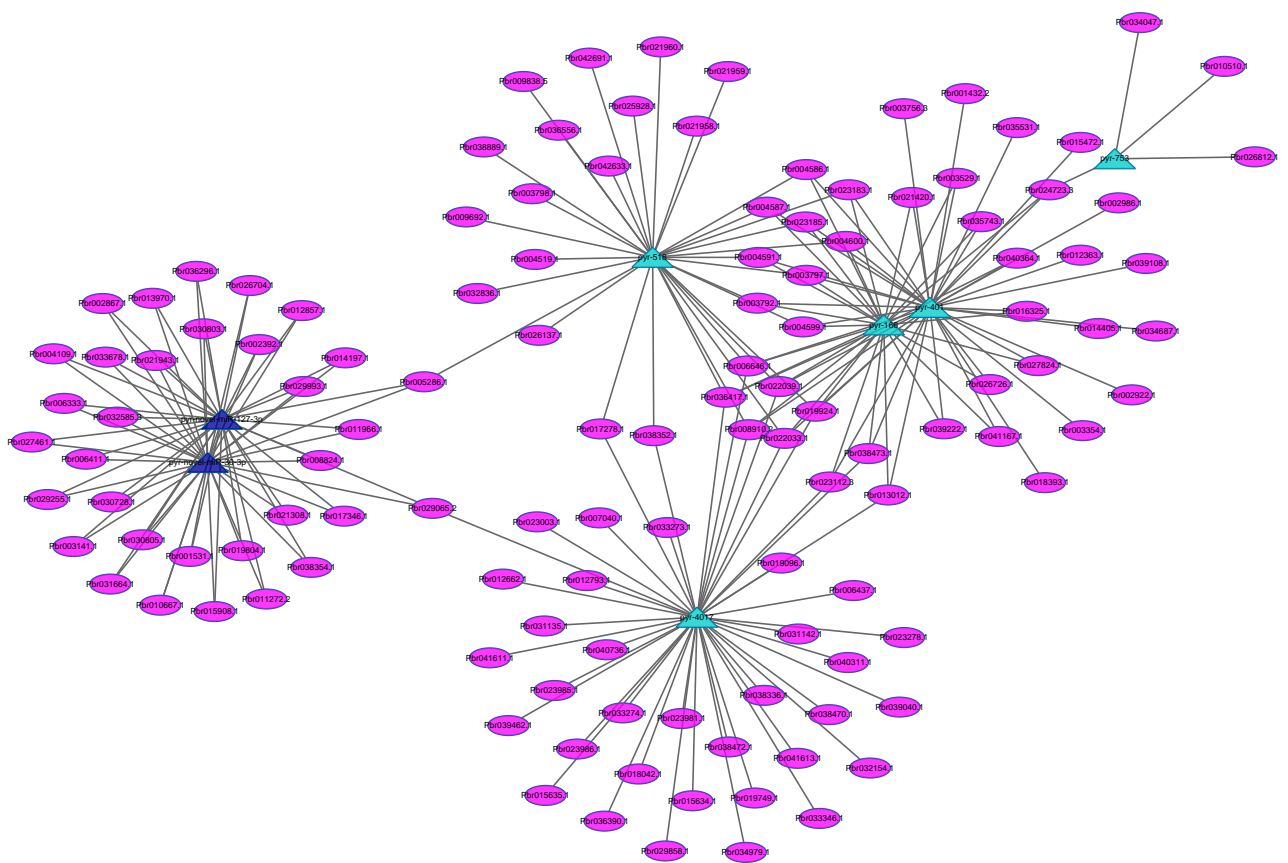

Supplement: f1 [file 2794040.f1.zip]

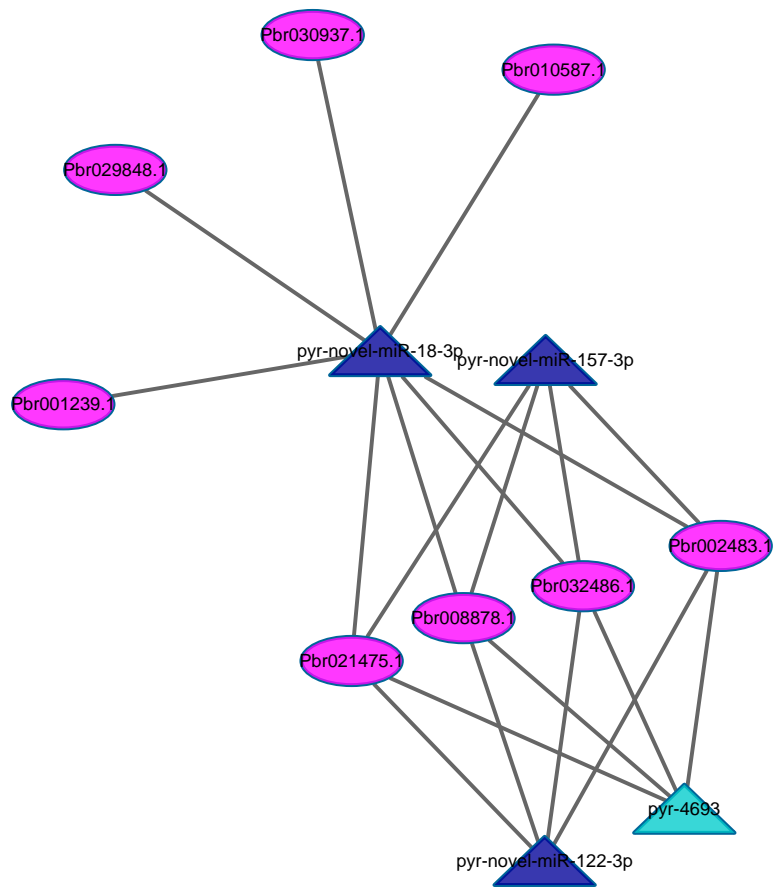

Supplement: f1 [file 2794040.f1.zip]
